# Supplementary material for: Organo-cation catalyzed enantioselective α-hydroxylation of pyridinone-fused lactones: asymmetric synthesis of SN-38 and irinotecan
Source: Royal Society of Chemistry journal article supplement (doi:10.1039/d4cc03580a), 2024-01-01

Supporting Information for

**Organo-Cation Catalyzed Enantioselective  $\alpha$ -Hydroxylation of  
Pyridinone-Fused Lactones: Asymmetric Synthesis of SN-38 and  
Irinotecan**

Jin-Rui Tian,<sup>a</sup> Yu-Hao Qiao,<sup>a</sup> Qing-Bo Zhuang,<sup>a,b</sup> Rong Fan,<sup>a</sup> Zhen Li,<sup>a</sup> Xiao-Ming Zhang,<sup>a\*</sup> Fu-Min Zhang,<sup>a</sup> and Yong-Qiang Tu<sup>a\*</sup>

<sup>a</sup>State Key Laboratory of Applied Organic Chemistry & College of Chemistry and Chemical Engineering, Lanzhou University, Lanzhou 730000, P. R. China.

<sup>b</sup>School of Pharmaceutical Sciences, National Key Laboratory of Innovative Immunotherapy, Shanghai Jiao Tong University, Shanghai, 200240, China.

Email: [zhangxiaom@lzu.edu.cn](mailto:zhangxiaom@lzu.edu.cn), [tuyq@lzu.edu.cn](mailto:tuyq@lzu.edu.cn)

Table of Contents

|                                                                                       |    |
|---------------------------------------------------------------------------------------|----|
| 1. General Information.....                                                           | 2  |
| 2. Experimental Details for the Synthesis of Pyridinone-Fused Lactones. ....          | 3  |
| 3. Experimental Details for the Synthesis of Catalysts.....                           | 26 |
| 4. Optimization Studies of $\alpha$ -Hydroxylation of Pyridinone-Fused Lactones ..... | 35 |
| 5. Experimental Details for the Synthesis of Lactones 2a-2t.....                      | 39 |
| 6. Experimental Details for Transformations of the Products .....                     | 57 |
| 7. X-ray Crystal Structures of Compounds 2a .....                                     | 62 |
| 8. References.....                                                                    | 63 |
| 9. Copies of NMR Spectra .....                                                        | 64 |

## 1. General Information

All moisture or air sensitive reactions were carried out under an argon atmosphere in oven-dried flasks. Except for commercially available ultradry solvents, all solvents were purified by standard methods as indicated and were transferred under argon. Toluene and THF were distilled from sodium, while DCM was distilled from CaH<sub>2</sub>. All other commercially available reagents were used as received without further purification unless otherwise noted. All reactions were monitored by thin-layer chromatography (TLC) on silica gel F<sub>254</sub> plates using UV light as visualizing agent (if applicable). The products were purified by flash column chromatography on silica gel (200-300 meshes).

<sup>1</sup>H NMR, <sup>13</sup>C NMR and <sup>19</sup>F NMR spectra were recorded in CDCl<sub>3</sub> or DMSO-d<sub>6</sub> solution on Bruker AVANCE<sup>III</sup> 400 MHz, Bruker AVANCE<sup>III</sup> HD 400 MHz or Bruker AVANCE NEO 600 MHz instrument. Chemical shifts were denoted in ppm (δ) and calibrated by using residual undeuterated solvent (CHCl<sub>3</sub> (7.26 ppm), tetramethylsilane (0.00 ppm)) as Sernal reference for <sup>1</sup>H NMR and the deuterated solvent (CDCl<sub>3</sub> (77.0 ppm), DMSO-d<sub>6</sub> (39.5 ppm)) as Sernal standard for <sup>13</sup>C NMR. The following abbreviations were used to represent the multiplicities: s = singlet, d = doublet, t = triplet, q = quartet, quint = quintet, hept = heptet, dd = doublet of doublets, dt = doublet of triplet, td = triplet of doublets, qd = quartet of doublets, brs = broad singlet, ddd = doublet of doublet of doublets, m = multiplet. High-resolution mass spectral analysis (HRMS) data were measured on a Bruker Apex<sup>II</sup> mass spectrometer by means of the ESI technique. The FT-IR spectra were recorded on Nicolet Nexus 670 FT-IR spectrometer using neat thin film technique with potassium bromide (KBr) salt plates. The X-ray single-crystal data were recorded on Bruker APEX<sup>II</sup> X-ray single crystal diffractometer.

Optical rotations were measured using a 0.1 mL cell with a 1 cm path length on Rudolph Autopol<sup>IV</sup> automatic polarimeter, and concentrations (c) were reported in g × (100 mL)<sup>-1</sup>. Enantiomeric excesses (ee) were determined by UPC<sup>2</sup> and HPLC equipped with Waters 2998 Photodiode Array Detector.

## 2. Experimental Details for the Synthesis of Pyridinone-Fused Lactones.

**Table S1.** Pyridinone-fused lactones

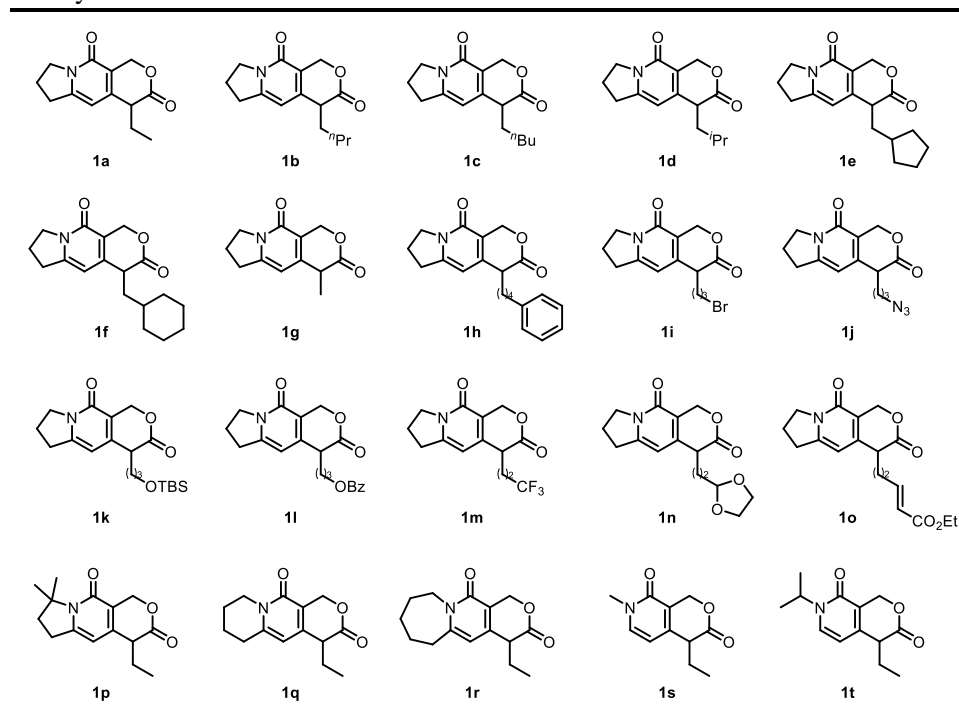

### Procedure A:

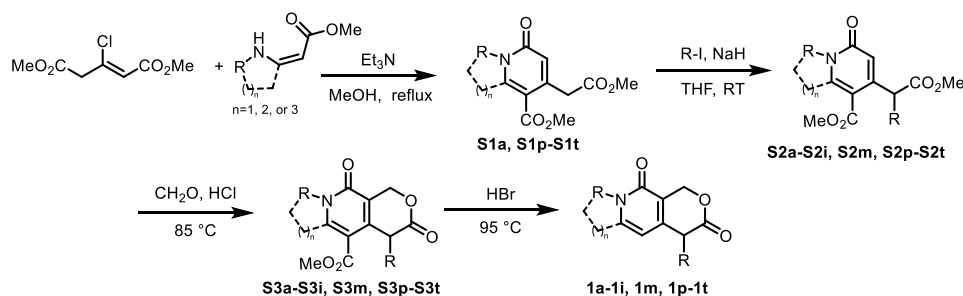

*Note:* 2-Pyridinone-fused lactones **1a-1i**, **1m**, **1p-1t** were synthesized following literature procedure A.<sup>4,5</sup>

**Synthesis of compound S1 (S1a, or S1p-S1t):** To a stirred solution of amide<sup>1,2</sup> (20 mmol, 1.0 equiv.) and diester<sup>3</sup> (24 mmol, 1.2 equiv.) in methanol (30 mL) was added triethylamine (24 mmol, 1.2 equiv.). The resultant solution was refluxed for 29 h. Then, the solvent was evaporated, and dichloromethane was added followed by addition of water (3 × 50 mL). The organic phase was separated, dried over Na<sub>2</sub>SO<sub>4</sub>, and evaporated. The residue was purified by flash chromatography on silica gel to give **S1 (S1a, or S1p-S1t)**.

**Synthesis of compound S2 (S2a-S2i, or S2m, or S2p-S2t):** Under an argon atmosphere, NaH (60%, 11 mmol, 1.1 equiv.) was dissolved in dry THF followed by portion-wise addition of **S1 (S1a, or S1p-S1t)** (10 mmol, 1.0 equiv.). After being stirred for 30 min at room temperature, the mixture was added a solution of iodide (30 mmol, 3.0 equiv.) in THF (10 mL) dropwise over a course of 10 min. The resulting mixture was stirred for another 40 h until consumption of **S1 (S1a, or S1p-S1t)**

indicated by TLC. The reaction was quenched with 20 mL of 0.1 M HCl and extracted with chloroform (4 × 25 mL). The combined organic layers were dried over Na<sub>2</sub>SO<sub>4</sub> and concentrated in vacuo. The residue was purified by flash chromatography on silica gel to give **S2** (**S2a-S2i**, or **S2m**, or **S2p-S2t**).

**Synthesis of compound S3 (S3a-S3i, or S3m, or S3p-S3t):** A stirred mixture of **S2** (**S2a-S2i**, or **S2m**, or **S2p-S2t**) (10 mmol), acetic acid (17.2 mL), concentrated HCl (5.7 mL) and formalin (8 mL, 37%) was heated at 80 °C for 72 h. The mixture was cooled to 0 °C. Then, the reaction was neutralized with 10% NaOH and extracted with DCM (3×30 mL). The combined organic phases were washed with brine (100 mL), dried over Na<sub>2</sub>SO<sub>4</sub>, filtered, and concentrated in vacuo. The crude products were purified by flash chromatography on silica gel to give **S3** (**S3a-S3i**, or **S3m**, or **S3p-S3t**).

**Synthesis of compound 1 (1a-1i, or 1m, or 1p-1t):** A stirred solution of **S3** (**S3a-S3i**, or **S3m**, or **S3p-S3t**) (10 mmol) in 40% hydrobromic acid (30 mL) was heated at 90 °C for 10 h. Then, the mixture was cooled to room temperature followed by removal of the solvent in vacuo. The residue was neutralized with saturated aqueous NaHCO<sub>3</sub> solution (20 mL) and extracted with chloroform (3 × 50 mL). The organic phases were washed with brine (30 mL), dried over Na<sub>2</sub>SO<sub>4</sub>, filtered, and concentrated in vacuo. The crude product was purified by flash chromatography on silica gel to give the lactone products.

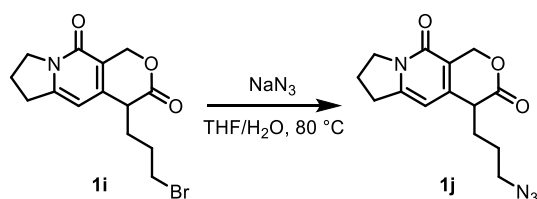

**Synthesis of compound 1j:** A solution of **1i** (10 mmol, 1.0 equiv.) in THF (10 mL) was added to a solution of sodium azide (10 mmol, 1.0 equiv.) in water (0.5 mL) in a round bottomed flask equipped with a stirring bar and reflux condenser. The mixture was pumped and refilled with argon three times. The resulting solution was heated at 80 °C for 5 h. When **1i** was consumed completely, the reaction mixture was allowed to cool to room temperature and extracted with DCM (3×50 mL). The combined organic phases were washed with brine (100 mL), dried over Na<sub>2</sub>SO<sub>4</sub>, filtered, and concentrated in vacuo. The crude product was purified by flash chromatography to give **1j**.

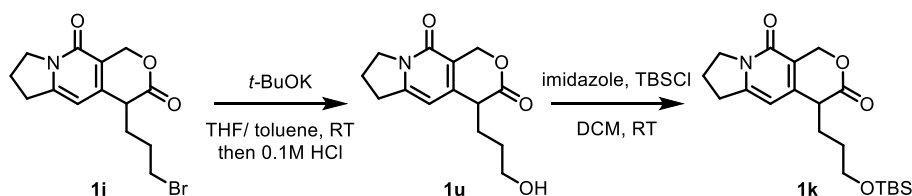

**Synthesis of compound 1u:** To a solution of **1i** (4 mmol, 1.0 equiv.) in THF/toluene (10 mL/5 mL) was added *t*-BuOK (8 mmol, 2.0 equiv.) under an argon atmosphere. The resultant solution was stirred for 8 h at room temperature. Then, the mixture was evaporated and purified by flash chromatography on silica gel (DCM: MeOH = 30:1). The resulting solution was concentrated under vacuum followed by addition of MeOH (5 mL) and 0.1M HCl (1 mL). After being stirred for 24 h

at room temperature, the solution was evaporated and purified by flash chromatography on silica gel to give **1u**.

**Synthesis of compound 1k:** To a stirred solution of **1u** (1 mmol, 1.0 equiv.) in dry DCM (10 mL) was added imidazole (2 mmol, 2.0 equiv.), followed by addition of *tert*-butyldimethylsilyl chloride (1.2 mmol, 1.2 equiv.). After being stirred for an additional 6 h, the reaction mixture was quenched with saturated aqueous NH<sub>4</sub>Cl and extracted with DCM (3 × 25 mL). The combined organic layers were dried over Na<sub>2</sub>SO<sub>4</sub> and concentrated in vacuo. The residue was purified by flash chromatography on silica gel to give **1k**.

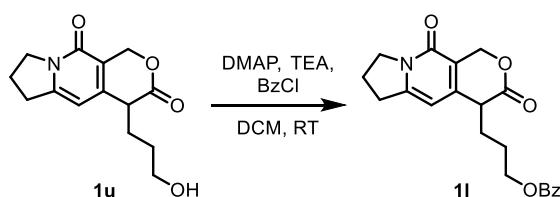

**Synthesis of compound 1l:** To a solution of **1u** (1mmol, 1.0 equiv.), DMAP (4-dimethylaminepyridine) (0.2 mmol, 0.2 equiv.) and triethylamine (1.5 mmol, 1.5 equiv.) was added benzoyl chloride (1 mmol, 1.2 equiv.) in DCM (10 mL) at 0 °C. The reaction mixture was warmed to room temperature, stirred for 6 h, and quenched with H<sub>2</sub>O (2 mL). The water phase was extracted three times with DCM (20 mL). The combined organic layers were dried over Na<sub>2</sub>SO<sub>4</sub> and concentrated in vacuo. The residue was purified by flash chromatography on silica gel to give **1l**.

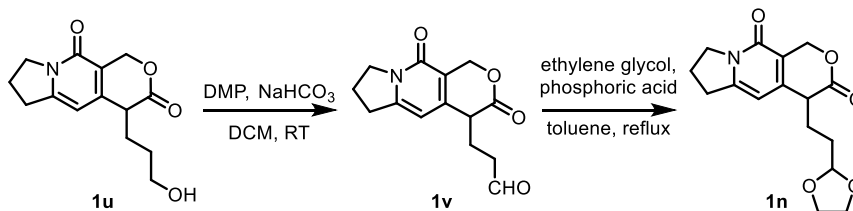

**Synthesis of compound 1v:** To a solution of **1u** (3 mmol, 1.0 equiv.) in DCM (20 mL) was added Dess-Martin periodinane (4.5 mmol, 1.5 equiv.) and NaHCO<sub>3</sub> (15 mmol, 5.0 equiv.). The resultant solution was stirred for 40 min at room temperature. After completion of the reaction, the mixture was quenched with sodium thiosulfate, and the solvent was removed under reduced pressure. The residue was purified by flash chromatography on silica gel to give **1v**.

**Synthesis of compound 1n:** Ethylene glycol (1.3 mmol, 1.3 equiv.) was added to a solution of **1v** (1 mmol, 1.0 equiv.) in toluene (10 mL), followed by addition of phosphoric acid (0.04 mmol, 0.04 equiv.). The reaction mixture was heated at reflux (110 °C) for 4 h, cooled to room temperature, and evaporated under reduced pressure. The residue was purified by flash chromatography on silica gel to give **1n**.

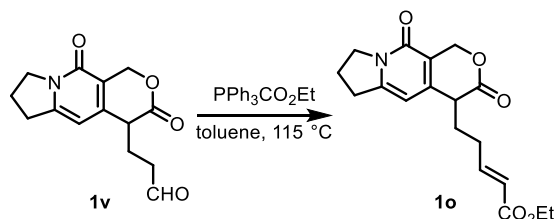

**Synthesis of compound 1o:** Under an argon atmosphere, **1v** (1 mmol, 1.0 equiv.) and ethyl (triphenylphosphoranylidene) acetate (1.1 mmol, 1.1 equiv.) were dissolved in toluene and heated at 112 °C for 12 h. After completion of the reaction, the solvent was evaporated under reduced pressure. The residue was purified by flash chromatography on silica gel to give **1o**.

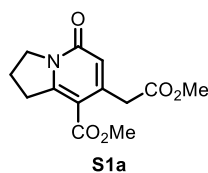

**S1a** was a known compound according to the literature.<sup>4</sup>

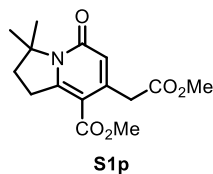

**S1p** was obtained in 68% yield as a pale yellow solid.

**m.p.:** 85.0-86.5 °C.

**TLC:**  $R_f$  = 0.5 (DCM: MeOH = 40:1).

**<sup>1</sup>H NMR** (400 MHz, Chloroform-*d*):  $\delta$  6.19 (s, 1H), 3.78 (s, 3H), 3.73 (s, 2H), 3.71 (s, 3H), 3.35 (t,  $J$  = 7.6 Hz, 2H), 2.04 (t,  $J$  = 8.0 Hz, 2H), 1.68 (s, 6H).

**<sup>13</sup>C NMR** (100 MHz, Chloroform-*d*):  $\delta$  170.9, 166.1, 161.4, 157.2, 145.9, 121.7, 105.9, 69.1, 51.9, 51.4, 40.7, 37.2, 30.7, 25.5.

**HRMS** (ESI):  $m/z$  calcd for  $C_{15}H_{19}NNaO_5$  [ $M+Na$ ]<sup>+</sup>: 316.1155, found 316.1155.

**FT-IR** (cm<sup>-1</sup>): 1741, 1525, 1438, 1343, 1283, 863, 797, 675.

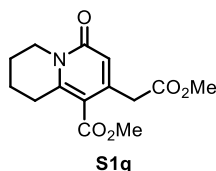

**S1q** was obtained in 76% yield as a yellow solid.

**m.p.:** 57.8-58.9 °C.

**TLC:**  $R_f$  = 0.4 (DCM: MeOH = 40:1).

**<sup>1</sup>H NMR** (600 MHz, Chloroform-*d*):  $\delta$  6.32 (s, 1H), 4.28 (q,  $J$  = 7.2 Hz, 1H), 4.03 (t,  $J$  = 6.4 Hz, 2H), 3.81 (s, 1H), 3.69 (s, 3H), 3.63 (d,  $J$  = 8.4 Hz, 2H), 3.03-2.97 (m, 2H), 1.93 (quint,  $J$  = 6.6 Hz, 2H), 1.81 (quint,  $J$  = 6.6 Hz, 2H), 1.34 (t,  $J$  = 6.6 Hz, 2H).

**<sup>13</sup>C NMR** (150 MHz, Chloroform-*d*): δ 170.3, 170.2, 167.0, 166.6, 161.9, 150.9, 150.6, 143.9, 143.8, 118.4, 111.4, 110.9, 61.2, 52.0, 51.8, 41.7, 40.2, 40.0, 27.0, 21.2, 18.2, 13.9.  
**HRMS** (ESI): *m/z* calcd for C<sub>14</sub>H<sub>18</sub>NO<sub>5</sub> [M+H]<sup>+</sup>: 280.1179, found 280.1177.  
**FT-IR** (cm<sup>-1</sup>): 1740, 1518, 1436, 1288, 1141, 1015, 857, 743.

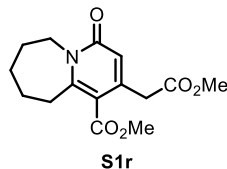

**S1r** was obtained in 75% yield as a pale yellow solid.

**m.p.:** 55.6-56.9 °C.

**TLC:** R<sub>f</sub> = 0.4 (DCM: MeOH = 40:1).

**<sup>1</sup>H NMR** (600 MHz, Chloroform-*d*): δ 6.33 (s, 1H), 4.41 (s, 2H), 3.81 (s, 3H), 3.70 (s, 3H), 3.57 (s, 2H), 2.94-2.90 (m, 2H), 1.85-1.78 (m, 4H), 1.77-1.74 (m, 2H).

**<sup>13</sup>C NMR** (150 MHz, Chloroform-*d*): δ 170.1, 167.7, 162.0, 153.8, 119.2, 43.4, 39.8, 29.0, 27.1, 25.8.

**HRMS** (ESI): *m/z* calcd for C<sub>15</sub>H<sub>19</sub>NNaO<sub>5</sub> [M+Na]<sup>+</sup>: 316.1155, found 316.1159.

**FT-IR** (cm<sup>-1</sup>): 1739, 1721, 1657, 1435, 1131, 870, 725, 636.

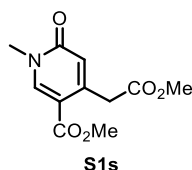

**S1s** was obtained in 82% yield as a white solid.

**m.p.:** 129.5-131.9 °C.

**TLC:** R<sub>f</sub> = 0.4 (DCM: MeOH = 100:1).

**<sup>1</sup>H NMR** (600 MHz, Chloroform-*d*): δ 8.24 (s, 1H), 3.82 (s, 2H), 3.81 (s, 3H), 3.72 (s, 3H), 3.59 (s, 3H).

**<sup>13</sup>C NMR** (150 MHz, Chloroform-*d*): δ 170.5, 164.6, 162.1, 146.4, 144.6, 121.8, 108.9, 52.0, 51.8, 40.1, 37.7.

**HRMS** (ESI): *m/z* calcd for C<sub>11</sub>H<sub>13</sub>NNaO<sub>5</sub> [M+Na]<sup>+</sup>: 262.0686, found 262.0677.

**FT-IR** (cm<sup>-1</sup>): 1736, 1667, 1461, 1346, 1139, 1054, 769, 664.

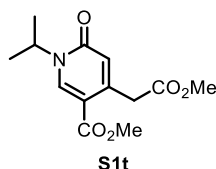

**S1t** was obtained in 51% yield as a light yellow oil.

**TLC:** R<sub>f</sub> = 0.5 (DCM: MeOH = 100:1).

**<sup>1</sup>H NMR** (600 MHz, Chloroform-*d*): δ 8.25 (s, 1H), 6.37 (s, 1H), 5.22 (quint, *J* = 6.8 Hz, 1H), 3.81 (s, 3H), 3.80 (s, 2H), 3.72 (s, 3H), 1.41 (s, 3H), 1.40 (s, 3H), 1.39 (s, 3H).

**<sup>13</sup>C NMR** (100 MHz, Chloroform-*d*):  $\delta$  170.6, 164.8, 161.4, 145.3, 139.7, 121.9, 109.2, 52.0, 51.7, 47.0, 40.1, 21.9.

**HRMS** (ESI):  $m/z$  calcd for C<sub>13</sub>H<sub>17</sub>NNaO<sub>5</sub> [M+Na]<sup>+</sup>: 290.0999, found 290.1005.

**FT-IR** (cm<sup>-1</sup>): 1716, 1659, 1460, 1297, 1160, 1038, 964, 770, 655.

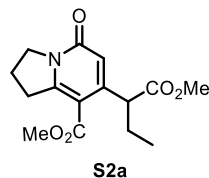

**S2a** was known compounds according to the literature.<sup>4</sup>

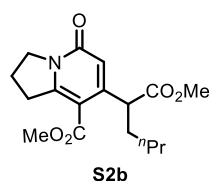

**S2b** was obtained from **S1a** in 61% yield as a saffron yellow oil.

**TLC**: R<sub>f</sub> = 0.5 (DCM: MeOH = 40:1).

**<sup>1</sup>H NMR** (600 MHz, Chloroform-*d*):  $\delta$  6.39 (s, 1H), 4.16 (td,  $J$  = 12.6, 6.6 Hz, 2H), 4.09 (t,  $J$  = 7.2 Hz, 1H), 3.83 (s, 3H), 3.66 (s, 3H), 3.47-3.36 (m, 2H), 2.21 (q,  $J$  = 7.8 Hz, 2H), 2.09-2.03 (m, 1H), 1.75-1.69 (m, 1H), 1.34-1.25 (m, 4H), 0.88 (t,  $J$  = 7.2 Hz, 3H).

**<sup>13</sup>C NMR** (100 MHz, Chloroform-*d*):  $\delta$  173.0, 166.0, 161.0, 156.1, 151.6, 117.2, 106.8, 52.0, 51.6, 49.0, 48.0, 34.3, 31.8, 29.8, 22.4, 20.6, 13.7.

**HRMS** (ESI):  $m/z$  calcd for C<sub>17</sub>H<sub>24</sub>NO<sub>5</sub> [M+H]<sup>+</sup>: 322.1649, found 322.1647.

**FT-IR** (cm<sup>-1</sup>): 1736, 1657, 1587, 1436, 1291, 1020, 865, 791.

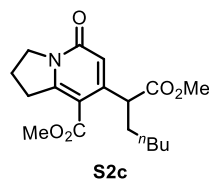

**S2c** was obtained from **S1a** in 91% yield as a brownish oil.

**TLC**: R<sub>f</sub> = 0.5 (DCM: MeOH = 40:1).

**<sup>1</sup>H NMR** (600 MHz, Chloroform-*d*):  $\delta$  6.31 (s, 1H), 4.13-4.06 (m, 2H), 4.02 (t,  $J$  = 7.2 Hz, 1H), 3.76 (s, 3H), 3.59 (s, 3H), 3.35 (td,  $J$  = 18.6, 10.8 Hz, 2H), 2.20-2.10 (m, 2H), 2.04-1.95 (m, 1H), 1.68-1.60 (m, 1H), 1.31-1.15 (m, 8H), 0.82-0.77 (m, 3H).

**<sup>13</sup>C NMR** (150 MHz, Chloroform-*d*):  $\delta$  172.9, 160.9, 156.0, 151.6, 51.9, 51.5, 48.9, 48.0, 34.2, 32.0, 31.3, 28.9, 27.5, 22.3, 20.5, 13.8.

**HRMS** (ESI):  $m/z$  calcd for C<sub>19</sub>H<sub>27</sub>NNaO<sub>5</sub> [M+Na]<sup>+</sup>: 372.1781, found 372.1778.

**FT-IR** (cm<sup>-1</sup>): 1713, 1660, 1436, 1291, 1090, 863, 791.

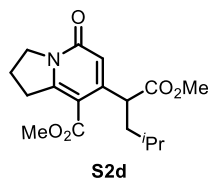

**S2d** was obtained from **S1a** in 54% yield as a yellow oil.

**TLC:**  $R_f$  = 0.6 (DCM: MeOH = 40:1).

**$^1\text{H}$  NMR** (600 MHz, Chloroform-*d*):  $\delta$  6.36 (s, 1H), 4.18 (t,  $J$  = 7.2 Hz, 1H), 4.11 (td,  $J$  = 10.8, 5.4 Hz, 2H), 3.79 (s, 3H), 3.61 (s, 3H), 3.43-3.30 (m, 2H), 2.16 (quint,  $J$  = 7.8 Hz, 2H), 1.92-1.84 (m, 1H), 1.49-1.47 (m, 2H), 0.86 (d,  $J$  = 6.6 Hz, 3H), 0.84 (d,  $J$  = 6.6 Hz, 3H).

**$^{13}\text{C}$  NMR** (100 MHz, Chloroform-*d*):  $\delta$  173.1, 166.0, 161.0, 156.0, 151.6, 117.2, 52.0, 51.6, 49.0, 45.8, 41.0, 34.2, 25.8, 22.5, 22.0, 20.6.

**HRMS** (ESI):  $m/z$  calcd for  $\text{C}_{17}\text{H}_{23}\text{NNaO}_5$   $[\text{M}+\text{Na}]^+$ : 344.1468, found 344.1471.

**FT-IR** ( $\text{cm}^{-1}$ ): 1642, 1461, 1123, 1090, 1040, 749.

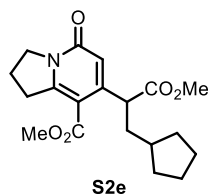

**S2e** was obtained from **S1a** in 45% yield as a colorless oil.

**TLC:**  $R_f$  = 0.5 (DCM: MeOH = 40:1).

**$^1\text{H}$  NMR** (600 MHz, Chloroform-*d*):  $\delta$  6.42 (s, 1H), 4.20-4.10 (m, 3H), 3.83 (s, 3H), 3.66 (s, 3H), 3.47-3.50 (m, 2H), 2.20 (quint,  $J$  = 7.8 Hz, 2H), 2.09-2.03 (m, 1H), 1.77-1.71 (m, 4H), 1.64-1.57 (m, 2H), 1.53-1.45 (m, 2H), 1.15-1.05 (m, 2H).

**$^{13}\text{C}$  NMR** (150 MHz, Chloroform-*d*):  $\delta$  173.1, 166.1, 161.1, 156.1, 151.7, 117.5, 106.9, 52.1, 51.7, 49.1, 47.4, 38.3, 37.9, 34.3, 32.6, 32.2, 25.0, 24.9, 20.6.

**HRMS** (ESI):  $m/z$  calcd for  $\text{C}_{19}\text{H}_{25}\text{NNaO}_5$   $[\text{M}+\text{Na}]^+$ : 370.1625, found 370.1627.

**FT-IR** ( $\text{cm}^{-1}$ ): 1714, 1659, 1436, 1289, 1090, 863.

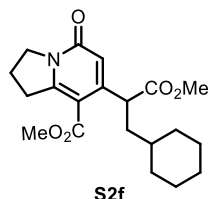

**S2f** was obtained from **S1a** in 48% yield as a colorless oil.

**TLC:**  $R_f$  = 0.6 (DCM: MeOH = 40:1).

**$^1\text{H}$  NMR** (600 MHz, Chloroform-*d*):  $\delta$  6.26 (s, 1H), 4.14 (t,  $J$  = 7.2 Hz, 1H), 4.09-4.00 (m, 2H), 3.70 (s, 3H), 3.54 (s, 3H), 3.36-3.23 (m, 2H), 2.08 (quint,  $J$  = 7.6 Hz, 2H), 1.80 (quint,  $J$  = 7.2, 1H), 1.63-1.52 (m, 4H), 1.51-1.42 (m, 2H), 1.15-0.99 (m, 4H), 0.83-0.72 (m, 2H).

**$^{13}\text{C}$  NMR** (150 MHz, Chloroform-*d*):  $\delta$  172.9, 165.7, 160.7, 155.8, 151.6, 116.7, 116.7, 106.6, 51.7, 51.4, 48.8, 44.7, 39.4, 35.0, 34.0, 32.9, 32.6, 26.1, 25.7, 25.7, 20.3.

**HRMS** (ESI):  $m/z$  calcd for  $\text{C}_{20}\text{H}_{27}\text{NNaO}_5$   $[\text{M}+\text{Na}]^+$ : 384.1781, found 384.1780.

**FT-IR** ( $\text{cm}^{-1}$ ): 1714, 1660, 1436, 1288, 1127, 862.

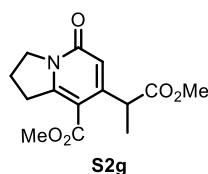

**S2g** was obtained from **S1a** in 90% yield as a colorless oil.

**TLC:**  $R_f$  = 0.5 (DCM: MeOH = 40:1).

**$^1\text{H}$  NMR** (600 MHz, Chloroform-*d*):  $\delta$  6.37 (s, 1H), 4.21 (q,  $J$  = 7.2 Hz, 1H), 4.16 (td,  $J$  = 7.2, 4.4 Hz, 2H), 3.81 (s, 3H), 3.68 (s, 3H), 3.50-3.40 (m, 2H), 2.23-2.18 (m, 2H), 1.49 (dd,  $J$  = 7.2, 3.4 Hz, 3H).

**$^{13}\text{C}$  NMR** (150 MHz, Chloroform-*d*):  $\delta$  173.6, 166.0, 161.2, 156.4, 152.8, 116.8, 106.5, 51.5, 49.0, 42.9, 20.6, 17.0, 14.5.

**HRMS** (ESI):  $m/z$  calcd for  $\text{C}_{14}\text{H}_{18}\text{NO}_5$   $[\text{M}+\text{H}]^+$ : 280.1179, found 280.1179.

**FT-IR** ( $\text{cm}^{-1}$ ): 1649, 1437, 1111, 1061, 998, 668.

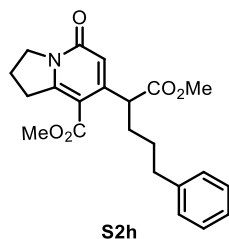

**S2h** was obtained from **S1a** in 64% yield as a saffron yellow oil.

**TLC:**  $R_f$  = 0.5 (DCM: MeOH = 40:1).

**$^1\text{H}$  NMR** (400 MHz, Chloroform-*d*):  $\delta$  7.29-7.22 (m, 2H), 7.20-7.10 (m, 3H), 6.40 (s, 1H), 4.16 (td,  $J$  = 7.4, 3.2 Hz, 2H), 4.09 (t,  $J$  = 7.2 Hz, 1H), 3.80 (s, 3H), 3.65 (s, 3H), 3.49-3.32 (m, 2H), 2.58 (t,  $J$  = 7.8 Hz, 2H), 2.19 (quint,  $J$  = 7.6 Hz, 2H), 2.13-2.03 (m, 1H), 1.84-1.71 (m, 1H), 1.67-1.54 (m, 2H), 1.41-1.30 (m, 2H).

**$^{13}\text{C}$  NMR** (150 MHz, Chloroform-*d*):  $\delta$  170.3, 164.8, 157.7, 157.6, 146.1, 118.5, 104.2, 64.8, 52.0, 49.5, 41.7, 35.0, 32.2, 32.0, 31.8, 31.6, 23.7, 20.6.

**HRMS** (ESI):  $m/z$  calcd for  $\text{C}_{23}\text{H}_{27}\text{NNaO}_5$   $[\text{M}+\text{Na}]^+$ : 420.1781, found 420.1778.

**FT-IR** ( $\text{cm}^{-1}$ ): 1736, 1658, 1436, 1291, 749, 700.

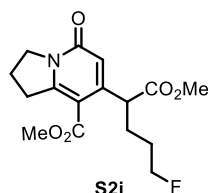

**S2i** was obtained from **S1a** in 79% yield as a yellow oil.

**TLC:**  $R_f$  = 0.5 (DCM: MeOH = 40:1).

**$^1\text{H}$  NMR** (600 MHz, Chloroform-*d*):  $\delta$  6.36 (s, 1H), 4.49 (s, 1H), 4.41 (s, 1H), 4.24-4.10 (m, 3H), 3.84 (s, 3H), 3.68 (s, 3H), 3.50-3.36 (m, 2H), 2.25-2.14 (m, 3H), 1.90-1.82 (m, 1H), 1.81-1.64 (m, 2H).

**<sup>13</sup>C NMR** (150 MHz, Chloroform-*d*):  $\delta$  172.5, 165.8, 160.9, 156.5, 151.3, 117.0, 106.5, 83.9, 82.8, 52.1, 51.6, 49.0, 47.4, 34.4, 28.5, 28.3, 28.0, 27.9, 20.5.

**<sup>19</sup>F NMR** (376 MHz, Chloroform-*d*):  $\delta$  18.37.

**HRMS** (ESI):  $m/z$  calcd for C<sub>16</sub>H<sub>20</sub>FNNaO<sub>5</sub> [M+Na]<sup>+</sup>: 348.1218, found 348.1221.

**FT-IR** (cm<sup>-1</sup>): 1736, 1659, 1519, 1437, 1293, 1211, 1095, 999, 864.

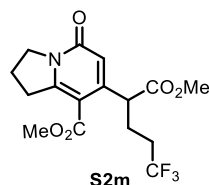

**S2m** was obtained from **S1a** in 55% yield as a yellow oil.

**TLC**:  $R_f$  = 0.4 (DCM: MeOH = 40:1).

**<sup>1</sup>H NMR** (600 MHz, Chloroform-*d*):  $\delta$  6.35 (s, 1H), 4.25-4.11 (m, 3H), 3.84 (s, 3H), 3.69 (s, 3H), 3.52-3.46 (m, 1H), 3.45-3.38 (m, 1H), 2.37-2.28 (m, 1H), 2.27-2.16 (m, 3H), 2.15-2.06 (m, 1H), 2.03-1.94 (m, 1H).

**<sup>13</sup>C NMR** (150 MHz, Chloroform-*d*):  $\delta$  172.0, 165.7, 160.8, 157.1, 150.7, 126.7 (q,  $J$  = 400.5 Hz), 117.2, 106.2, 52.3, 51.8, 49.2, 46.7, 34.7, 31.9 (q,  $J$  = 28.5 Hz), 24.5, 20.5.

**<sup>19</sup>F NMR** (376 MHz, Chloroform-*d*)  $\delta$  -66.33.

**HRMS** (ESI):  $m/z$  calcd for C<sub>16</sub>H<sub>18</sub>F<sub>3</sub>NNaO<sub>5</sub> [M+Na]<sup>+</sup>: 384.1029, found 384.1016.

**FT-IR** (cm<sup>-1</sup>): 1736, 1713, 1655, 1293, 1138, 1022, 865, 653.

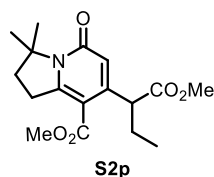

**S2p** was obtained from **S1p** in 80% yield as a light yellow oil.

**TLC**:  $R_f$  = 0.7 (DCM: MeOH = 40:1).

**<sup>1</sup>H NMR** (400 MHz, Chloroform-*d*):  $\delta$  6.29 (s, 1H), 3.93 (t,  $J$  = 7.2 Hz, 1H), 3.83 (s, 3H), 3.68 (s, 3H), 3.35-3.18 (m, 2H), 2.10 (dd,  $J$  = 14.4, 7.0 Hz, 1H), 2.03 (d,  $J$  = 7.8 Hz, 2H), 1.76 (dd,  $J$  = 14.2, 7.2 Hz, 1H), 1.69 (s, 3H), 1.67 (s, 3H), 0.94 (t,  $J$  = 7.4 Hz, 3H).

**<sup>13</sup>C NMR** (100 MHz, Chloroform-*d*):  $\delta$  172.9, 166.3, 161.5, 155.8, 150.2, 118.7, 106.5, 69.1, 51.9, 51.5, 49.4, 37.2, 30.4, 25.5, 25.3, 25.2, 12.3.

**HRMS** (ESI):  $m/z$  calcd for C<sub>17</sub>H<sub>24</sub>NO<sub>5</sub> [M+H]<sup>+</sup>: 322.1649, found 322.1642.

**FT-IR** (cm<sup>-1</sup>): 1713, 1659, 1519, 1437, 1293, 1133, 999, 864.

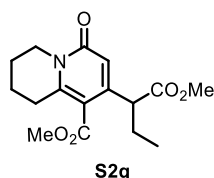

**S2q** was obtained from **S1q** in 75% yield as a light yellow oil.

**TLC**:  $R_f$  = 0.5 (DCM: MeOH = 40:1).

**<sup>1</sup>H NMR** (600 MHz, Chloroform-*d*): δ 6.47 (s, 1H), 4.35 (t, *J* = 7.2 Hz, 1H), 4.01 (t, *J* = 6.6 Hz, 2H), 3.86 (s, 1H), 3.67 (s, 3H), 3.48 (dt, *J* = 20.4, 7.4 Hz, 1H), 2.92-2.80 (m, 2H), 2.04 (hept, *J* = 7.8 Hz, 1H), 1.99-1.91 (m, 2H), 1.85-1.72 (m, 3H), 1.37 (t, *J* = 7.2 Hz, 2H), 0.92 (t, *J* = 7.4 Hz, 3H).  
**<sup>13</sup>C NMR** (150 MHz, Chloroform-*d*): δ 172.4, 167.5, 167.1, 162.3, 148.3, 147.9, 147.8, 115.4, 115.2, 112.8, 112.3, 61.5, 52.2, 49.7, 49.4, 41.9, 26.9, 25.6, 25.3, 21.4, 18.3, 14.0, 12.2.  
**HRMS** (ESI): *m/z* calcd for C<sub>16</sub>H<sub>21</sub>NNaO<sub>5</sub> [M+Na]<sup>+</sup>: 330.1312, found 330.1315.  
**FT-IR** (cm<sup>-1</sup>): 1737, 1656, 1517, 1435, 1290, 1140, 859, 789, 651.

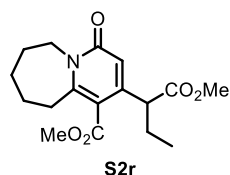

**S2r** was obtained from **S1r** in 64% yield as a light yellow oil.

**TLC**: R<sub>f</sub> = 0.5 (DCM: MeOH = 40:1)

**<sup>1</sup>H NMR** (400 MHz, Chloroform-*d*): δ 6.47 (s, 1H), 4.48-4.39 (m, 1H), 4.36-4.31 (m, 1H), 3.85 (s, 3H), 3.68 (s, 3H), 3.38 (t, *J* = 6.8 Hz, 3H 1H), 2.85-2.77 (m, 2H), 2.07-1.97 (m, 1H), 1.82-1.74 (m, 7H), 0.92 (t, *J* = 7.4 Hz, 3H).

**<sup>13</sup>C NMR** (150 MHz, Chloroform-*d*): δ 172.3, 168.0, 162.2, 151.6, 147.6, 116.2, 113.1, 108.1, 52.3, 52.2, 49.6, 43.4, 31.7, 29.0, 27.1, 25.9, 25.5, 12.2.

**HRMS** (ESI): *m/z* calcd for C<sub>17</sub>H<sub>23</sub>NNaO<sub>5</sub> [M+Na]<sup>+</sup>: 344.1468, found 344.1478.

**FT-IR** (cm<sup>-1</sup>): 1736, 1659, 1589, 1526, 1437, 1297, 1131, 997, 862.

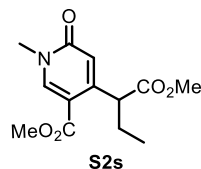

**S2s** was obtained from **S1s** in 48% yield as a saffron yellow oil.

**TLC**: R<sub>f</sub> = 0.7 (DCM: MeOH = 100:1).

**<sup>1</sup>H NMR** (400 MHz, Chloroform-*d*): δ 8.24 (s, 1H), 6.50 (s, 1H), 4.31 (t, *J* = 7.2 Hz, 1H), 3.83 (s, 3H), 3.68 (s, 3H), 3.59 (s, 3H), 2.09 (hept, *J* = 7.2, 1H), 1.79 (hept, *J* = 7.6, 1H), 0.95 (t, *J* = 7.4 Hz, 3H).

**<sup>13</sup>C NMR** (100 MHz, Chloroform-*d*): δ 172.8, 164.6, 162.3, 151.4, 144.8, 119.2, 108.7, 52.0, 51.8, 48.9, 37.7, 25.1, 12.3.

**HRMS** (ESI): *m/z* calcd for C<sub>13</sub>H<sub>17</sub>NNaO<sub>5</sub> [M+Na]<sup>+</sup>: 290.0999, found 290.0999.

**FT-IR** (cm<sup>-1</sup>): 1720, 1667, 1453, 1293, 1138, 1053, 776, 664.

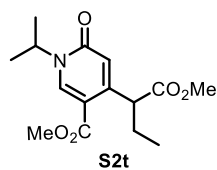

**S2t** was obtained from **S1t** in 41% yield as a pale yellow oil.

**TLC:**  $R_f$  = 0.7 (DCM: MeOH = 100:1).

**$^1\text{H}$  NMR** (600 MHz, Chloroform-*d*):  $\delta$  8.24 (s, 1H), 6.48 (s, 1H), 5.21 (quint,  $J$  = 6.8 Hz, 1H), 4.33-4.26 (m, 1H), 3.84 (s, 3H), 3.68 (s, 3H), 2.09 (hept,  $J$  = 7.2 Hz, 1H), 1.78 (hept,  $J$  = 6.6 Hz, 1H), 1.41 (d,  $J$  = 2.4 Hz, 3H), 1.40 (d,  $J$  = 2.4 Hz, 3H), 0.96 (t,  $J$  = 7.4 Hz, 3H).

**$^{13}\text{C}$  NMR** (150 MHz, Chloroform-*d*):  $\delta$  173.0, 164.9, 161.6, 150.3, 139.9, 119.3, 109.0, 52.0, 51.9, 49.0, 47.1, 25.2, 21.9, 21.9, 12.4.

**HRMS** (ESI):  $m/z$  calcd for  $\text{C}_{15}\text{H}_{21}\text{NNaO}_5$   $[\text{M}+\text{Na}]^+$ : 318.1312, found 318.1307.

**FT-IR** ( $\text{cm}^{-1}$ ): 1720, 1666, 1521, 1455, 1297, 1195, 1046, 871, 774.

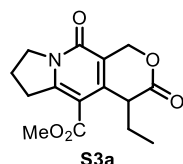

**S3a** was known compounds according to the literature.<sup>4</sup>

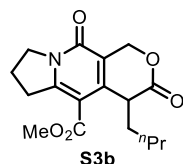

**S3b** was obtained from **S2b** in 76% yield as a colorless oil.

**TLC:**  $R_f$  = 0.6 (DCM: MeOH = 40:1).

**$^1\text{H}$  NMR** (600 MHz, Chloroform-*d*):  $\delta$  5.50 (d,  $J$  = 15.6 Hz, 1H), 5.15 (d,  $J$  = 15.6 Hz, 1H), 4.42 (dd,  $J$  = 9.6, 5.4 Hz, 1H), 4.24-4.15 (m, 2H), 3.87 (s, 3H), 3.55-3.44 (m, 2H), 2.30-2.21 (m, 2H), 1.90-1.84 (m, 1H), 1.78-1.72 (m, 1H), 1.49-1.44 (m, 2H), 1.42-1.36 (m, 1H), 1.35-1.29 (m, 1H), 0.90 (t,  $J$  = 7.2 Hz, 3H).

**$^{13}\text{C}$  NMR** (150 MHz, Chloroform-*d*):  $\delta$  171.4, 165.1, 157.9, 156.9, 147.5, 118.4, 104.7, 64.8, 51.9, 49.3, 43.0, 34.7, 31.3, 29.2, 22.2, 20.6, 13.7.

**HRMS** (ESI):  $m/z$  calcd for  $\text{C}_{17}\text{H}_{21}\text{NNaO}_5$   $[\text{M}+\text{Na}]^+$ : 342.1312, found 342.1309.

**FT-IR** ( $\text{cm}^{-1}$ ): 1635, 1417, 1308, 1122, 664.

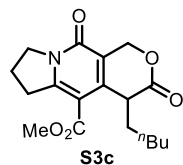

**S3c** was obtained from **S2c** in 64% yield as a saffron yellow oil.

**TLC:**  $R_f$  = 0.6 (DCM: MeOH = 40:1).

**$^1\text{H}$  NMR** (600 MHz, Chloroform-*d*):  $\delta$  5.33 (d,  $J$  = 15.6 Hz, 1H), 5.01 (d,  $J$  = 15.6 Hz, 1H), 4.29 (dd,  $J$  = 9.0, 4.8 Hz, 1H), 4.12-4.03 (m, 2H), 3.75 (s, 3H), 3.46-3.30 (m, 2H), 2.18-2.07 (m, 2H), 1.78-1.68 (m, 1H), 1.66-1.57 (m, 1H), 1.38-1.29 (m, 2H), 1.26-1.20 (m, 1H), 1.19-1.09 (m, 5H), 0.74 (t,  $J$  = 6.8 Hz, 3H).

**<sup>13</sup>C NMR** (150 MHz, Chloroform-*d*):  $\delta$  171.3, 165.0, 157.8, 157.0, 147.4, 118.1, 104.6, 64.7, 51.8, 49.3, 42.9, 34.7, 31.5, 31.4, 28.7, 27.0, 22.4, 20.6, 13.9.

**HRMS** (ESI):  $m/z$  calcd for C<sub>19</sub>H<sub>25</sub>NNaO<sub>5</sub> [M+Na]<sup>+</sup>: 370.1625, found 370.1616.

**FT-IR** (cm<sup>-1</sup>): 1714, 1650, 1306, 1113, 788.

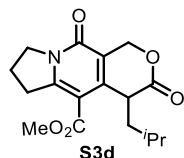

**S3d** was obtained from **S2d** in 65% yield as a white solid.

**m.p.**: 232.9-235.8 °C.

**TLC**: R<sub>f</sub> = 0.7 (DCM: MeOH = 40:1).

**<sup>1</sup>H NMR** (400 MHz, Chloroform-*d*):  $\delta$  5.47 (d,  $J$  = 15.6 Hz, 1H), 5.12 (d,  $J$  = 15.6 Hz, 1H), 4.50 (dd,  $J$  = 11.6, 4.8 Hz, 1H), 4.23-4.06 (m, 2H), 3.83 (s, 1H), 3.57-3.35 (m, 2H), 2.30-2.11 (m, 2H), 1.83-1.63 (m, 2H), 1.54-1.42 (m, 1H), 1.05 (d,  $J$  = 6.4 Hz, 3H), 0.89 (d,  $J$  = 6.6 Hz, 3H).

**<sup>13</sup>C NMR** (100 MHz, Chloroform-*d*):  $\delta$  171.0, 164.9, 157.8, 157.0, 147.8, 118.4, 104.6, 64.5, 51.8, 49.3, 41.5, 39.4, 34.6, 26.0, 23.2, 21.0, 20.6.

**HRMS** (ESI):  $m/z$  calcd for C<sub>17</sub>H<sub>21</sub>NNaO<sub>5</sub> [M+Na]<sup>+</sup>: 342.1312, found 342.1315.

**FT-IR** (cm<sup>-1</sup>): 1645, 1437, 1308, 1116, 763, 636.

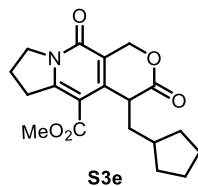

**S3e** was obtained from **S2e** in 65% yield as a yellow solid.

**m.p.**: 113.2-115.1 °C.

**TLC**: R<sub>f</sub> = 0.6 (DCM: MeOH = 40:1).

**<sup>1</sup>H NMR** (600 MHz, Chloroform-*d*):  $\delta$  5.52 (d,  $J$  = 15.6 Hz, 1H), 5.17 (d,  $J$  = 15.6 Hz, 1H), 4.48 (dd,  $J$  = 11.4, 4.8 Hz, 1H), 4.28-4.15 (m, 2H), 3.87 (s, 3H), 3.60-3.41 (m, 2H), 2.28-2.17 (m, 2H), 2.07-2.00 (m, 1H), 1.98-1.91 (m, 1H), 1.92-1.83 (m, 1H), 1.82-1.75 (m, 1H), 1.70-1.55 (m, 5H), 1.28-1.24 (m, 1H), 1.17-1.06 (m, 1H).

**<sup>13</sup>C NMR** (150 MHz, Chloroform-*d*):  $\delta$  171.3, 165.1, 158.0, 156.9, 148.0, 118.6, 104.9, 51.9, 49.4, 42.9, 37.8, 37.0, 34.7, 33.0, 31.8, 25.1, 25.0, 20.7.

**HRMS** (ESI):  $m/z$  calcd for C<sub>19</sub>H<sub>23</sub>NNaO<sub>5</sub> [M+Na]<sup>+</sup>: 368.1468, found 368.1466.

**FT-IR** (cm<sup>-1</sup>): 1740, 1649, 1545, 1307, 1125, 734, 627.

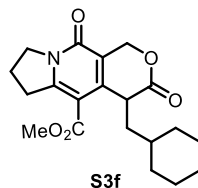

**S3f** was obtained from **S2f** in 71% yield as a colorless oil.

**TLC:**  $R_f$  = 0.7 (DCM: MeOH = 40:1).

**$^1\text{H}$  NMR** (600 MHz, Chloroform-*d*):  $\delta$  5.49 (d,  $J$  = 15.6 Hz, 1H), 5.16 (d,  $J$  = 15.6 Hz, 1H), 4.58 (dd,  $J$  = 11.2, 4.8 Hz, 1H), 4.27-4.13 (m, 2H), 3.88 (s, 3H), 3.57-3.50 (m, 1H), 3.50-3.42 (m, 1H), 2.31-2.18 (m, 2H), 2.13 (d,  $J$  = 12.6 Hz, 1H), 1.74 (d,  $J$  = 12.6 Hz, 1H), 1.71-1.54 (m, 5H), 1.45 (qd,  $J$  = 10.8, 3.6 Hz, 1H), 1.34-1.21 (m, 2H), 1.19-1.10 (m, 1H), 0.99-0.89 (m, 2H).

**$^{13}\text{C}$  NMR** (150 MHz, Chloroform-*d*):  $\delta$  171.0, 164.8, 156.9, 147.9, 118.3, 64.3, 51.7, 49.2, 40.6, 38.1, 35.0, 34.6, 33.7, 31.7, 26.1, 25.9, 25.7, 20.5.

**HRMS** (ESI):  $m/z$  calcd for  $\text{C}_{20}\text{H}_{25}\text{NNaO}_5$   $[\text{M}+\text{Na}]^+$ : 382.1625, found 382.1614.

**FT-IR** ( $\text{cm}^{-1}$ ): 1713, 1650, 1307, 1080, 793, 734.

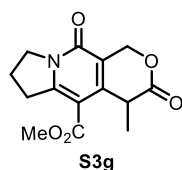

**S3g** was obtained from **S2g** in 76% yield as a white solid.

**m.p.:** 151.2-152.9 °C.

**TLC:**  $R_f$  = 0.7 (DCM: MeOH = 40:1).

**$^1\text{H}$  NMR** (400 MHz, Chloroform-*d*):  $\delta$  5.53 (d,  $J$  = 15.6 Hz, 1H), 5.15 (d,  $J$  = 15.6 Hz, 1H), 4.46 (q,  $J$  = 7.4 Hz, 1H), 4.27-4.16 (m, 2H), 3.88 (s, 3H), 3.60-3.42 (m, 2H), 2.31-2.20 (m, 2H), 1.55 (dd,  $J$  = 7.4, 3.2 Hz, 3H).

**$^{13}\text{C}$  NMR** (100 MHz, Chloroform-*d*):  $\delta$  157.1, 118.0, 104.5, 64.4, 51.9, 49.5, 37.8, 34.7, 20.5, 16.9.

**HRMS** (ESI):  $m/z$  calcd for  $\text{C}_{14}\text{H}_{16}\text{NO}_5$   $[\text{M}+\text{H}]^+$ : 278.1023, found 278.1024.

**FT-IR** ( $\text{cm}^{-1}$ ): 1711, 1642, 1311, 1138, 1047, 630.

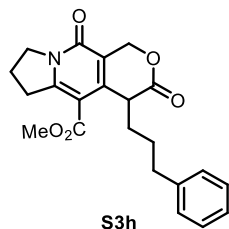

**S3h** was obtained from **S2h** in 72% yield as a light yellow oil.

**TLC:**  $R_f$  = 0.6 (DCM: MeOH = 40:1).

**$^1\text{H}$  NMR** (600 MHz, Chloroform-*d*):  $\delta$  7.26 (t,  $J$  = 7.2 Hz, 2H), 7.15 (t,  $J$  = 5.6 Hz, 3H), 5.49 (d,  $J$  = 15.6 Hz, 1H), 5.12 (d,  $J$  = 15.6 Hz, 1H), 4.42 (dd,  $J$  = 9.6, 5.0 Hz, 1H), 4.28-4.11 (m, 2H), 3.82 (s, 3H), 3.59-3.41 (m, 2H), 2.61 (t,  $J$  = 7.8 Hz, 2H), 2.33-2.15 (m, 2H), 1.92-1.83 (m, 1H), 1.80-1.73 (m, 1H), 1.68 (dt,  $J$  = 14.6, 7.2 Hz, 1H), 1.61-1.57 (m, 1H), 1.58-1.47 (m, 2H).

**$^{13}\text{C}$  NMR** (100 MHz, Chloroform-*d*):  $\delta$  171.2, 165.0, 157.8, 156.9, 147.3, 142.0, 128.2, 128.2, 125.6, 118.3, 104.6, 64.7, 51.8, 49.3, 42.9, 35.5, 34.7, 31.3, 30.9, 26.7, 20.5.

**HRMS** (ESI):  $m/z$  calcd for  $\text{C}_{23}\text{H}_{25}\text{NNaO}_5$   $[\text{M}+\text{Na}]^+$ : 418.1625, found 418.1620.

**FT-IR** ( $\text{cm}^{-1}$ ): 1709, 1646, 1437, 1307, 1090, 750, 701.

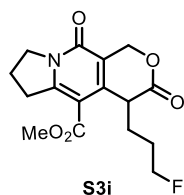

**S3i** was obtained from **S2i** in 79% yield as a yellow oil.

**TLC:**  $R_f$  = 0.6 (DCM: MeOH = 40:1).

**$^1\text{H}$  NMR** (600 MHz, Chloroform-*d*):  $\delta$  5.53 (d,  $J$  = 15.8 Hz, 1H), 5.17 (d,  $J$  = 15.8 Hz, 1H), 4.62-4.44 (m, 3H), 4.27-4.16 (m, 2H), 3.88 (s, 3H), 3.63-3.51 (m, 1H), 3.51-3.43 (m, 1H), 2.34-2.22 (m, 2H), 2.06-1.84 (m, 4H).

**$^{13}\text{C}$  NMR** (150 MHz, Chloroform-*d*):  $\delta$  171.0, 165.0, 157.8, 157.3, 147.0, 118.4, 104.5, 83.3, 82.2, 64.8, 52.0, 49.4, 42.3, 34.8, 28.2, 28.0, 27.1, 27.1, 20.6.

**$^{19}\text{F}$  NMR** (376 MHz, Chloroform-*d*):  $\delta$  16.69.

**HRMS** (ESI):  $m/z$  calcd for  $\text{C}_{16}\text{H}_{18}\text{FNNaO}_5$   $[\text{M}+\text{Na}]^+$ : 346.1061, found 346.1062.

**FT-IR** ( $\text{cm}^{-1}$ ): 1713, 1657, 1438, 1293, 1133, 999, 864, 792.

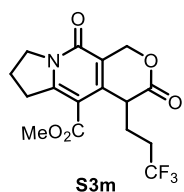

**S3m** was obtained from **S2m** in 77% yield as a saffron yellow oil.

**TLC:**  $R_f$  = 0.6 (DCM: MeOH = 40:1).

**$^1\text{H}$  NMR** (600 MHz, Chloroform-*d*):  $\delta$  5.54 (d,  $J$  = 16.2 Hz, 1H), 5.17 (d,  $J$  = 16.2 Hz, 1H), 4.38 (dd,  $J$  = 10.8, 4.2 Hz, 1H), 4.28-4.22 (m, 1H), 4.20-4.13 (m, 1H), 3.88 (s, 3H), 3.62-3.54 (m, 1H), 3.52-3.42 (m, 1H), 2.47-2.37 (m, 2H), 2.30-2.21 (m, 2H), 2.17-2.10 (m, 1H), 1.93 (qd,  $J$  = 11.6, 5.4 Hz, 1H).

**$^{13}\text{C}$  NMR** (150 MHz, Chloroform-*d*):  $\delta$  170.3, 164.8, 157.7, 157.6, 146.1, 125.7 (d,  $J$  = 226.5 Hz), 118.5, 104.2, 64.8, 52.0, 49.5, 41.7, 35.0, 31.9 (q,  $J$  = 30.0 Hz), 23.7, 20.6.

**$^{19}\text{F}$  NMR** (376 MHz, Chloroform-*d*):  $\delta$  -66.57.

**HRMS** (ESI):  $m/z$  calcd for  $\text{C}_{16}\text{H}_{16}\text{F}_3\text{NNaO}_5$   $[\text{M}+\text{Na}]^+$ : 382.0873, found 382.0873.

**FT-IR** ( $\text{cm}^{-1}$ ): 1649, 1440, 1308, 1126, 979, 636.

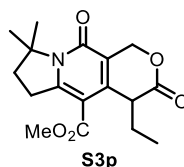

**S3p** was obtained from **S2p** in 80% yield as a colorless oil.

**TLC:**  $R_f$  = 0.7 (DCM: MeOH = 60:1).

**$^1\text{H}$  NMR** (600 MHz, Chloroform-*d*):  $\delta$  5.48 (d,  $J$  = 15.8 Hz, 1H), 5.13 (d,  $J$  = 15.8 Hz, 1H), 4.25 (dd,  $J$  = 9.6, 4.8 Hz, 1H), 3.86 (s, 3H), 3.42-3.26 (m, 2H), 2.07 (t,  $J$  = 7.8 Hz, 2H), 1.96 (td,  $J$  = 13.2, 7.2 Hz, 1H), 1.80 (td,  $J$  = 14.4, 7.8 Hz, 1H), 1.71 (s, 3H), 1.68 (s, 3H), 1.09 (t,  $J$  = 7.4 Hz, 3H).

**<sup>13</sup>C NMR** (150 MHz, Chloroform-*d*):  $\delta$  171.4, 165.4, 158.4, 156.7, 146.3, 119.5, 104.6, 69.9, 65.0, 51.9, 44.1, 37.2, 30.8, 25.8, 25.4, 25.2, 11.8.

**HRMS** (ESI):  $m/z$  calcd for C<sub>17</sub>H<sub>21</sub>NNaO<sub>5</sub> [M+Na]<sup>+</sup>: 342.1312, found 342.1312.

**FT-IR** (cm<sup>-1</sup>): 1711, 1650, 1543. 1438, 1303, 1191, 794, 730.

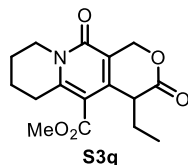

**S3q** was obtained from **S2q** in 65% yield as a light yellow oil.

**TLC**:  $R_f$  = 0.6 (DCM: MeOH = 40:1).

**<sup>1</sup>H NMR** (600 MHz, Chloroform-*d*):  $\delta$  5.49 (d,  $J$  = 17.6 Hz, 1H), 5.17 (d,  $J$  = 17.6 Hz, 1H), 4.40-4.31 (m, 1H), 4.15-4.07 (m, 1H), 4.07-4.00 (m, 1H), 3.75-3.70 (m, 1H), 2.95 (t,  $J$  = 6.6 Hz, 2H), 2.04-1.93 (m, 3H), 1.87-1.74 (m, 3H), 1.39 (t,  $J$  = 7.2 Hz, 2H), 1.05 (td,  $J$  = 7.4, 2.8 Hz, 3H).

**<sup>13</sup>C NMR** (150 MHz, Chloroform-*d*):  $\delta$  170.7, 165.8, 158.8, 149.5, 143.5, 116.8, 109.9, 65.7, 61.7, 52.4, 44.0, 42.0, 27.0, 25.4, 21.2, 14.1.

**HRMS** (ESI):  $m/z$  calcd for C<sub>16</sub>H<sub>19</sub>NNaO<sub>5</sub> [M+Na]<sup>+</sup>: 328.1155, found 328.1158.

**FT-IR** (cm<sup>-1</sup>): 1717, 1651, 1537, 1299, 1170, 1048, 786, 732, 580.

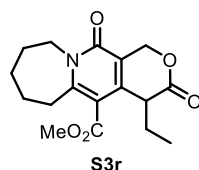

**S3r** was obtained from **S2r** in 69% yield as a colorless oil.

**TLC**:  $R_f$  = 0.6 (DCM: MeOH = 40:1).

**<sup>1</sup>H NMR** (600 MHz, Chloroform-*d*):  $\delta$  5.46 (d,  $J$  = 16.0 Hz, 1H), 5.15 (d,  $J$  = 16.0 Hz, 1H), 4.55 (dd,  $J$  = 14.6, 7.2 Hz, 1H), 4.31 (dd,  $J$  = 14.4, 8.4 Hz, 1H), 3.88 (s, 3H), 3.60 (dd,  $J$  = 9.0, 4.8 Hz, 1H), 2.96-2.89 (m, 1H), 2.89-2.80 (m, 1H), 2.02-1.93 (m, 1H), 1.88-1.72 (m, 7H), 1.05 (td,  $J$  = 7.4, 2.2 Hz, 3H).

**<sup>13</sup>C NMR** (150 MHz, Chloroform-*d*):  $\delta$  170.6, 166.8, 158.7, 152.9, 143.2, 117.7, 110.3, 66.0, 52.5, 43.9, 43.5, 31.6, 28.8, 27.0, 25.8, 25.5, 11.5.

**HRMS** (ESI):  $m/z$  calcd for C<sub>17</sub>H<sub>23</sub>NNaO<sub>5</sub> [M+Na]<sup>+</sup>: 344.1468, found 344.1478.

**FT-IR** (cm<sup>-1</sup>): 1722, 1654, 1545, 1438, 1301, 1168, 906, 795, 732.

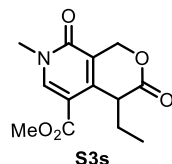

**S3s** was obtained from **S2s** in 37% yield as a white solid.

**m.p.**: 167.2-168.5 °C.

**TLC**:  $R_f$  = 0.8 (DCM: MeOH = 100:1).

**<sup>1</sup>H NMR** (600 MHz, Chloroform-*d*):  $\delta$  8.29 (s, 1H), 5.48 (d, *J* = 16.2 Hz, 1H), 5.16 (d, *J* = 16.2 Hz, 1H), 4.57 (dd, *J* = 9.0, 5.4 Hz, 1H), 3.86 (s, 3H), 3.63 (s, 3H), 1.99-1.93 (m, 1H), 1.87-1.80 (m, 1H), 1.64 (s, 1H), 1.09 (t, *J* = 7.4 Hz, 3H).

**<sup>13</sup>C NMR** (150 MHz, Chloroform-*d*):  $\delta$  170.7, 163.9, 159.1, 146.6, 144.6, 120.6, 106.9, 65.3, 52.1, 43.0, 37.9, 25.6, 11.6.

**HRMS** (ESI): *m/z* calcd for C<sub>13</sub>H<sub>15</sub>NNaO<sub>5</sub> [M+Na]<sup>+</sup>: 288.0842, found 288.0836.

**FT-IR** (cm<sup>-1</sup>): 1714, 1657, 1310, 1017, 856, 660.

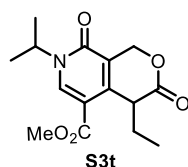

**S3t** was obtained from **S2t** in 38% yield as a white solid.

**m.p.:** 110.4-112.7 °C.

**TLC:** R<sub>f</sub> = 0.8 (DCM: MeOH = 100:1).

**<sup>1</sup>H NMR** (600 MHz, Chloroform-*d*):  $\delta$  8.30 (s, 1H), 5.49 (d, *J* = 16.2 Hz, 1H), 5.24 (quint, *J* = 6.8 Hz, 1H), 5.16 (d, *J* = 16.2 Hz, 1H), 4.56 (dd, *J* = 9.0, 4.8 Hz, 1H), 3.88 (s, 3H), 2.00-1.94 (m, 1H), 1.87-1.79 (m, 1H), 1.43 (d, *J* = 4.2 Hz, 3H), 1.42 (d, *J* = 4.2 Hz, 3H), 1.10 (t, *J* = 7.4 Hz, 3H).

**<sup>13</sup>C NMR** (150 MHz, Chloroform-*d*):  $\delta$  170.9, 164.1, 158.4, 145.7, 139.7, 120.5, 107.2, 65.5, 52.1, 47.7, 43.0, 25.6, 21.9, 21.8, 11.7.

**HRMS** (ESI): *m/z* calcd for C<sub>15</sub>H<sub>19</sub>NNaO<sub>5</sub> [M+Na]<sup>+</sup>: 316.1155, found 316.1166.

**FT-IR** (cm<sup>-1</sup>): 1720, 1657, 1455, 1260, 1089, 1018, 798, 661.

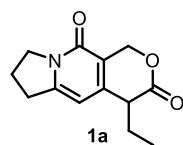

**1a** was known compounds according to the literature.<sup>4</sup>

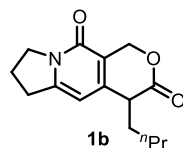

**1b** was obtained from **S3b** in 54% yield as a yellow oil.

**TLC:** R<sub>f</sub> = 0.4 (DCM: MeOH = 30:1).

**<sup>1</sup>H NMR** (600 MHz, Chloroform-*d*):  $\delta$  6.00 (s, 1H), 5.42 (d, *J* = 15.6 Hz, 1H), 5.23 (d, *J* = 15.6 Hz, 1H), 4.15 (t, *J* = 7.2 Hz, 2H), 3.42 (t, *J* = 6.8 Hz, 1H), 3.12 (t, *J* = 7.8 Hz, 2H), 2.24 (quint, *J* = 7.6 Hz, 2H), 1.89-1.82 (m, 2H), 1.47-1.32 (m, 4H), 0.90 (t, *J* = 7.0 Hz, 3H).

**<sup>13</sup>C NMR** (150 MHz, Chloroform-*d*):  $\delta$  171.4, 158.3, 150.4, 146.9, 116.9, 100.1, 65.9, 48.5, 44.6, 31.7, 31.3, 28.8, 22.3, 21.3, 13.7.

**HRMS** (ESI): *m/z* calcd for C<sub>15</sub>H<sub>19</sub>NNaO<sub>3</sub> [M+Na]<sup>+</sup>: 284.1257, found 284.1253.

**FT-IR** (cm<sup>-1</sup>): 1740, 1653, 1574, 1233, 1072, 733.

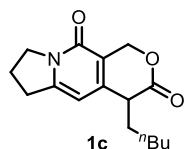

**1c** was obtained from **S3c** in 58% yield as a pale yellow solid.

**m.p.:** 77.9-79.2 °C.

**TLC:**  $R_f$  = 0.4 (DCM: MeOH = 30:1).

**$^1\text{H}$  NMR** (600 MHz, Chloroform-*d*):  $\delta$  6.00 (s, 1H), 5.39 (d,  $J$  = 15.6 Hz, 1H), 5.20 (d,  $J$  = 15.6 Hz, 1H), 4.12 (t,  $J$  = 7.4 Hz, 2H), 3.39 (t,  $J$  = 6.6 Hz, 1H), 3.09 (t,  $J$  = 7.8 Hz, 2H), 2.25-2.17 (m, 2H), 1.88-1.81 (m, 2H), 1.40-1.31 (m, 2H), 1.30-1.20 (m, 6H), 0.84 (t,  $J$  = 6.6 Hz, 3H).

**$^{13}\text{C}$  NMR** (150 MHz, Chloroform-*d*):  $\delta$  171.5, 150.4, 146.9, 100.1, 65.9, 48.5, 44.6, 31.7, 31.6, 31.4, 28.9, 26.6, 22.4, 21.3, 13.9.

**HRMS** (ESI):  $m/z$  calcd for  $\text{C}_{17}\text{H}_{23}\text{NNaO}_3$   $[\text{M}+\text{Na}]^+$ : 312.1570, found 312.1566.

**FT-IR** ( $\text{cm}^{-1}$ ): 1655, 1579, 1460, 1121, 1040, 858, 669.

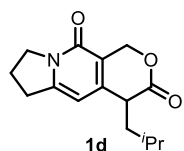

**1d** was obtained from **S3d** in 44% yield as a light yellow oil.

**TLC:**  $R_f$  = 0.4 (DCM: MeOH = 30:1).

**$^1\text{H}$  NMR** (600 MHz, Chloroform-*d*):  $\delta$  5.96 (s, 1H), 5.43 (d,  $J$  = 15.6 Hz, 1H), 5.20 (d,  $J$  = 15.6 Hz, 1H), 4.12 (t,  $J$  = 7.2 Hz, 2H), 3.46 (t,  $J$  = 7.4 Hz, 1H), 3.09 (t,  $J$  = 7.8 Hz, 2H), 2.21 (quint,  $J$  = 7.6 Hz, 2H), 1.78-1.66 (m, 2H), 1.57-1.49 (m, 1H), 0.96 (t,  $J$  = 6.0 Hz, 6H).

**$^{13}\text{C}$  NMR** (150 MHz, Chloroform-*d*):  $\delta$  171.5, 150.6, 147.6, 117.0, 100.1, 65.6, 48.6, 43.2, 40.1, 31.7, 25.5, 22.3, 22.1, 21.3.

**HRMS** (ESI):  $m/z$  calcd for  $\text{C}_{15}\text{H}_{19}\text{NNaO}_3$   $[\text{M}+\text{Na}]^+$ : 284.1257, found 284.1253.

**FT-IR** ( $\text{cm}^{-1}$ ): 1734, 1653, 1576, 1465, 1074, 750, 669.

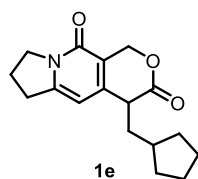

**1e** was obtained from **S3e** in 43% yield as a saffron yellow solid.

**m.p.:** 110.1-111.5 °C.

**TLC:**  $R_f$  = 0.4 (DCM: MeOH = 30:1).

**$^1\text{H}$  NMR** (600 MHz, Chloroform-*d*):  $\delta$  5.99 (s, 1H), 5.46 (d,  $J$  = 15.6 Hz, 1H), 5.22 (d,  $J$  = 15.6 Hz, 1H), 4.15 (t,  $J$  = 7.2 Hz, 1H), 3.44 (t,  $J$  = 7.2 Hz, 1H), 3.11 (t,  $J$  = 7.8 Hz, 2H), 2.24 (q,  $J$  = 7.6 Hz, 2H), 1.94-1.87 (m, 3H), 1.86-1.75 (m, 2H), 1.86-1.76 (m, 2H), 1.75-1.71 (m, 1H), 1.66-1.61 (m, 2H), 1.58-1.51 (m, 2H), 1.19-1.11 (m, 2H).

**$^{13}\text{C}$  NMR** (100 MHz, Chloroform-*d*):  $\delta$  171.6, 158.5, 150.5, 147.5, 116.9, 100.2, 65.7, 48.6, 44.6, 37.7, 37.2, 32.6, 32.4, 31.7, 25.1, 25.1, 21.4.

**HRMS** (ESI):  $m/z$  calcd for  $\text{C}_{17}\text{H}_{21}\text{NNaO}_3$   $[\text{M}+\text{Na}]^+$ : 310.1414, found 310.1402.

**FT-IR** (cm<sup>-1</sup>): 1640, 1462, 1121, 1039, 662.

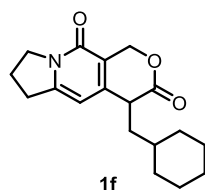

**1f** was obtained from **S3f** in 51% yield as a white foam.

**TLC**:  $R_f$  = 0.4 (DCM: MeOH = 30:1).

**<sup>1</sup>H NMR** (400 MHz, Chloroform-*d*):  $\delta$  5.95 (s, 1H), 5.43 (d,  $J$  = 15.6 Hz, 1H), 5.21 (d,  $J$  = 15.6 Hz, 1H), 4.13 (t,  $J$  = 7.2 Hz, 2H), 3.50 (t,  $J$  = 7.6 Hz, 1H), 3.10 (t,  $J$  = 7.8 Hz, 2H), 2.22 (quint,  $J$  = 7.6 Hz, 2H), 1.82 (d,  $J$  = 10.8 Hz, 1H), 1.77-1.62 (m, 5H), 1.59-1.49 (m, 1H), 1.45-1.32 (m, 1H), 1.30-1.09 (m, 3H), 1.01-0.84 (m, 2H).

**<sup>13</sup>C NMR** (100 MHz, Chloroform-*d*):  $\delta$  171.6, 158.5, 150.6, 147.8, 117.0, 100.1, 65.6, 48.6, 42.4, 38.6, 34.7, 33.1, 32.8, 31.7, 26.2, 25.9, 25.8, 21.3.

**HRMS** (ESI):  $m/z$  calcd for C<sub>18</sub>H<sub>23</sub>NNaO<sub>3</sub> [M+Na]<sup>+</sup>: 324.1570, found 324.1581.

**FT-IR** (cm<sup>-1</sup>): 1740, 1647, 1576, 1448, 1074, 669.

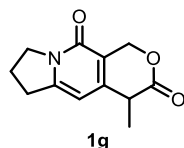

**1g** was obtained from **S3g** in 52% yield as a white solid.

**m.p.**: 177.7-179.8 °C.

**TLC**:  $R_f$  = 0.4 (DCM: MeOH = 30:1).

**<sup>1</sup>H NMR** (600 MHz, Chloroform-*d*):  $\delta$  6.11 (s, 1H), 5.42 (d,  $J$  = 15.0 Hz, 1H), 5.22 (d,  $J$  = 15.0 Hz, 1H), 4.16 (t,  $J$  = 7.8 Hz, 2H), 3.48 (q,  $J$  = 7.4 Hz, 1H), 3.13 (t,  $J$  = 7.8 Hz, 2H), 2.24 (quint,  $J$  = 7.8 Hz, 2H), 1.55 (dd,  $J$  = 7.4, 1.4 Hz, 3H).

**<sup>13</sup>C NMR** (150 MHz, Chloroform-*d*):  $\delta$  172.2, 158.2, 151.0, 147.8, 117.2, 98.6, 65.0, 48.6, 38.6, 31.8, 21.3, 14.3.

**HRMS** (ESI):  $m/z$  calcd for C<sub>12</sub>H<sub>14</sub>NO<sub>3</sub> [M+H]<sup>+</sup>: 220.0968, found 220.0968.

**FT-IR** (cm<sup>-1</sup>): 1738, 1649, 1572, 1243, 1033, 636.

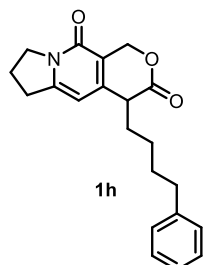

**1h** was obtained from **S3h** in 56% yield as a brownish oil.

**TLC**:  $R_f$  = 0.4 (DCM: MeOH = 30:1).

**<sup>1</sup>H NMR** (600 MHz, Chloroform-*d*):  $\delta$  7.27 (t,  $J$  = 7.4 Hz, 2H), 7.20-7.11 (m, 3H), 5.92 (s, 1H), 5.41 (d,  $J$  = 15.6 Hz, 1H), 5.21 (d,  $J$  = 15.6 Hz, 1H), 4.14 (t,  $J$  = 7.4 Hz, 2H), 3.40 (t,  $J$  = 6.8 Hz,

1H), 3.08 (t,  $J = 7.8$  Hz, 2H), 2.60 (td,  $J = 7.6, 3.8$  Hz, 2H), 2.23 (quint,  $J = 7.4$  Hz, 2H), 1.92-1.83 (m, 2H), 1.70-1.59 (m, 2H), 1.45 (quint,  $J = 7.8$  Hz, 2H).

**$^{13}\text{C}$  NMR** (150 MHz, Chloroform- $d$ ):  $\delta$  171.4, 158.3, 150.5, 146., 141.9, 128.3, 128.2, 125.7, 117.0, 100.0, 65.8, 48.5, 44.5, 35.4, 31.7, 31.3, 30.9, 26.2, 21.3.

**HRMS** (ESI):  $m/z$  calcd for  $\text{C}_{21}\text{H}_{23}\text{NNaO}_3$   $[\text{M}+\text{Na}]^+$ : 360.1570, found 360.1581.

**FT-IR** ( $\text{cm}^{-1}$ ): 1634, 1417, 1121, 673.

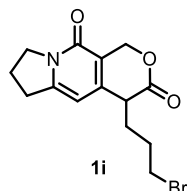

**1i** was obtained from **S3i** in 48% yield as a yellow oil.

**TLC**:  $R_f = 0.4$  (DCM: MeOH = 30:1).

**$^1\text{H}$  NMR** (400 MHz, Chloroform- $d$ ):  $\delta$  6.06 (s, 1H), 5.40 (d,  $J = 15.6$  Hz, 1H), 5.28 (d,  $J = 15.6$  Hz, 1H), 4.16 (t,  $J = 7.2$  Hz, 2H), 3.47 (q,  $J = 6.8$  Hz, 3H), 3.14 (t,  $J = 7.8$  Hz, 2H), 2.25 (quint,  $J = 7.6$  Hz, 2H), 2.09-1.94 (m, 4H).

**$^{13}\text{C}$  NMR** (100 MHz, Chloroform- $d$ ):  $\delta$  170.8, 158.2, 150.9, 146.1, 117.0, 99.6, 65.8, 48.5, 43.2, 32.7, 31.7, 29.3, 29.2, 21.3.

**HRMS** (ESI):  $m/z$  calcd for  $\text{C}_{14}\text{H}_{16}\text{BrNNaO}_3$   $[\text{M}+\text{Na}]^+$ : 348.0217, found 348.0206.

**FT-IR** ( $\text{cm}^{-1}$ ): 1712, 1649, 1260, 668, 530.

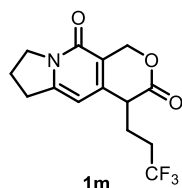

**1m** was obtained from **S3m** in 64% yield as a light yellow solid.

**m.p.**: 105.6-106.4 °C.

**TLC**:  $R_f = 0.4$  (DCM: MeOH = 30:1).

**$^1\text{H}$  NMR** (600 MHz, Chloroform- $d$ ):  $\delta$  6.04 (s, 1H), 5.38 (s, 2H), 4.17 (t,  $J = 7.2$  Hz, 2H), 3.47 (t,  $J = 6.8$  Hz, 1H), 3.14 (t,  $J = 7.8$  Hz, 2H), 2.44-2.23 (m, 4H), 2.21-2.09 (m, 2H).

**$^{13}\text{C}$  NMR** (150 MHz, Chloroform- $d$ ):  $\delta$  170.2, 151.4, 145.1, 126.5 (d,  $J = 274.5$  Hz), 65.7, 48.8, 42.6, 31.9, 31.1 (q,  $J = 28.5$  Hz), 22.7, 22.7, 21.3.

**$^{19}\text{F}$  NMR** (564 MHz, Chloroform- $d$ ):  $\delta$  -66.33.

**HRMS** (ESI):  $m/z$  calcd for  $\text{C}_{14}\text{H}_{14}\text{F}_3\text{NNaO}_3$   $[\text{M}+\text{Na}]^+$ : 324.0818, found 324.0810.

**FT-IR** ( $\text{cm}^{-1}$ ): 1650, 1441, 1257, 1140, 736.

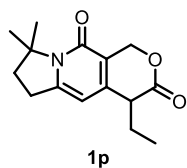

**1p** was obtained from **S3p** in 65% yield as a pale yellow solid.

**m.p.:** 129.3-131.9 °C.

**TLC:**  $R_f$  = 0.7 (DCM: MeOH = 30:1).

**<sup>1</sup>H NMR** (600 MHz, Chloroform-*d*):  $\delta$  5.92 (s, 1H), 5.38 (d,  $J$  = 15.6 Hz, 1H), 5.22 (d,  $J$  = 15.6 Hz, 1H), 3.35 (t,  $J$  = 6.6 Hz, 1H), 3.00 (t,  $J$  = 7.8 Hz, 2H), 2.08 (t,  $J$  = 7.8 Hz, 2H), 2.00-1.89 (m, 2H), 1.70 (s, 3H), 1.68 (s, 3H), 1.02 (t,  $J$  = 7.4 Hz, 3H).

**<sup>13</sup>C NMR** (100 MHz, Chloroform-*d*):  $\delta$  171.4, 158.8, 150.4, 146.0, 118.2, 99.9, 68.7, 66.0, 45.3, 37.6, 28.3, 25.5, 25.3, 24.8, 11.2.

**HRMS** (ESI):  $m/z$  calcd for C<sub>15</sub>H<sub>19</sub>NNaO<sub>3</sub> [M+Na]<sup>+</sup>: 284.1257, found 284.1260.

**FT-IR** (cm<sup>-1</sup>): 1738, 1656, 1573, 1226, 1046, 733.

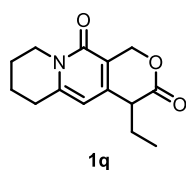

**1q** was obtained from **S3q** in 54% yield as a pale yellow solid.

**m.p.:** 140.1-142.6 °C.

**TLC:**  $R_f$  = 0.6 (DCM: MeOH = 30:1).

**<sup>1</sup>H NMR** (400 MHz, Chloroform-*d*):  $\delta$  5.89 (s, 1H), 5.41 (d,  $J$  = 16.8 Hz, 1H), 5.24 (d,  $J$  = 16.8 Hz, 1H), 4.10-3.92 (m, 2H), 3.35 (t,  $J$  = 6.4 Hz, 1H), 2.81 (t,  $J$  = 6.8 Hz, 2H), 2.09-1.90 (m, 4H), 1.83 (quint,  $J$  = 6.8 Hz, 2H), 1.01 (t,  $J$  = 7.4 Hz, 3H).

**<sup>13</sup>C NMR** (100 MHz, Chloroform-*d*):  $\delta$  171.3, 159.5, 147.6, 144.7, 116.3, 103.6, 66.4, 45.0, 41.5, 28.8, 25.1, 21.9, 18.4, 11.5.

**HRMS** (ESI):  $m/z$  calcd for C<sub>14</sub>H<sub>18</sub>NO<sub>3</sub> [M+H]<sup>+</sup>: 248.1281, found 248.1288.

**FT-IR** (cm<sup>-1</sup>): 1739, 1650, 1566, 1454, 1042, 668.

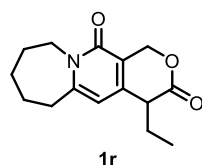

**1r** was obtained from **S3r** in 63% yield as a pale yellow solid.

**m.p.:** 188.3-189.4 °C.

**TLC:**  $R_f$  = 0.6 (DCM: MeOH = 30:1).

**<sup>1</sup>H NMR** (600 MHz, Chloroform-*d*):  $\delta$  5.87 (s, 1H), 5.38 (d,  $J$  = 15.8 Hz, 1H), 5.23 (d,  $J$  = 15.8 Hz, 1H), 4.50-4.42 (dd,  $J$  = 14.4, 8.6 Hz, 1H), 4.27 (dd,  $J$  = 14.4, 8.6 Hz, 1H), 3.34 (t,  $J$  = 6.6 Hz, 1H), 2.83-2.78 (m, 2H), 2.03-1.95 (m, 1H), 1.95-1.90 (m, 1H), 1.85-1.73 (m, 6H), 1.01 (t,  $J$  = 7.4 Hz, 3H).

**<sup>13</sup>C NMR** (100 MHz, Chloroform-*d*):  $\delta$  171.2, 159.5, 152.3, 144.8, 117.1, 104.1, 66.7, 44.9, 43.4, 35.0, 29.5, 27.6, 27.0, 25.1, 11.1.

**HRMS** (ESI):  $m/z$  calcd for C<sub>15</sub>H<sub>20</sub>NO<sub>3</sub> [M+H]<sup>+</sup>: 262.1438, found 262.1443.

**FT-IR** (cm<sup>-1</sup>): 1648, 1055, 1014, 743.

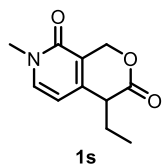

**1s** was obtained from **S3s** in 15% yield as a white solid.

**m.p.:** 98.5-100.1 °C.

**TLC:**  $R_f$  = 0.5 (DCM: MeOH = 30:1).

**<sup>1</sup>H NMR** (600 MHz, Chloroform-*d*):  $\delta$  7.31 (d,  $J$  = 7.2 Hz, 1H), 6.05 (d,  $J$  = 7.2 Hz, 1H), 5.43 (d,  $J$  = 16.2 Hz, 1H), 5.26 (d,  $J$  = 16.2 Hz, 1H), 3.57 (s, 3H), 3.41 (t,  $J$  = 6.6 Hz, 1H), 2.04-1.97 (m, 1H), 1.96-1.90 (m, 1H), 1.01 (t,  $J$  = 7.4 Hz, 3H).

**<sup>13</sup>C NMR** (150 MHz, Chloroform-*d*):  $\delta$  170.8, 159.3, 145.6, 137.9, 120.5, 104.8, 66.3, 44.9, 37.3, 25.2, 11.0.

**HRMS** (ESI):  $m/z$  calcd for  $C_{11}H_{13}NNaO_3$   $[M+Na]^+$ : 230.0788, found 230.0798.

**FT-IR** ( $cm^{-1}$ ): 1737, 1656, 1410, 1124, 658.

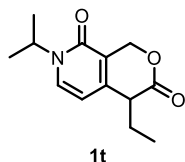

**1t** was obtained from **S3t** in 17% yield as a white solid.

**m.p.:** 102.5-103.3 °C.

**TLC:**  $R_f$  = 0.4 (DCM: MeOH = 30:1).

**<sup>1</sup>H NMR** (400 MHz, Chloroform-*d*):  $\delta$  7.35 (d,  $J$  = 7.2 Hz, 1H), 6.10 (d,  $J$  = 7.2 Hz, 1H), 5.43 (d,  $J$  = 16.4 Hz, 1H), 5.26 (d,  $J$  = 16.4 Hz, 1H), 5.27-5.22 (m, 1H), 3.40 (t,  $J$  = 6.4 Hz, 1H), 2.08-1.88 (m, 2H), 1.38 (d,  $J$  = 5.6 Hz, 1H), 1.35 (d,  $J$  = 5.6 Hz, 1H), 1.02 (t,  $J$  = 7.4 Hz, 3H).

**<sup>13</sup>C NMR** (150 MHz, Chloroform-*d*):  $\delta$  171.0, 158.5, 144.6, 132.5, 120.3, 105.1, 66.5, 46.5, 44.8, 25.1, 21.9, 11.1.

**HRMS** (ESI):  $m/z$  calcd for  $C_{13}H_{18}NO_3$   $[M+H]^+$ : 236.1281, found 236.1293

**FT-IR** ( $cm^{-1}$ ): 1738, 1652, 1600, 1461, 1230, 1048, 657.

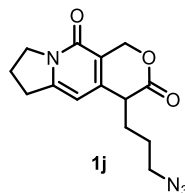

**1j** was obtained in 73% yield as a light yellow oil.

**TLC:**  $R_f$  = 0.4 (DCM: MeOH = 30:1).

**<sup>1</sup>H NMR** (400 MHz, Chloroform-*d*):  $\delta$  6.03 (s, 1H), 5.40 (d,  $J$  = 16.0 Hz, 1H), 5.28 (d,  $J$  = 16.0 Hz, 1H), 4.17 (t,  $J$  = 7.2 Hz, 2H), 3.45 (t,  $J$  = 6.8 Hz, 1H), 3.37 (t,  $J$  = 6.4 Hz, 2H), 3.12 (t,  $J$  = 7.8 Hz, 2H), 2.24 (quint,  $J$  = 7.6 Hz, 3H), 2.01-1.93 (m, 2H), 1.79-1.65 (m, 2H).

**<sup>13</sup>C NMR** (150 MHz, Chloroform-*d*):  $\delta$  170.8, 158.2, 150.9, 146.1, 117.1, 99.5, 99.5, 65.8, 50.7, 48.6, 43.6, 31.7, 28.1, 26.0, 21.3.

**HRMS** (ESI):  $m/z$  calcd for  $C_{14}H_{16}N_4NaO_3 [M+Na]^+$ : 311.1115, found 311.1114.

**FT-IR** ( $cm^{-1}$ ): 1649, 1573, 1440, 1236, 1074, 643.

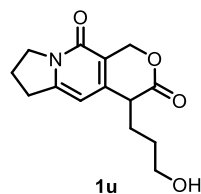

**1u** was obtained in 32% yield as a green oil.

**TLC**:  $R_f$  = 0.2 (DCM: MeOH = 15:1).

**$^1H$  NMR** (600 MHz, Chloroform- $d$ ):  $\delta$  6.06 (s, 1H), 5.39 (d,  $J$  = 15.6 Hz, 1H), 5.25 (d,  $J$  = 15.6 Hz, 1H), 4.15 (t,  $J$  = 7.8 Hz, 2H), 3.69 (td,  $J$  = 10.2, 4.8 Hz, 2H), 3.49 (t,  $J$  = 6.6 Hz, 1H), 3.11 (t,  $J$  = 7.8 Hz, 2H), 2.24 (quint,  $J$  = 7.6 Hz, 2H), 1.99 (quint,  $J$  = 7.0 Hz, 2H), 1.69 (hept,  $J$  = 7.4 Hz, 2H).

**$^{13}C$  NMR** (150 MHz, Chloroform- $d$ ):  $\delta$  171.4, 158.4, 150.7, 146.7, 117.0, 100.0, 65.8, 61.9, 48.6, 44.1, 31.7, 29.5, 27.8, 21.3.

**HRMS** (ESI):  $m/z$  calcd for  $C_{14}H_{17}NNaO_4 [M+Na]^+$ : 286.1050, found 286.1050.

**FT-IR** ( $cm^{-1}$ ): 3443, 2923, 1633, 1421, 703.

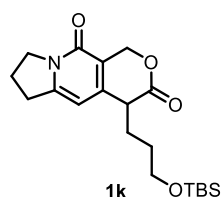

**1k** was obtained in 81% yield as a light yellow oil.

**TLC**:  $R_f$  = 0.5 (DCM: MeOH = 15:1).

**$^1H$  NMR** (400 MHz, Chloroform- $d$ ):  $\delta$  6.03 (s, 1H), 5.39 (d,  $J$  = 15.6 Hz, 1H), 5.25 (d,  $J$  = 15.6 Hz, 1H), 4.14 (t,  $J$  = 7.2 Hz, 2H), 3.63 (t,  $J$  = 6.0 Hz, 2H), 3.45 (t,  $J$  = 6.8 Hz, 1H), 3.10 (t,  $J$  = 5.2 Hz, 2H), 2.22 (quint,  $J$  = 7.6 Hz, 2H), 1.96 (q,  $J$  = 7.0 Hz, 2H), 1.73-1.53 (m, 3H), 0.87 (s, 9H), 0.03 (s, 6H).

**$^{13}C$  NMR** (150 MHz, Chloroform- $d$ ):  $\delta$  171.4, 158.4, 150.5, 146.9, 117.2, 100.0, 65.8, 62.1, 48.6, 31.8, 29.6, 27.6, 25.8, 21.4, 18.2, -5.3.

**HRMS** (ESI):  $m/z$  calcd for  $C_{20}H_{31}NNaO_4Si [M+Na]^+$ : 400.1915, found 400.1913.

**FT-IR** ( $cm^{-1}$ ): 1633, 1467, 1411, 1076, 703.

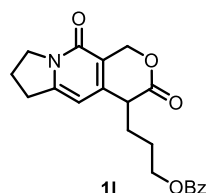

**1l** was obtained in 78% yield as a pale yellow solid.

**m.p.**: 141.9-143.5 °C.

**TLC**:  $R_f$  = 0.4 (DCM: MeOH = 15:1).

**<sup>1</sup>H NMR** (600 MHz, Chloroform-*d*): δ 8.02 (d, *J* = 8.4 Hz, 2H), 7.57 (t, *J* = 7.4 Hz, 1H), 7.46 (d, *J* = 7.6 Hz, 2H), 6.02 (s, 1H), 5.41 (d, *J* = 15.6 Hz, 1H), 5.29 (d, *J* = 15.6 Hz, 1H), 4.42-4.31 (m, 2H), 4.14 (t, *J* = 7.2 Hz, 2H), 3.51 (t, *J* = 6.8 Hz, 1H), 3.08 (t, *J* = 7.8 Hz, 2H), 2.22 (quint, *J* = 7.8 Hz, 2H), 2.09-2.00 (m, 2H), 1.97-1.86 (m, 2H).

**<sup>13</sup>C NMR** (150 MHz, Chloroform-*d*): δ 170.9, 166.4, 158.3, 150.8, 146.3, 133.0, 130.0, 129.5, 128.4, 117.3, 99.7, 65.9, 63.9, 48.6, 43.9, 31.7, 27.7, 26.1, 21.3.

**HRMS** (ESI): *m/z* calcd for C<sub>21</sub>H<sub>21</sub>NNaO<sub>5</sub> [M+Na]<sup>+</sup>: 390.1312, found 390.1302.

**FT-IR** (cm<sup>-1</sup>): 1715, 1651, 1574, 1276, 1115, 715.

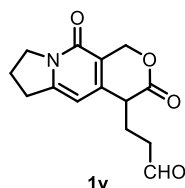

**1v** was obtained in 43% yield as a pale yellow oil.

**TLC**: R<sub>f</sub> = 0.3 (DCM: MeOH = 15:1).

**<sup>1</sup>H NMR** (600 MHz, Chloroform-*d*): δ 9.82 (s, 1H), 6.08 (s, 1H), 5.38 (d, *J* = 15.6 Hz, 1H), 5.30 (d, *J* = 15.6 Hz, 1H), 4.15 (t, *J* = 7.2 Hz, 2H), 3.45 (dd, *J* = 9.2, 4.8 Hz, 1H), 3.12 (t, *J* = 7.2 Hz, 2H), 2.84-2.77 (m, 1H), 2.73-2.67 (m, 1H), 2.24 (quint, *J* = 7.2 Hz, 3H), 2.11-2.05 (m, 1H).

**<sup>13</sup>C NMR** (150 MHz, Chloroform-*d*): δ 200.5, 170.7, 158.3, 151.1, 146.1, 117.2, 99.4, 65.8, 48.6, 42.9, 40.6, 31.8, 22.9, 21.4.

**HRMS** (ESI): *m/z* calcd for C<sub>14</sub>H<sub>16</sub>NO<sub>4</sub> [M+H]<sup>+</sup>: 262.1074, found 262.1075.

**FT-IR** (cm<sup>-1</sup>): 1727, 1647, 1574, 1237, 1039, 750.

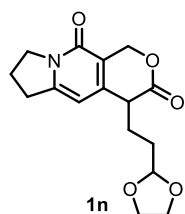

**1n** was obtained in 38% yield as a yellow oil.

**TLC**: R<sub>f</sub> = 0.4 (DCM: MeOH = 15:1).

**<sup>1</sup>H NMR** (600 MHz, Chloroform-*d*): δ 6.08 (s, 1H), 5.40 (d, *J* = 15.6 Hz, 1H), 5.27 (d, *J* = 15.6 Hz, 1H), 4.90 (t, *J* = 4.2 Hz, 1H), 4.15 (m, 2H), 3.98-3.94 (m, 2H), 3.88-3.83 (m, 2H), 3.49 (t, *J* = 7.0 Hz, 1H), 3.11 (t, *J* = 7.8 Hz, 2H), 2.24 (quint, *J* = 7.8 Hz, 2H), 2.06-1.98 (m, 2H), 2.12-2.04 (m, 2H).

**<sup>13</sup>C NMR** (150 MHz, Chloroform-*d*): δ 171.2, 158.4, 150.6, 146.6, 117.3, 103.5, 100.1, 65.8, 64.9, 48.6, 44.1, 31.8, 30.6, 25.0, 21.4.

**HRMS** (ESI): *m/z* calcd for C<sub>16</sub>H<sub>19</sub>NNaO<sub>5</sub> [M+Na]<sup>+</sup>: 328.1155, found 328.1141.

**FT-IR** (cm<sup>-1</sup>): 1737, 1650, 1573, 1440, 1235, 1139, 1036, 749.

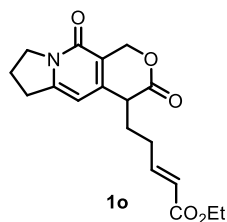

**1o** was obtained in 51% yield as a white oil.

**TLC:**  $R_f$  = 0.2 (DCM: MeOH = 15:1).

**$^1\text{H}$  NMR** (600 MHz, Chloroform- $d$ ):  $\delta$  7.01-6.83 (m, 1H), 5.88 (d,  $J$  = 16.2 Hz, 1H), 5.40 (d,  $J$  = 15.6 Hz, 1H), 5.27 (d,  $J$  = 15.6 Hz, 1H), 4.19 (q,  $J$  = 7.2 Hz, 2H), 4.15 (t,  $J$  = 7.8 Hz, 3H), 3.44 (t,  $J$  = 6.6 Hz, 1H), 3.12 (t,  $J$  = 7.8 Hz, 2H), 2.36 (q,  $J$  = 7.2 Hz, 2H), 2.24 (quint,  $J$  = 7.8 Hz, 2H), 2.09-1.97 (m, 2H), 1.29 (t,  $J$  = 7.2 Hz, 3H).

**$^{13}\text{C}$  NMR** (150 MHz, Chloroform- $d$ ):  $\delta$  170.7, 166.2, 158.3, 150.9, 146.2, 146.0, 122.8, 117.3, 99.5, 65.9, 60.3, 48.6, 43.5, 31.8, 29.3, 29.0, 21.4, 14.2.

**HRMS** (ESI):  $m/z$  calcd for  $\text{C}_{18}\text{H}_{21}\text{NNaO}_5$   $[\text{M}+\text{Na}]^+$ : 354.1312, found 354.1304.

**FT-IR** ( $\text{cm}^{-1}$ ): 1717, 1651, 1576, 1369, 1038, 749.

### 3. Experimental Details for the Synthesis of Catalysts

**Table S2.** Chiral SPA-triazolium bromide catalysts

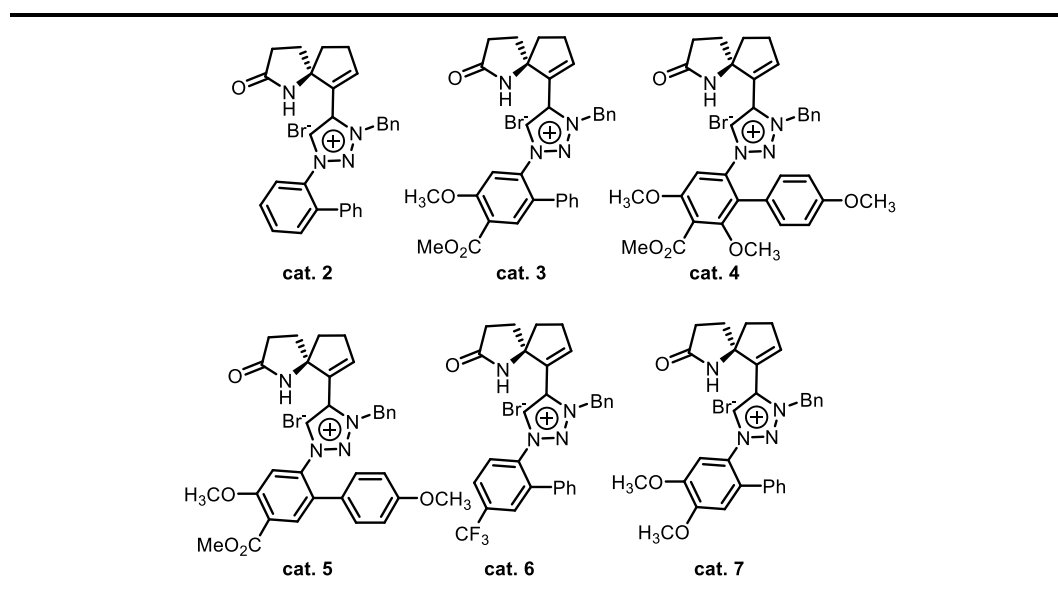

#### General procedure for the preparation of catalysts

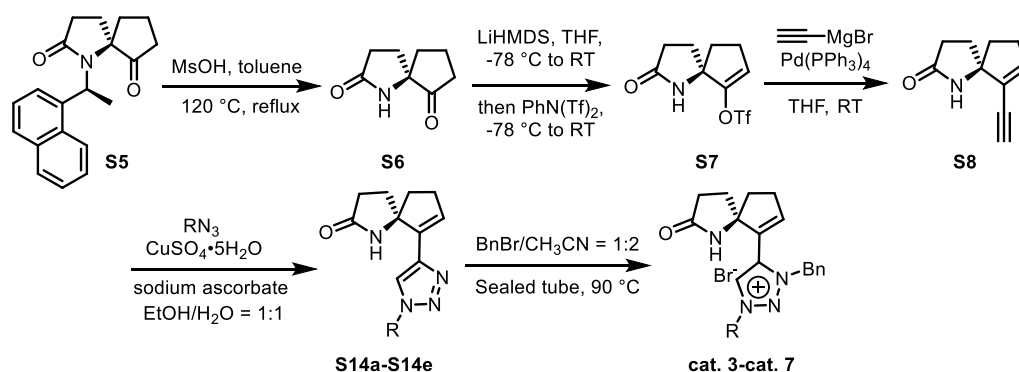

*Note: cat. 2 and S5-S8 were prepared according to our previous work.<sup>6</sup>*

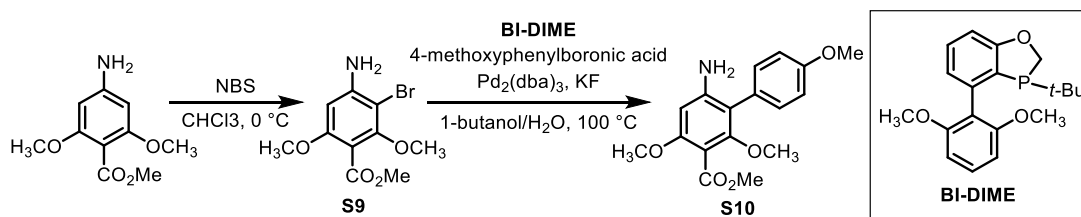

**Synthesis of compound S9:** To a stirred solution of methyl 4-amino-2,6-dimethoxybenzoate (10 mmol, 1.0 equiv.) in 40 mL  $\text{CHCl}_3$  was slowly added NBS (10 mmol, 1.0 equiv.) in 1 hour at 0 °C. Then, the reaction mixture was stirred at 0 °C for another 30 minutes, quenched with water, and extracted with DCM ( $3 \times 50$  mL). The combined organic layers were dried over  $\text{Na}_2\text{SO}_4$  and concentrated in vacuo. The residue was purified by flash chromatography on silica gel to give **S9**.

**Synthesis of compound S10:**<sup>7</sup> An oven-dried round-bottom flask was charged with arylboronic acid (3 mmol, 1.5 equiv.), potassium fluoride (6 mmol, 3.0 equiv.),  $\text{Pd}_2(\text{dba})_3$  (2 mol%), BI-DIME (4 mol%), and degassed *n*-butanol/water (12 mL/3 mL) under argon. The mixture was pumped and refilled with argon three times before aryl halide (2 mmol, 1.5 equiv.) was added. The resulting mixture was stirred at 100 °C for 24 h, cooled to room temperature, partitioned with water (20 mL) and dichloromethane (40 mL). The organic layer was separated, dried over  $\text{Na}_2\text{SO}_4$ , concentrated, and purified by silica gel column chromatography to provide biaryl compound **S10**.

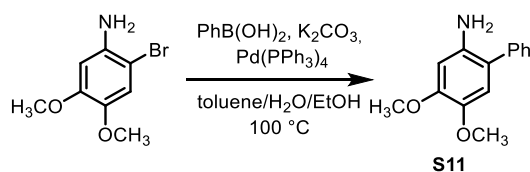

**Synthesis of compound S11:** To a mixture of arylboronic acid (2.6 mmol, 1.3 equiv.), potassium carbonate (8 mmol, 4.0 equiv.),  $\text{Pd}(\text{PPh}_3)_4$  (1 mol%), was charged degassed toluene/ $\text{H}_2\text{O}$ / $\text{EtOH}$  (9 mL/6 mL/3 mL). The mixture was pumped and refilled with nitrogen three times before aryl halide (2 mmol, 1.0 equiv.) was added. The resulting mixture was stirred at 95 °C under nitrogen for 24 h, and then cooled to room temperature, partitioned with water (20 mL) and dichloromethane (40 mL). The organic layer was separated, dried over  $\text{Na}_2\text{SO}_4$ , concentrated, and purified by silica gel column chromatography to provide biaryl compound **S11**.

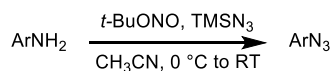

*Note: **Compound S12** and **S13** were prepared following the procedure of literature,<sup>8</sup> other azides were known compounds according to the literature.<sup>9</sup>*

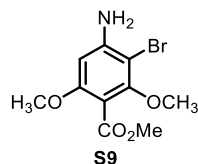

**S9** was obtained in 44% yield as a white solid.

**m.p.:** 122.6-125.1 °C.

**TLC:**  $R_f$  = 0.6 (DCM: EA = 4:1).

**<sup>1</sup>H NMR** (400 MHz, Chloroform-*d*):  $\delta$  6.11 (s, 1H), 4.36 (brs, 2H), 3.88 (s, 3H), 3.85 (s, 3H), 3.76 (s, 3H).

**<sup>13</sup>C NMR** (100 MHz, Chloroform-*d*):  $\delta$  166.1, 157.4, 156.1, 147.1, 108.9, 95.0, 93.9, 61.9, 55.9, 52.3.

**HRMS** (ESI):  $m/z$  calcd for C<sub>10</sub>H<sub>12</sub>BrNNaO<sub>4</sub> [M+Na]<sup>+</sup>: 311.9842, found 311.9842.

**FT-IR** (cm<sup>-1</sup>): 3473, 3373, 2944, 1719, 1619, 1407, 1269, 1224, 1105, 814, 664.

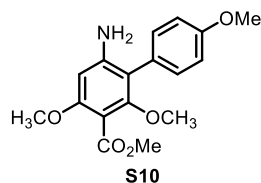

**S10** was obtained in 82% yield as a white solid.

**m.p.:** 198.3-199.9 °C.

**TLC:**  $R_f$  = 0.6 (DCM: EA = 4:1).

**<sup>1</sup>H NMR** (600 MHz, Chloroform-*d*):  $\delta$  7.36-7.22 (m, 3H), 6.98 (d,  $J$  = 8.6 Hz, 2H), 3.89 (s, 3H), 3.85 (s, 3H), 3.80 (s, 3H), 3.34 (s, 3H).

**<sup>13</sup>C NMR** (100 MHz, Chloroform-*d*):  $\delta$  167.2, 158.8, 157.3, 157.1, 147.6, 131.7, 125.8, 114.3, 113.0, 107.9, 93.7, 61.2, 55.8, 55.2, 52.2.

**HRMS** (ESI):  $m/z$  calcd for C<sub>17</sub>H<sub>19</sub>NNaO<sub>5</sub> [M+Na]<sup>+</sup>: 340.1155 found 340.1166.

**FT-IR** (cm<sup>-1</sup>): 3470, 2923, 2851, 1721, 1602, 1573, 1463, 1245, 1105, 1027, 801, 635, 539.

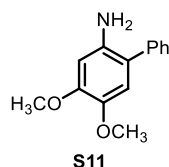

**S11** was obtained in 85% yield as a light yellow oil.

**TLC:**  $R_f$  = 0.3 (PE: EA = 3:1).

**<sup>1</sup>H NMR** (600 MHz, Chloroform-*d*):  $\delta$  7.49-7.39 (m, 4H), 7.34-7.29 (m, 1H), 6.71 (s, 1H), 6.37 (s, 1H), 3.86 (s, 3H), 3.82 (s, 3H), 3.54 (brs, 2H).

**$^{13}\text{C}$  NMR** (150 MHz, Chloroform-*d*):  $\delta$  149.3, 142.1, 139.4, 137.2, 129.1, 128.7, 126.8, 119.1, 114.4, 100.7, 56.5, 55.8.

**HRMS** (ESI):  $m/z$  calcd for  $\text{C}_{14}\text{H}_{15}\text{NNaO}_2$   $[\text{M}+\text{Na}]^+$ : 252.0995 found 252.0985.

**FT-IR** ( $\text{cm}^{-1}$ ): 3443, 3363, 2934, 1613, 1516, 1490, 1441, 1405, 1283, 1217, 1153, 1022, 767, 568.

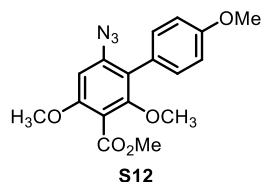

**S12** was obtained in 83% yield as a colorless oil.

**TLC**:  $R_f$  = 0.5 (PE: EA = 2:1)

**$^1\text{H}$  NMR** (600 MHz, Chloroform-*d*):  $\delta$  7.37-7.21 (m, 3H), 6.96 (d,  $J$  = 7.2 Hz, 2H), 3.92 (s, 3H), 3.89 (s, 3H), 3.85 (s, 3H), 3.32 (s, 3H).

**$^{13}\text{C}$  NMR** (150 MHz, Chloroform-*d*):  $\delta$  166.3, 159.0, 157.0, 156.6, 140.8, 131.7, 124.8, 120.0, 115.1, 113.5, 97.2, 61.3, 56.1, 55.1, 52.5.

**HRMS** (ESI):  $m/z$  calcd for  $\text{C}_{17}\text{H}_{17}\text{N}_3\text{NaO}_5$   $[\text{M}+\text{Na}]^+$ : 366.1060 found 366.1054.

**FT-IR** ( $\text{cm}^{-1}$ ): 2940, 2838, 2112, 1734, 1598, 1482, 1338, 1246, 1110, 1029, 950, 797, 628, 532.

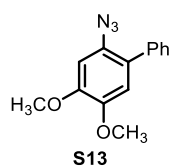

**S13** was obtained in 87% yield as a yellow oil.

**TLC**:  $R_f$  = 0.3 (PE).

**$^1\text{H}$  NMR** (600 MHz, Chloroform-*d*):  $\delta$  7.50-7.38 (m, 4H), 7.37-7.30 (m, 1H), 6.84 (s, 1H), 6.73 (s, 1H), 3.95 (s, 3H), 3.88 (s, 3H).

**$^{13}\text{C}$  NMR** (150 MHz, Chloroform-*d*):  $\delta$  149.2, 146.4, 138.0, 129.4, 128.9, 128.1, 127.2, 125.9, 113.9, 102.4, 56.2, 56.1.

**HRMS** (ESI):  $m/z$  calcd for  $\text{C}_{14}\text{H}_{13}\text{N}_3\text{NaO}_2$   $[\text{M}+\text{Na}]^+$ : 278.0900 found 278.0888.

**FT-IR** ( $\text{cm}^{-1}$ ): 2845, 2102, 1608, 1524, 1490, 1441, 1390, 1355, 1237, 1209, 1176, 1113, 1039, 862, 826, 770, 750, 700, 662.

*Note: Compounds S14a-S14e were synthesized following the literature procedure.*<sup>6</sup>

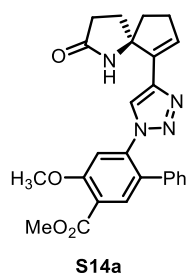

**S14a** was obtained in 47% yield as a pale yellow solid.

**TLC**:  $R_f$  = 0.4 (DCM: MeOH = 20:1).

**m.p.:** 93.3-94.5 °C.

$[\alpha]_D^{26} = +18.0$  (c = 0.5, CHCl<sub>3</sub>).

**<sup>1</sup>H NMR** (600 MHz, Chloroform-*d*): δ 7.94 (s, 1H), 7.37 (s, 1H), 7.34-7.29 (m, 3H), 7.06 (dd, *J* = 6.4, 3.0 Hz, 2H), 7.04 (s, 1H), 6.52 (t, *J* = 2.6 Hz, 1H), 5.60 (s, 1H), 4.01 (s, 3H), 3.93 (s, 3H), 2.53-2.48 (m, 1H), 2.45-2.39 (m, 1H), 2.37-2.30 (m, 1H), 2.24 (ddd, *J* = 13.2, 7.8, 2.6 Hz, 1H), 2.02-1.90 (m, 3H), 1.76-1.68 (m, 1H).

**<sup>13</sup>C NMR** (150 MHz, Chloroform-*d*): δ 177.0, 165.3, 159.1, 141.0, 138.1, 136.4, 134.8, 134.4, 131.6, 128.8, 128.7, 127.9, 127.6, 121.2, 120.8, 109.5, 71.0, 56.5, 52.3, 39.5, 30.9, 29.8, 29.1.

**HRMS** (ESI): *m/z* calcd for C<sub>25</sub>H<sub>24</sub>N<sub>4</sub>NaO<sub>4</sub> [M+Na]<sup>+</sup>: 467.1681, found 467.1690.

**FT-IR** (cm<sup>-1</sup>): 2950, 2849, 1641, 1468, 1297, 1235, 1090, 705.

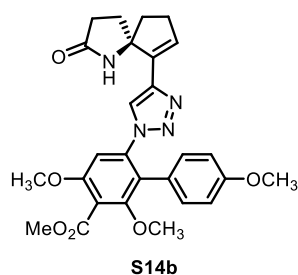

**S14b** was obtained in 37% yield as a white solid.

**TLC:** R<sub>f</sub> = 0.4 (DCM: MeOH = 20:1).

**m.p.:** 94.5-95.8 °C.

$[\alpha]_D^{26} = +7.5$  (c = 0.5, CHCl<sub>3</sub>).

**<sup>1</sup>H NMR** (600 MHz, Chloroform-*d*): δ 7.09 (s, 1H), 6.97 (s, 1H), 6.86 (d, *J* = 8.4 Hz, 2H), 6.53 (t, *J* = 2.6 Hz, 1H), 5.28 (s, 1H), 3.96 (s, 3H), 3.92 (s, 3H), 3.83 (s, 3H), 3.37 (s, 3H), 2.50 (ddt, *J* = 17.4, 9.0, 3.0 Hz, 1H), 2.45-2.33 (m, 2H), 2.25 (ddd, *J* = 13.2, 7.8, 2.4 Hz, 1H), 2.10 (ddd, *J* = 17.2, 9.8, 2.4 Hz, 1H), 1.96-1.88 (m, 2H), 1.71 (dt, *J* = 13.2, 9.6 Hz, 1H).

**<sup>13</sup>C NMR** (150 MHz, Chloroform-*d*): δ 176.9, 165.8, 159.2, 156.4, 156.4, 140.7, 137.5, 134.8, 131.4, 131.0, 124.1, 122.6, 121.3, 119.5, 114.2, 104.7, 71.0, 61.7, 56.4, 55.2, 52.7, 39.3, 30.9, 29.6, 29.1.

**HRMS** (ESI): *m/z* calcd for C<sub>27</sub>H<sub>28</sub>N<sub>4</sub>NaO<sub>6</sub> [M+Na]<sup>+</sup>: 527.1902 found 527.1901.

**FT-IR** (cm<sup>-1</sup>): 2937, 2850, 1643, 1464, 1298, 1248, 1108, 793.

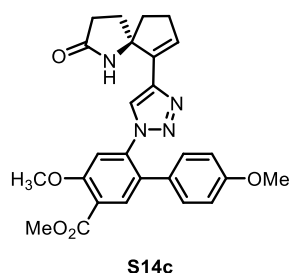

**S14c** was obtained in 45% yield as a white solid.

**TLC:** R<sub>f</sub> = 0.4 (DCM: MeOH = 20:1).

**m.p.:** 87.5-89.9 °C.

$[\alpha]_D^{26} = +12.0$  (c = 0.5, CHCl<sub>3</sub>).

**<sup>1</sup>H NMR** (600 MHz, Chloroform-*d*): δ 7.92 (s, 1H), 7.36 (s, 1H), 7.08 (s, 1H), 6.98 (d, *J* = 8.6 Hz, 2H), 6.85 (d, *J* = 8.6 Hz, 2H), 6.56 (t, *J* = 2.6 Hz, 1H), 5.38 (s, 1H), 4.00 (s, 3H), 3.93 (s, 3H), 3.83

(s, 3H), 2.55-2.48 (m, 1H), 2.47-2.41 (m, 1H), 2.35 (dt,  $J = 17.4, 9.6$  Hz, 1H), 2.26 (ddd,  $J = 13.2, 7.8, 2.4$  Hz, 1H), 2.03 (ddd,  $J = 10.8, 9.6, 3.0$  Hz, 1H), 1.98-1.91 (m, 2H), 1.79 (dt,  $J = 13.2, 9.8$  Hz, 1H).

**$^{13}\text{C}$  NMR** (150 MHz, Chloroform- $d$ ):  $\delta$  177.0, 165.5, 159.3, 158.8, 141.0, 138.1, 134.9, 134.5, 131.6, 129.8, 128.6, 127.4, 121.2, 120.8, 114.3, 109.4, 71.1, 56.5, 55.2, 52.3, 39.5, 31.0, 29.6, 29.2.

**HRMS** (ESI):  $m/z$  calcd for  $\text{C}_{26}\text{H}_{26}\text{N}_4\text{NaO}_5$   $[\text{M}+\text{Na}]^+$ : 497.1795 found 497.1773.

**FT-IR** ( $\text{cm}^{-1}$ ): 2947, 2844, 1657, 1498, 1433, 1235, 1089, 1026, 687.

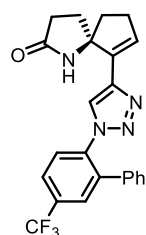

**S14d**

**S14d** was obtained in 49% yield as a brownish solid.

**TLC**:  $R_f = 0.4$  (DCM: MeOH = 20:1).

**m.p.**: 85.4-86.7 °C.

$[\alpha]_D^{26} = +12.0$  ( $c = 0.5$ ,  $\text{CHCl}_3$ ).

**$^1\text{H}$  NMR** (600 MHz, Chloroform- $d$ ):  $\delta$  7.87 (d,  $J = 8.4$  Hz, 1H), 7.81 (d,  $J = 8.4$  Hz, 1H), 7.77 (s, 1H), 7.40-7.35 (m, 3H), 7.26 (s, 1H), 7.13-7.09 (m, 2H), 7.07 (s, 1H), 6.56 (t,  $J = 3.0$  Hz, 1H), 5.45 (s, 1H), 2.55-2.48 (m, 1H), 2.46-2.41 (m, 1H), 2.38-2.31 (m, 1H), 2.27-2.23 (m, 1H), 2.03-1.92 (m, 3H), 1.74-1.70 (m, 1H).

**$^{13}\text{C}$  NMR** (150 MHz, Chloroform- $d$ ):  $\delta$  177.0, 141.1, 137.1, 136.2, 134.8, 131.7, 129.0, 128.6, 128.5, 128.2 (d,  $J = 4.5$  Hz), 126.6, 125.7 (d,  $J = 4.5$  Hz), 121.1, 71.1, 39.5, 31.0, 29.8, 29.2.

**$^{19}\text{F}$  NMR** (376 MHz, Chloroform- $d$ )  $\delta$  -62.07, -73.37.

**HRMS** (ESI):  $m/z$  calcd for  $\text{C}_{23}\text{H}_{20}\text{F}_3\text{N}_4\text{O}$   $[\text{M}+\text{H}]^+$ : 425.1584 found 425.1563.

**FT-IR** ( $\text{cm}^{-1}$ ): 2921, 2343, 1642, 1416, 1140, 1042, 668.

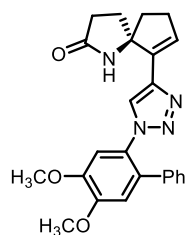

**S14e**

**S14e** was obtained in 57% yield as a white solid.

**TLC**:  $R_f = 0.4$  (DCM: MeOH = 20:1).

**m.p.**: 90.0-91.5 °C.

$[\alpha]_D^{26} = +18.0$  ( $c = 0.5$ ,  $\text{CHCl}_3$ ).

**$^1\text{H}$  NMR** (600 MHz, Chloroform- $d$ ):  $\delta$  7.32-7.27 (m, 3H), 7.18 (s, 1H), 7.09-7.05 (m, 2H), 7.04 (s, 1H), 6.93 (s, 1H), 6.52 (t,  $J = 2.6$  Hz, 1H), 5.52 (s, 1H), 3.97 (d,  $J = 1.2$  Hz, 6H), 2.52-2.48 (m, 1H), 2.46-2.37 (m, 2H), 2.35-2.31 (m, 1H), 2.25-2.22 (m, 1H), 1.99-1.90 (m, 3H), 1.75-1.67 (m, 2H).

**<sup>13</sup>C NMR** (150 MHz, Chloroform-*d*): δ 177.0, 149.8, 148.9, 140.7, 137.5, 135.1, 131.1, 129.1, 128.7, 128.6, 127.6, 121.9, 112.8, 109.2, 71.1, 56.3, 56.2, 39.6, 31.0, 29.8, 29.2.

**HRMS** (ESI): *m/z* calcd for C<sub>24</sub>H<sub>24</sub>N<sub>4</sub>NaO<sub>3</sub> [M+Na]<sup>+</sup>: 439.1741 found 439.1722.

**FT-IR** (cm<sup>-1</sup>): 2923, 2062, 1642, 1217, 1015, 703.

*Note: Compounds cat. 3-cat. 7 were synthesized following the literature procedure.<sup>6</sup>*

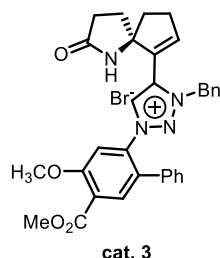

**cat. 3** was obtained in 74% yield as a pale yellow solid.

**TLC**: R<sub>f</sub> = 0.2 (DCM: MeOH = 10:1)

**m.p.**: 137.8-138.5 °C.

[α]<sub>D</sub><sup>26</sup> = +40.0 (c = 0.5, CHCl<sub>3</sub>).

**<sup>1</sup>H NMR** (600 MHz, Chloroform-*d*): δ 8.97 (s, 1H), 8.08 (s, 1H), 7.92 (s, 1H), 7.41-7.29 (m, 6H), 7.14 (d, *J* = 7.4 Hz, 3H), 6.92 (d, *J* = 8.4 Hz, 2H), 6.66 (s, 1H), 5.97 (d, *J* = 15.2 Hz, 1H), 5.78 (d, *J* = 15.2 Hz, 1H), 4.07 (s, 3H), 3.93 (s, 3H), 2.67-2.60 (m, 1H), 2.44 (dt, *J* = 18.2, 7.8 Hz, 1H), 2.20-2.14 (m, 1H), 2.12-2.03 (m, 2H), 1.99-1.92 (m, 1H), 1.74-1.67 (m, 1H), 1.45-1.39 (m, 1H).

**<sup>13</sup>C NMR** (150 MHz, Chloroform-*d*): δ 159.1, 137.1, 135.8, 135.1, 133.9, 131.7, 130.8, 129.5, 129.3, 129.0, 128.6, 128.3, 128.2, 127.9, 123.5, 57.8, 56.0, 30.6, 30.0.

**HRMS** (ESI): *m/z* calcd for C<sub>32</sub>H<sub>31</sub>N<sub>4</sub>O<sub>4</sub> [M-Br]<sup>+</sup>: 535.2340 found 535.2318.

**FT-IR** (cm<sup>-1</sup>): 2923, 2851, 1640, 1185, 1083, 705.

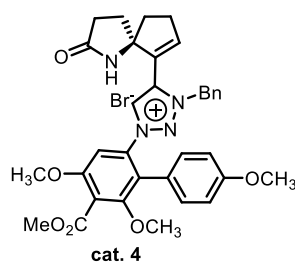

**cat. 4** was obtained in 65% yield as a yellow solid.

**TLC**: R<sub>f</sub> = 0.2 (DCM: MeOH = 10:1).

**m.p.**: 132.1-133.3 °C.

[α]<sub>D</sub><sup>26</sup> = +35.0 (c = 0.5, CHCl<sub>3</sub>).

**<sup>1</sup>H NMR** (600 MHz, Chloroform-*d*): δ 8.84 (s, 1H), 7.74 (s, 1H), 7.42-7.37 (m, 2H), 7.35-7.32 (m, 2H), 7.15-7.03 (m, 2H), 6.88 (d, *J* = 7.2 Hz, 2H), 6.84 (d, *J* = 6.0 Hz, 2H), 6.65 (s, 1H), 5.94 (d, *J* = 15.0 Hz, 1H), 5.78 (d, *J* = 15.0 Hz, 1H), 3.99 (s, 2H), 3.97 (d, *J* = 5.4 Hz, 6H), 3.91 (s, 1H), 3.82 (s, 3H), 3.39 (s, 3H), 2.64-2.59 (m, 1H), 2.46-2.41 (m, 1H), 2.21-2.12 (m, 2H), 2.12-2.04 (m, 2H), 1.64 (ddd, *J* = 13.0, 9.2, 3.6 Hz, 1H), 1.31-1.20 (m, 1H).

**<sup>13</sup>C NMR** (150 MHz, Chloroform-*d*): δ 176.7, 165.2, 159.6, 158.2, 156.8, 156.2, 144.4, 136.8, 135.3, 131.7, 131.1, 131.0, 129.5, 129.4, 129.2, 128.1, 127.9, 127.6, 124.5, 122.7, 121.8, 114.3, 106.9, 98.8, 72.3, 61.9, 57.4, 55.8, 55.2, 52.8, 46.0, 38.3, 31.4, 30.5, 29.8.

**HRMS** (ESI): *m/z* calcd for C<sub>32</sub>H<sub>31</sub>N<sub>4</sub>O<sub>4</sub> [M-Br]<sup>+</sup>: 595.2551 found 595.2533.

**FT-IR** (cm<sup>-1</sup>): 2923, 2852, 1640, 1314, 1108, 668.

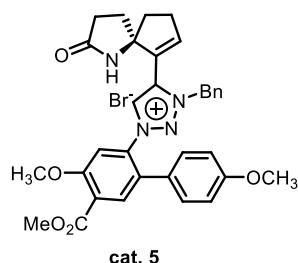

**cat. 5** was obtained in 72% yield as a brownish solid.

**TLC**: R<sub>f</sub> = 0.2 (DCM: MeOH = 10:1).

**m.p.**: 135.9-136.4 °C.

[α]<sub>D</sub><sup>26</sup> = +46.0 (c = 0.5, CHCl<sub>3</sub>).

**<sup>1</sup>H NMR** (600 MHz, Chloroform-*d*): δ 8.96 (s, 1H), 8.01 (s, 1H), 7.88 (s, 1H), 7.38 (d, *J* = 7.3 Hz, 1H), 7.35 (d, *J* = 7.8 Hz, 2H), 7.03 (d, *J* = 8.6 Hz, 2H), 6.94 (d, *J* = 8.4 Hz, 2H), 6.82 (d, *J* = 7.2 Hz, 2H), 5.98 (d, *J* = 15.2 Hz, 1H), 5.80 (d, *J* = 15.2 Hz, 1H), 4.04 (s, 3H), 3.93 (s, 3H), 3.81 (s, 3H), 2.67-2.59 (m, 1H), 2.48-2.41 (m, 1H), 2.19-2.13 (m, 1H), 2.12-2.05 (m, 2H), 1.98 (ddd, *J* = 17.0, 9.4, 3.2 Hz, 1H), 1.72-1.66 (m, 1H), 1.46-1.40 (m, 1H).

**<sup>13</sup>C NMR** (150 MHz, Chloroform-*d*): δ 176.9, 165.2, 159.6, 158.7, 144.5, 137.1, 135.8, 133.9, 131.7, 130.9, 129.8, 129.5, 129.3, 128.2, 127.9, 127.1, 123.4, 112.1, 72.5, 57.7, 56.0, 55.3, 52.5, 38.4, 31.5, 30.6, 29.8.

**HRMS** (ESI): *m/z* calcd for C<sub>33</sub>H<sub>33</sub>N<sub>4</sub>O<sub>5</sub> [M-Br]<sup>+</sup>: 565.2445 found 565.2419.

**FT-IR** (cm<sup>-1</sup>): 2922, 2851, 1692, 1247, 696.

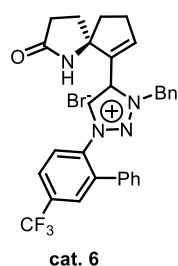

**cat. 6** was obtained in 54% yield as a brownish solid.

**TLC**: R<sub>f</sub> = 0.2 (DCM: MeOH = 10:1).

**m.p.**: 124.6-125.8 °C.

[α]<sub>D</sub><sup>26</sup> = +76.0 (c = 0.5, CHCl<sub>3</sub>).

**<sup>1</sup>H NMR** (600 MHz, Chloroform-*d*): δ 9.21 (s, 1H), 8.39 (d, *J* = 8.4 Hz, 1H), 7.89 (d, *J* = 8.4 Hz, 1H), 7.80 (s, 1H), 7.42 (t, *J* = 7.4 Hz, 2H), 7.37 (q, *J* = 7.8 Hz, 3H), 7.33 (t, *J* = 7.8 Hz, 2H), 7.21 (d, *J* = 7.2 Hz, 2H), 6.88 (d, *J* = 8.4 Hz, 2H), 6.60 (s, 1H), 5.97 (d, *J* = 15.6 Hz, 1H), 5.79 (d, *J* = 15.6 Hz, 1H), 2.68-2.60 (m, 1H), 2.49-2.42 (m, 1H), 2.23-2.18 (m, 1H), 2.14-2.10 (m, 2H), 1.79-1.72 (m, 1H), 1.58-1.49 (m, 1H), 0.91-0.86 (m, 1H).

**<sup>13</sup>C NMR** (150 MHz, Chloroform-*d*): δ 137.4, 135.4, 134.8, 134.2 (q, *J* = 33.0 Hz), 131.8, 131.1, 129.4, 129.3, 129.2, 129.0, 128.8, 128.5, 128.2 (d, *J* = 4.5 Hz), 127.7, 126.4 (d, *J* = 4.5 Hz), 123.9, 122.0, 72.5, 56.2, 31.4, 30.6, 30.1, 29.6, 22.6.

**<sup>19</sup>F NMR** (564 MHz, Chloroform-*d*): δ -62.90.

**HRMS** (ESI): *m/z* calcd for C<sub>30</sub>H<sub>26</sub>F<sub>3</sub>N<sub>4</sub>O [M-Br]<sup>+</sup>: 515.2053 found 515.2051.

**FT-IR** (cm<sup>-1</sup>): 2925, 2853, 1649, 1414, 1336, 1134, 728.

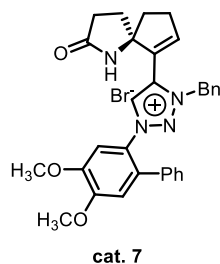

**cat. 7** was obtained in 79% yield as a brownish solid.

**TLC**: *R<sub>f</sub>* = 0.2 (DCM: MeOH = 10:1).

**m.p.**: 135.0-136.4 °C.

**[α]<sub>D</sub><sup>26</sup>** = +32.0 (*c* = 0.5, CHCl<sub>3</sub>).

**<sup>1</sup>H NMR** (600 MHz, Chloroform-*d*): δ 8.73 (s, 1H), 7.78 (s, 1H), 7.41-7.28 (m, 6H), 7.15 (d, *J* = 8.6 Hz, 2H), 6.96-6.87 (m, 3H), 5.98 (d, *J* = 15.0 Hz, 1H), 5.79 (d, *J* = 15.0 Hz, 1H), 4.02 (s, 3H), 3.97 (s, 3H), 2.66-2.58 (m, 1H), 2.48-2.40 (m, 1H), 2.22-2.15 (m, 1H), 2.10-2.07 (m, 1H), 1.91 (ddd, *J* = 17.2, 9.0, 3.4 Hz, 1H), 1.71-1.64 (m, 1H), 1.35-1.30 (m, 1H), 1.26 (t, *J* = 7.2 Hz, 1H).

**<sup>13</sup>C NMR** (150 MHz, Chloroform-*d*): δ 144.4, 136.2, 131.9, 130.9, 130.6, 129.4, 129.3, 129.0, 128.6, 128.2, 128.2, 127.9, 125.2, 112.6, 110.4, 56.3, 55.9, 31.5, 30.5, 30.0.

**HRMS** (ESI): *m/z* calcd for C<sub>31</sub>H<sub>31</sub>N<sub>4</sub>O<sub>3</sub> [M-Br]<sup>+</sup>: 507.2391 found 507.2380.

**FT-IR** (cm<sup>-1</sup>): 2923, 1642, 1453, 1215, 1013, 748.

## 4. Optimization Studies of $\alpha$ -Hydroxylation of Pyridinone-Fused Lactones

**Table S3.** Optimization of catalysts<sup>a, b, c</sup>

|                                 |                                 |                                 |                                 |
|---------------------------------|---------------------------------|---------------------------------|---------------------------------|
|                                 |                                 |                                 |                                 |
| <p><b>cat. 1</b><br/>48% ee</p> | <p><b>cat. 2</b><br/>14% ee</p> | <p><b>cat. 3</b><br/>63% ee</p> | <p><b>cat. 4</b><br/>73% ee</p> |
| <p><b>cat. 5</b><br/>68% ee</p> | <p><b>cat. 6</b><br/>33% ee</p> | <p><b>cat. 7</b><br/>41% ee</p> |                                 |

<sup>a</sup>Unless otherwise noted, the reaction was conducted with **1a** (0.1 mmol, 1.0 equiv.), **cat.** (10 mol%), CHP (1.5 equiv.), K<sub>2</sub>CO<sub>3</sub> (1.0 equiv.) in 2 mL toluene at 0 °C for 48 h. <sup>b</sup>Isolated yield. <sup>c</sup>ee determined by UPC<sup>2</sup>.

**Table S4.** Optimization of temperatures<sup>a</sup>

| <div><div>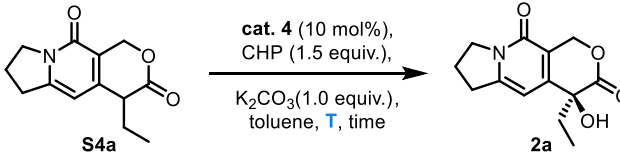</div><div>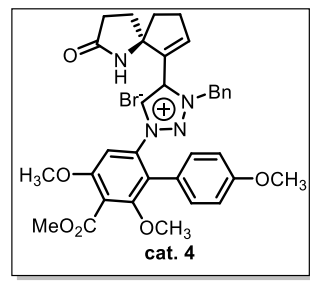</div></div> |        |             |                        |                     |
|------------------------------------------------------------------------------------------------------------------------------------------------------------------------------------------------------|--------|-------------|------------------------|---------------------|
| entry                                                                                                                                                                                                | T (°C) | time (hour) | yield (%) <sup>b</sup> | ee (%) <sup>c</sup> |
| 1                                                                                                                                                                                                    | 20     | 24          | 93                     | 68                  |
| 2                                                                                                                                                                                                    | 0      | 48          | 93                     | 73                  |
| 3                                                                                                                                                                                                    | -35    | 100         | 92                     | 81                  |

<sup>a</sup>Unless otherwise noted, the reaction was conducted with **1a** (0.1 mmol, 1.0 equiv.), **cat. 4** (10 mol%), CHP (1.5 equiv.), K<sub>2</sub>CO<sub>3</sub> (1.0 equiv.) in 2 mL toluene. <sup>b</sup>Isolated yield. <sup>c</sup>ee determined by UPC<sup>2</sup>.

**Table S5.** Optimization of solvent and oxidant<sup>a</sup>

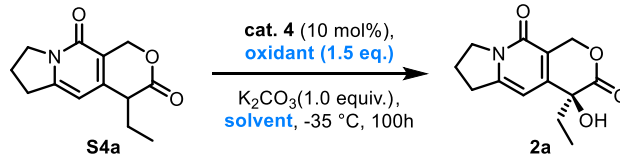

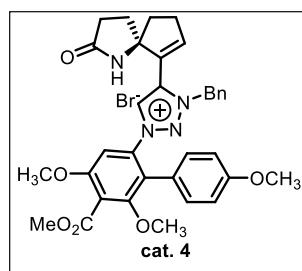

**cat. 4**

| entry           | solvent             | oxidant                       | yield (%) <sup>b</sup> | ee (%) <sup>c</sup> |
|-----------------|---------------------|-------------------------------|------------------------|---------------------|
| 1               | toluene             | CHP                           | 92                     | 81                  |
| 2               | ethylbenzene        | CHP                           | 81                     | 74                  |
| 3               | m-xylene            | CHP                           | 63                     | 56                  |
| 4               | mesitylene          | CHP                           | 85                     | 80                  |
| 5               | 1,2-difluorobenzene | CHP                           | 54                     | 69                  |
| 6               | chlorobenzene       | CHP                           | 75                     | 78                  |
| 7               | DCM                 | CHP                           | 15                     | 21                  |
| 8               | THF                 | CHP                           | trace                  | 6                   |
| 9               | MTBE                | CHP                           | trace                  | 17                  |
| 10              | EA                  | CHP                           | trace                  | 0                   |
| 11              | toluene             | <i>t</i> -BuOOH               | 21                     | 31                  |
| 12              | toluene             | H <sub>2</sub> O <sub>2</sub> | --                     | NR                  |
| 13              | toluene             | Oxone                         | 11                     | 3                   |
| 14              | toluene             | UHP                           | trace                  | 17                  |
| 15 <sup>d</sup> | toluene             | CHP                           | 92                     | 83                  |
| 16 <sup>e</sup> | toluene             | CHP                           | 85                     | 80                  |

<sup>a</sup>Unless otherwise noted, the reaction was conducted with **1a** (0.1 mmol, 1.0 equiv.), **cat. 4** (10 mol%), CHP (0.15 mmol, 1.5 equiv.), K<sub>2</sub>CO<sub>3</sub> (0.1 mmol, 1.0 equiv.) in 2 mL solvent. <sup>b</sup>Isolated yield. <sup>c</sup>ee determined by UPC<sup>2</sup>. <sup>d</sup>CHP (0.12 mmol, 1.2 equiv.) was used. <sup>e</sup>CHP (0.2 mmol, 2.0 equiv.) was used.

**Table S6.** Optimization of base and additives<sup>a</sup>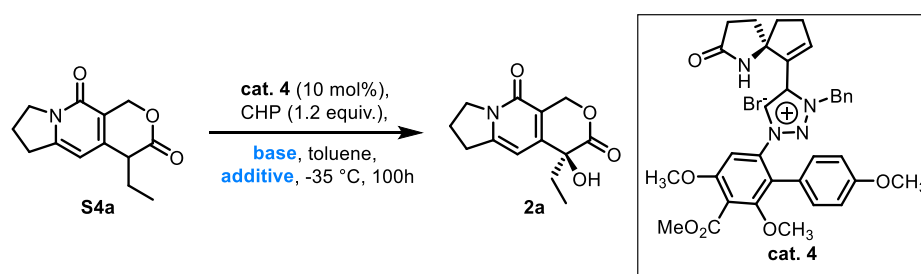

| entry           | base                                             | additive                             | yield(%) <sup>b</sup> | ee% <sup>c</sup>    |
|-----------------|--------------------------------------------------|--------------------------------------|-----------------------|---------------------|
| 1               | K <sub>2</sub> HPO <sub>4</sub>                  | --                                   | 34                    | 54                  |
| 2               | K <sub>3</sub> PO <sub>4</sub>                   | --                                   | 91                    | 84                  |
| 3               | K <sub>3</sub> PO <sub>4</sub> ·H <sub>2</sub> O | --                                   | 85                    | 83                  |
| 4               | Cs <sub>2</sub> CO <sub>3</sub>                  | --                                   | 31                    | 60                  |
| 5               | CsOH·H <sub>2</sub> O                            | --                                   | trace                 | 17                  |
| 6               | K <sub>2</sub> CO <sub>3</sub>                   | --                                   | 92                    | 83                  |
| 7               | Na <sub>2</sub> CO <sub>3</sub>                  | --                                   | 54                    | 80                  |
| 8               | DBU                                              | --                                   | --                    | ND                  |
| 9               | K <sub>3</sub> PO <sub>4</sub>                   | DMF(20μl)                            | 30                    | 50                  |
| 10              | K <sub>3</sub> PO <sub>4</sub>                   | DMSO(20μl)                           | 30                    | 33                  |
| 11              | K <sub>3</sub> PO <sub>4</sub>                   | 1,4-Dioxane(20μl)                    | 42                    | 55                  |
| 12              | K <sub>3</sub> PO <sub>4</sub>                   | 18-Crown-6(3mg)                      | 92                    | 0                   |
| 13              | K <sub>3</sub> PO <sub>4</sub>                   | MgSO <sub>4</sub> (5mg)              | 90                    | 83                  |
| 14              | K <sub>3</sub> PO <sub>4</sub>                   | Phenol(3mg)                          | 33                    | 25                  |
| 15              | K <sub>3</sub> PO <sub>4</sub>                   | Span 20(4mg)                         | 87                    | 80                  |
| 16              | K <sub>3</sub> PO <sub>4</sub>                   | CHCl <sub>3</sub> (50μl)             | 91                    | 87                  |
| <sup>d</sup> 22 | K <sub>3</sub> PO <sub>4</sub>                   | CHCl <sub>3</sub> (50μl)+4Å MS(5mg)  | 92                    | 90, 99 <sup>c</sup> |
| 21              | K <sub>3</sub> PO <sub>4</sub>                   | CHCl <sub>3</sub> (200μl)+4Å MS(5mg) | 81                    | 83                  |

<sup>a</sup>Unless otherwise noted, the reaction was conducted with **1a** (0.1 mmol, 1.0 equiv.), **cat. 4** (10 mol%), CHP (0.12 mmol, 1.2 equiv.), base (0.1 mmol, 1.0 equiv.), and additive in 2 mL toluene.

<sup>b</sup>Isolated yield. <sup>c</sup>ee determined by UPC<sup>2</sup>. <sup>d</sup>ee increased to 99% after a single recrystallization

## 5. Experimental Details for the Synthesis of Lactones 2a-2t

To a solution of **1a** (0.1 mmol, 1.0 equiv.) in toluene (1 mL) was added  $\text{CHCl}_3$  (50  $\mu\text{L}$ ),  $\text{K}_2\text{CO}_3$  (0.1 mmol, 1.0 equiv.), and 4 Å MS (activated powder, 5 mg) at room temperature. The mixture was stirred at room temperature for 5 min and cooled to  $-35\text{ }^\circ\text{C}$  followed by dropwise addition of a suspension of **cat. 4** (10 mol%) in toluene (1 mL) over a course of 5 min. The mixture was stirred for another 30 min and was added cumene hydroperoxide (0.12 mmol, 1.2 equiv.). The resulting mixture was stirred at  $-35\text{ }^\circ\text{C}$  for 100 h. The reaction was quenched by  $\text{Na}_2\text{S}_2\text{O}_3$  and  $\text{NH}_4\text{Cl}$  solution and stirred at room temperature for 1 h. The organic phase was separated, and the aqueous phase was extracted with chloroform (30 mL  $\times$  3). The organic layers were combined, dried over  $\text{Na}_2\text{SO}_4$ , and concentrated in vacuo. The residue was purified by flash chromatography on silica gel to give **2a-2t**

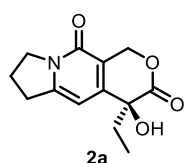

**2a** was obtained in 92% yield as a white solid.<sup>4</sup>

TLC:  $R_f = 0.3$  (DCM: MeOH = 30:1).

$[\alpha]_D^{23} = +123.3$  ( $c = 0.3$ ,  $\text{CHCl}_3$ ).

Enantiomeric excess was 90% and increased to >99% after a single recrystallization determined by the chiral UPC<sup>2</sup> analysis (Trefoil<sup>®</sup> CEL 2,  $\text{CO}_2/\text{MeOH} = 80/20$ ,  $v = 2.0\text{ mL/min}$ ,  $\lambda = 205.0\text{ nm}$ ,  $t_{\text{major}} = 2.848\text{ min}$ ,  $t_{\text{minor}} = 4.317\text{ min}$ ).

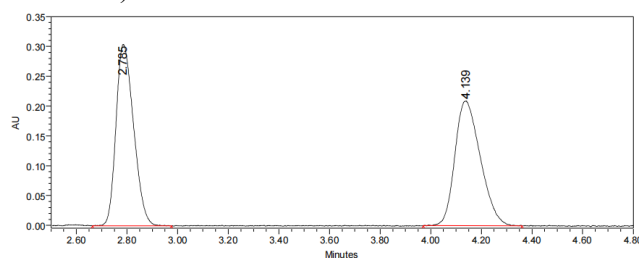

peak information:

|   | RetTime<br>(min) | Area<br>( $\mu\text{V}\cdot\text{s}$ ) | Area<br>(%) | Height<br>( $\mu\text{V}$ ) |
|---|------------------|----------------------------------------|-------------|-----------------------------|
| 1 | 2.785            | 1467316                                | 50.05       | 304023                      |
| 2 | 4.139            | 1464244                                | 49.95       | 209267                      |

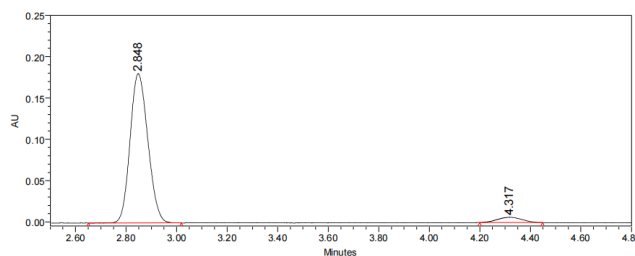

peak information:

|   | RetTime<br>(min) | Area<br>( $\mu\text{V}\cdot\text{s}$ ) | Area<br>(%) | Height<br>( $\mu\text{V}$ ) |
|---|------------------|----------------------------------------|-------------|-----------------------------|
| 1 | 2.848            | 885028                                 | 95.34       | 180669                      |
| 2 | 4.317            | 43243                                  | 4.66        | 6401                        |

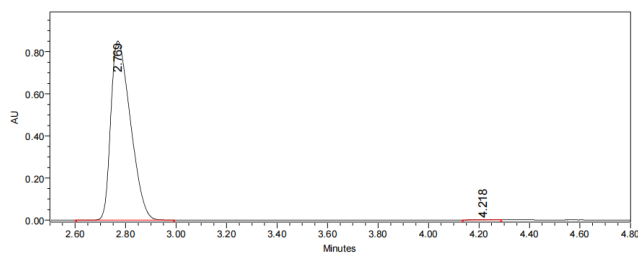

peak information:

|   | RetTime<br>(min) | Area<br>( $\mu\text{V}\cdot\text{s}$ ) | Area<br>(%) | Height<br>( $\mu\text{V}$ ) |
|---|------------------|----------------------------------------|-------------|-----------------------------|
| 1 | 2.769            | 4590612                                | 99.87       | 850628                      |
| 2 | 4.218            | 5991                                   | 0.13        | 1211                        |

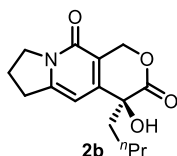

**2b** was obtained in 89% yield as a white solid.

**TLC:**  $R_f$  = 0.3 (DCM: MeOH = 30:1).

**m.p.:** 186.0-187.0 °C.

$[\alpha]_D^{25} = +74.0$  ( $c = 0.5$ ,  $\text{CHCl}_3$ ).

**$^1\text{H}$  NMR** (400 MHz, Chloroform- $d$ ):  $\delta$  6.49 (s, 1H), 5.59 (d,  $J = 15.8$  Hz, 1H), 5.17 (d,  $J = 15.8$  Hz, 1H), 4.17 (td,  $J = 7.2, 3.2$  Hz, 2H), 3.73 (s, 1H), 3.14 (t,  $J = 8.8$  Hz, 1H), 2.23 (q,  $J = 7.6$  Hz, 2H), 1.79-1.69 (m, 2H), 1.38-1.26 (m, 4H), 0.88 (t,  $J = 7.2$  Hz, 3H).

**$^{13}\text{C}$  NMR** (150 MHz, Chloroform- $d$ ):  $\delta$  174.3, 158.2, 151.1, 149.6, 115.3, 98.1, 72.3, 66.3, 48.8, 37.9, 31.9, 25.2, 22.4, 21.4, 13.7.

**HRMS** (ESI):  $m/z$  calcd for  $\text{C}_{15}\text{H}_{19}\text{NNaO}_4$   $[\text{M}+\text{Na}]^+$ : 300.1206, found 300.1214.

**FT-IR** ( $\text{cm}^{-1}$ ): 3396, 2924, 1743, 1649, 1572, 1119, 669.

Enantiomeric excess was 91% determined by the chiral HPLC analysis (IA-3, Hexane/Isopropanol = 80/20,  $v = 1.0$  mL/min,  $\lambda = 235.0$  nm,  $t_{\text{minor}} = 12.448$  min,  $t_{\text{major}} = 15.347$ ).

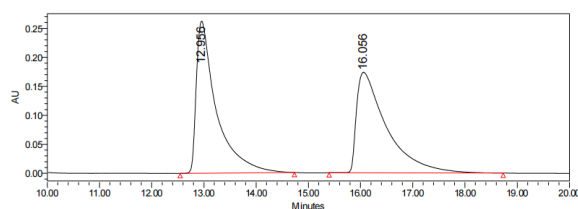

peak information

|   | RetTime<br>(min) | Area<br>( $\mu\text{V}\cdot\text{s}$ ) | Area<br>(%) | Height<br>( $\mu\text{V}$ ) |
|---|------------------|----------------------------------------|-------------|-----------------------------|
| 1 | 12.956           | 6903055                                | 50.23       | 261815                      |
| 2 | 16.056           | 6929490                                | 49.77       | 173379                      |

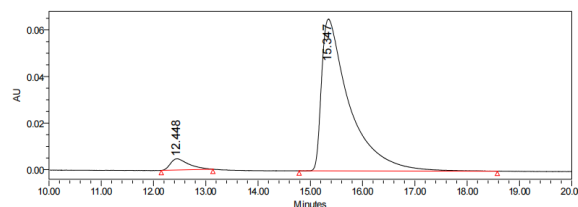

peak information

|   | RetTime<br>(min) | Area<br>( $\mu\text{V}\cdot\text{s}$ ) | Area<br>(%) | Height<br>( $\mu\text{V}$ ) |
|---|------------------|----------------------------------------|-------------|-----------------------------|
| 1 | 12.448           | 117521                                 | 4.63        | 4844                        |
| 2 | 15.347           | 2418977                                | 95.37       | 65153                       |

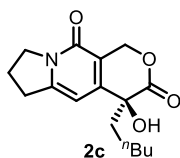

**2c** was obtained in 80% yield as a yellow oil.

**TLC:**  $R_f$  = 0.3 (DCM: MeOH = 30:1).

$[\alpha]_D^{25}$  = +33.3 ( $c$  = 0.3,  $\text{CHCl}_3$ ).

**$^1\text{H}$  NMR** (600 MHz,  $\text{Chloroform-}d$ ):  $\delta$  6.46 (s, 1H), 5.55 (d,  $J$  = 15.8 Hz, 1H), 5.13 (d,  $J$  = 15.8 Hz, 1H), 4.19–4.10 (m, 2H), 3.83 (s, 1H), 3.12 (t,  $J$  = 7.8 Hz, 2H), 2.21 (quint,  $J$  = 7.2 Hz, 2H), 1.73 (td,  $J$  = 14.4, 5.4 Hz, 1H), 1.68 (td,  $J$  = 11.4, 5.4 Hz, 1H), 1.42–1.29 (m, 2H), 1.29–1.16 (m, 6H), 0.83 (t,  $J$  = 6.6 Hz, 3H).

**$^{13}\text{C}$  NMR** (150 MHz,  $\text{Chloroform-}d$ ):  $\delta$  174.2, 158.1, 151.0, 149.5, 115.2, 97.9, 72.3, 66.3, 48.7, 38.1, 31.9, 31.4, 28.9, 23.1, 22.4, 21.4, 13.9.

**HRMS** (ESI):  $m/z$  calcd for  $\text{C}_{17}\text{H}_{23}\text{NNaO}_4$   $[\text{M}+\text{Na}]^+$ : 328.1519, found 328.1513.

**FT-IR** ( $\text{cm}^{-1}$ ): 3375, 2928, 2856, 1747, 1650, 1573, 1467, 1149, 828, 726.

Enantiomeric excess was 89% determined by the chiral UPC<sup>2</sup> analysis (Trefoil<sup>®</sup> CEL 2,  $\text{CO}_2/\text{MeOH}$  = 80/20,  $v$  = 2.0 mL/min,  $\lambda$  = 205.0 nm,  $t_{\text{major}}$  = 2.718 min,  $t_{\text{minor}}$  = 4.737 min).

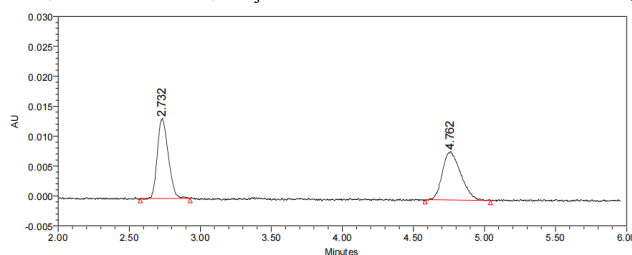

peak information:

|   | RetTime<br>(min) | Area<br>( $\mu\text{V}\cdot\text{s}$ ) | Area<br>(%) | Height<br>( $\mu\text{V}$ ) |
|---|------------------|----------------------------------------|-------------|-----------------------------|
| 1 | 2.732            | 72221                                  | 49.95       | 13323                       |
| 2 | 4.762            | 72354                                  | 50.05       | 8097                        |

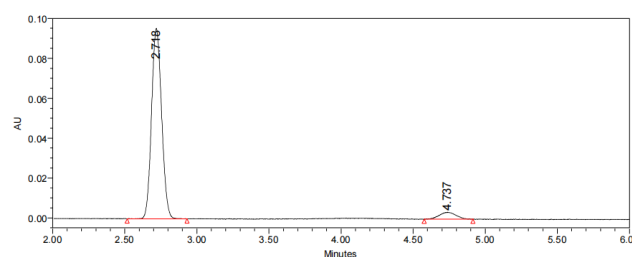

peak information:

|   | RetTime<br>(min) | Area<br>( $\mu\text{V}\cdot\text{s}$ ) | Area<br>(%) | Height<br>( $\mu\text{V}$ ) |
|---|------------------|----------------------------------------|-------------|-----------------------------|
| 1 | 2.718            | 461397                                 | 94.31       | 95330                       |
| 2 | 4.737            | 27841                                  | 5.69        | 3425                        |

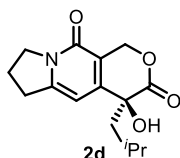

**2d** was obtained in 53% yield as a white solid.

**TLC:**  $R_f$  = 0.3 (DCM: MeOH = 30:1).

**m.p.:** 151.5–153.2 °C.

$[\alpha]_D^{25} = +26.7$  ( $c = 0.3$ ,  $\text{CHCl}_3$ ).

**$^1\text{H}$  NMR** (600 MHz,  $\text{Chloroform-}d$ ):  $\delta$  6.51 (s, 1H), 5.61 (d,  $J = 15.6$  Hz, 1H), 5.15 (d,  $J = 15.6$  Hz, 1H), 4.21-4.10 (m,  $J = 6.8$  Hz, 2H), 3.70 (s, 1H), 3.14 (t,  $J = 7.8$  Hz, 2H), 2.23 (quint,  $J = 7.6$  Hz, 2H), 1.86-1.77 (m, 1H), 1.73 (dd,  $J = 14.4, 5.0$  Hz, 1H), 1.57 (dd,  $J = 14.4, 6.9$  Hz, 1H), 0.96 (d,  $J = 6.6$  Hz, 3H), 0.89 (d,  $J = 6.6$  Hz, 3H).

**$^{13}\text{C}$  NMR** (150 MHz,  $\text{Chloroform-}d$ ):  $\delta$  174.7, 158.2, 151.2, 150.3, 115.3, 97.8, 72.7, 66.2, 48.8, 46.3, 31.9, 24.4, 23.9, 23.3, 21.4.

**HRMS** (ESI):  $m/z$  calcd for  $\text{C}_{15}\text{H}_{19}\text{NNaO}_4$   $[\text{M}+\text{Na}]^+$ : 300.1206, found 300.1218.

**FT-IR** ( $\text{cm}^{-1}$ ): 3442, 2923, 1746, 1650, 1573, 1468, 1125, 1039, 751, 637.

Enantiomeric excess was 90% determined by the chiral HPLC analysis (IA-3, Hexane/Isopropanol = 80/20,  $v = 1.0$  mL/min,  $\lambda = 305.0$  nm,  $t_{\text{minor}} = 12.291$ ,  $t_{\text{major}} = 15.428$  min).

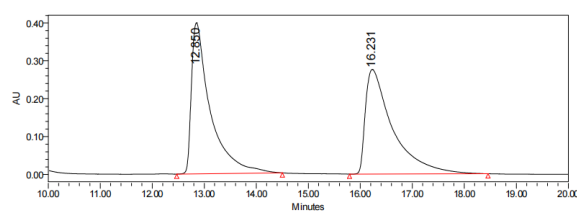

| peak information |               |                                     |                          |
|------------------|---------------|-------------------------------------|--------------------------|
|                  | RetTime (min) | Area ( $\mu\text{V}\cdot\text{s}$ ) | Height ( $\mu\text{V}$ ) |
| 1                | 12.291        | 10059024                            | 368798                   |
| 2                | 16.231        | 10028206                            | 276210                   |

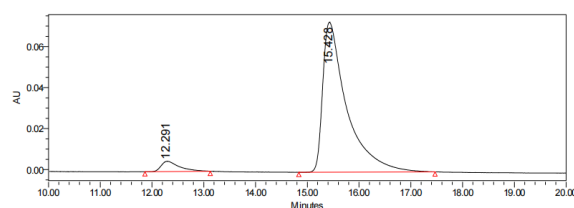

| peak information |               |                                     |                          |
|------------------|---------------|-------------------------------------|--------------------------|
|                  | RetTime (min) | Area ( $\mu\text{V}\cdot\text{s}$ ) | Height ( $\mu\text{V}$ ) |
| 1                | 12.291        | 123137                              | 4.98                     |
| 2                | 15.428        | 2348060                             | 95.02                    |

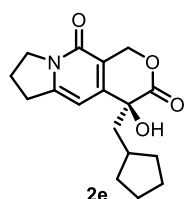

**2e** was obtained in 65% yield as a pale yellow solid.

**TLC**:  $R_f = 0.3$  (DCM: MeOH = 30:1).

**m.p.**: 168.2-169.5 °C.

$[\alpha]_D^{25} = +17.5$  ( $c = 0.4$ ,  $\text{CHCl}_3$ ).

**$^1\text{H}$  NMR** (400 MHz,  $\text{Chloroform-}d$ ):  $\delta$  6.50 (s, 1H), 5.61 (d,  $J = 15.6$  Hz, 1H), 5.16 (d,  $J = 15.6$  Hz, 1H), 4.16 (td,  $J = 7.2, 2.4$  Hz, 2H), 3.69 (s, 1H), 3.14 (t,  $J = 7.8$  Hz, 2H), 2.24 (quint,  $J = 7.6$  Hz, 2H), 1.96-1.82 (m, 3H), 1.79-1.71 (m, 2H), 1.66-1.43 (m, 5H), 1.13-1.03 (m, 2H).

**$^{13}\text{C}$  NMR** (150 MHz,  $\text{Chloroform-}d$ ):  $\delta$  174.7, 158.2, 151.2, 150.2, 115.3, 97.8, 72.7, 66.2, 48.7, 44.3, 35.2, 33.9, 33.3, 31.9, 25.0, 24.9, 21.4.

**HRMS** (ESI):  $m/z$  calcd for  $\text{C}_{17}\text{H}_{21}\text{NNaO}_4$   $[\text{M}+\text{Na}]^+$ : 326.1363, found 326.1360.

**FT-IR** ( $\text{cm}^{-1}$ ): 3443, 2923, 2853, 1745, 1650, 1573, 1467, 1141, 1075, 751, 669.

Enantiomeric excess was 77% determined by the chiral HPLC analysis (IA-3, Hexane/Isopropanol = 80/20,  $v = 1.0$  mL/min,  $\lambda = 305.0$  nm,  $t_{\text{minor}} = 15.054$ ,  $t_{\text{major}} = 22.853$  min).

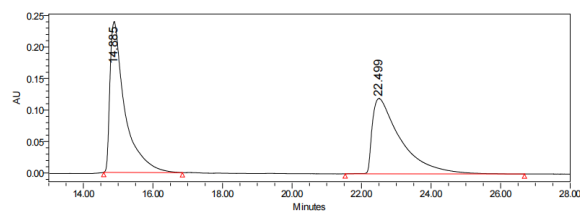

peak information

|   | RetTime (min) | Area ( $\mu\text{V}\cdot\text{s}$ ) | Area (%) | Height ( $\mu\text{V}$ ) |
|---|---------------|-------------------------------------|----------|--------------------------|
| 1 | 14.885        | 7083952                             | 51.06    | 239129                   |
| 2 | 22.489        | 6789059                             | 48.94    | 119722                   |

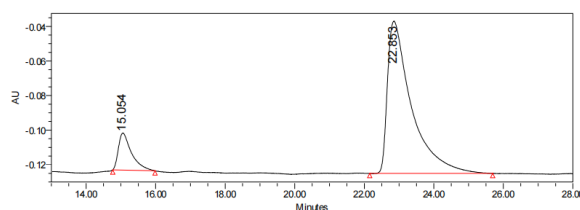

peak information

|   | RetTime (min) | Area ( $\mu\text{V}\cdot\text{s}$ ) | Area (%) | Height ( $\mu\text{V}$ ) |
|---|---------------|-------------------------------------|----------|--------------------------|
| 1 | 15.054        | 556945                              | 11.66    | 21402                    |
| 2 | 22.853        | 4218629                             | 88.34    | 88001                    |

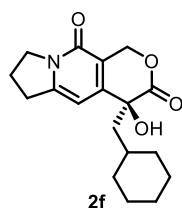

**2f** was obtained in 71% yield as a pale yellow solid.

**TLC:**  $R_f = 0.3$  (DCM: MeOH = 30:1).

**m.p.:** 170.0-171.6 °C.

$[\alpha]_D^{25} = +20.0$  ( $c = 0.5$ ,  $\text{CHCl}_3$ ).

**$^1\text{H}$  NMR** (600 MHz, Chloroform- $d$ ):  $\delta$  6.50 (s, 1H), 5.58 (d,  $J = 15.6$  Hz, 1H), 5.13 (d,  $J = 15.6$  Hz, 1H), 4.15 (h,  $J = 5.8$  Hz, 2H), 3.81 (s, 1H), 3.12 (t,  $J = 7.8$  Hz, 2H), 2.22 (quint,  $J = 7.5$  Hz, 2H), 1.77 (d,  $J = 12.4$  Hz, 1H), 1.71-1.55 (m, 6H), 1.52-1.44 (m, 1H), 1.25-1.16 (m, 2H), 1.13-1.04 (m, 1H), 0.96-0.86 (m, 2H).

**$^{13}\text{C}$  NMR** (150 MHz, Chloroform- $d$ ):  $\delta$  174.6, 151.2, 115.3, 97.8, 72.5, 66.1, 48.8, 45.2, 34.8, 33.8, 32.9, 31.9, 26.0, 25.9, 21.4.

**HRMS** (ESI):  $m/z$  calcd for  $\text{C}_{18}\text{H}_{23}\text{NNaO}_4$   $[\text{M}+\text{Na}]^+$ : 340.1519, found 340.1529.

**FT-IR** ( $\text{cm}^{-1}$ ): 3441, 2923, 2850, 1746, 1650, 1573, 1447, 1221, 1147, 1037, 948, 828, 733.

Enantiomeric excess was 81% determined by the chiral UPC<sup>2</sup> analysis (Trefoil<sup>®</sup> CEL 2,  $\text{CO}_2/\text{MeOH} = 80/20$ ,  $v = 2.0$  mL/min,  $\lambda = 205.0$  nm,  $t_{\text{major}} = 3.569$  min,  $t_{\text{minor}} = 7.302$  min).

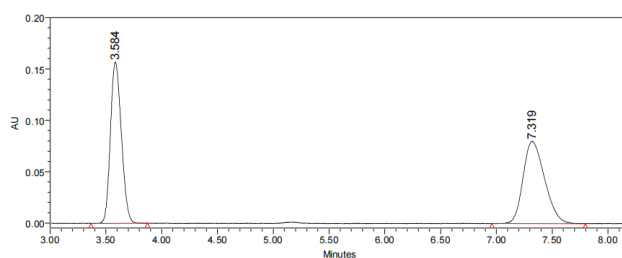

peak information:

|   | RetTime<br>(min) | Area<br>( $\mu V \cdot s$ ) | Area<br>(%) | Height<br>( $\mu V$ ) |
|---|------------------|-----------------------------|-------------|-----------------------|
| 1 | 3.584            | 1068804                     | 50.01       | 156881                |
| 2 | 7.319            | 1068402                     | 49.99       | 79927                 |

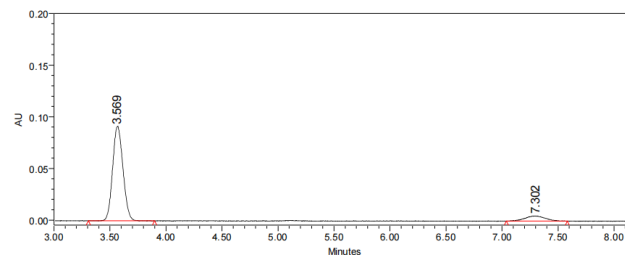

peak information:

|   | RetTime<br>(min) | Area<br>( $\mu V \cdot s$ ) | Area<br>(%) | Height<br>( $\mu V$ ) |
|---|------------------|-----------------------------|-------------|-----------------------|
| 1 | 3.569            | 588095                      | 90.60       | 91253                 |
| 2 | 7.302            | 60984                       | 9.40        | 4819                  |

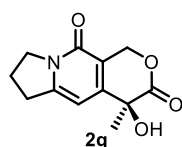

**2g** was obtained in 45% yield as a white solid.

**TLC:**  $R_f$  = 0.3 (DCM: MeOH = 30:1).

**m.p.:** 207.0-208.4 °C.

$[\alpha]_D^{25}$  = +10.0 ( $c$  = 0.3,  $CHCl_3$ ).

**$^1H$  NMR** (600 MHz, Chloroform- $d$ ):  $\delta$  6.52 (s, 1H), 5.62 (d,  $J$  = 15.8 Hz, 1H), 5.15 (d,  $J$  = 15.8 Hz, 1H), 4.17 (h,  $J$  = 5.6 Hz, 2H), 3.14 (t,  $J$  = 7.8 Hz, 2H), 2.24 (quint,  $J$  = 7.2 Hz, 2H), 1.55 (s, 3H).

**$^{13}C$  NMR** (150 MHz, Chloroform- $d$ ):  $\delta$  174.8, 158.1, 151.6, 149.9, 115.1, 97.1, 69.3, 66.2, 48.8, 32.0, 26.0, 21.4.

**HRMS** (ESI):  $m/z$  calcd for  $C_{12}H_{13}NO_4$   $[M+H]^+$ : 236.0917, found 236.0917.

**FT-IR** ( $cm^{-1}$ ): 3448, 2923, 2851, 1737, 1641, 1552, 1258, 1075, 749, 668.

Enantiomeric excess was 74% determined by the chiral UPC<sup>2</sup> analysis (Trefoil<sup>®</sup> CEL 2,  $CO_2/MeOH$  = 85/15,  $v$  = 2.0 mL/min,  $\lambda$  = 205.0 nm,  $t_{major}$  = 4.769 min,  $t_{minor}$  = 6.706 min).

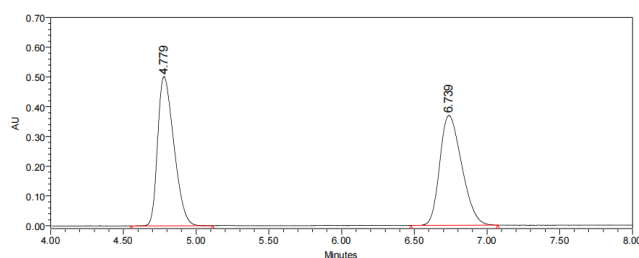

peak information:

|   | RetTime<br>(min) | Area<br>( $\mu V \cdot s$ ) | Area<br>(%) | Height<br>( $\mu V$ ) |
|---|------------------|-----------------------------|-------------|-----------------------|
| 1 | 4.779            | 3885331                     | 49.99       | 501245                |
| 2 | 6.739            | 3887442                     | 50.01       | 369676                |

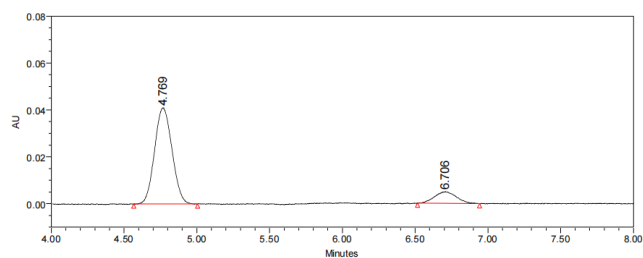

peak information:

|   | RetTime<br>(min) | Area<br>( $\mu V \cdot s$ ) | Area<br>(%) | Height<br>( $\mu V$ ) |
|---|------------------|-----------------------------|-------------|-----------------------|
| 1 | 4.769            | 342003                      | 86.84       | 40963                 |
| 2 | 6.706            | 51821                       | 13.16       | 4993                  |

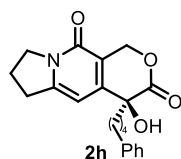

**2h** was obtained in 83% yield as a white oil.

**TLC:**  $R_f$  = 0.3 (DCM: MeOH = 30:1).

$[\alpha]_D^{25}$  = +13.3 ( $c$  = 0.3,  $CHCl_3$ ).

**$^1H$  NMR** (600 MHz, Chloroform- $d$ ):  $\delta$  7.28-7.24 (m, 3H), 7.17 (t,  $J$  = 7.8 Hz, 1H), 7.12 (d,  $J$  = 7.8 Hz, 1H), 6.45 (s, 1H), 5.59 (d,  $J$  = 15.8 Hz, 1H), 5.14 (d,  $J$  = 15.8 Hz, 1H), 4.16 (d,  $J$  = 7.2 Hz, 2H), 3.66 (s, 1H), 3.12 (t,  $J$  = 8.4 Hz, 2H), 2.57 (t,  $J$  = 8.4 Hz, 2H), 2.23 (t,  $J$  = 8.0 Hz, 2H), 1.83-1.70 (m, 2H), 1.65-1.52 (m, 3H), 1.49-1.37 (m, 2H).

**$^{13}C$  NMR** (150 MHz, Chloroform- $d$ ):  $\delta$  174.2, 158.1, 151.1, 149.4, 141.9, 128.3, 128.3, 125.8, 115.3, 97.9, 72.2, 66.4, 48.7, 37.8, 35.6, 31.9, 31.1, 22.9, 21.4.

**HRMS** (ESI):  $m/z$  calcd for  $C_{21}H_{23}NNaO_4$   $[M+Na]^+$ : 376.1519, found 376.1525.

**FT-IR** ( $cm^{-1}$ ): 3450, 2967, 2924, 1737, 1657, 1572, 1460, 1366, 1225, 1045, 796, 663.

Enantiomeric excess was 90% determined by the chiral UPC<sup>2</sup> analysis (Trefoil<sup>®</sup> CEL 2,  $CO_2/MeOH$  = 80/20,  $v$  = 2.0 mL/min,  $\lambda$  = 205.0 nm,  $t_{major}$  = 6.193 min,  $t_{minor}$  = 10.483 min).

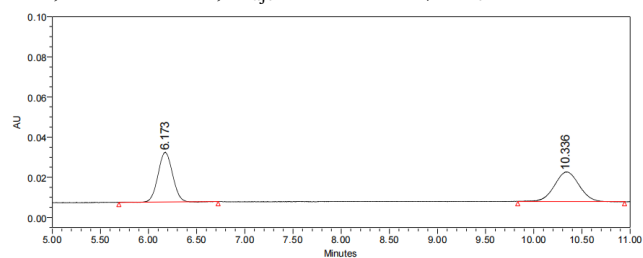

peak information:

|   | RetTime<br>(min) | Area<br>( $\mu V \cdot s$ ) | Area<br>(%) | Height<br>( $\mu V$ ) |
|---|------------------|-----------------------------|-------------|-----------------------|
| 1 | 6.173            | 260210                      | 49.94       | 24742                 |
| 2 | 10.336           | 260815                      | 50.06       | 14722                 |

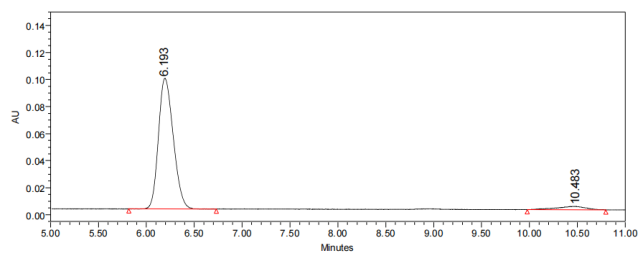

peak information:

|   | RetTime (min) | Area (μV*s) | Area (%) | Height (μV) |
|---|---------------|-------------|----------|-------------|
| 1 | 6.193         | 1041454     | 95.13    | 96539       |
| 2 | 10.483        | 53354       | 4.87     | 2438        |

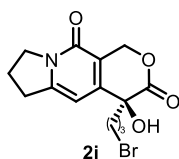

**2i** was obtained in 81% yield as a yellow oil.

**TLC:**  $R_f$  = 0.3 (DCM: MeOH = 30:1).

$[\alpha]_D^{25}$  = +20.0 ( $c$  = 0.5, CHCl<sub>3</sub>).

**<sup>1</sup>H NMR** (600 MHz, Chloroform-*d*):  $\delta$  6.47 (s, 1H), 5.63 (d,  $J$  = 15.6 Hz, 1H), 5.20 (d,  $J$  = 15.6 Hz, 1H), 4.17 (h,  $J$  = 7.2 Hz, 2H), 3.71 (s, 1H), 3.40 (t,  $J$  = 6.0 Hz, 2H), 3.15 (t,  $J$  = 7.8 Hz, 2H), 2.24 (q,  $J$  = 7.8 Hz, 2H), 2.03-1.98 (m, 1H), 1.96-1.87 (m, 3H).

**<sup>13</sup>C NMR** (150 MHz, Chloroform-*d*):  $\delta$  174.0, 158.1, 151.4, 149.0, 115.4, 97.7, 71.8, 66.4, 48.8, 36.3, 32.8, 32.0, 26.4, 21.4.

**HRMS** (ESI):  $m/z$  calcd for C<sub>14</sub>H<sub>16</sub>BrNNaO<sub>4</sub> [M+Na]<sup>+</sup>: 364.0155, found 364.0168.

**FT-IR** (cm<sup>-1</sup>): 3563, 2962, 2851, 1745, 1580, 1468, 1180, 1029, 799, 668.

Enantiomeric excess was 94% determined by the chiral UPC<sup>2</sup> analysis (Trefoil<sup>®</sup> CEL 2, CO<sub>2</sub>/MeOH = 80/20,  $v$  = 2.0 mL/min,  $\lambda$  = 205.0 nm,  $t_{\text{major}}$  = 4.195 min,  $t_{\text{minor}}$  = 6.603 min).

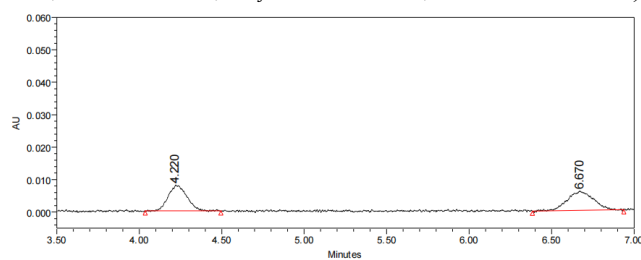

peak information:

|   | RetTime (min) | Area (μV*s) | Area (%) | Height (μV) |
|---|---------------|-------------|----------|-------------|
| 1 | 4.220         | 62630       | 49.21    | 7930        |
| 2 | 6.670         | 64634       | 50.79    | 6837        |

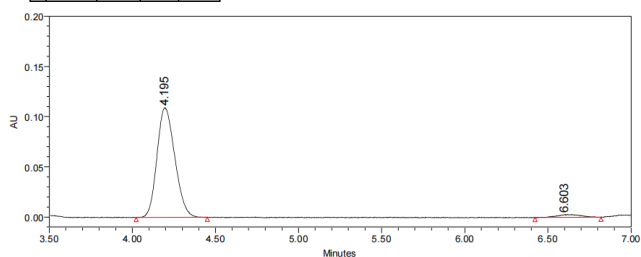

peak information:

|   | RetTime (min) | Area (μV*s) | Area (%) | Height (μV) |
|---|---------------|-------------|----------|-------------|
| 1 | 4.195         | 814764      | 96.94    | 109086      |
| 2 | 6.603         | 25722       | 3.06     | 2696        |

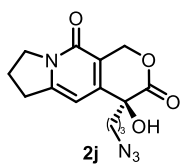

**2j** was obtained in 85% yield as a white oil.

**TLC:**  $R_f$  = 0.3 (DCM: MeOH = 30:1).

$[\alpha]_D^{25}$  = +14.0 ( $c$  = 0.5, CHCl<sub>3</sub>).

**<sup>1</sup>H NMR** (600 MHz, Chloroform-*d*):  $\delta$  6.47 (s, 1H), 5.61 (d,  $J$  = 15.6 Hz, 1H), 5.17 (d,  $J$  = 15.6 Hz, 1H), 4.19-4.10 (m, 2H), 3.76 (s, 1H), 3.36-3.26 (m, 2H), 3.15 (t,  $J$  = 7.8 Hz, 2H), 2.24 (quint,  $J$  = 7.8 Hz, 2H), 1.87-1.76 (m, 2H), 1.75-1.66 (m, 2H).

**<sup>13</sup>C NMR** (150 MHz, Chloroform-*d*):  $\delta$  174.0, 158.1, 151.4, 148.9, 115.4, 97.7, 71.8, 66.4, 50.9, 48.7, 34.9, 32.0, 23.0, 21.4.

**HRMS** (ESI):  $m/z$  calcd for C<sub>14</sub>H<sub>16</sub>N<sub>4</sub>NaO<sub>4</sub> [M+Na]<sup>+</sup>: 327.1064, found 327.1063.

**FT-IR** (cm<sup>-1</sup>): 3444, 2926, 2098, 1744, 1648, 1573, 1466, 1231, 1142, 1035, 795, 665.

Enantiomeric excess was 78% determined by the chiral UPC<sup>2</sup> analysis (Trefoil<sup>®</sup> CEL 2, CO<sub>2</sub>/MeOH = 80/20,  $v$  = 2.0 mL/min,  $\lambda$  = 205.0 nm,  $t_{\text{major}}$  = 3.565 min,  $t_{\text{minor}}$  = 5.532 min).

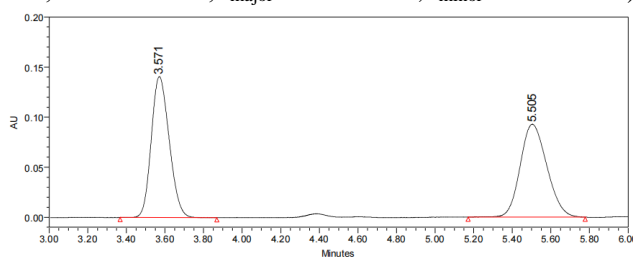

peak information:

|   | RetTime<br>(min) | Area<br>( $\mu$ V*s) | Area<br>(%) | Height<br>( $\mu$ V) |
|---|------------------|----------------------|-------------|----------------------|
| 1 | 3.571            | 910260               | 50.62       | 140701               |
| 2 | 5.505            | 888062               | 49.38       | 92602                |

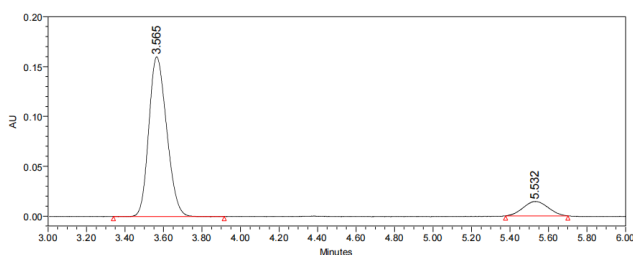

peak information:

|   | RetTime<br>(min) | Area<br>( $\mu$ V*s) | Area<br>(%) | Height<br>( $\mu$ V) |
|---|------------------|----------------------|-------------|----------------------|
| 1 | 3.565            | 1033235              | 88.80       | 160112               |
| 2 | 5.532            | 130255               | 11.20       | 14454                |

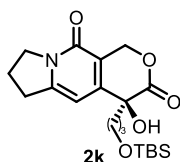

**2k** was obtained in 88% yield as a light yellow oil.

**TLC:**  $R_f$  = 0.3 (DCM: MeOH = 30:1).

$[\alpha]_D^{25}$  = +38.0 ( $c$  = 0.5, CHCl<sub>3</sub>).

**<sup>1</sup>H NMR** (600 MHz, Chloroform-*d*): δ 6.51 (s, 1H), 5.60 (d, *J* = 15.8 Hz, 1H), 5.16 (d, *J* = 15.8 Hz, 1H), 4.22-4.13 (m, 2H), 4.04 (s, 1H), 3.61 (t, *J* = 6.0 Hz, 2H), 3.14 (t, *J* = 7.8 Hz, 2H), 2.24 (quint, *J* = 7.2 Hz, 2H), 1.90-1.78 (m, 2H), 1.68-1.60 (m, 2H), 0.87 (s, 9H), 0.03 (s, 6H).

**<sup>13</sup>C NMR** (150 MHz, Chloroform-*d*): δ 171.4, 158.4, 150.5, 146.9, 117.2, 100.0, 65.8, 62.1, 48.6, 44.1, 31.8, 29.6, 27.6, 25.8, 21.4, 18.2, -5.3.

**HRMS** (ESI): *m/z* calcd for C<sub>20</sub>H<sub>31</sub>NNaO<sub>5</sub>Si [M+Na]<sup>+</sup>: 416.1864, found 416.1854.

**FT-IR** (cm<sup>-1</sup>): 3441, 2923, 1734, 1653, 1576, 1465, 1410, 1088, 1035, 798, 750.

Enantiomeric excess was 90% determined by the chiral UPC<sup>2</sup> analysis (Trefoil® CEL 2, CO<sub>2</sub>/MeOH = 80/20, *v* = 2.0 mL/min, λ = 205.0 nm, *t*<sub>major</sub> = 1.992 min, *t*<sub>minor</sub> = 3.638 min).

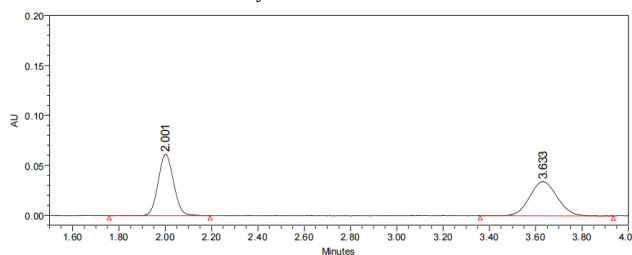

peak information:

|   | RetTime (min) | Area (μV*s) | Area (%) | Height (μV) |
|---|---------------|-------------|----------|-------------|
| 1 | 2.001         | 285158      | 50.41    | 61362       |
| 2 | 3.633         | 280489      | 49.59    | 34066       |

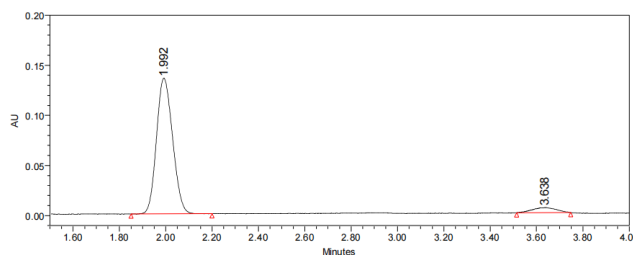

peak information:

|   | RetTime (min) | Area (μV*s) | Area (%) | Height (μV) |
|---|---------------|-------------|----------|-------------|
| 1 | 1.992         | 655218      | 94.85    | 135327      |
| 2 | 3.638         | 35570       | 5.15     | 4927        |

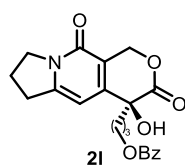

**2l** was obtained in 40% yield as a pale yellow solid.

**TLC**: *R<sub>f</sub>* = 0.3 (DCM: MeOH = 30:1).

**m.p.**: 141.9-143.5 °C.

[α]<sub>D</sub><sup>25</sup> = +6.7 (*c* = 0.3, CHCl<sub>3</sub>).

**<sup>1</sup>H NMR** (600 MHz, Chloroform-*d*): δ 7.99 (d, *J* = 6.6 Hz, 2H), 7.57 (t, *J* = 7.4 Hz, 1H), 7.44 (t, *J* = 7.8 Hz, 2H), 6.50 (s, 1H), 5.63 (d, *J* = 15.6 Hz, 1H), 5.18 (d, *J* = 15.6 Hz, 1H), 4.32 (t, *J* = 4.4 Hz, 2H), 4.16 (td, *J* = 7.2, 3.0 Hz, 2H), 3.73 (s, 1H), 3.15 (t, *J* = 8.4 Hz, 2H), 2.24 (quint, *J* = 7.2 Hz, 3H), 1.93-1.87 (m, 3H).

**<sup>13</sup>C NMR** (150 MHz, Chloroform-*d*): δ 174.1, 151.4, 133.1, 129.5, 128.4, 71.9, 66.4, 64.0, 48.8, 34.5, 32.0, 22.9, 21.4.

**HRMS** (ESI): *m/z* calcd for C<sub>21</sub>H<sub>21</sub>NNaO<sub>6</sub> [M+Na]<sup>+</sup>: 406.1261, found 406.1250.

**FT-IR** (cm<sup>-1</sup>): 3447, 1645, 1455, 1276, 1119, 1040, 714.

Enantiomeric excess was 74% determined by the chiral UPC<sup>2</sup> analysis (Trefoil® CEL 2, CO<sub>2</sub>/MeOH = 80/20,  $\nu$  = 2.0 mL/min,  $\lambda$  = 205.0 nm,  $t_{\text{major}}$  = 10.647 min,  $t_{\text{minor}}$  = 13.572 min).

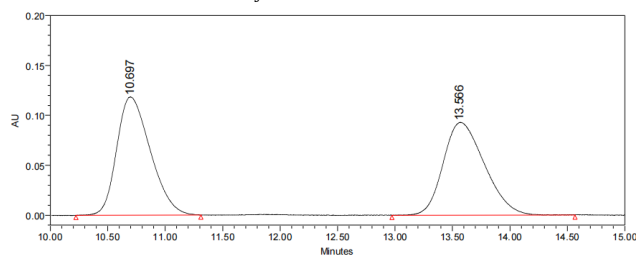

peak information:

|   | RetTime<br>(min) | Area<br>( $\mu\text{V}\cdot\text{s}$ ) | Area<br>(%) | Height<br>( $\mu\text{V}$ ) |
|---|------------------|----------------------------------------|-------------|-----------------------------|
| 1 | 10.697           | 2409337                                | 50.98       | 118280                      |
| 2 | 13.566           | 2316593                                | 49.02       | 92734                       |

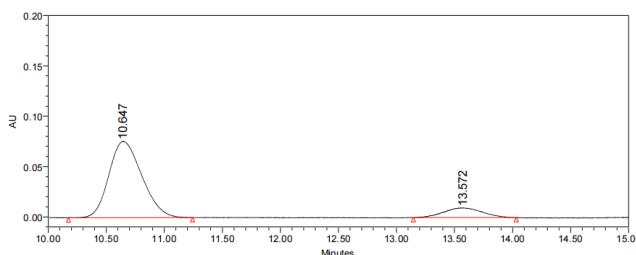

peak information:

|   | RetTime<br>(min) | Area<br>( $\mu\text{V}\cdot\text{s}$ ) | Area<br>(%) | Height<br>( $\mu\text{V}$ ) |
|---|------------------|----------------------------------------|-------------|-----------------------------|
| 1 | 10.647           | 1493649                                | 87.15       | 75781                       |
| 2 | 13.572           | 220184                                 | 12.85       | 9603                        |

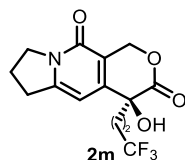

**2m** was obtained in 84% yield as a white solid.

**TLC**:  $R_f$  = 0.3 (DCM: MeOH = 30:1).

**m.p.**: 213.7-214.8 °C.

$[\alpha]_D^{25}$  = +26.7 ( $c$  = 0.3, CHCl<sub>3</sub>).

**<sup>1</sup>H NMR** (600 MHz, Chloroform-*d*):  $\delta$  6.45 (s, 1H), 5.64 (d,  $J$  = 16.0 Hz, 1H), 5.19 (d,  $J$  = 16.0 Hz, 1H), 4.17 (td,  $J$  = 7.2, 4.8 Hz, 2H), 3.78 (s, 1H), 3.16 (t,  $J$  = 7.4 Hz, 2H), 2.35-2.23 (m, 3H), 2.22-2.14 (m, 1H), 1.98 (dtd,  $J$  = 26.2, 13.6, 6.8 Hz, 1H).

**<sup>13</sup>C NMR** (150 MHz, Chloroform-*d*):  $\delta$  173.4, 158.1, 151.8, 148.1, 126.6 (q,  $J$  = 273.0 Hz), 115.6, 97.5, 70.7, 66.5, 48.9, 32.0, 30.1, 28.3 (d,  $J$  = 28.5 Hz), 21.4.

**<sup>19</sup>F NMR** (564 MHz, Chloroform-*d*):  $\delta$  -66.16.

**HRMS** (ESI):  $m/z$  calcd for C<sub>14</sub>H<sub>14</sub>F<sub>3</sub>NNaO<sub>4</sub> [M+Na]<sup>+</sup>: 340.0767, found 340.0774.

**FT-IR** (cm<sup>-1</sup>): 3440, 2924, 2853, 1749, 1652, 1576, 1448, 1256, 1140, 1103, 751, 636.

Enantiomeric excess was 90% determined by the chiral UPC<sup>2</sup> analysis (Trefoil® CEL 2, CO<sub>2</sub>/MeOH = 80/20,  $\nu$  = 2.0 mL/min,  $\lambda$  = 205.0 nm,  $t_{\text{major}}$  = 1.162 min,  $t_{\text{minor}}$  = 1.925 min).

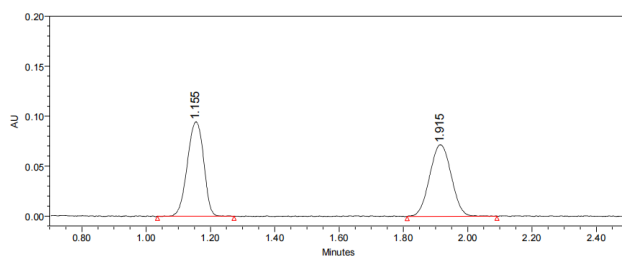

peak information:

|   | RetTime (min) | Area (μV*s) | Area (%) | Height (μV) |
|---|---------------|-------------|----------|-------------|
| 1 | 1.155         | 333402      | 49.93    | 94388       |
| 2 | 1.915         | 334305      | 50.07    | 71525       |

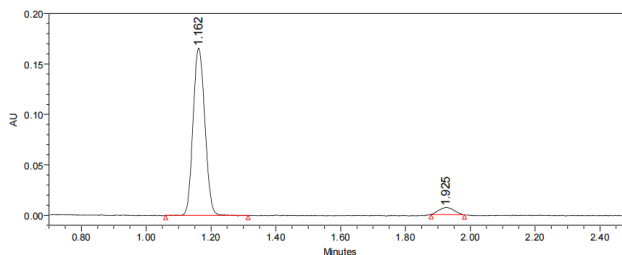

peak information:

|   | RetTime (min) | Area (μV*s) | Area (%) | Height (μV) |
|---|---------------|-------------|----------|-------------|
| 1 | 1.162         | 419056      | 94.78    | 165615      |
| 2 | 1.925         | 23103       | 5.22     | 7079        |

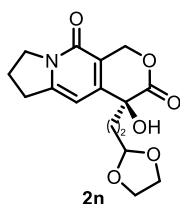

**2n** was obtained in 79% yield as a light yellow solid.

**TLC:**  $R_f$  = 0.3 (DCM: MeOH = 30:1).

**m.p.:** 192.4-193.5 °C.

$[\alpha]_D^{25}$  = +70.0 ( $c$  = 0.3, CHCl<sub>3</sub>).

**<sup>1</sup>H NMR** (600 MHz, Chloroform-*d*):  $\delta$  6.47 (s, 1H), 5.60 (d,  $J$  = 15.8 Hz, 1H), 5.18 (d,  $J$  = 15.8 Hz, 1H), 4.87 (t,  $J$  = 4.2 Hz, 1H), 4.20-4.11 (m, 2H), 3.94 (s, 2H), 3.84 (d,  $J$  = 7.4 Hz, 3H), 3.13 (t,  $J$  = 7.8 Hz, 2H), 2.24 (q,  $J$  = 7.6 Hz, 2H), 1.91-1.83 (m, 3H), 1.73-1.68 (m, 1H).

**<sup>13</sup>C NMR** (150 MHz, Chloroform-*d*):  $\delta$  174.1, 158.2, 151.1, 149.1, 115.6, 103.3, 97.9, 71.7, 66.3, 65.0, 48.7, 31.9, 31.6, 27.5, 21.4.

**HRMS** (ESI):  $m/z$  calcd for C<sub>16</sub>H<sub>19</sub>NNaO<sub>6</sub> [M+Na]<sup>+</sup>: 344.1105, found 344.1104.

**FT-IR** (cm<sup>-1</sup>): 3442, 1642, 1467, 1413, 1141, 1033, 749.

Enantiomeric excess was 80% determined by the chiral UPC<sup>2</sup> analysis (Trefoil<sup>®</sup> CEL 2, CO<sub>2</sub>/MeOH = 80/20,  $v$  = 2.0 mL/min,  $\lambda$  = 205.0 nm,  $t_{\text{major}}$  = 4.870 min,  $t_{\text{minor}}$  = 7.788 min).

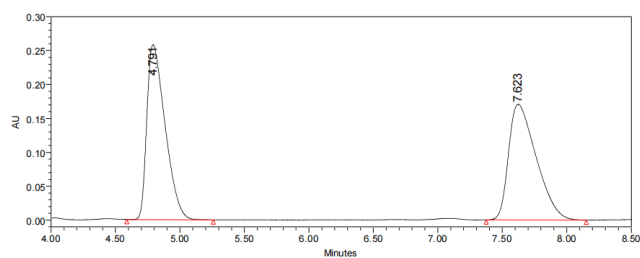

peak information:

|   | RetTime (min) | Area (μV*s) | Area (%) | Height (μV) |
|---|---------------|-------------|----------|-------------|
| 1 | 4.791         | 2533082     | 49.96    | 257881      |
| 2 | 7.623         | 2536800     | 50.04    | 170542      |

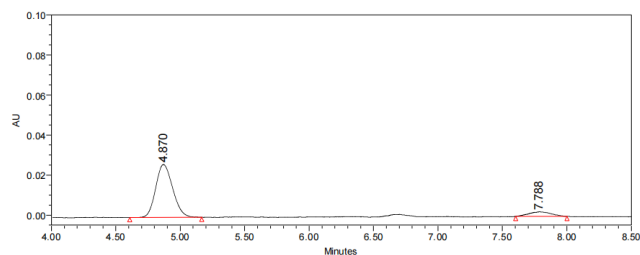

peak information:

|   | RetTime (min) | Area (μV*s) | Area (%) | Height (μV) |
|---|---------------|-------------|----------|-------------|
| 1 | 4.870         | 242744      | 90.00    | 26430       |
| 2 | 7.788         | 26977       | 10.00    | 2255        |

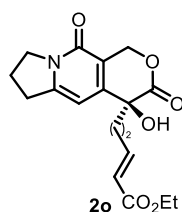

**2o** was obtained in 82% yield as a white oil.

**TLC:**  $R_f$  = 0.3 (DCM: MeOH = 30:1).

$[\alpha]_D^{28}$  = +28.0 (c = 0.5, CHCl<sub>3</sub>).

**<sup>1</sup>H NMR** (600 MHz, Chloroform-*d*): δ 6.87 (dt,  $J$  = 14.4, 6.8 Hz, 1H), 6.48 (s, 1H), 5.80 (d,  $J$  = 15.6 Hz, 1H), 5.62 (d,  $J$  = 16.0 Hz, 1H), 5.17 (d,  $J$  = 16.0 Hz, 1H), 4.17 (q,  $J$  = 7.0 Hz, 4H), 3.77 (s, 1H), 3.15 (t,  $J$  = 8.4 Hz, 2H), 2.39-2.28 (m, 2H), 2.24 (quint,  $J$  = 7.4 Hz, 2H), 1.92 (td,  $J$  = 13.8, 5.4 Hz, 1H), 1.84 (td,  $J$  = 10.8, 6.0 Hz, 1H), 1.27 (t,  $J$  = 7.2 Hz, 4H).

**<sup>13</sup>C NMR** (150 MHz, Chloroform-*d*): δ 173.8, 166.2, 158.1, 151.4, 148.8, 146.3, 122.4, 115.4, 97.9, 71.8, 66.5, 60.3, 48.9, 36.0, 32.0, 26.1, 21.4, 14.2.

**HRMS** (ESI):  $m/z$  calcd for C<sub>18</sub>H<sub>21</sub>NNaO<sub>6</sub> [M+Na]<sup>+</sup>: 406.1261, found 406.1250.

**FT-IR** (cm<sup>-1</sup>): 3448, 2061, 1639, 1260, 1036, 749.

Enantiomeric excess was 80% determined by the chiral HPLC analysis (IA-3, Hexane/Isopropanol = 80/20,  $v$  = 1.0 mL/min,  $\lambda$  = 305.0 nm,  $t_{\text{major}}$  = 24.127,  $t_{\text{minor}}$  = 32.420 min).

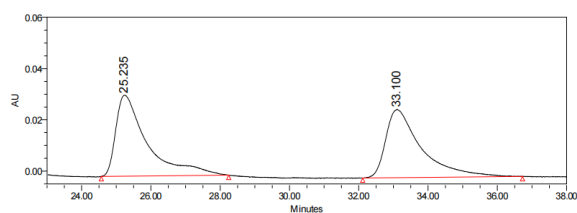

peak information

|   | RetTime (min) | Area (μV*s) | Area (%) | Height (μV) |
|---|---------------|-------------|----------|-------------|
| 1 | 25.235        | 1989436     | 51.23    | 31612       |
| 2 | 33.100        | 1803654     | 48.77    | 29534       |

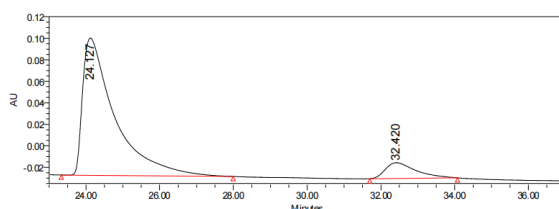

peak information

|   | RetTime (min) | Area (μV*s) | Area (%) | Height (μV) |
|---|---------------|-------------|----------|-------------|
| 1 | 24.127        | 7729360     | 90.17    | 127500      |
| 2 | 32.420        | 842542      | 9.83     | 14678       |

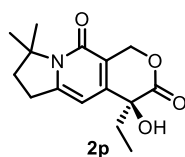

**2p** was obtained in 91% yield as a white solid.

**TLC:**  $R_f$  = 0.6 (DCM: MeOH = 30:1).

**m.p.:** 66.5-68.0 °C.

$[\alpha]_D^{25}$  = +58.3 (c = 0.5, CHCl<sub>3</sub>).

**<sup>1</sup>H NMR** (600 MHz, Chloroform-*d*): δ 6.38 (s, 1H), 5.58 (d,  $J$  = 15.8 Hz, 1H), 5.15 (d,  $J$  = 15.8 Hz, 1H), 3.63 (s, 1H), 3.02 (t,  $J$  = 7.8 Hz, 2H), 2.08 (t,  $J$  = 5.4 Hz, 2H), 1.83-1.76 (m, 2H), 1.71 (s, 3H), 1.67 (s, 3H), 0.97 (t,  $J$  = 7.4 Hz, 3H).

**<sup>13</sup>C NMR** (150 MHz, Chloroform-*d*): δ 174.3, 158.8, 151.2, 148.9, 116.7, 97.8, 72.4, 69.1, 66.5, 37.8, 31.3, 28.6, 25.6, 25.4, 7.7.

**HRMS** (ESI):  $m/z$  calcd for C<sub>15</sub>H<sub>20</sub>NO<sub>4</sub> [M+H]<sup>+</sup>: 278.1387, found 278.1379.

**FT-IR** (cm<sup>-1</sup>): 3393, 2971, 2935, 1745, 1650, 1570, 1456, 1229, 1148, 1045, 798, 734, 668.

Enantiomeric excess was 92% determined by the chiral HPLC analysis (IA-3, Hexane/Isopropanol = 80/20,  $v$  = 1.0 mL/min,  $\lambda$  = 240.0 nm,  $t_{major}$  = 31.188,  $t_{minor}$  = 42.323 min).

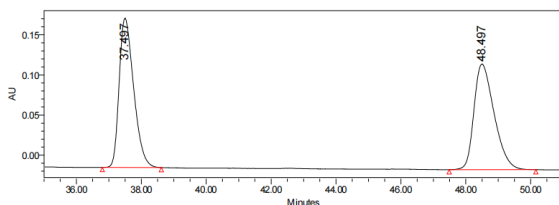

peak information

|   | RetTime (min) | Area (μV*s) | Area (%) | Height (μV) |
|---|---------------|-------------|----------|-------------|
| 1 | 37.497        | 5767391     | 50.40    | 185794      |
| 2 | 48.497        | 5675406     | 49.60    | 131585      |

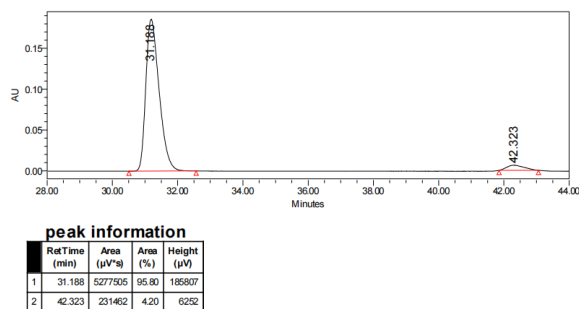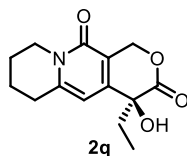

**2q** was obtained in 65% yield as a light yellow oil.

**TLC:**  $R_f$  = 0.5 (DCM: MeOH = 30:1).

$[\alpha]_D^{25}$  = +20.0 ( $c$  = 0.3,  $\text{CHCl}_3$ ).

**$^1\text{H}$  NMR** (400 MHz,  $\text{Chloroform-}d$ ):  $\delta$  6.36 (s, 1H), 5.58 (d,  $J$  = 16.0 Hz, 1H), 5.16 (d,  $J$  = 16.0 Hz, 1H), 4.10-3.94 (m, 2H), 3.63 (s, 1H), 2.85 (t,  $J$  = 6.4 Hz, 2H), 2.04-1.91 (m, 2H), 1.87-1.76 (m, 4H), 0.97 (t,  $J$  = 7.4 Hz, 3H).

**$^{13}\text{C}$  NMR** (150 MHz,  $\text{Chloroform-}d$ ):  $\delta$  174.2, 159.5, 148.4, 147.5, 114.6, 101.5, 72.2, 66.8, 41.8, 31.6, 29.1, 22.0, 18.5, 7.7.

**HRMS** (ESI):  $m/z$  calcd for  $\text{C}_{14}\text{H}_{17}\text{NNaO}_4$   $[\text{M}+\text{Na}]^+$ : 286.1050, found 286.1061.

**FT-IR** ( $\text{cm}^{-1}$ ): 3448, 2924, 1740, 1644, 1560, 1464, 1156, 1036, 840, 667.

Enantiomeric excess was 87% determined by the chiral UPC<sup>2</sup> analysis (Trefoil<sup>®</sup> CEL 2,  $\text{CO}_2/\text{MeOH}$  = 80/20,  $v$  = 2.0 mL/min,  $\lambda$  = 205.0 nm,  $t_{\text{major}}$  = 2.566 min,  $t_{\text{minor}}$  = 4.100 min).

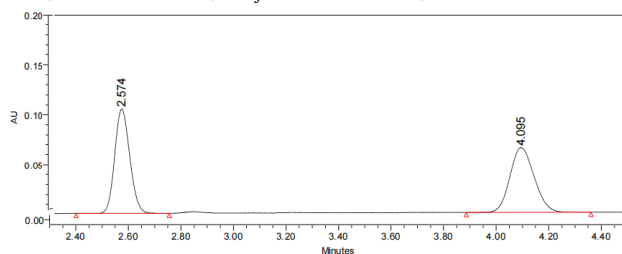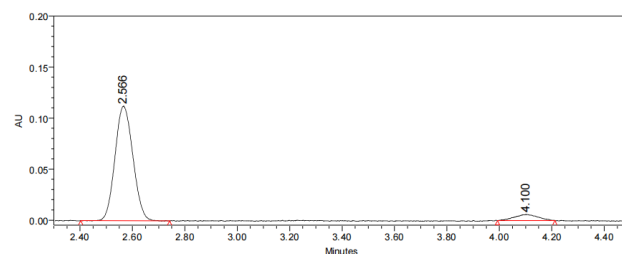

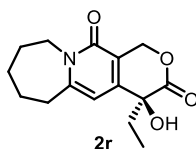

**2r** was obtained in 51% yield as a white solid.

**TLC:**  $R_f$  = 0.5 (DCM: MeOH = 30:1).

**m.p.:** 79.6-81.0 °C.

$[\alpha]_D^{25}$  = +43.3 ( $c$  = 0.3, CHCl<sub>3</sub>).

**<sup>1</sup>H NMR** (400 MHz, Chloroform-*d*):  $\delta$  6.35 (s, 1H), 5.55 (d,  $J$  = 16.0 Hz, 1H), 5.15 (d,  $J$  = 16.0 Hz, 1H), 4.50 (dd,  $J$  = 14.4, 7.4 Hz, 1H), 4.25 (dd,  $J$  = 14.4, 8.8 Hz, 1H), 3.60 (s, 1H), 2.90-2.78 (m, 2H), 1.88-1.66 (m, 9H), 0.96 (t,  $J$  = 7.4 Hz, 3H).

**<sup>13</sup>C NMR** (100 MHz, Chloroform-*d*):  $\delta$  174.1, 159.5, 153.0, 147.6, 115.4, 101.9, 72.1, 67.1, 43.7, 35.3, 31.6, 29.6, 27.6, 26.9, 7.7.

**HRMS** (ESI):  $m/z$  calcd for C<sub>15</sub>H<sub>20</sub>NO<sub>4</sub> [M+H]<sup>+</sup>: 278.1387, found 278.1390.

**FT-IR** (cm<sup>-1</sup>): 3448, 2056, 1638, 1122, 710.

Enantiomeric excess was 90% determined by the chiral UPC<sup>2</sup> analysis (Trefoil<sup>®</sup> CEL 2, CO<sub>2</sub>/MeOH = 80/20,  $v$  = 2.0 mL/min,  $\lambda$  = 210.0 nm,  $t_{\text{major}}$  = 2.345 min,  $t_{\text{minor}}$  = 3.608 min).

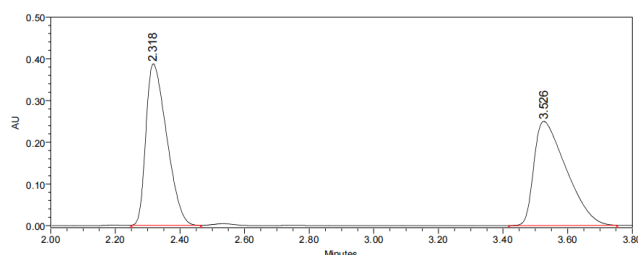

peak information:

|   | RetTime<br>(min) | Area<br>( $\mu$ V*s) | Area<br>(%) | Height<br>( $\mu$ V) |
|---|------------------|----------------------|-------------|----------------------|
| 1 | 2.318            | 1727983              | 49.99       | 386757               |
| 2 | 3.526            | 1728509              | 50.01       | 249562               |

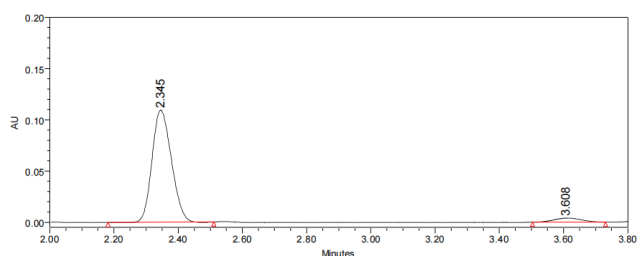

peak information:

|   | RetTime<br>(min) | Area<br>( $\mu$ V*s) | Area<br>(%) | Height<br>( $\mu$ V) |
|---|------------------|----------------------|-------------|----------------------|
| 1 | 2.345            | 460228               | 95.13       | 109466               |
| 2 | 3.608            | 23547                | 4.87        | 4010                 |

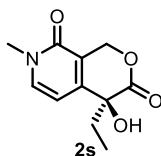

**2s** was obtained in 35% yield as a white solid.

**TLC:**  $R_f$  = 0.4 (DCM: MeOH = 30:1).

**m.p.:** 150.0-151.7 °C.

$[\alpha]_D^{25} = +20.0$  ( $c = 0.3$ ,  $\text{CHCl}_3$ ).

**$^1\text{H}$  NMR** (600 MHz,  $\text{Chloroform-}d$ ):  $\delta$  7.38 (d,  $J = 6.6$  Hz, 1H), 6.51 (d,  $J = 7.2$  Hz, 1H), 5.60 (d,  $J = 16.2$  Hz, 1H), 5.18 (d,  $J = 16.2$  Hz, 1H), 3.62 (s, 1H), 3.59 (s, 3H), 1.83-1.76 (m, 2H), 0.97 (t,  $J = 7.4$  Hz, 3H).

**$^{13}\text{C}$  NMR** (150 MHz,  $\text{Chloroform-}d$ ):  $\delta$  148.5, 138.4, 118.7, 102.7, 72.1, 66.6, 37.6, 31.6, 7.6.

**HRMS** (ESI):  $m/z$  calcd for  $\text{C}_{11}\text{H}_{14}\text{NO}_4$   $[\text{M}+\text{H}]^+$ : 224.0917, found 224.0917.

**FT-IR** ( $\text{cm}^{-1}$ ): 3448, 2921, 2851, 1641, 1412, 1118, 668.

Enantiomeric excess was 66% determined by the chiral UPC<sup>2</sup> analysis (Trefoil<sup>®</sup> CEL 2,  $\text{CO}_2/\text{MeOH} = 80/20$ ,  $v = 2.0$  mL/min,  $\lambda = 205.0$  nm,  $t_{\text{major}} = 1.699$  min,  $t_{\text{minor}} = 2.095$  min).

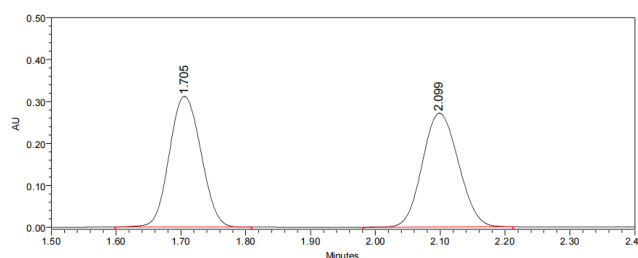

peak information:

| RetTime (min) | Area ( $\mu\text{V}\cdot\text{s}$ ) | Area (%) | Height ( $\mu\text{V}$ ) |
|---------------|-------------------------------------|----------|--------------------------|
| 1 1.705       | 1057759                             | 50.16    | 311480                   |
| 2 2.099       | 1051051                             | 49.84    | 271348                   |

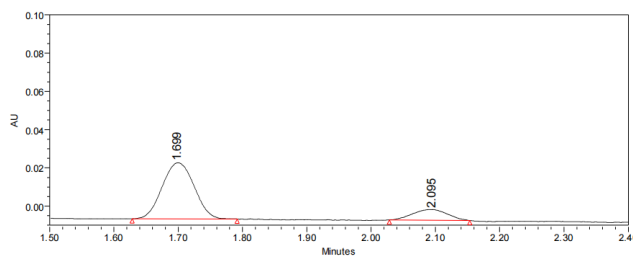

peak information:

| RetTime (min) | Area ( $\mu\text{V}\cdot\text{s}$ ) | Area (%) | Height ( $\mu\text{V}$ ) |
|---------------|-------------------------------------|----------|--------------------------|
| 1 1.699       | 101439                              | 82.91    | 29330                    |
| 2 2.095       | 20905                               | 17.09    | 5574                     |

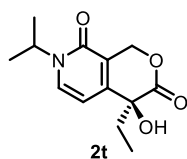

**2t** was obtained in 31% yield as a white solid.

**TLC**:  $R_f = 0.4$  (DCM: MeOH = 30:1).

**m.p.**: 155.7-157.6 °C.

$[\alpha]_D^{25} = +40.0$  ( $c = 0.3$ ,  $\text{CHCl}_3$ ).

**$^1\text{H}$  NMR** (600 MHz,  $\text{Chloroform-}d$ ):  $\delta$  7.43 (d,  $J = 7.2$  Hz, 1H), 6.57 (d,  $J = 7.2$  Hz, 1H), 5.61 (d,  $J = 16.2$  Hz, 1H), 5.28 (quint,  $J = 6.6$  Hz, 1H), 5.18 (d,  $J = 16.2$  Hz, 1H), 3.59 (s, 1H), 1.84-1.76 (m, 2H), 1.39 (d,  $J = 6.8$  Hz, 3H), 1.37 (d,  $J = 6.8$  Hz, 3H), 0.98 (t,  $J = 7.4$  Hz, 3H).

**$^{13}\text{C}$  NMR** (150 MHz,  $\text{Chloroform-}d$ ):  $\delta$  173.9, 158.3, 147.5, 133.1, 118.5, 102.9, 72.0, 66.9, 46.8, 31.5, 22.0, 21.9, 7.7.

**HRMS** (ESI):  $m/z$  calcd for  $\text{C}_{13}\text{H}_{17}\text{NNaO}_4$   $[\text{M}+\text{Na}]^+$ : 274.1050, found 274.1053.

**FT-IR** ( $\text{cm}^{-1}$ ): 3442, 2977, 2853, 1744, 1651, 1562, 1462, 1154, 1044, 882, 796, 659.

Enantiomeric excess was 75% determined by the chiral UPC<sup>2</sup> analysis (Trefoil<sup>®</sup> CEL 2, CO<sub>2</sub>/MeOH = 80/20,  $v = 2.0$  mL/min,  $\lambda = 205.0$  nm,  $t_{\text{major}} = 0.996$  min,  $t_{\text{minor}} = 1.336$  min)

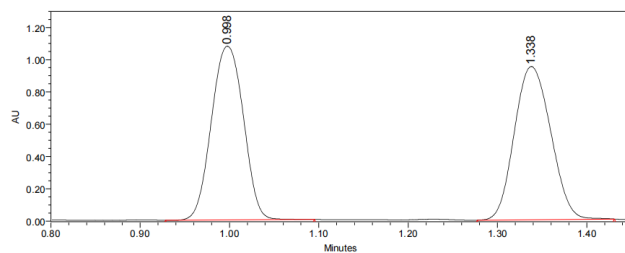

peak information:

|   | RetTime<br>(min) | Area<br>( $\mu\text{V}\cdot\text{s}$ ) | Area<br>(%) | Height<br>( $\mu\text{V}$ ) |
|---|------------------|----------------------------------------|-------------|-----------------------------|
| 1 | 0.996            | 2687679                                | 50.00       | 1076858                     |
| 2 | 1.338            | 2687592                                | 50.00       | 949460                      |

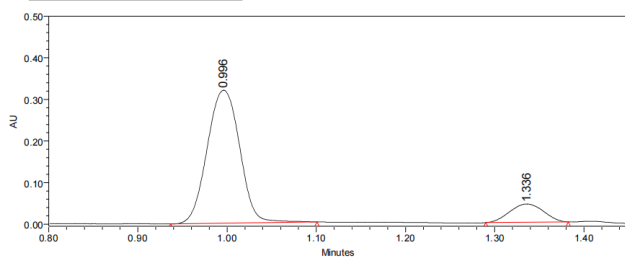

peak information:

|   | RetTime<br>(min) | Area<br>( $\mu\text{V}\cdot\text{s}$ ) | Area<br>(%) | Height<br>( $\mu\text{V}$ ) |
|---|------------------|----------------------------------------|-------------|-----------------------------|
| 1 | 0.996            | 808626                                 | 87.51       | 319476                      |
| 2 | 1.336            | 115360                                 | 12.49       | 43874                       |

## 6. Experimental Details for Transformations of the Products

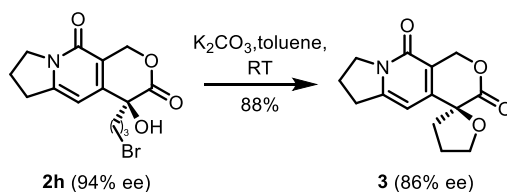

**Synthesis of compound 3:** To a stirred solution of **2h** (0.1 mmol, 1.0 equiv.) in toluene (1 mL) was added  $\text{K}_2\text{CO}_3$  (0.1 mmol, 1.0 equiv.) under an argon atmosphere. The resultant solution was stirred for 24 h at room temperature. Then, the mixture was evaporated and purified by flash chromatography on silica gel (DCM: MeOH = 50:1) to give **3**.

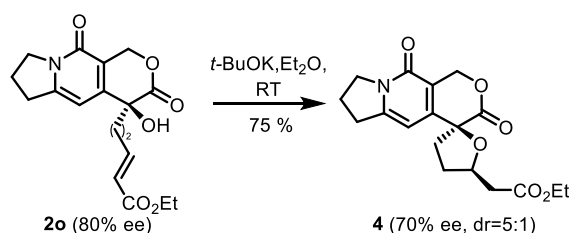

**Synthesis of compound 4:** To a stirred solution of **2o** (0.1 mmol, 1.0 equiv.) in  $\text{Et}_2\text{O}$  (1 mL) was added  $t\text{-BuOK}$  (0.1 mmol, 1.0 equiv.) under an argon atmosphere. The resultant solution was stirred for 1 h at room temperature. Then, the mixture was evaporated and purified by flash chromatography on silica gel (DCM: MeOH = 50:1) to give **4**.

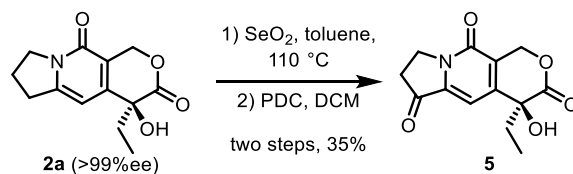

**Synthesis of compound 5:**<sup>4</sup> A mixture of **2a** (1 mmol, 1.0 equiv.) and  $\text{SeO}_2$  (3 mmol, 3.0 equiv.) in dioxane/ $\text{H}_2\text{O}$  (8 mL/0.3 mL) was heated together in a sealed tube at 110 °C for 24 h. The solution was then poured into water and extracted with trichloromethane ( $4 \times 30$  mL). The combined extracts were dried over  $\text{MgSO}_4$ , filtered, and concentrated. The dark solid residue was then chromatographed (DCM/MeOH = 40:1) to afford **7-Hydroxy-de-AB-camptothecin**. To the suspension of **7-Hydroxy-de-AB-camptothecin** (0.7 mmol, 1.0 equiv.) and **5** (415 mg) in DCM (5 mL) at 0 °C was added pyridinium dichromate (1.4 mmol, 2.0 equiv.). After 3.5 h, 30 mL of EtOAc was added to the mixture, and the slurry was filtered through a plug of silica gel and Celite. Evaporation of the filtrate and chromatography ( $\text{CHCl}_3/\text{EtOAc}$  = 1:1) gave **4**.

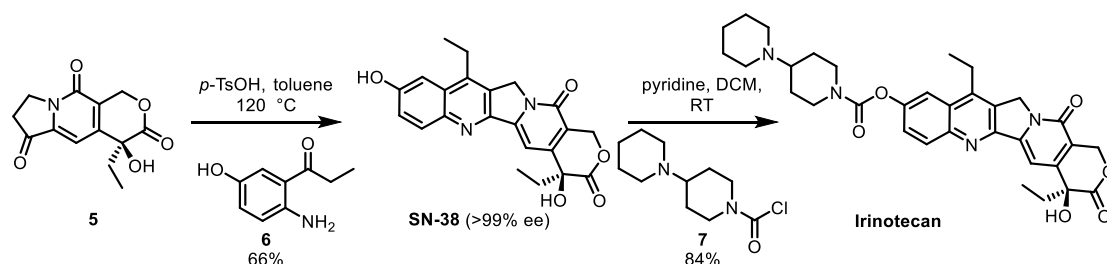

Note: **SN-38** and **Irinotecan** were synthesized following the literature procedure.<sup>12</sup>

**Synthesis of SN-38:** A solution of ketone **4** (0.3 mmol, 1.0 equiv.) and amino ketone **5**<sup>10</sup> (0.39 mmol, 1.3 equiv.) in 5 mL of toluene were heated together for 30 min before the addition of 3 mg of *p*-TsOH. The resulting red solution was heated at 120 °C with Dean-Stark apparatus for 7.25 h. The solvent was removed, and the residue was purified by flash chromatography on silica gel to give **SN-38**. (CHCl<sub>3</sub>/ MeOH = 40:1)

**Synthesis of Irinotecan:** To a solution of **SN-38** (0.1 mmol, 1.0 equiv.) in 0.4 mL pyridine was added carbonyl chloride **6**<sup>11</sup> (0.15 mmol, 1.0 equiv.) in 5 mL DCM. After stirring for 2 h, the solution was quenched with a saturated aqueous solution of NaHCO<sub>3</sub> (1 mL) and extracted by DCM (2×5 mL). The organic phase was dried with Na<sub>2</sub>SO<sub>4</sub> and concentrated in vacuum. The residue was purified by silica gel column chromatography (DCM/MeOH=20:1) to afford **Irinotecan**.

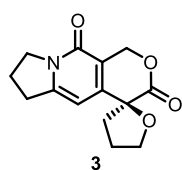

**3** was obtained in 88% yield as a light yellow solid.

TLC: R<sub>f</sub> = 0.4 (DCM: MeOH = 30:1).

m.p.: 152.0-153.8 °C.

[α]<sub>D</sub><sup>25</sup> = +30.0 (c = 0.3, CHCl<sub>3</sub>).

<sup>1</sup>H NMR (600 MHz, Chloroform-*d*): δ 6.40 (s, 1H), 5.56 (d, *J* = 15.6 Hz, 1H), 5.10 (d, *J* = 15.6 Hz, 1H), 4.41 (q, *J* = 7.8 Hz, 1H), 4.26 (q, *J* = 6.6 Hz, 1H), 4.16 (td, *J* = 6.6, 2.8 Hz, 2H), 3.12 (t, *J* = 7.8 Hz, 2H), 2.53-2.47 (m, 1H), 2.23 (quint, *J* = 7.2 Hz, 2H), 2.21-2.16 (m, 1H), 2.11-2.05 (m, 1H), 1.92-1.87 (m, 1H).

<sup>13</sup>C NMR (150 MHz, Chloroform-*d*): δ 171.9, 158.2, 151.3, 150.2, 116.7, 96.7, 80.1, 71.1, 65.3, 48.8, 36.6, 32.0, 25.2, 21.4.

HRMS (ESI): *m/z* calcd for C<sub>14</sub>H<sub>15</sub>NO<sub>4</sub> [M+H]<sup>+</sup>: 262.1074, found 262.1075.

FT-IR (cm<sup>-1</sup>): 1747, 1572, 1439, 1069, 798, 568.

Enantiomeric excess was 86% determined by the chiral UPC<sup>2</sup> analysis (Trefoil<sup>®</sup> CEL 1, CO<sub>2</sub>/MeOH = 80/20, v = 2.0 mL/min, λ = 205.0 nm, t<sub>major</sub> = 2.109 min, t<sub>minor</sub> = 3.887 min)

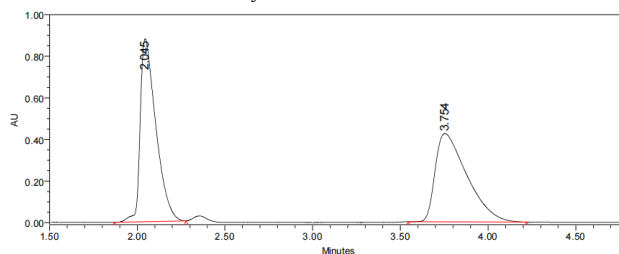

peak information:

|   | RetTime<br>(min) | Area<br>(μV*s) | Area<br>(%) | Height<br>(μV) |
|---|------------------|----------------|-------------|----------------|
| 1 | 2.045            | 5472218        | 50.63       | 878894         |
| 2 | 3.754            | 5335079        | 49.37       | 424365         |

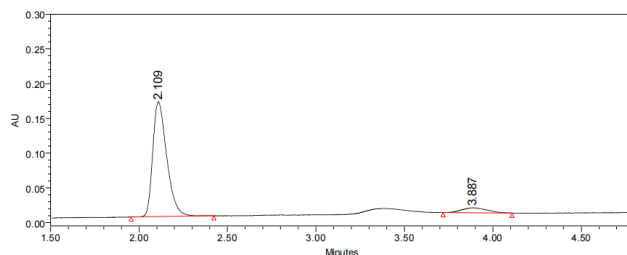

peak information:

|   | RetTime (min) | Area (μV*s) | Area (%) | Height (μV) |
|---|---------------|-------------|----------|-------------|
| 1 | 2.109         | 908462      | 92.80    | 165043      |
| 2 | 3.887         | 70474       | 7.20     | 7026        |

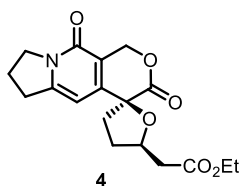

**4** was obtained in 75% yield as a white oil.

**TLC:**  $R_f$  = 0.4 (DCM: MeOH = 30:1).

$[\alpha]_D^{25}$  = +20.0 ( $c$  = 0.3,  $\text{CHCl}_3$ ).

**$^1\text{H}$  NMR** (600 MHz,  $\text{Chloroform-}d$ ):  $\delta$  6.47 (s, 1H), 5.55 (d,  $J$  = 15.6 Hz, 1H), 5.08 (d,  $J$  = 15.6 Hz, 1H), 4.99 (quint,  $J$  = 6.6 Hz, 1H), 4.21-4.14 (m, 5H), 3.13 (t,  $J$  = 7.6 Hz, 2H), 2.82 (dd,  $J$  = 14.8, 6.2 Hz, 1H), 2.67 (dd,  $J$  = 15.0, 6.6 Hz, 1H), 2.51-2.47 (m, 1H), 2.40-2.35 (m, 1H), 2.23 (quint,  $J$  = 7.6 Hz, 3H), 1.97-1.93 (m, 1H), 1.90-1.85 (m, 1H), 1.30 (t,  $J$  = 7.2 Hz, 3H).

**$^{13}\text{C}$  NMR** (150 MHz,  $\text{Chloroform-}d$ ):  $\delta$  171.6, 170.5, 158.2, 151.4, 149.6, 116.7, 96.8, 80.6, 79.1, 78.2, 60.6, 40.6, 40.2, 36.9, 35.8, 32.1, 30.9, 29.9.

**HRMS** (ESI):  $m/z$  calcd for  $\text{C}_{18}\text{H}_{21}\text{NNaO}_6$   $[\text{M}+\text{Na}]^+$ : 370.1261, found 370.1252.

**FT-IR** ( $\text{cm}^{-1}$ ): 1732, 1650, 1466, 1260, 1033, 799, 704.

Enantiomeric excess was 70% determined by the chiral UPC<sup>2</sup> analysis (Trefoil<sup>®</sup> CEL 1,  $\text{CO}_2/\text{MeOH}$  = 90/10,  $v$  = 2.0 mL/min,  $\lambda$  = 205.0 nm,  $t_{\text{major}}$  = 5.717 min,  $t_{\text{minor}}$  = 7.207 min)

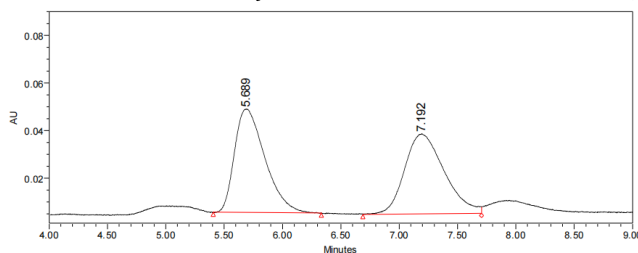

peak information:

|   | RetTime (min) | Area (μV*s) | Area (%) | Height (μV) |
|---|---------------|-------------|----------|-------------|
| 1 | 5.689         | 788545      | 49.80    | 43493       |
| 2 | 7.192         | 794783      | 50.20    | 33656       |

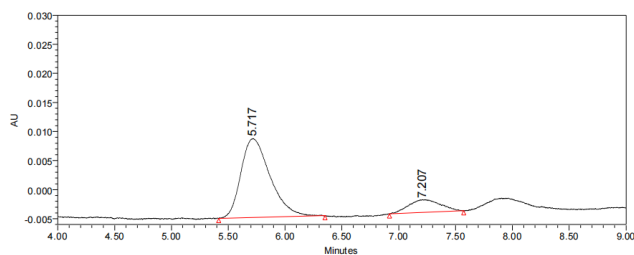

peak information:

|   | RetTime<br>(min) | Area<br>( $\mu\text{V}\cdot\text{s}$ ) | Area<br>(%) | Height<br>( $\mu\text{V}$ ) |
|---|------------------|----------------------------------------|-------------|-----------------------------|
| 1 | 5.717            | 241416                                 | 85.18       | 13564                       |
| 2 | 7.207            | 41992                                  | 14.82       | 2166                        |

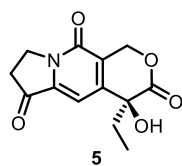

**5** was known compound according to the literature.<sup>4</sup>

$[\alpha]_D^{25} = +112.0$  ( $c = 0.3$ ,  $\text{CHCl}_3$ ).

$^1\text{H NMR}$  (600 MHz,  $\text{Chloroform-}d$ ):  $\delta$  7.22 (s, 1H), 5.68 (d,  $J = 17.4$  Hz, 1H), 5.25 (d,  $J = 17.4$  Hz, 1H), 4.38-4.30 (m, 2H), 3.65 (s, 1H), 2.97 (dd,  $J = 7.8, 6.0$  Hz, 2H), 1.85-1.78 (m, 2H), 0.98 (t,  $J = 7.4$  Hz, 3H).

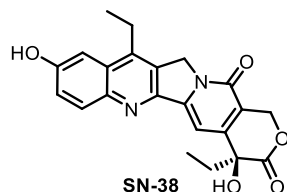

**SN-38** was obtained in 66% yield as a light yellow solid.

**TLC**:  $R_f = 0.4$  (DCM: MeOH = 20:1).

**m.p.**: 228.1-229.2 °C.

$[\alpha]_D^{25} = +26.0$  ( $c = 0.3$ ,  $\text{CHCl}_3/\text{MeOH} = 4:1$ ).

$^1\text{H NMR}$  (600 MHz,  $\text{DMSO-}d_6$ ):  $\delta$  10.29 (s, 1H), 8.03 (dt,  $J = 8.6, 4.2$  Hz, 1H), 7.43-7.38 (m, 2H), 7.25 (s, 1H), 6.49 (s, 1H), 5.42 (s, 2H), 5.30-5.25 (m, 2H), 3.14-3.03 (m, 1H), 1.91-1.82 (m, 2H), 1.30 (t,  $J = 7.6$  Hz, 3H), 0.88 (t,  $J = 7.2$  Hz, 3H).

$^{13}\text{C NMR}$  (150 MHz,  $\text{DMSO-}d_6$ ):  $\delta$  172.6, 156.8, 156.7, 150.0, 148.8, 146.4, 143.6, 142.7, 131.5, 128.2, 128.0, 122.4, 118.0, 104.8, 95.8, 72.4, 65.2, 49.4, 40.0, 30.2, 22.2, 13.3, 7.7.

**HRMS** (ESI):  $m/z$  calcd for  $\text{C}_{22}\text{H}_{21}\text{N}_2\text{O}_5$   $[\text{M}+\text{H}]^+$ : 393.1445, found 393.1446.

**FT-IR** ( $\text{cm}^{-1}$ ): 3576, 1732, 1650, 1566, 1466, 1246, 1189, 1033, 852, 833, 719.

Enantiomeric excess was >99% determined by the chiral UPC<sup>2</sup> analysis (Trefoil<sup>®</sup> Amy-1  $\text{CO}_2/\text{MeOH} = 80/20$ ,  $v = 2.0$  mL/min,  $\lambda = 220.0$  nm,  $t_{\text{minor}} = 3.935$  min,  $t_{\text{major}} = 5.360$  min)

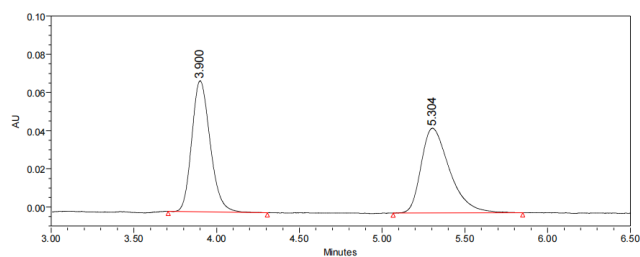

peak information:

|   | RetTime<br>(min) | Area<br>( $\mu V \cdot s$ ) | Area<br>(%) | Height<br>( $\mu V$ ) |
|---|------------------|-----------------------------|-------------|-----------------------|
| 1 | 3.900            | 530133                      | 49.90       | 68581                 |
| 2 | 5.304            | 532186                      | 50.10       | 44434                 |

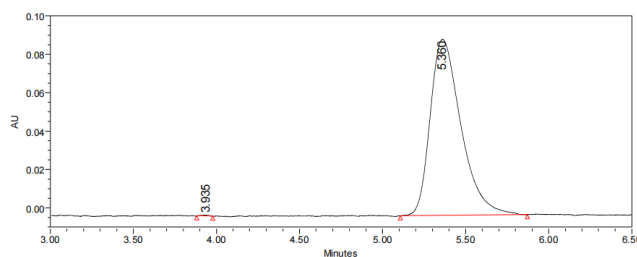

peak information:

|   | RetTime<br>(min) | Area<br>( $\mu V \cdot s$ ) | Area<br>(%) | Height<br>( $\mu V$ ) |
|---|------------------|-----------------------------|-------------|-----------------------|
| 1 | 3.935            | 1236                        | 0.10        | 482                   |
| 2 | 5.360            | 1181809                     | 99.90       | 91727                 |

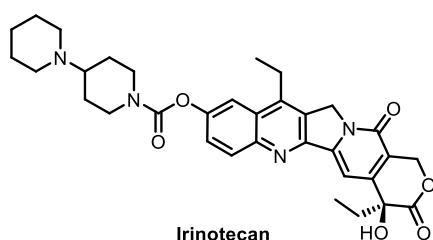

**Irinotecan** was obtained in 84% yield as a light yellow solid.

**TLC:**  $R_f$  = 0.2 (DCM: MeOH = 10:1).

**m.p.:** 215.0-217.0 °C.

$[\alpha]_D^{25} = +25.0$  ( $c = 0.6$ ,  $\text{CHCl}_3$ ).

**$^1\text{H}$  NMR** (600 MHz,  $\text{Chloroform-}d$ ):  $\delta$  8.18 (d,  $J = 9.0$  Hz, 1H), 7.82 (d,  $J = 2.4$  Hz, 1H), 7.62 (s, 1H), 7.54 (dd,  $J = 9.0, 2.6$  Hz, 1H), 5.73 (d,  $J = 16.2$  Hz, 1H), 5.29 (d,  $J = 16.2$  Hz, 1H), 5.24 (s, 2H), 4.53 (dd,  $J = 46.2, 14.4$  Hz, 2H), 4.07 (brs, 1H), 3.29 (t,  $J = 11.4$  Hz, 1H), 3.20-3.09 (m, 6H), 3.05 (q,  $J = 7.2$  Hz, 1H), 2.96 (t,  $J = 13.2$  Hz, 1H), 2.47 (d,  $J = 11.8$  Hz, 1H), 2.29 (d,  $J = 12.0$  Hz, 1H), 2.10 (s, 4H), 2.00-1.80 (m, 5H), 1.48 (t,  $J = 7.2$  Hz, 1H), 1.40 (d,  $J = 7.0$  Hz, 3H), 1.03 (t,  $J = 7.4$  Hz, 3H).

**$^{13}\text{C}$  NMR** (150 MHz,  $\text{Chloroform-}d$ ):  $\delta$  173.8, 157.6, 152.9, 151.7, 150.2, 150.0, 147.2, 146.8, 145.2, 131.8, 127.4, 127.2, 125.5, 118.5, 114.5, 97.9, 72.7, 66.3, 63.4, 50.1, 49.4, 45.8, 43.4, 42.2, 31.6, 26.7, 25.8, 23.1, 140, 11.2, 8.6, 7.8.

**HRMS** (ESI):  $m/z$  calcd for  $\text{C}_{33}\text{H}_{39}\text{N}_4\text{O}_6$   $[\text{M}+\text{H}]^+$ : 587.2864, found 587.2854.

**FT-IR** ( $\text{cm}^{-1}$ ): 3443, 2925, 2852, 2363, 1648, 1447, 1408, 1309, 1077, 1024, 905, 752.

## 7. X-ray Crystal Structures of Compounds 2a

### X-Ray data for (+)-2a (CCDC: 2362885)

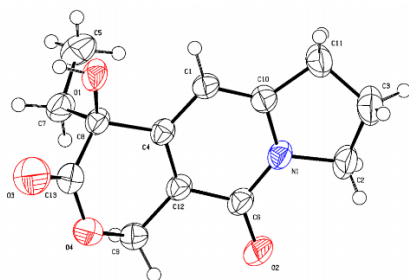

**Table S7.** Crystal Data and Structure Refinement for (+)-2a

|                                             |                                                             |
|---------------------------------------------|-------------------------------------------------------------|
| Empirical formula                           | C <sub>13</sub> H <sub>15</sub> NO <sub>4</sub>             |
| Formula weight                              | 249.26                                                      |
| Temperature/K                               | 302.44(10)                                                  |
| Crystal system                              | monoclinic                                                  |
| Space group                                 | P2 <sub>1</sub>                                             |
| a/Å                                         | 7.5054(2)                                                   |
| b/Å                                         | 10.0086(2)                                                  |
| c/Å                                         | 8.5104(2)                                                   |
| $\alpha$ /°                                 | 90                                                          |
| $\beta$ /°                                  | 110.518(2)                                                  |
| $\gamma$ /°                                 | 90                                                          |
| Volume/Å <sup>3</sup>                       | 598.73(3)                                                   |
| Z                                           | 2                                                           |
| $\rho$ calcg/cm <sup>3</sup>                | 1.383                                                       |
| $\mu$ /mm <sup>-1</sup>                     | 0.858                                                       |
| F(000)                                      | 264.0                                                       |
| Crystal size/mm <sup>3</sup>                | 0.18 × 0.15 × 0.12                                          |
| Radiation                                   | Cu K $\alpha$ ( $\lambda$ = 1.54184)                        |
| 2 $\theta$ range for data collection/°      | 11.1 to 151.992                                             |
| Index ranges                                | -8 ≤ h ≤ 9, -10 ≤ k ≤ 12, -10 ≤ l ≤ 10                      |
| Reflections collected                       | 7782                                                        |
| Independent reflections                     | 2258 [R <sub>S</sub> = 0.0256, R <sub>sigma</sub> = 0.0183] |
| Data/restraSs/parameters                    | 2258/1/165                                                  |
| Goodness-of-fit on F <sup>2</sup>           | 1.067                                                       |
| Final R indexes [I ≥ 2 $\sigma$ (I)]        | R <sub>1</sub> = 0.0316, wR <sub>2</sub> = 0.0822           |
| Final R indexes [all data]                  | R <sub>1</sub> = 0.0323, wR <sub>2</sub> = 0.0832           |
| Largest diff. peak/hole / e Å <sup>-3</sup> | 0.19/-0.14                                                  |
| Flack parameter                             | 0.06(6)                                                     |

## 8. References

- (1) B. Brož, Z. Růžicková and P. Šimůnek, *ARKIVOC*, 2016, **5**, 118-141.
- (2) J. Aleksić, M. Stojanović and M. Baranac-Stojanović, *Chem. Asian J.*, 2018, **13**, 1811-1830.
- (3) T. A. Bryson and T. M. Dolak, *Org. Synth.*, 1977, **57**, 62-64.
- (4) W. Shen, C. A. Coburn, W. G. Bornmann and S. J. Danishefsky, *J. Org. Chem.*, 1993, **58**, 611-617.
- (5) X.-L. Wang, L.-J. Xu, F.-J. Xiong, Y. Wu and F.-E. Chen, *Tetrahedron: Asymmetry*, 2017, **28**, 843-848.
- (6) S.-K. Chen, W.-Q. Ma, Z.-B. Yan, F.-M. Zhang, S.-H. Wang, Y.-Q. Tu, X.-M. Zhang and J.-M. Tian, *J. Am. Chem. Soc.*, 2018, **140**, 10099-10103.
- (7) W.-J. Tang, A. Capacci, X.-D. Wei, W.-J. Li, A. White, N. Patel, J. Savoie, J. Gao, S. Rodriguez, B. Qu, N. Haddad, B. Lu, D. Krishnamurthy, N. Yee and C. Senanayake, *Angew. Chem. Int. Ed.*, 2010, **49**, 5879-5883.
- (8) K. Barral, A. D. Moorhouse and J. E. Moses, *Org. Lett.*, 2007, **9**, 1809-1811.
- (9) (a) L.-Z. Yang, Y.-P. Zhang, X.-D. Zou, H.-J. Lu and G.-G. Li, *Green Chem.*, 2018, **20**, 1362-1366; (b) B. J. Stokes, B. Jovanović, H.-J. Dong, K. J. Richert, R. D. Riell, and T.G. Driver, *J. Org. Chem.*, 2009, **74**, 3225-3228.
- (10) X.-D. Xiong, W.-X. Chen, Y.-Y. Kuang and F.-E. Chen, *Org. Prep. Proced. S.*, 2009, **41**, 423-427.
- (11) X.-L. Hu, Q.-W. He, H. Long, L.-X. Zhang, R. Wang, B.-L. Wang, J.-H. Feng, Q. Wang, J.-Q. Hou, X.-Q. Zhang, W.-C. Ye and H. Wang, *J. Nat. Prod.*, 2021, **84**, 1954-1966.
- (12)(a) K. E. Henegar, S.W. Ashford, T. A. Baughman, J. C. Sih and R.-L. Gu, *J. Org. Chem.*, 1997, **62**, 19, 6588-6597; (b) Y. Yuan, W.-H. Dong, X.-S. Gao, X.-M. Xie, D. P. Curran and Z.-G. Zhang, *Chin. J. Chem.*, 2018, **36**, 1035-1040.

## 9. Copies of NMR Spectra

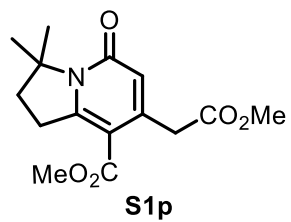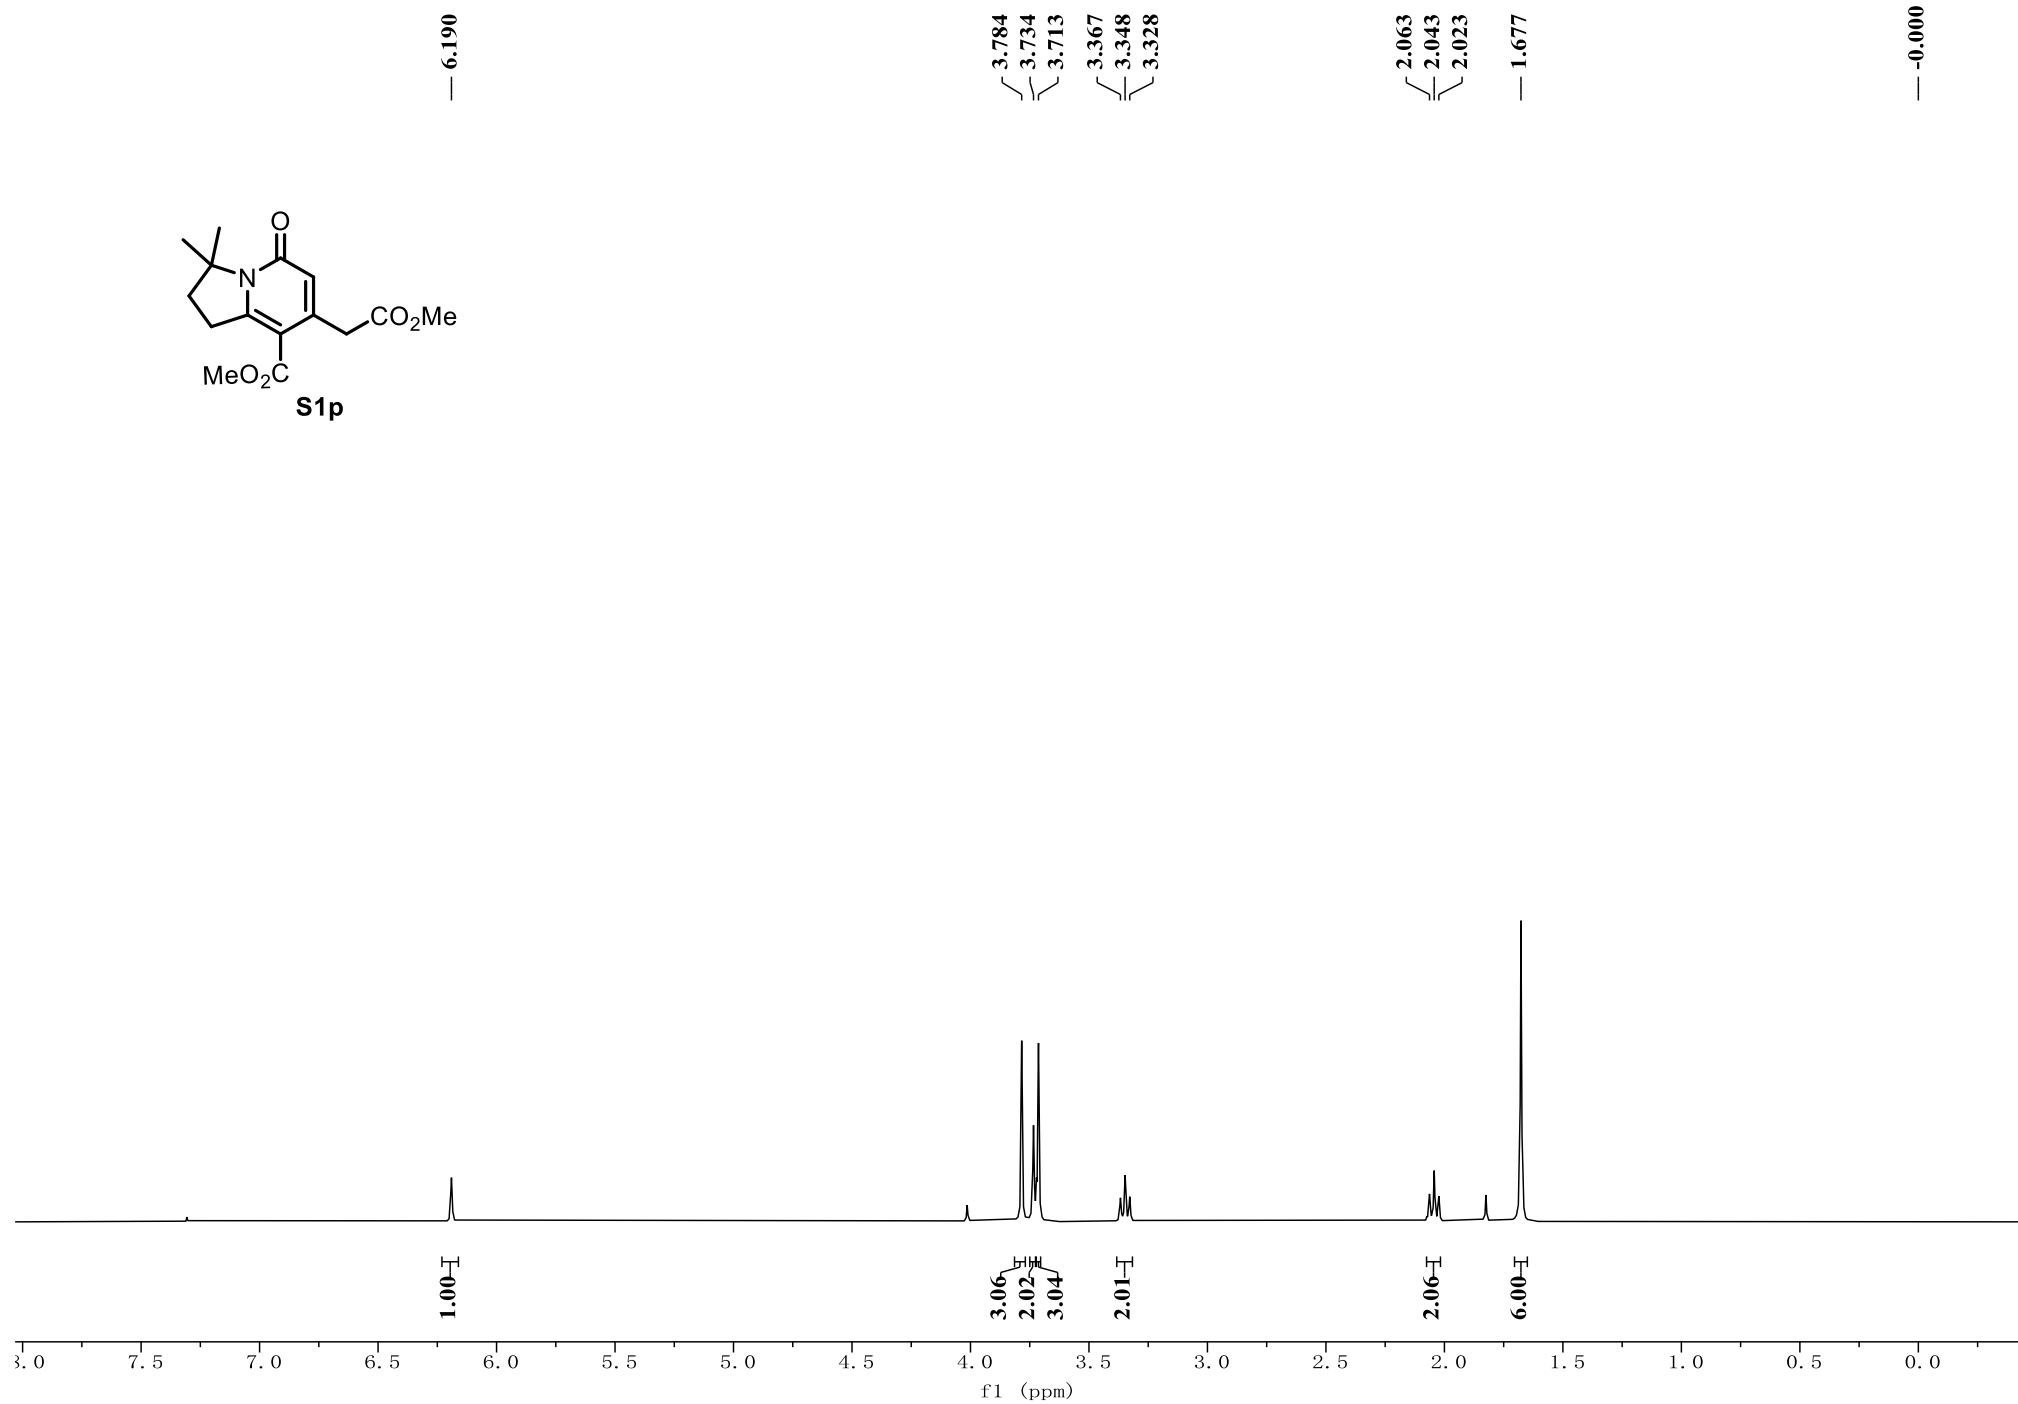

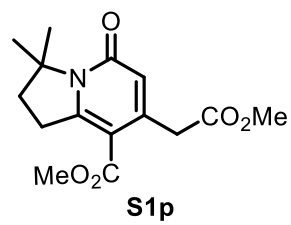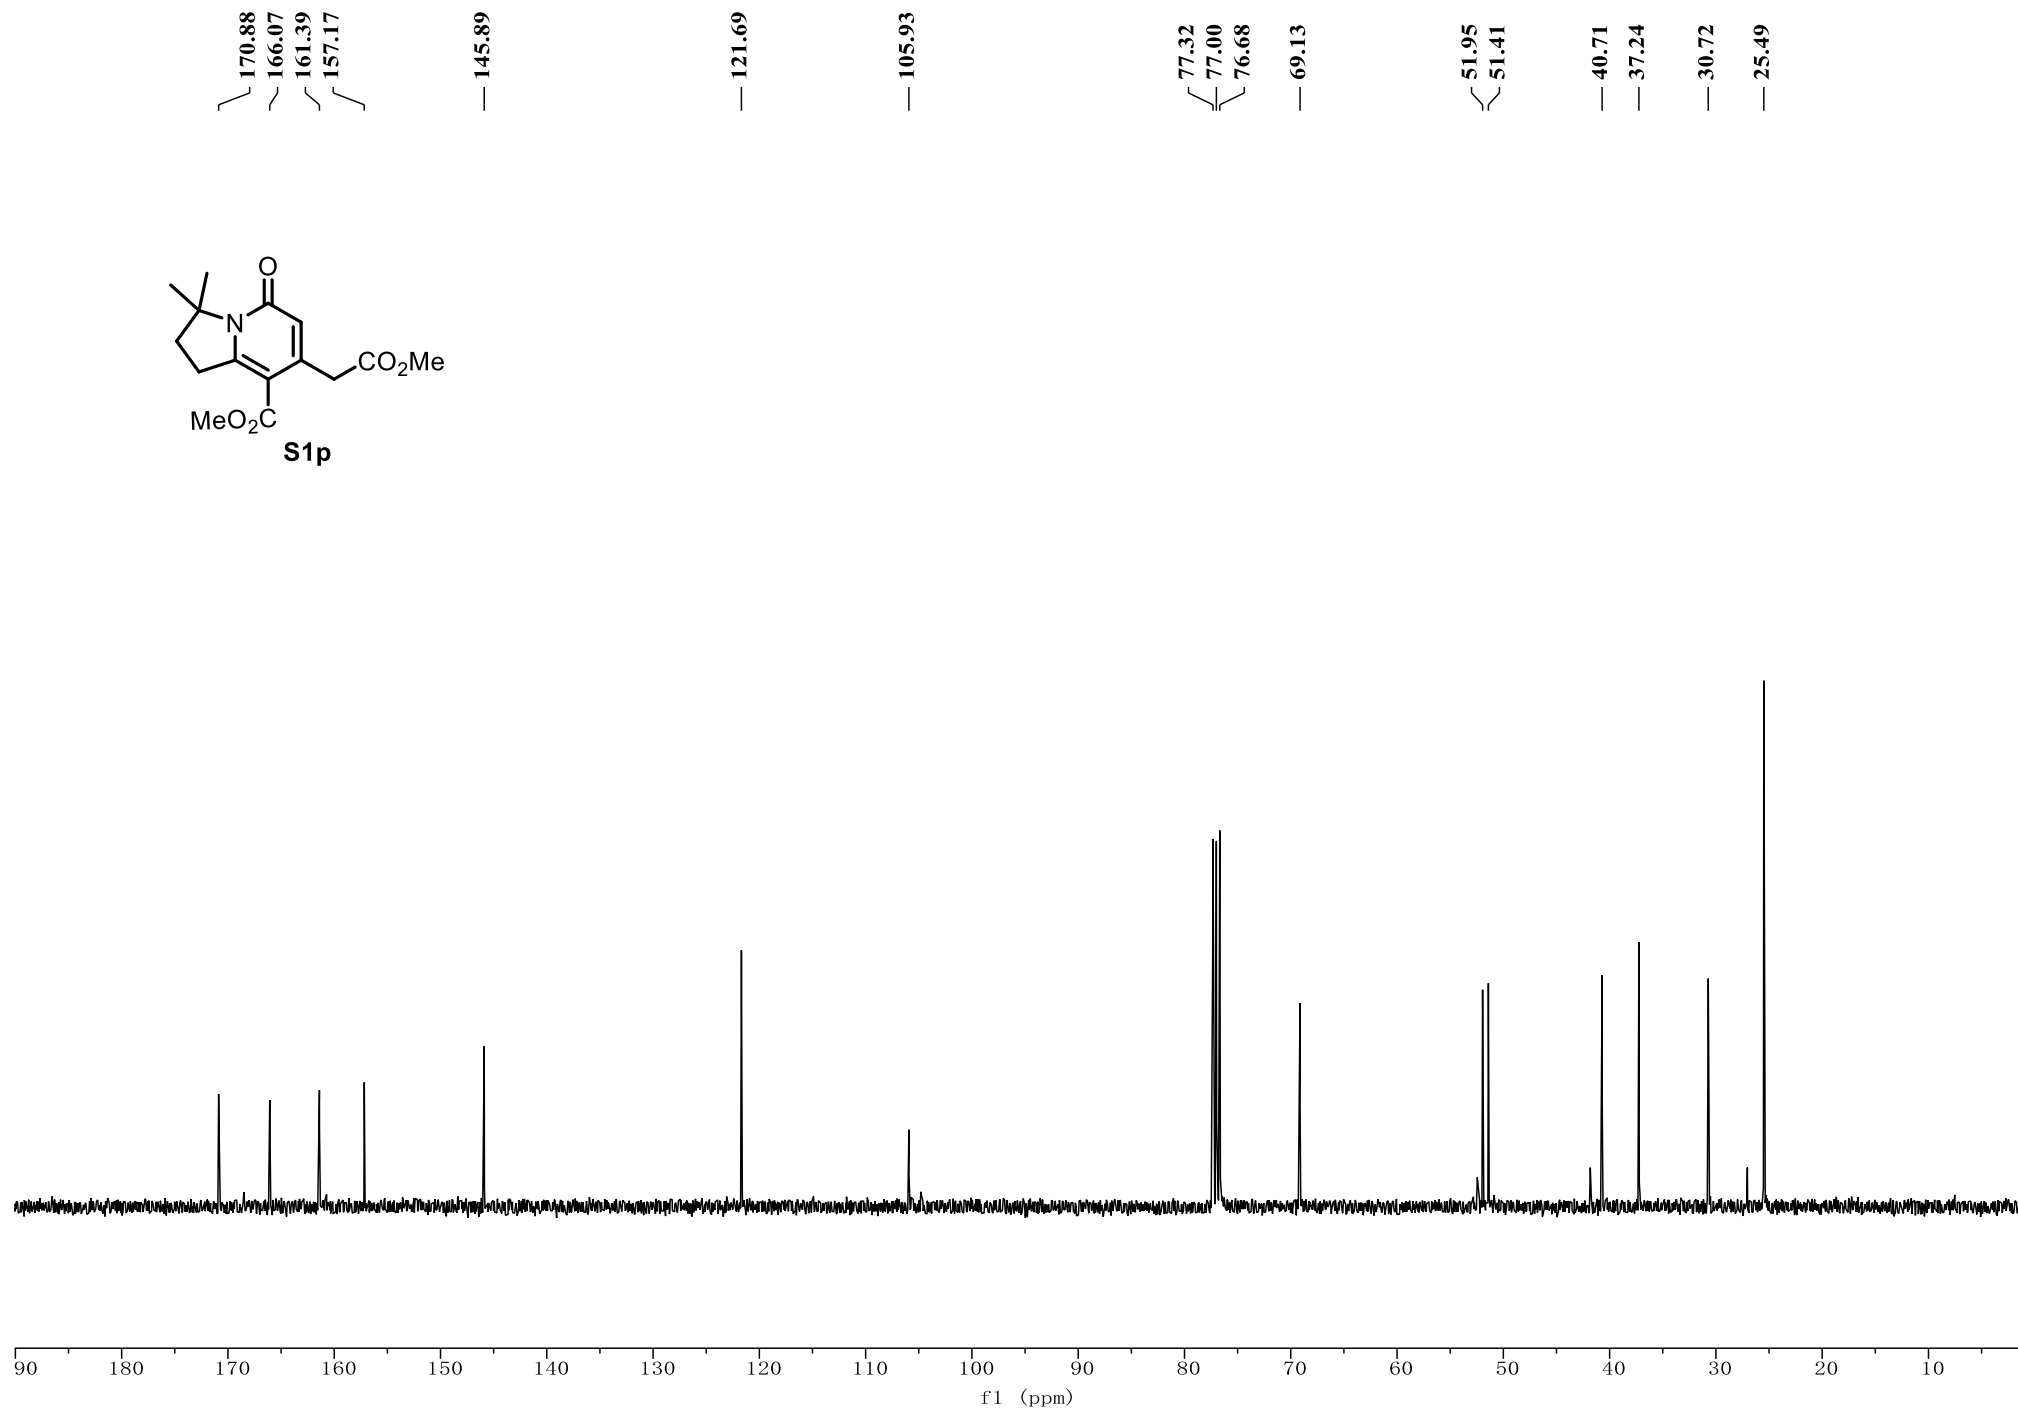

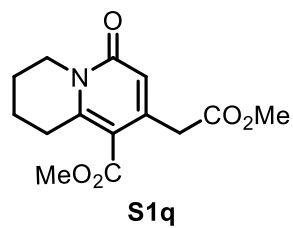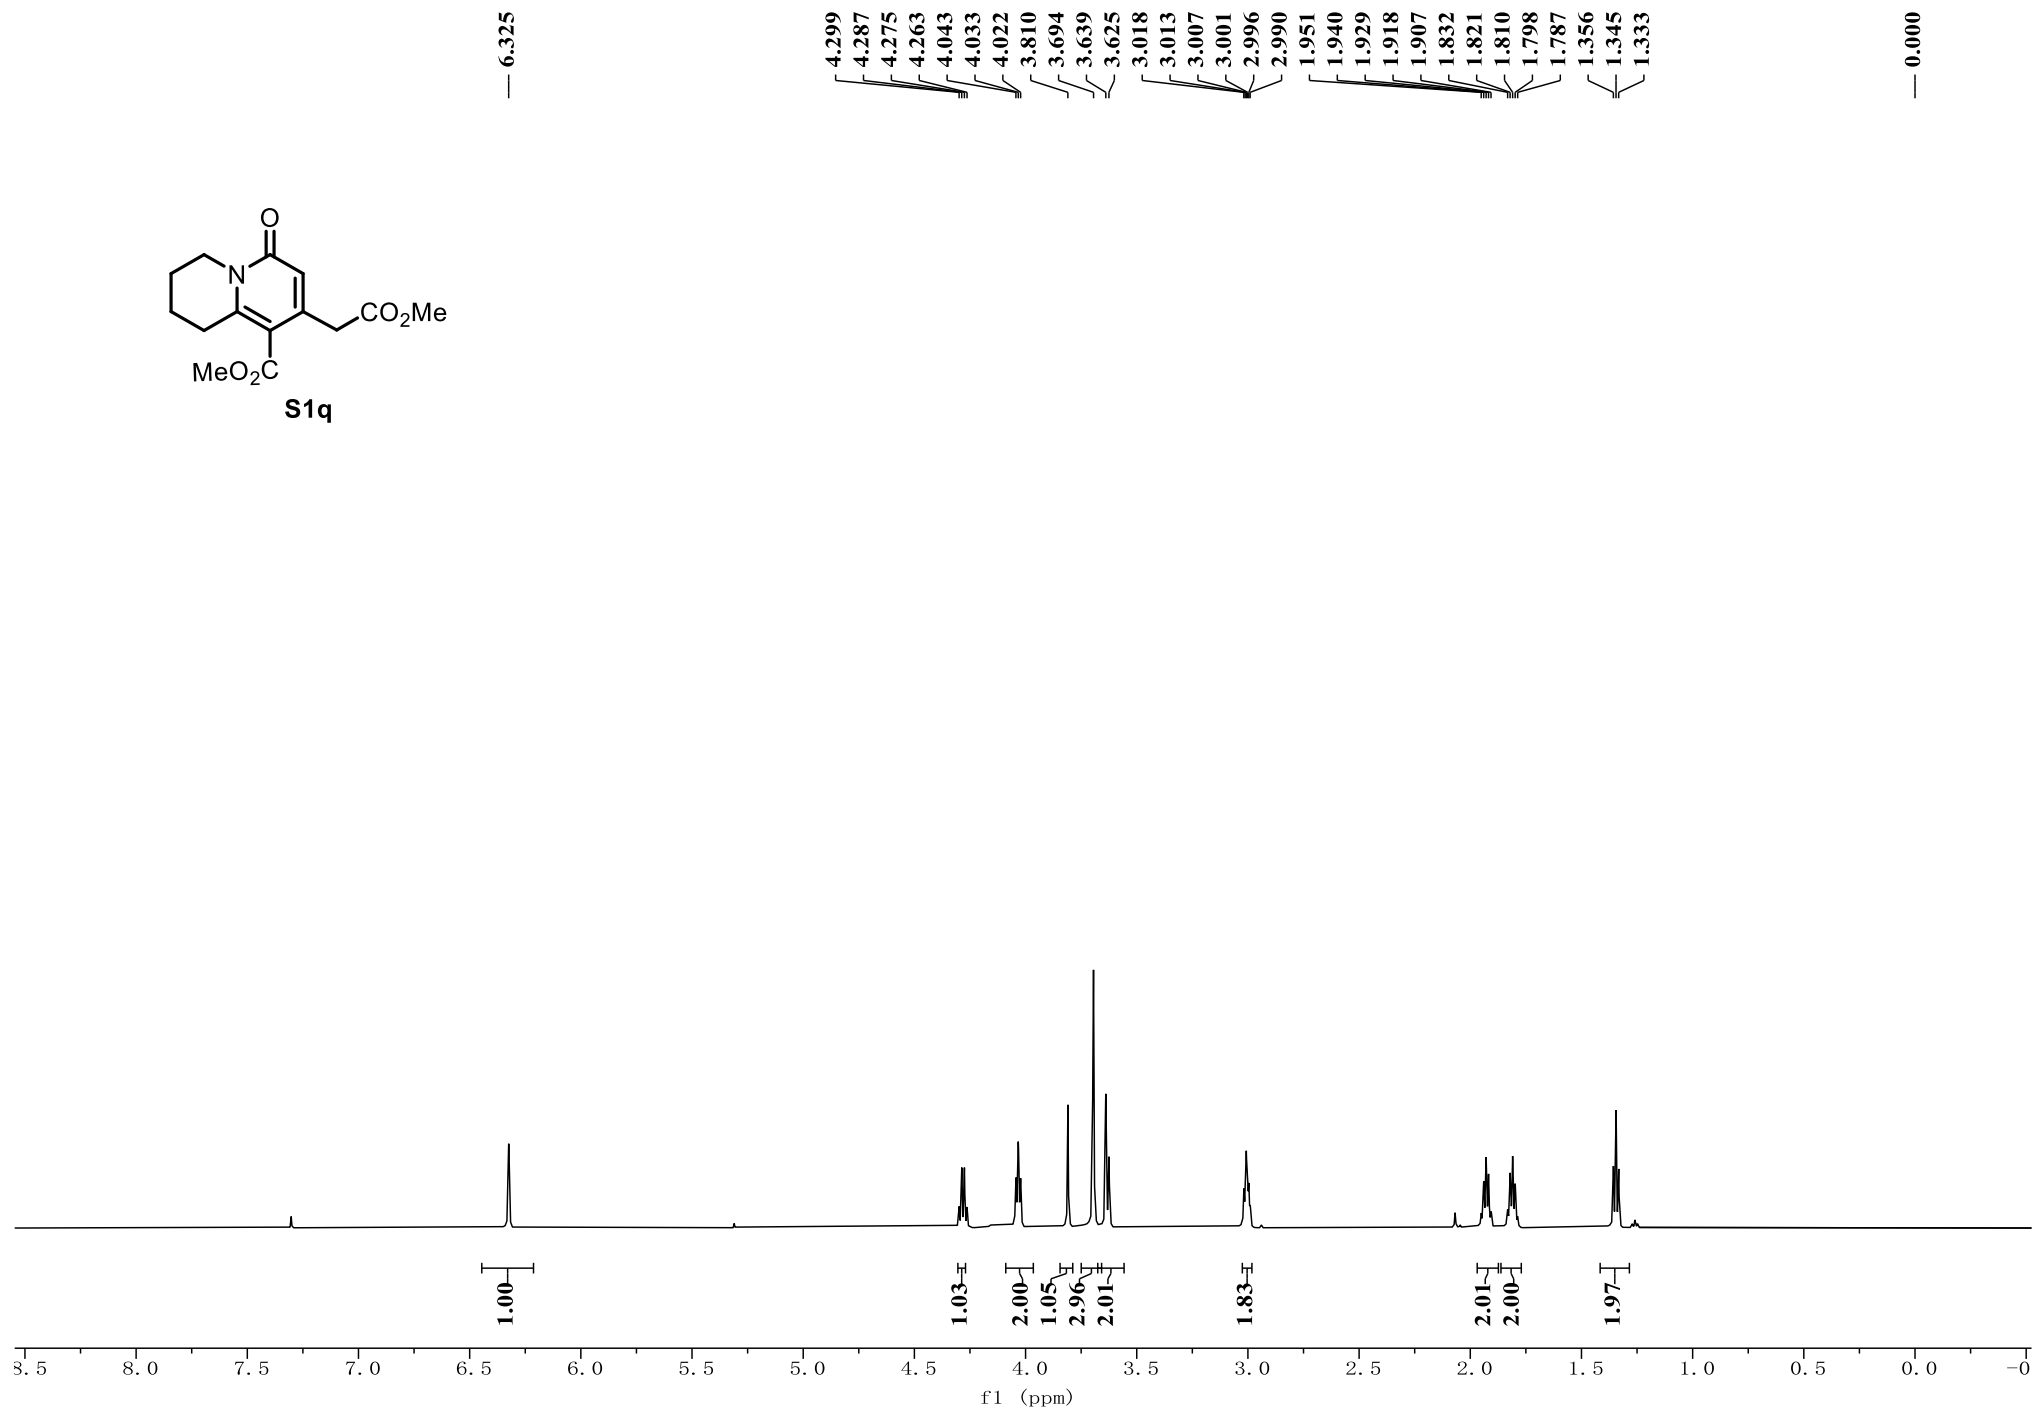

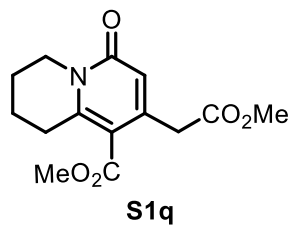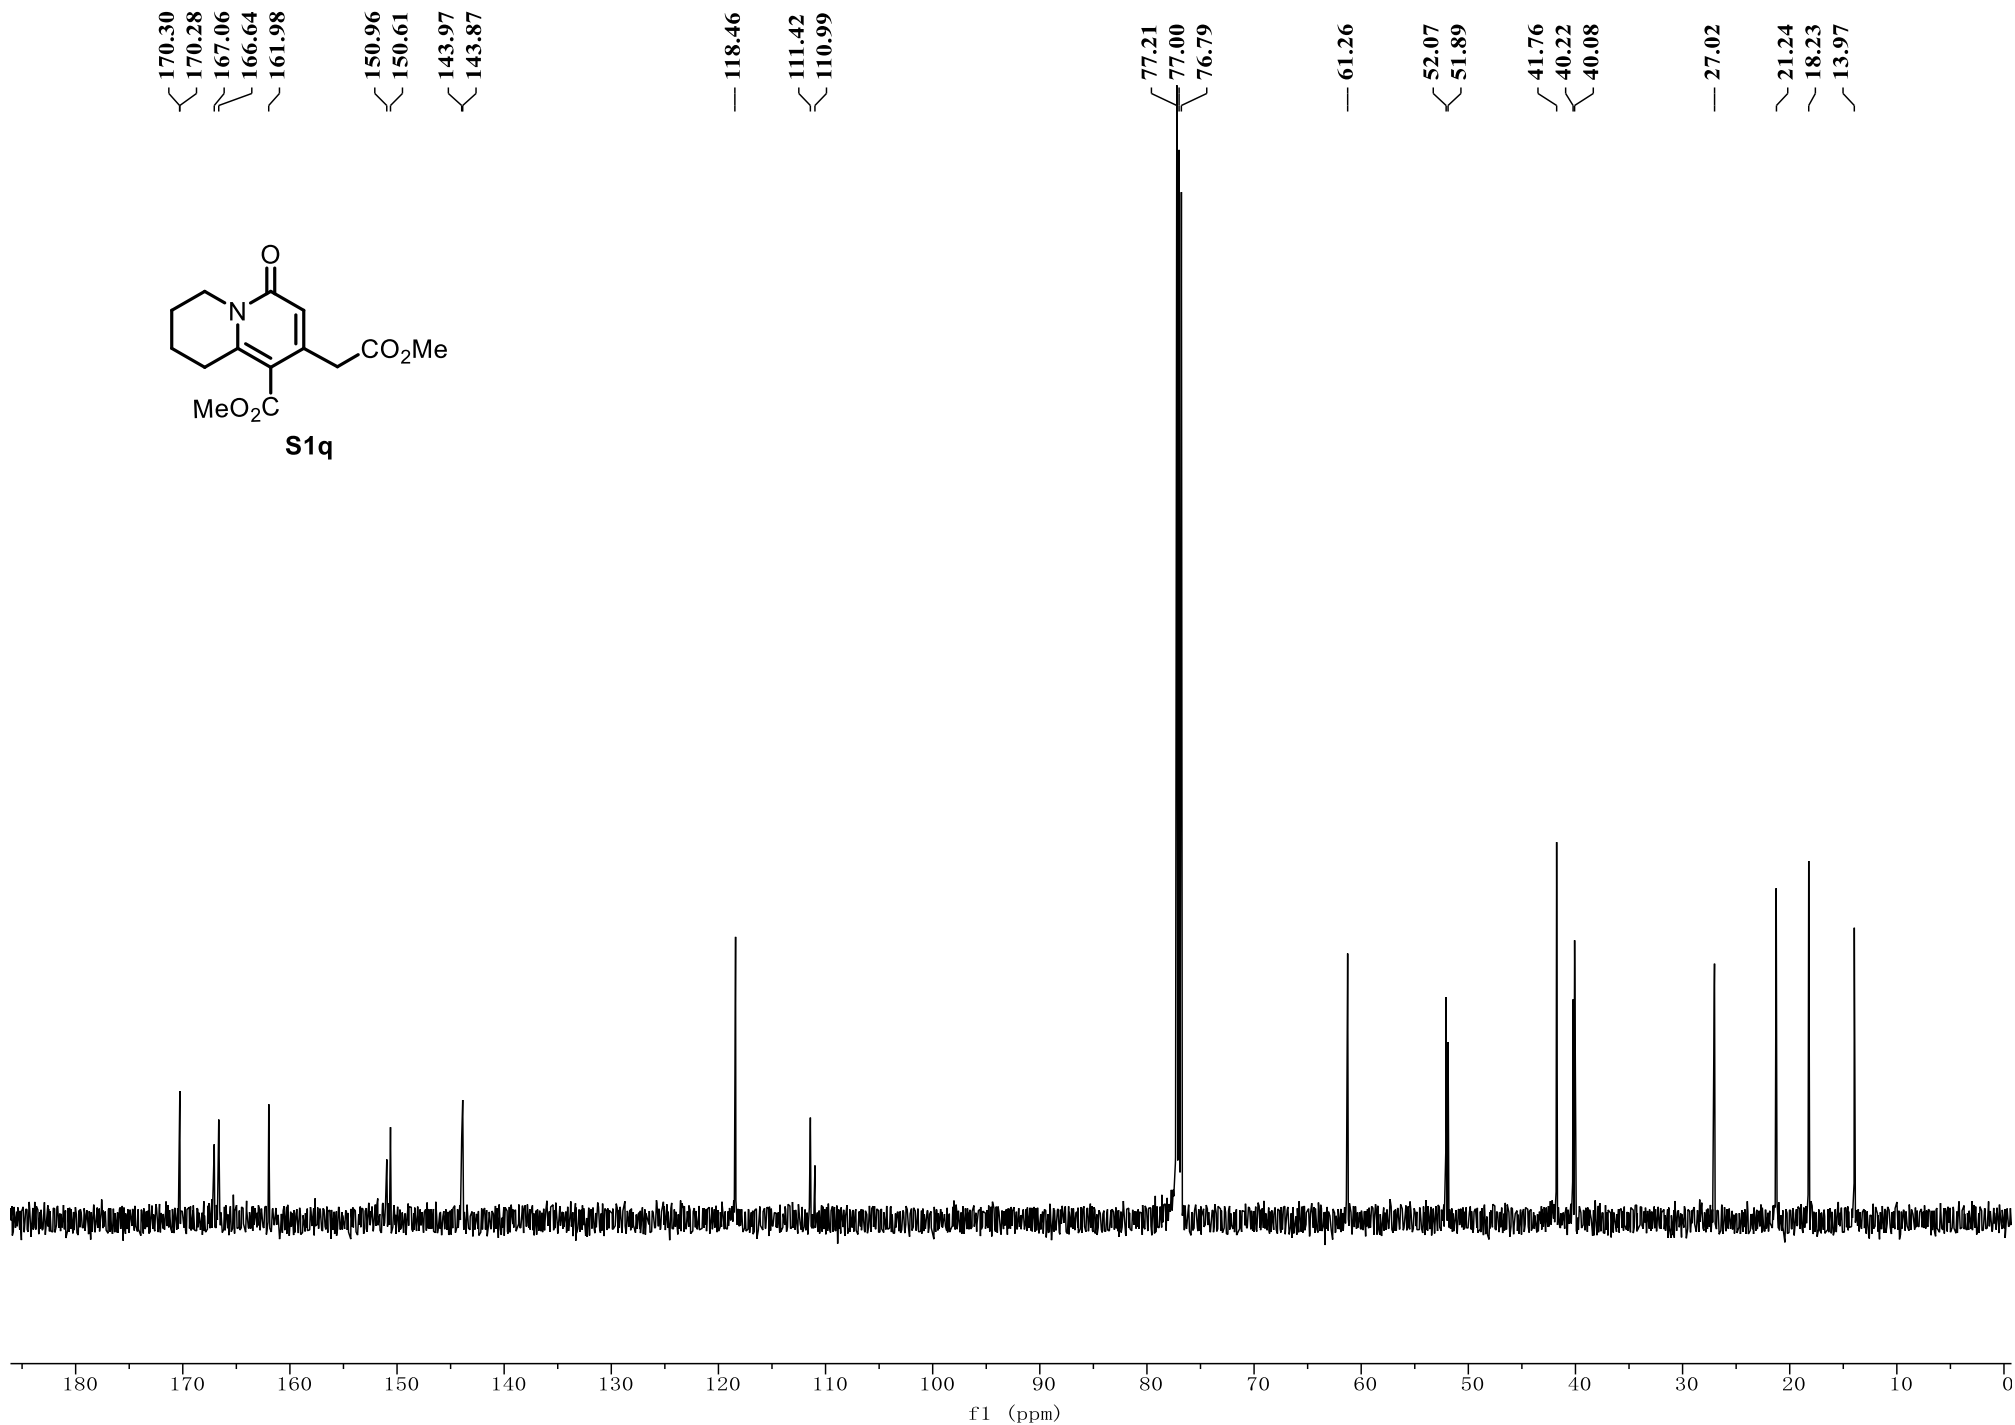

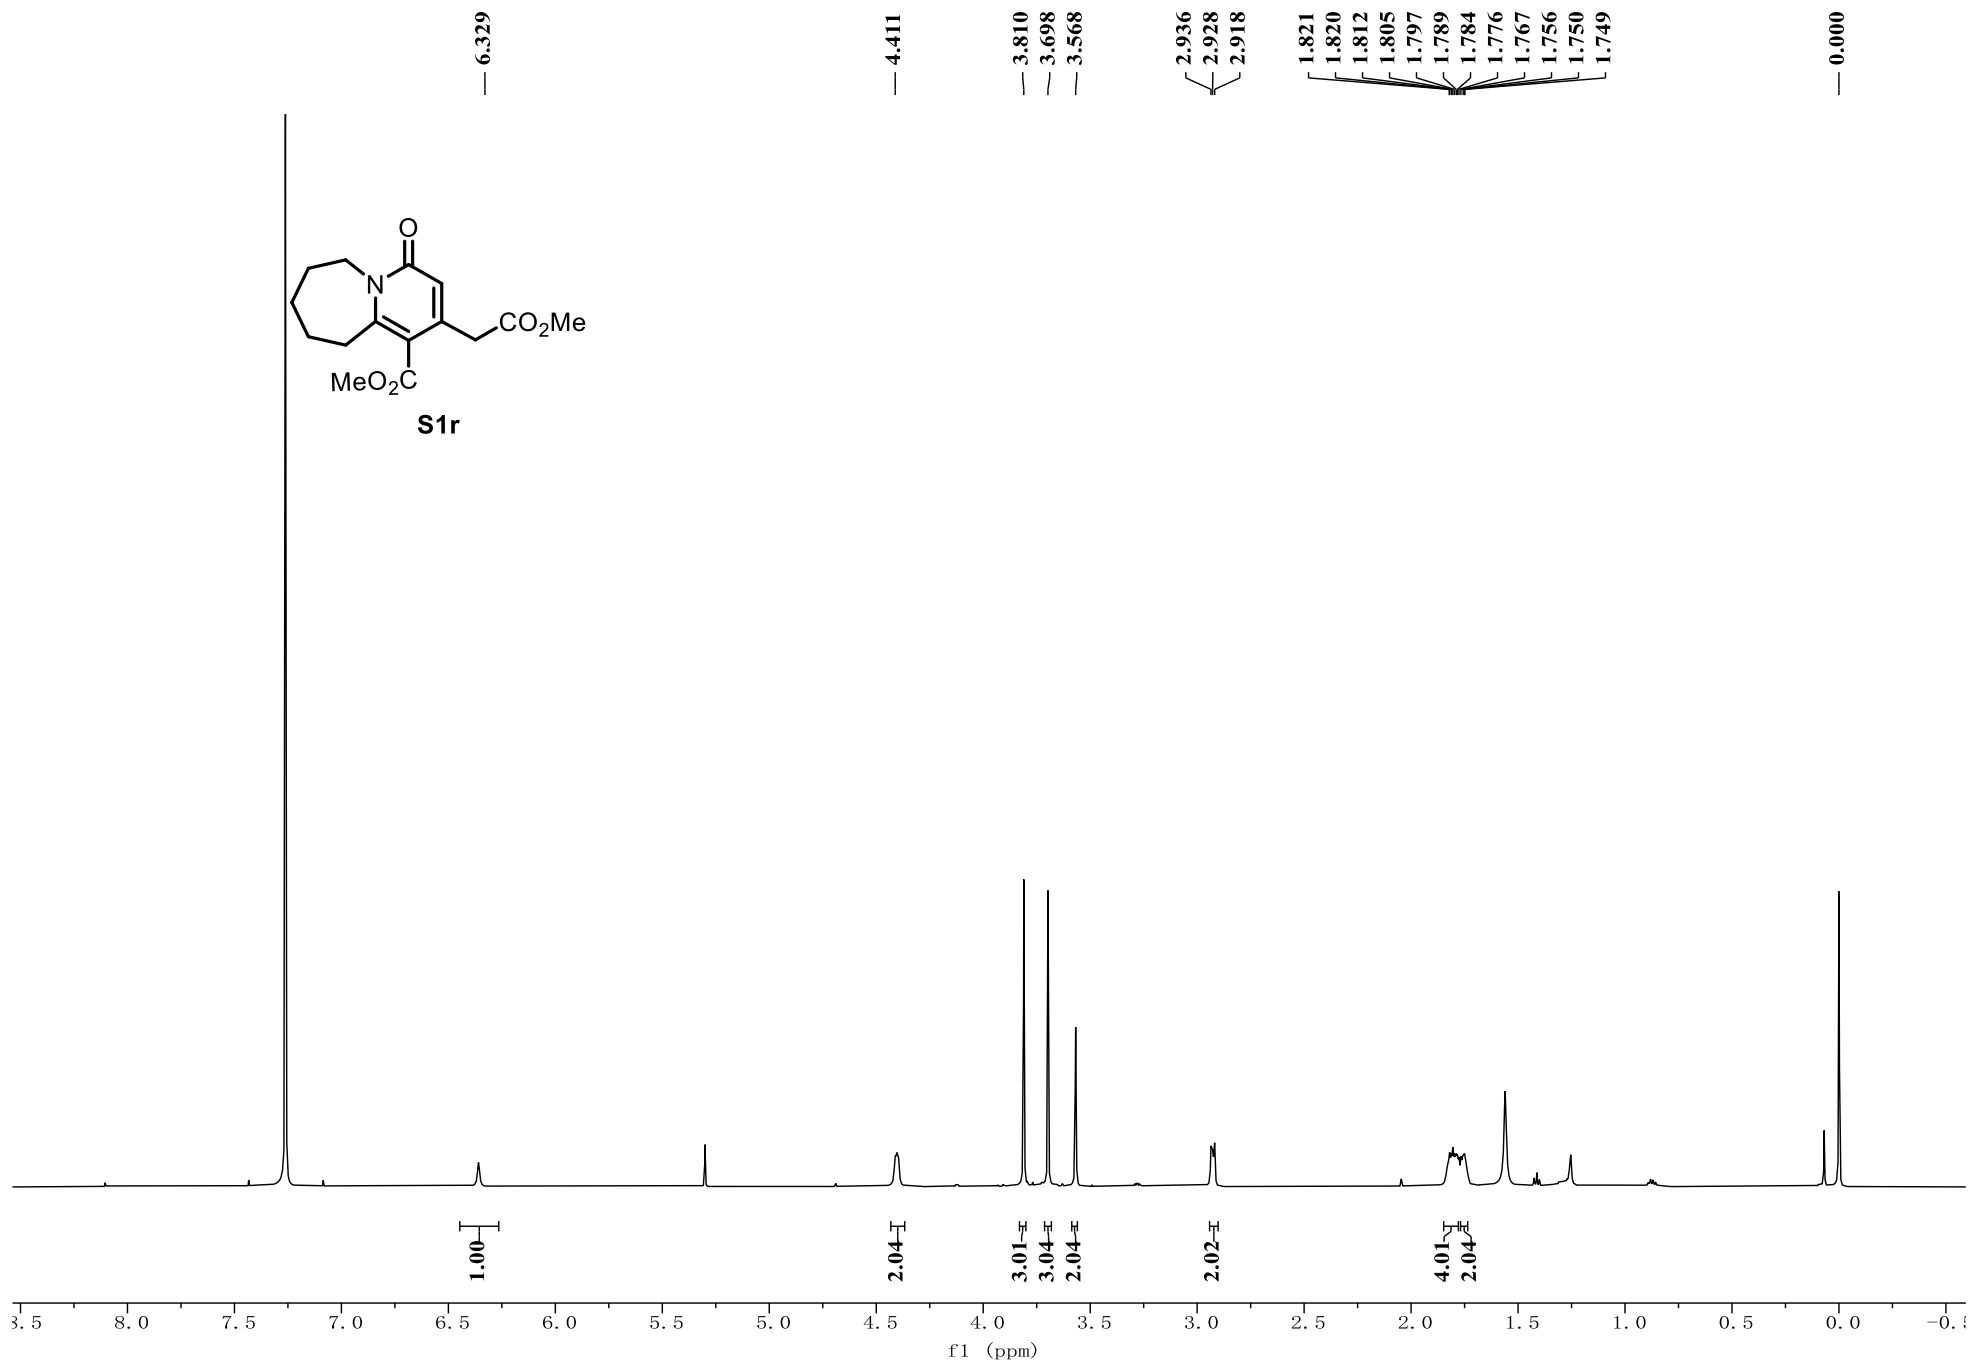

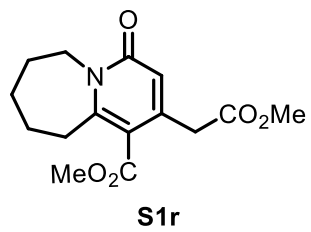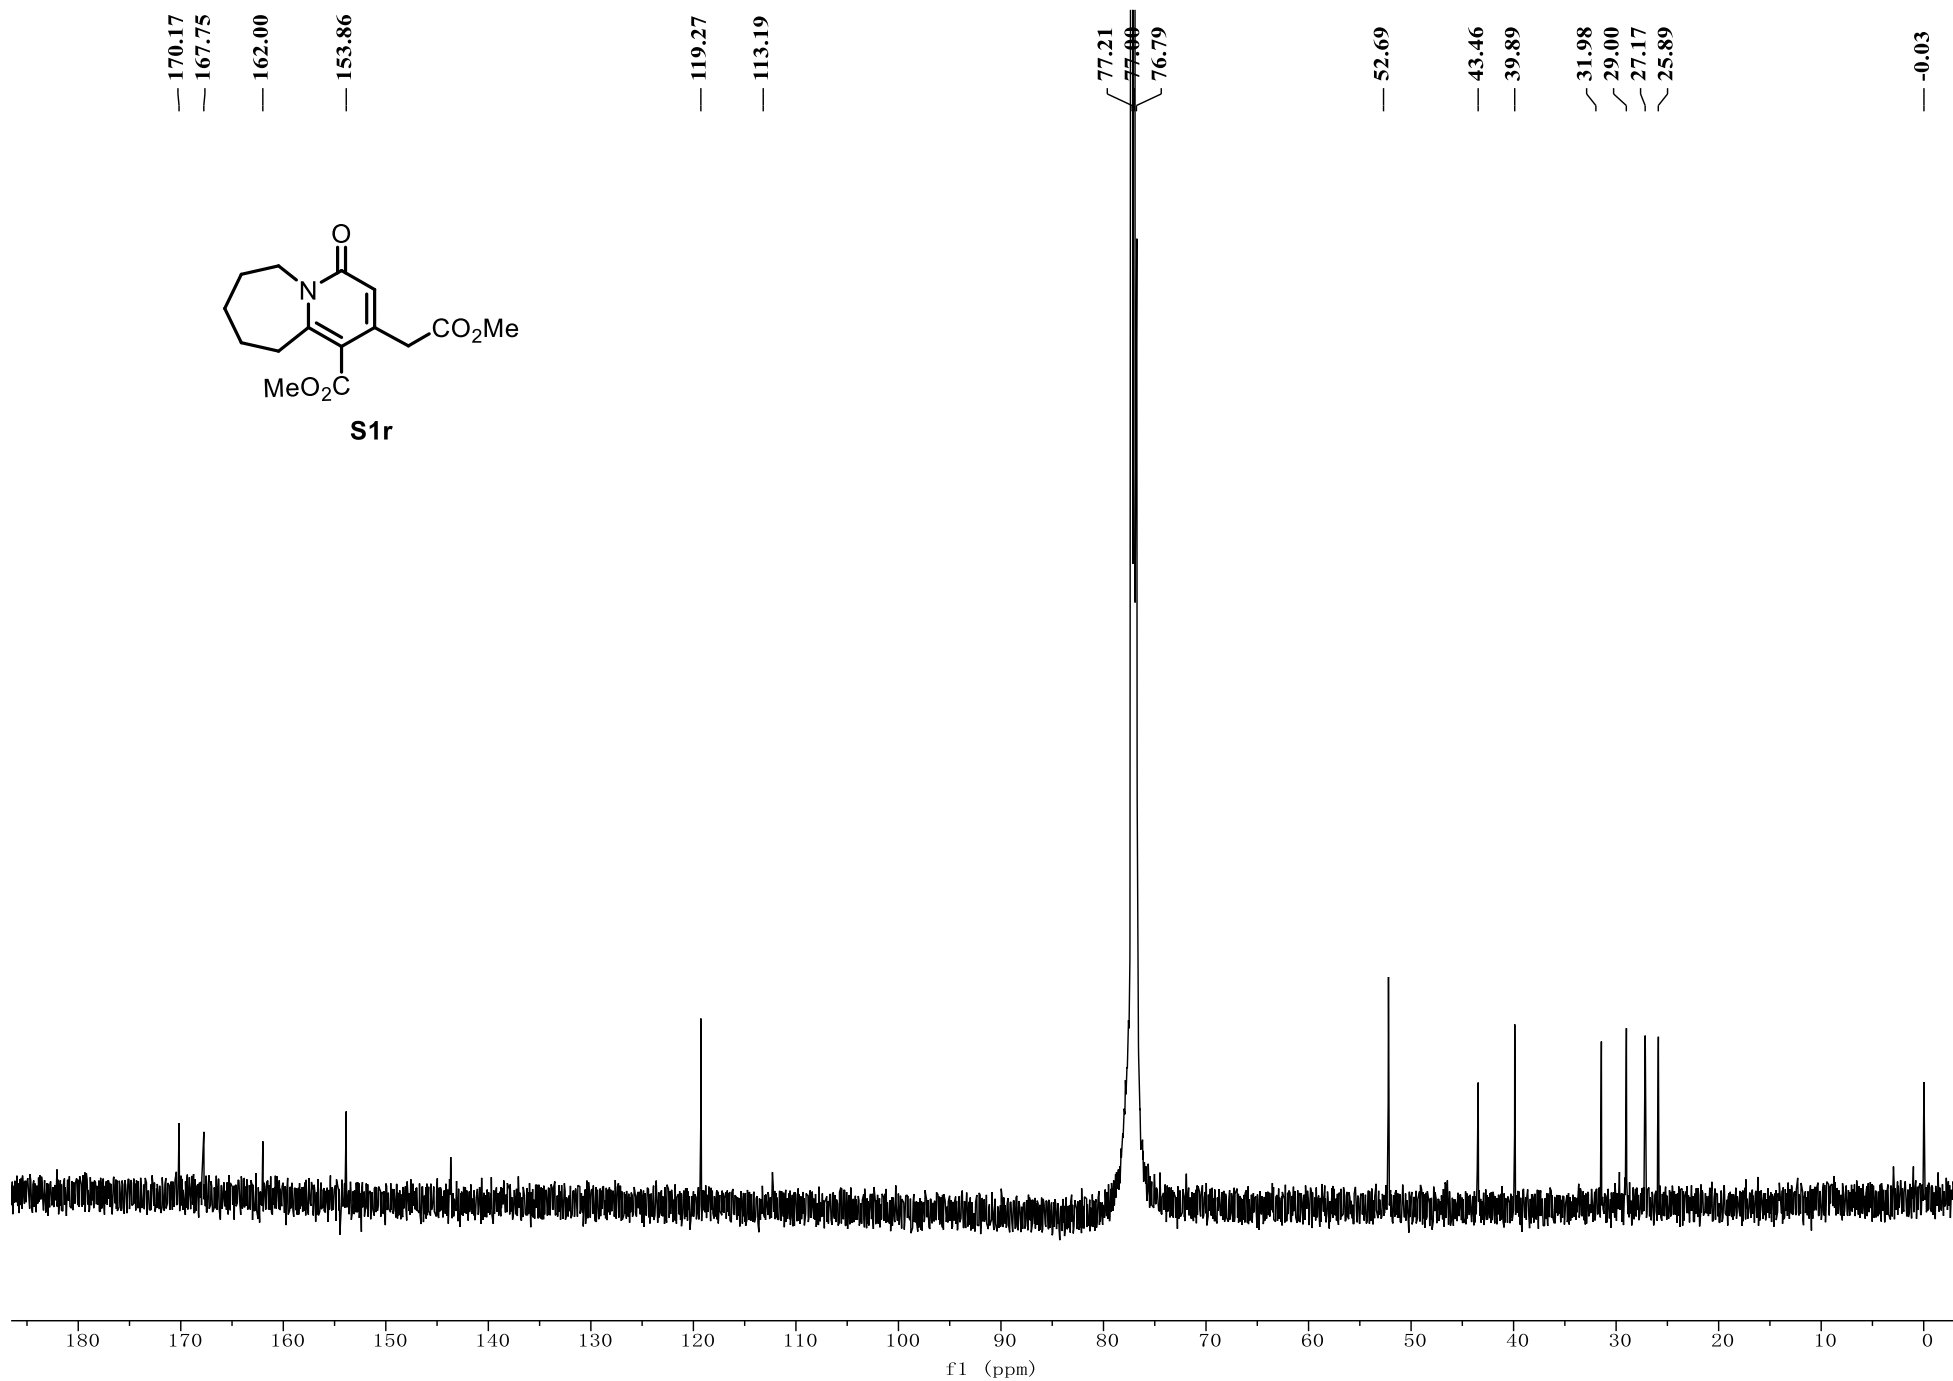

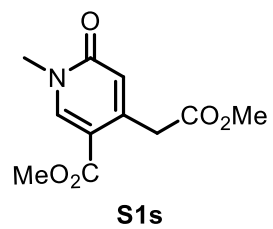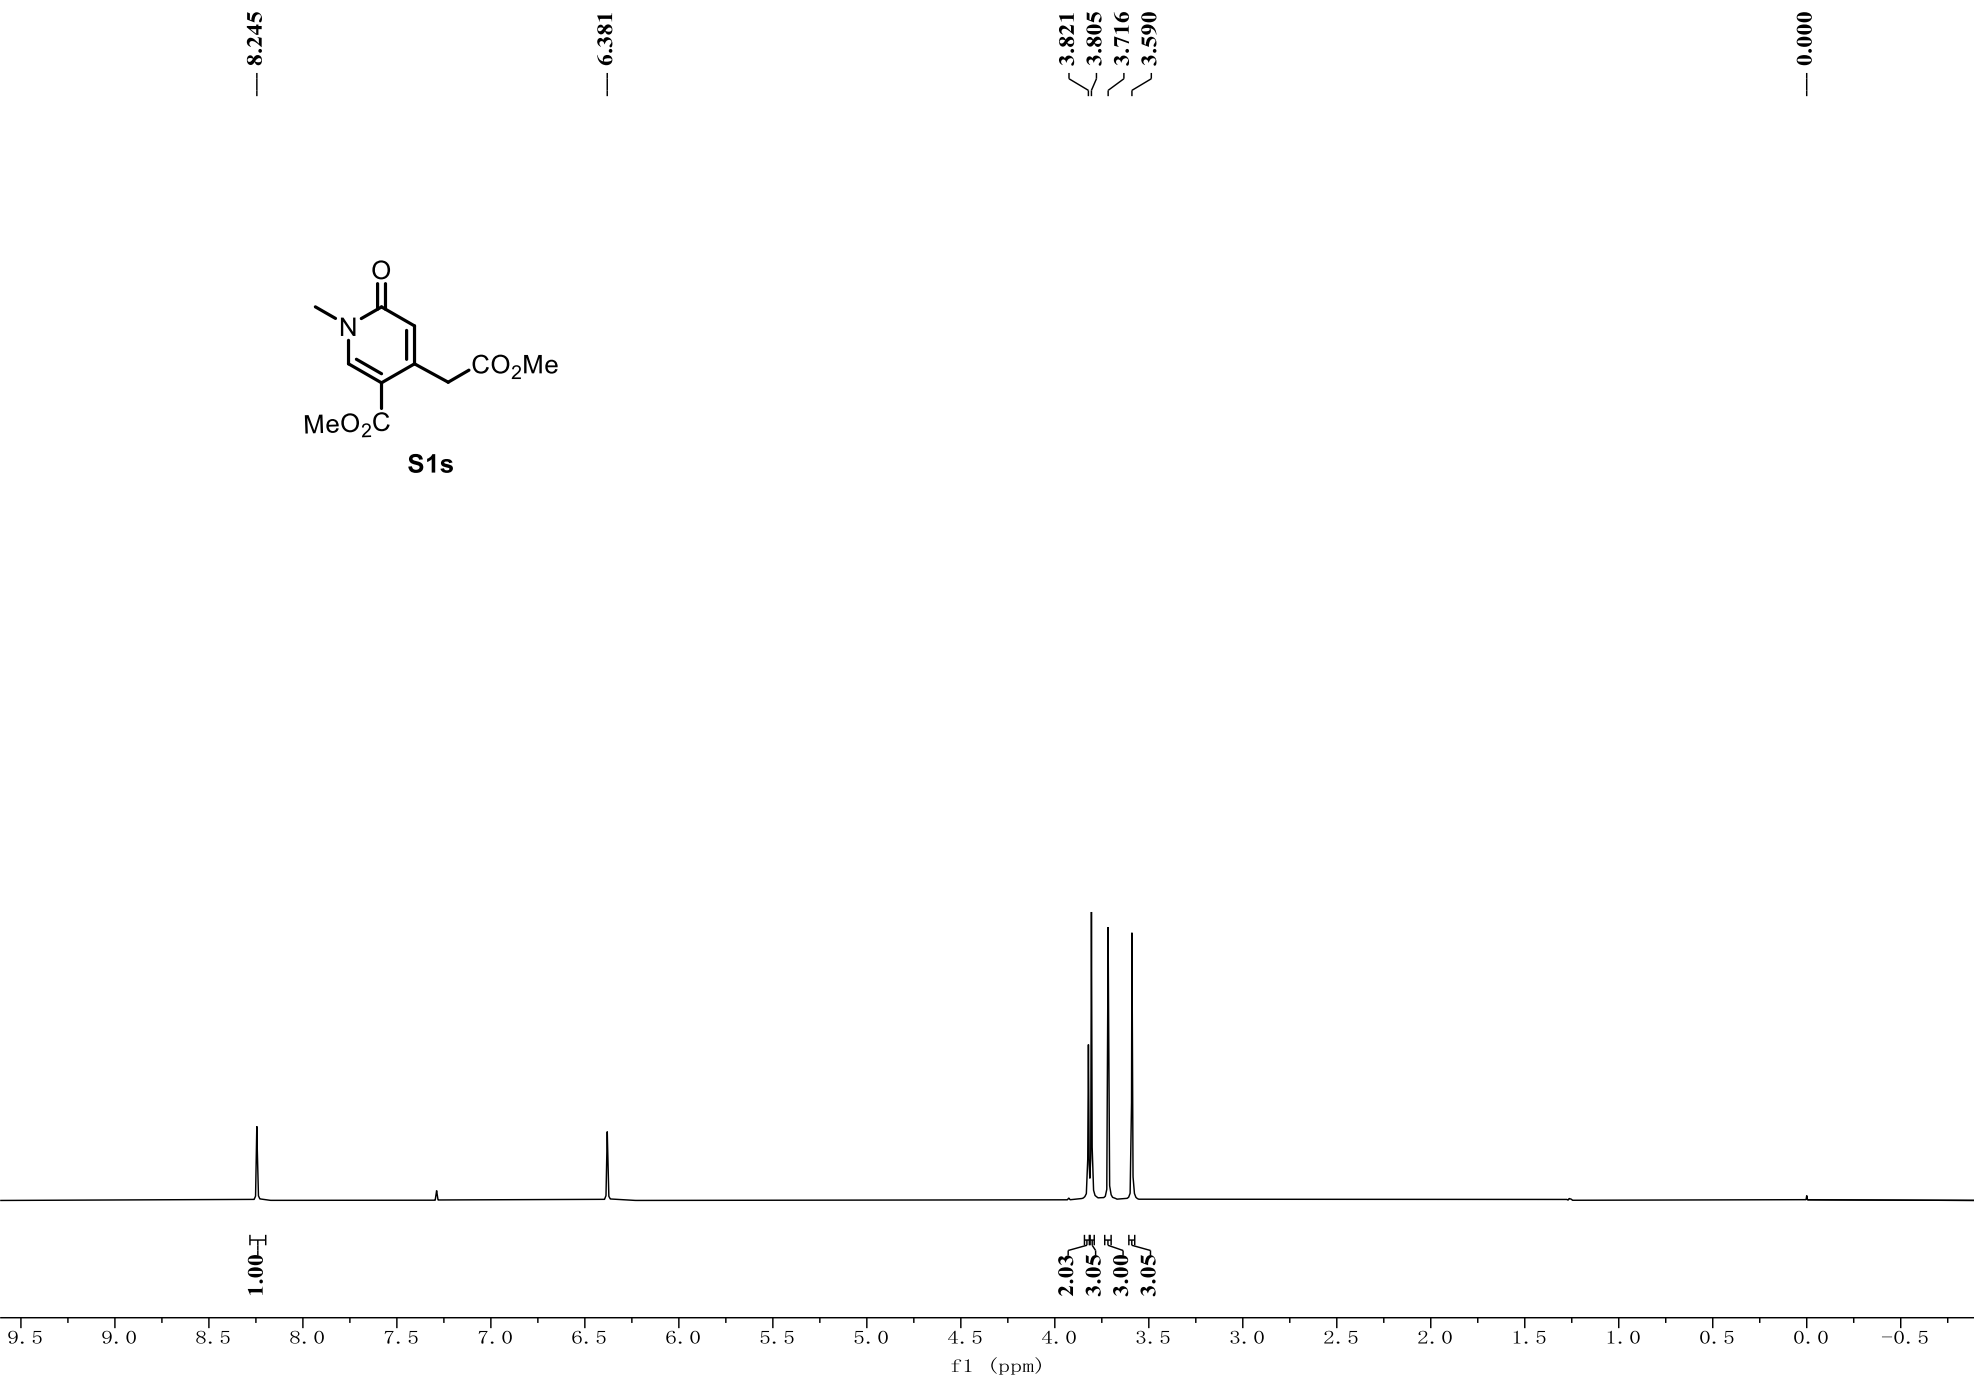

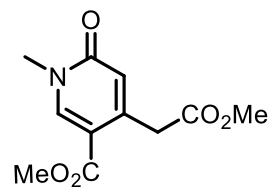

**S1s**

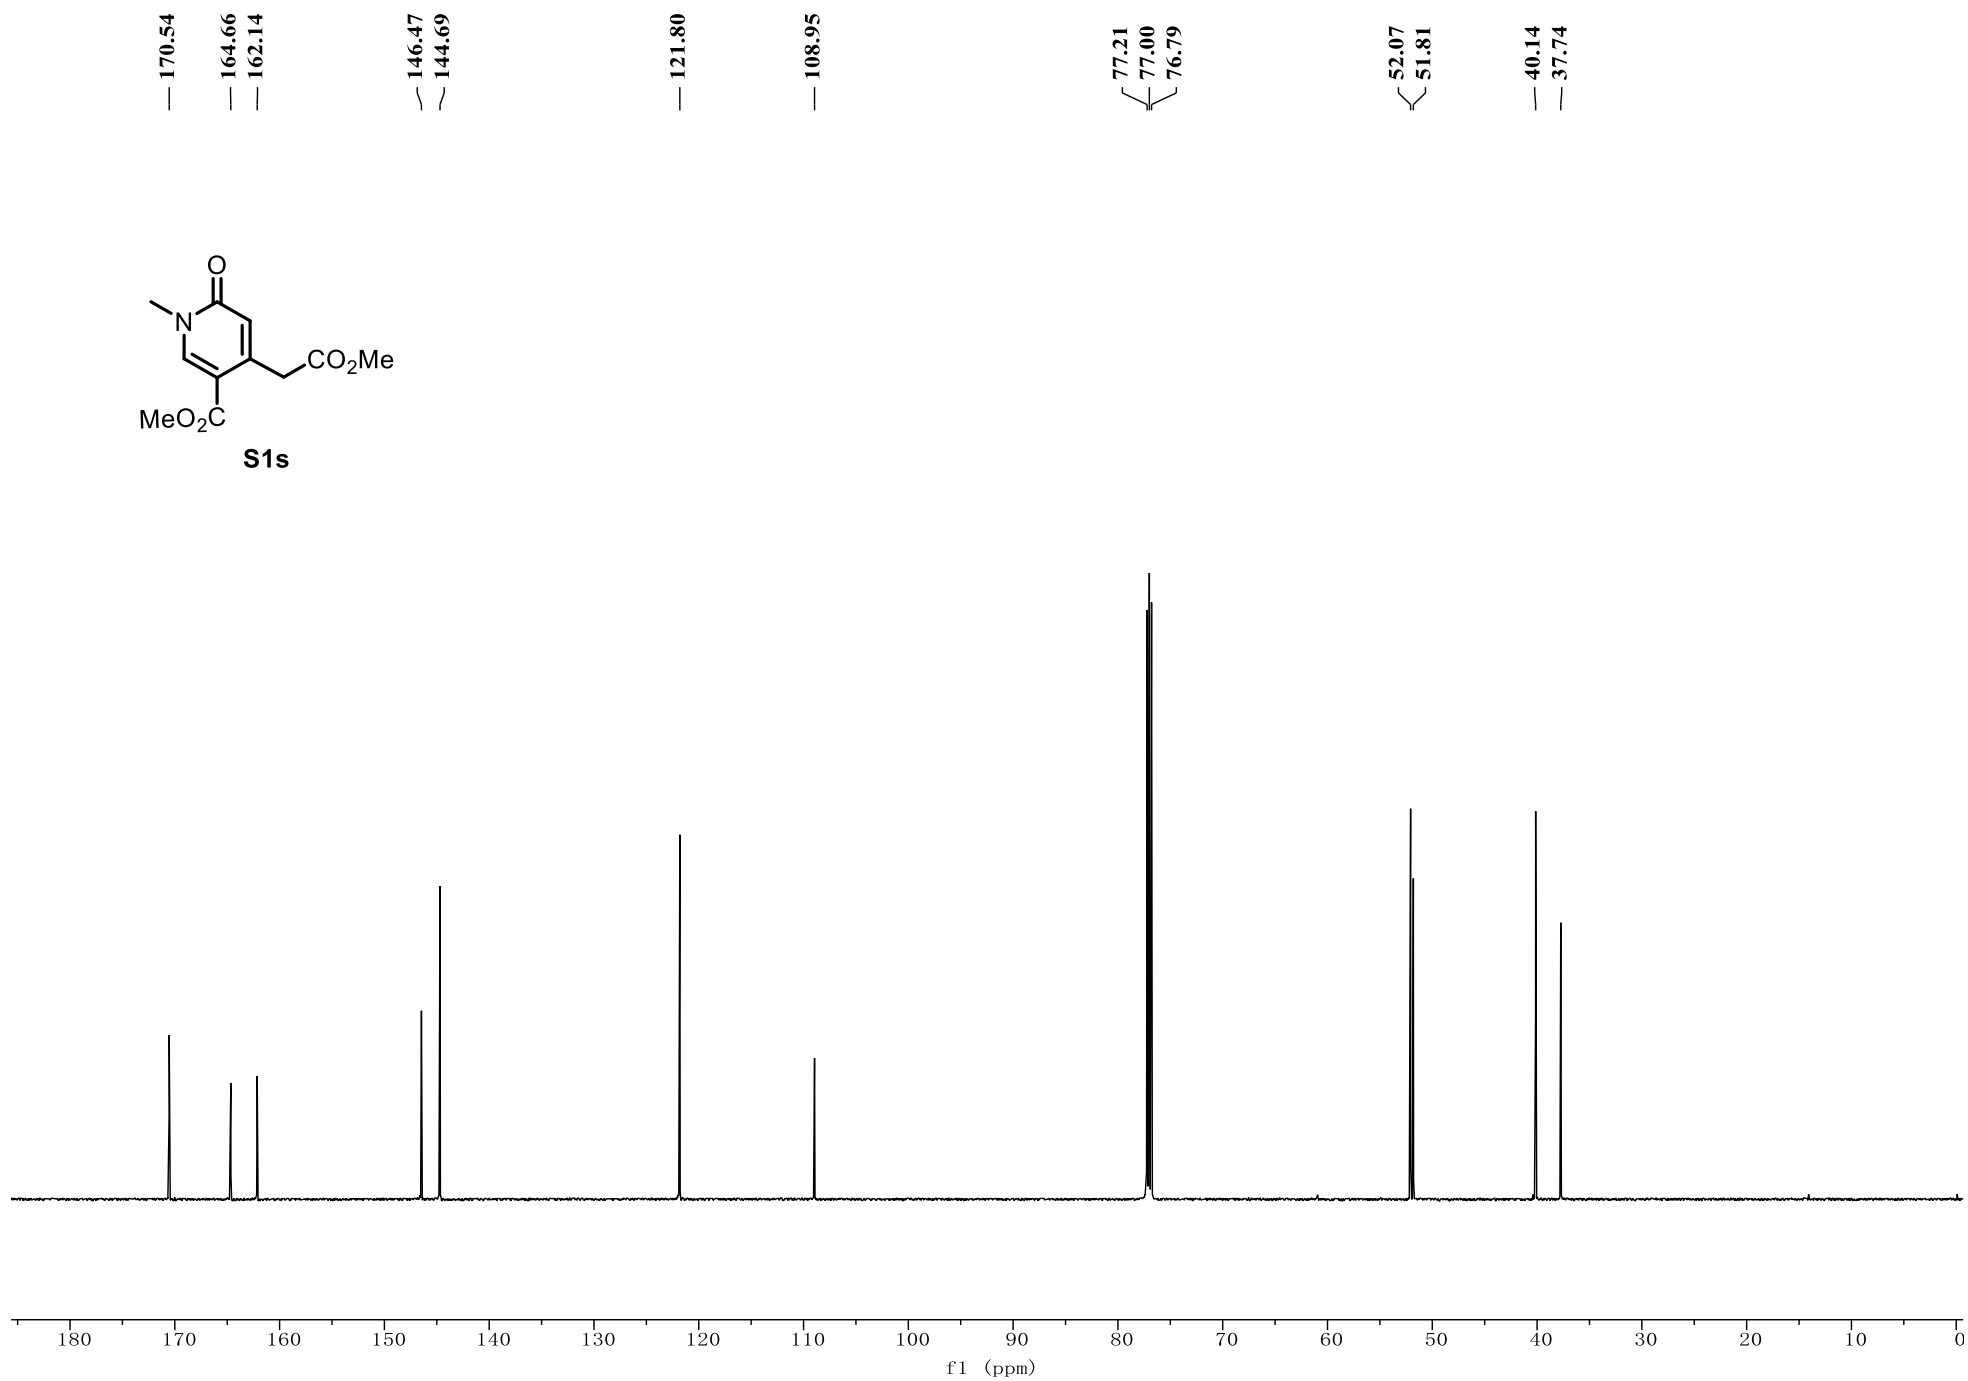

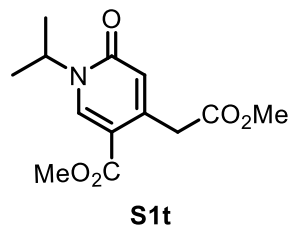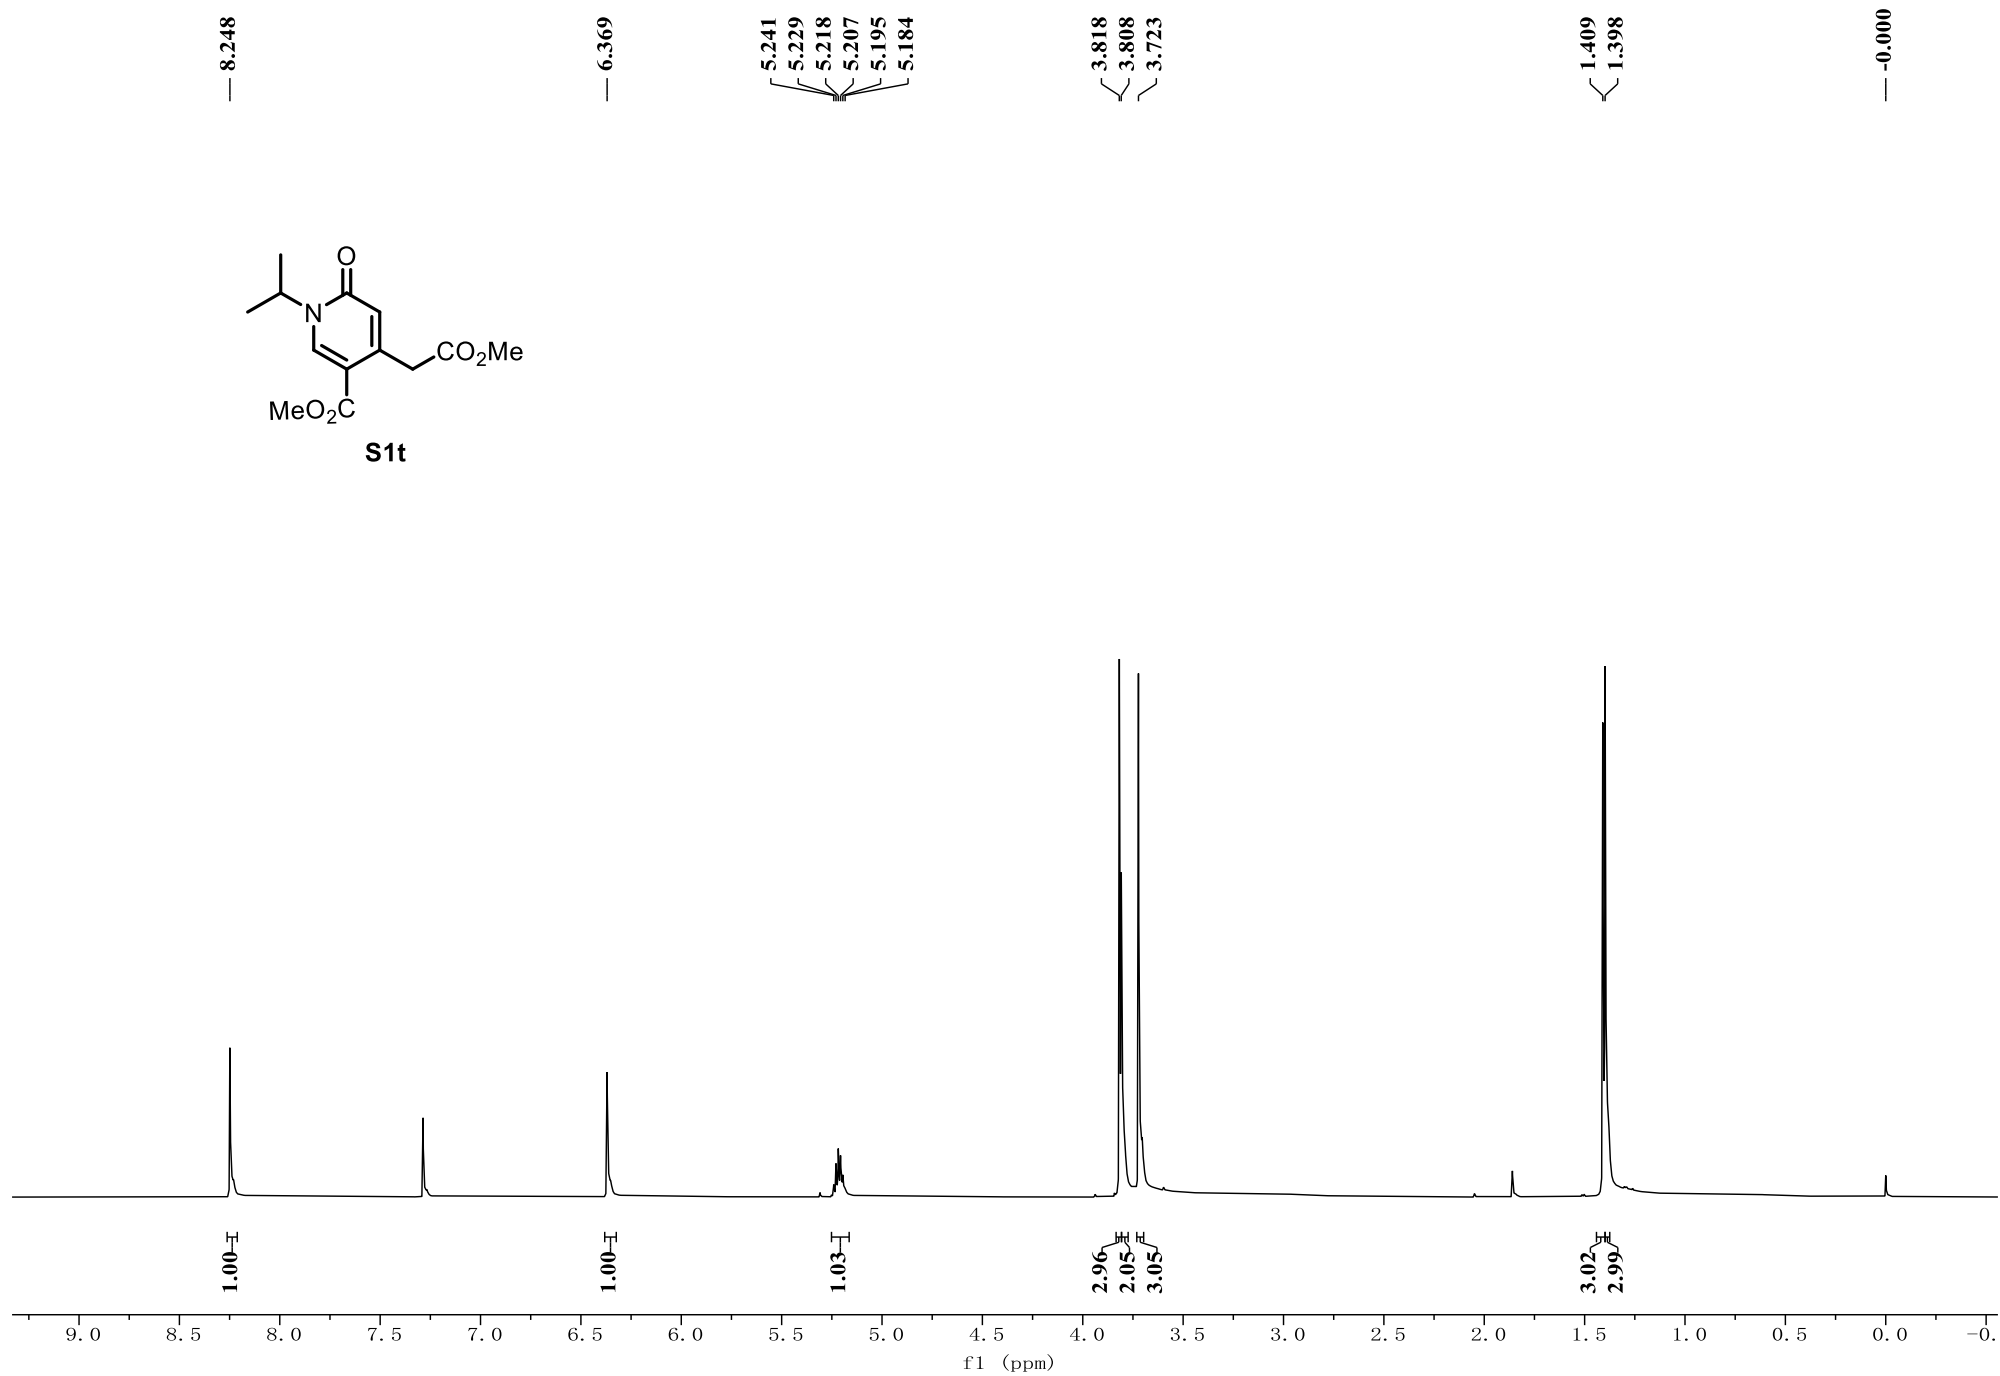

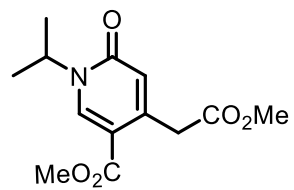

**S1t**

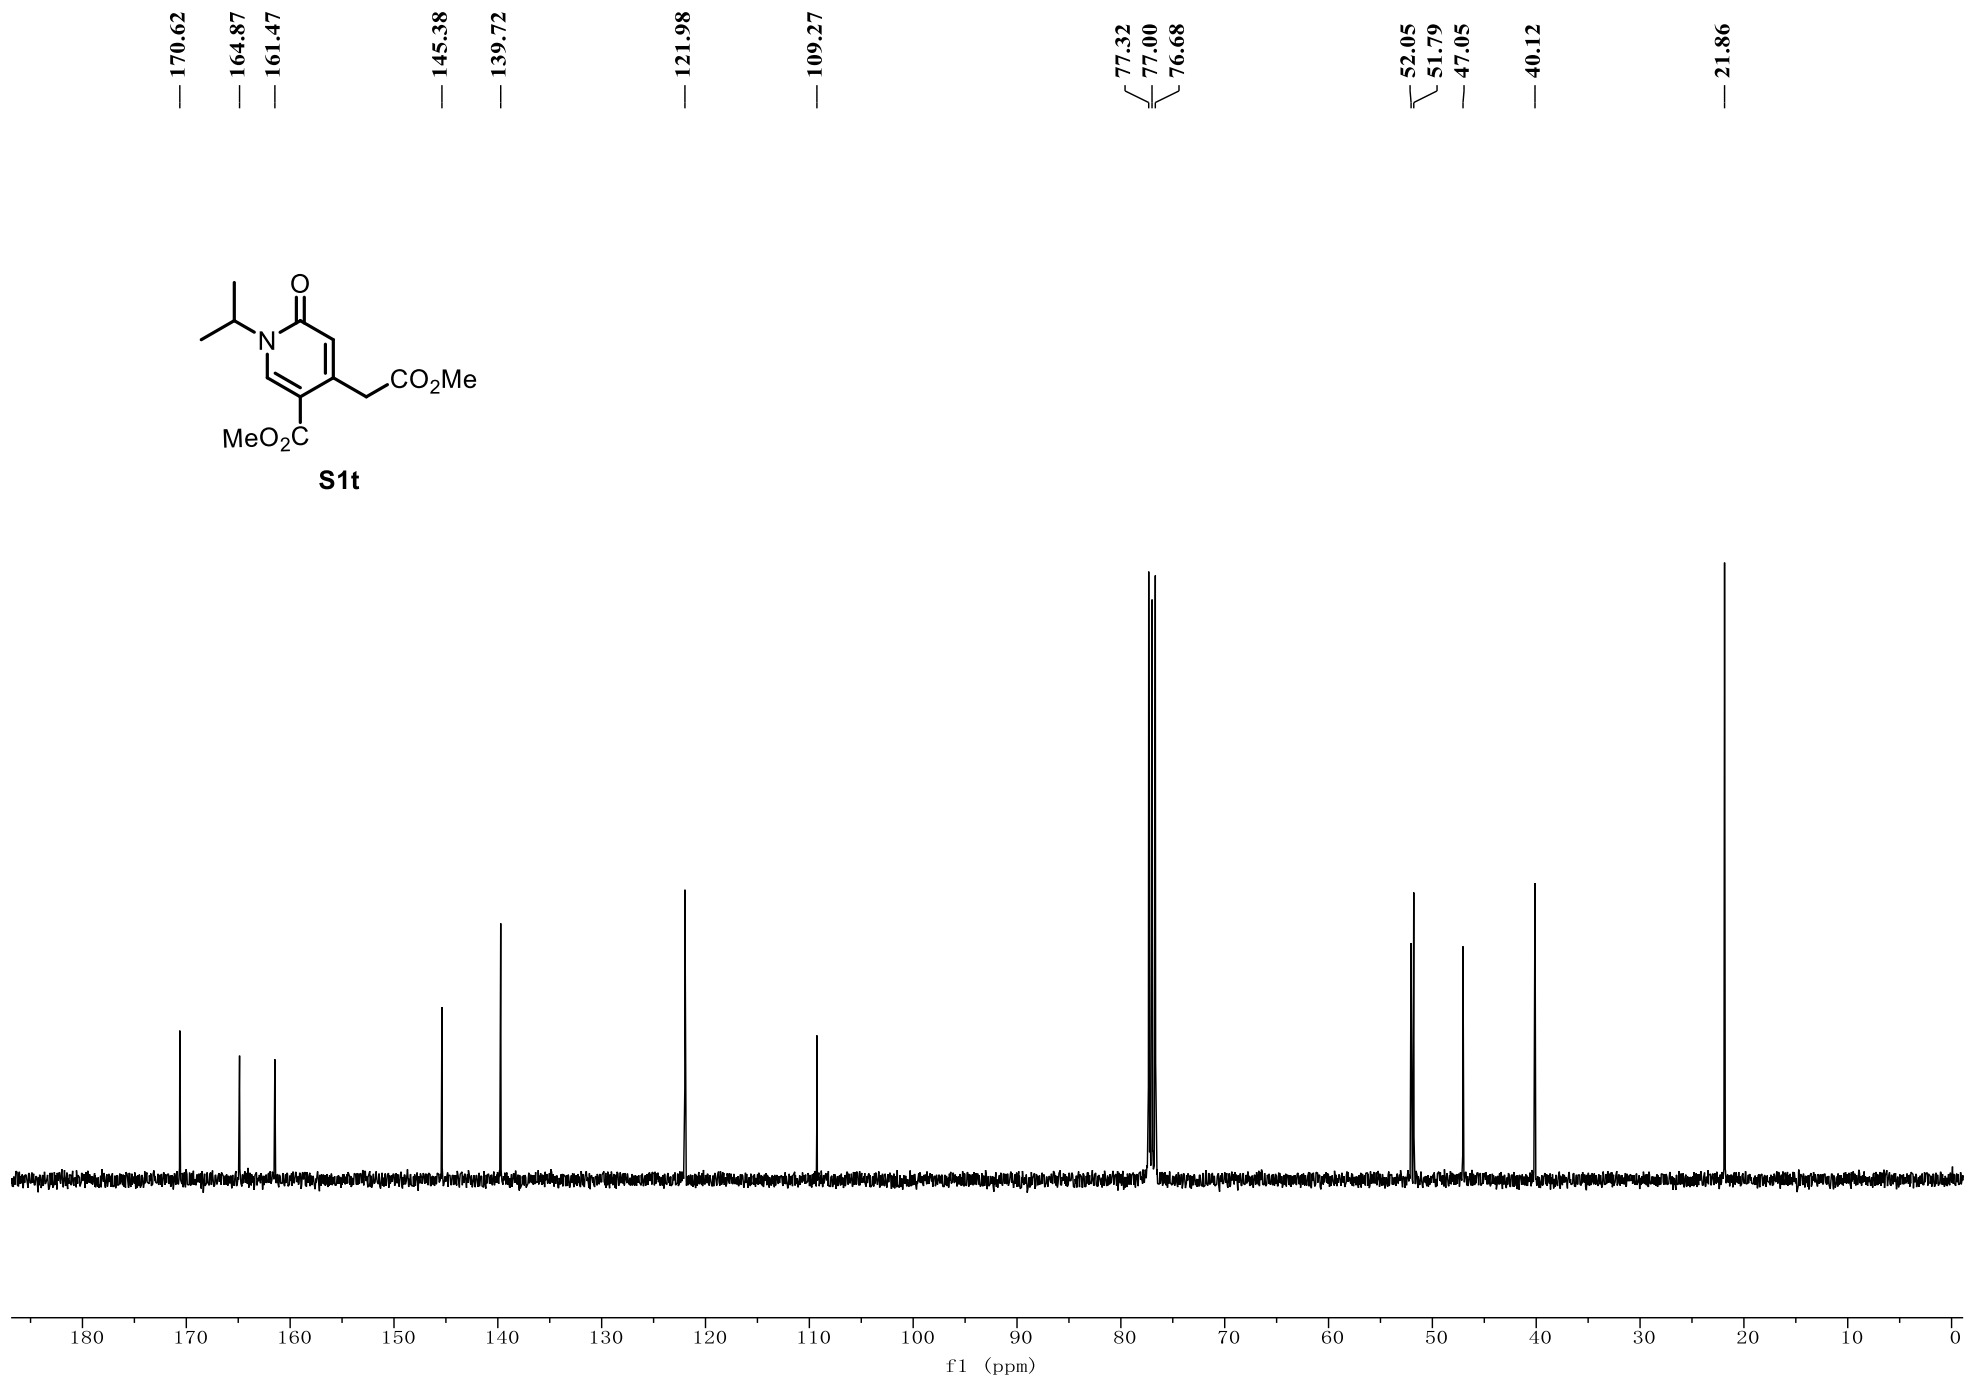

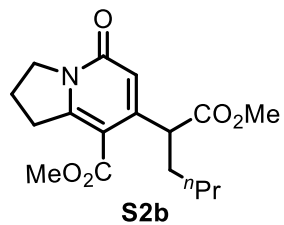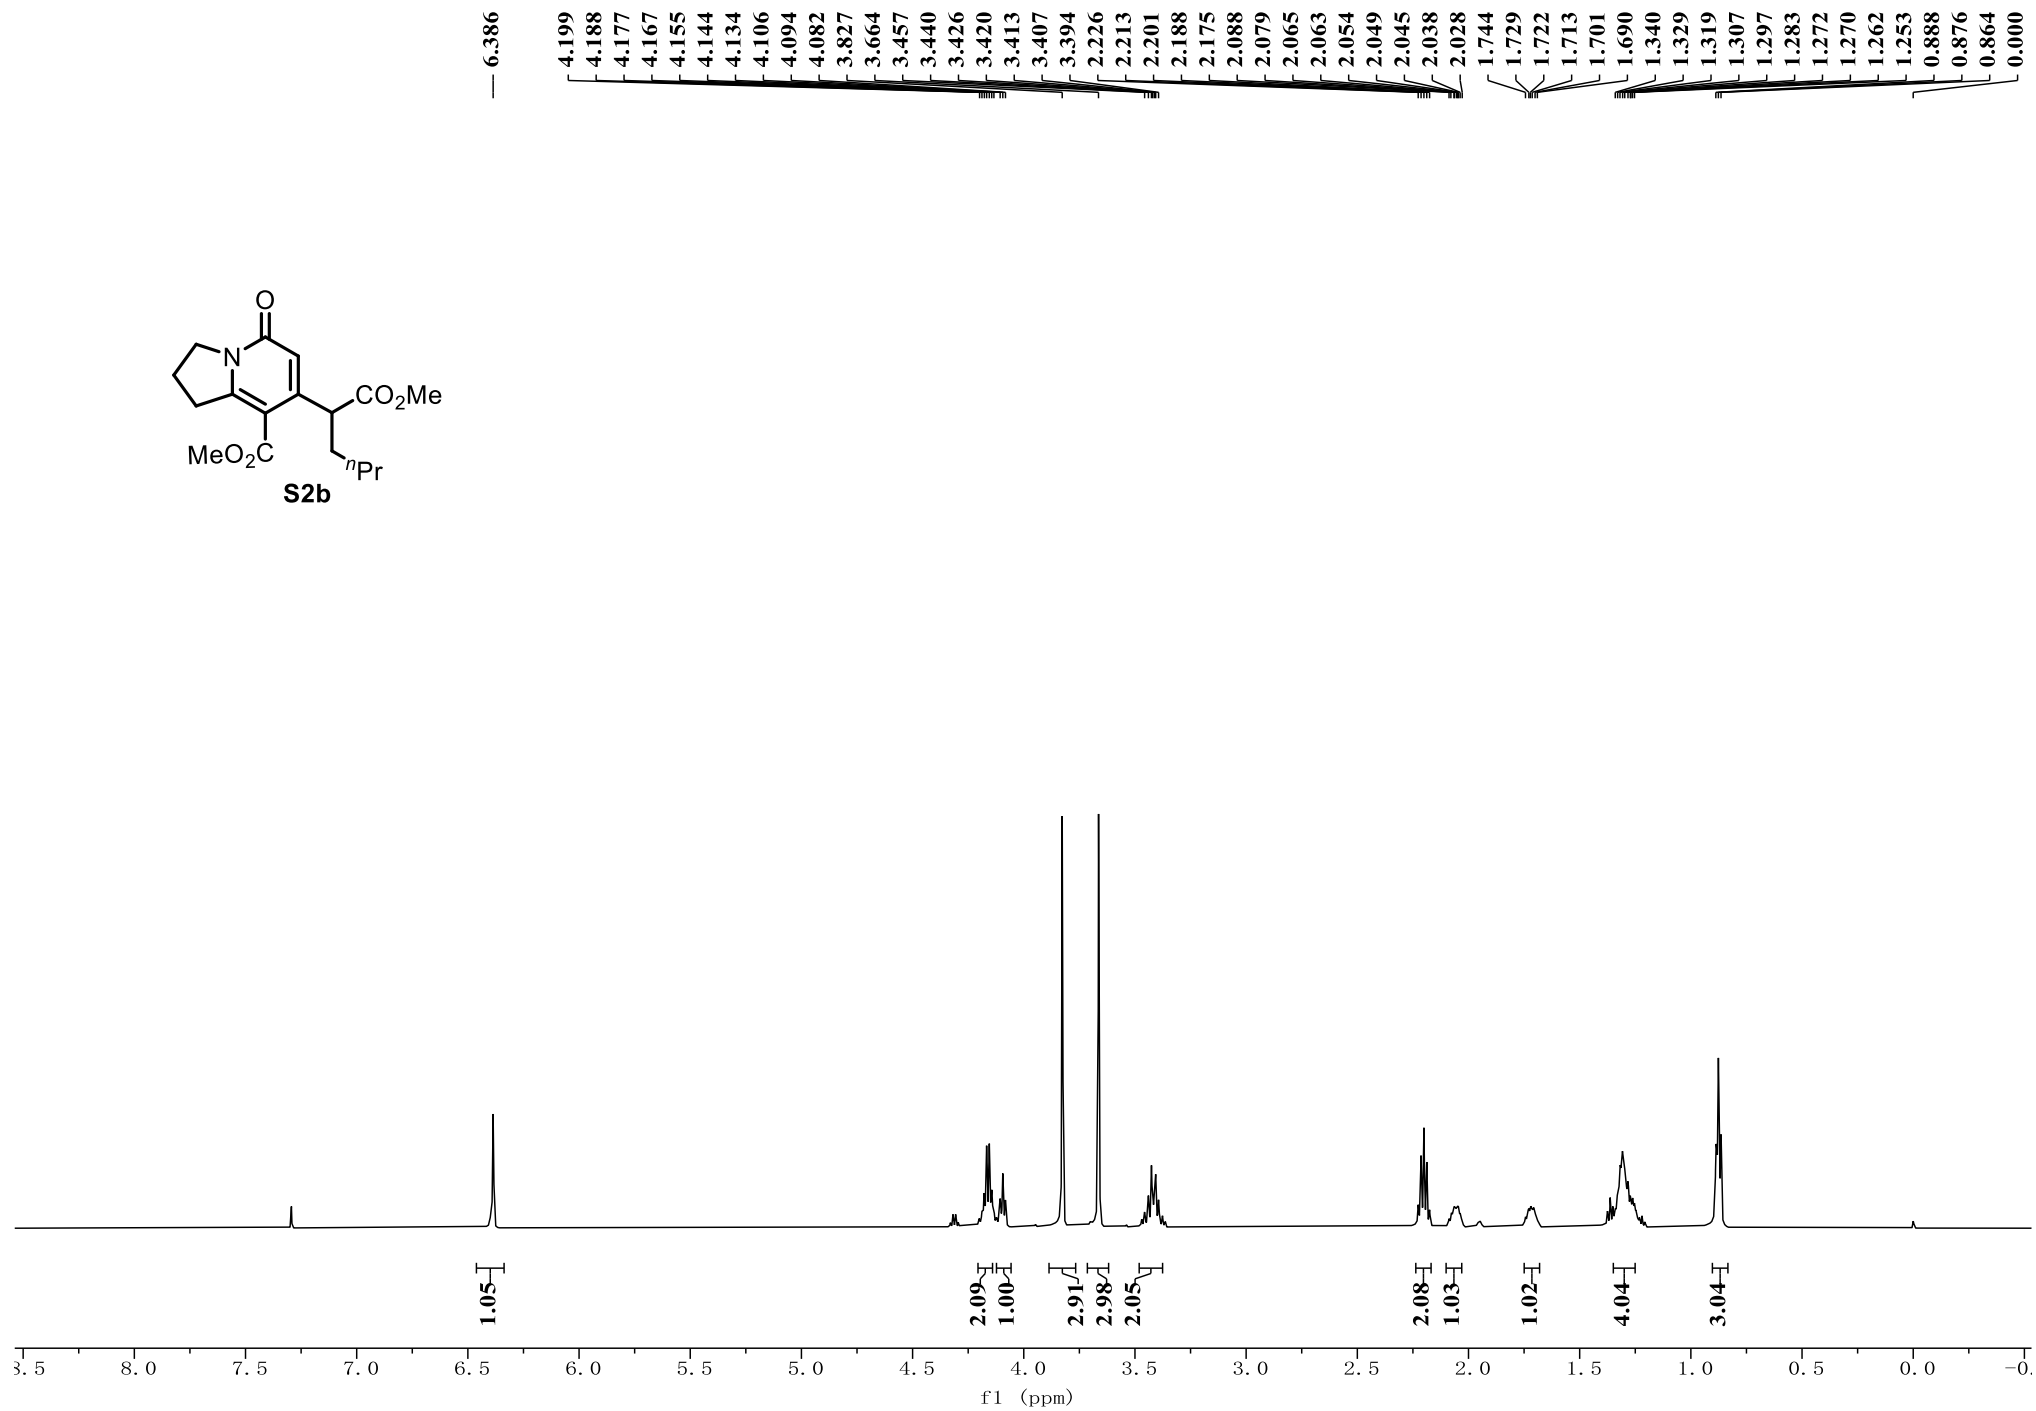

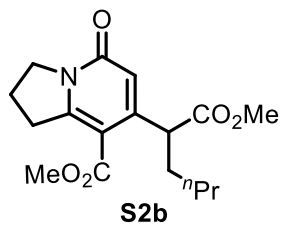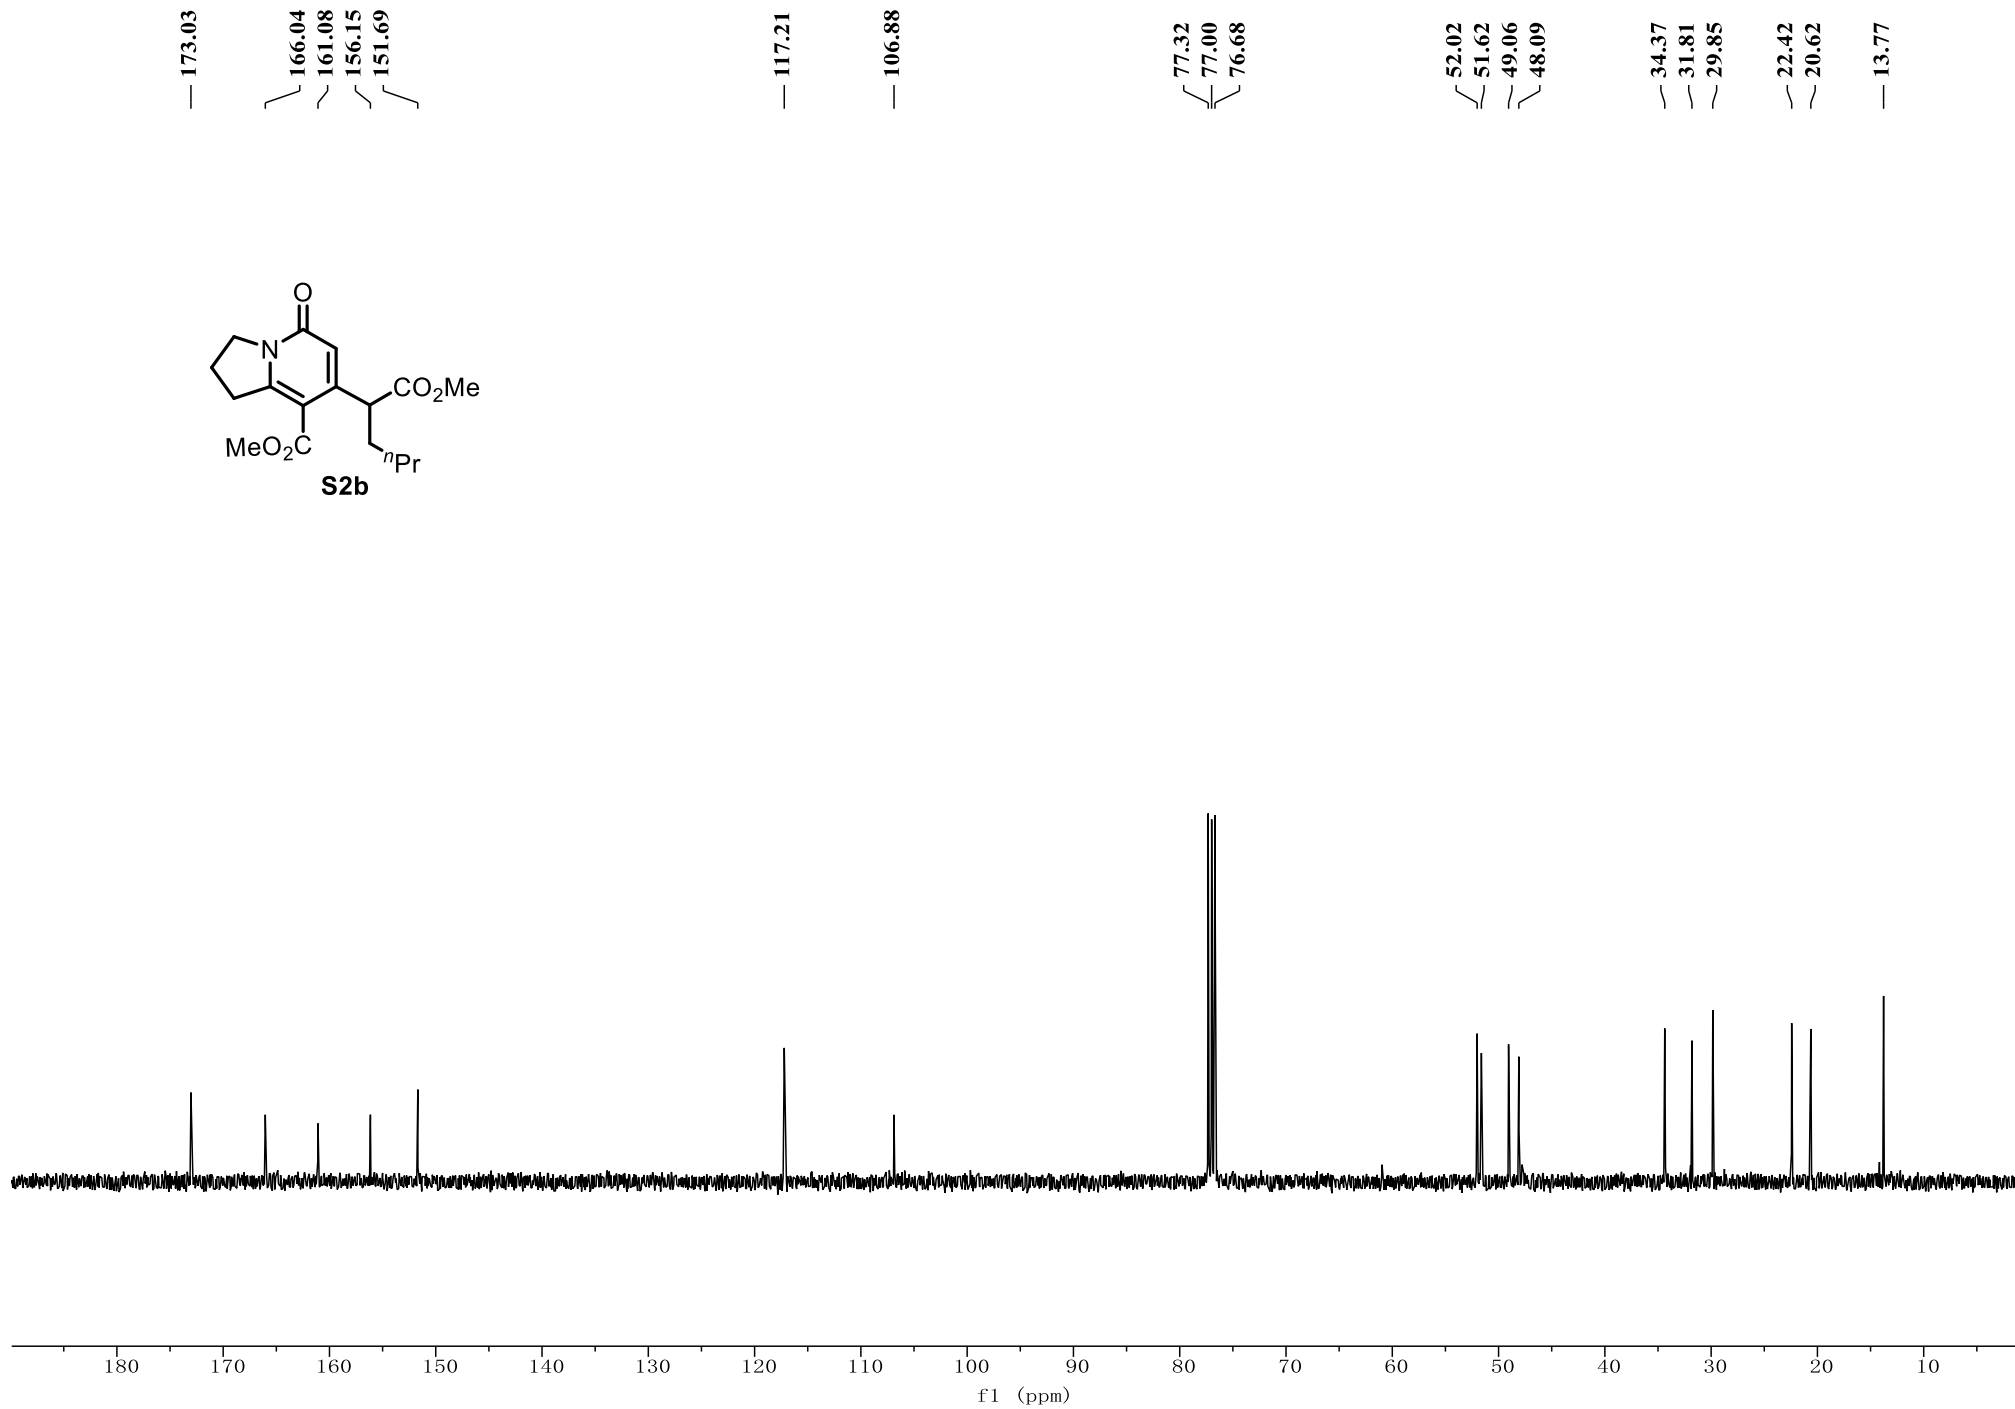

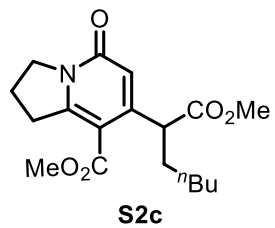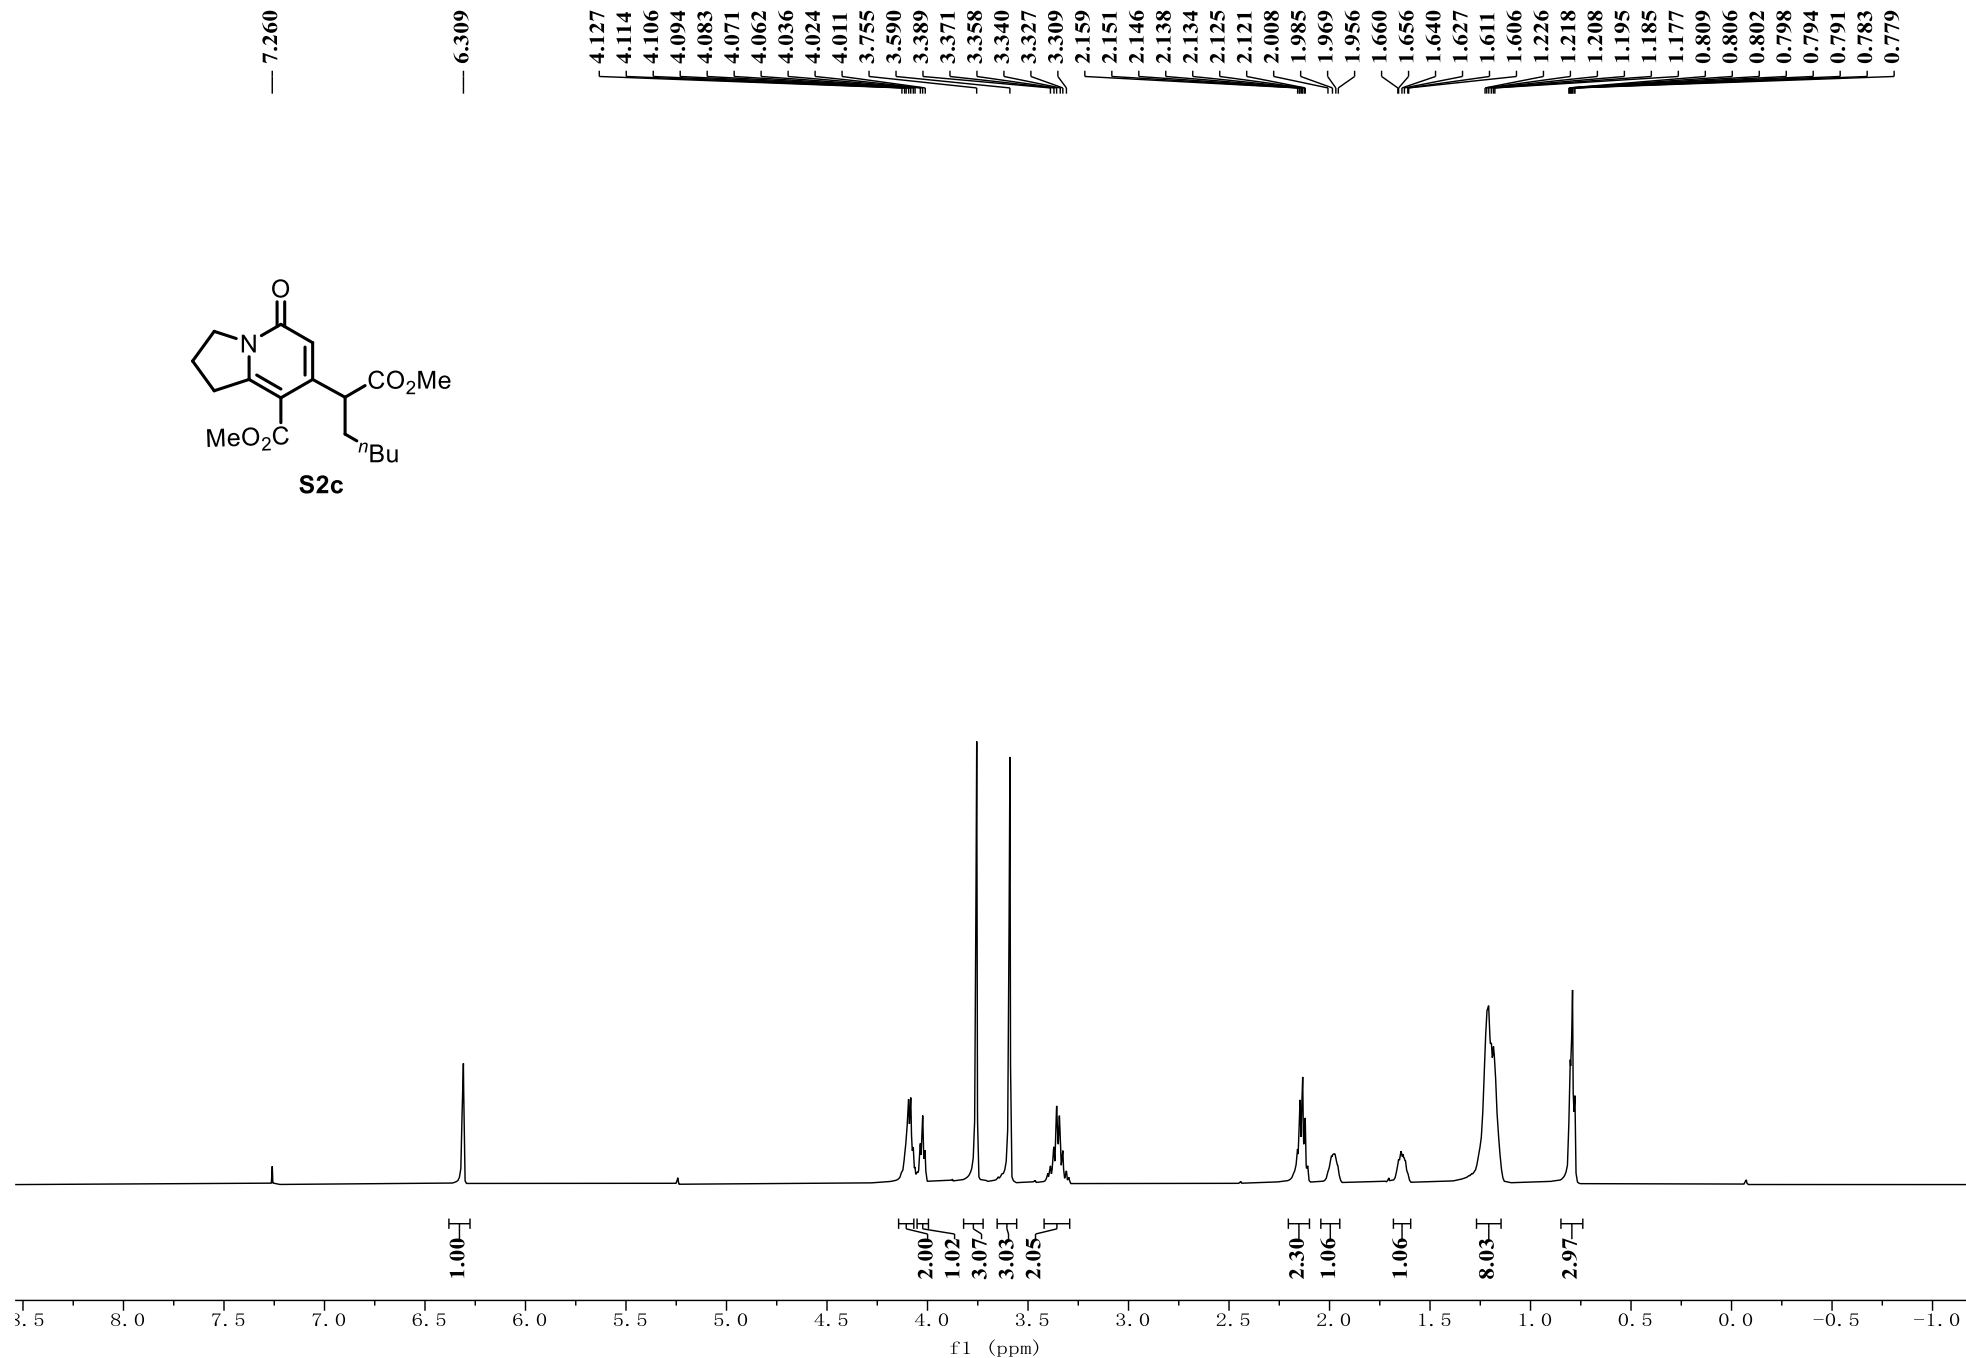

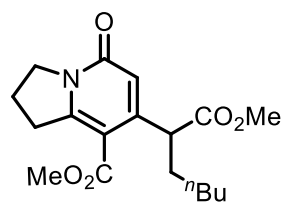

**S2c**

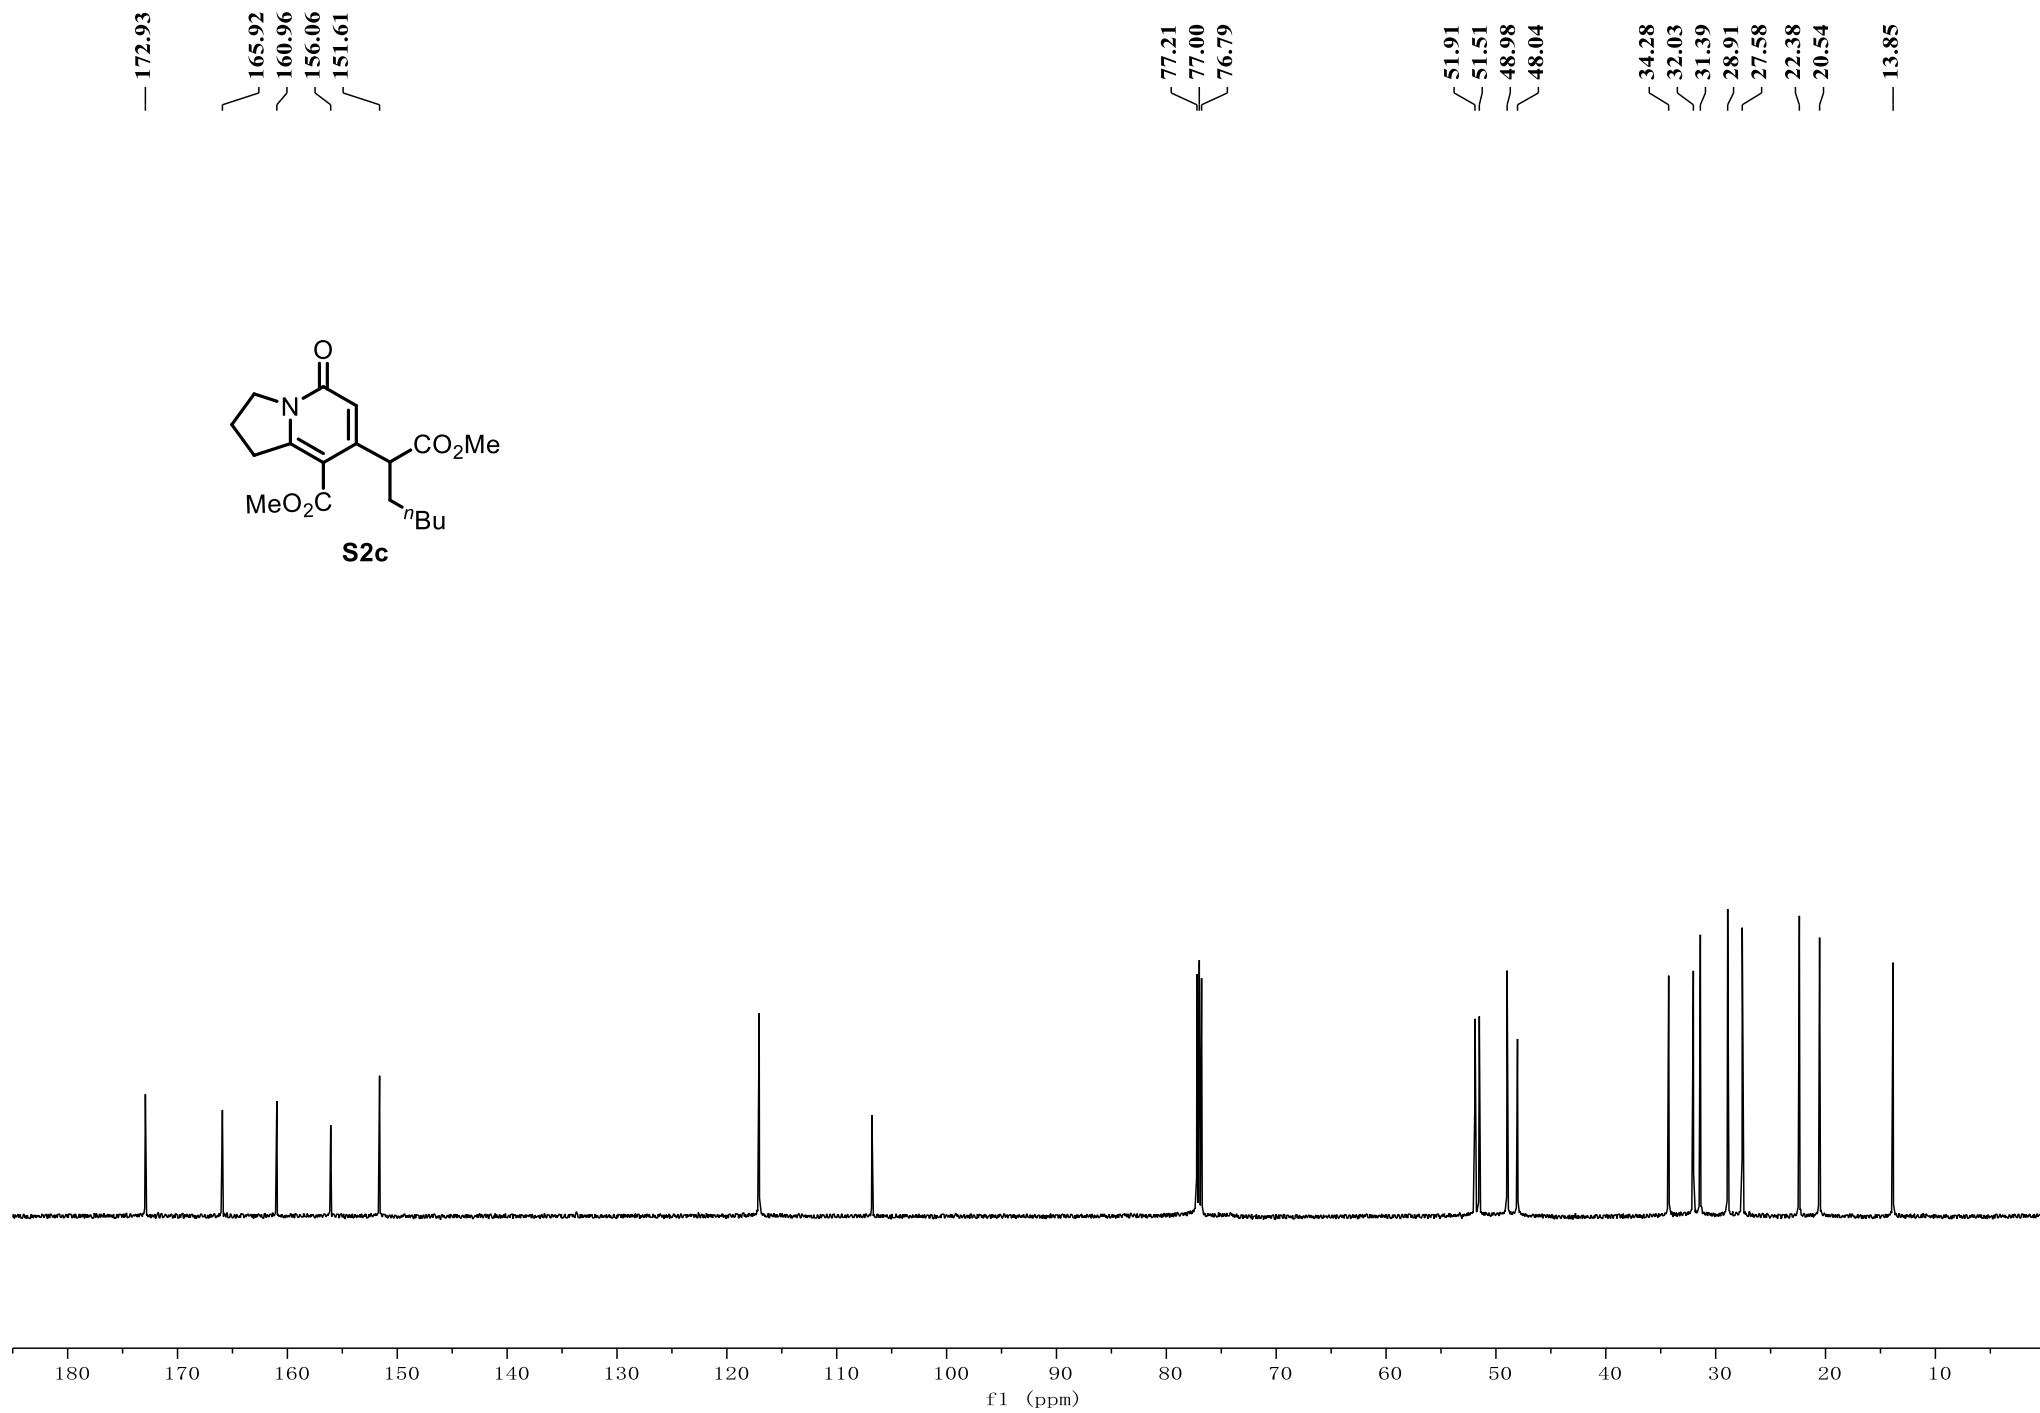

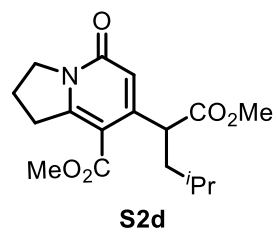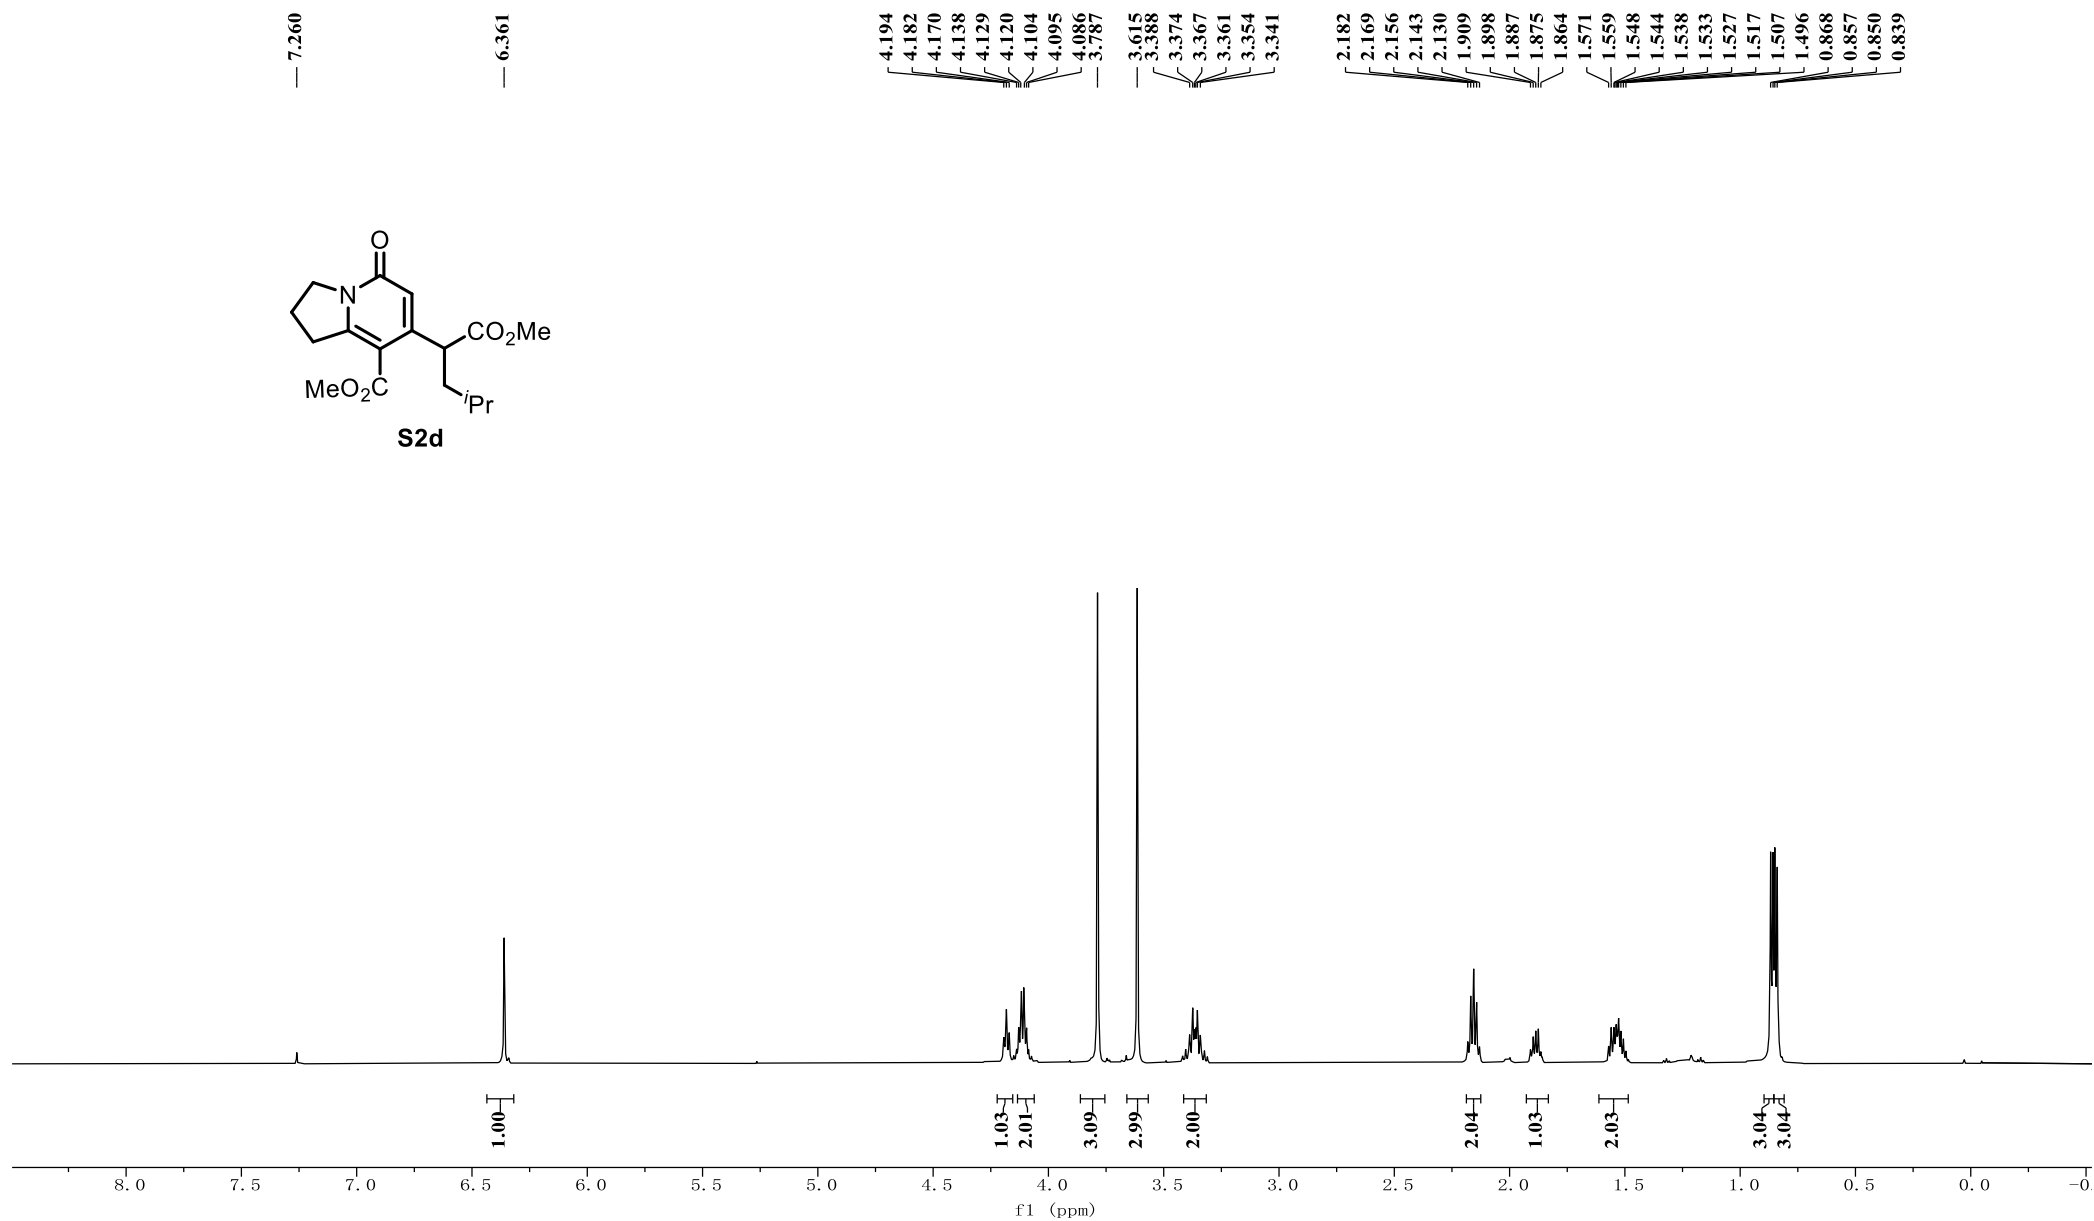

— 173.10

166.01  
161.01  
156.06  
151.68

— 117.22

— 106.84

77.32  
77.00  
76.68

52.06  
51.66  
49.03  
45.85  
41.00

— 34.28

25.87  
22.53  
22.07  
20.60

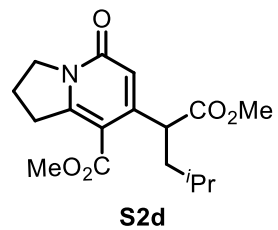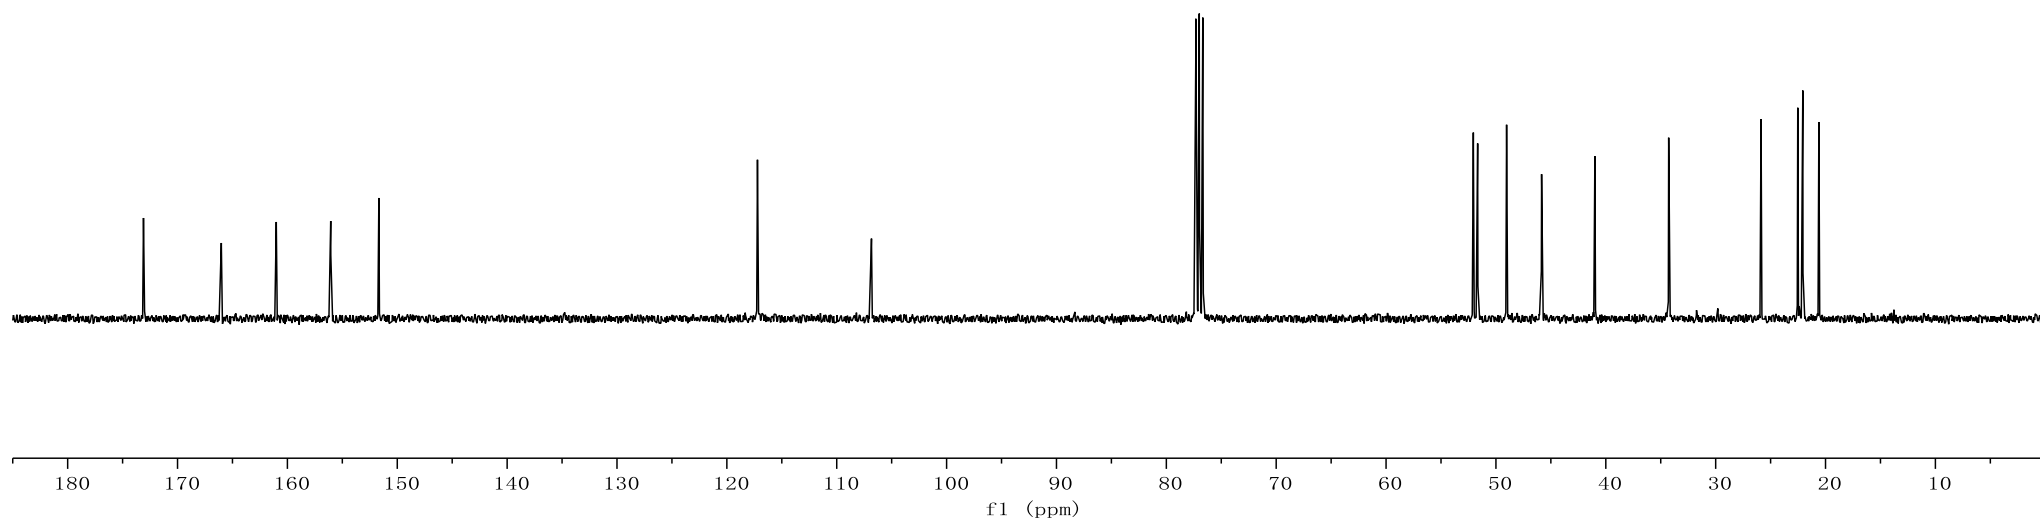

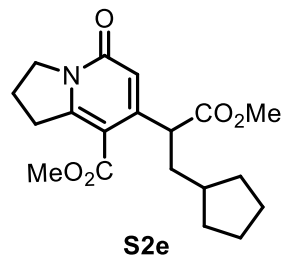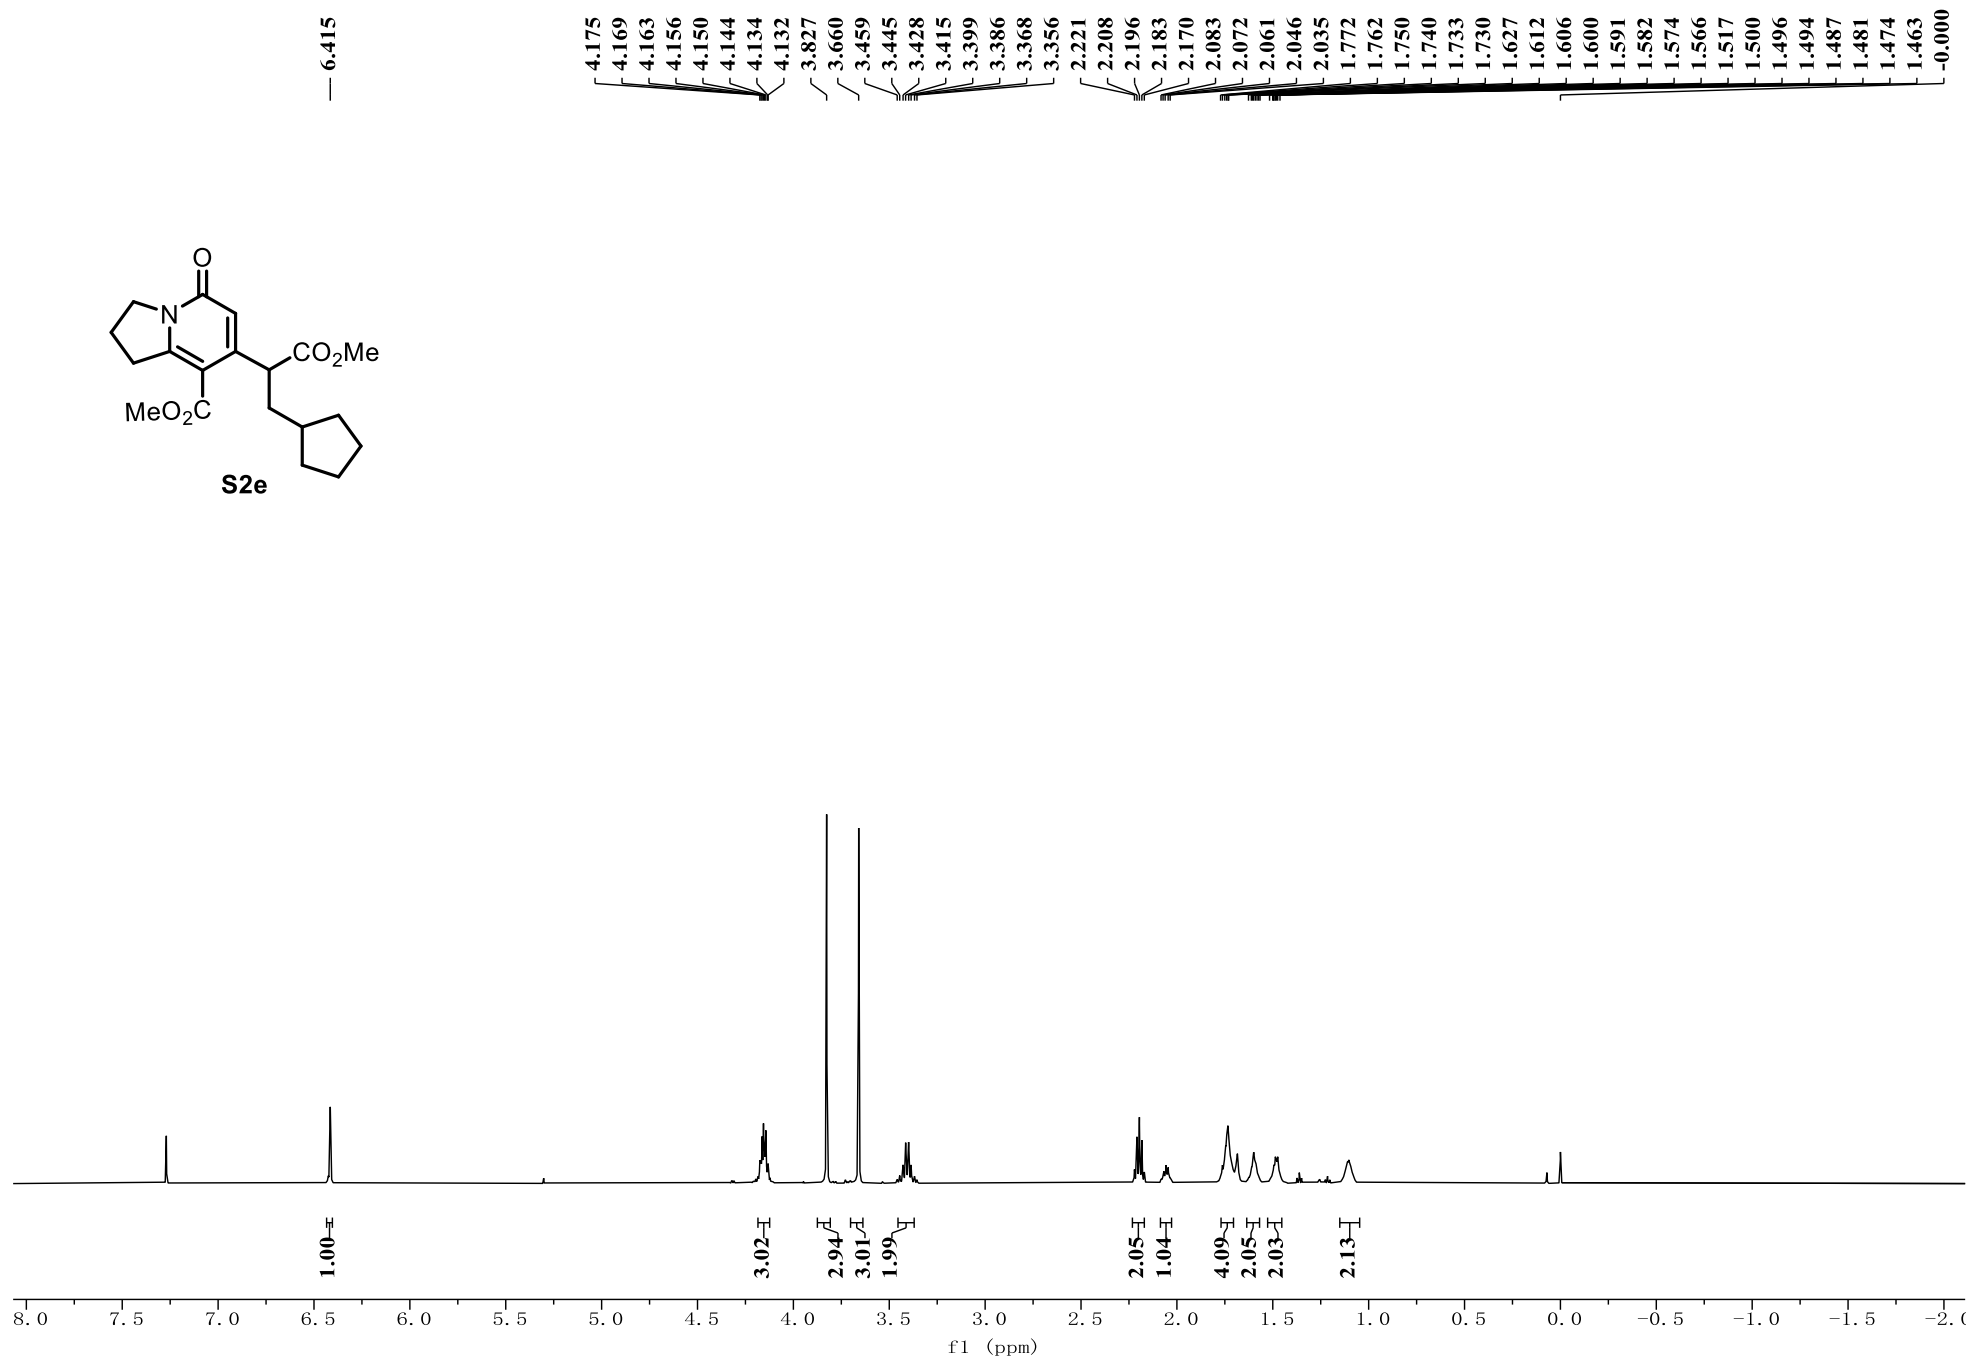

— 173.16  
166.12  
161.14  
156.12  
151.75

— 117.53  
— 106.98

77.21  
77.00  
76.79

52.12  
51.70  
49.12  
47.43  
38.34  
37.90  
34.35  
32.67  
32.25  
25.03  
24.99  
20.69

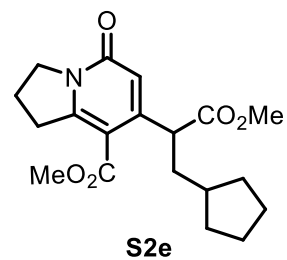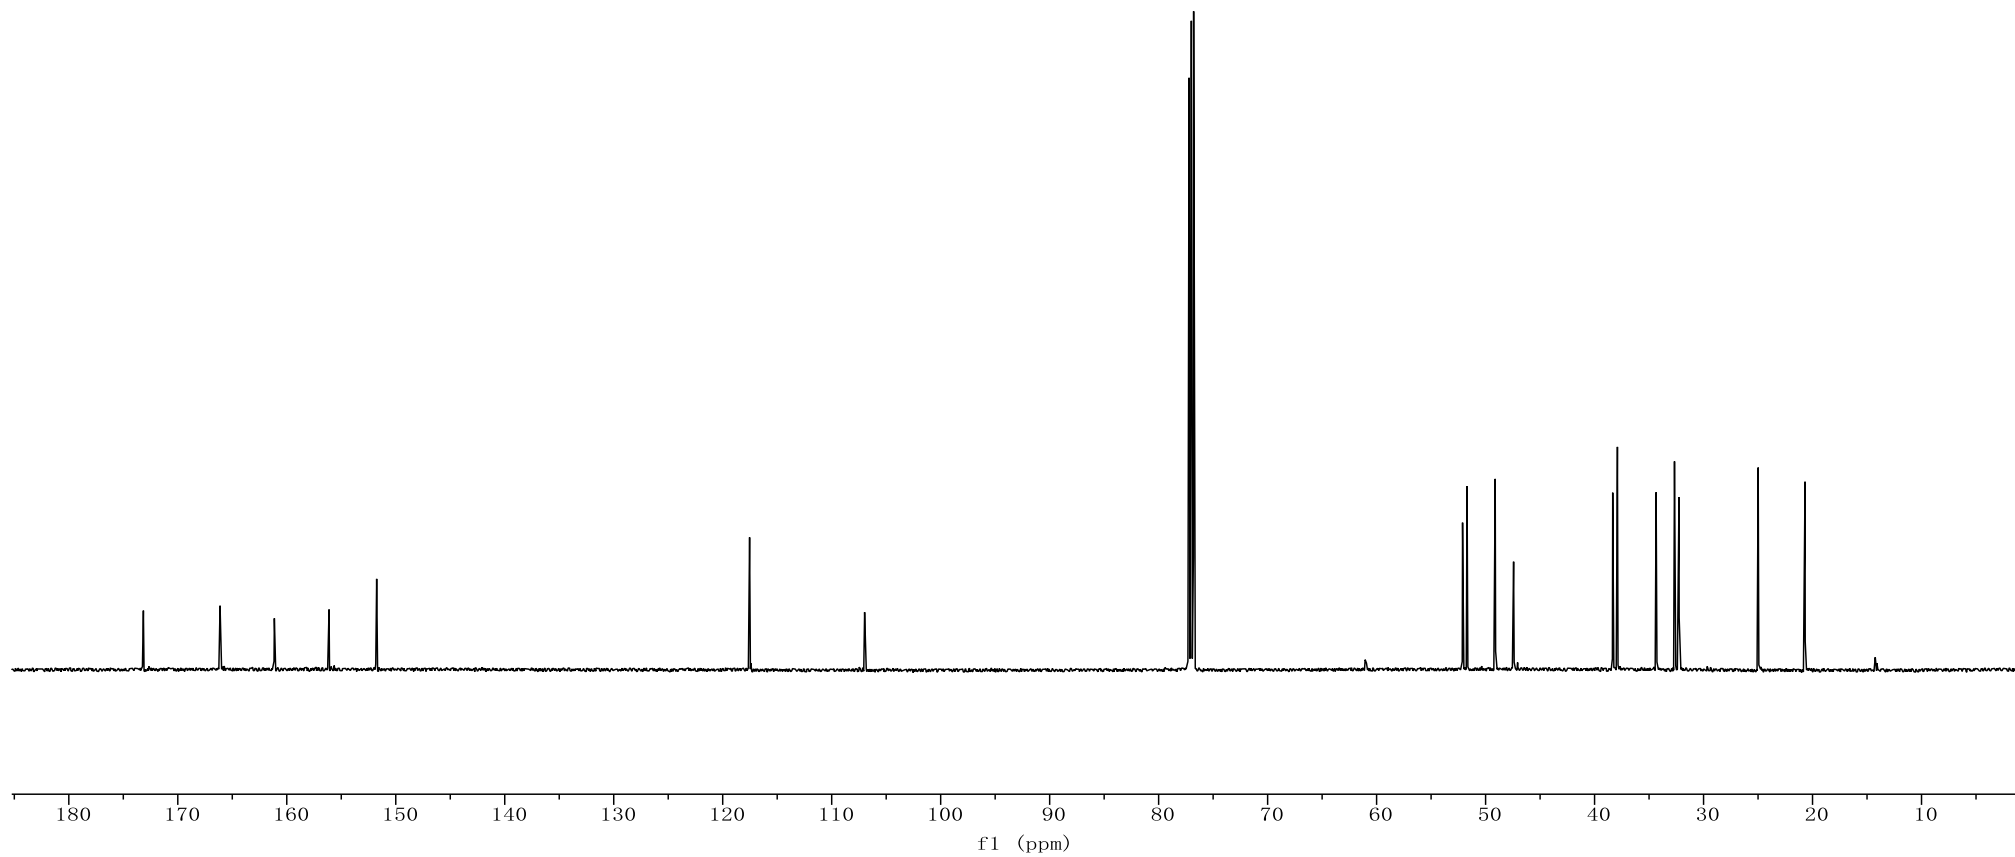

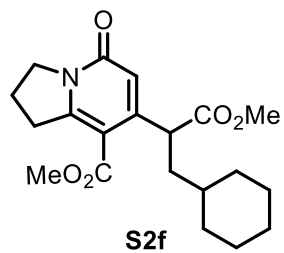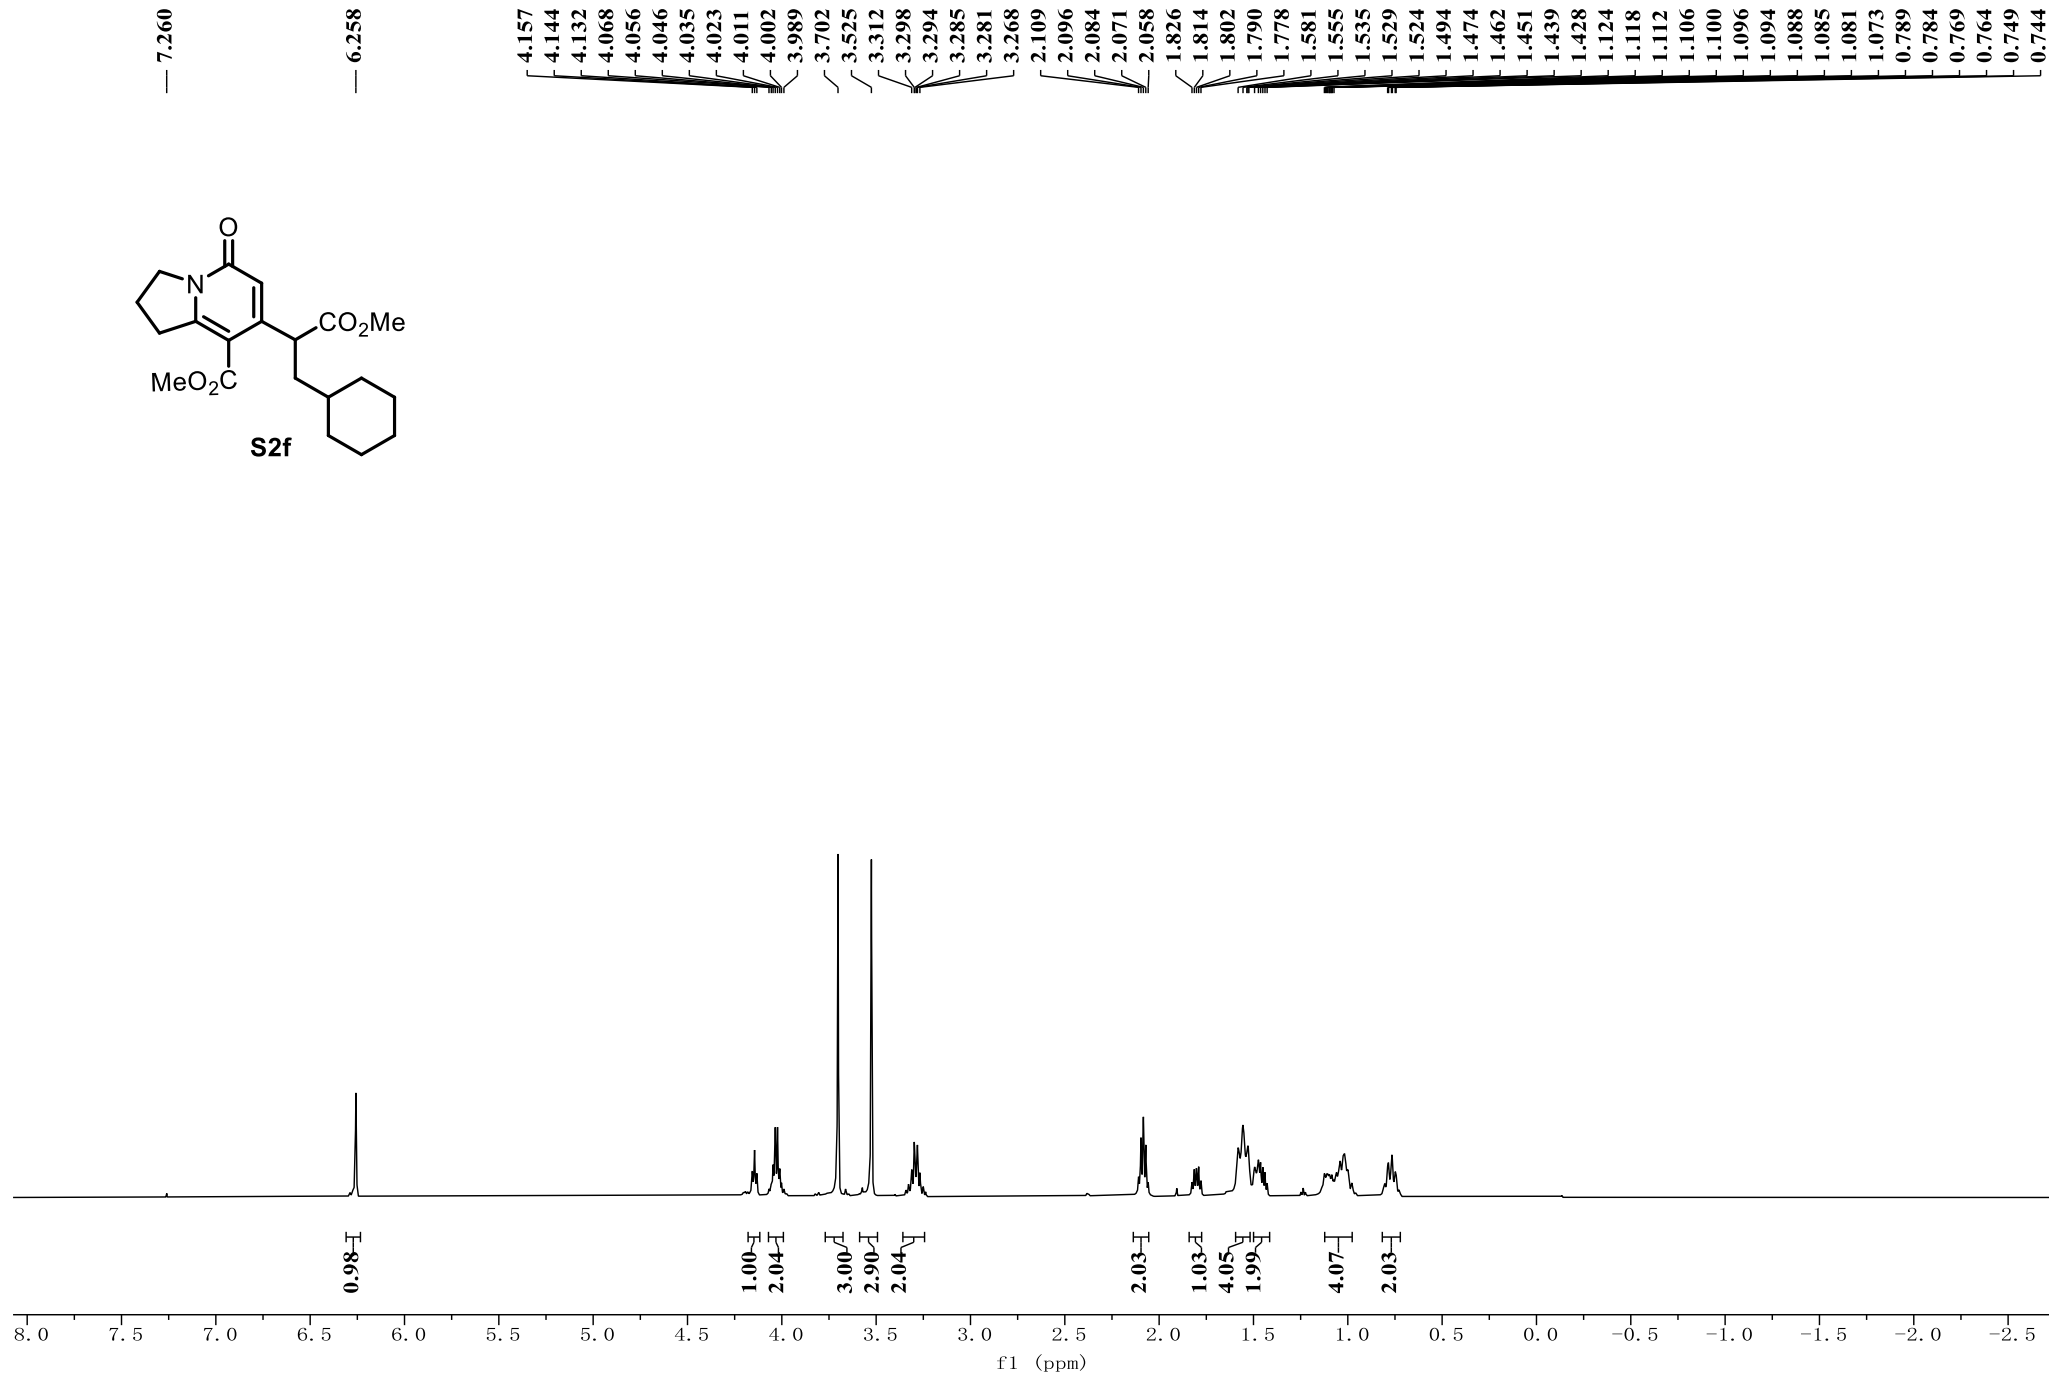

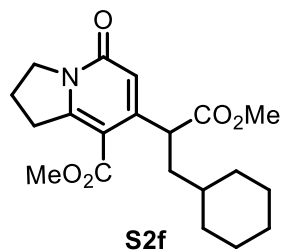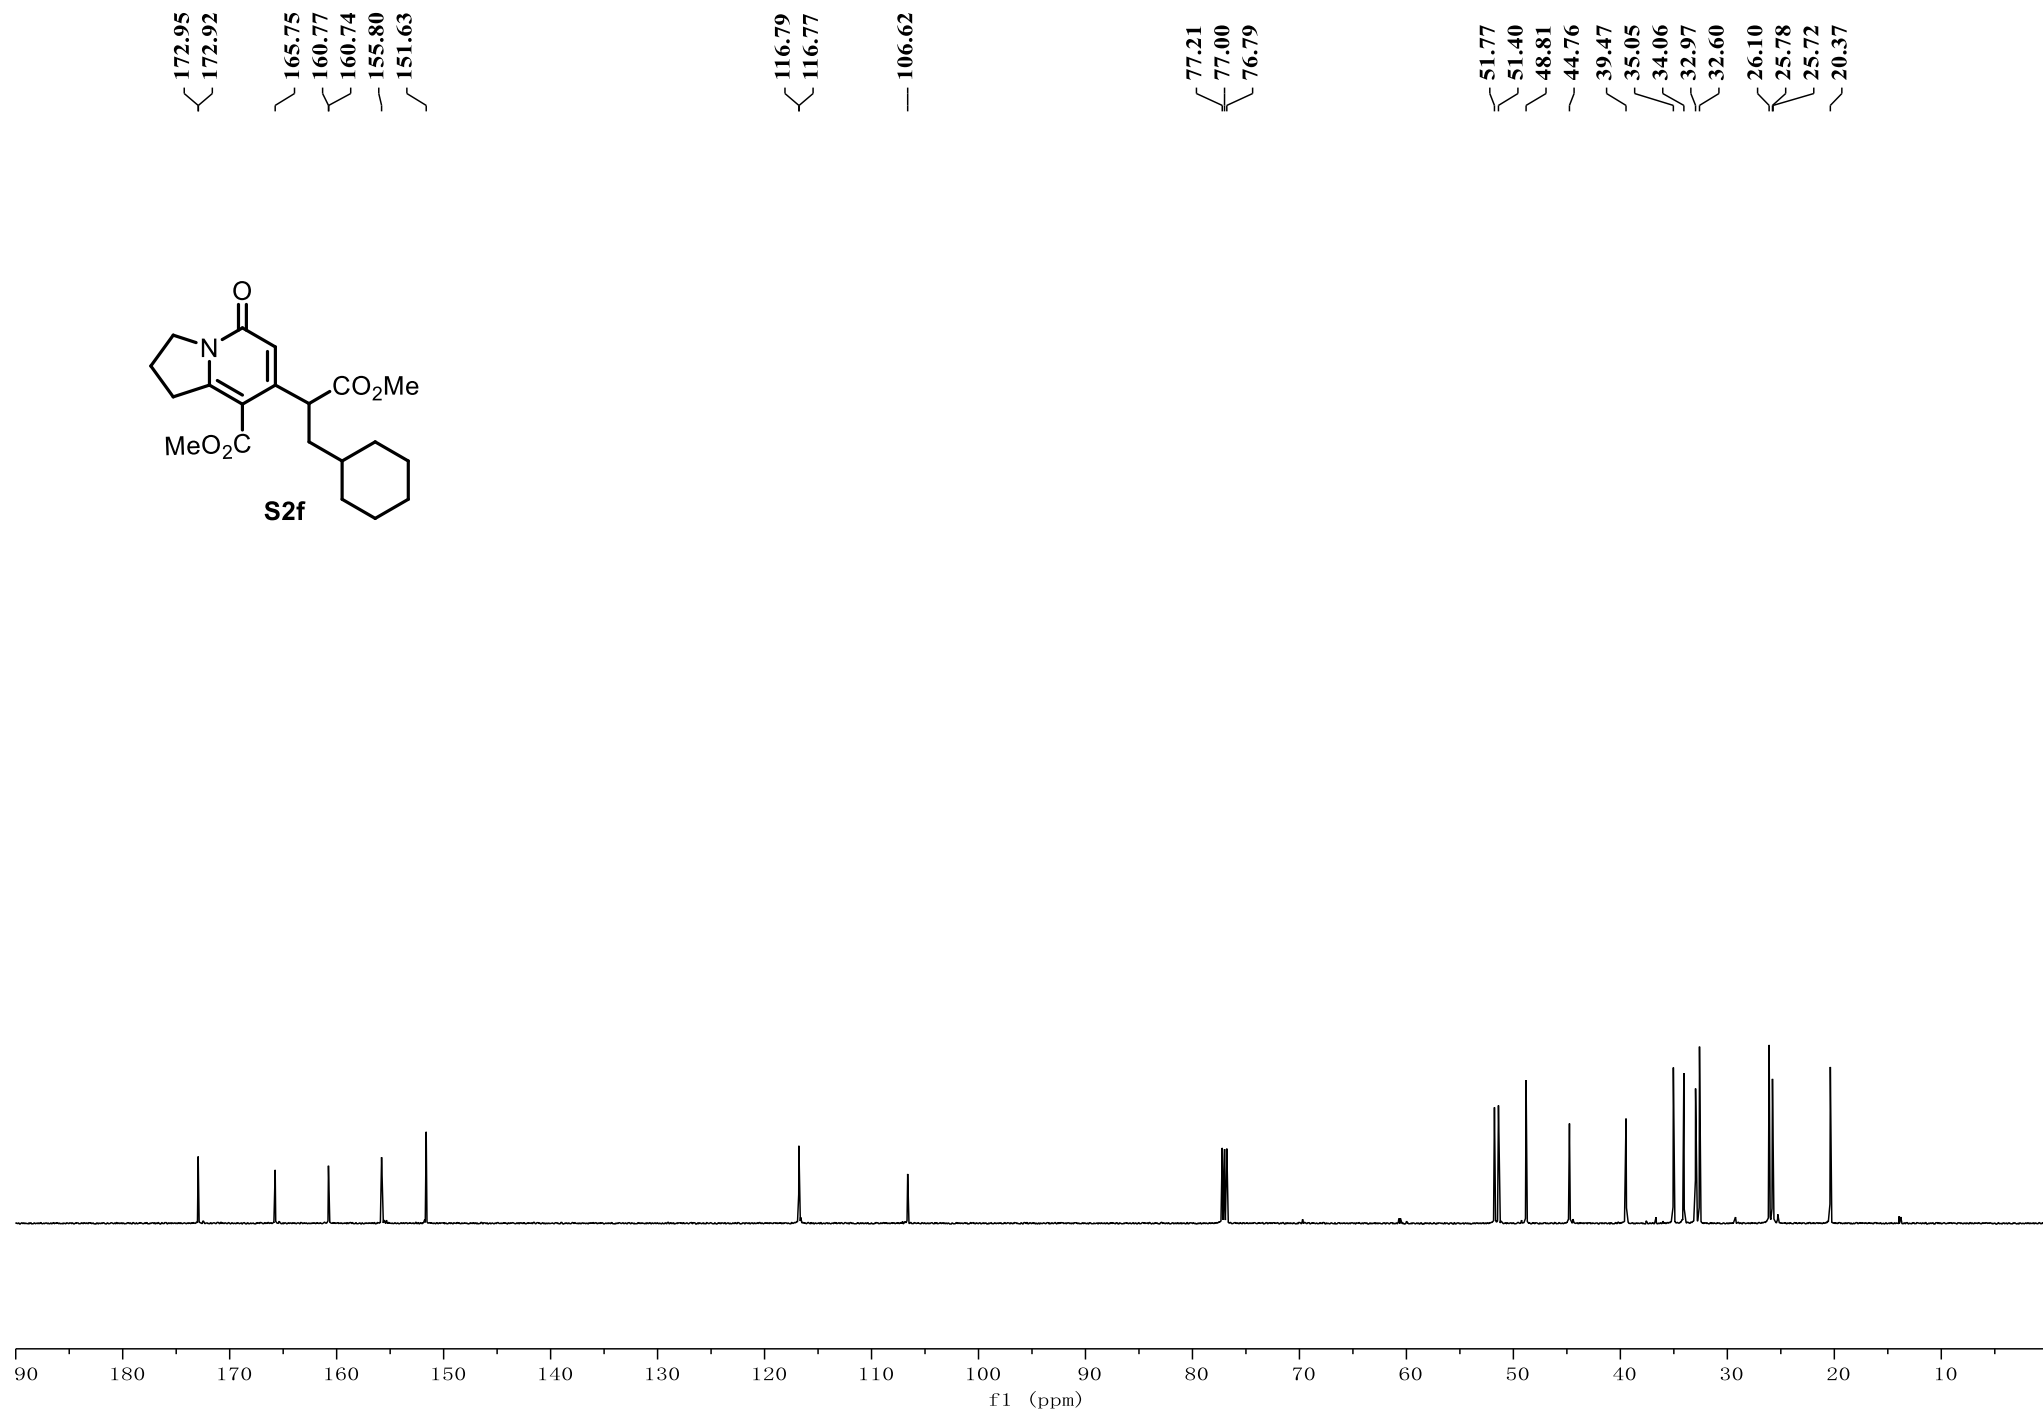

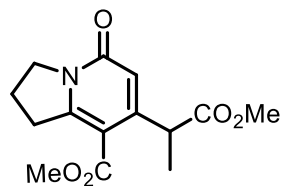

**S2g**

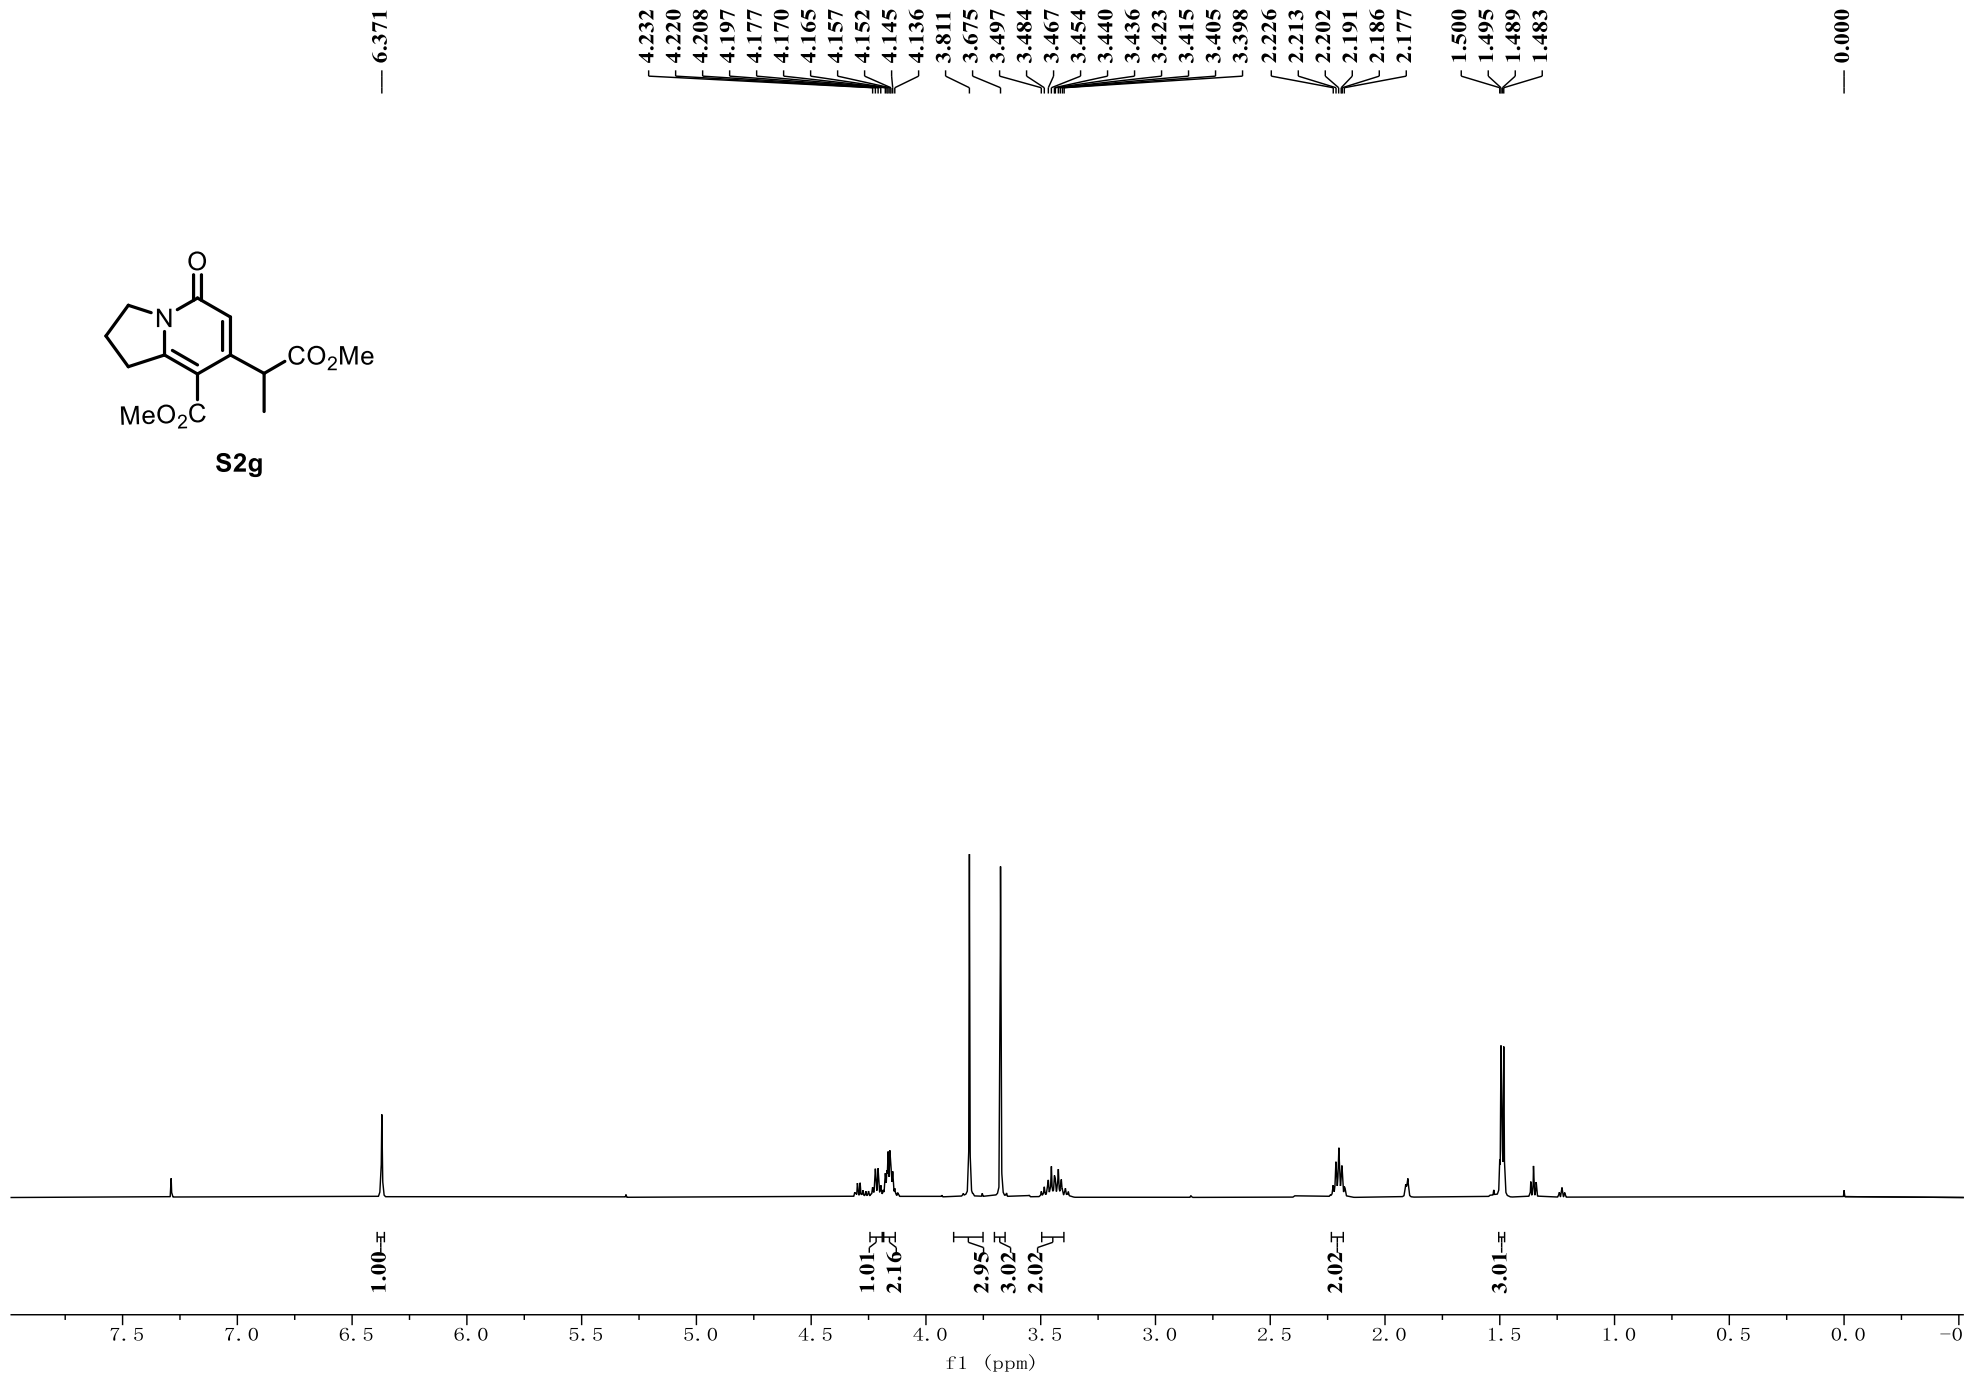

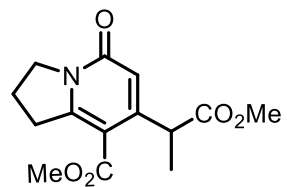

**S2g**

— 173.63  
 ~ 166.00  
 ~ 161.22  
 ~ 156.44  
 ~ 152.86

— 116.81  
 — 106.56

77.21  
 77.00  
 76.79

— 61.59

~ 52.85  
 ~ 51.57  
 ~ 49.00

— 42.94

— 35.24

~ 20.64  
 ~ 17.08  
 ~ 14.53

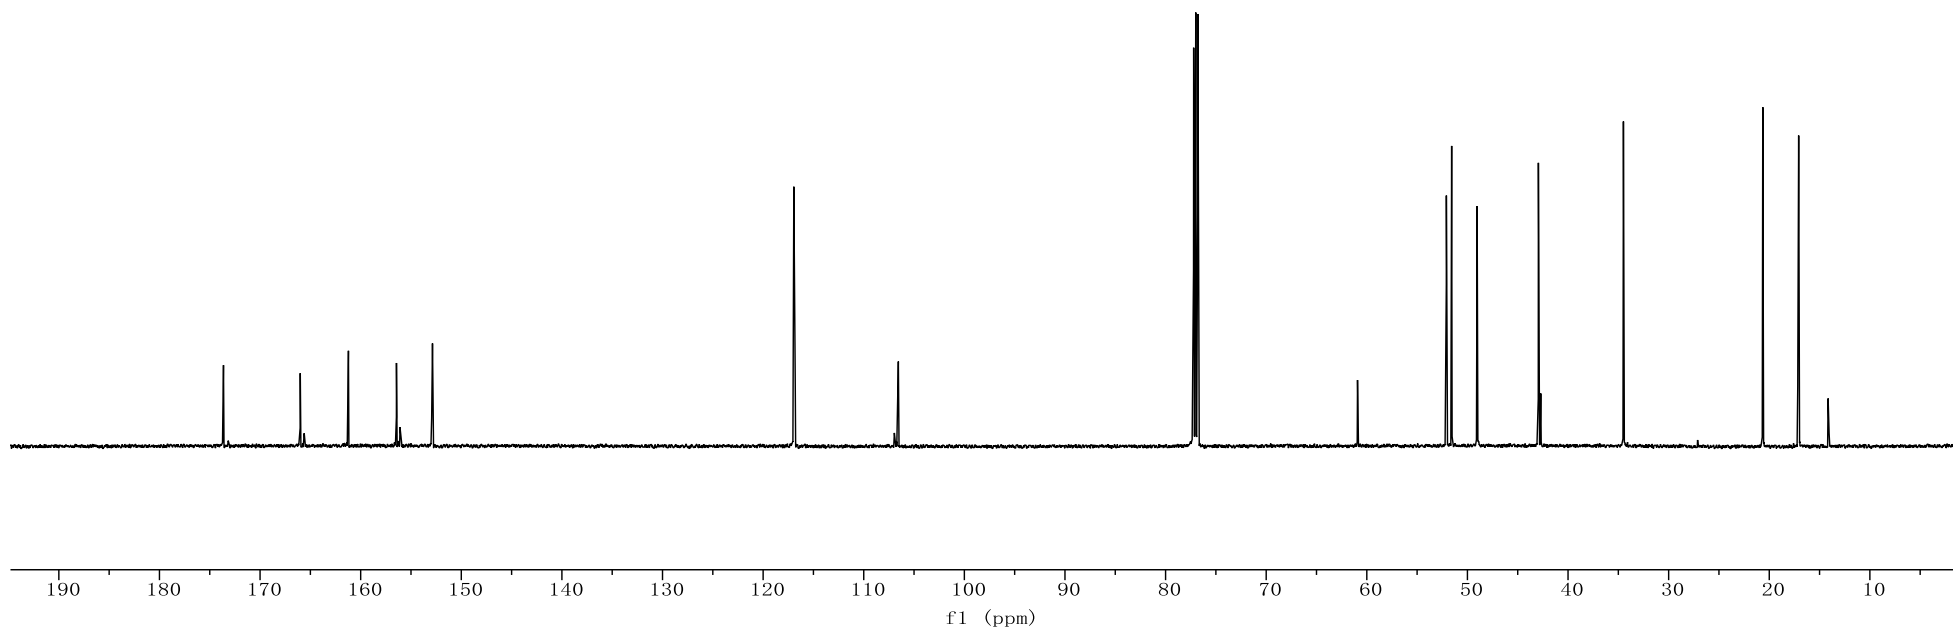

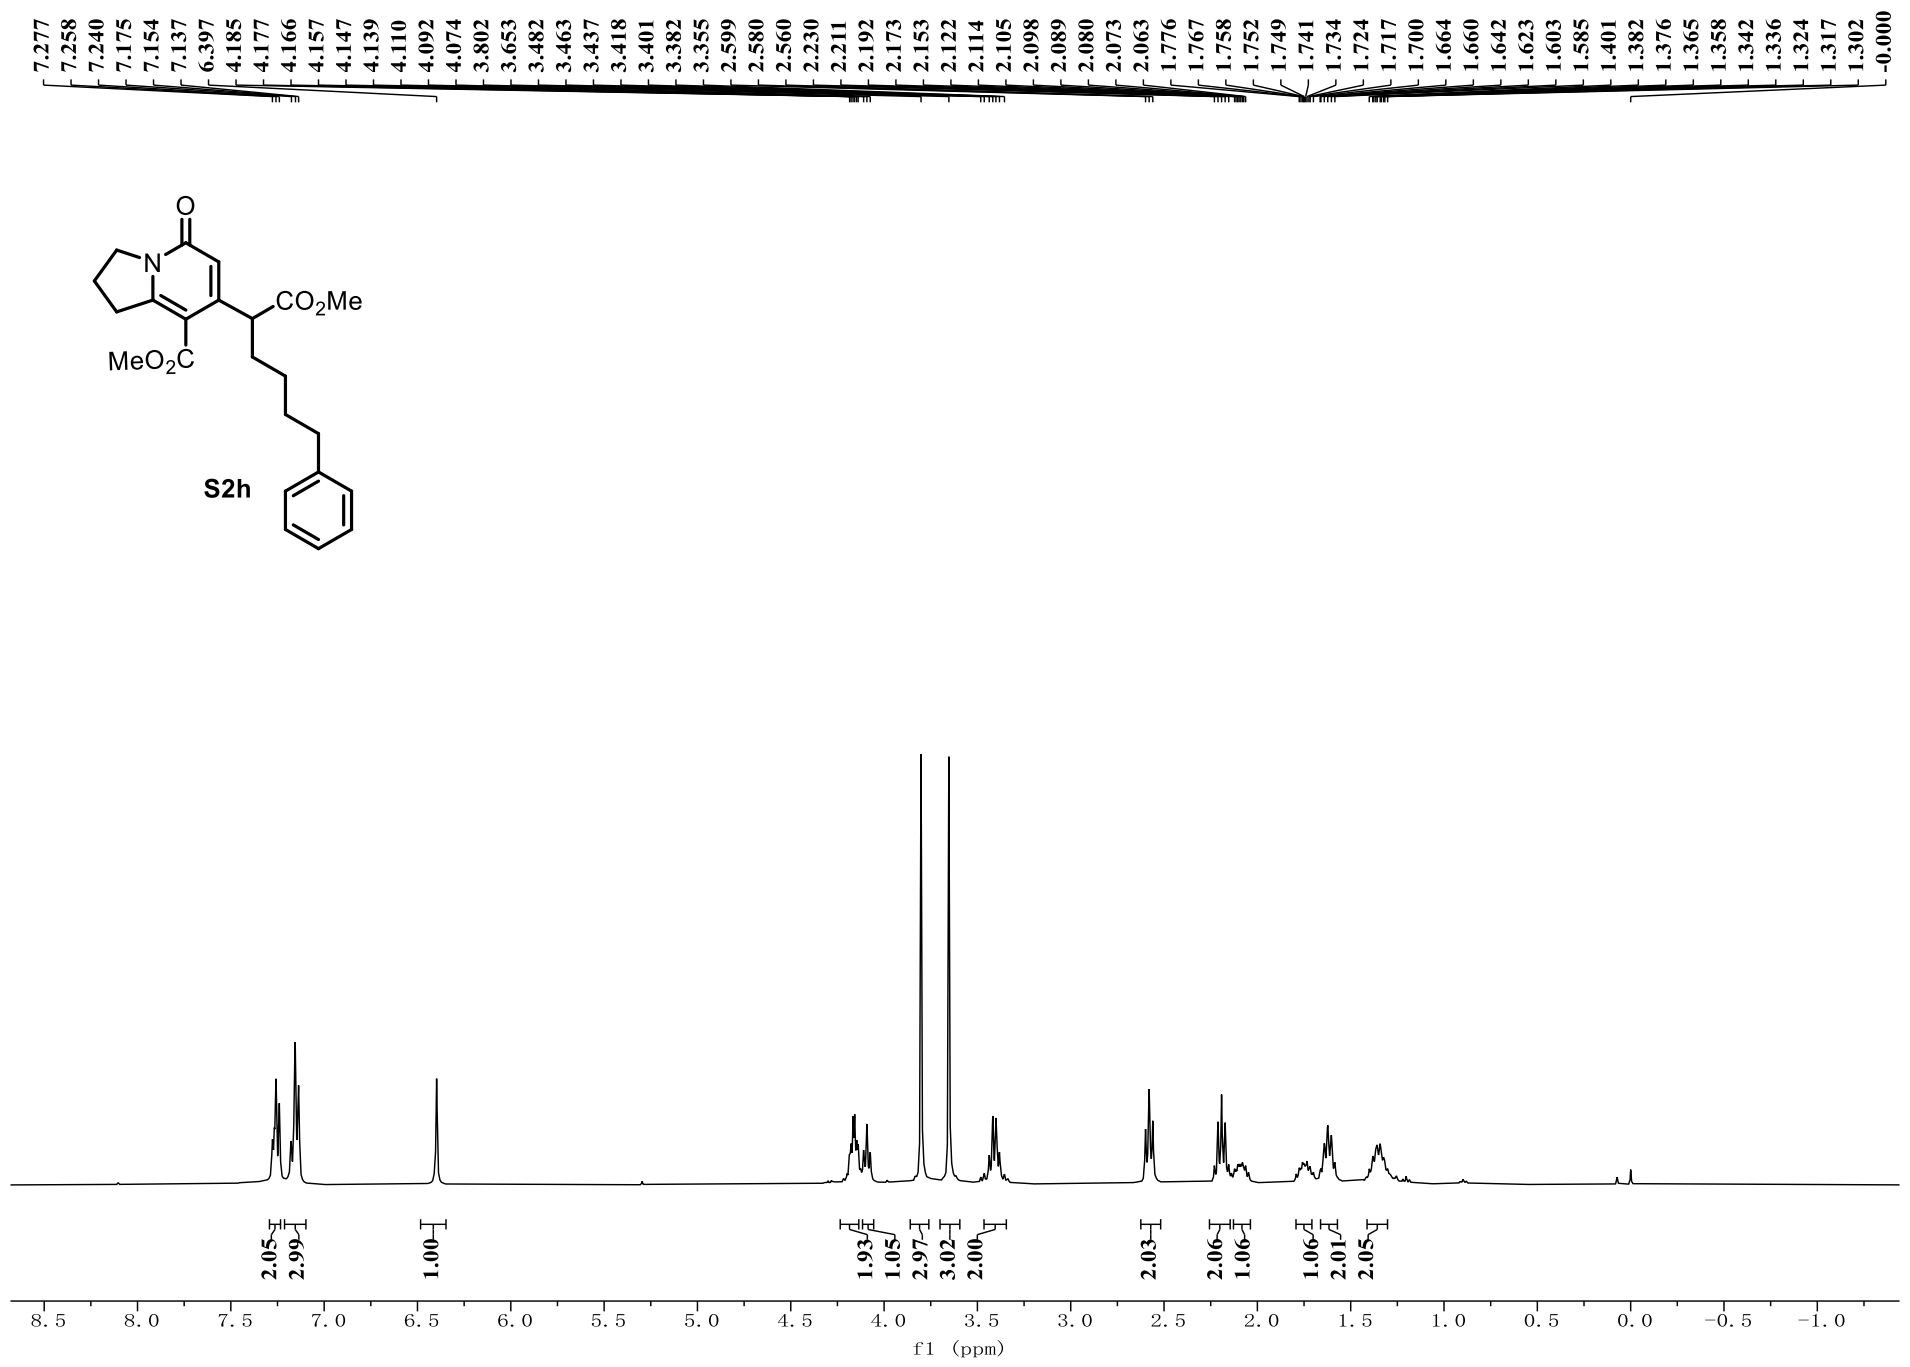

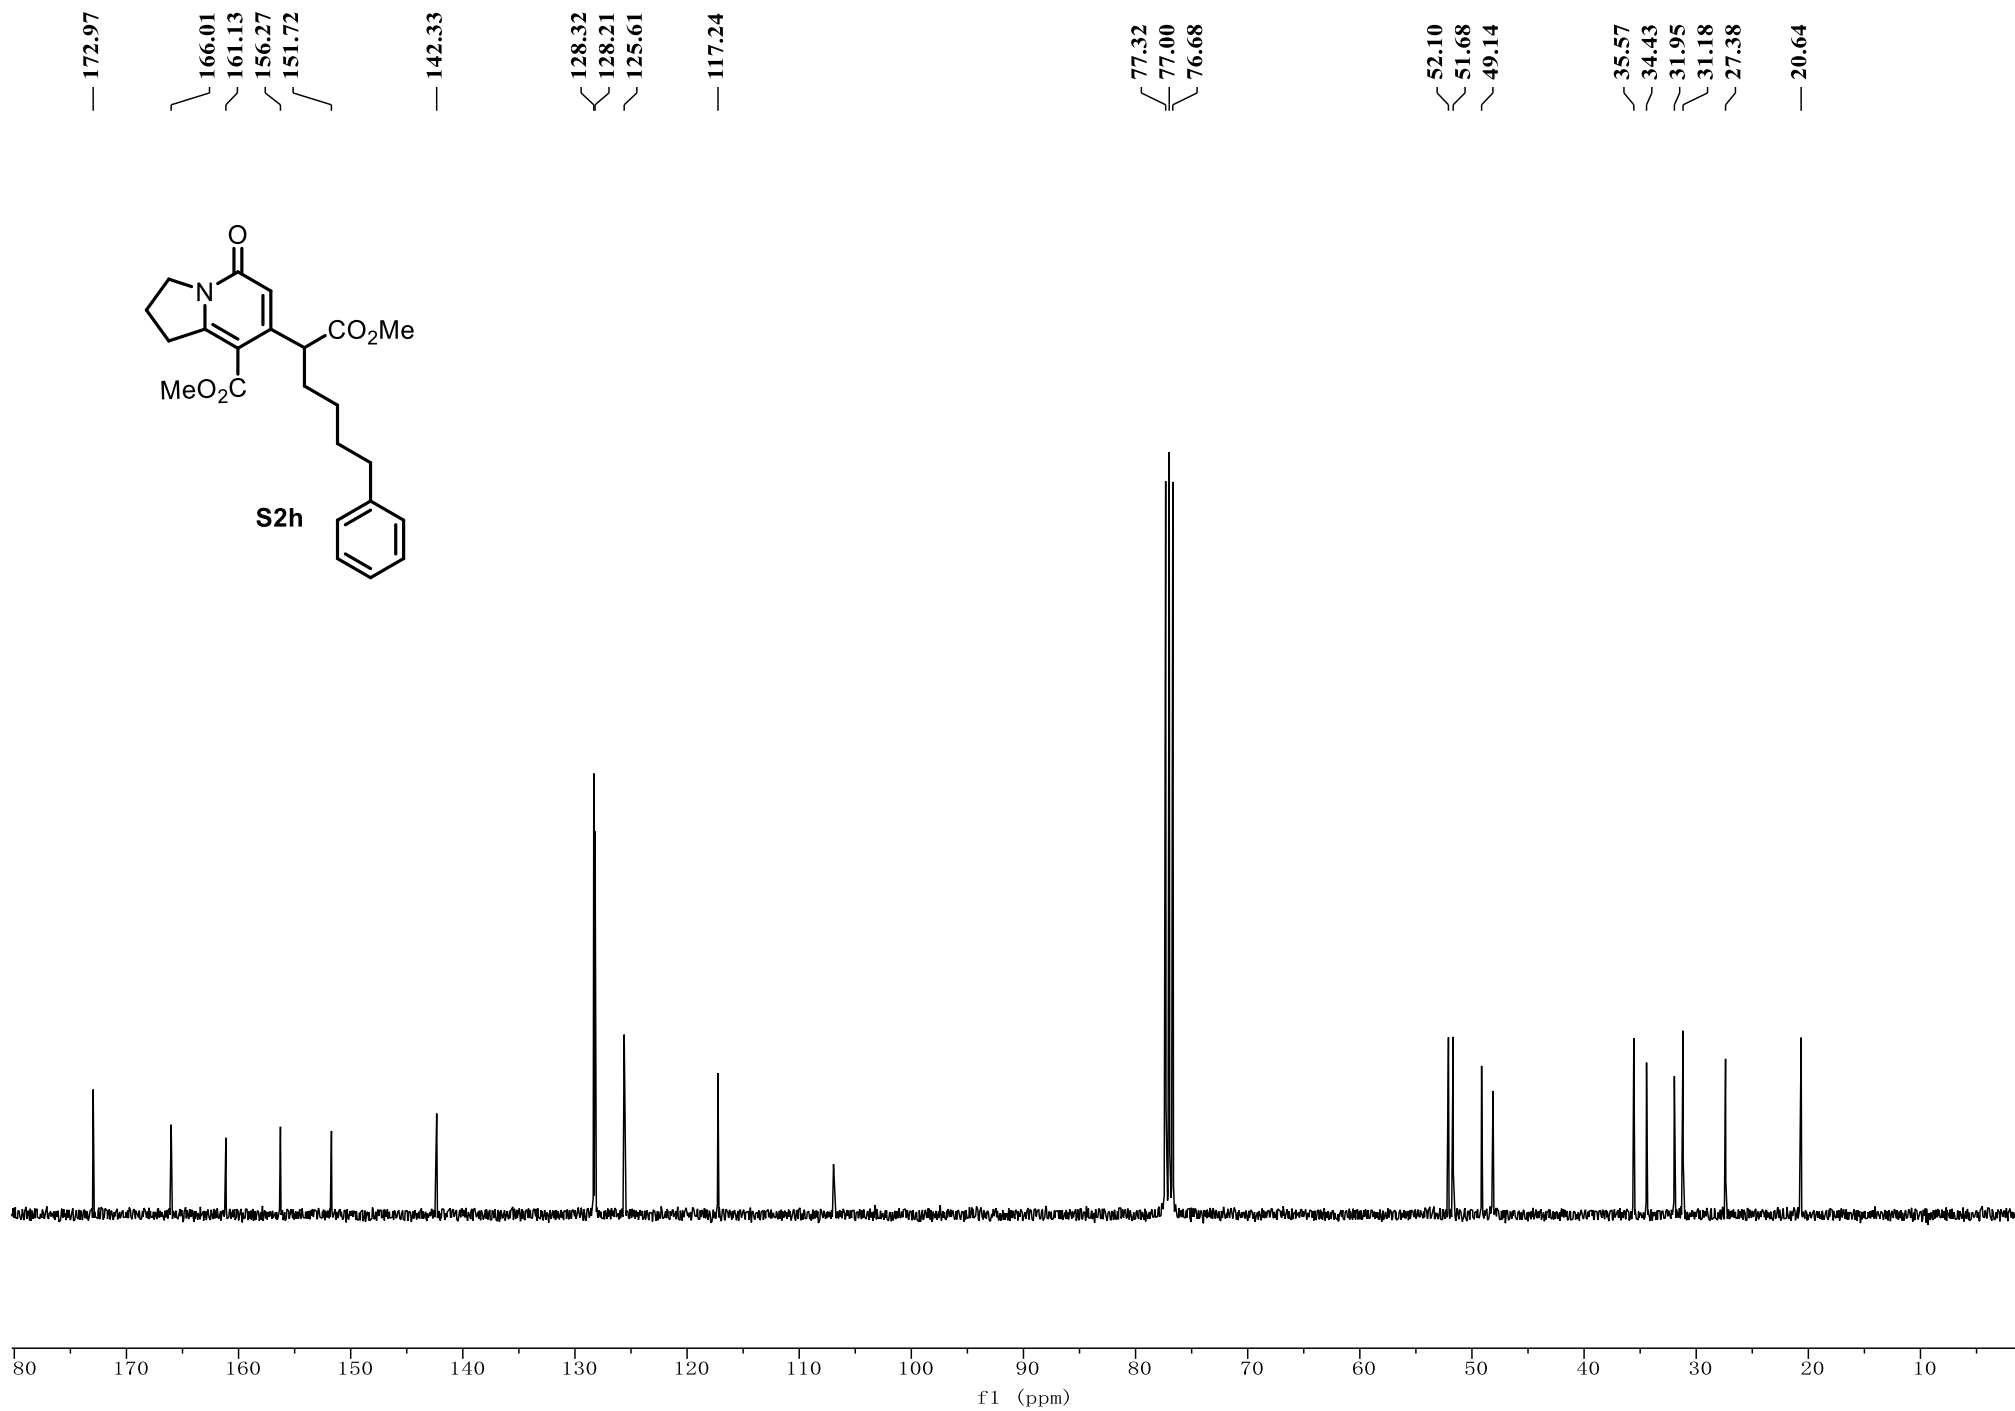

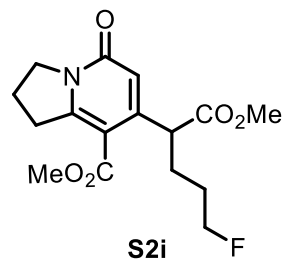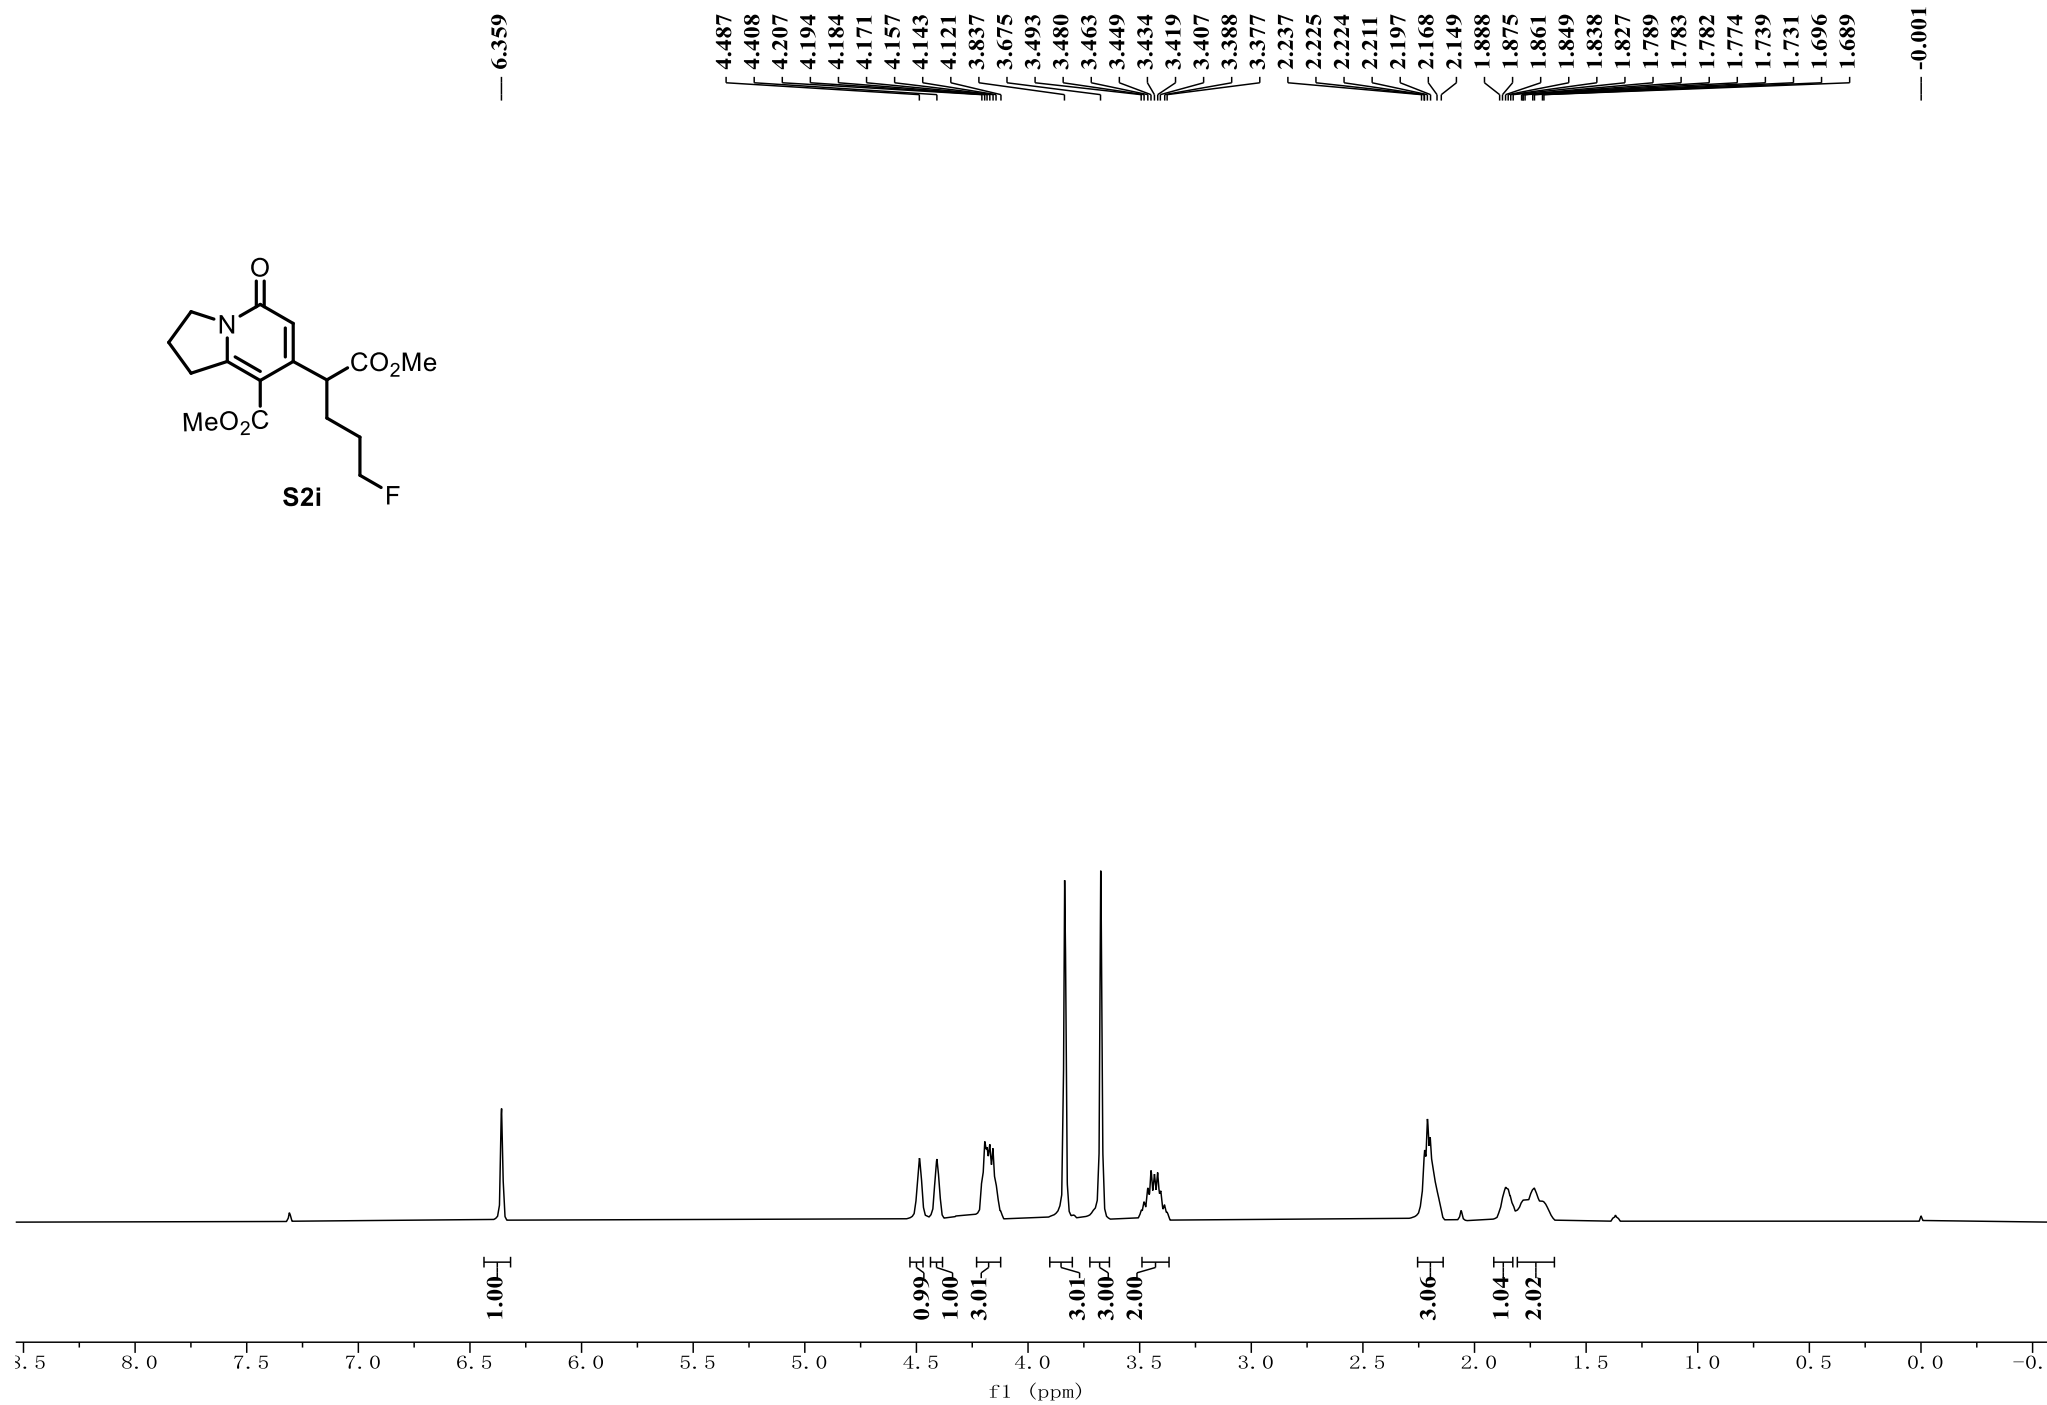

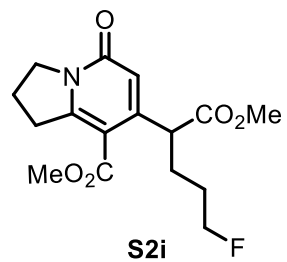

172.59  
 165.87  
 160.91  
 156.54  
 151.36

117.09

106.55

83.95  
 82.86  
 77.21  
 77.00  
 76.79

52.12  
 51.66  
 49.07  
 47.45

34.49  
 28.52  
 28.39  
 28.00  
 27.96  
 20.55

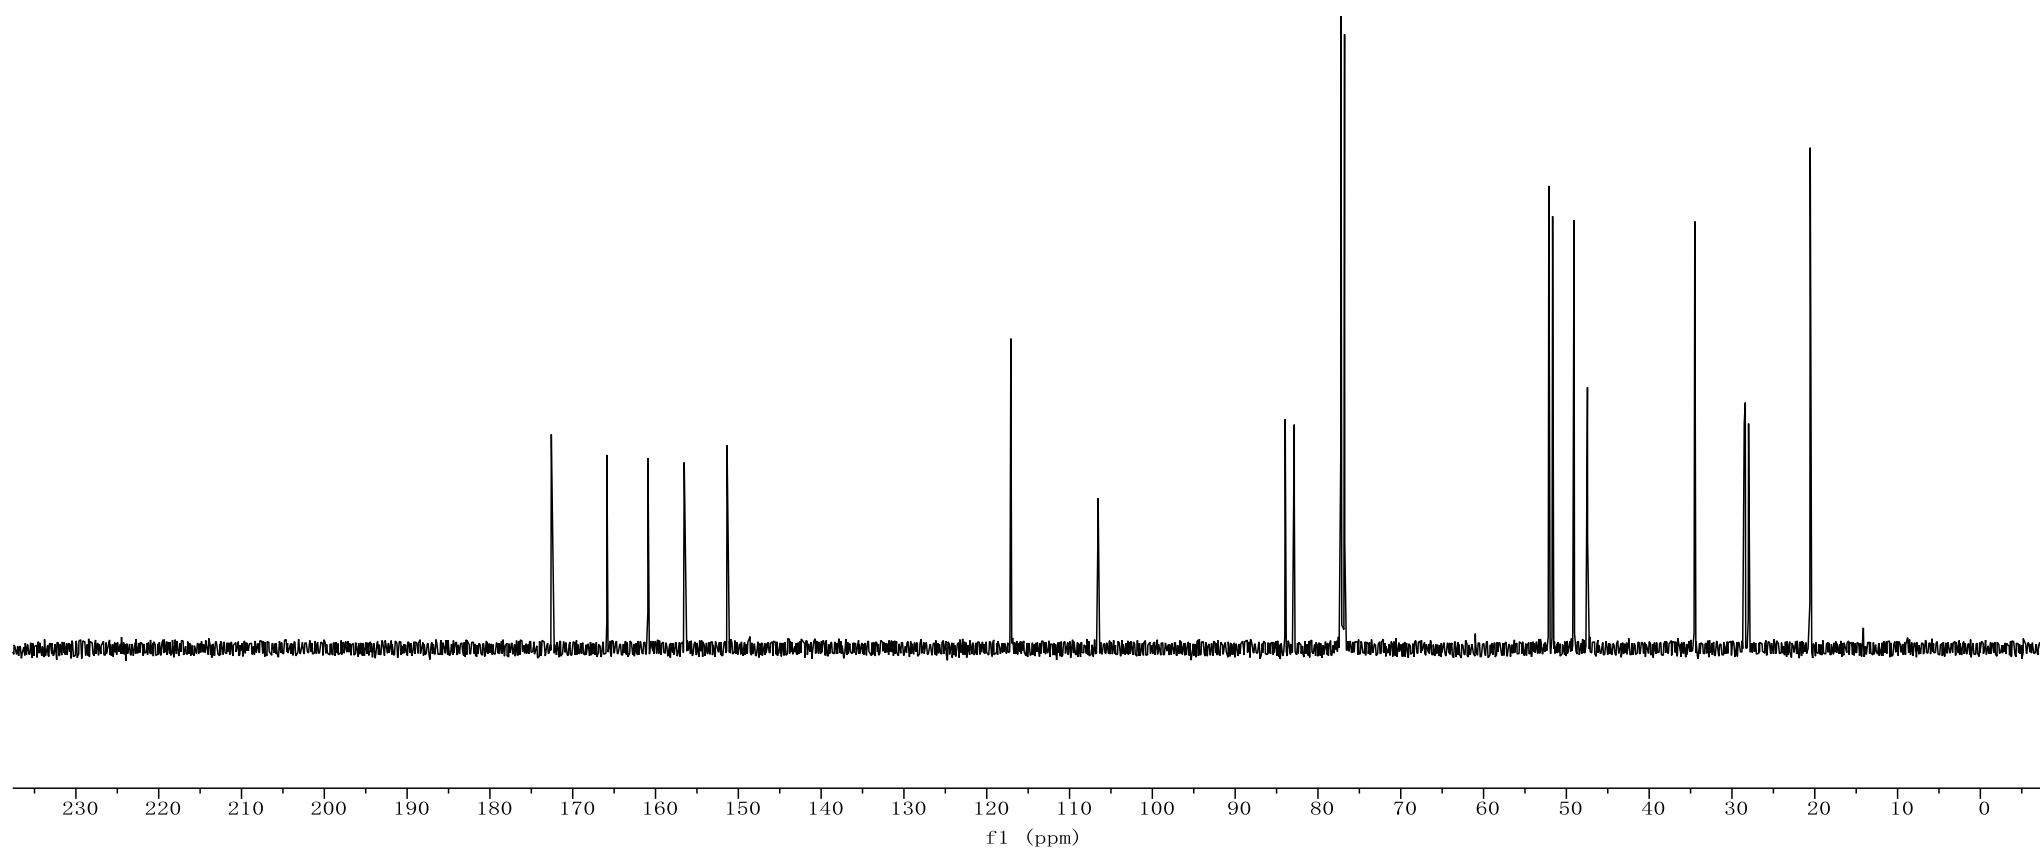

— 18.37

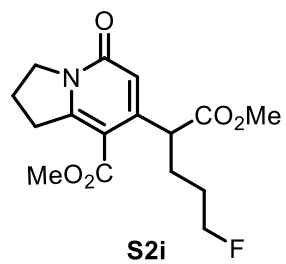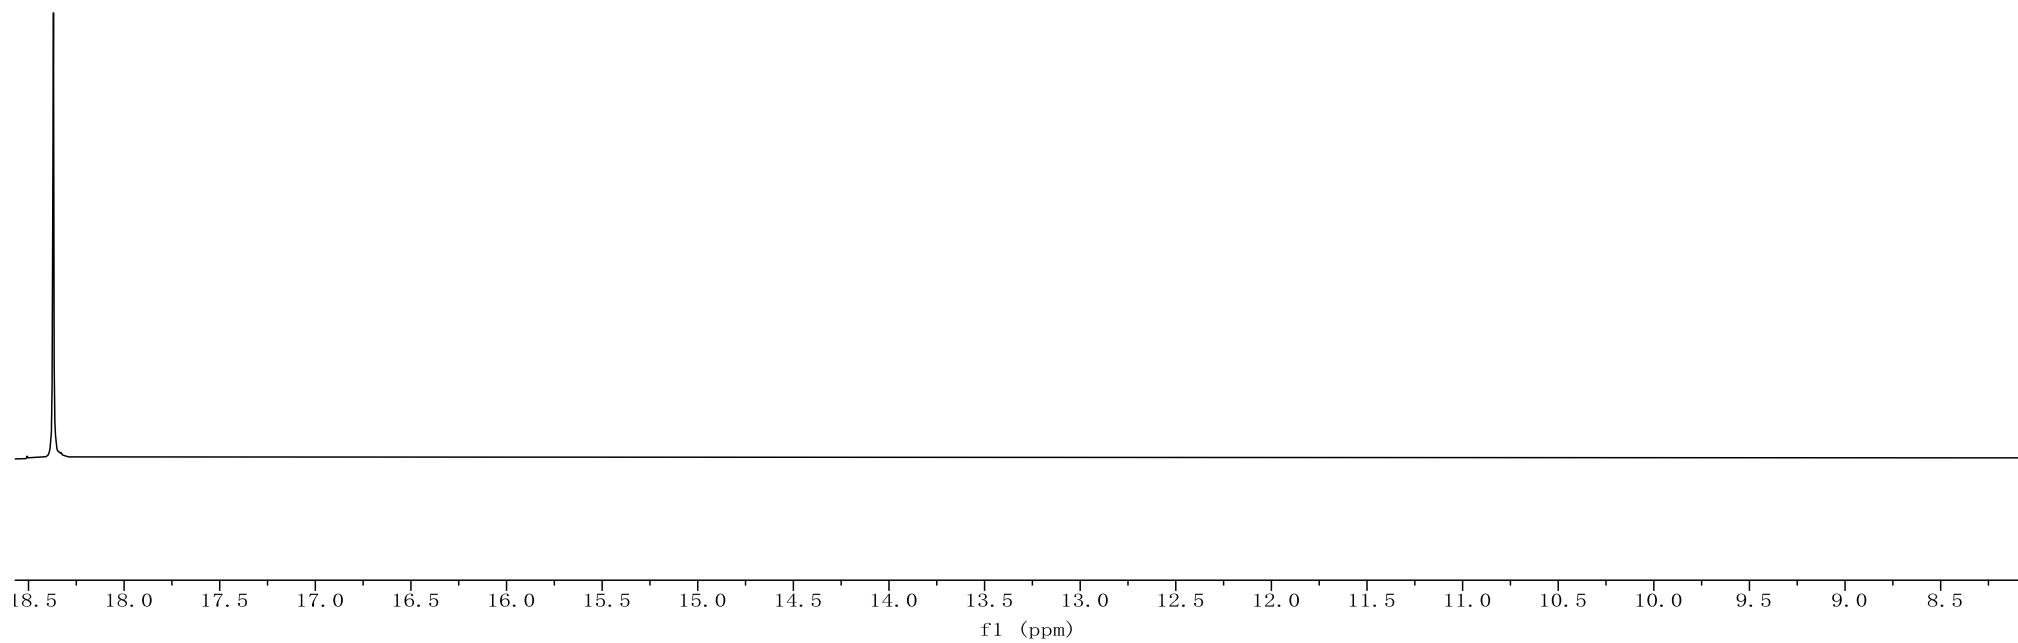

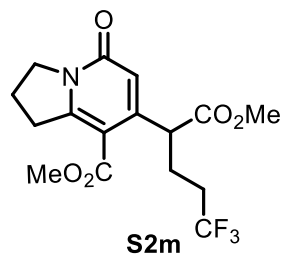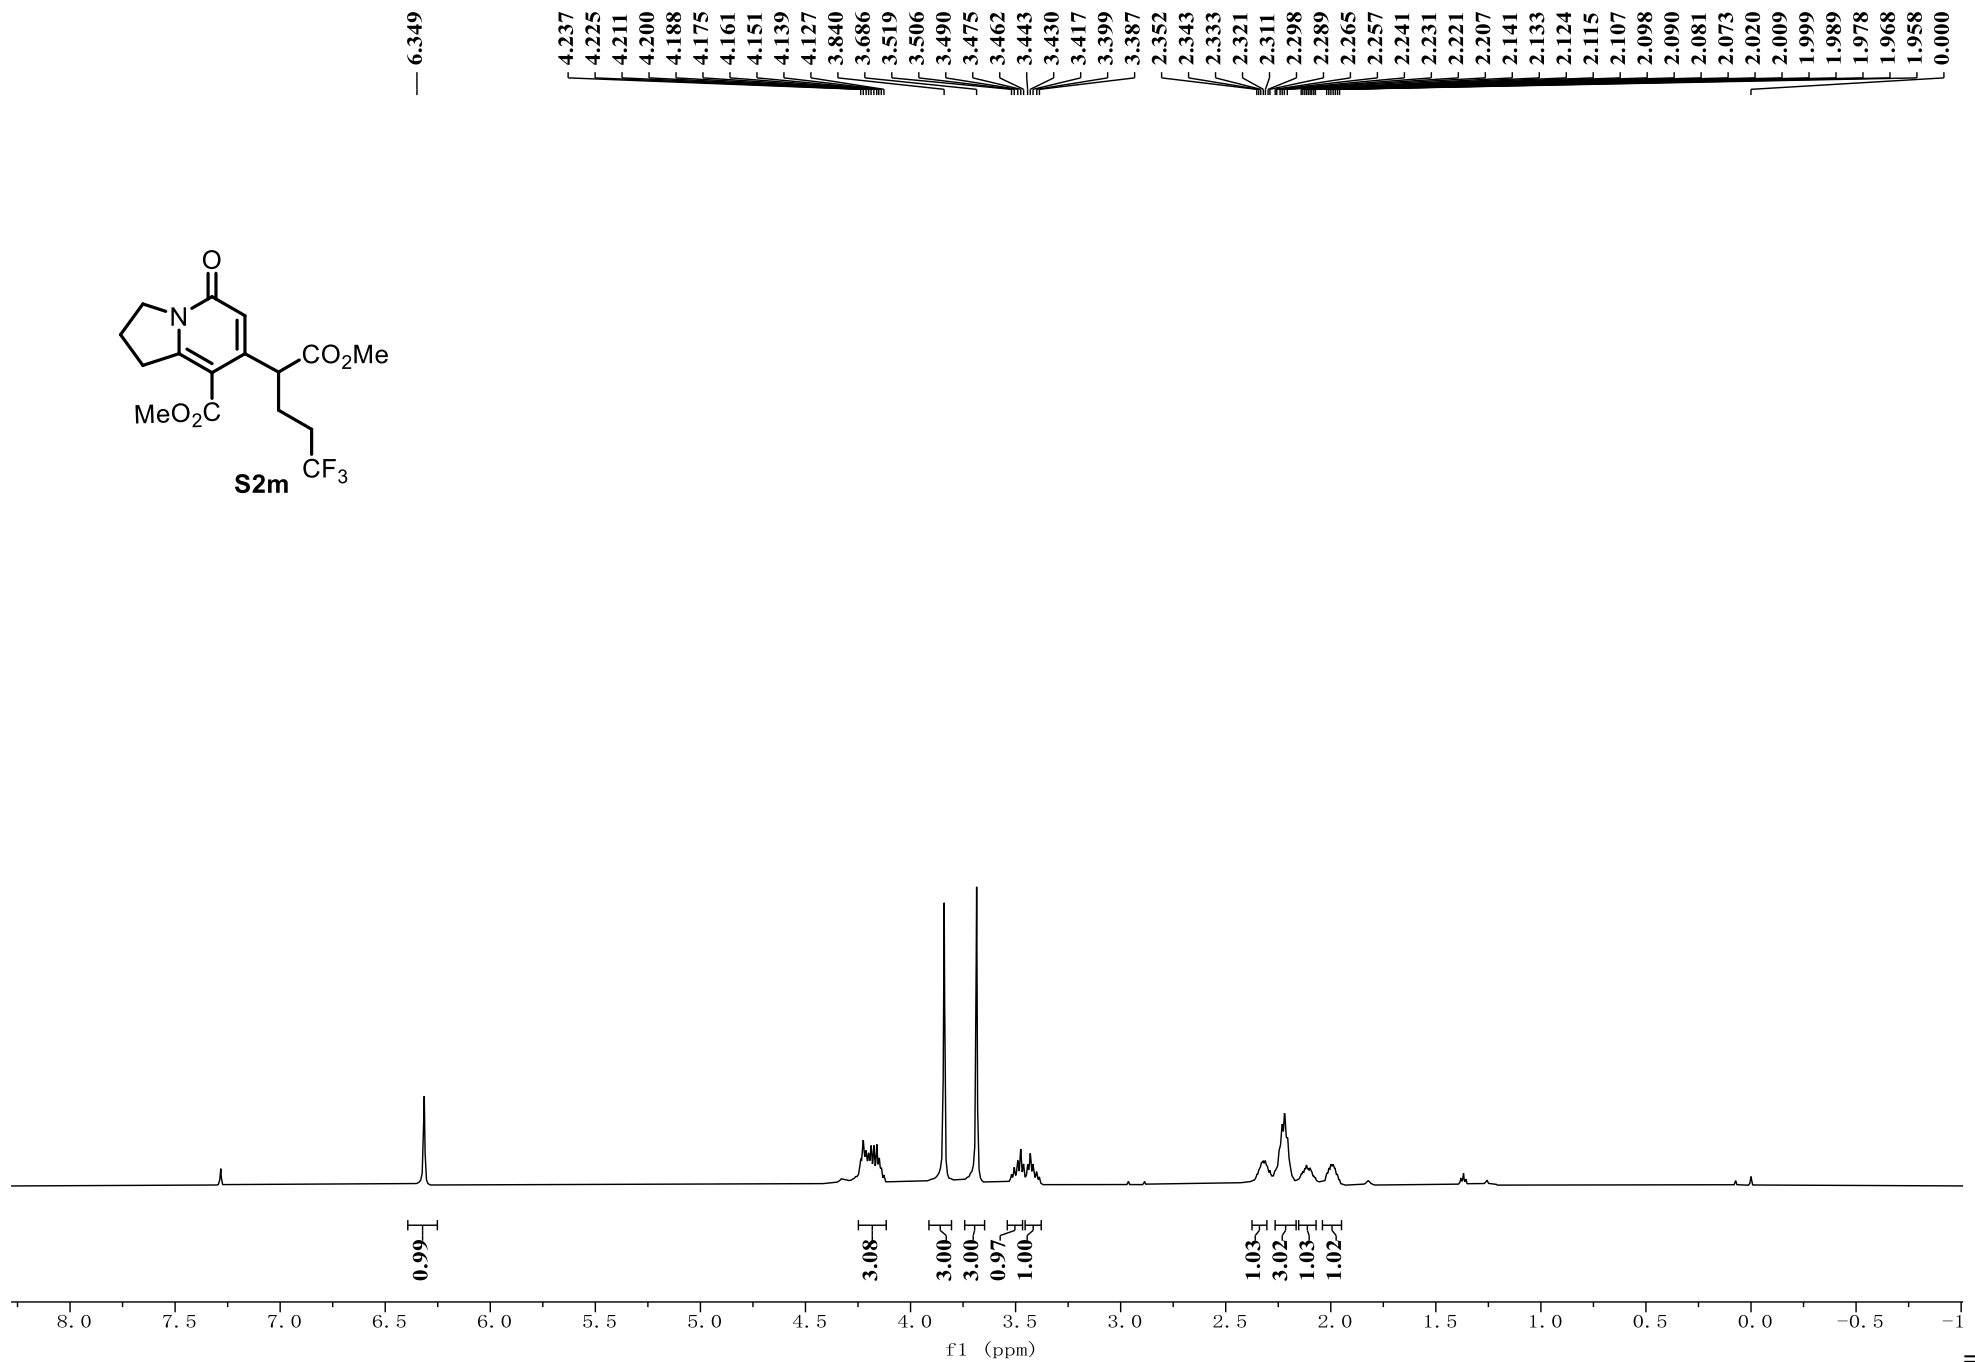

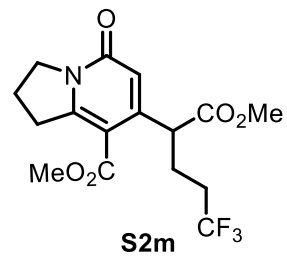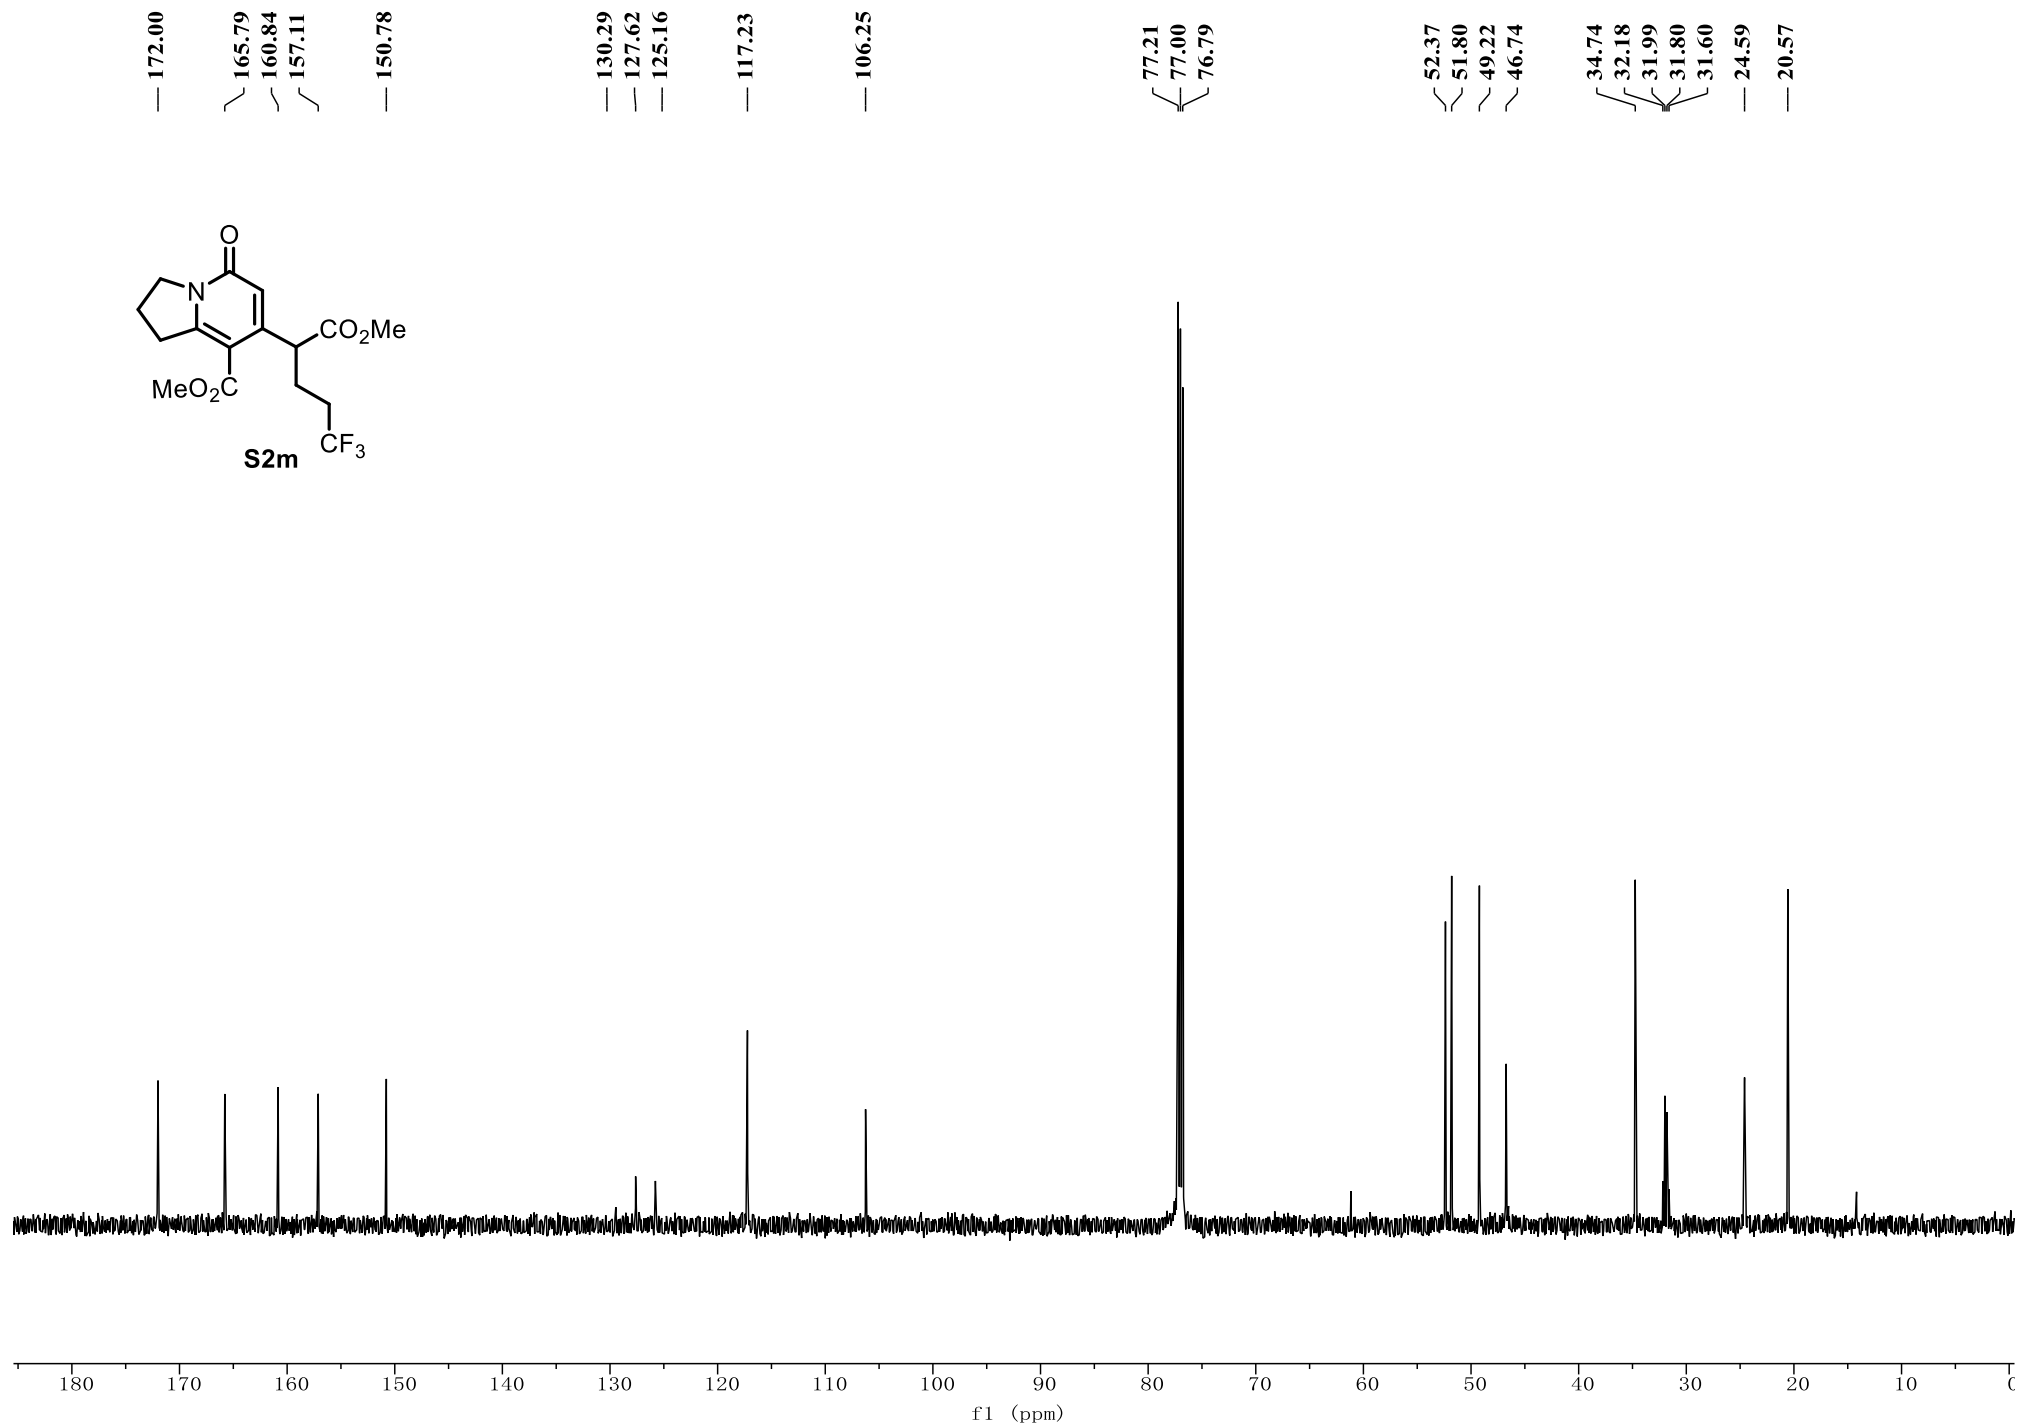

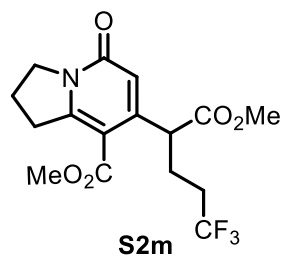

— -66.33

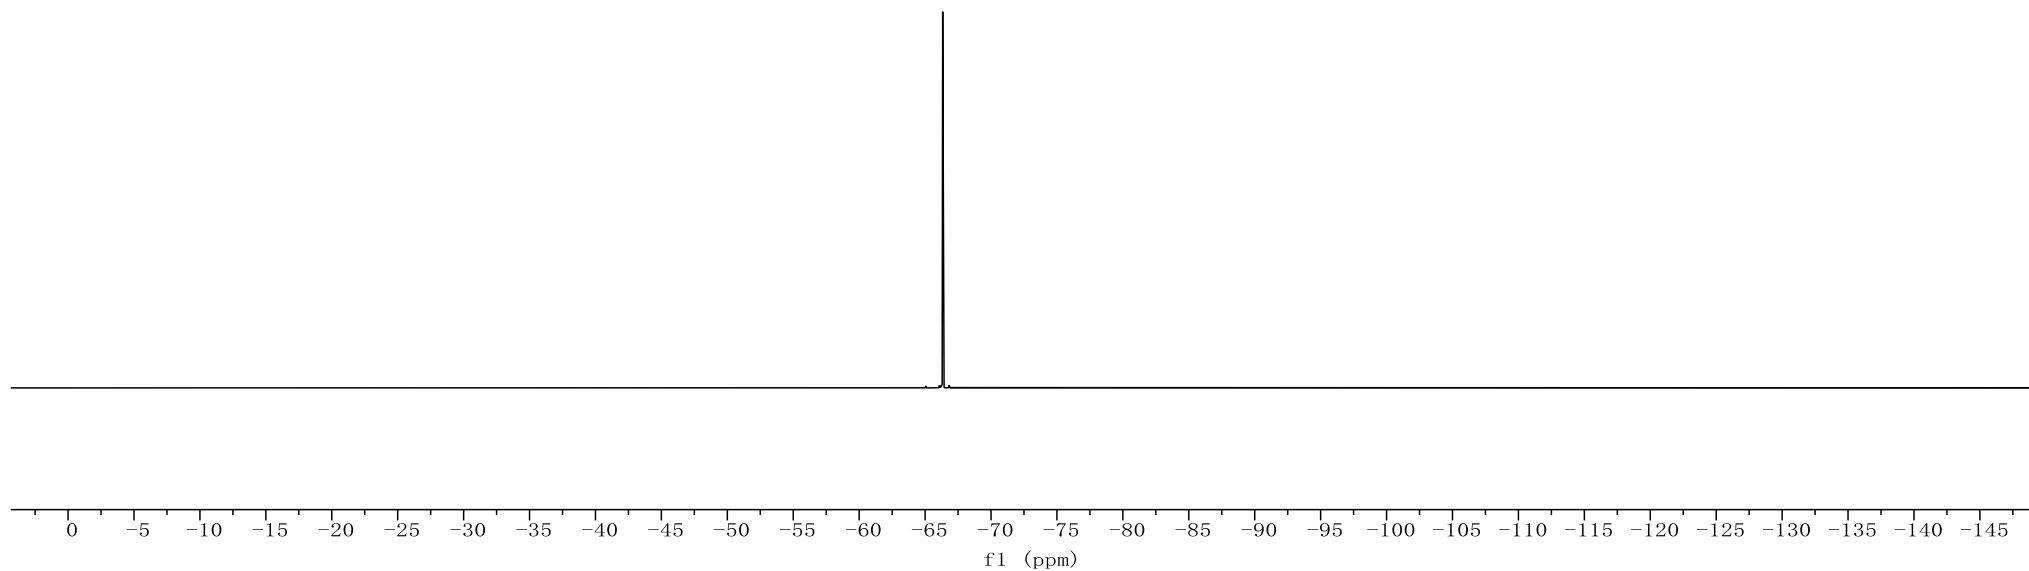

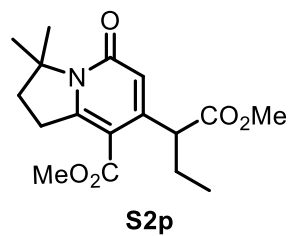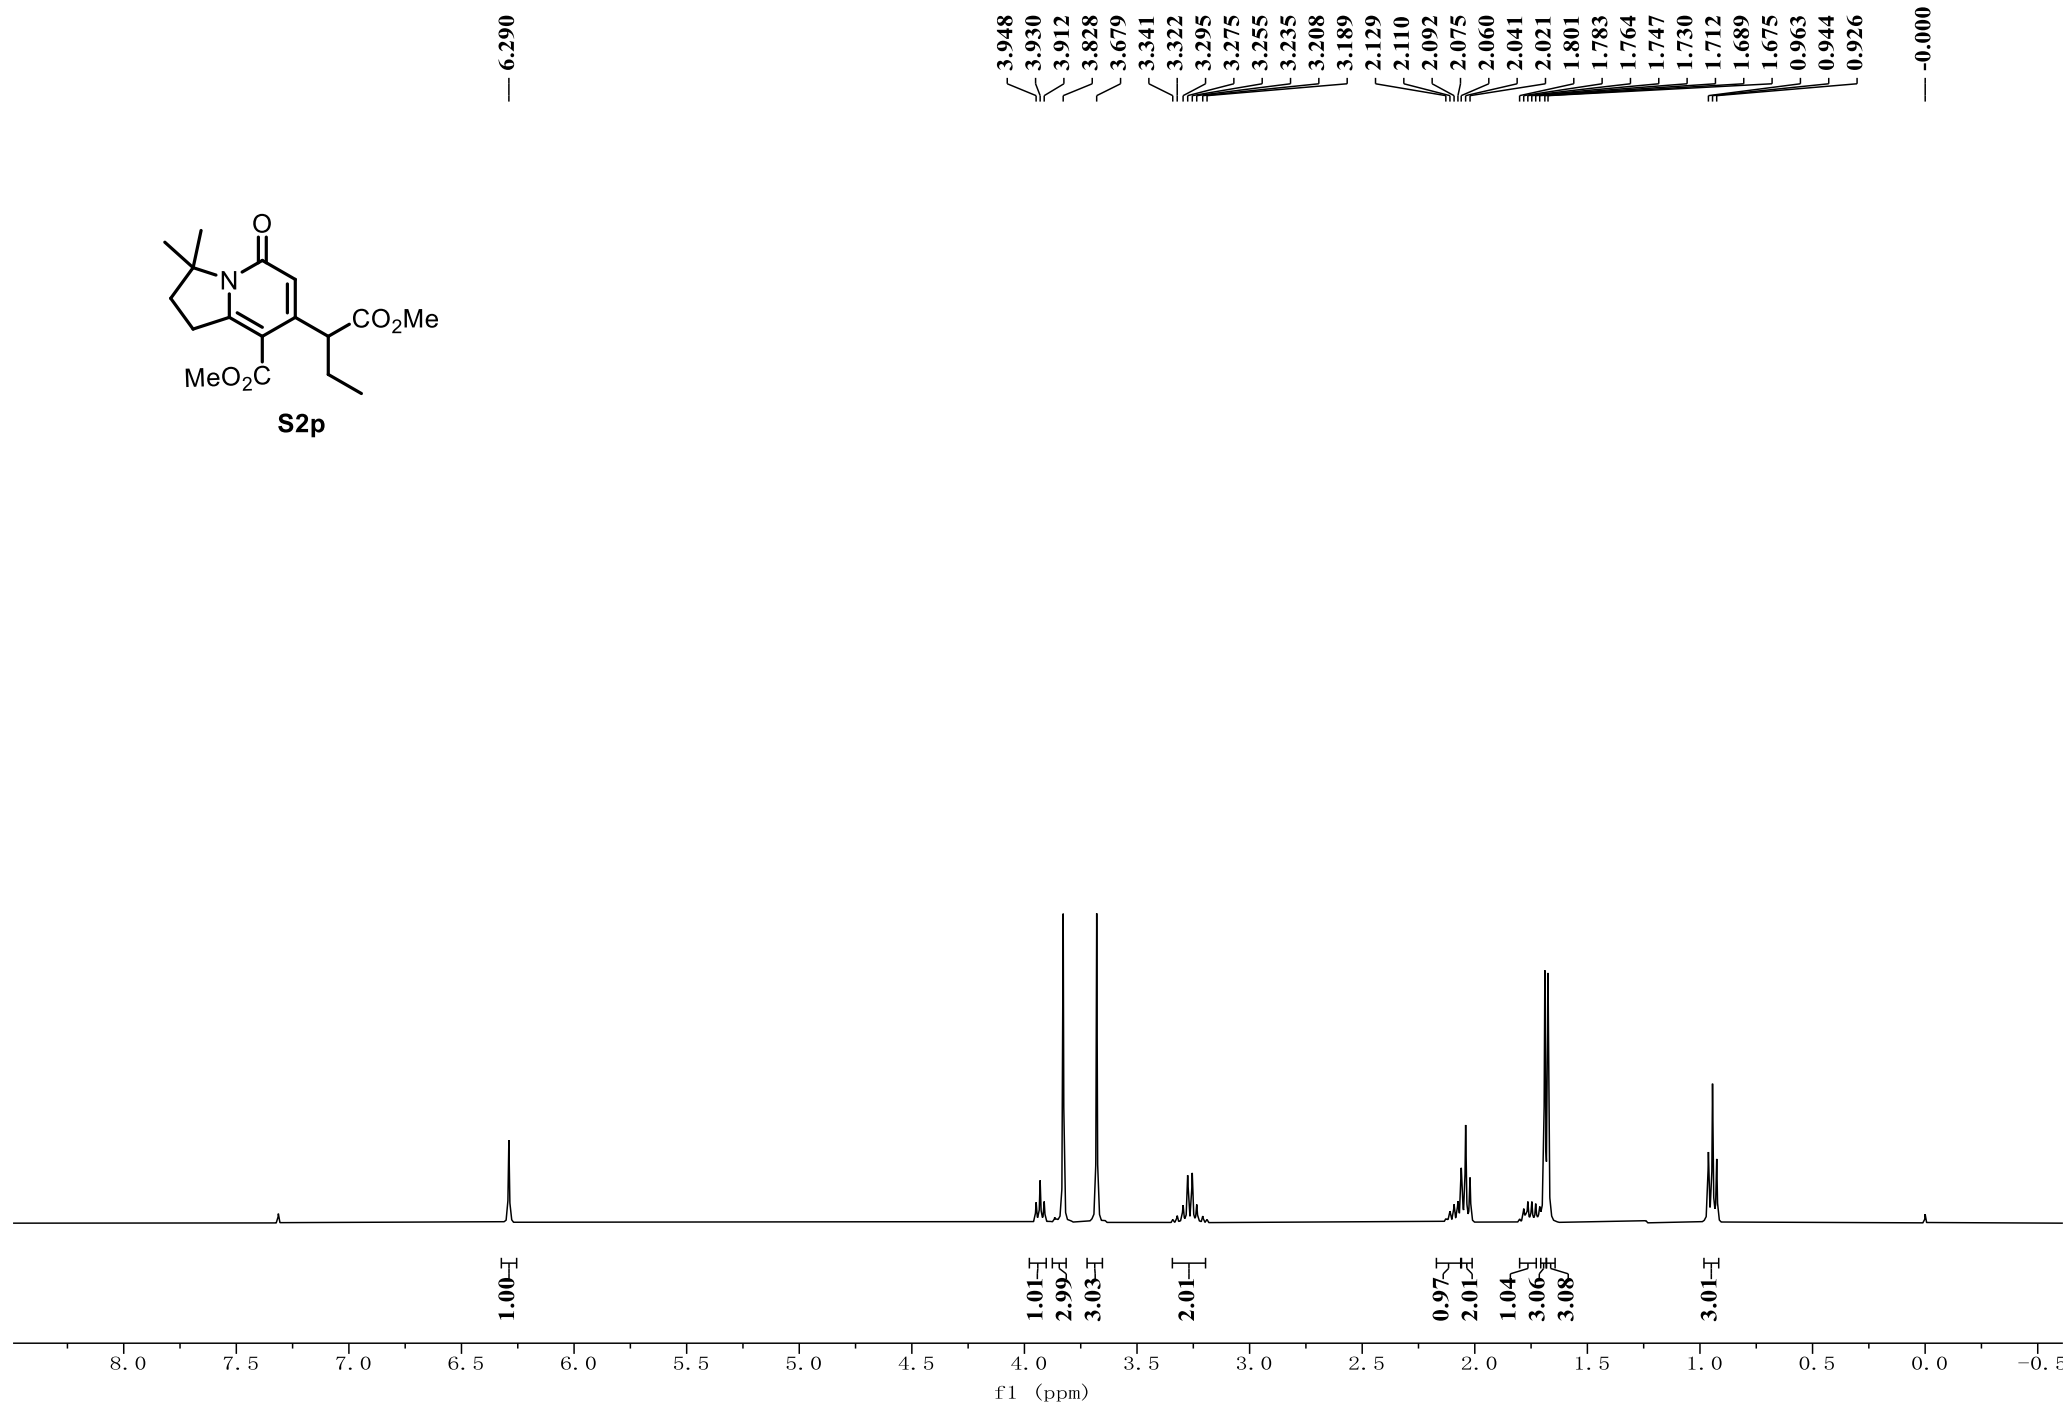

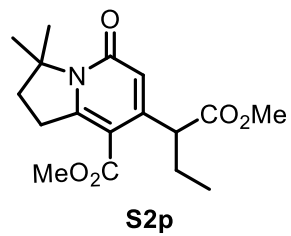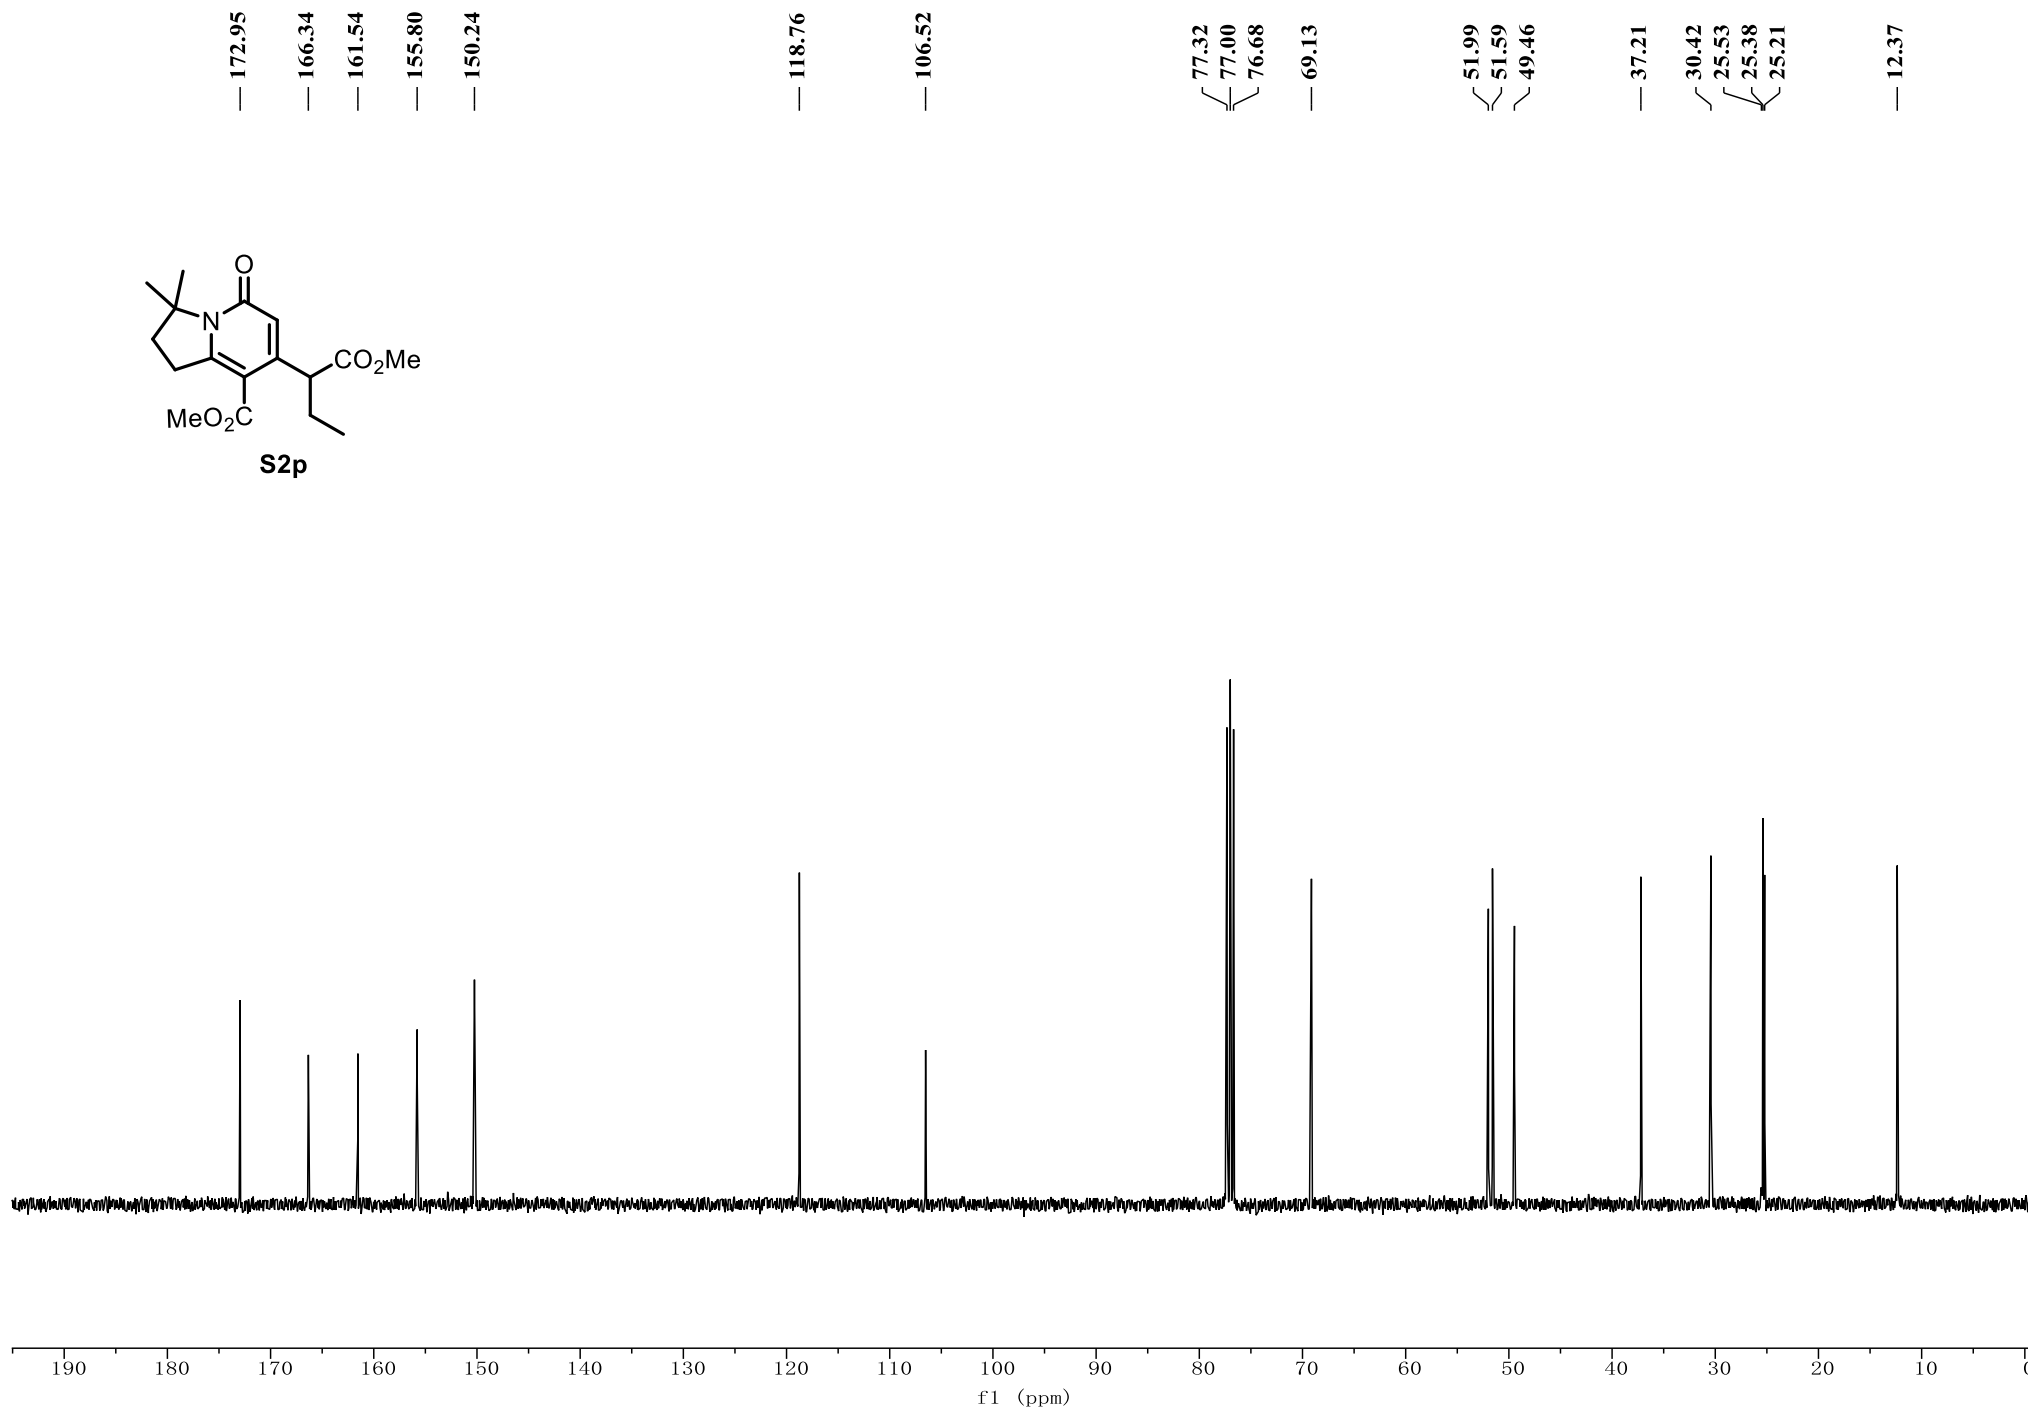

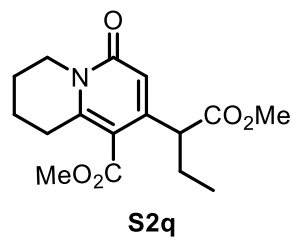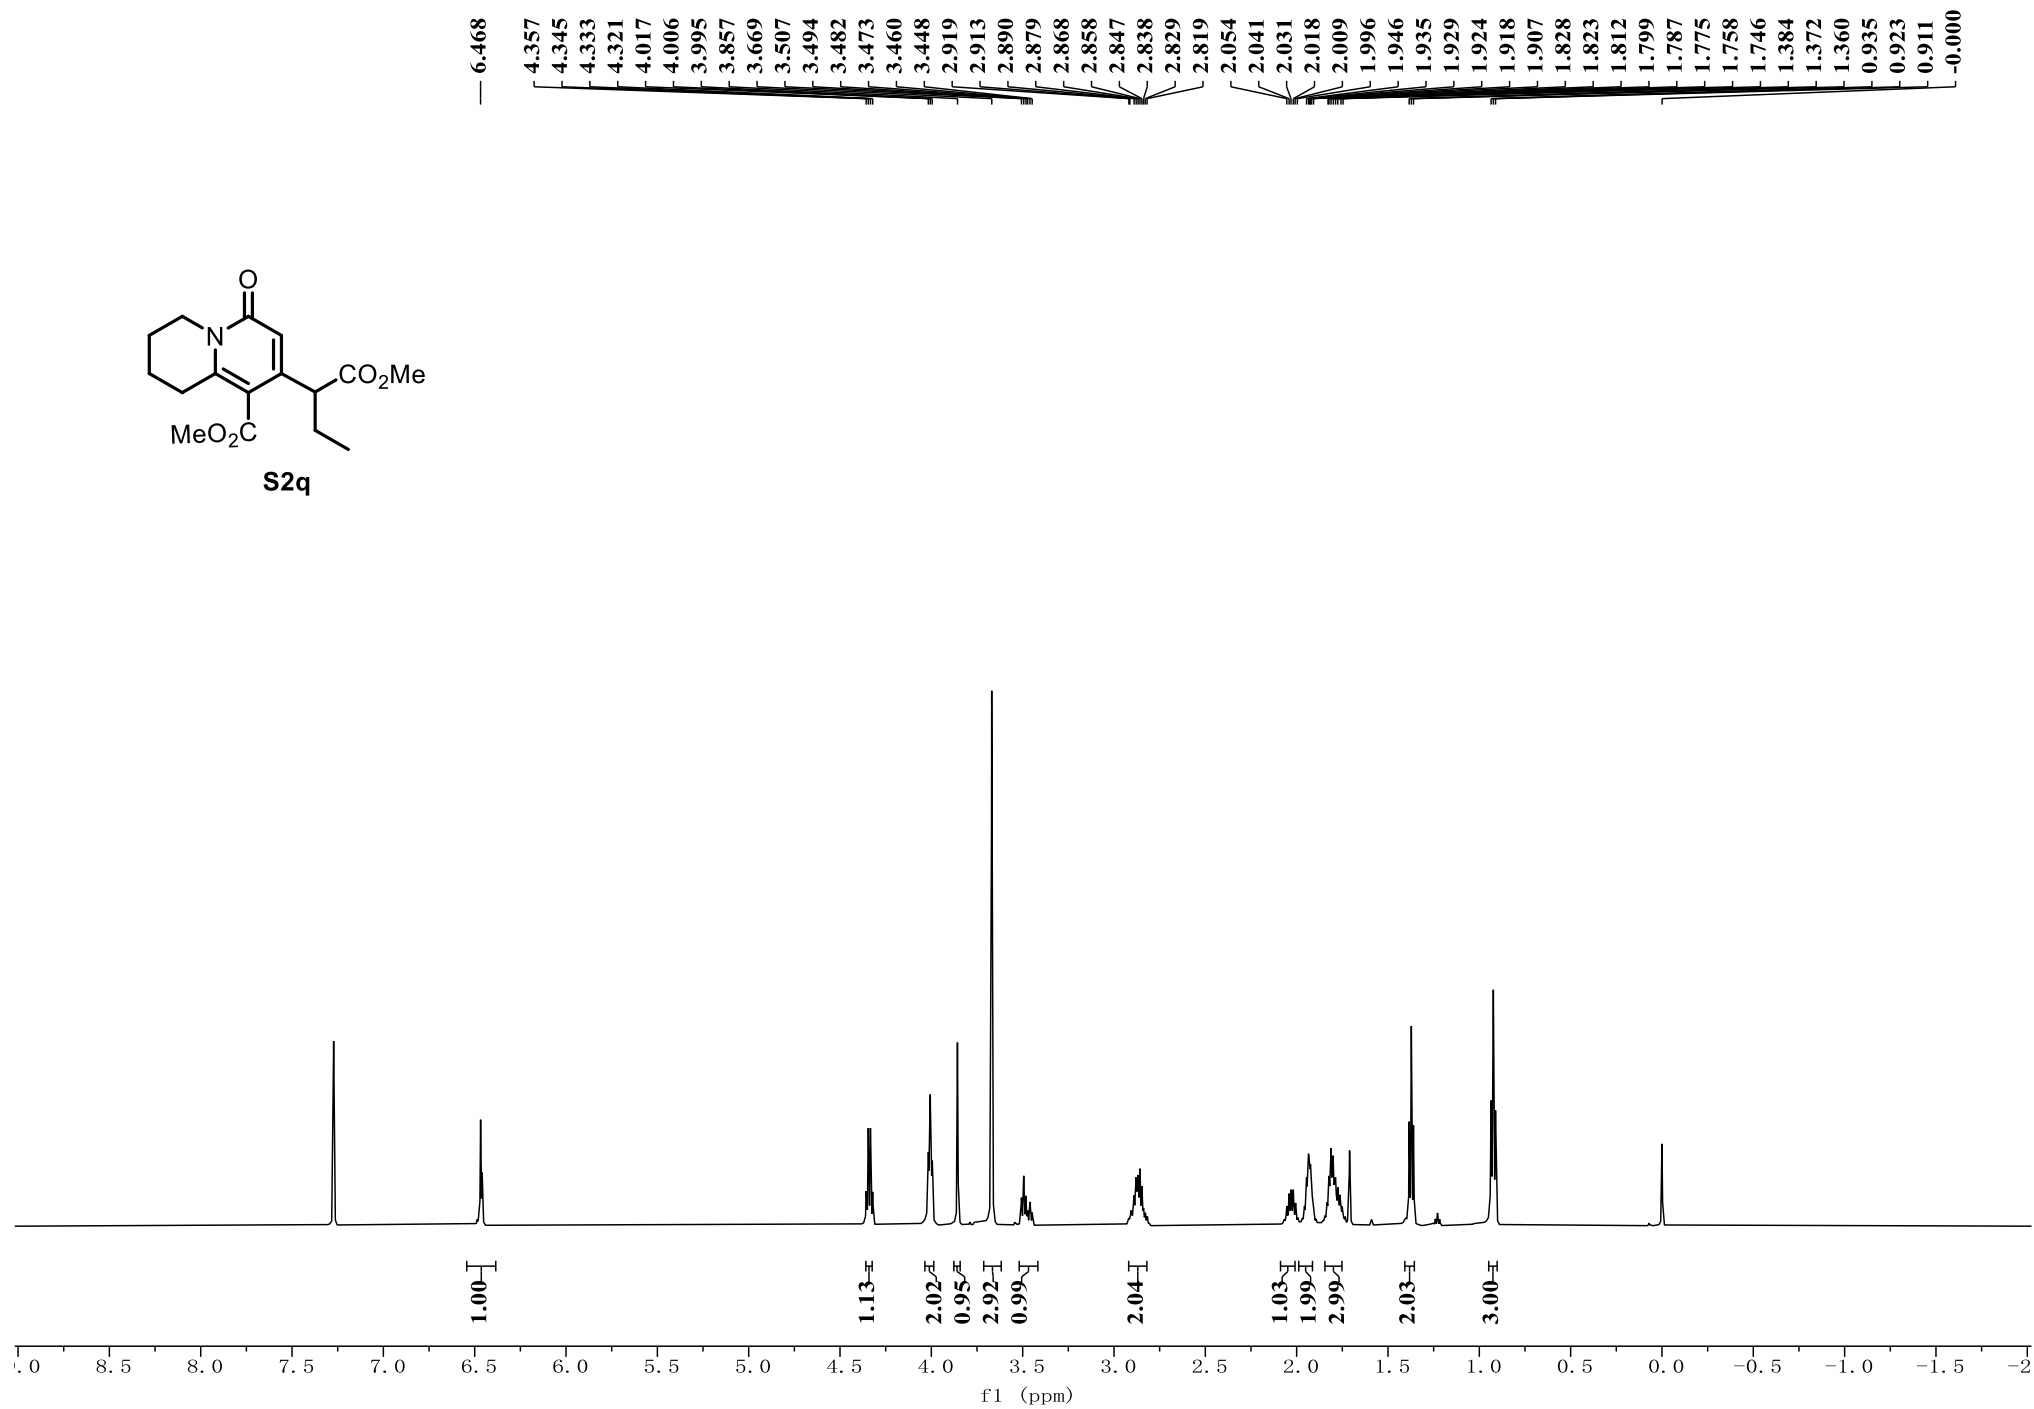

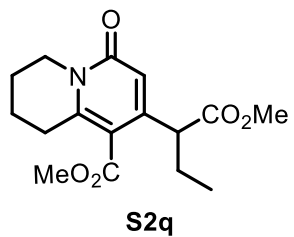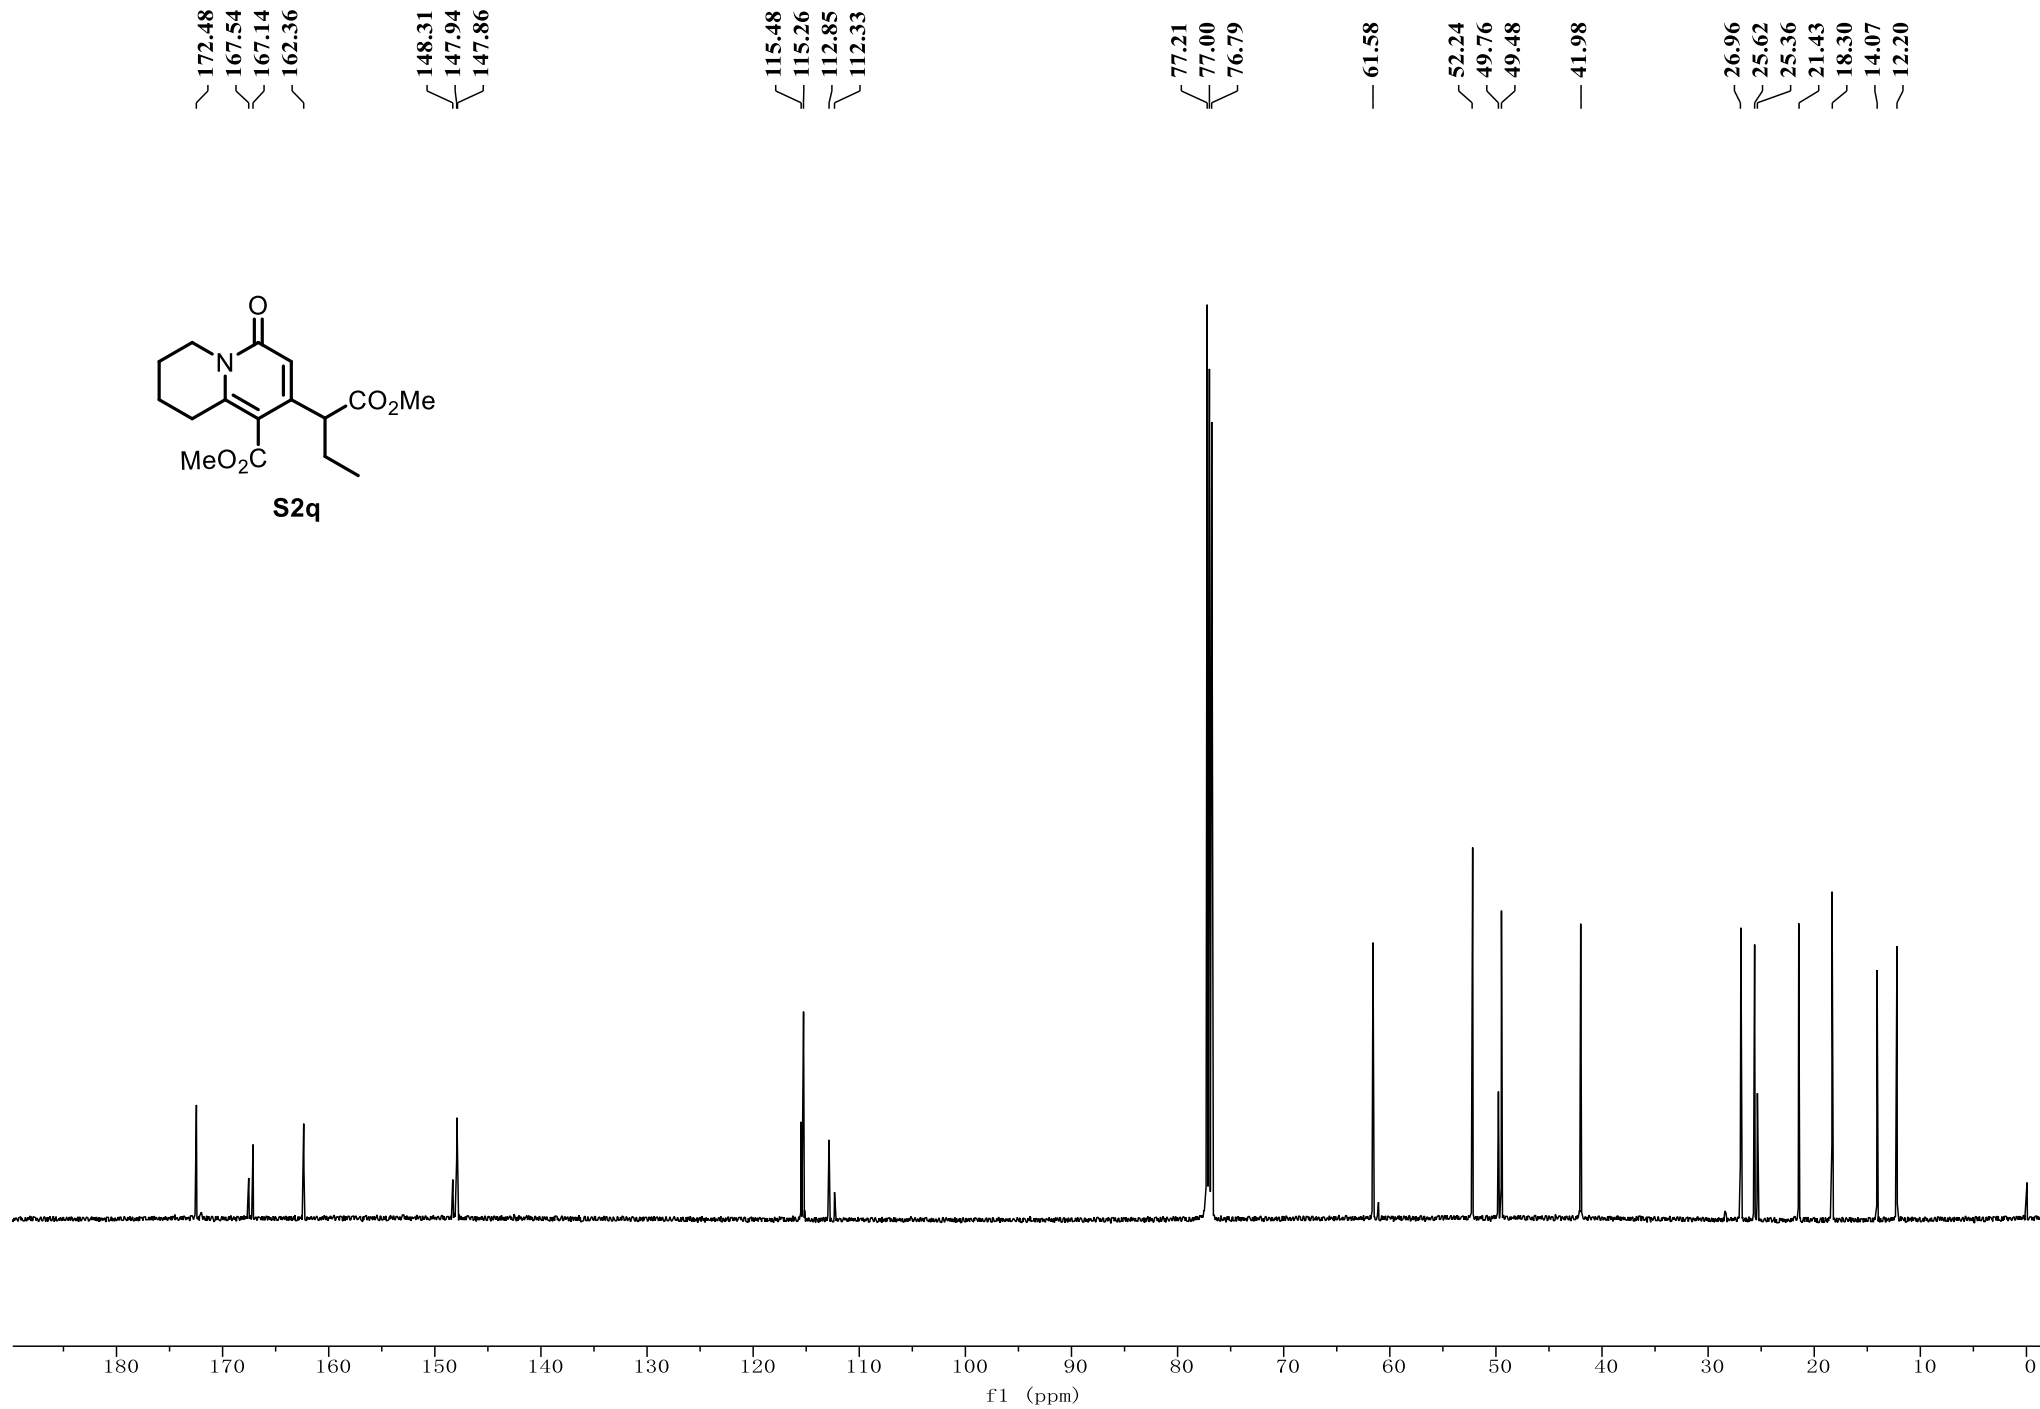

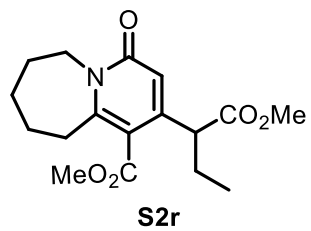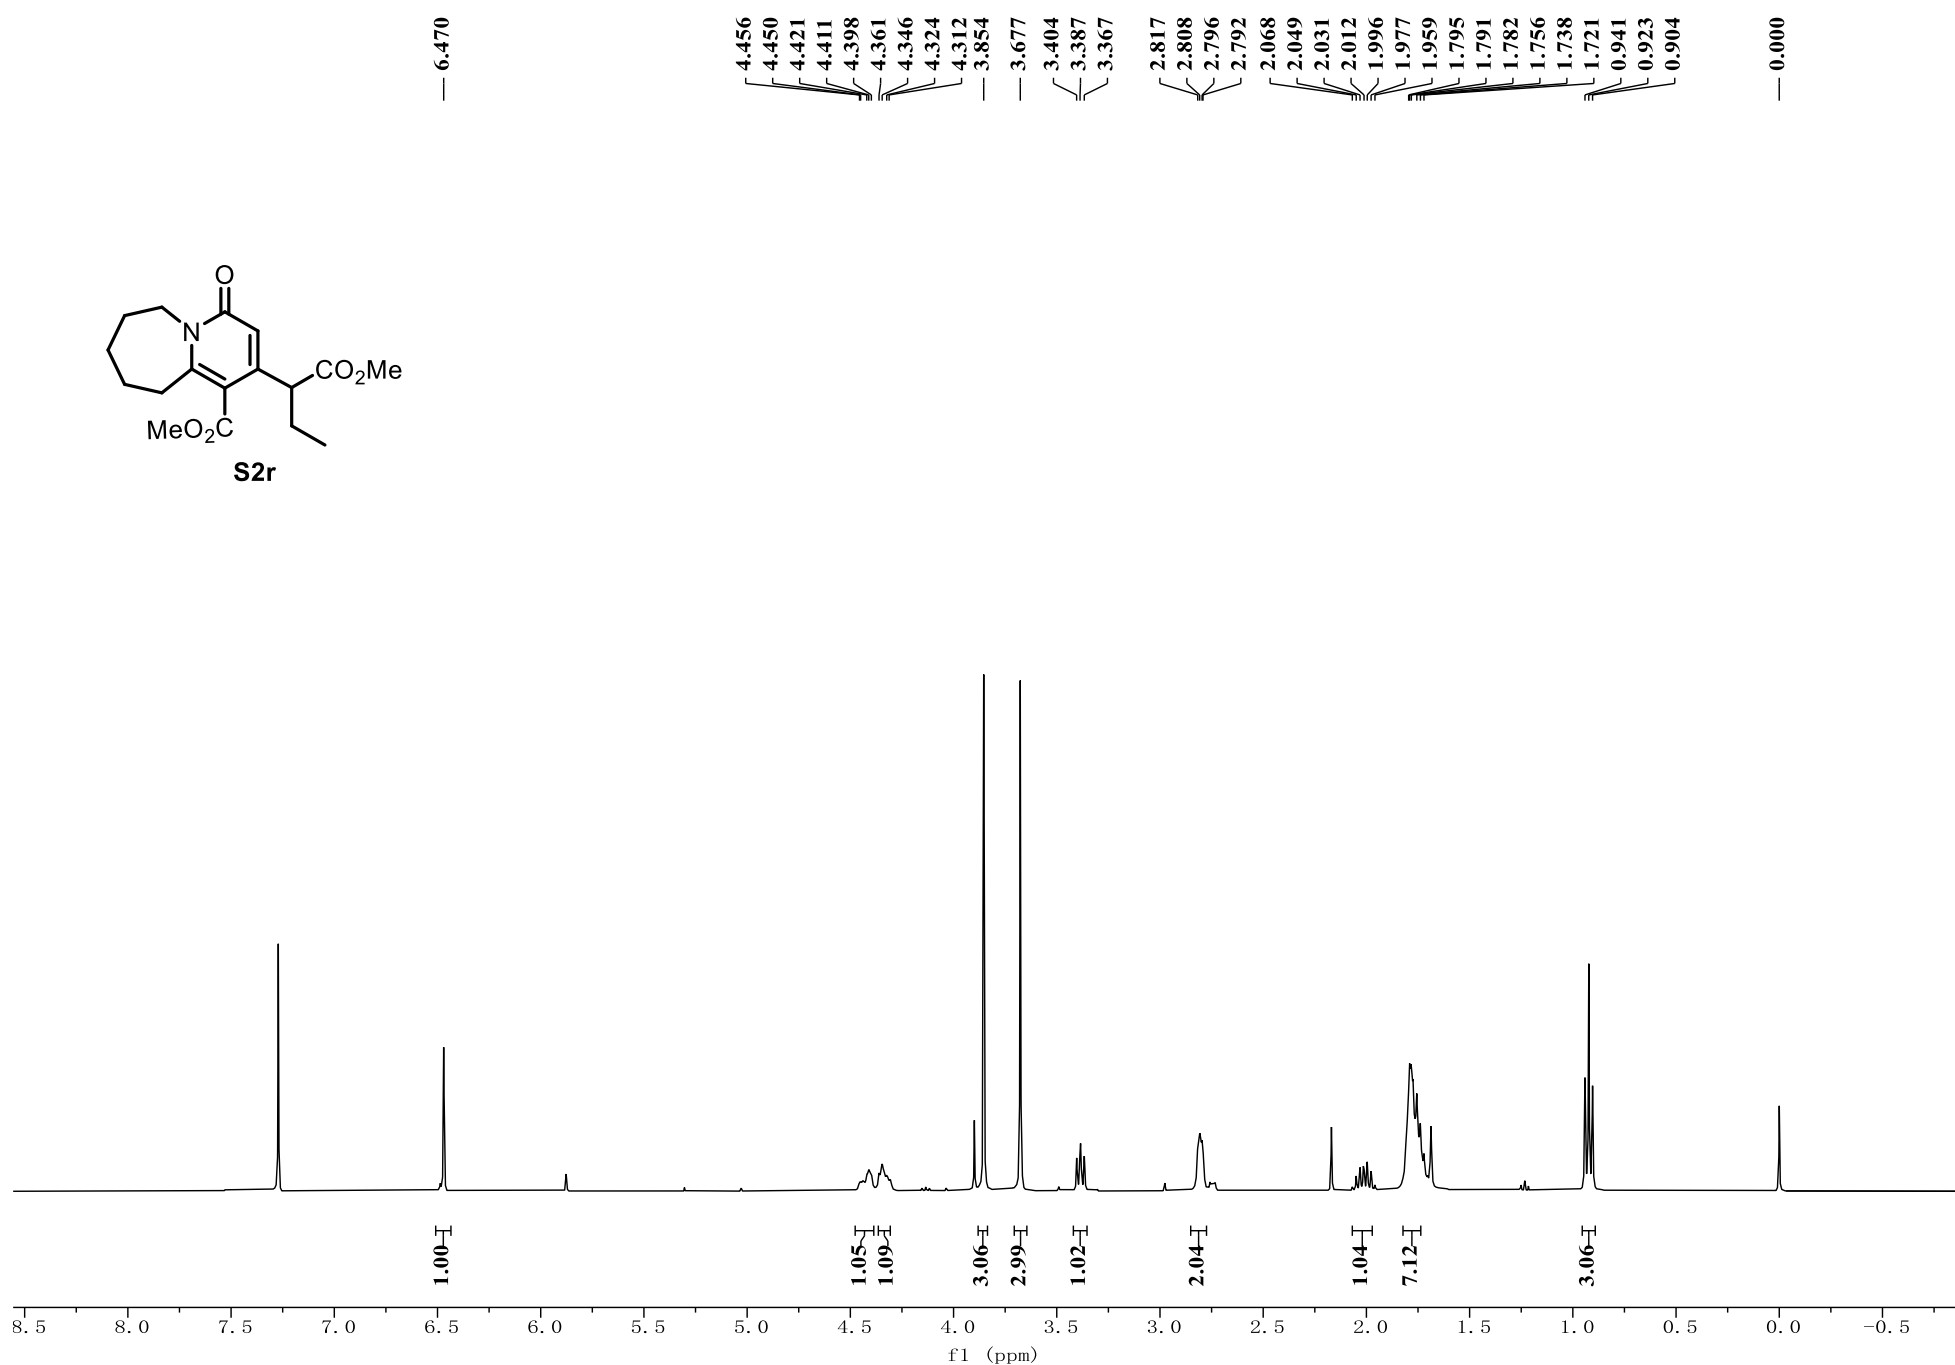

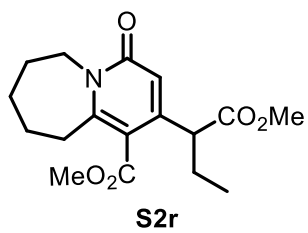

— 172.38  
— 168.07  
— 162.22

— 151.66  
— 147.69

116.24  
113.12  
108.13

77.21  
77.00  
76.79

52.36  
52.21  
49.67

— 43.41

31.75  
29.08  
27.15  
25.99  
25.52

— 12.23

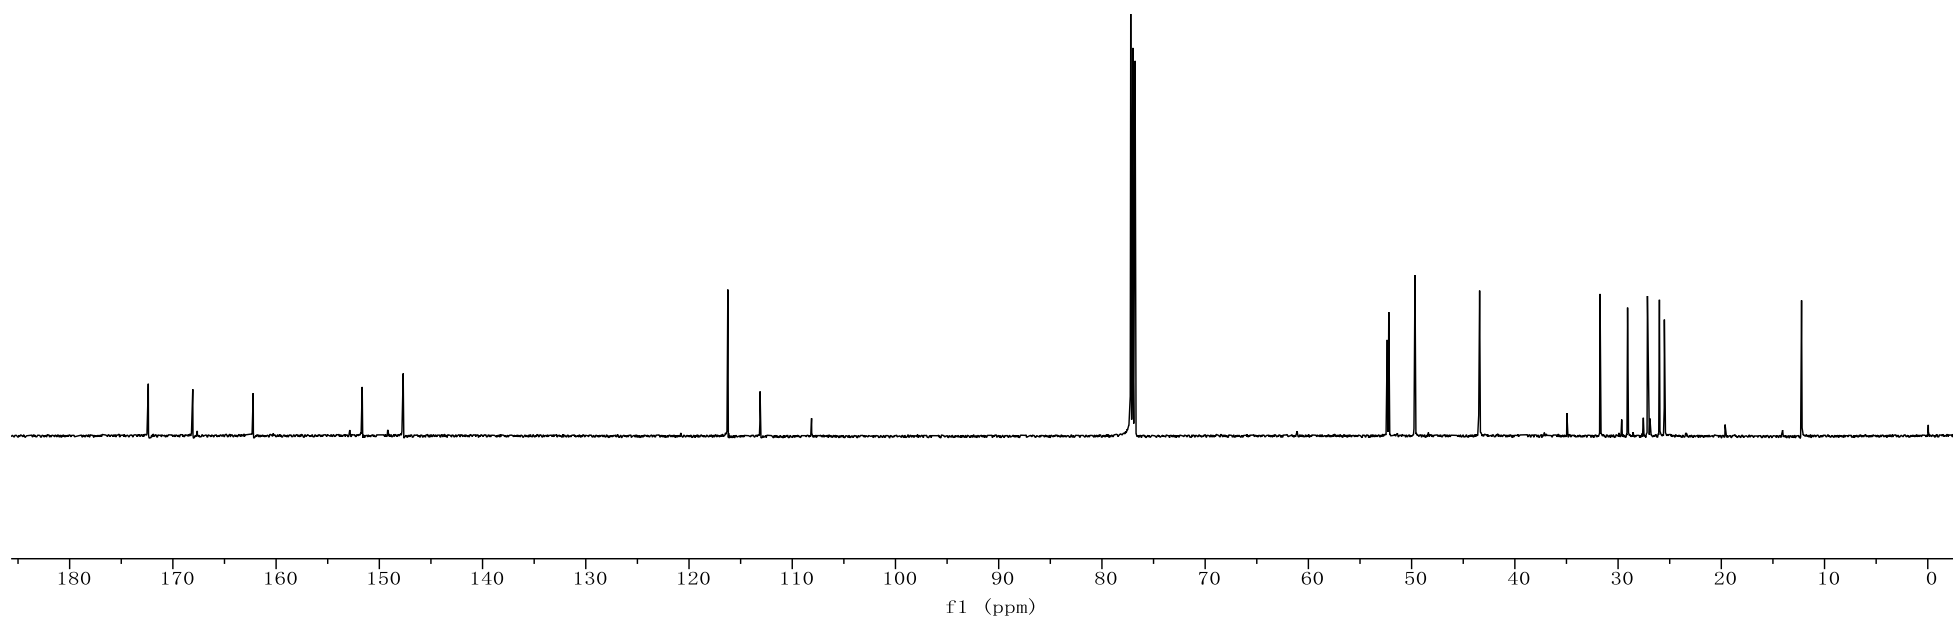

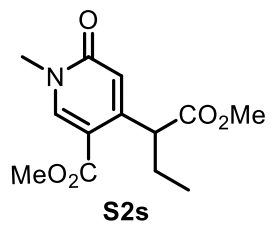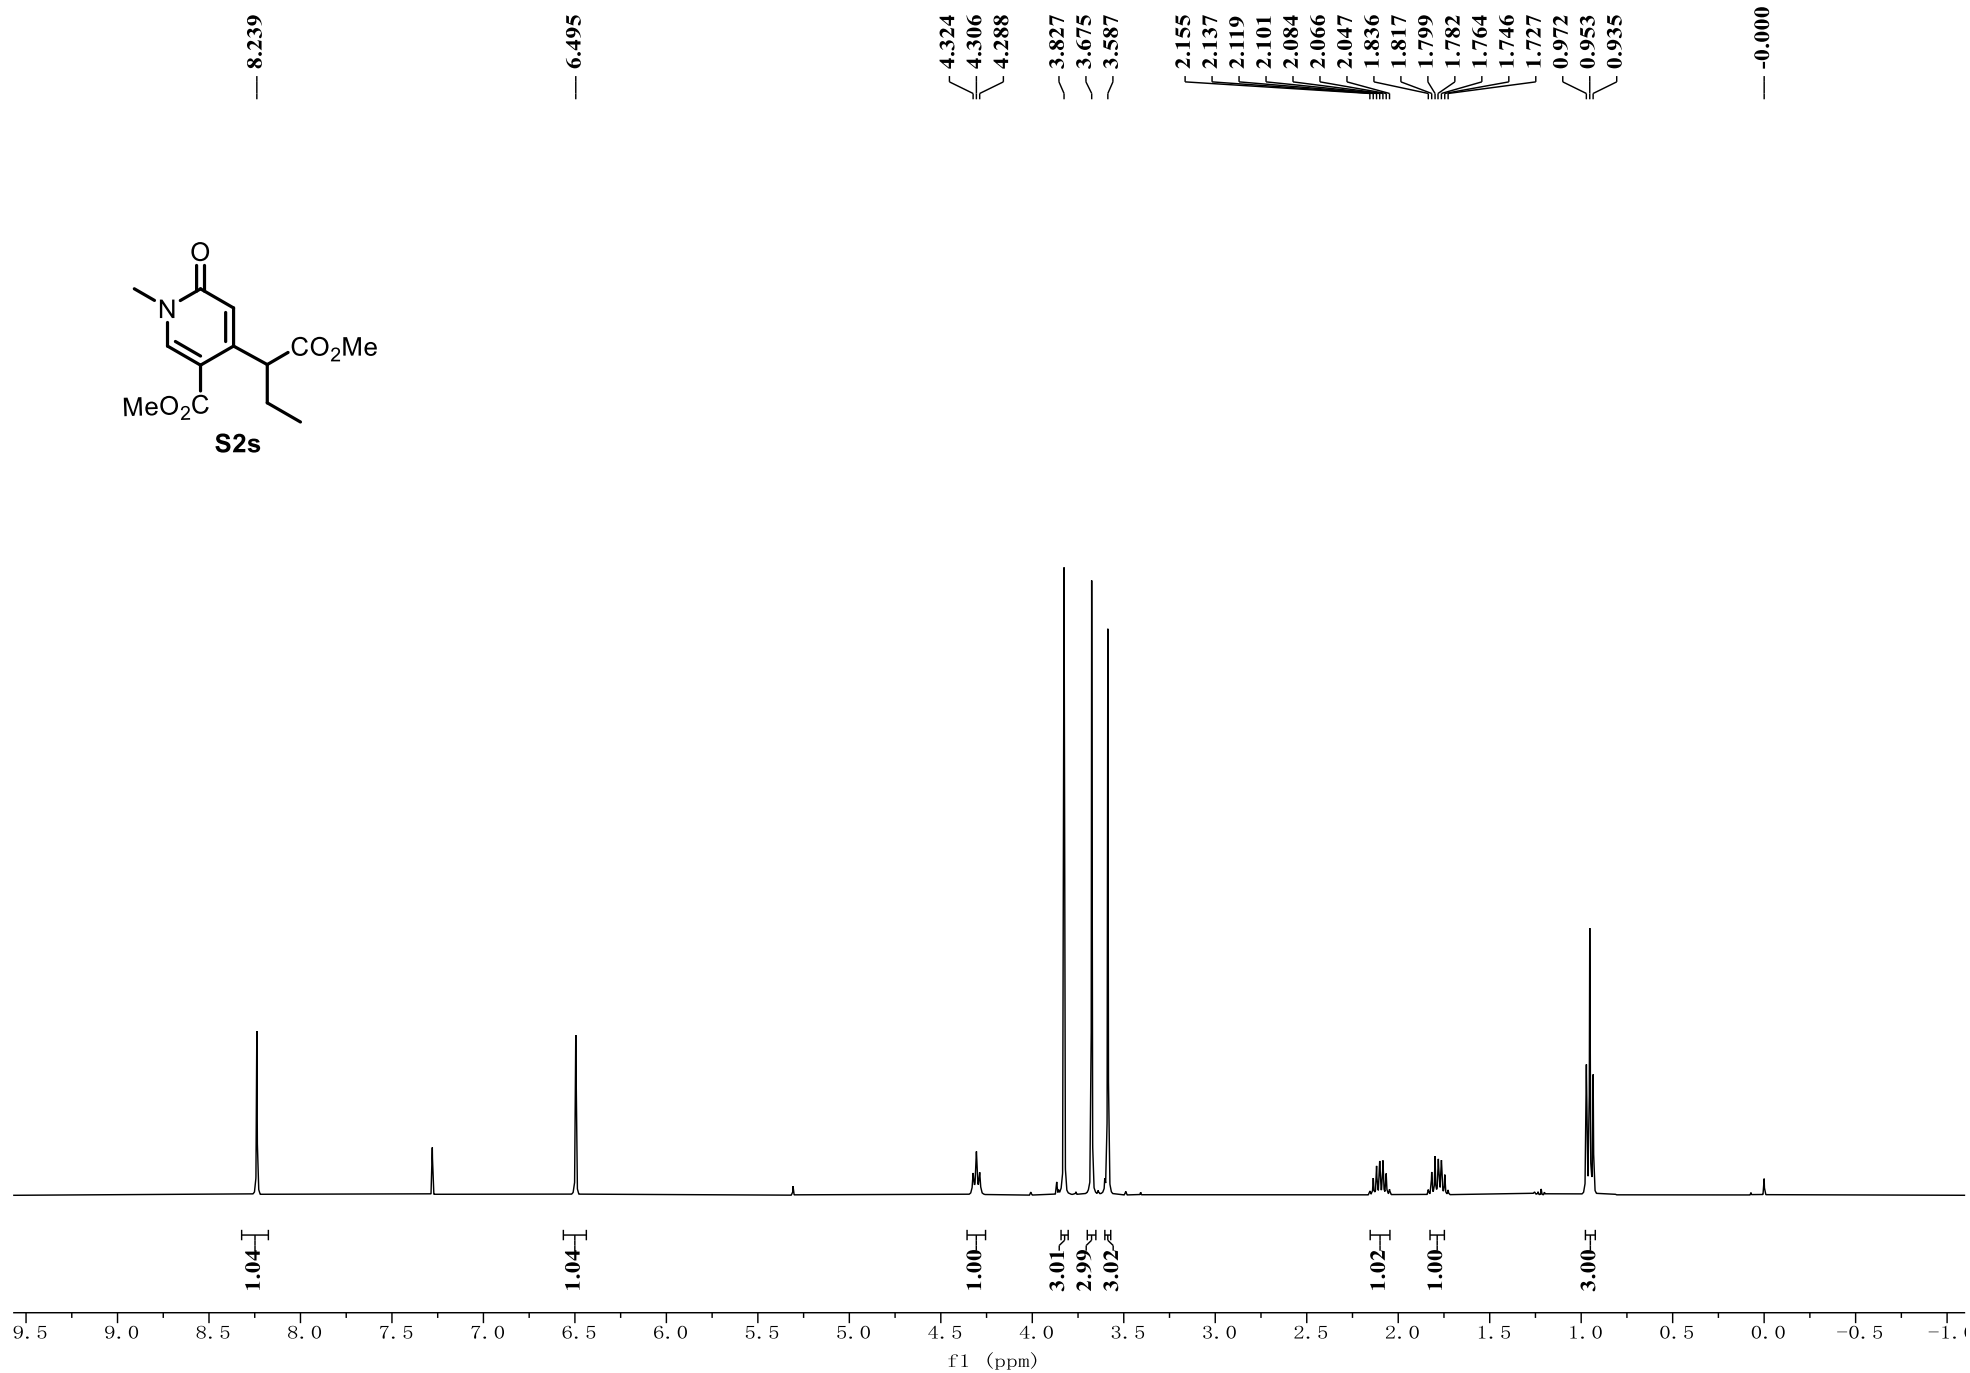

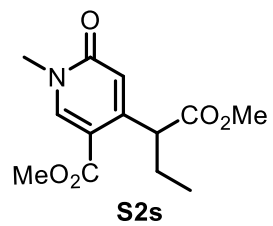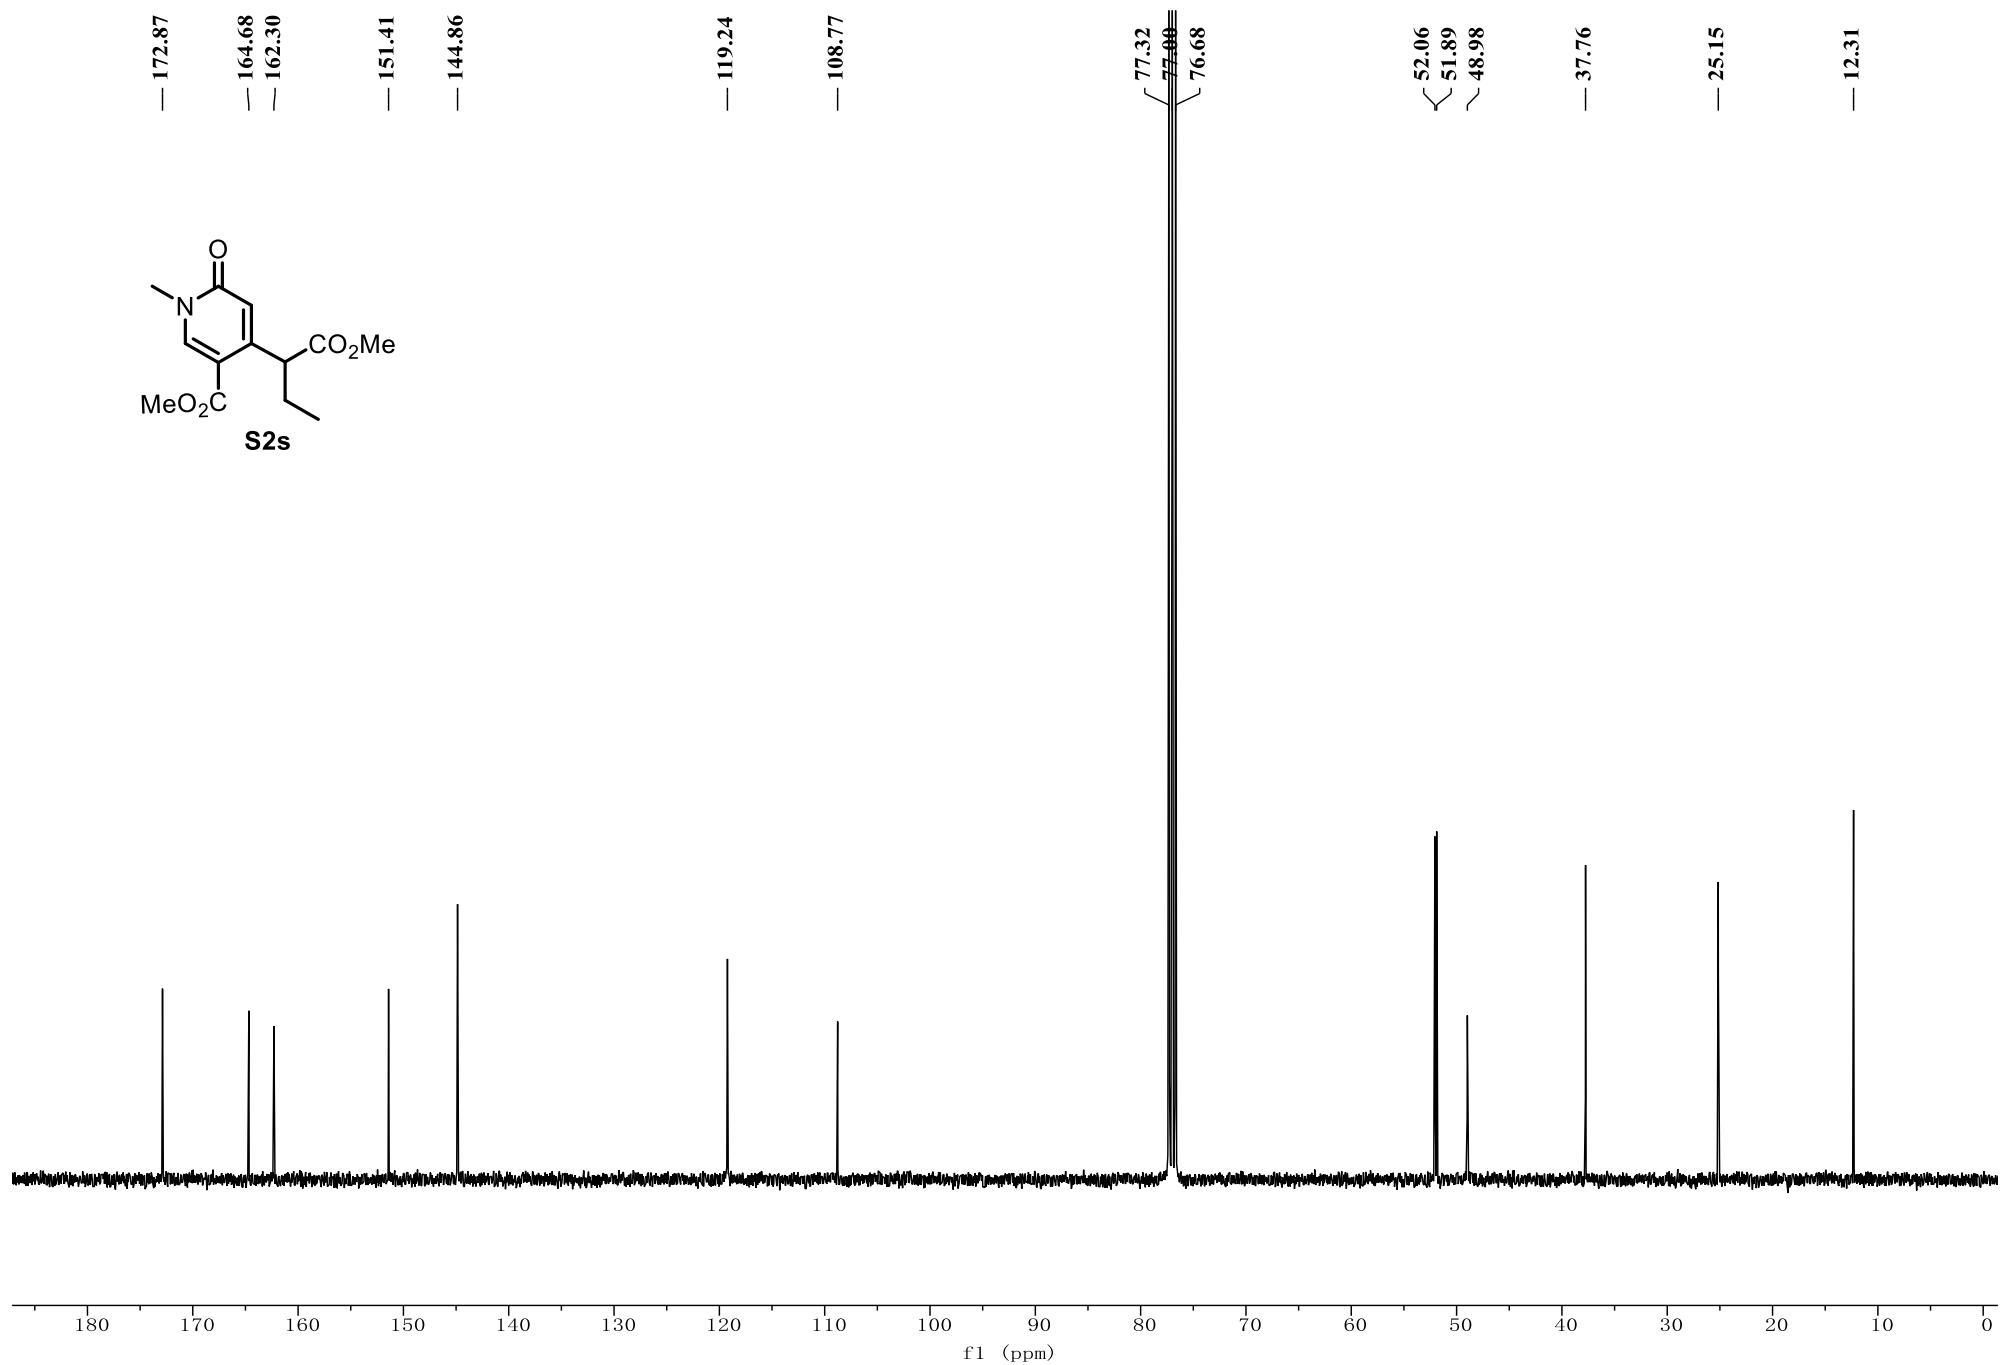

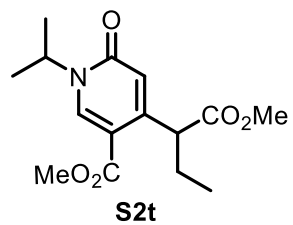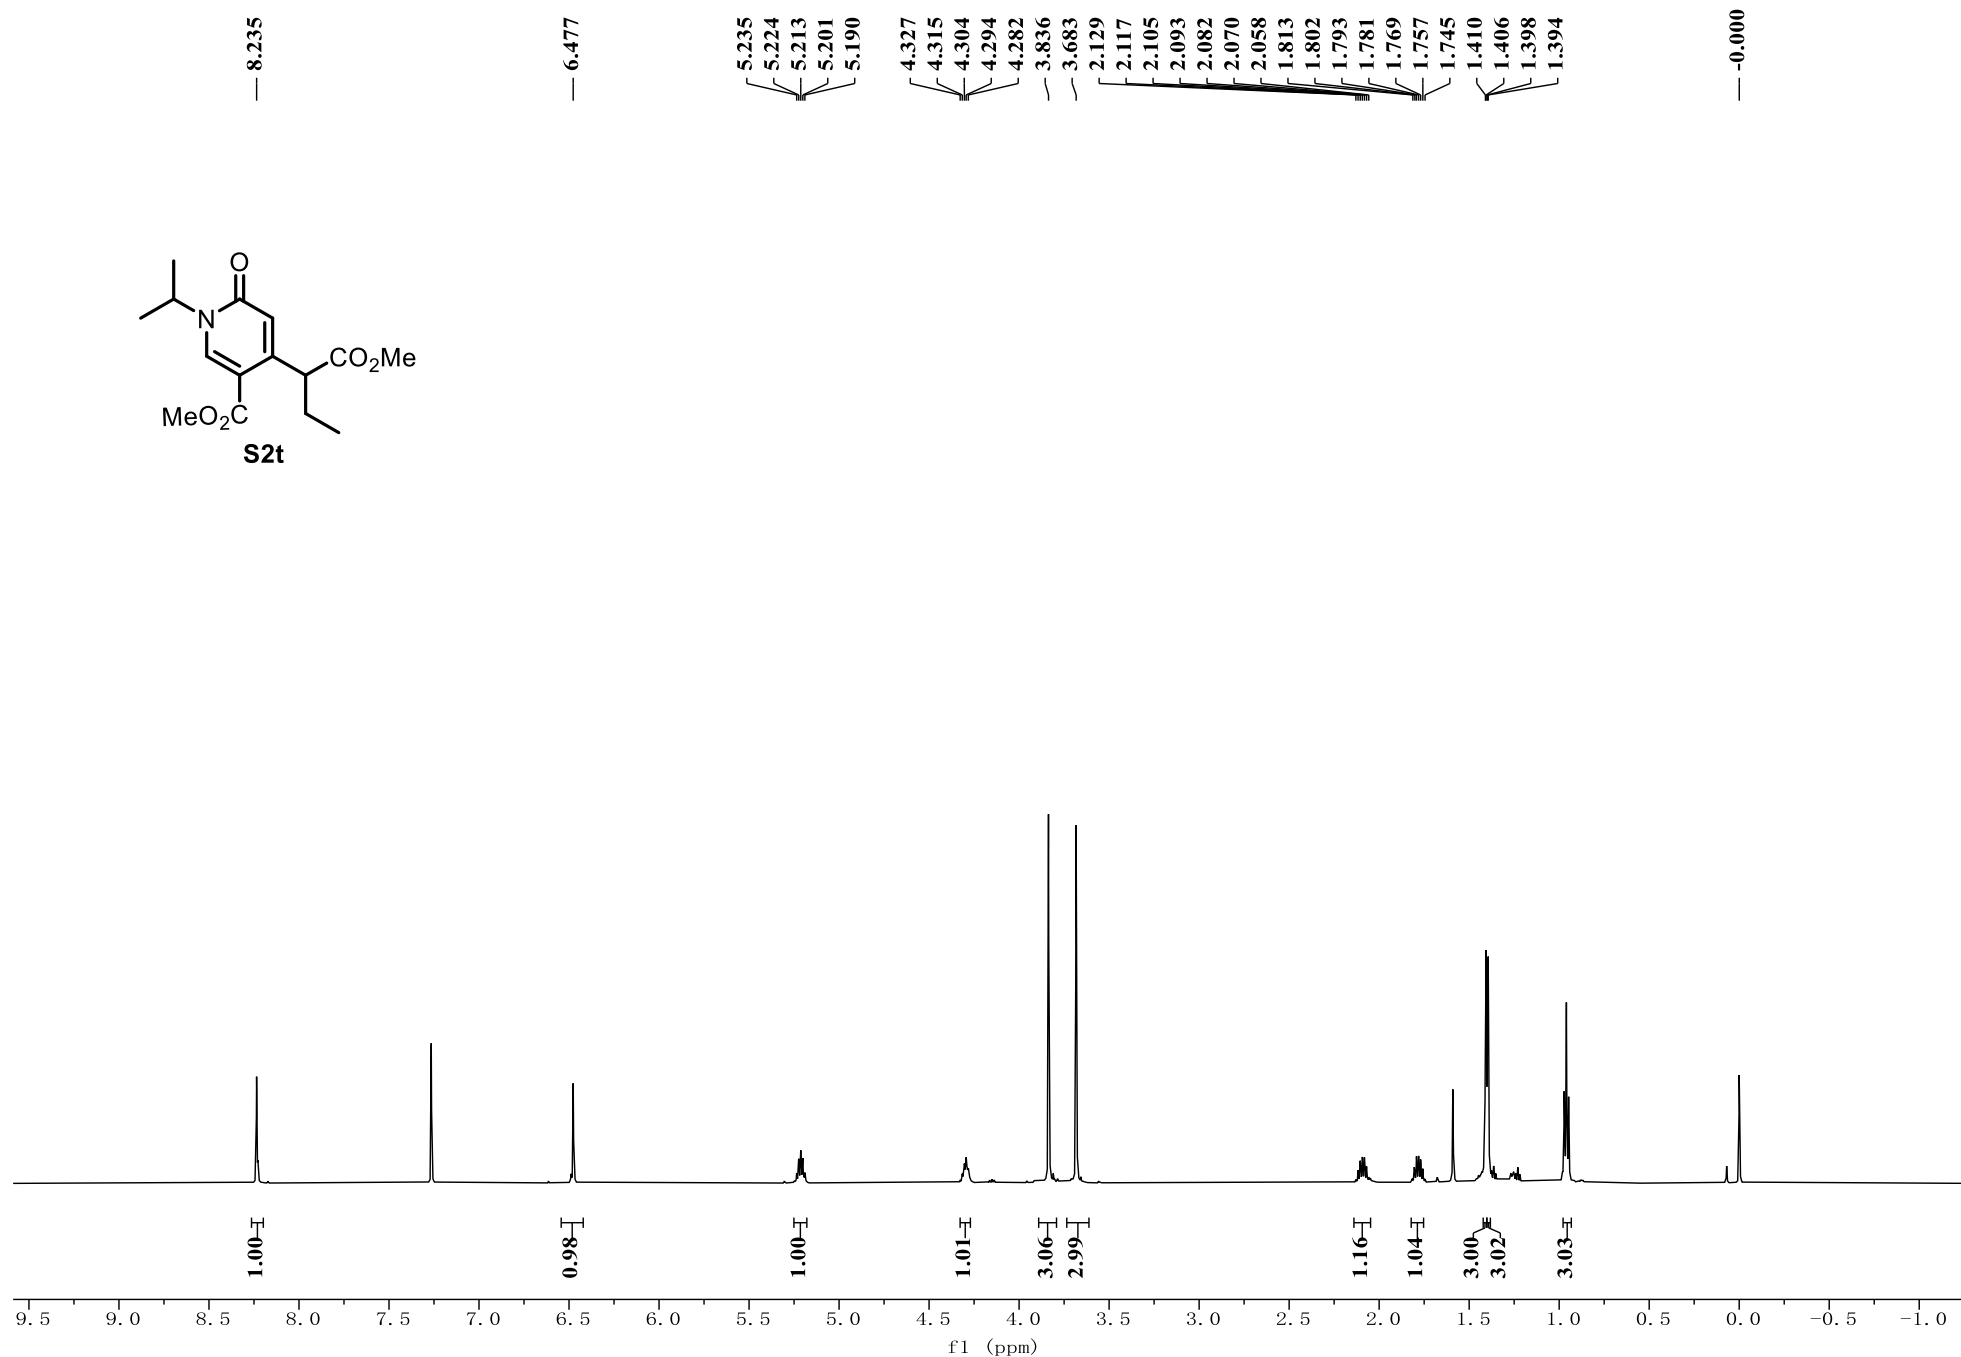

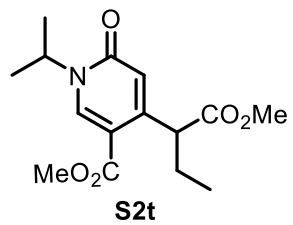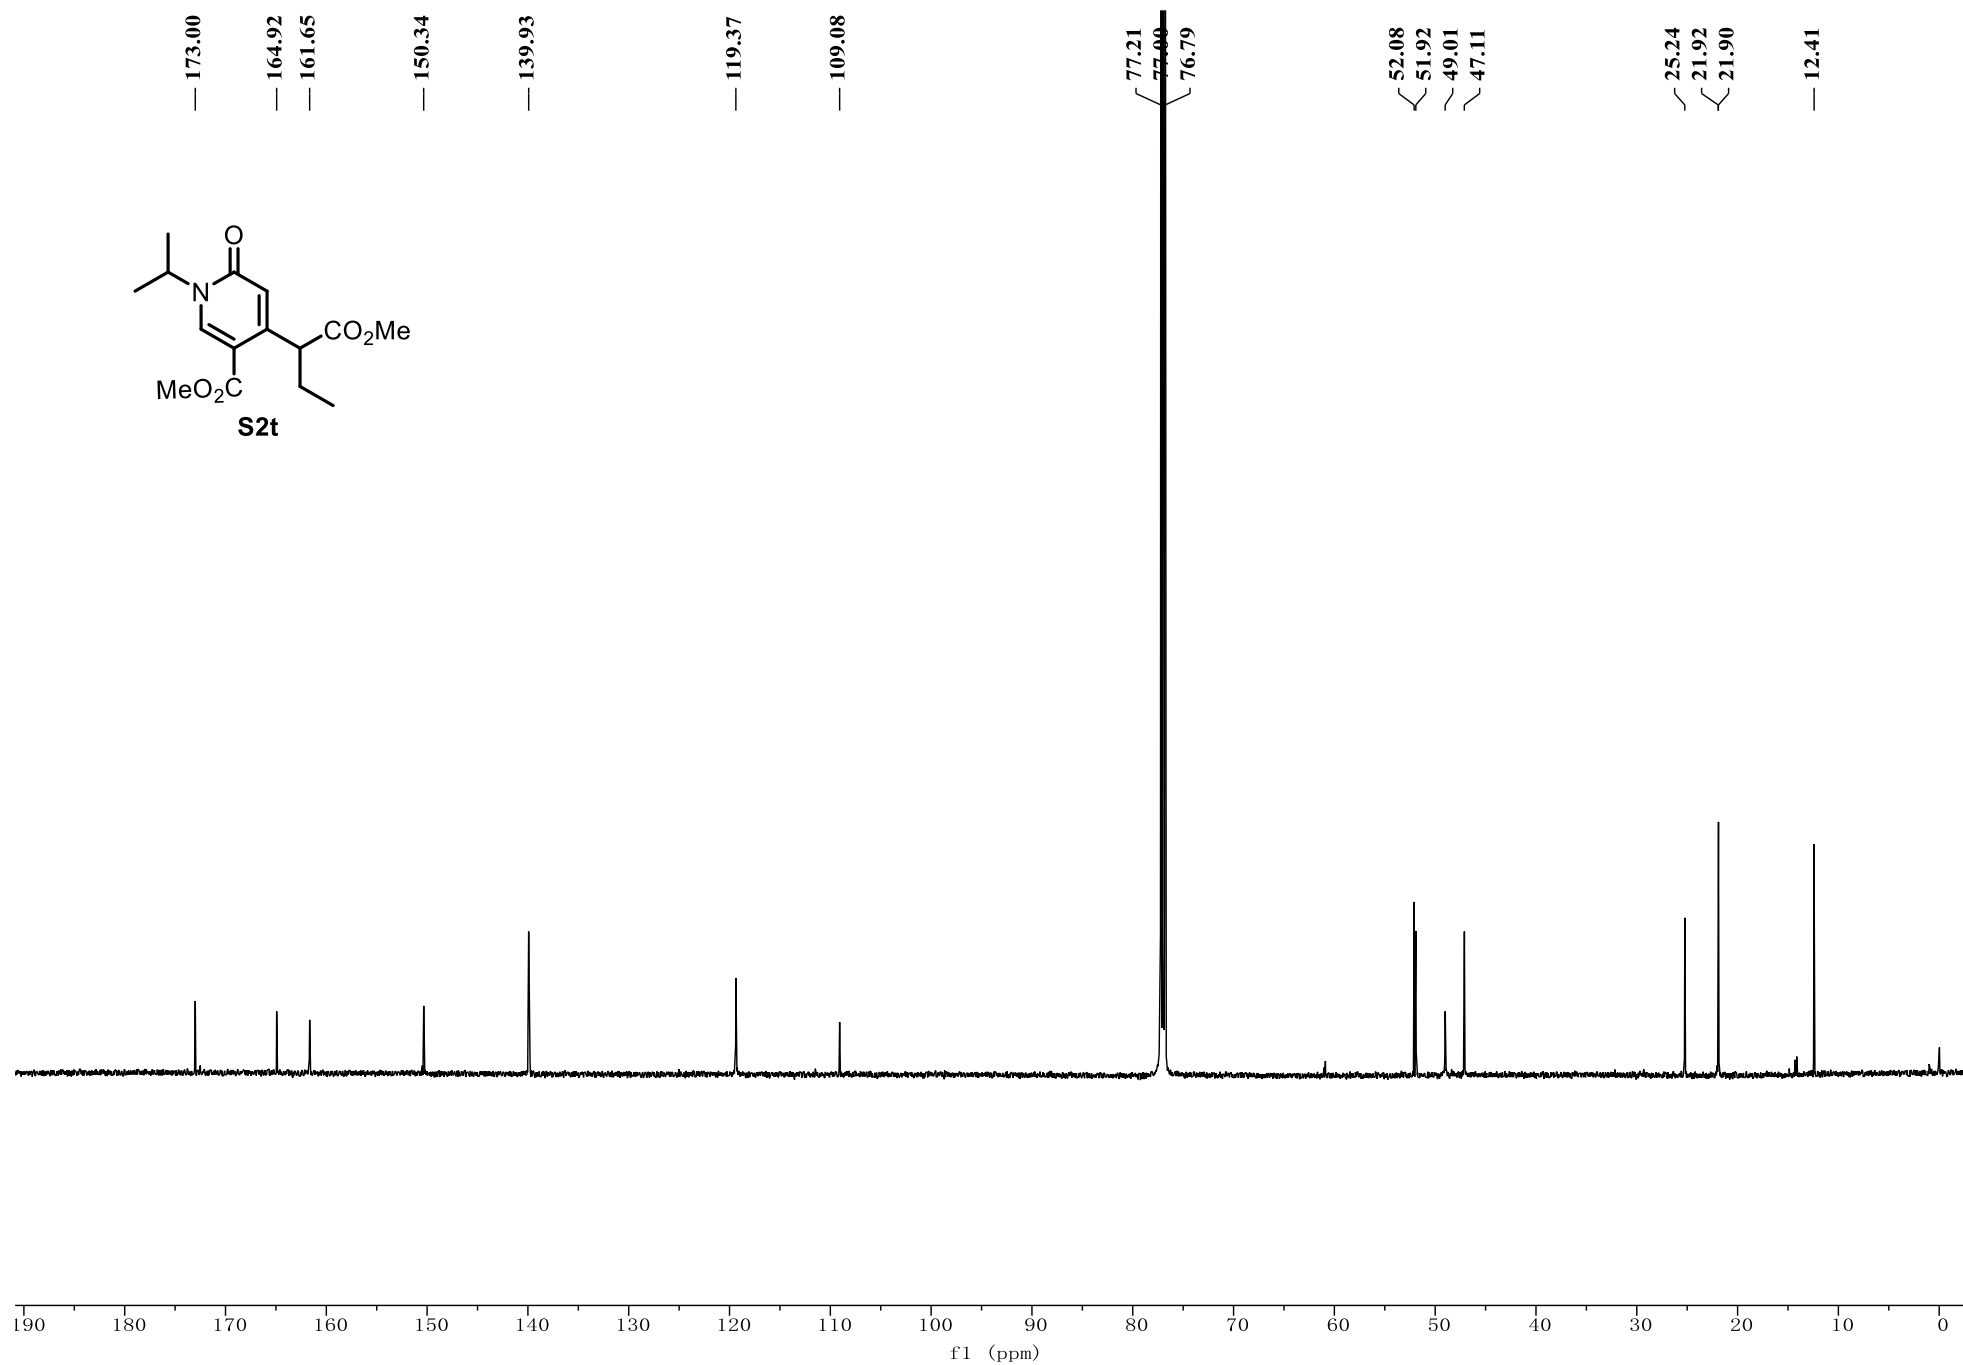

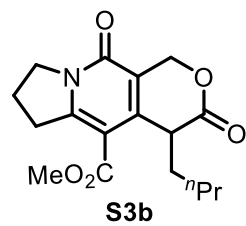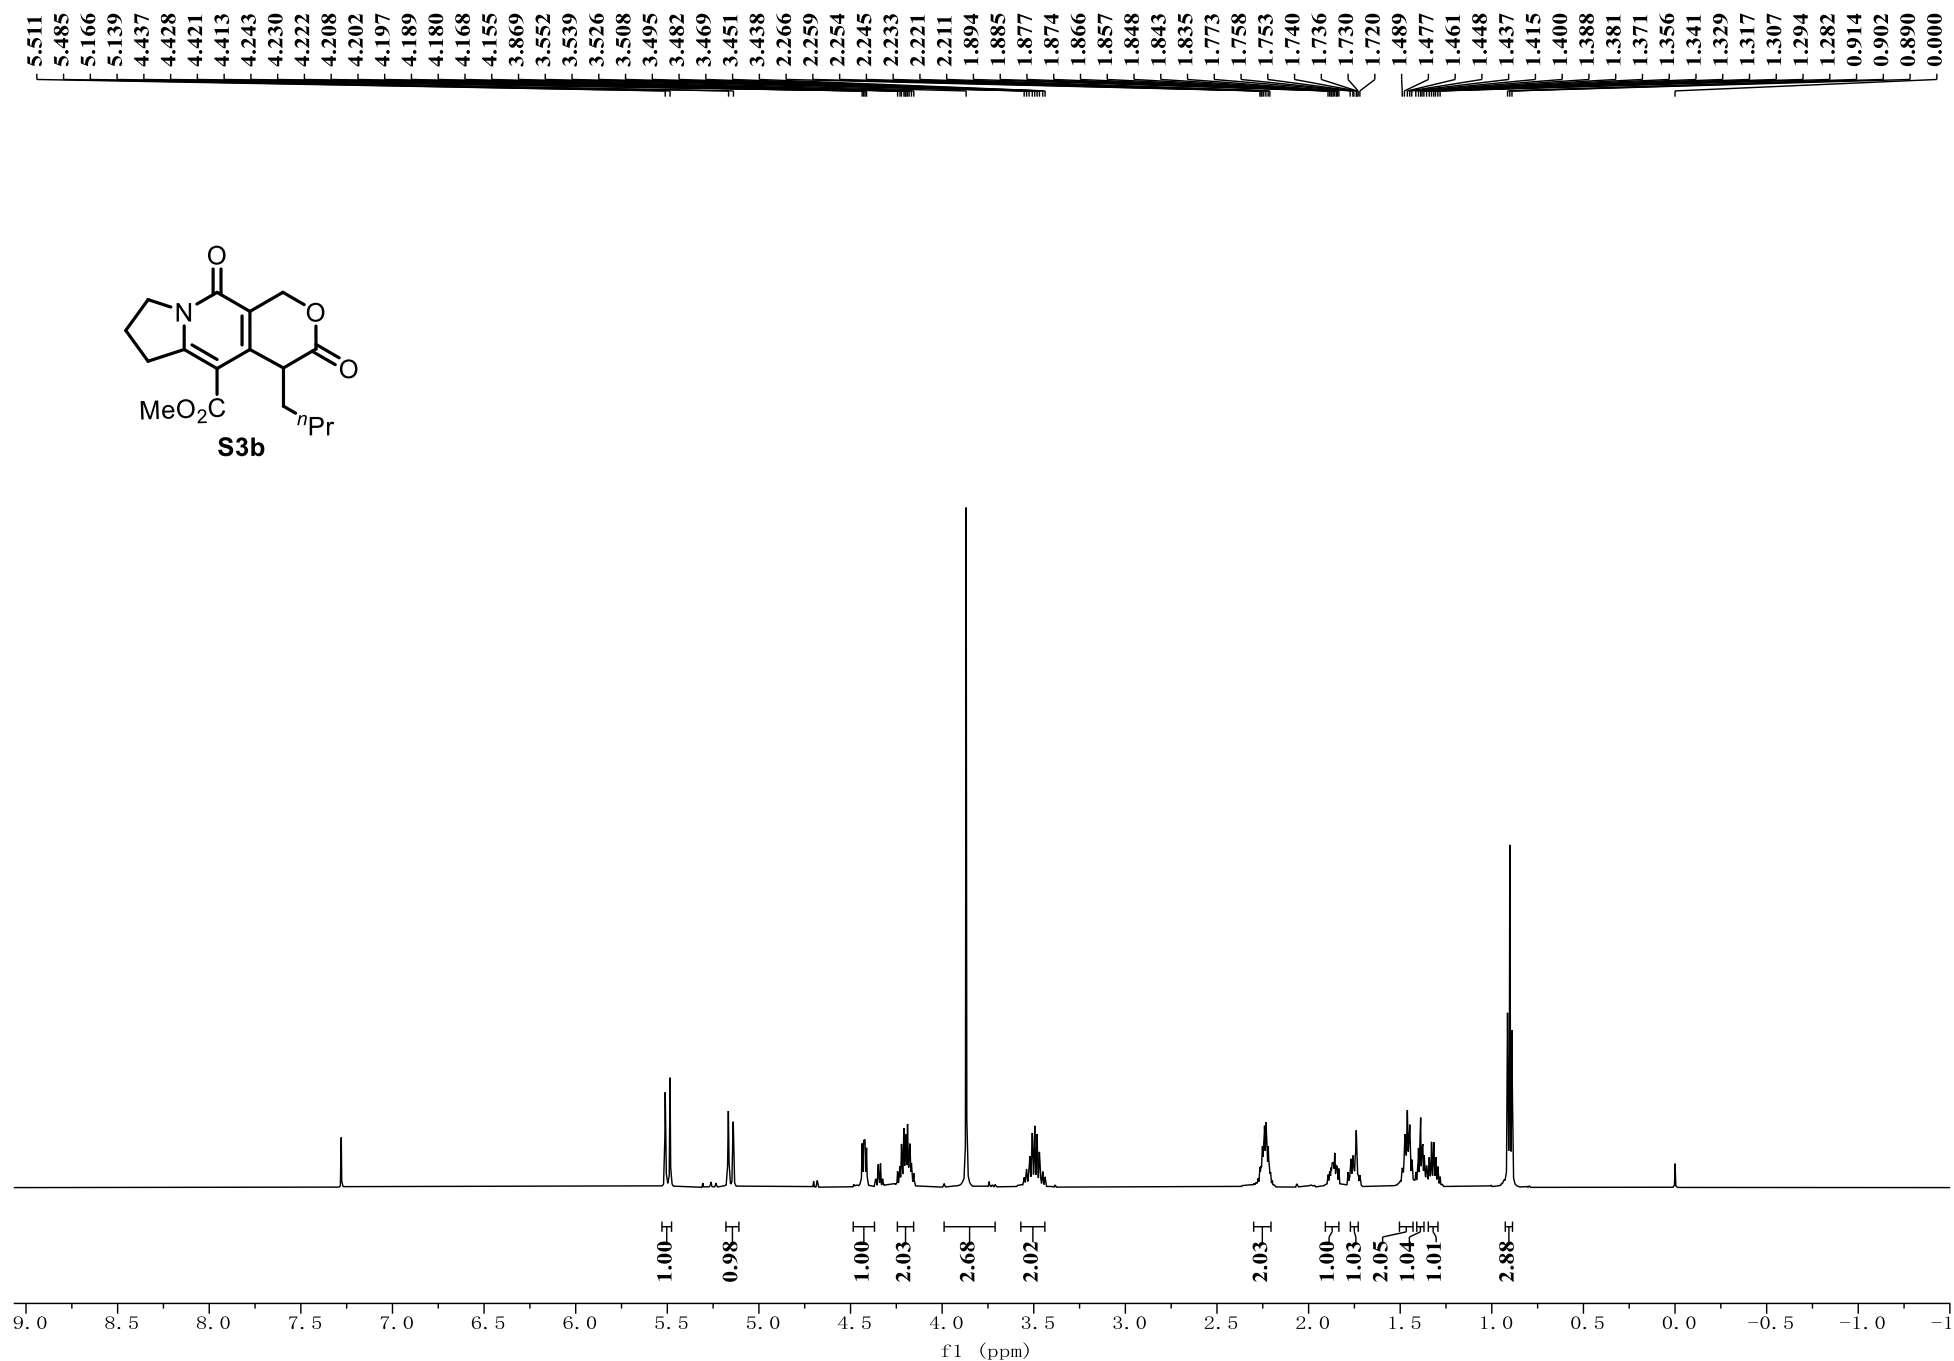

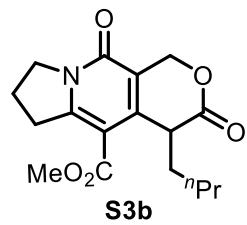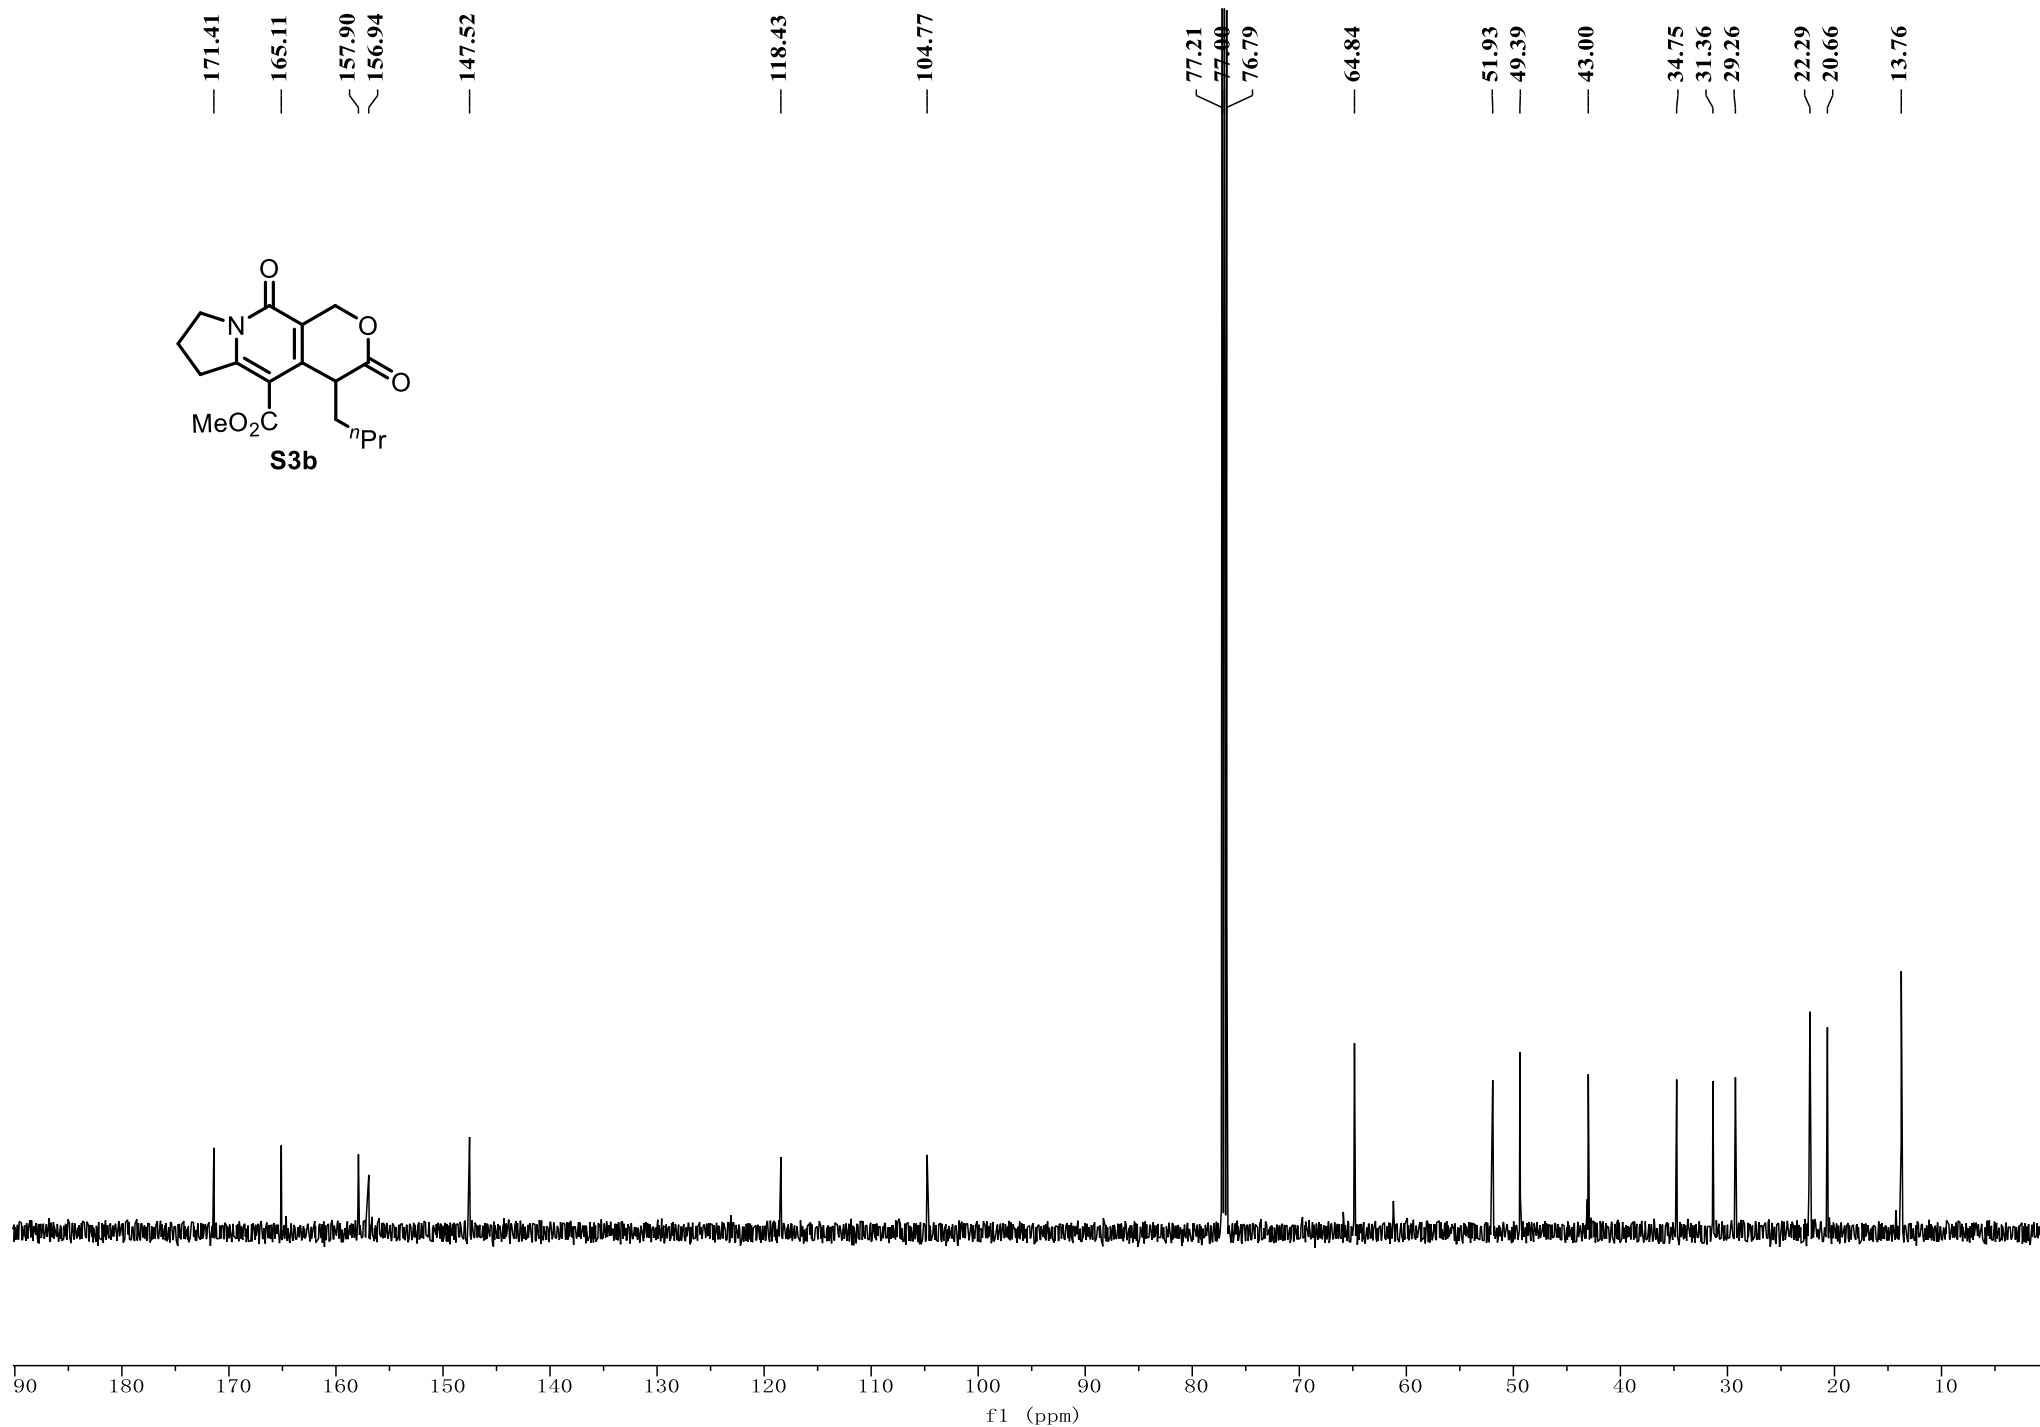

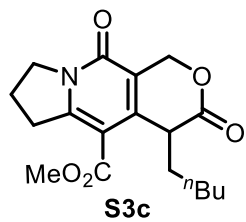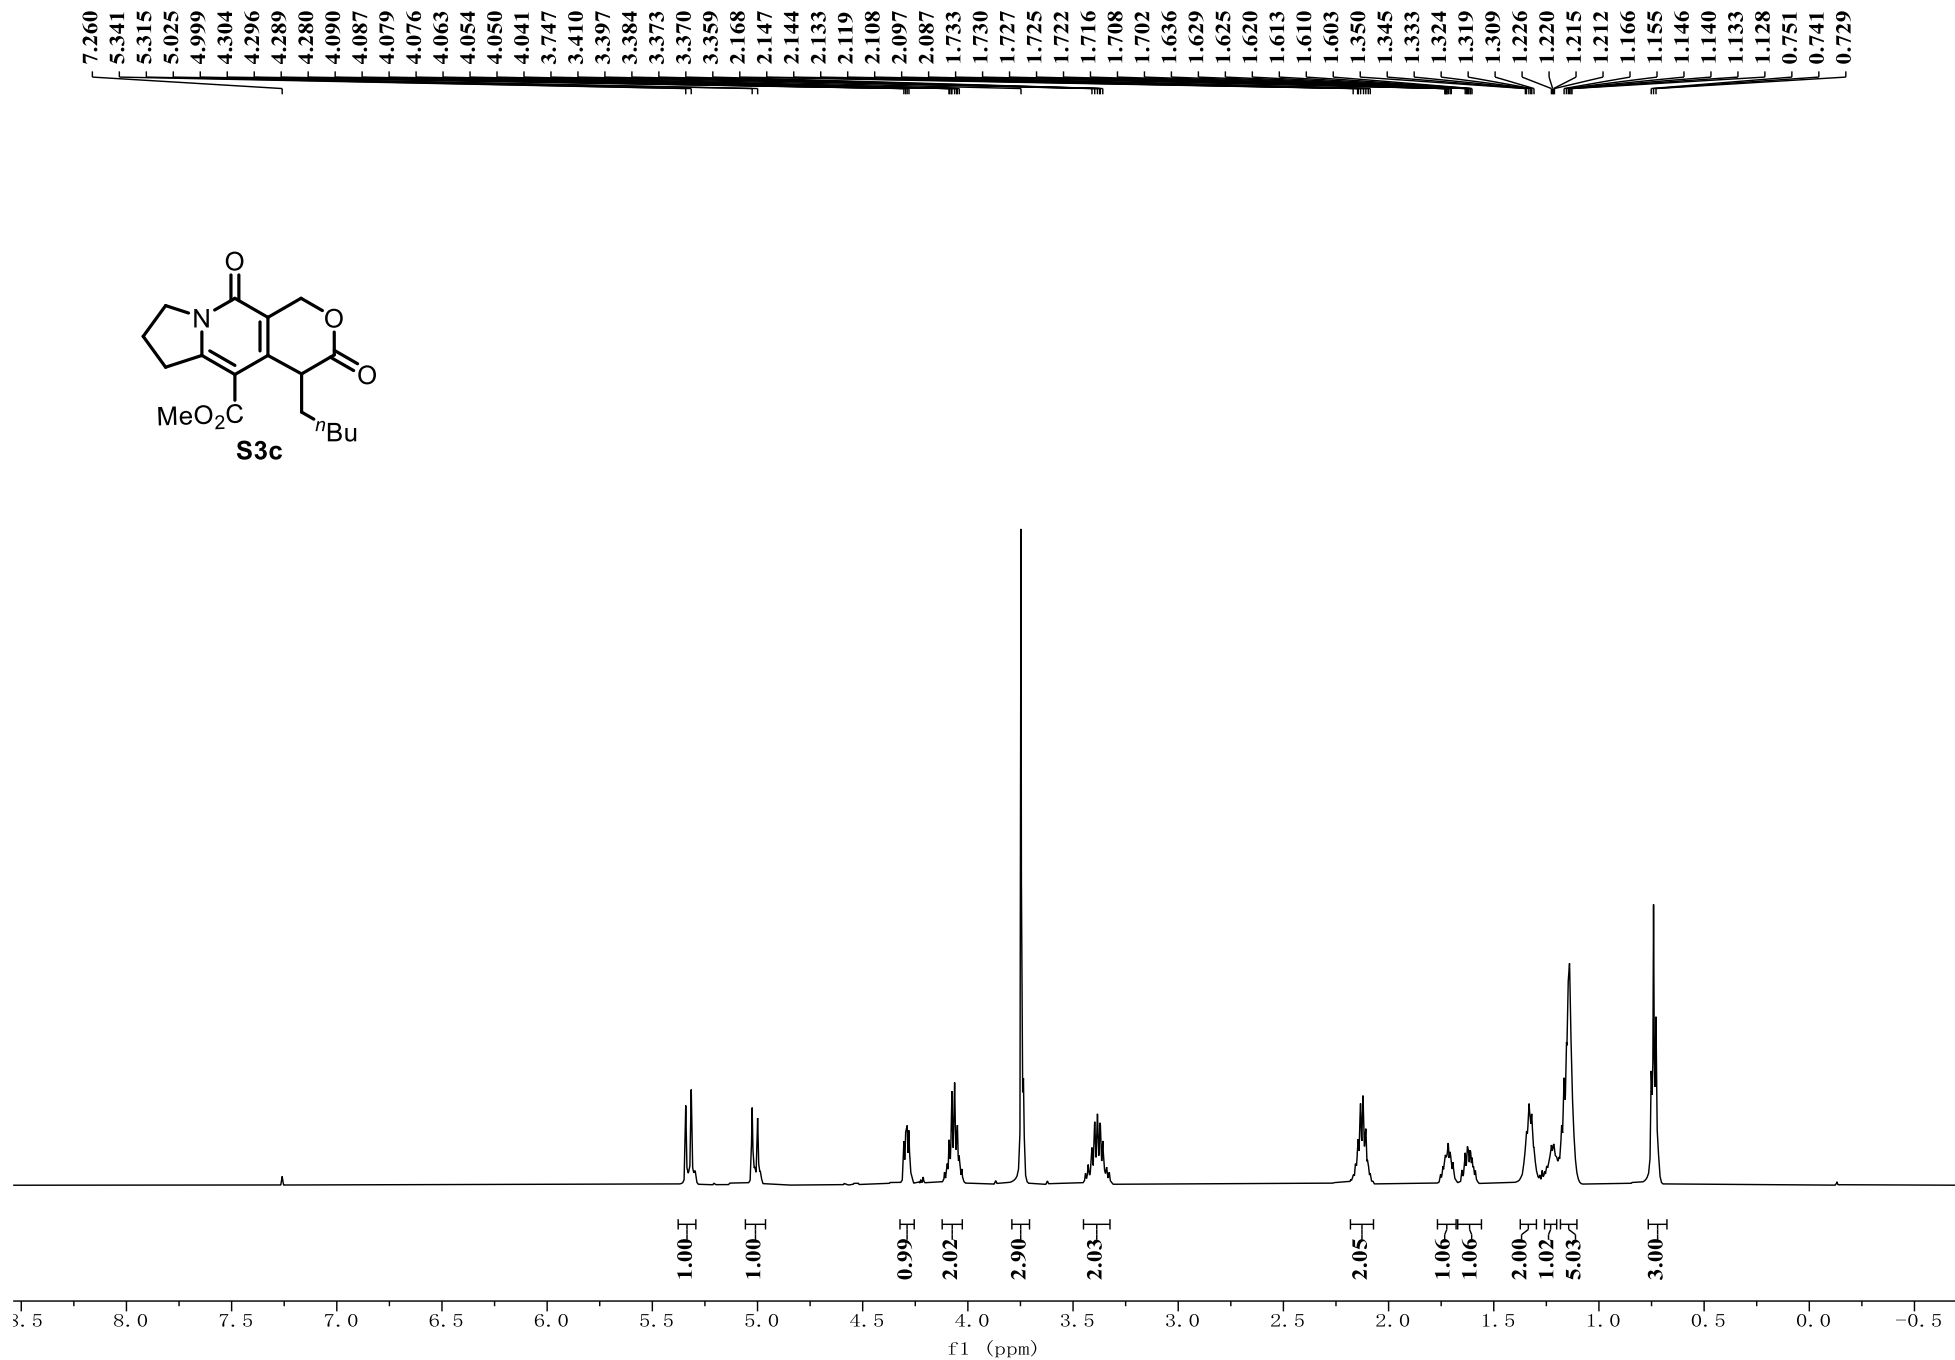

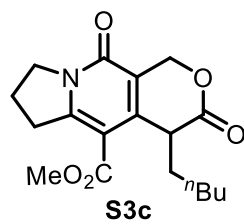

— 171.04  
 — 164.76  
 157.53  
 156.81  
 — 147.18

— 117.92

— 104.36

77.21  
 77.00  
 76.79

— 64.49

51.59  
 49.12  
 42.64

34.51  
 31.29  
 31.16  
 28.51  
 26.82  
 22.16  
 20.34  
 13.67

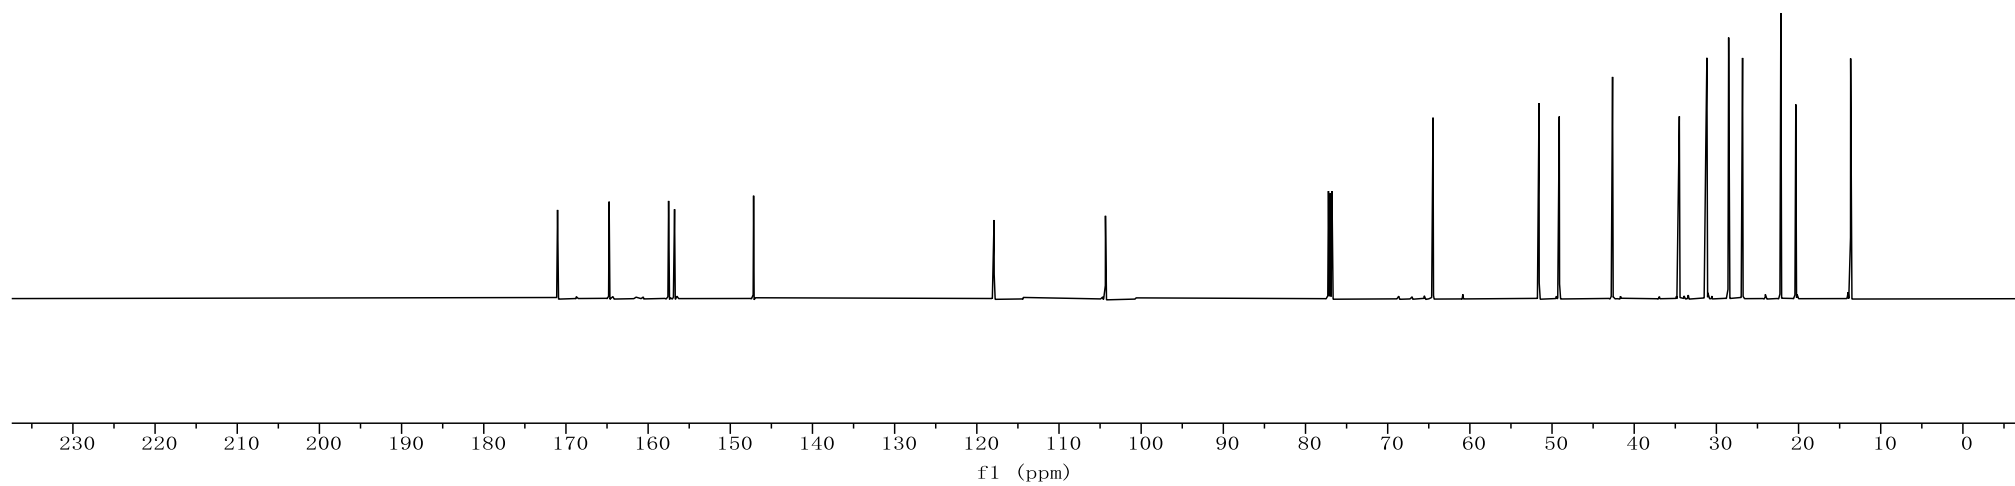

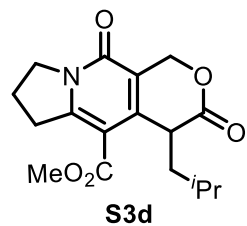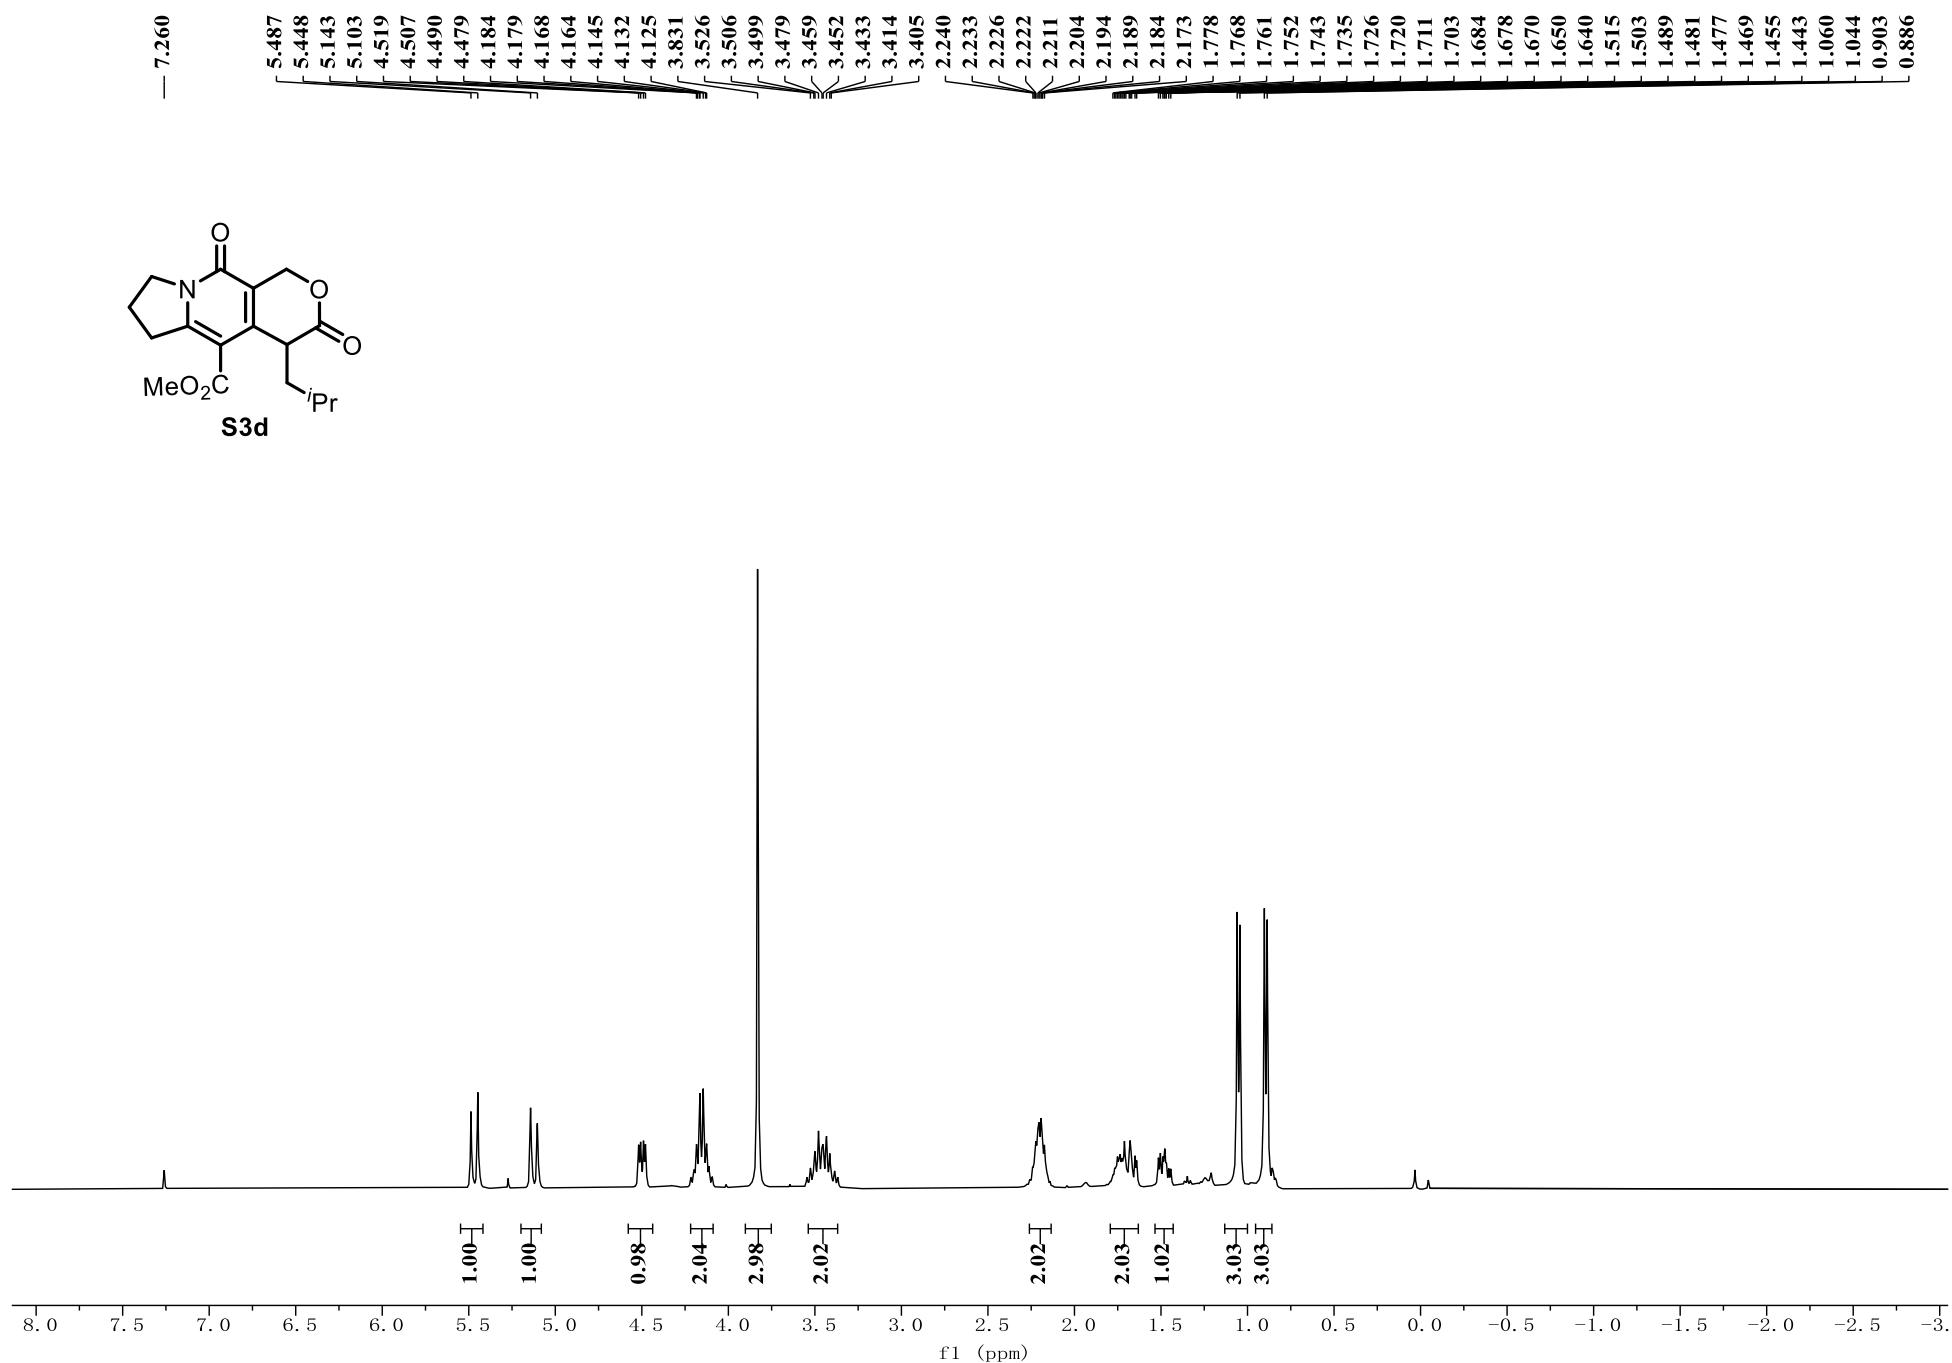

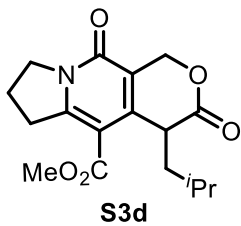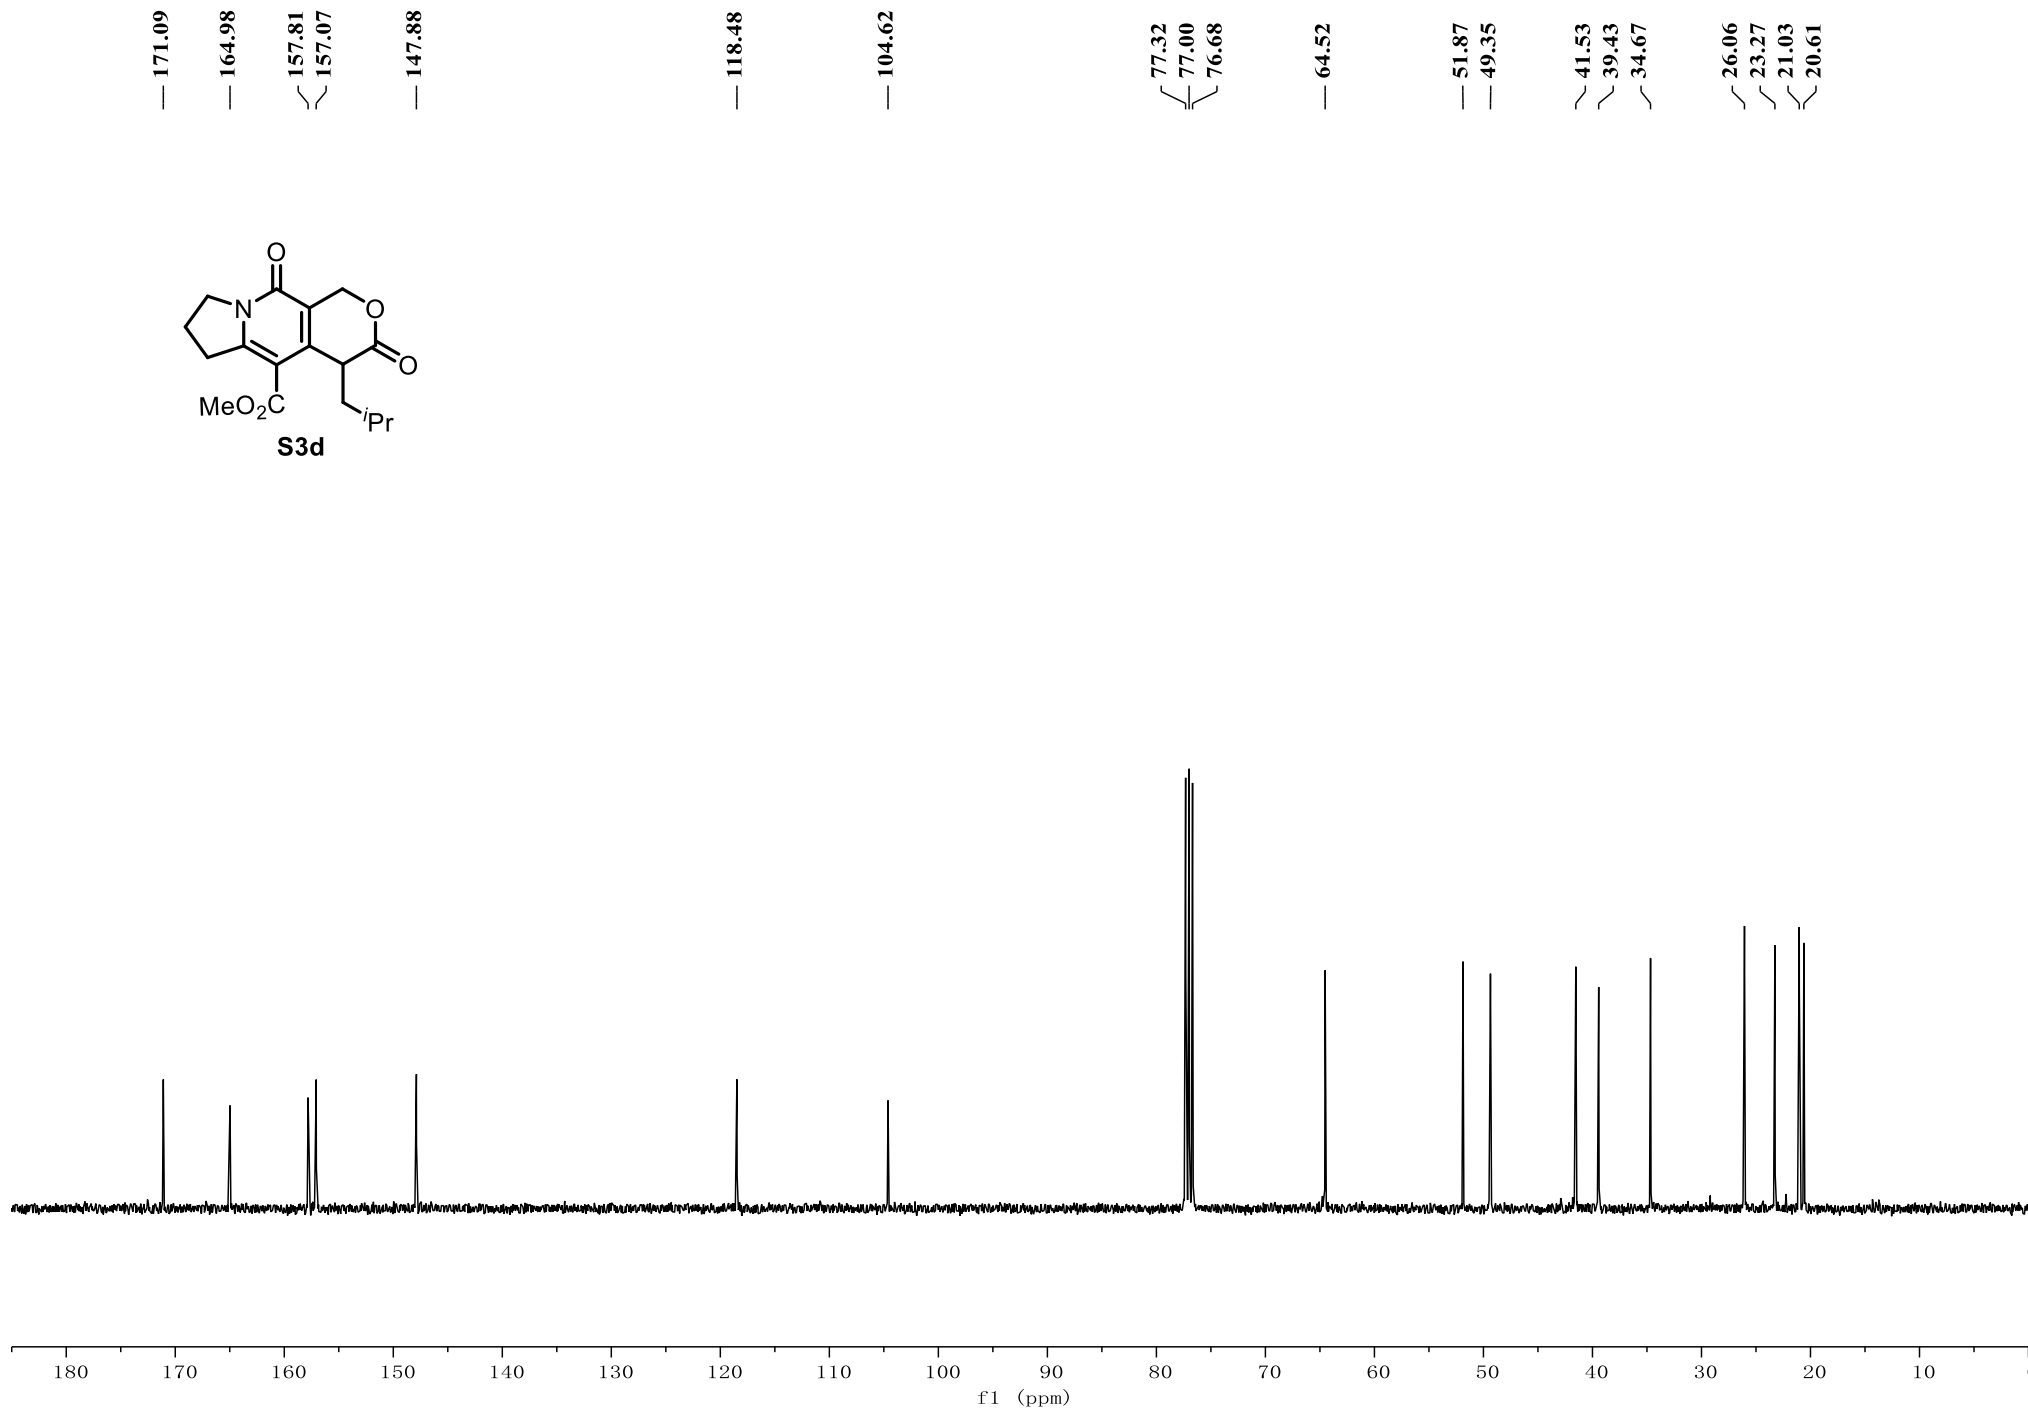

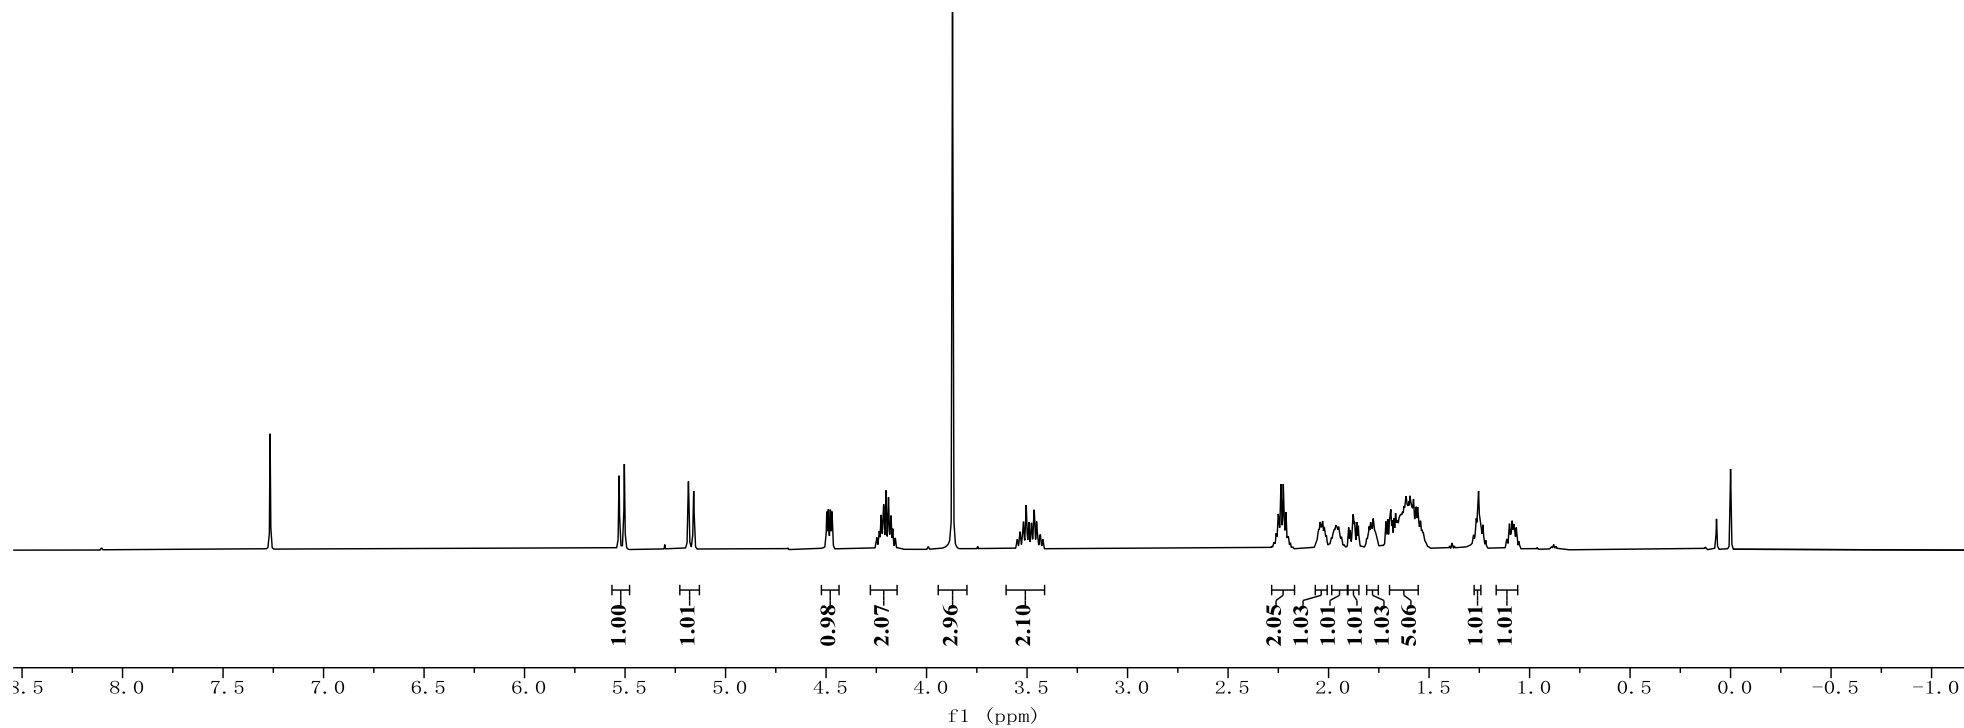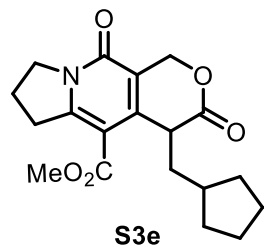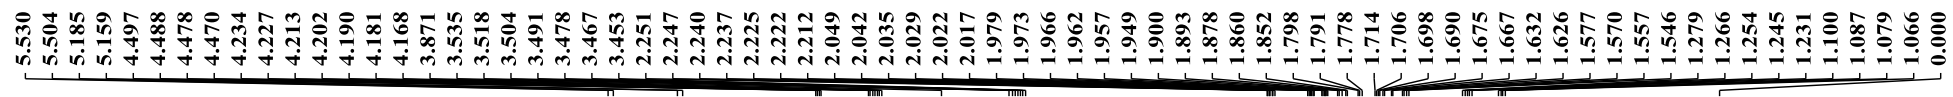

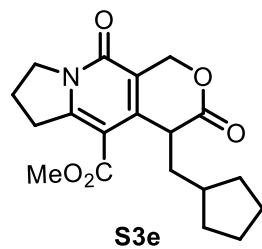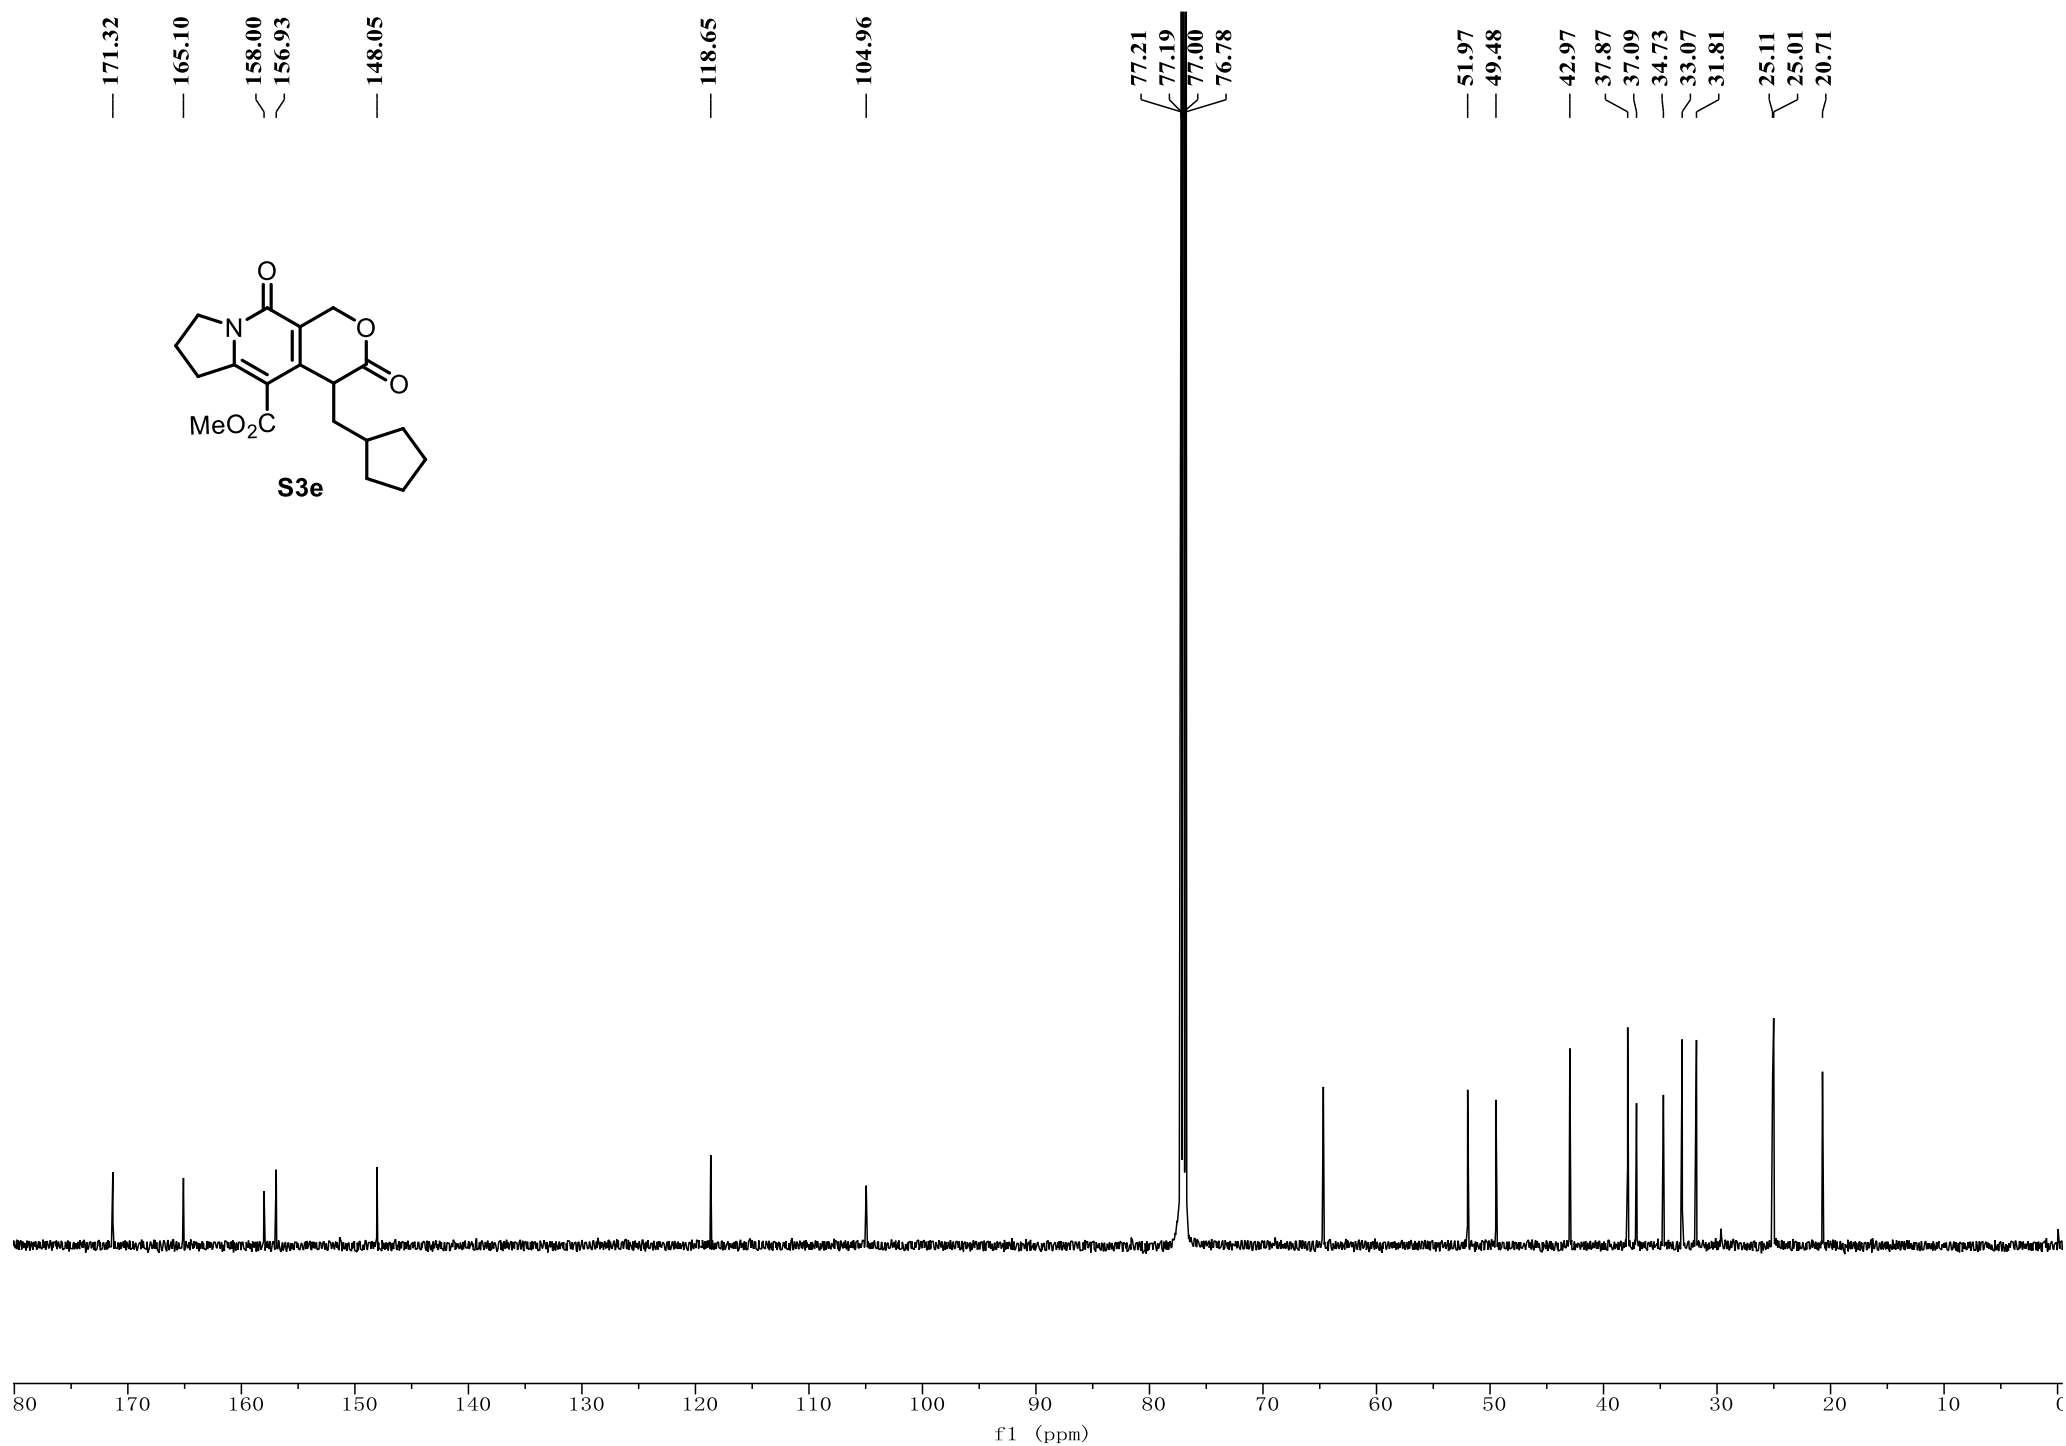

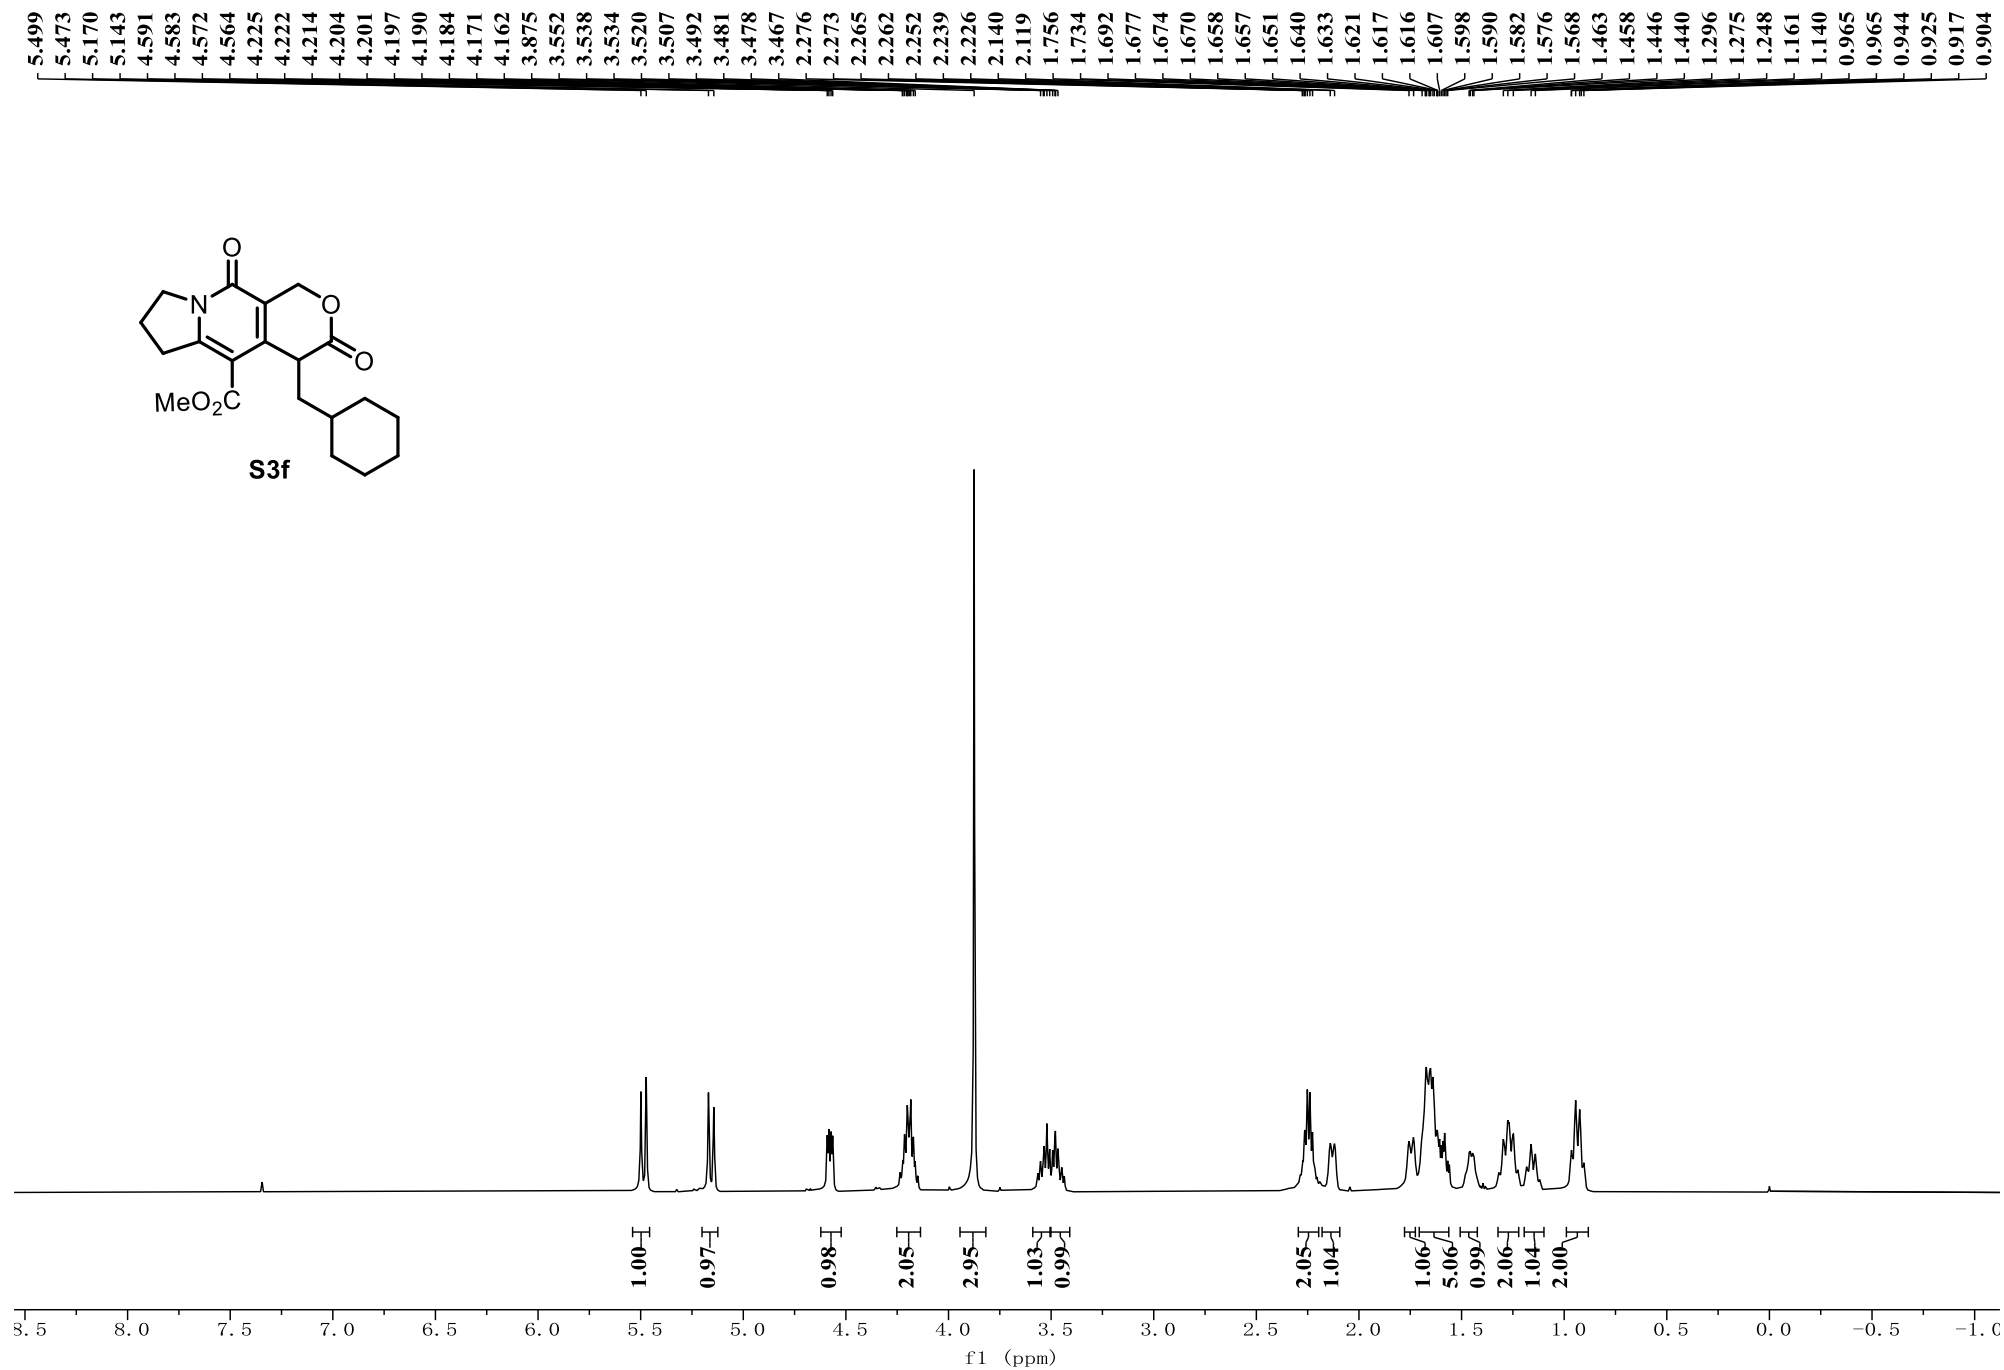

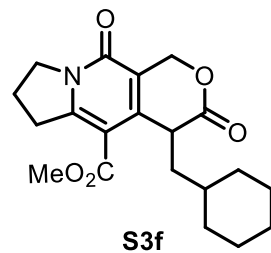

— 171.00  
 — 164.84  
 157.67  
 156.90  
 — 147.91  
  
 — 118.34  
  
 — 104.49  
  
 77.21  
 77.00  
 76.79  
  
 — 64.37  
  
 — 51.72  
 — 49.23  
  
 40.61  
 38.05  
 35.03  
 34.56  
 33.71  
 31.69  
 26.17  
 25.89  
 25.67  
 20.48

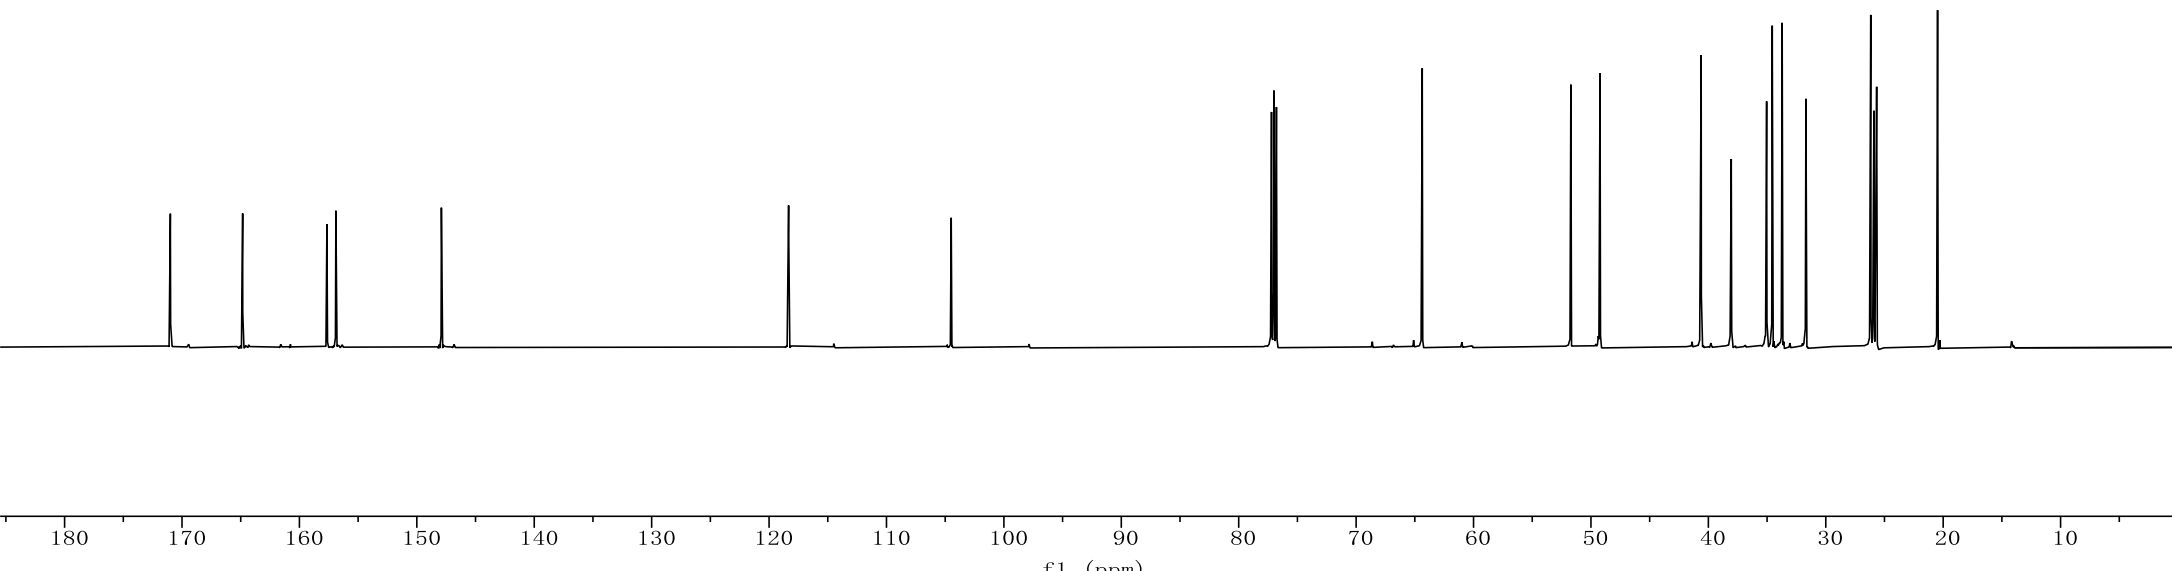

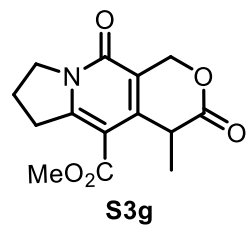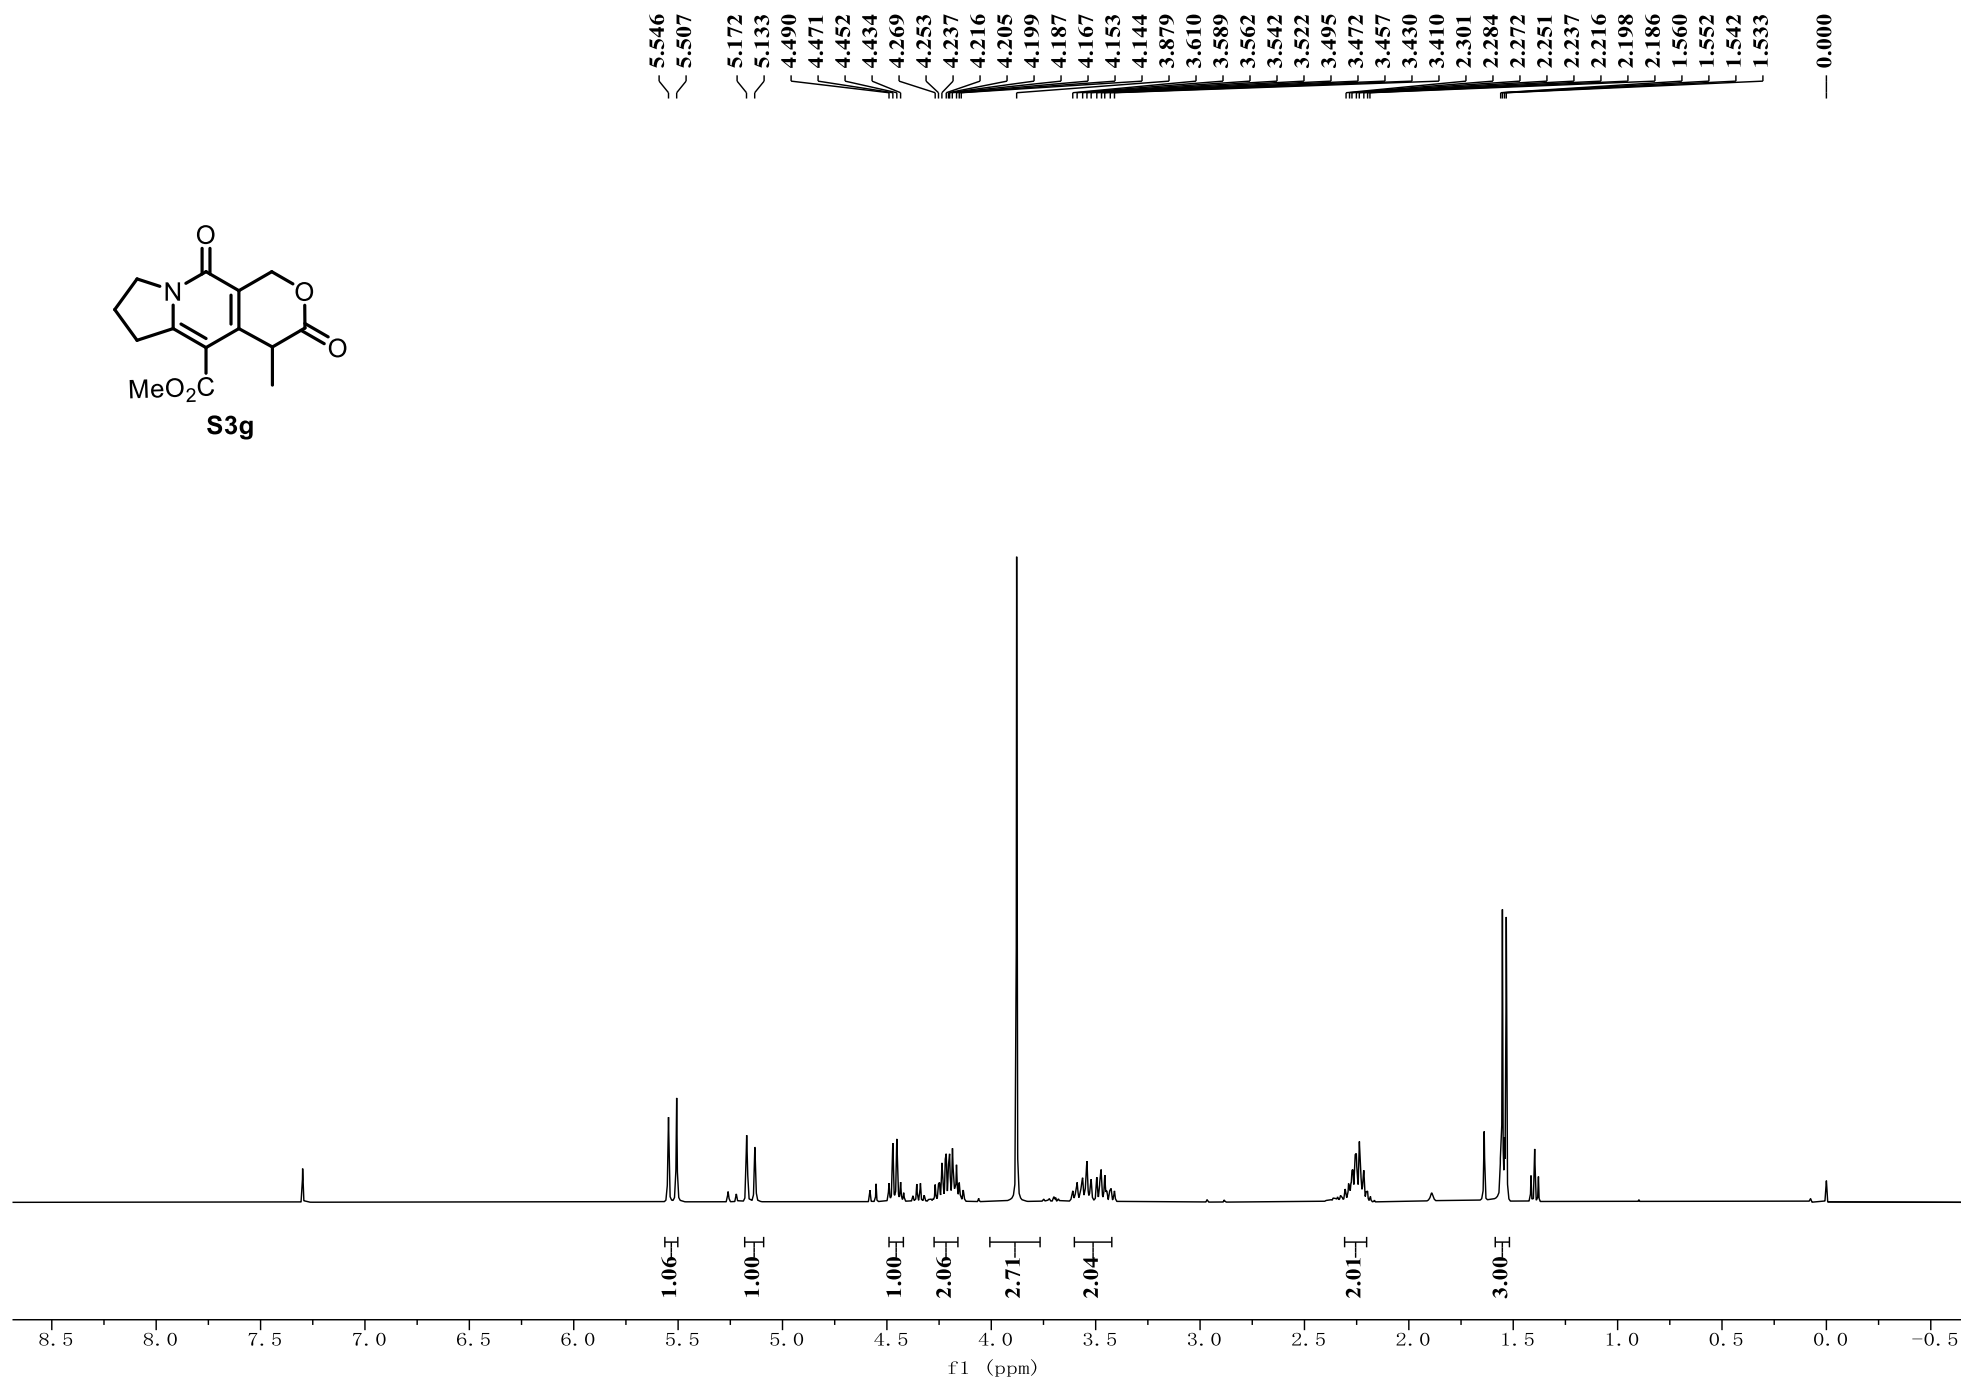

— 173.28  
— 165.63  
— 158.51  
— 157.13  
— 149.17

— 118.00  
— 104.52

77.32  
77.00  
76.68

— 64.48

— 51.90  
— 49.51

— 37.86  
— 34.75

— 20.59  
— 16.92

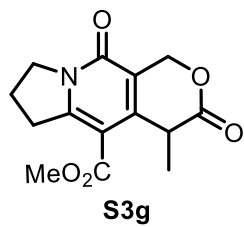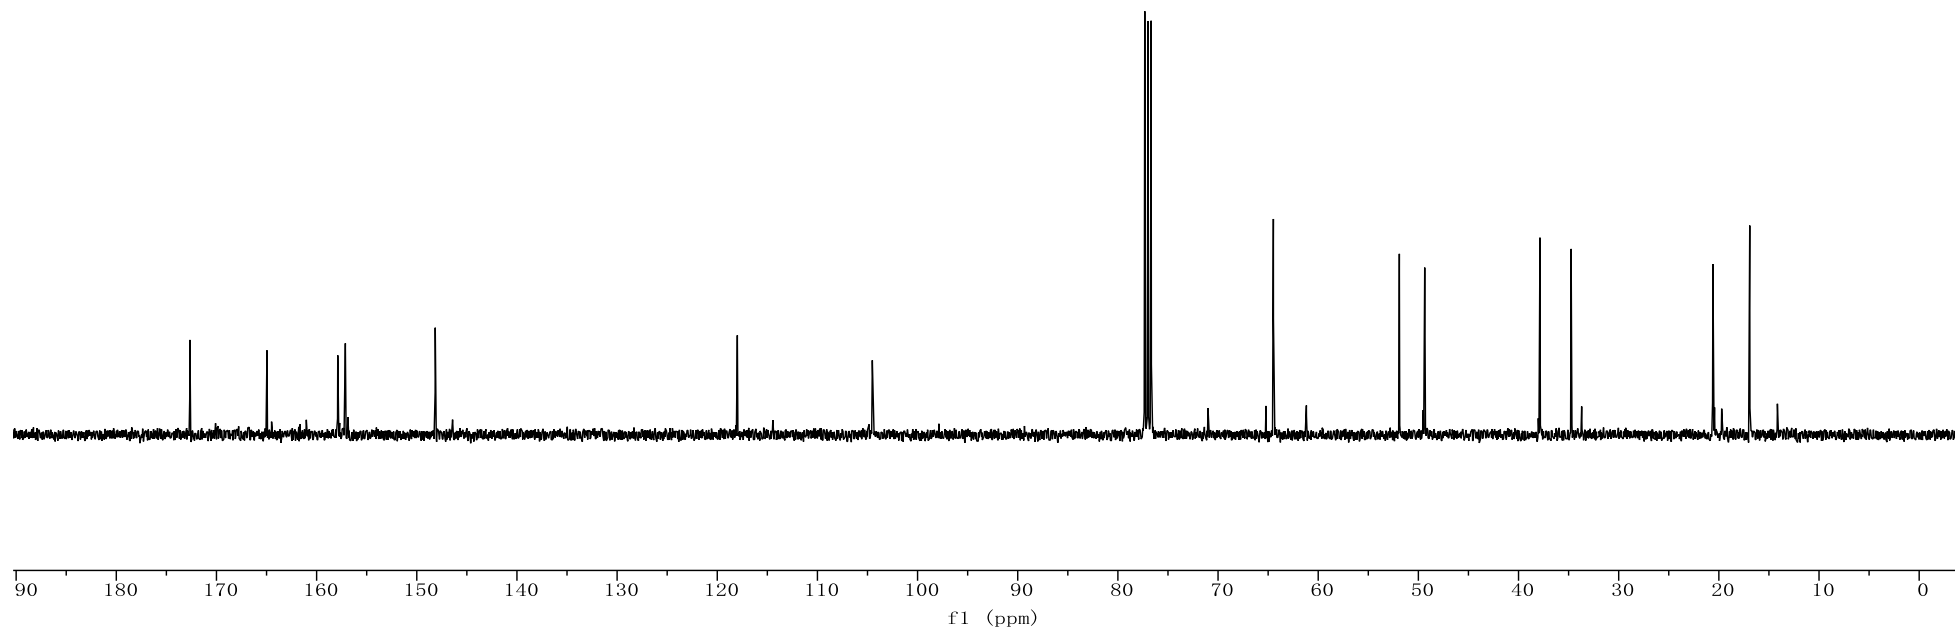

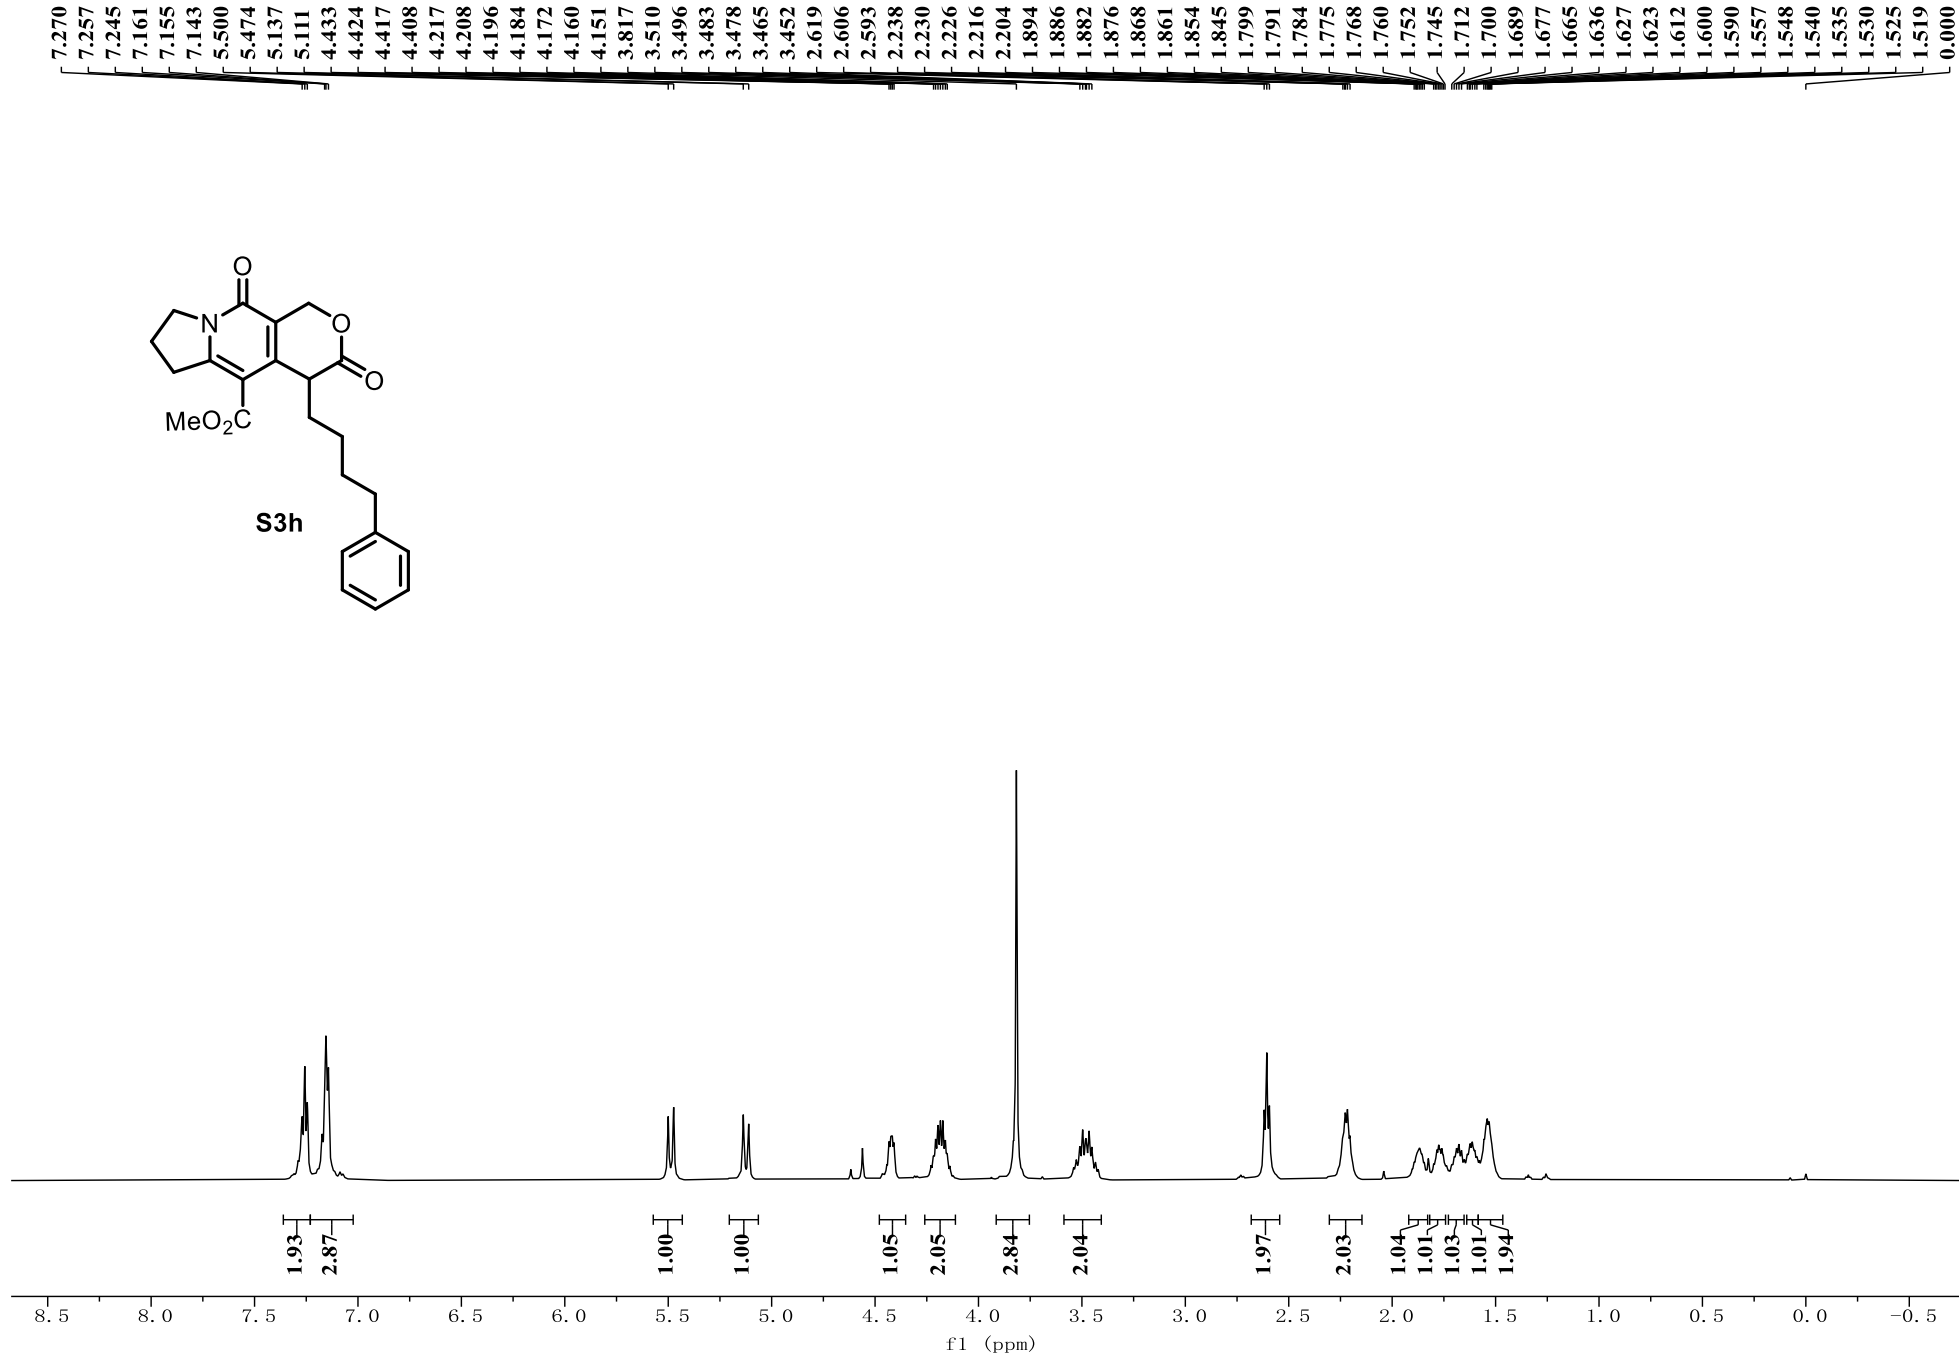

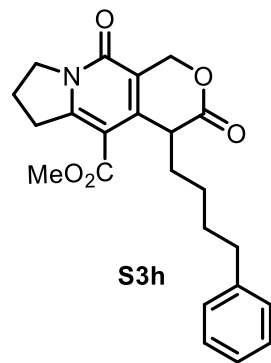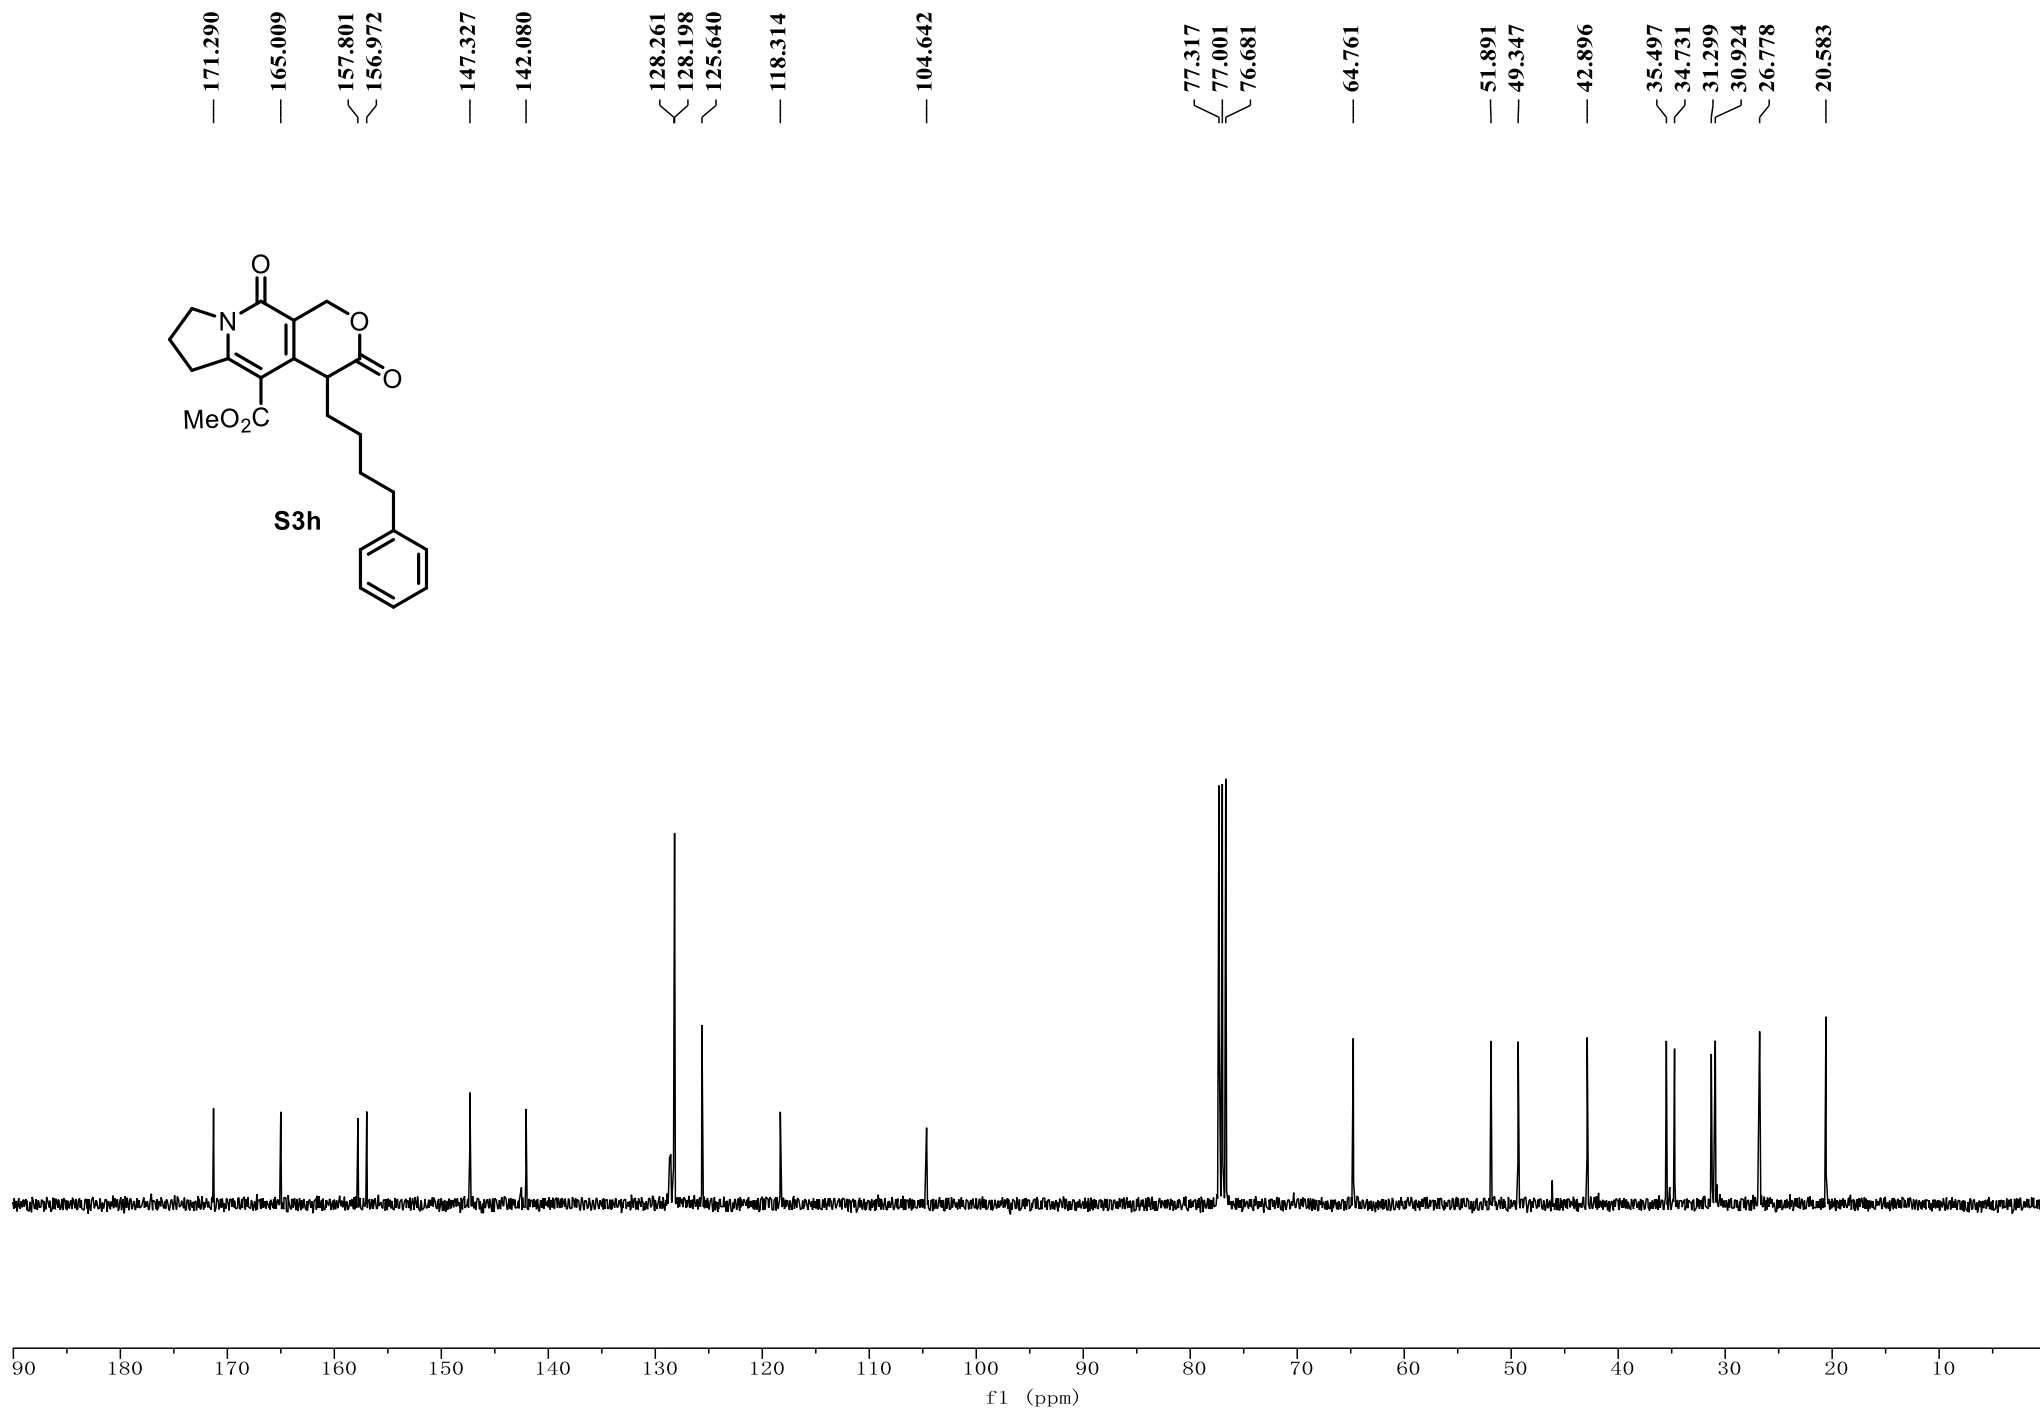

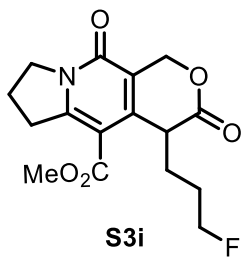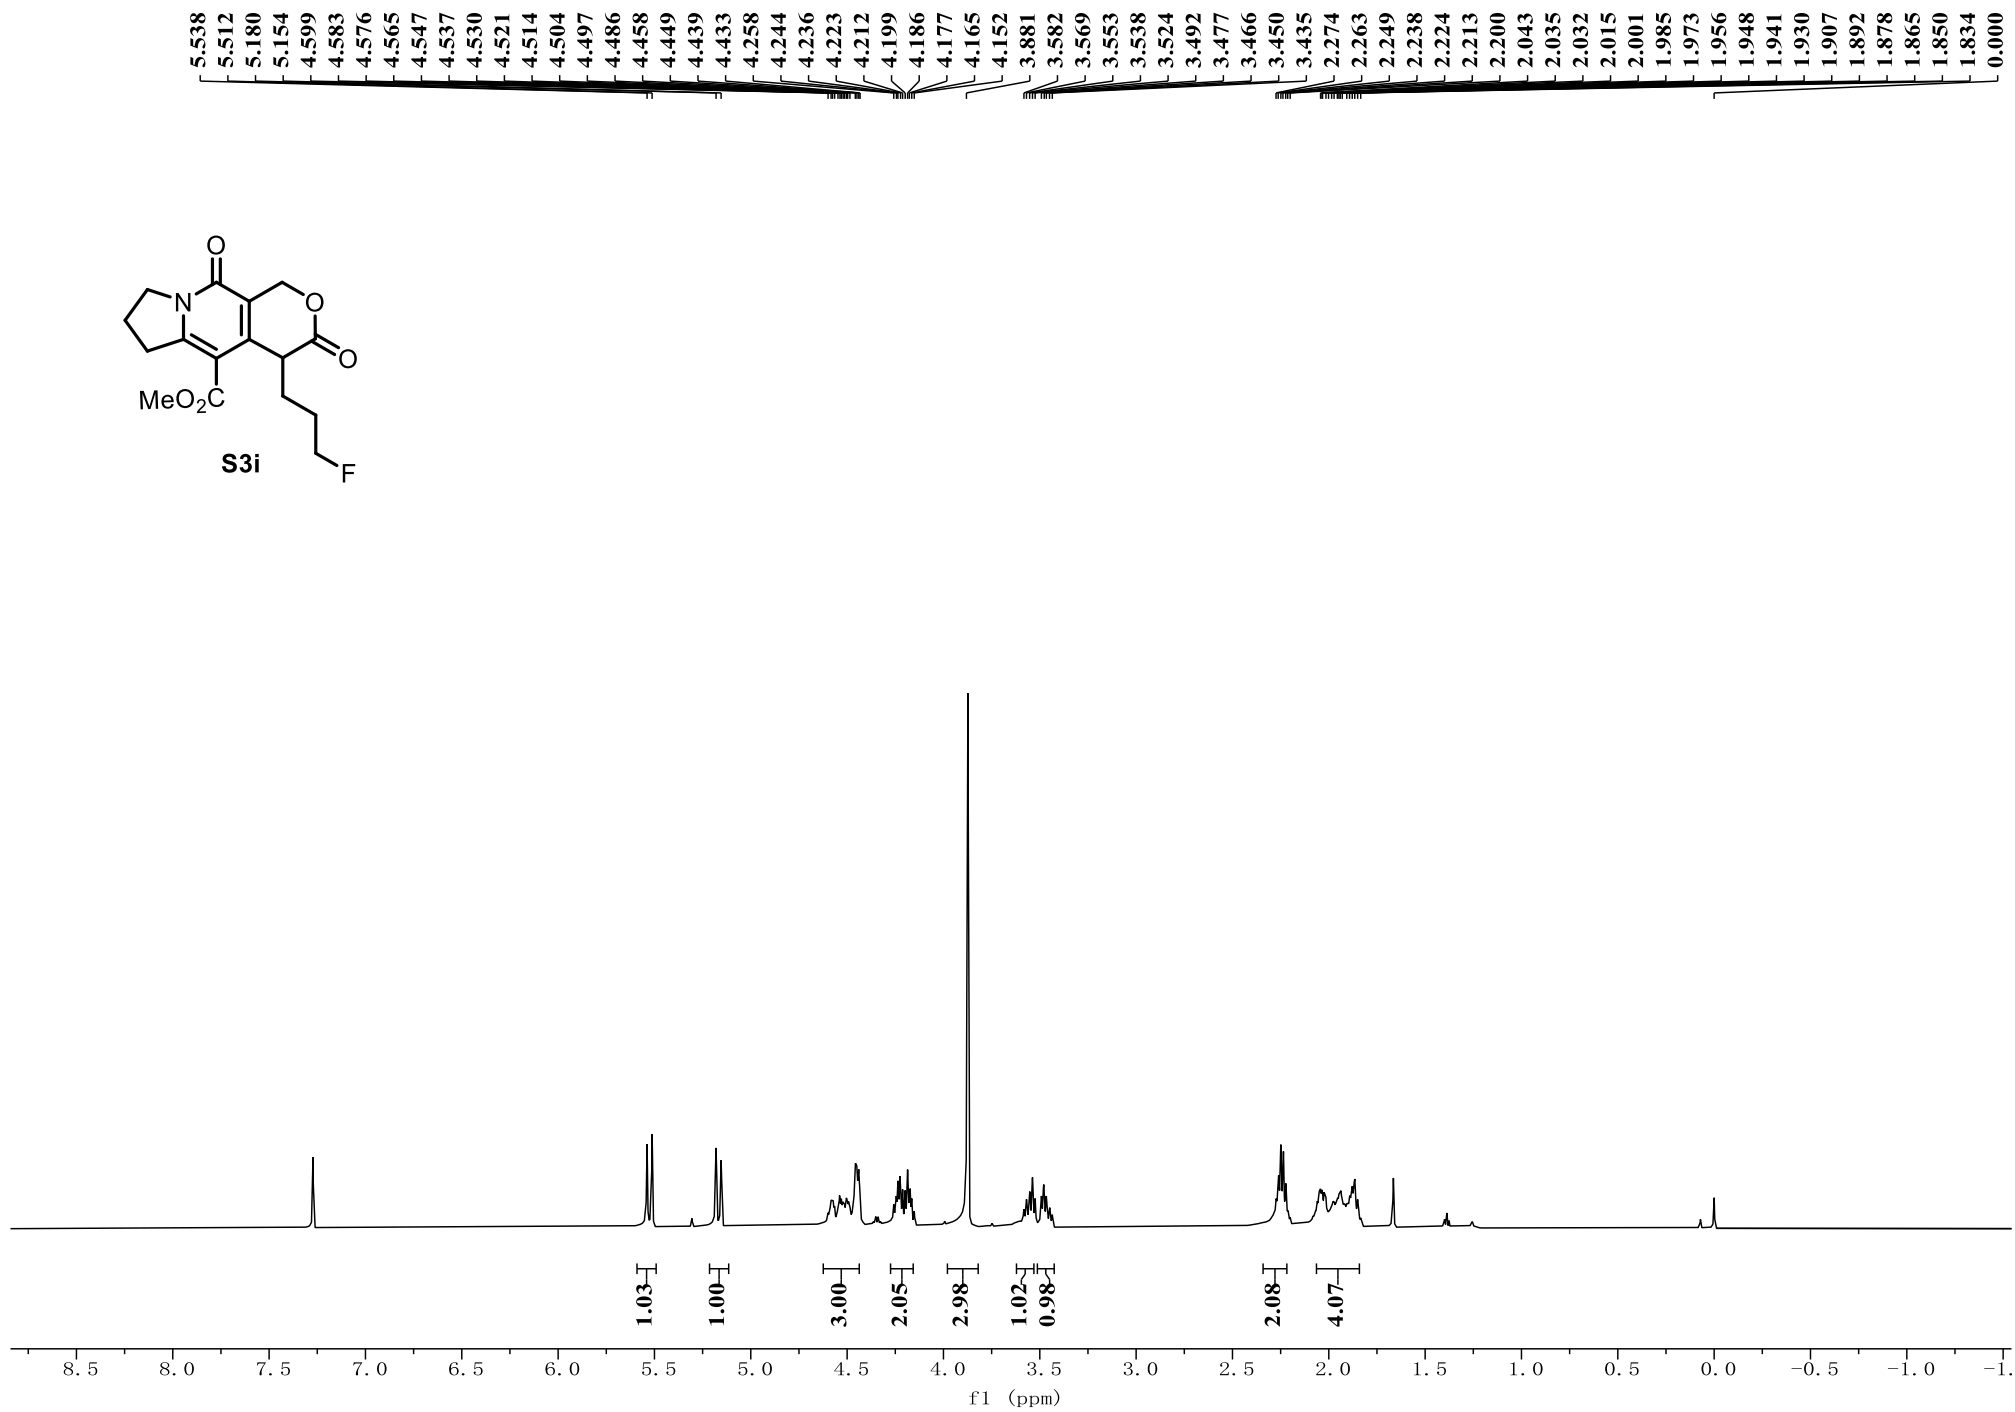

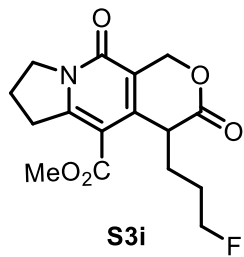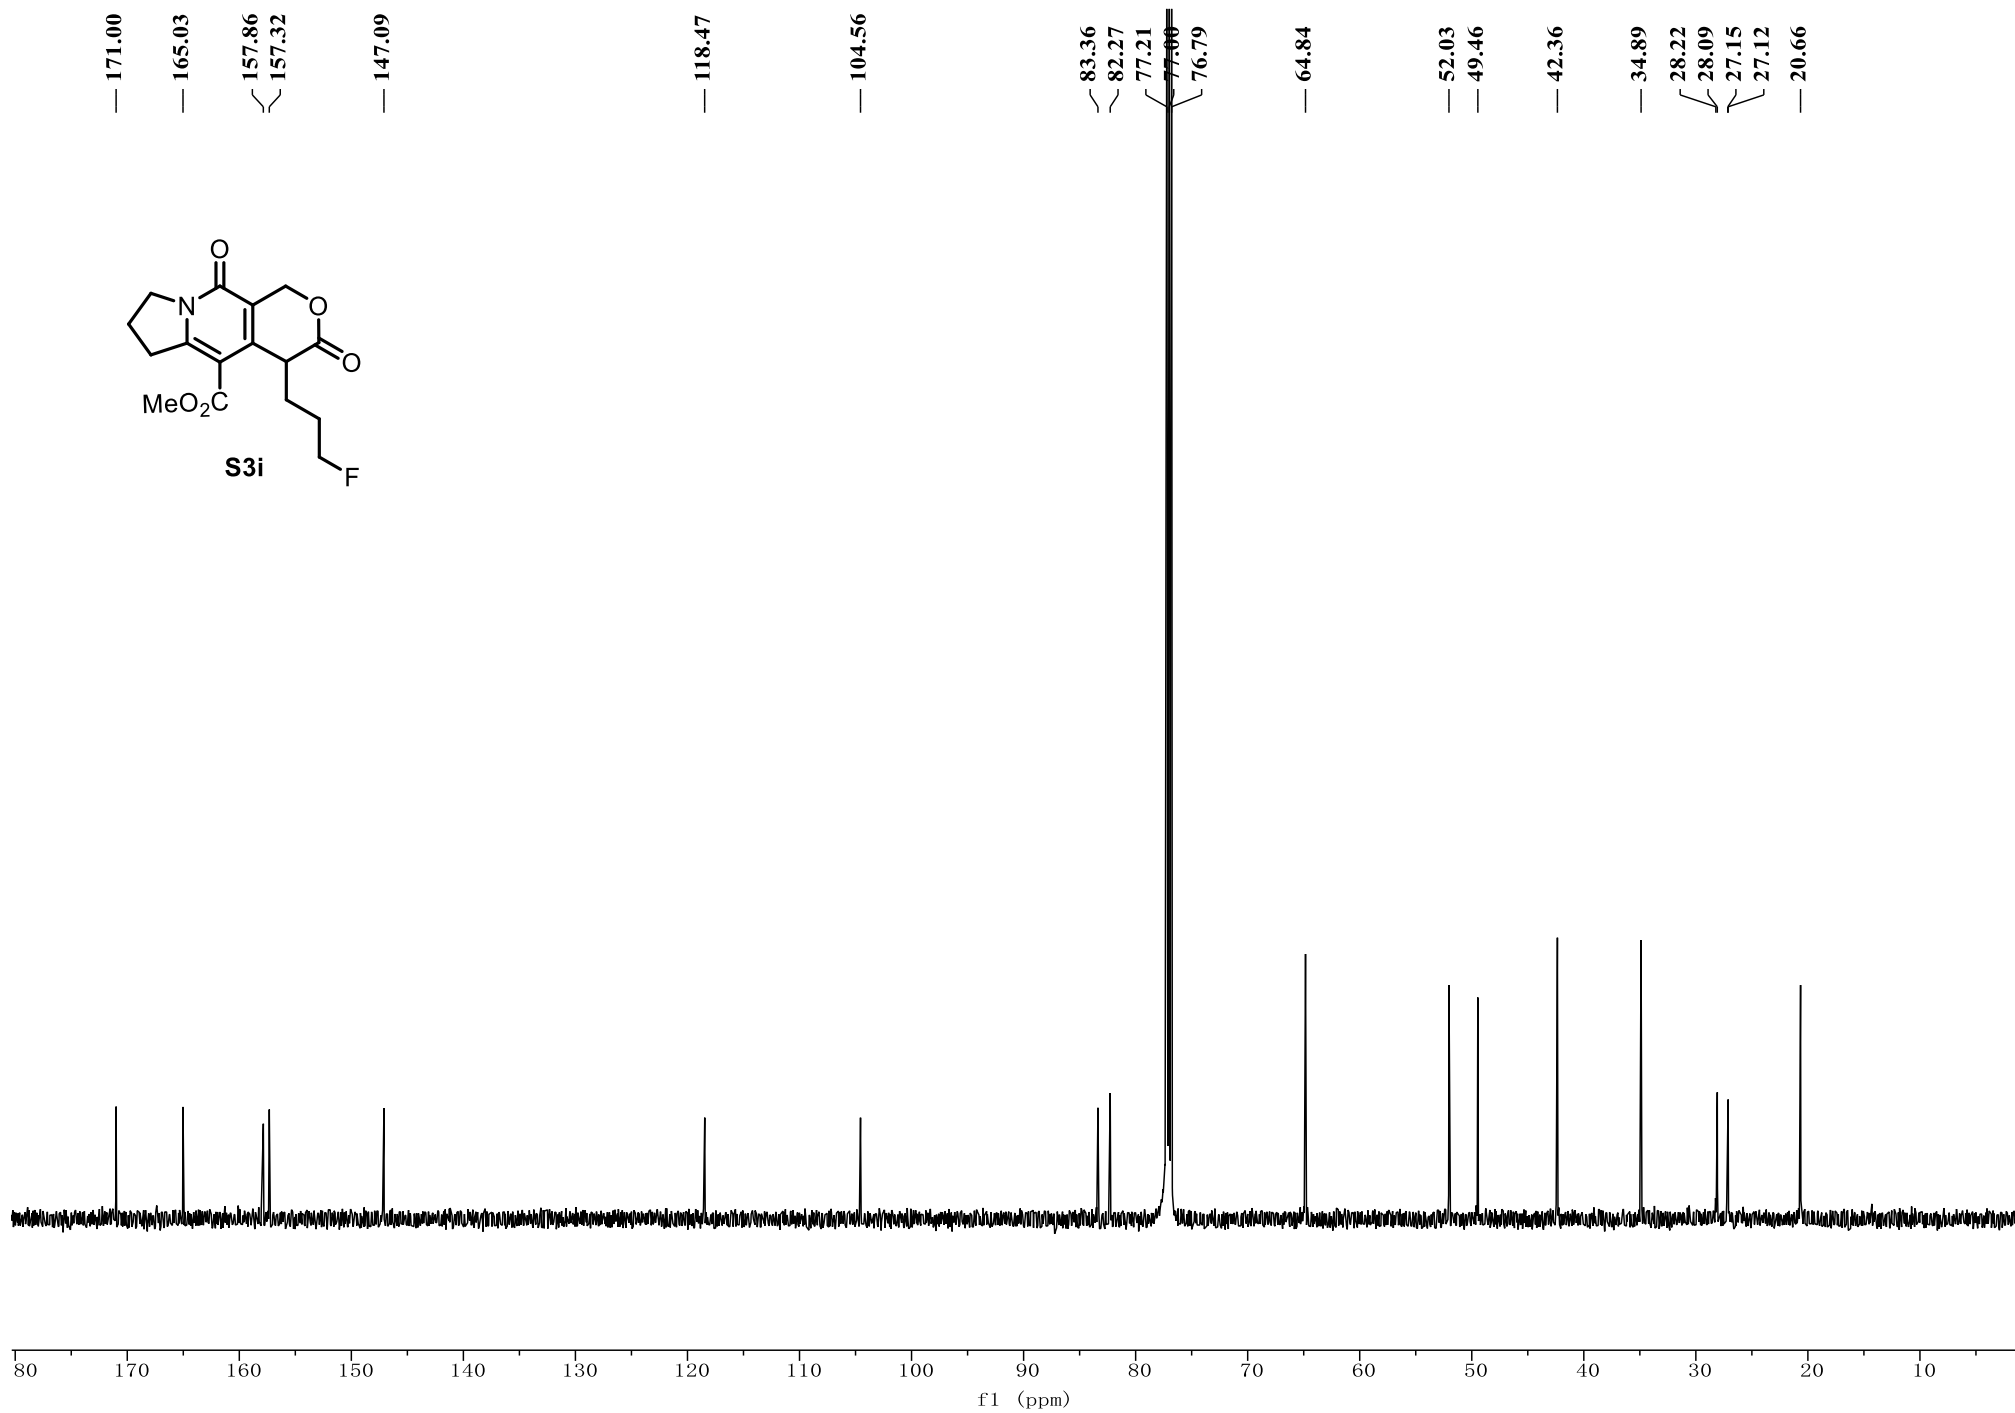

— 16.69

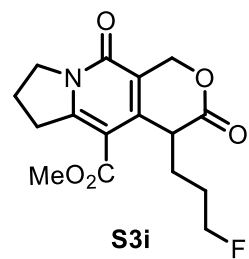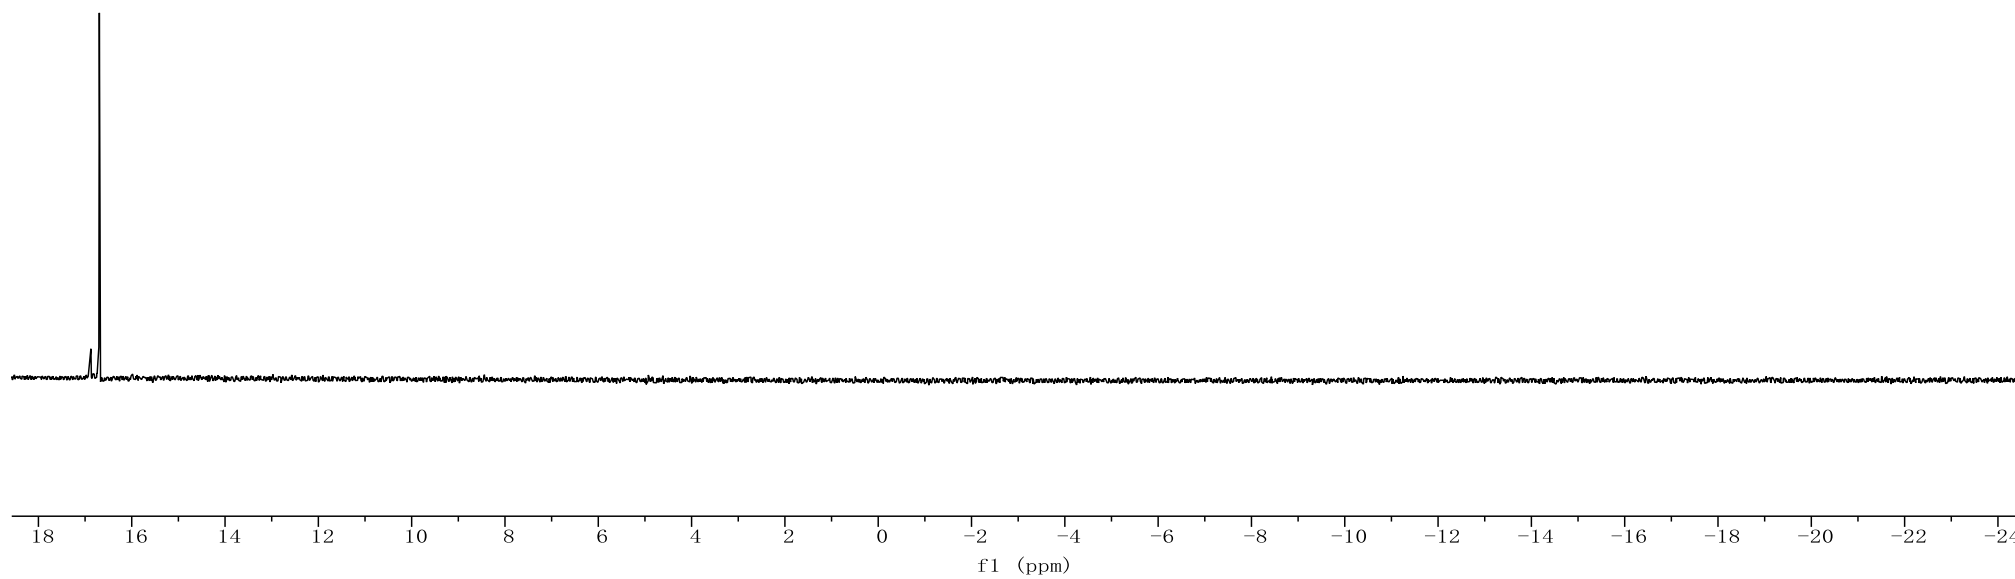

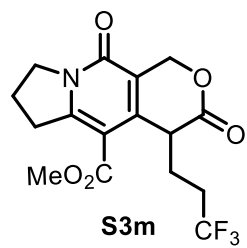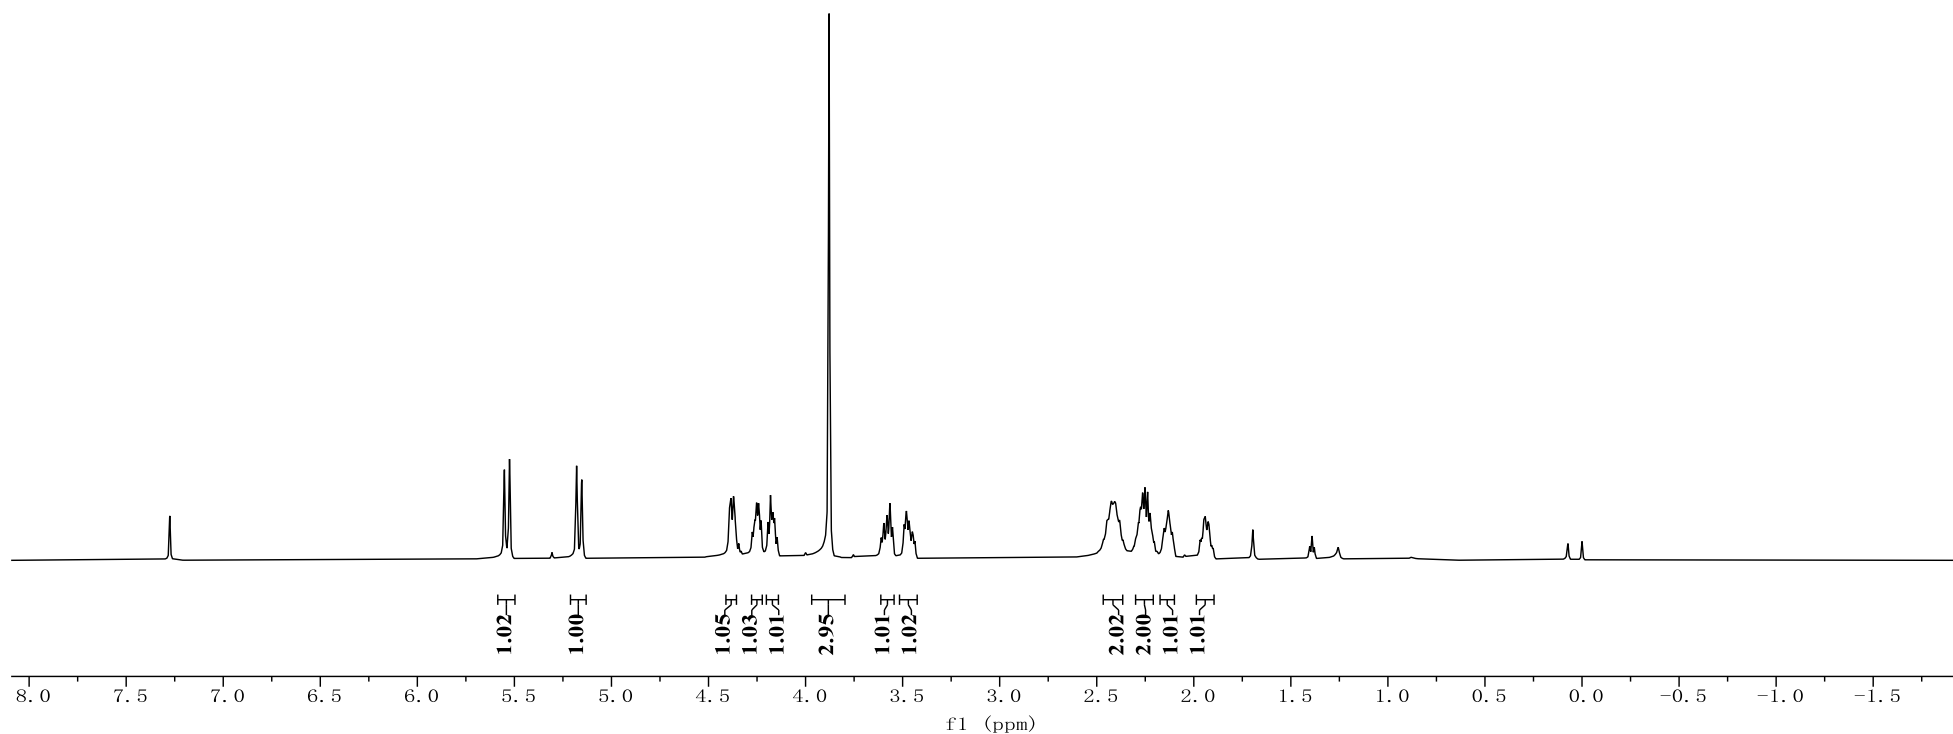

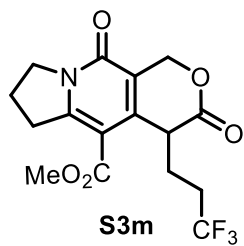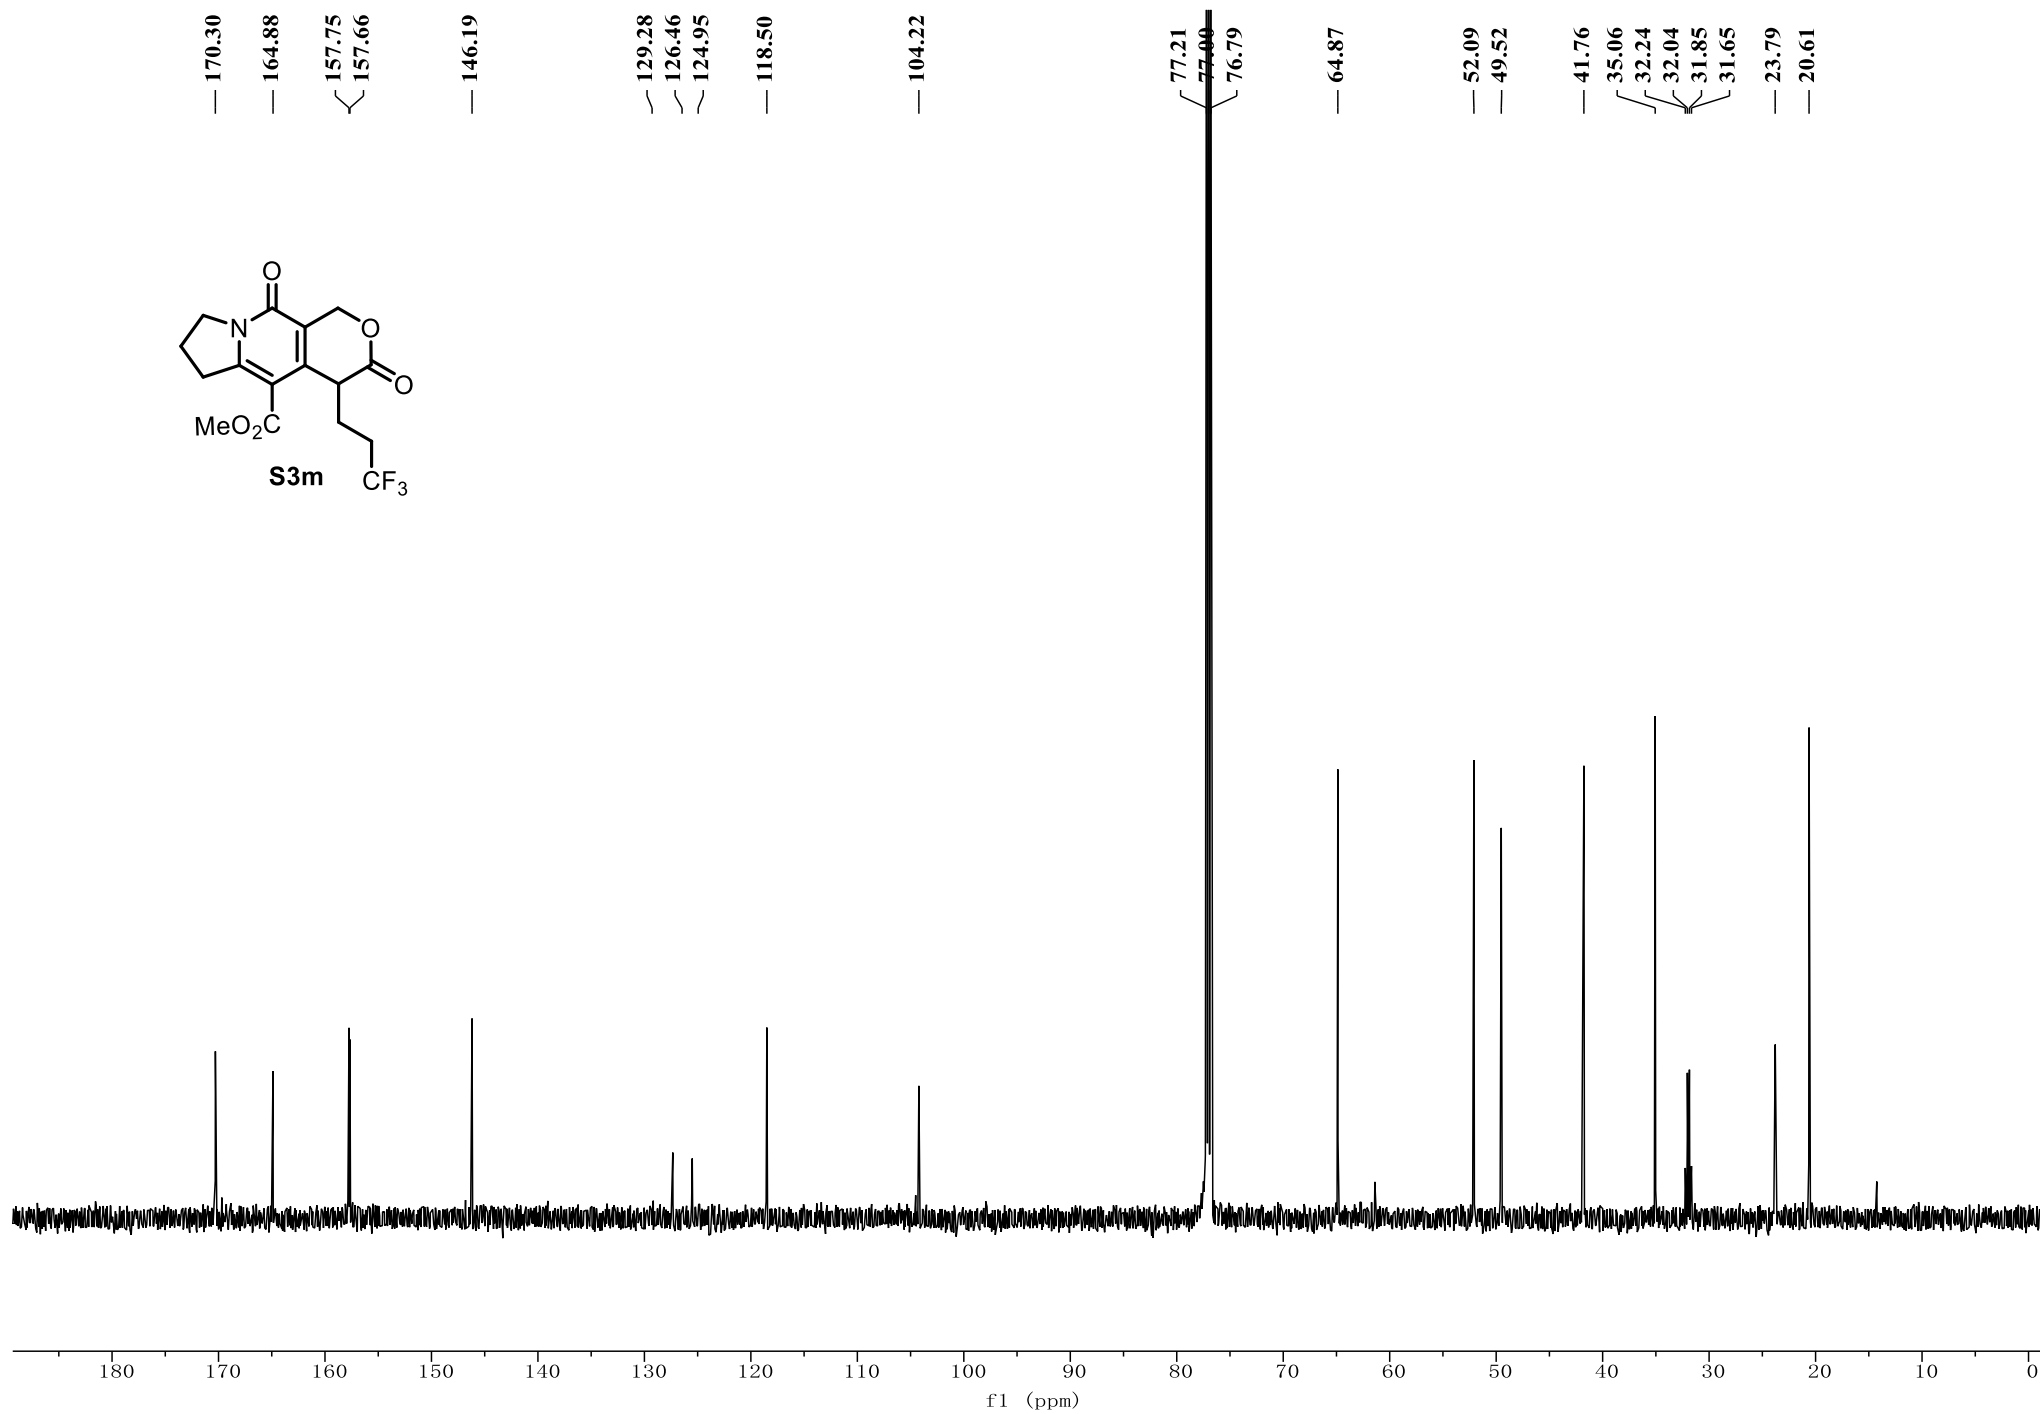

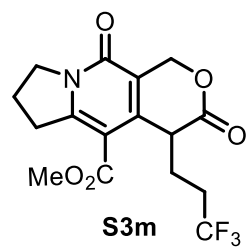

— -66.57

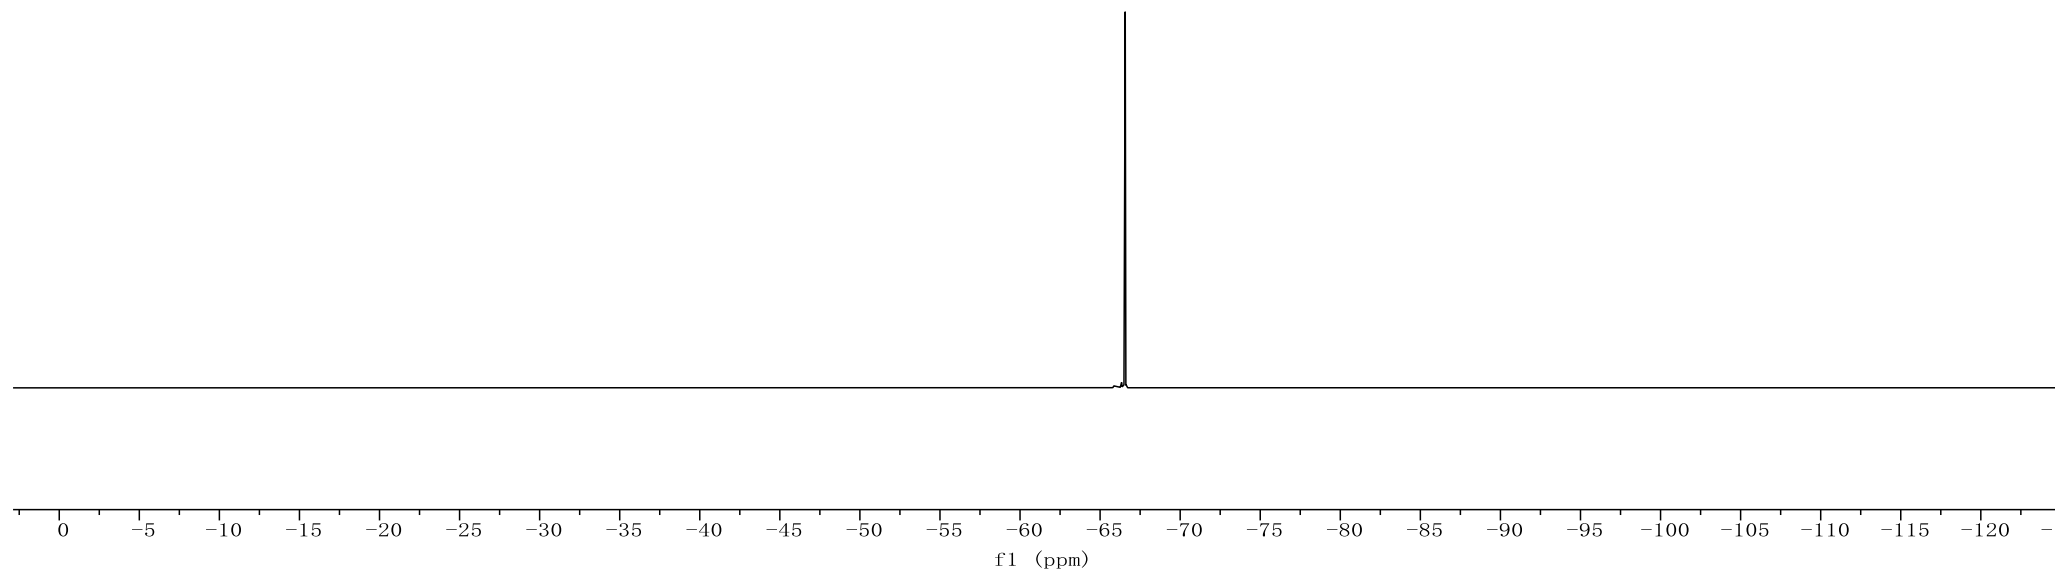

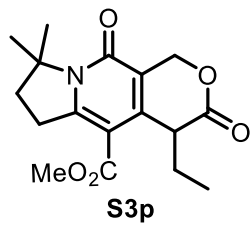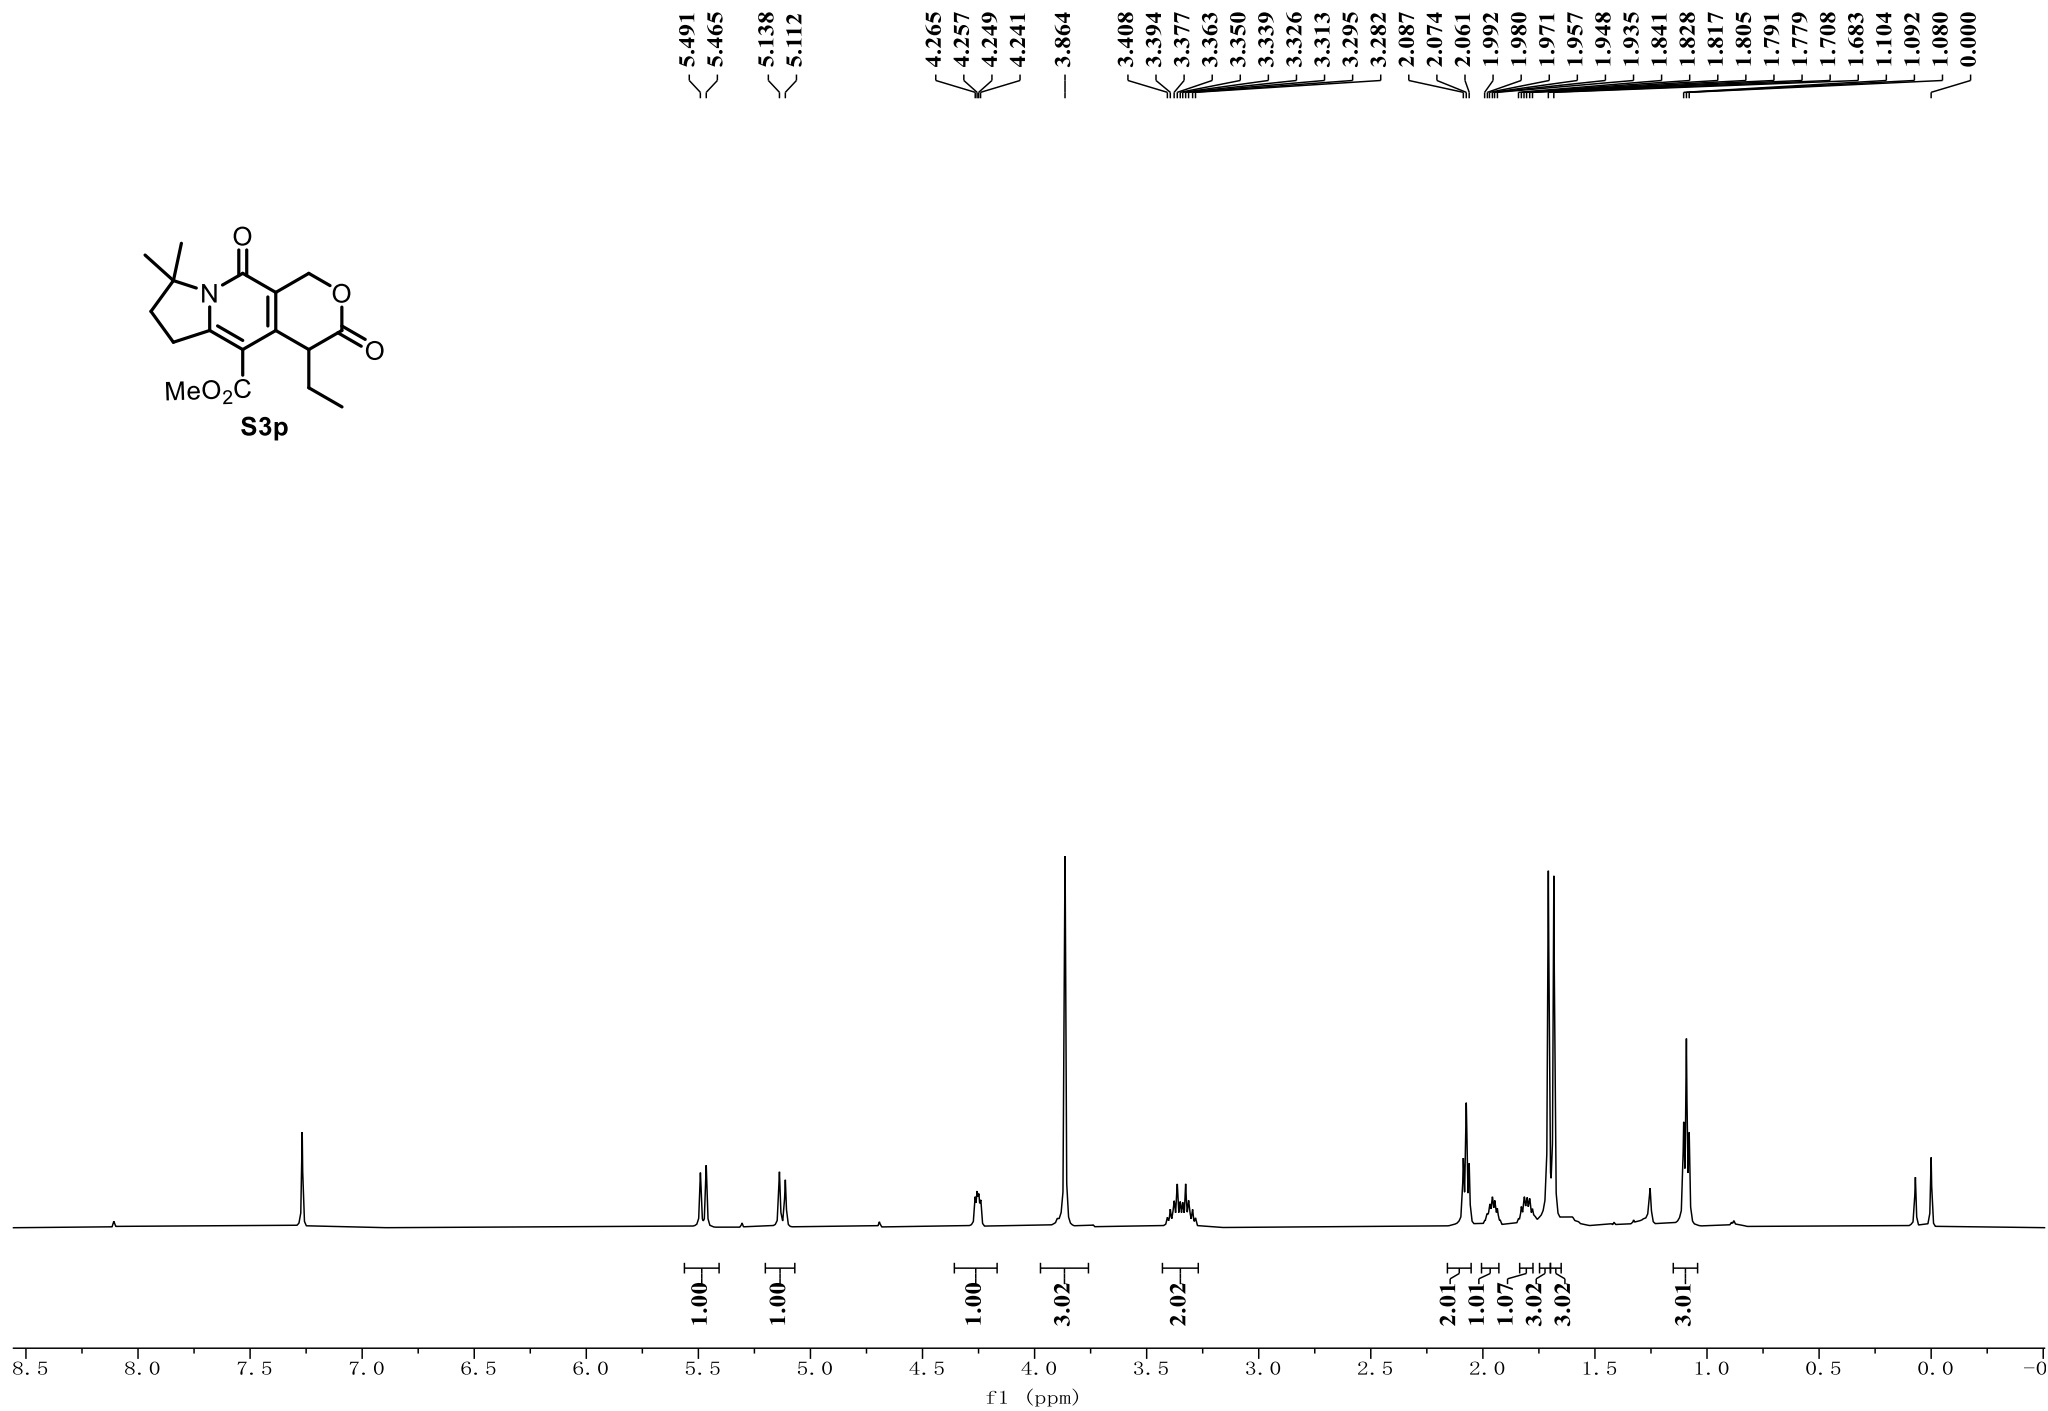

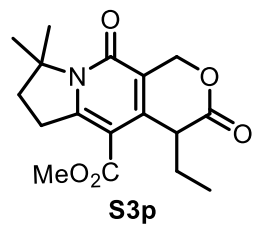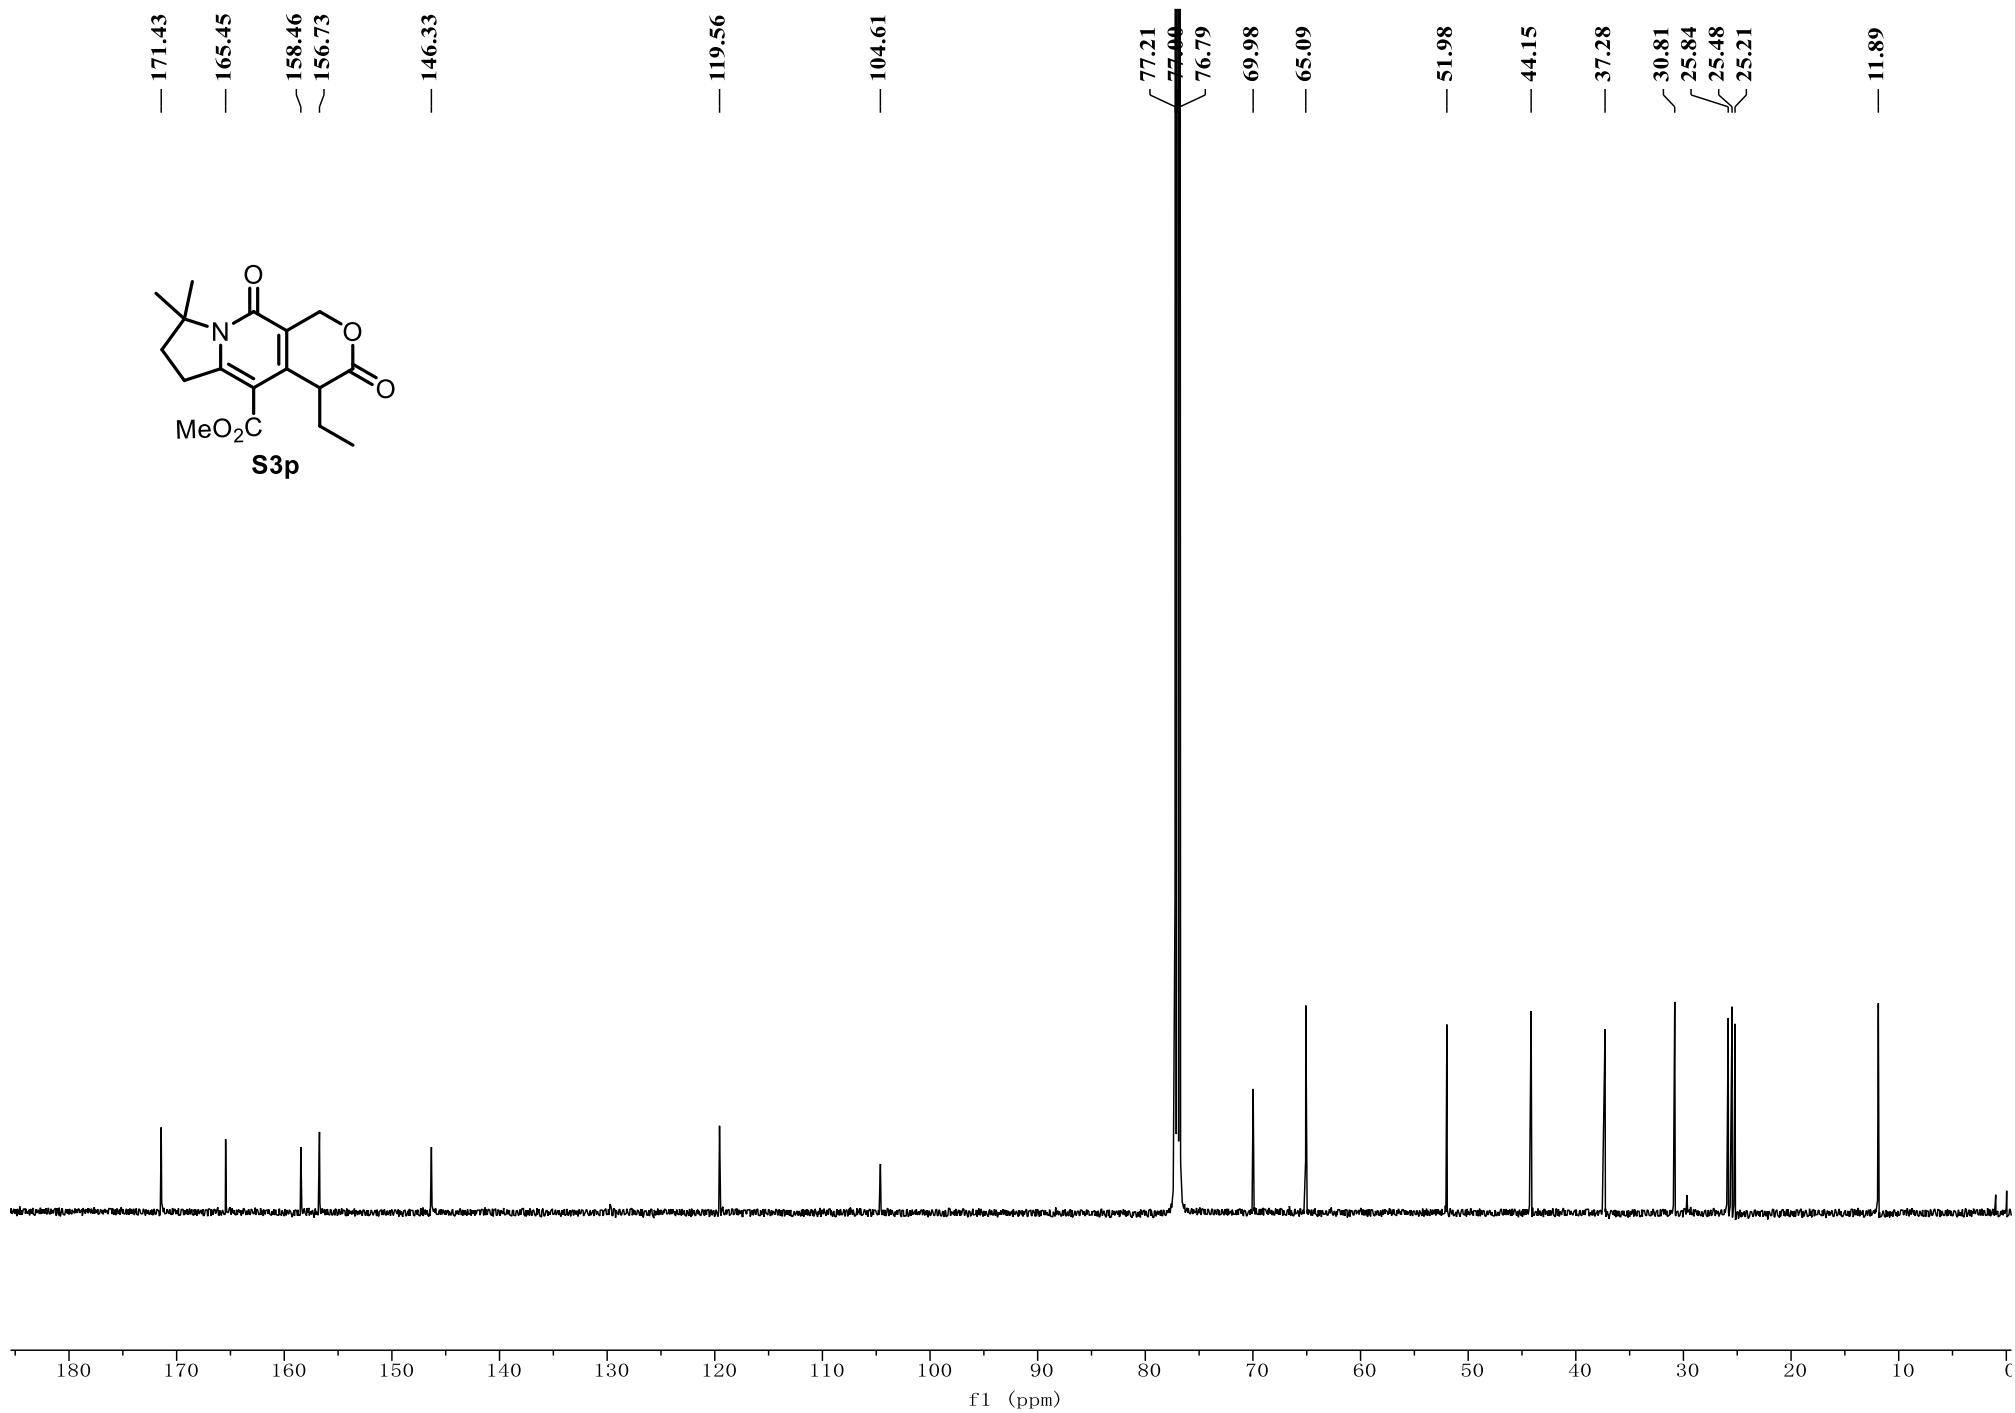

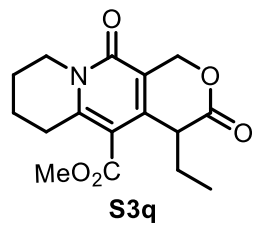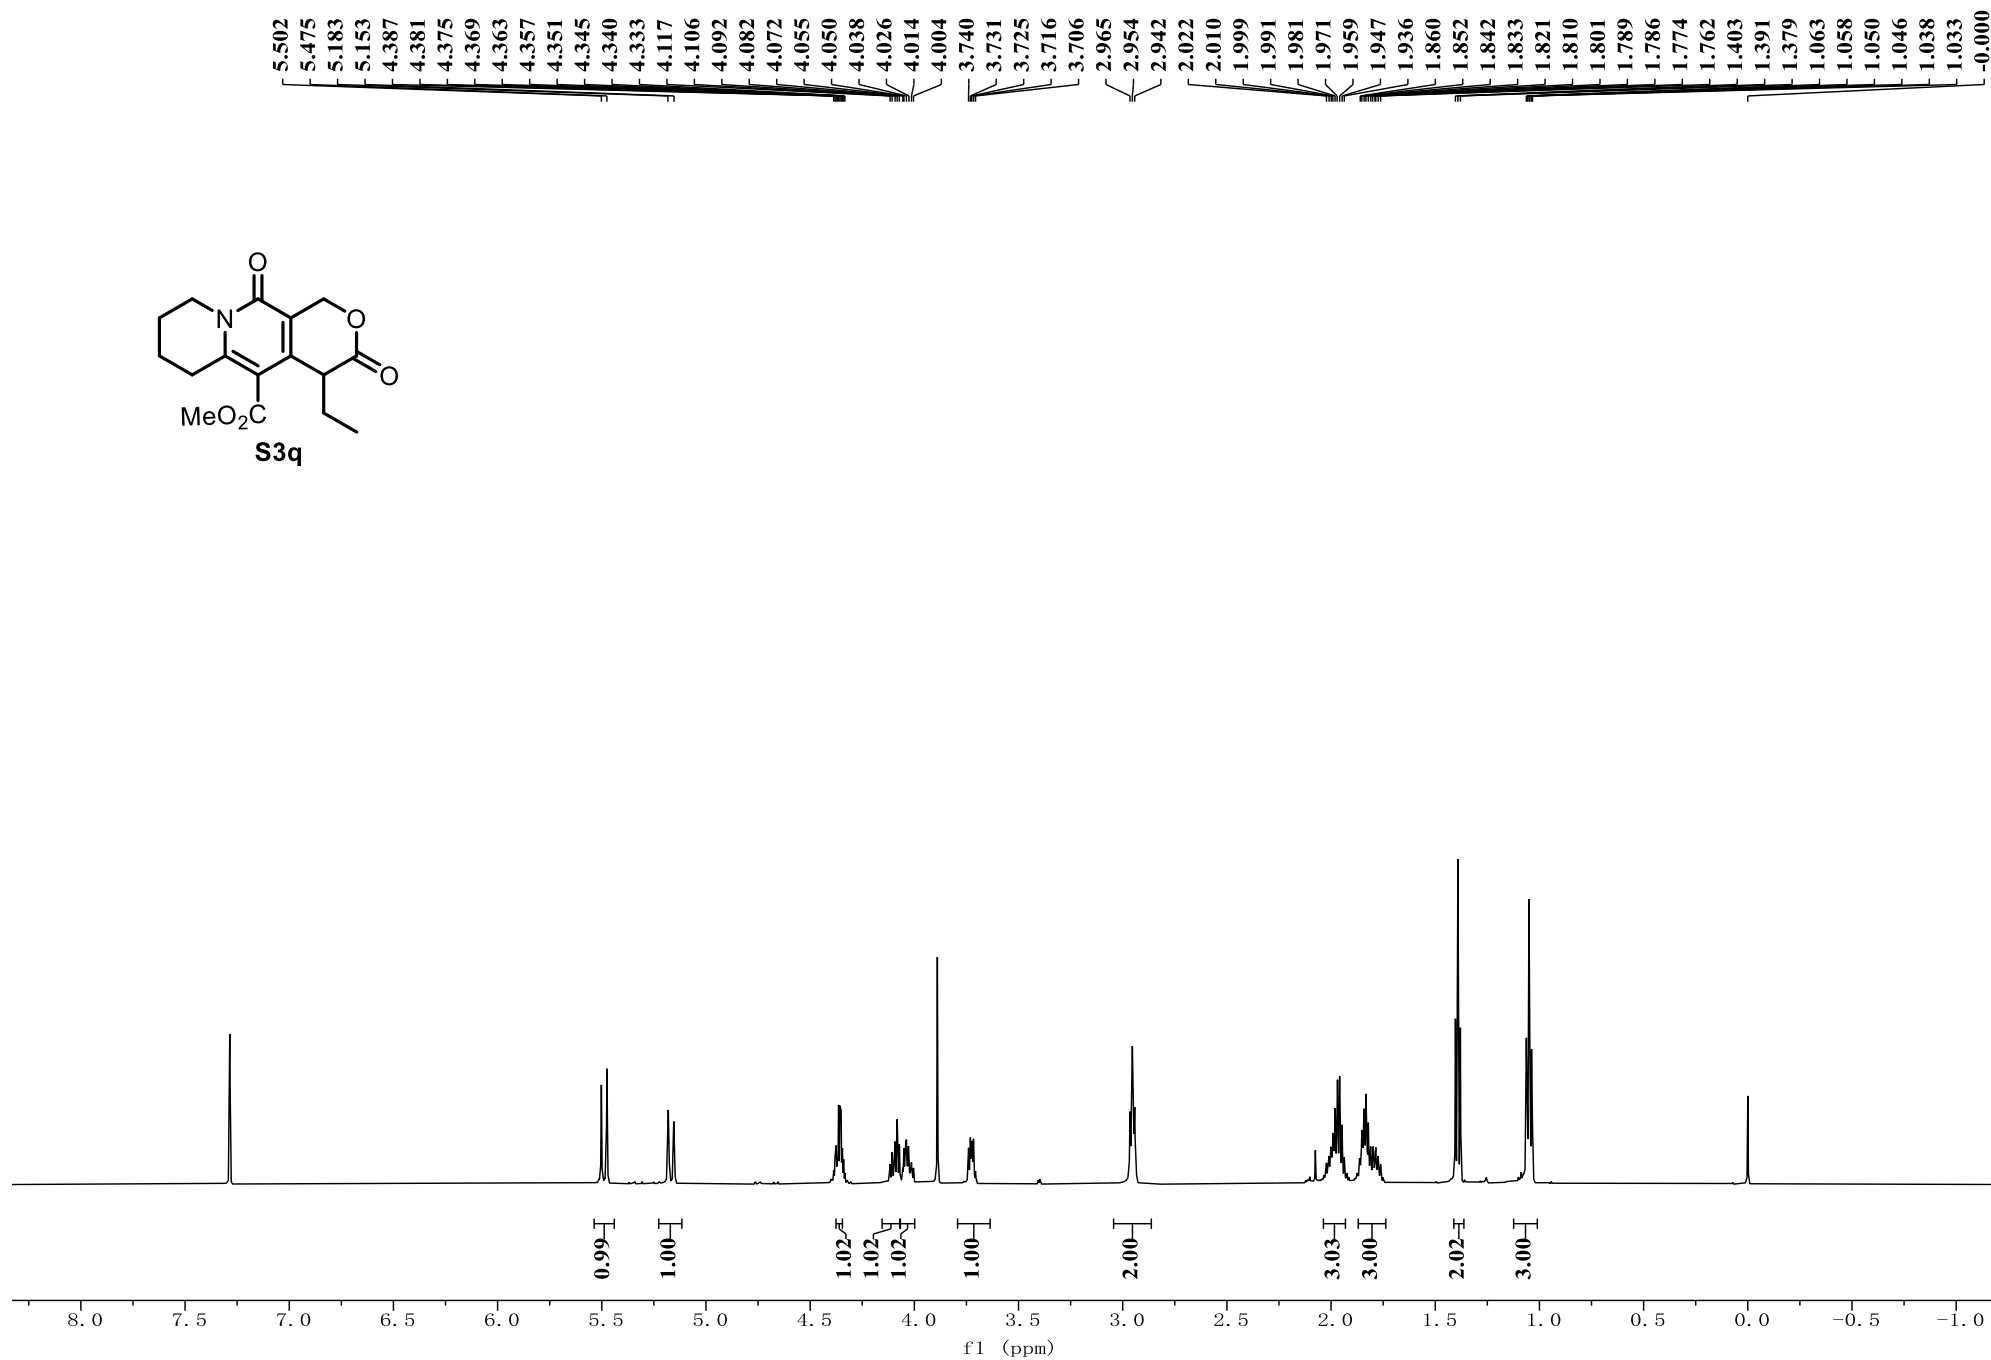

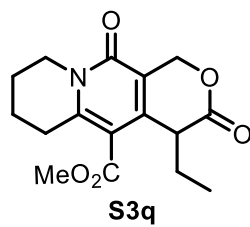

— 170.78  
 — 166.94  
 — 165.89  
 — 158.81  
 — 150.99  
 — 149.56  
 — 143.58

— 116.89  
 — 109.99  
 — 108.34

77.21  
 77.00  
 76.79

— 65.75  
 — 61.77

— 52.43

— 44.09  
 — 42.03

27.01  
 25.41  
 21.22  
 18.55  
 14.11  
 10.34

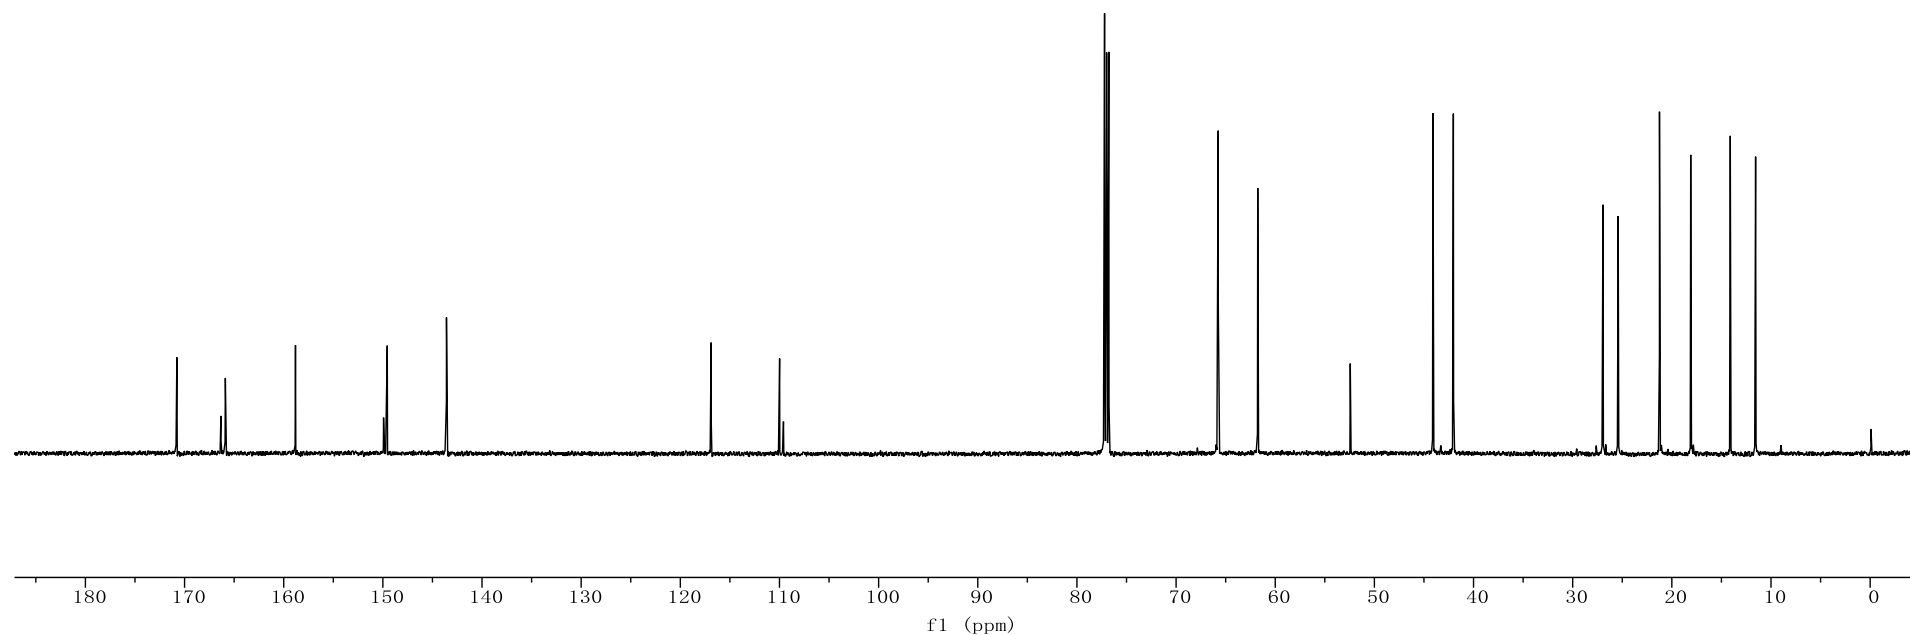

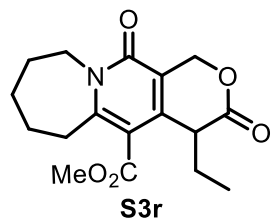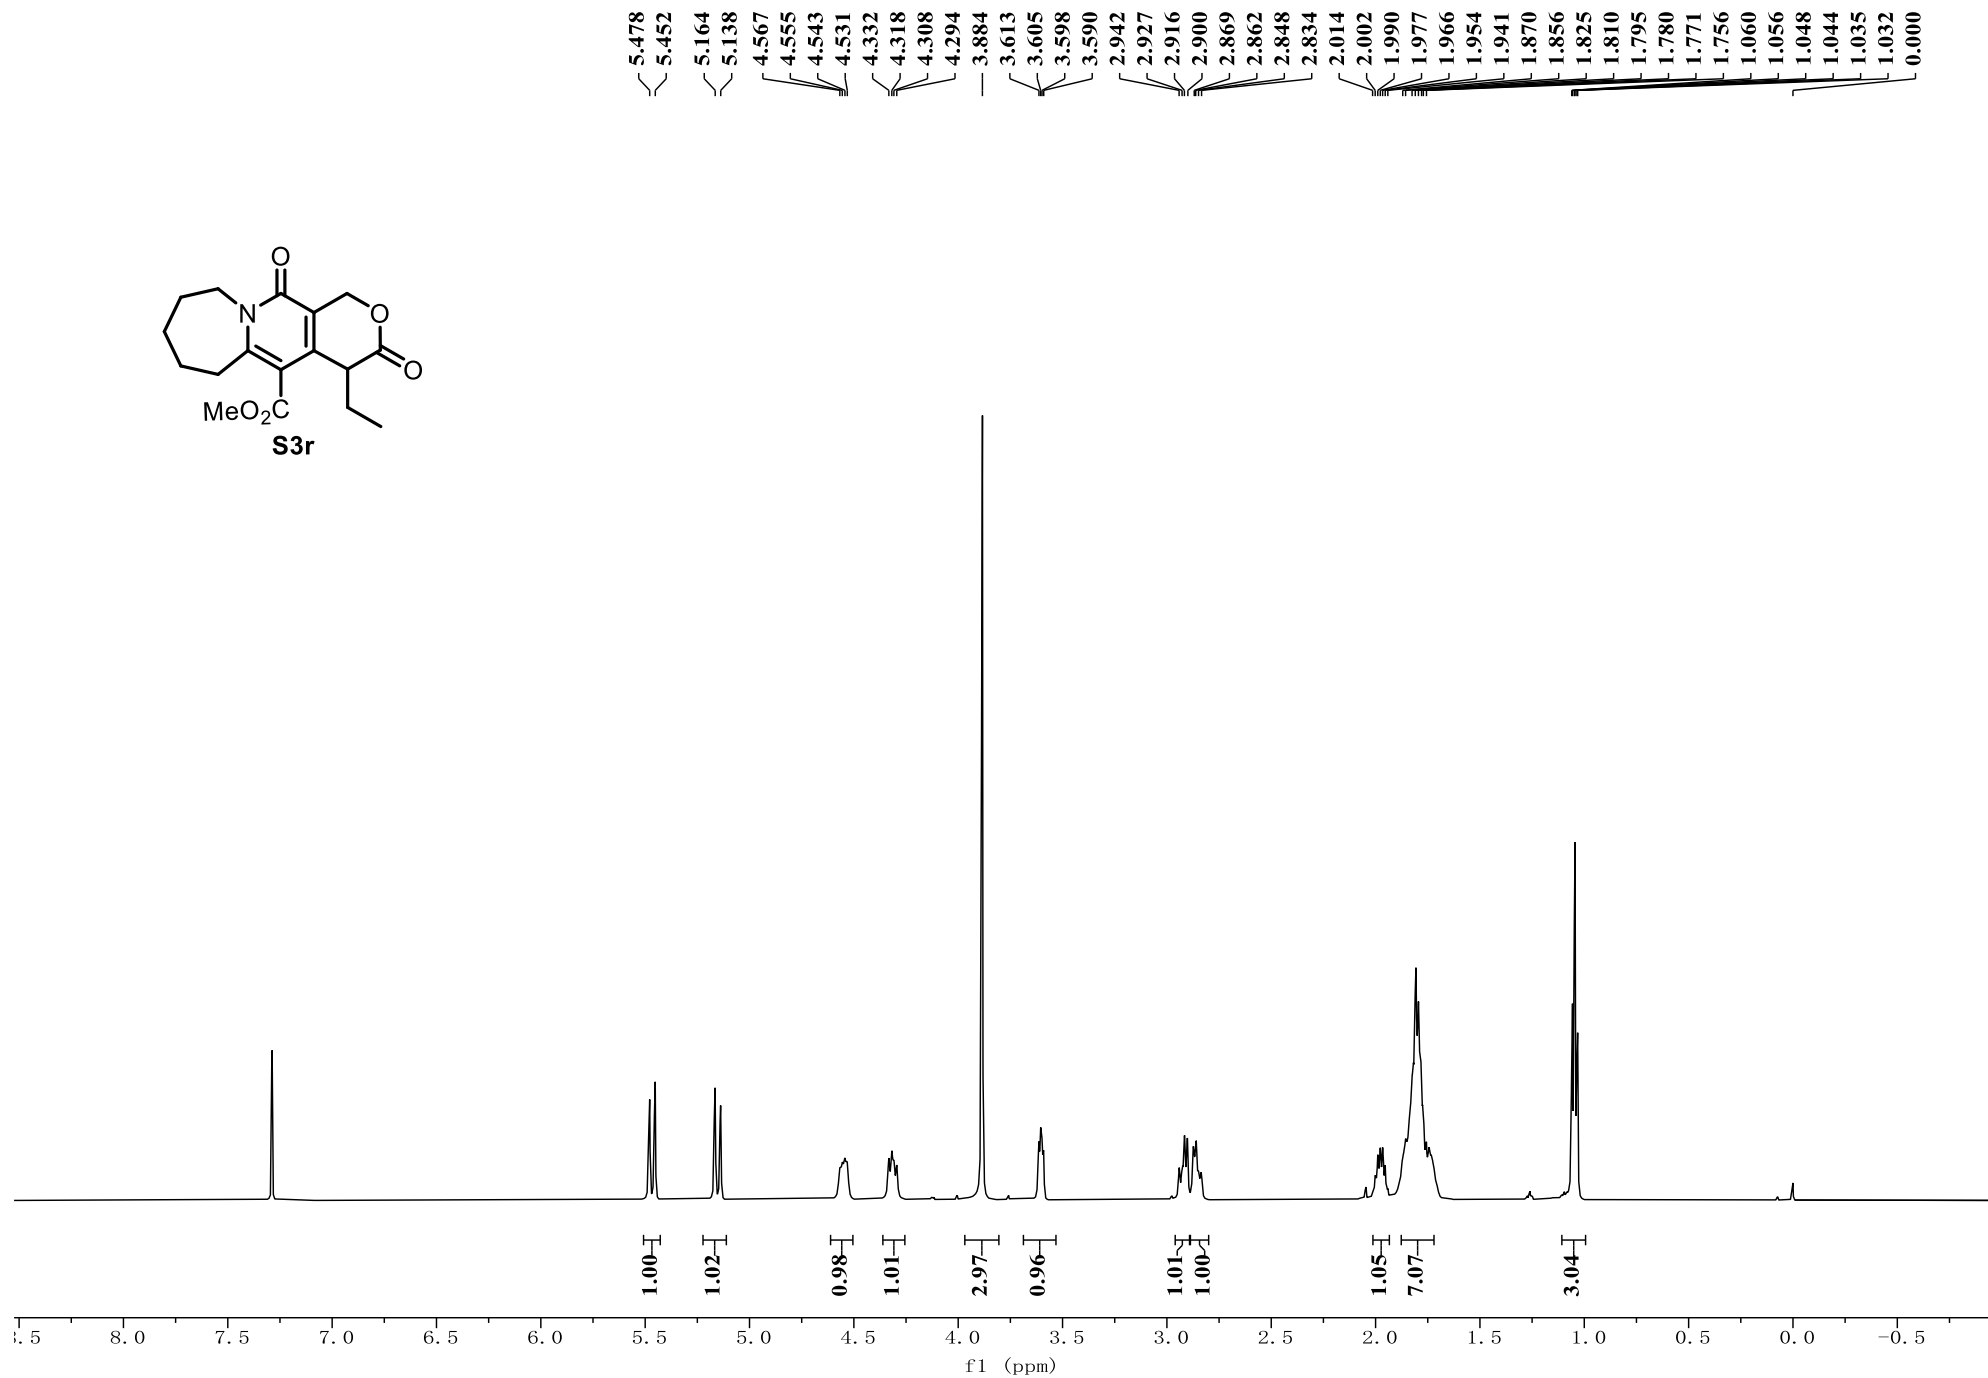

— 170.64  
— 166.89  
— 158.72  
— 152.96  
— 143.27

— 117.70  
— 110.39

77.22  
77.00  
76.79

— 66.05

— 52.57

43.99  
43.59

31.63  
28.86  
27.06  
25.89  
25.51

— 11.59

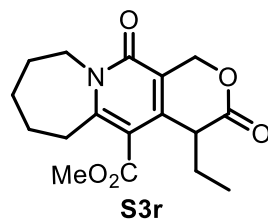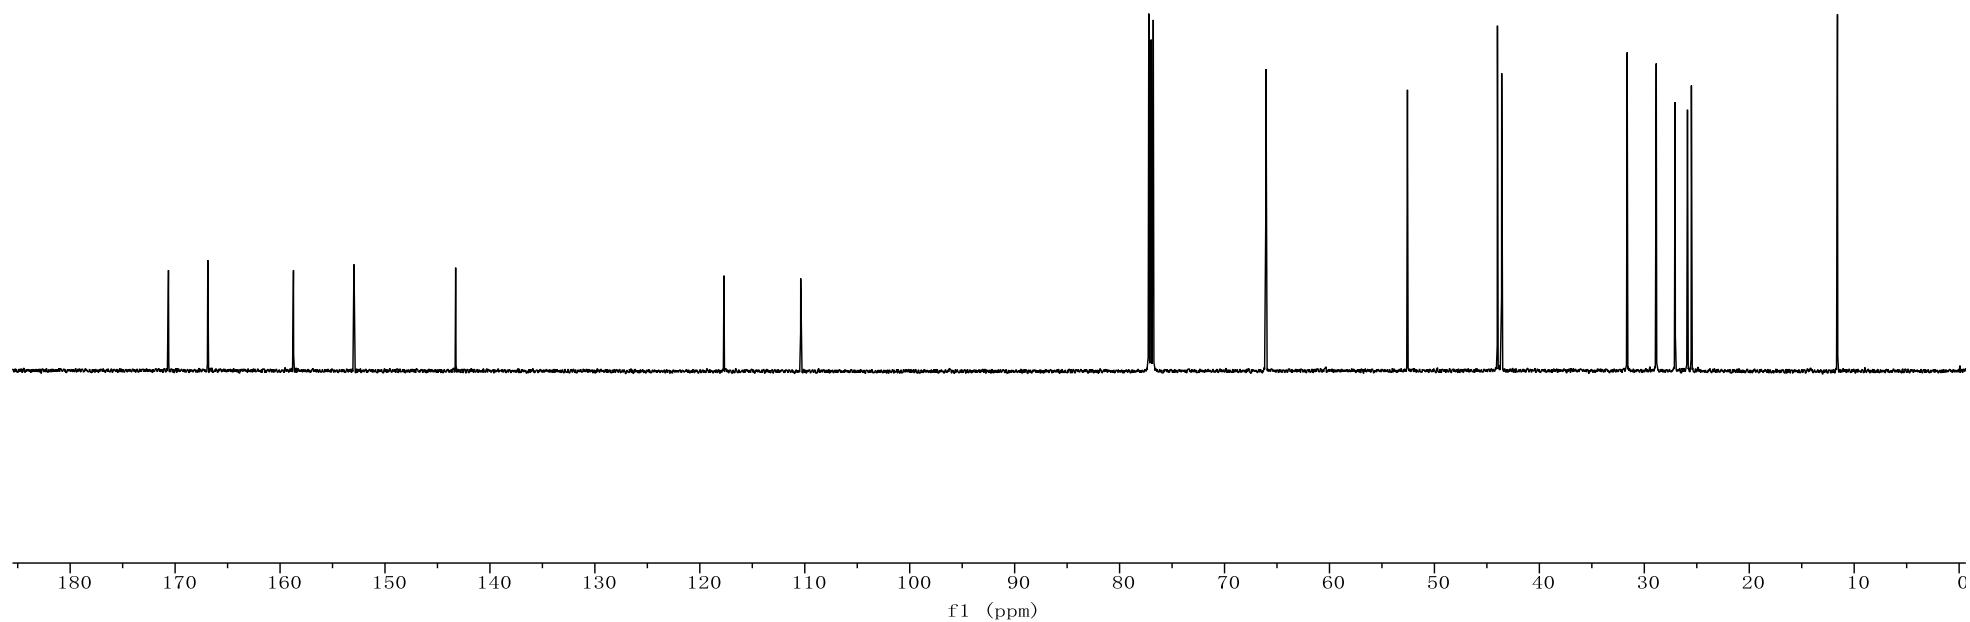

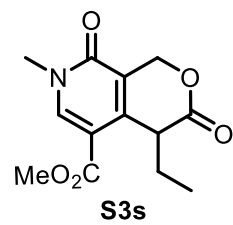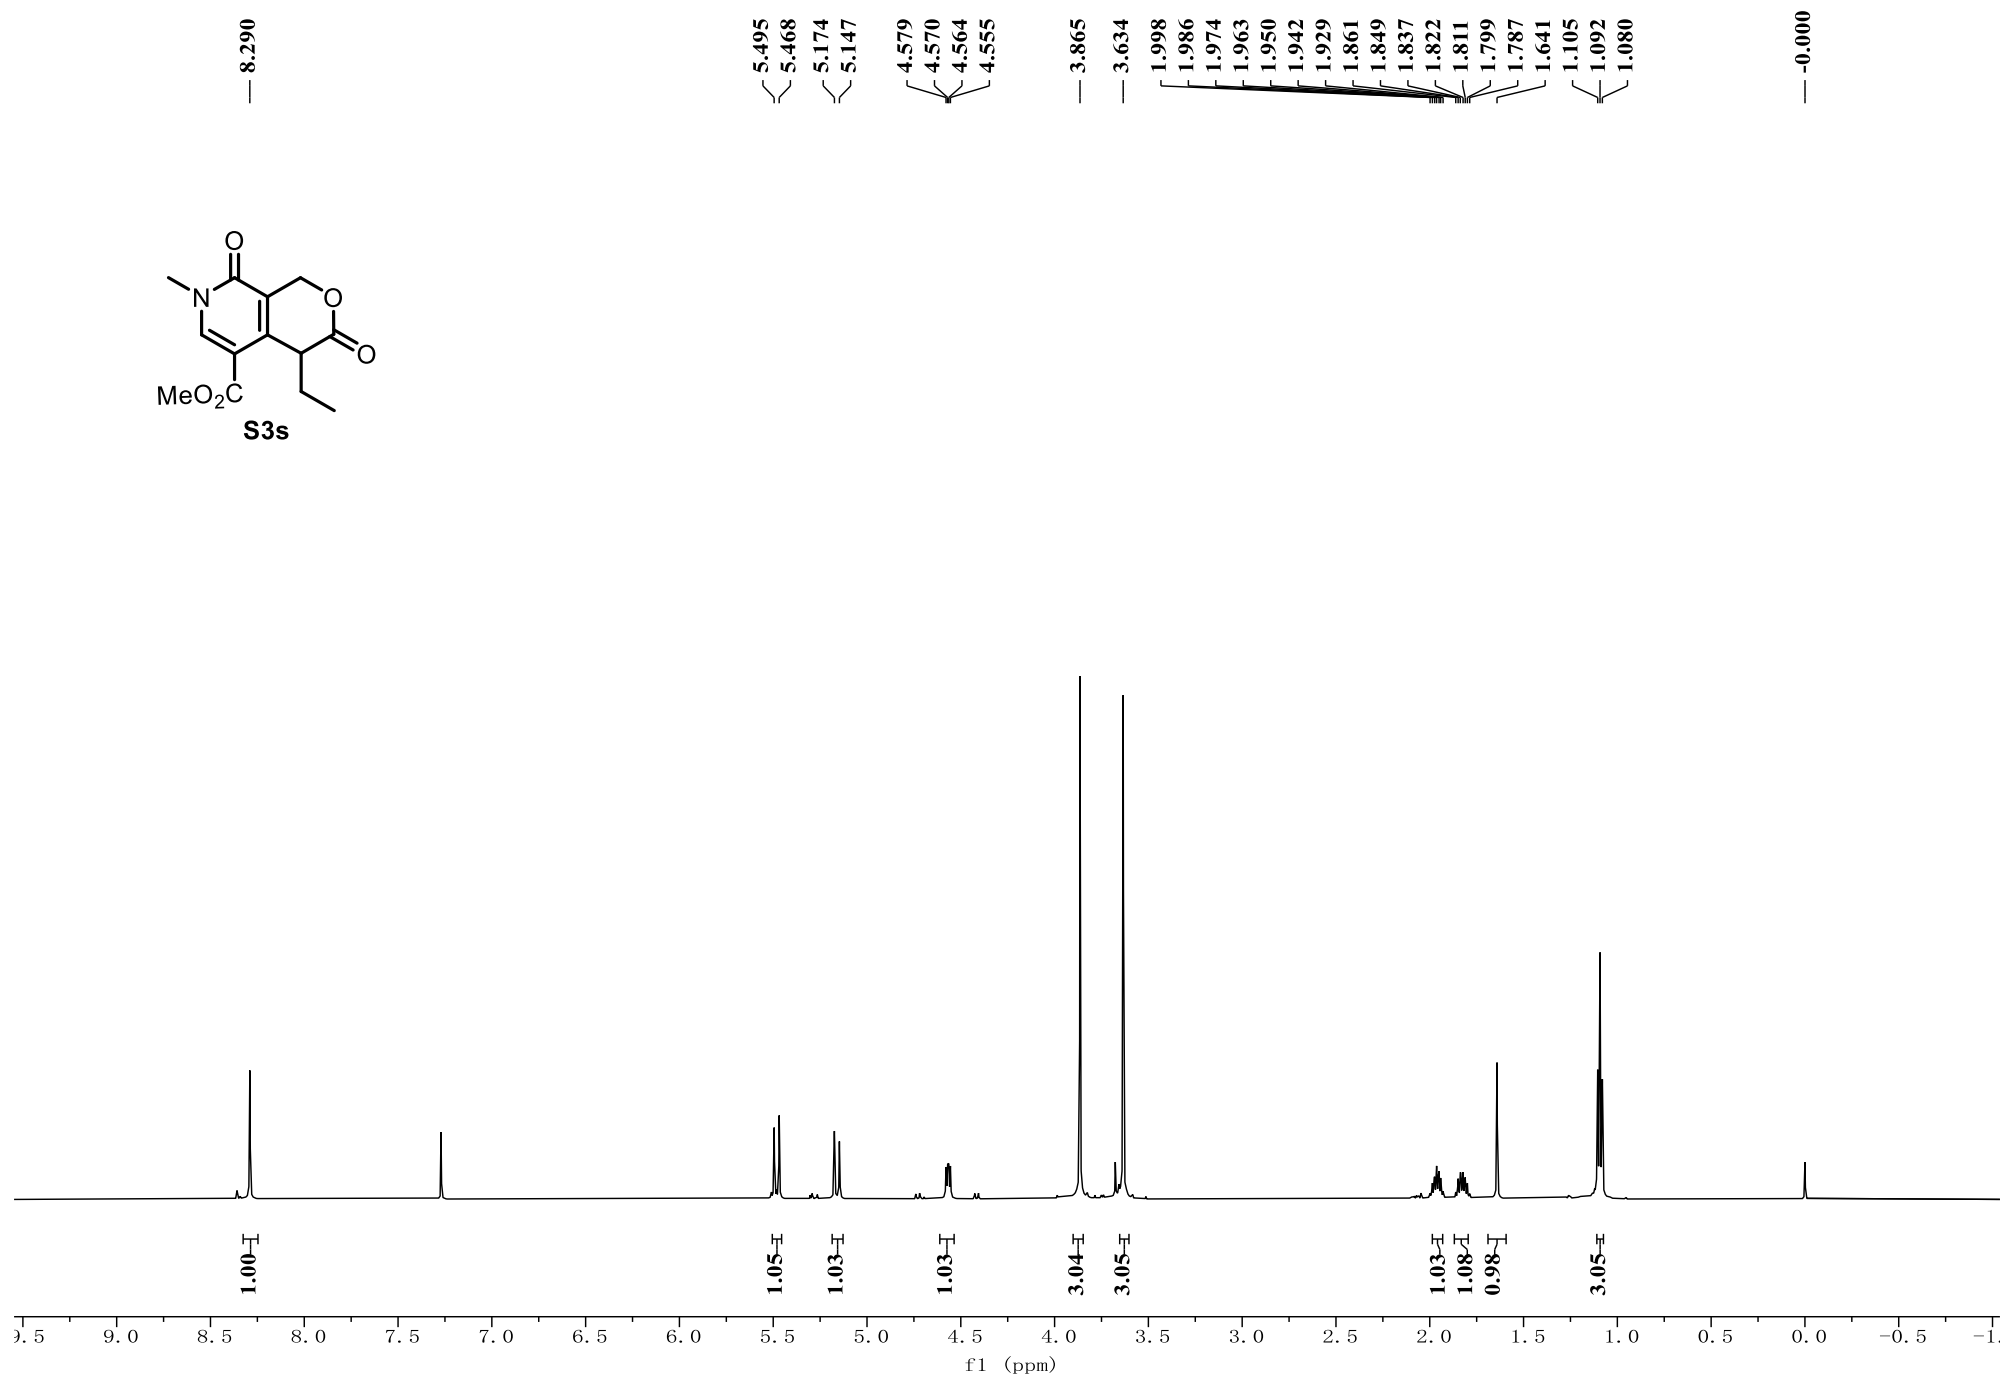

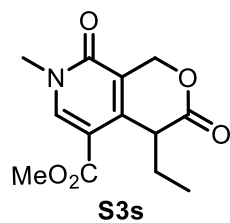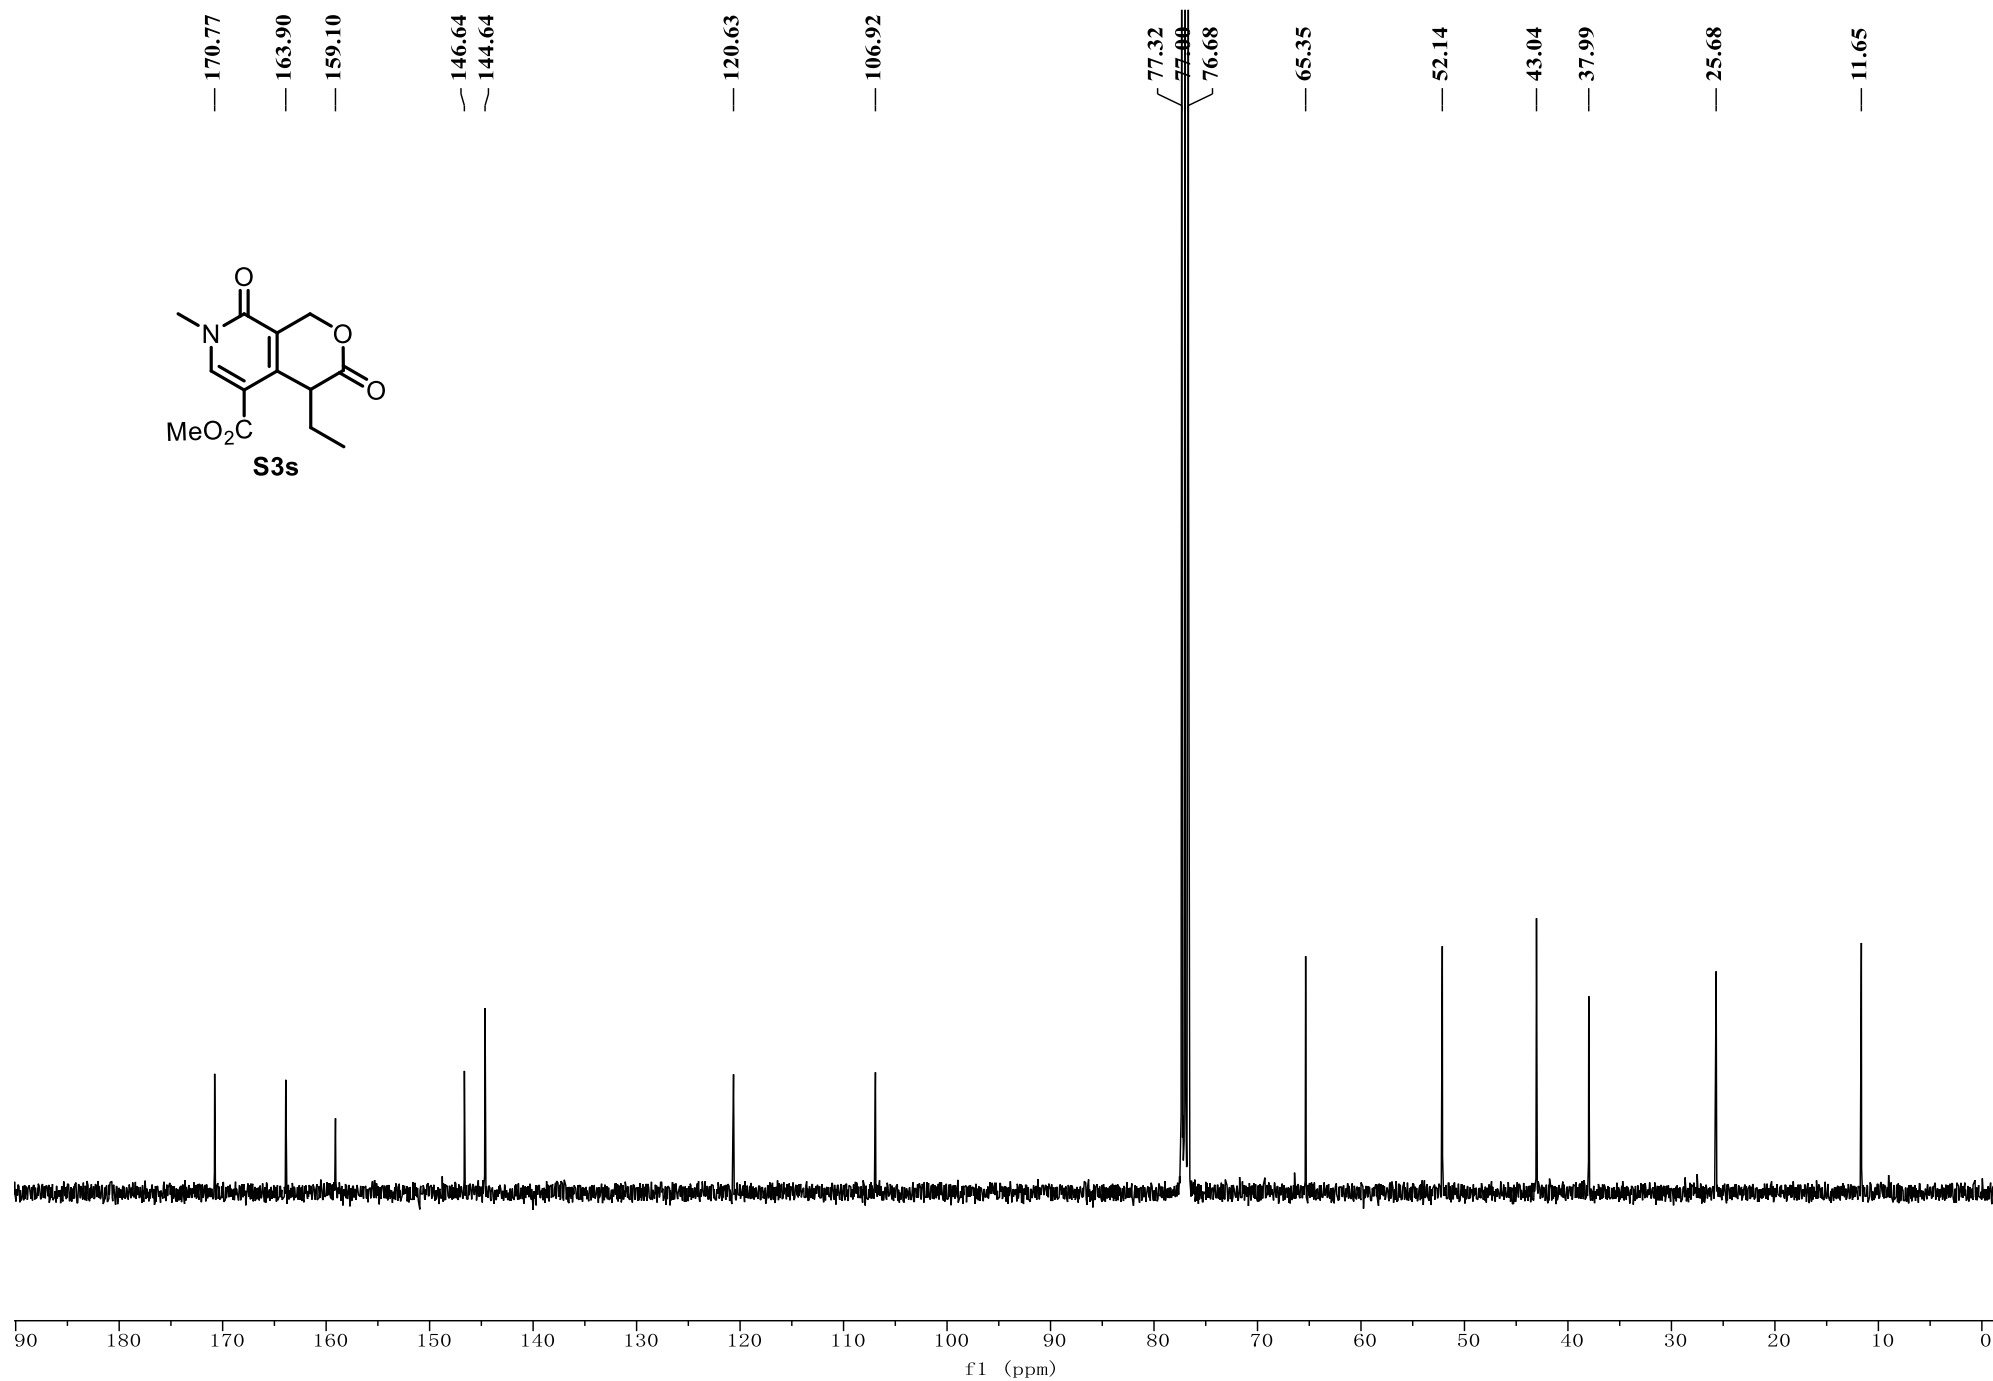

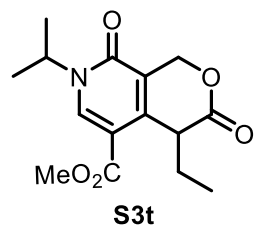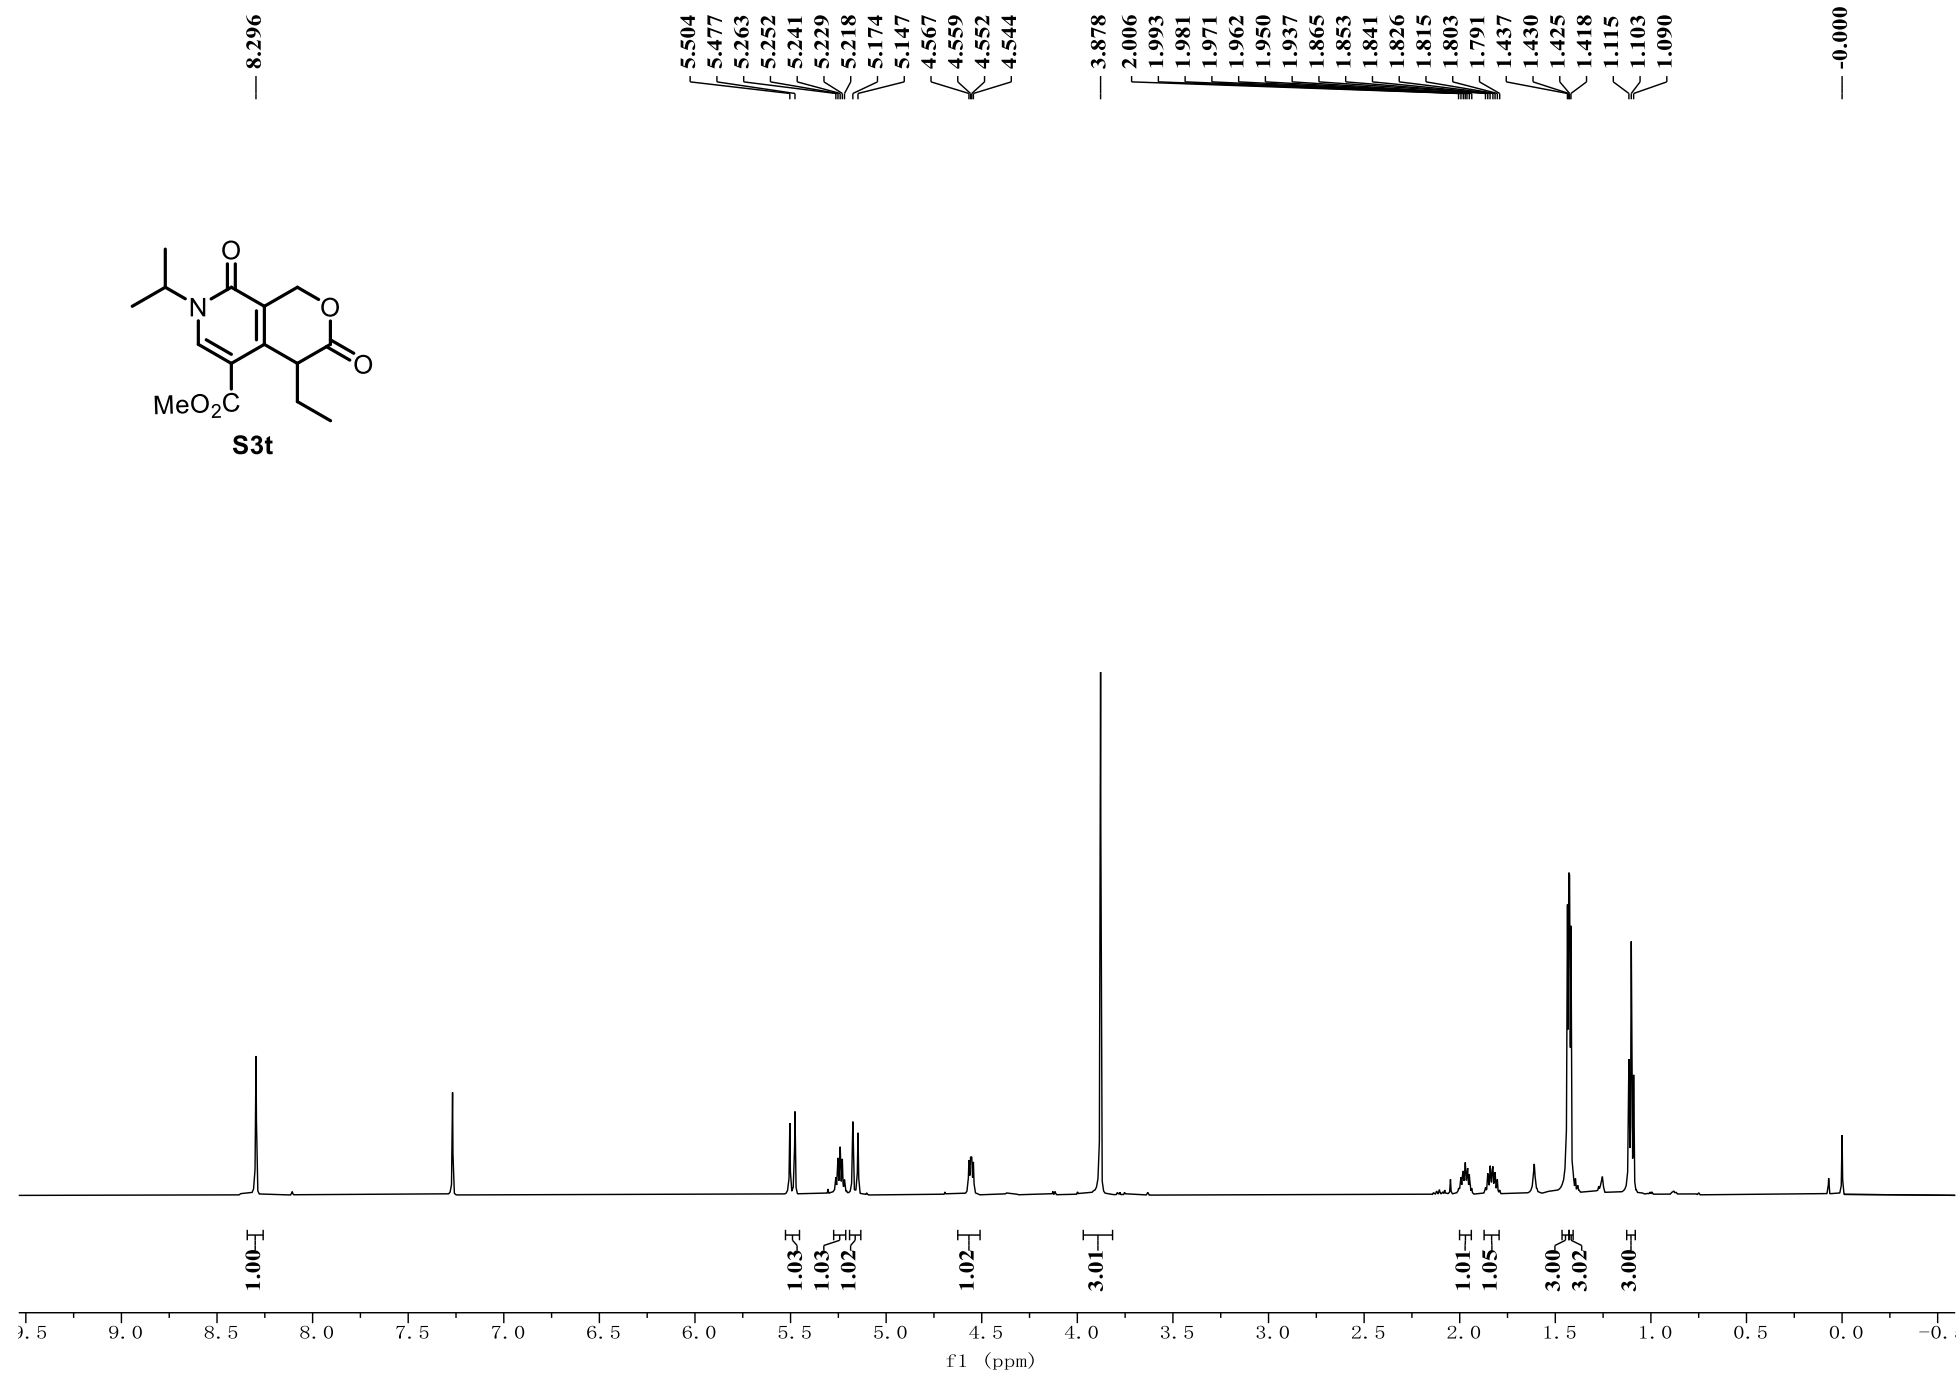

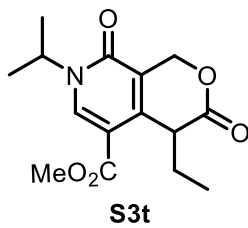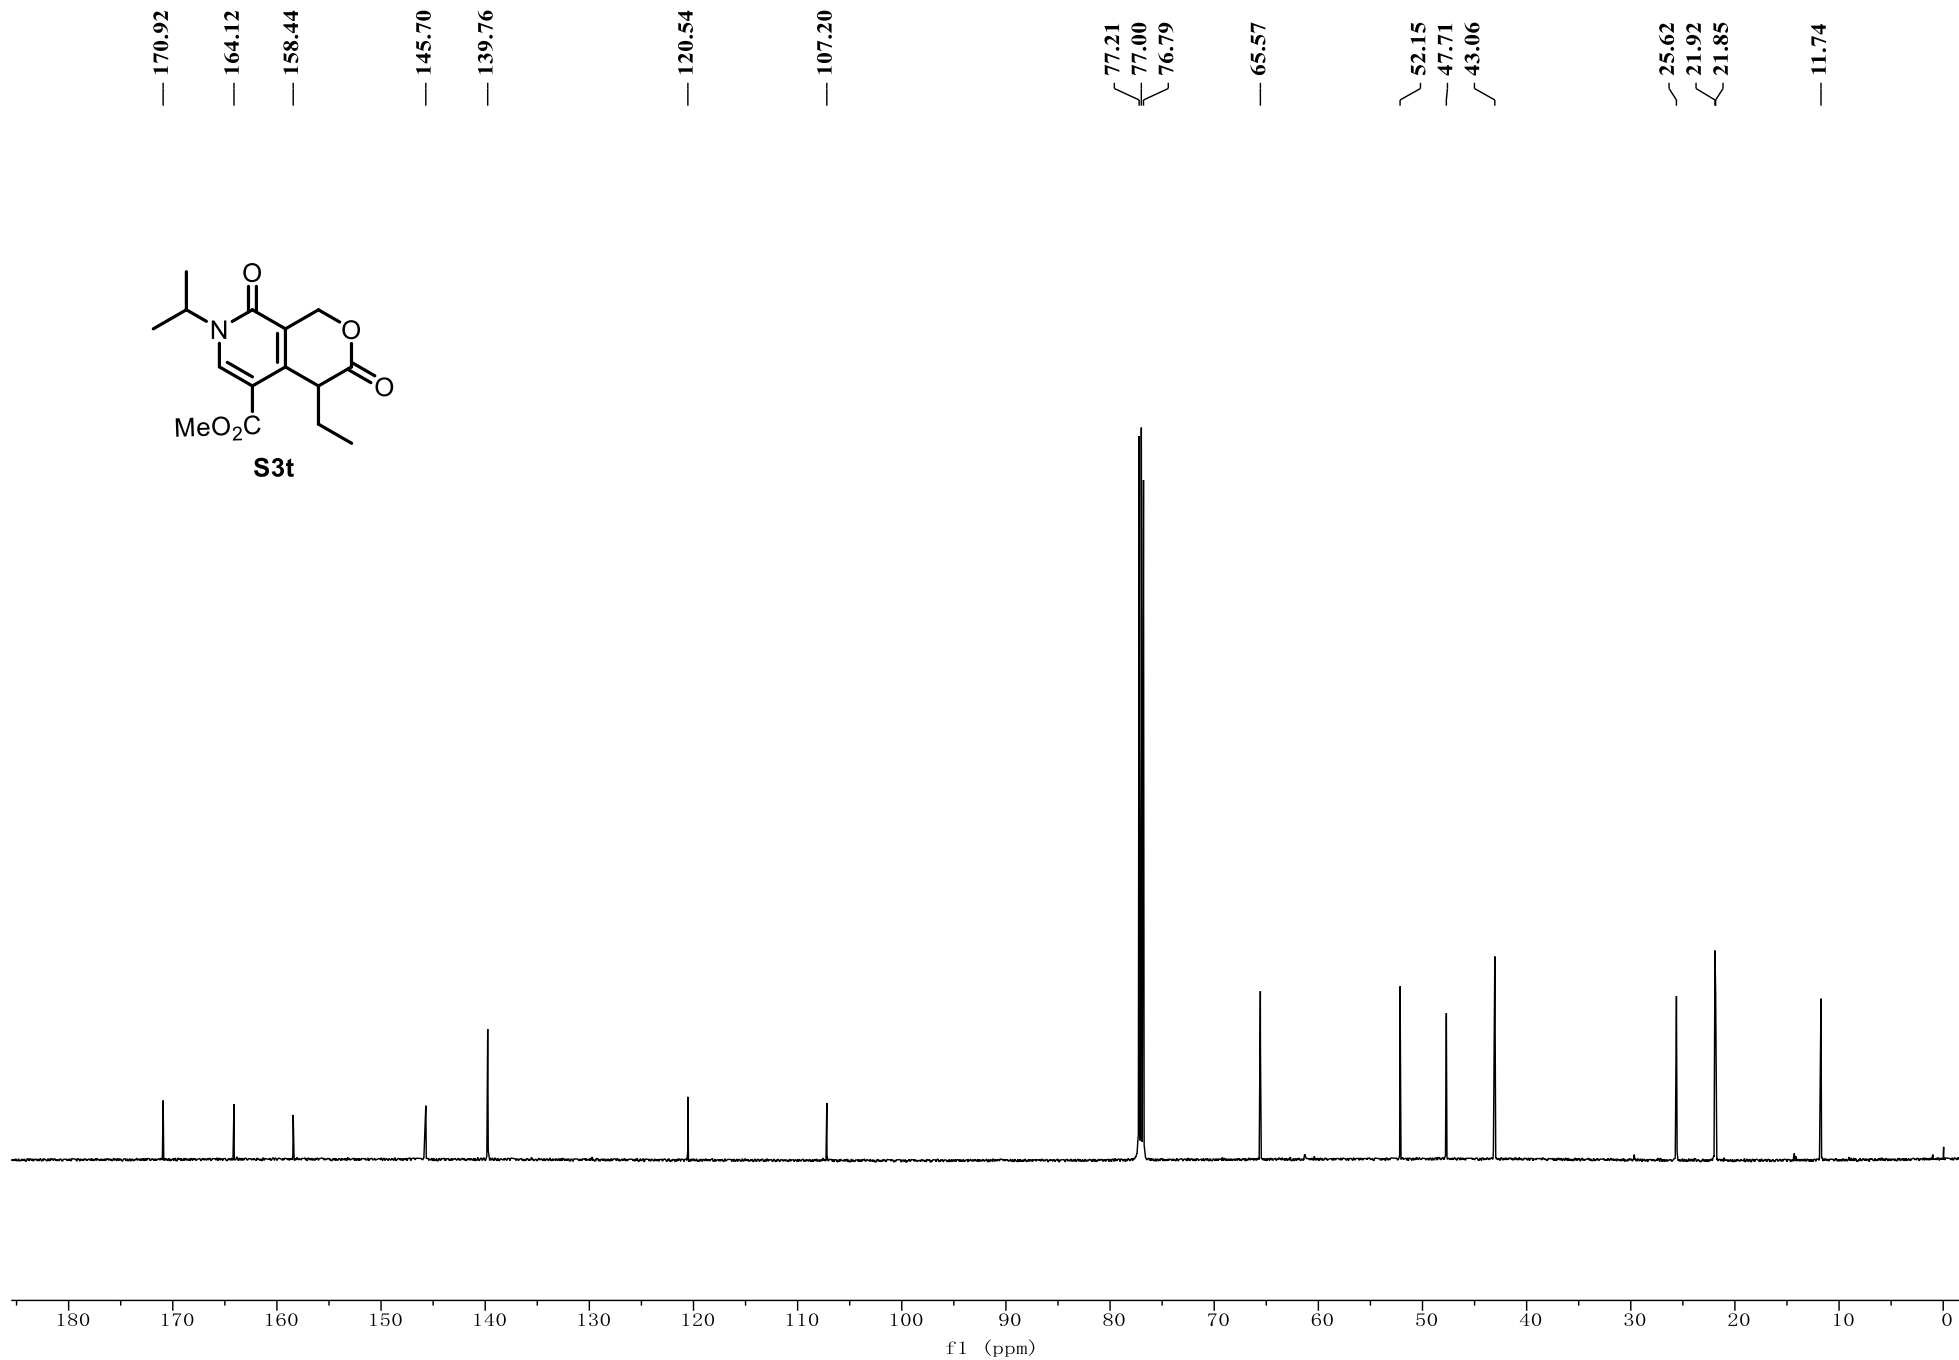

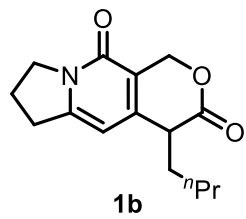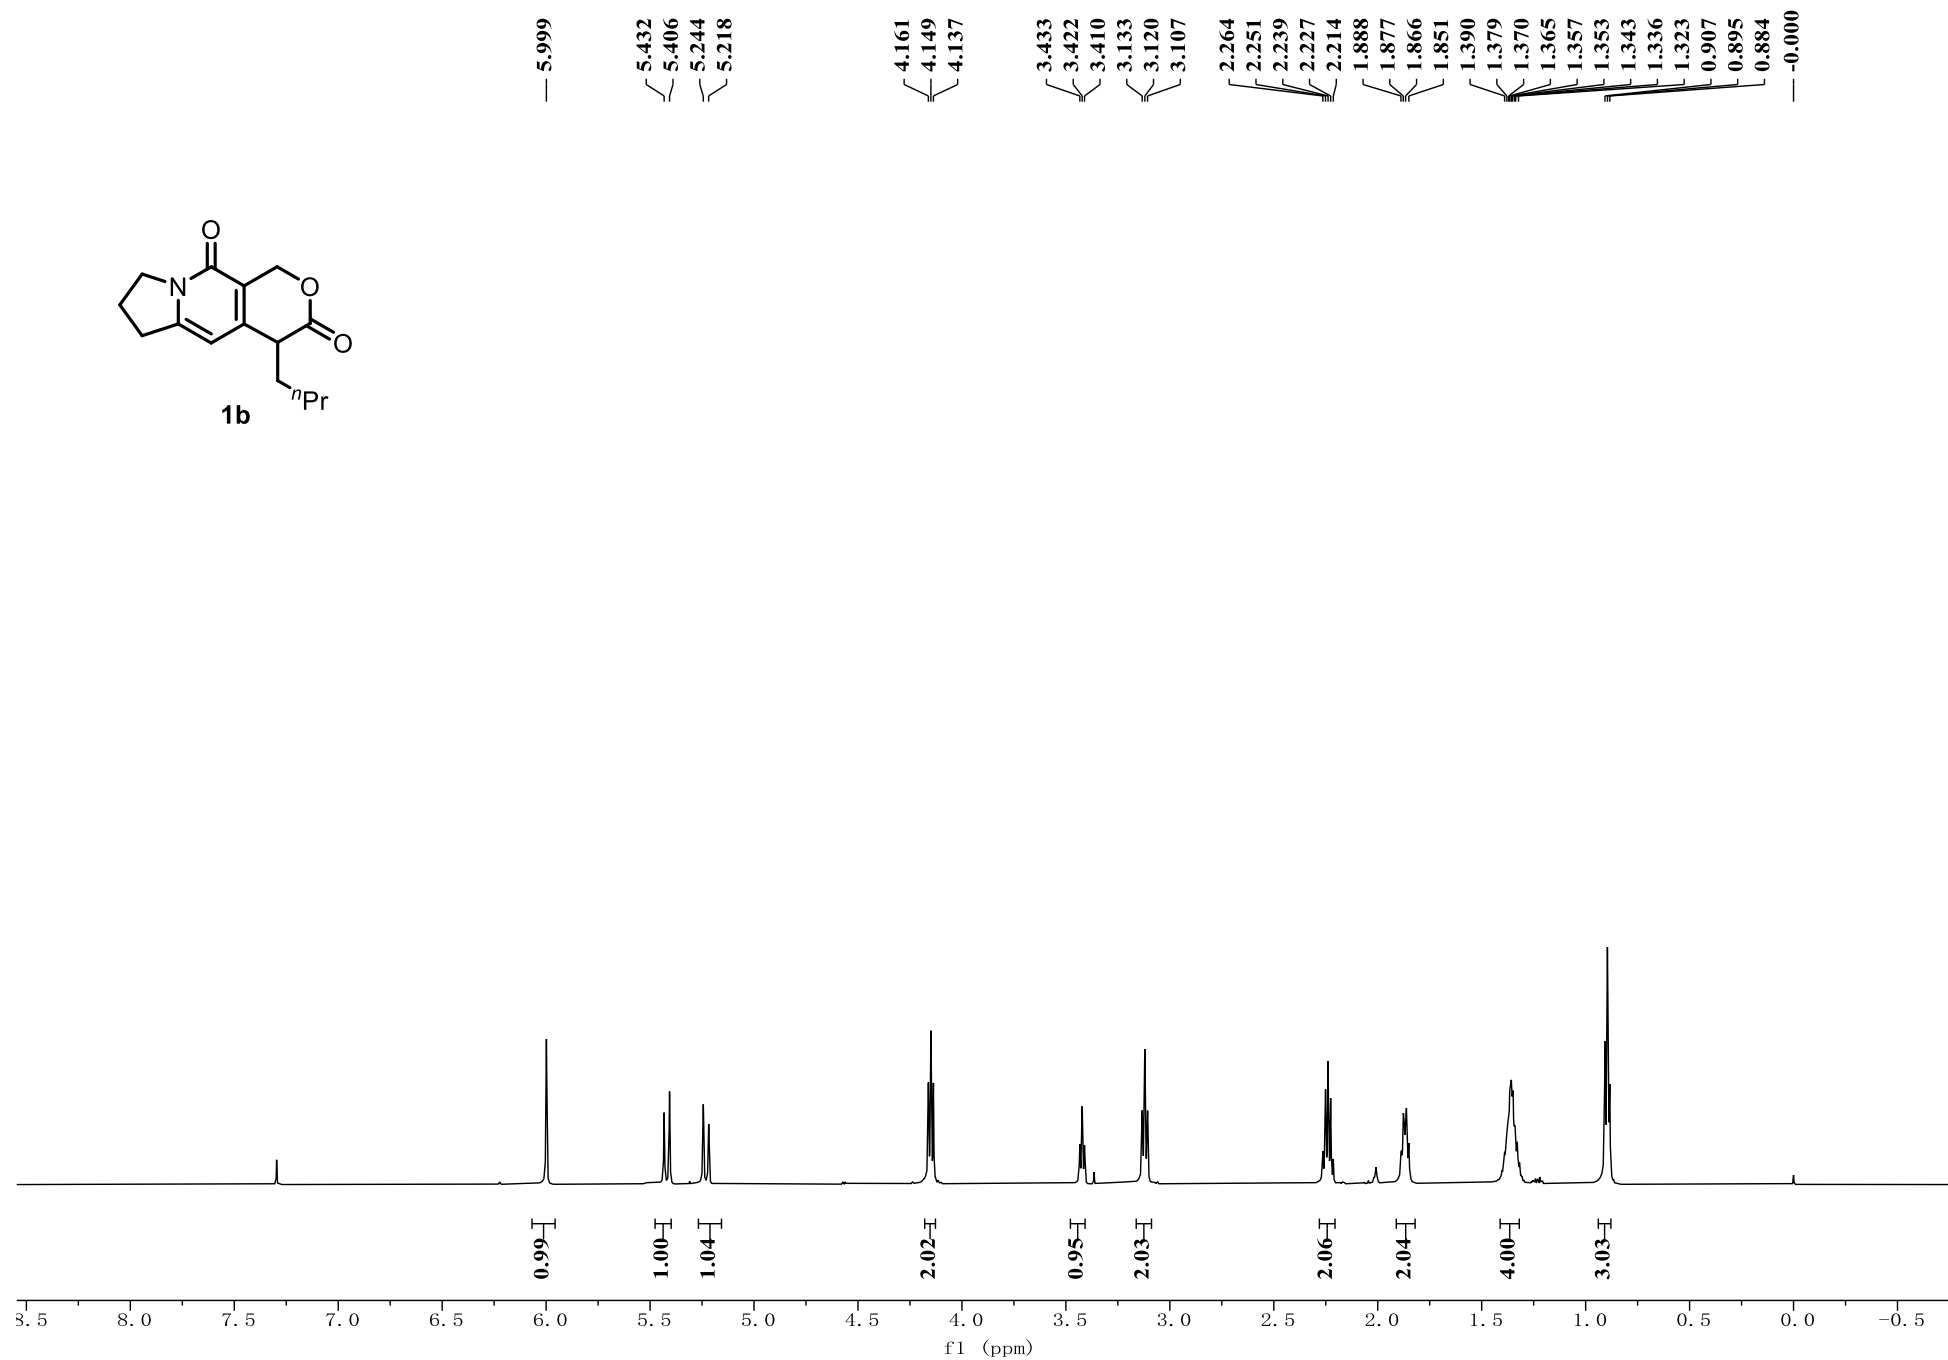

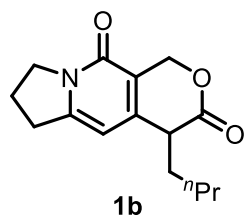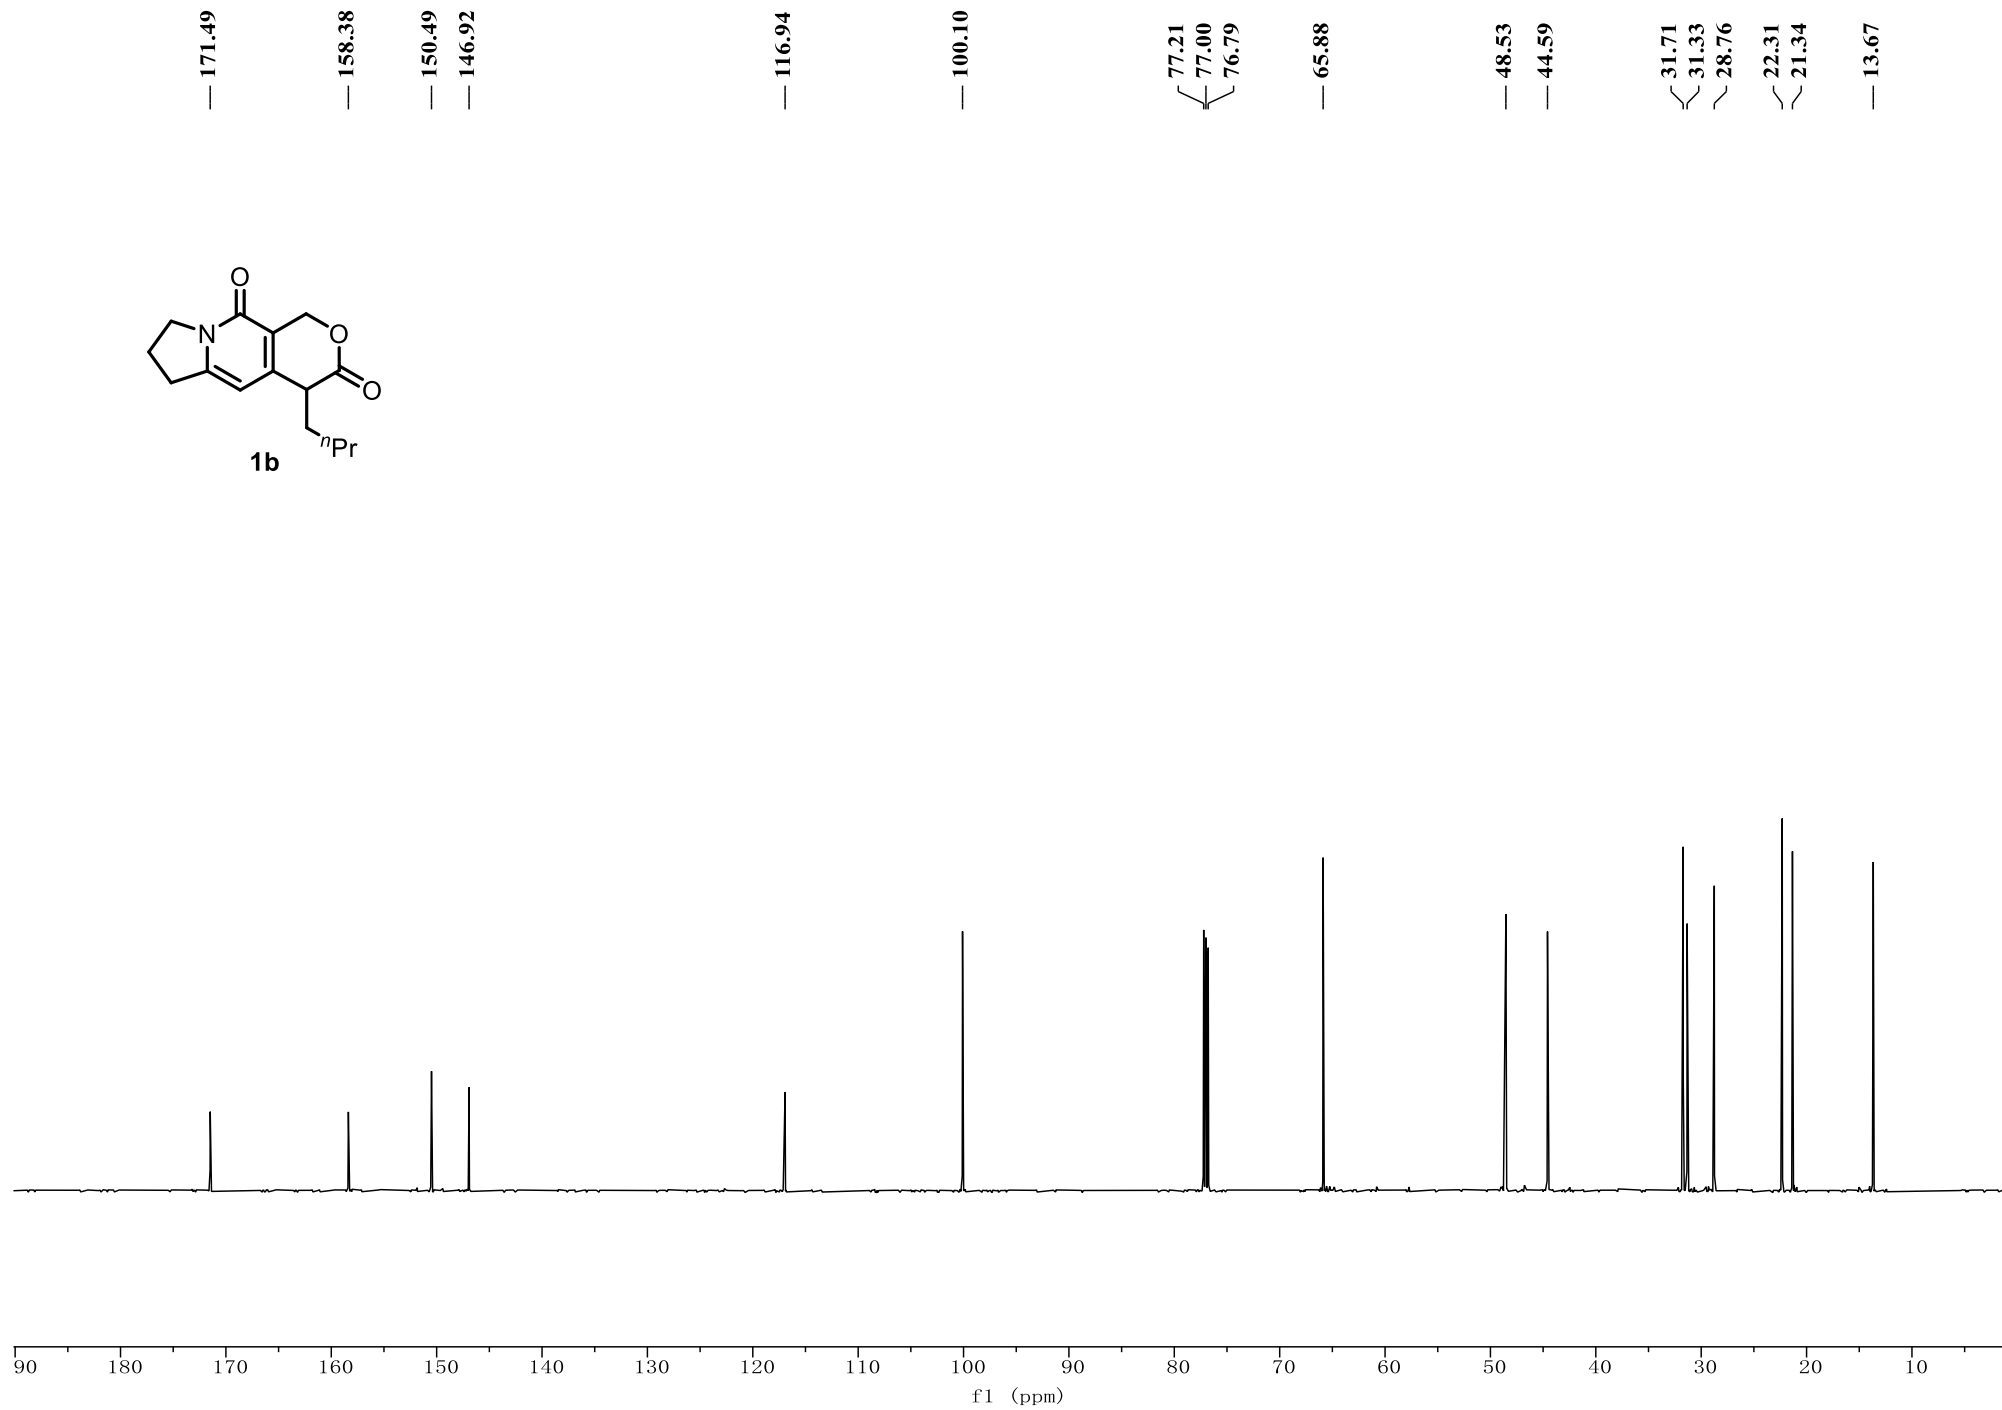

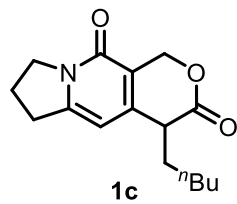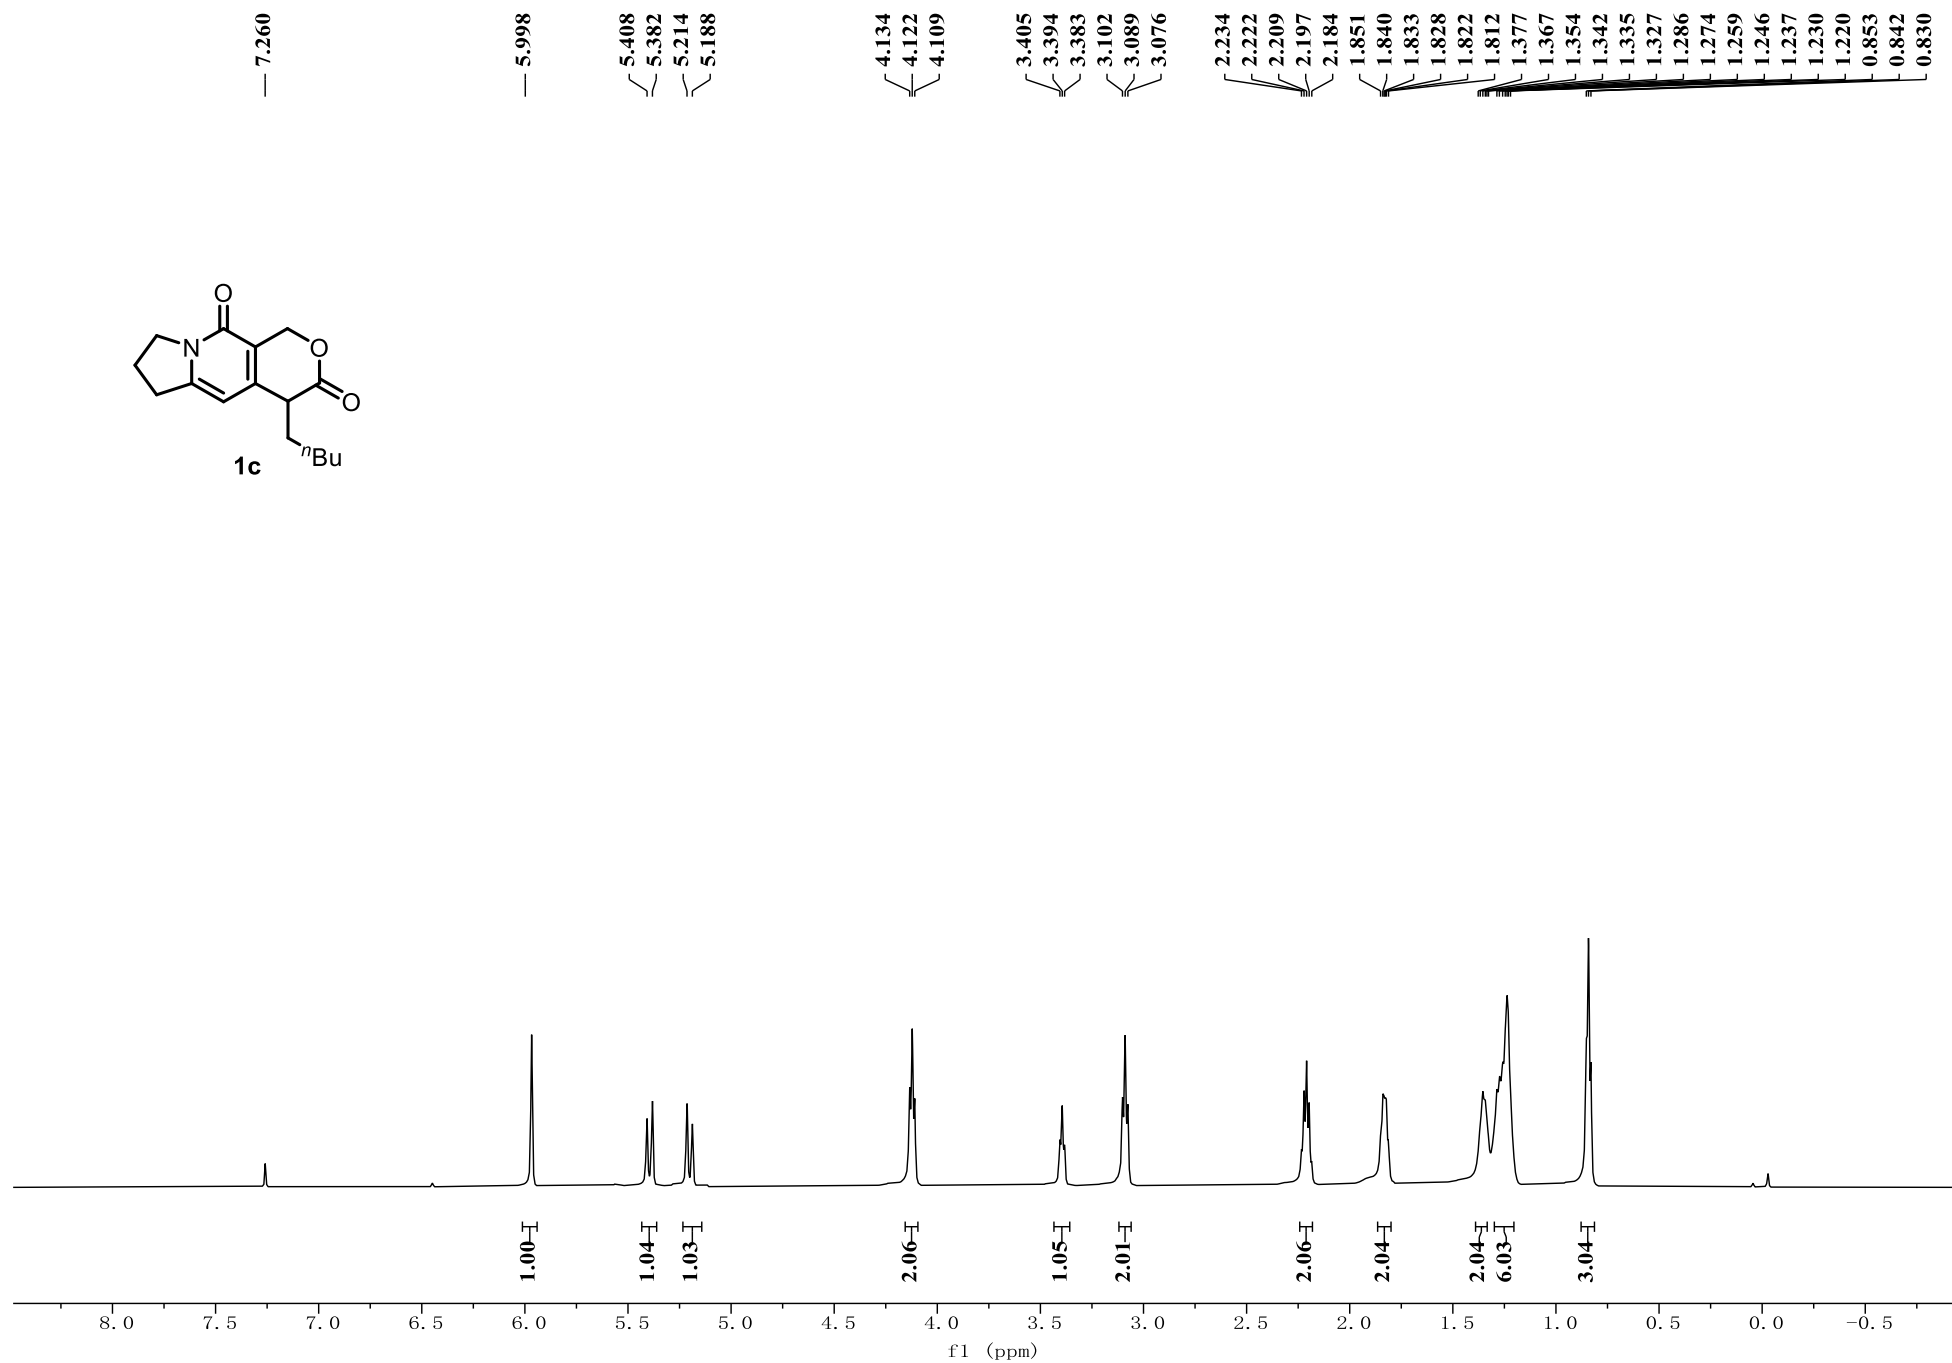

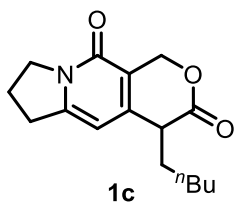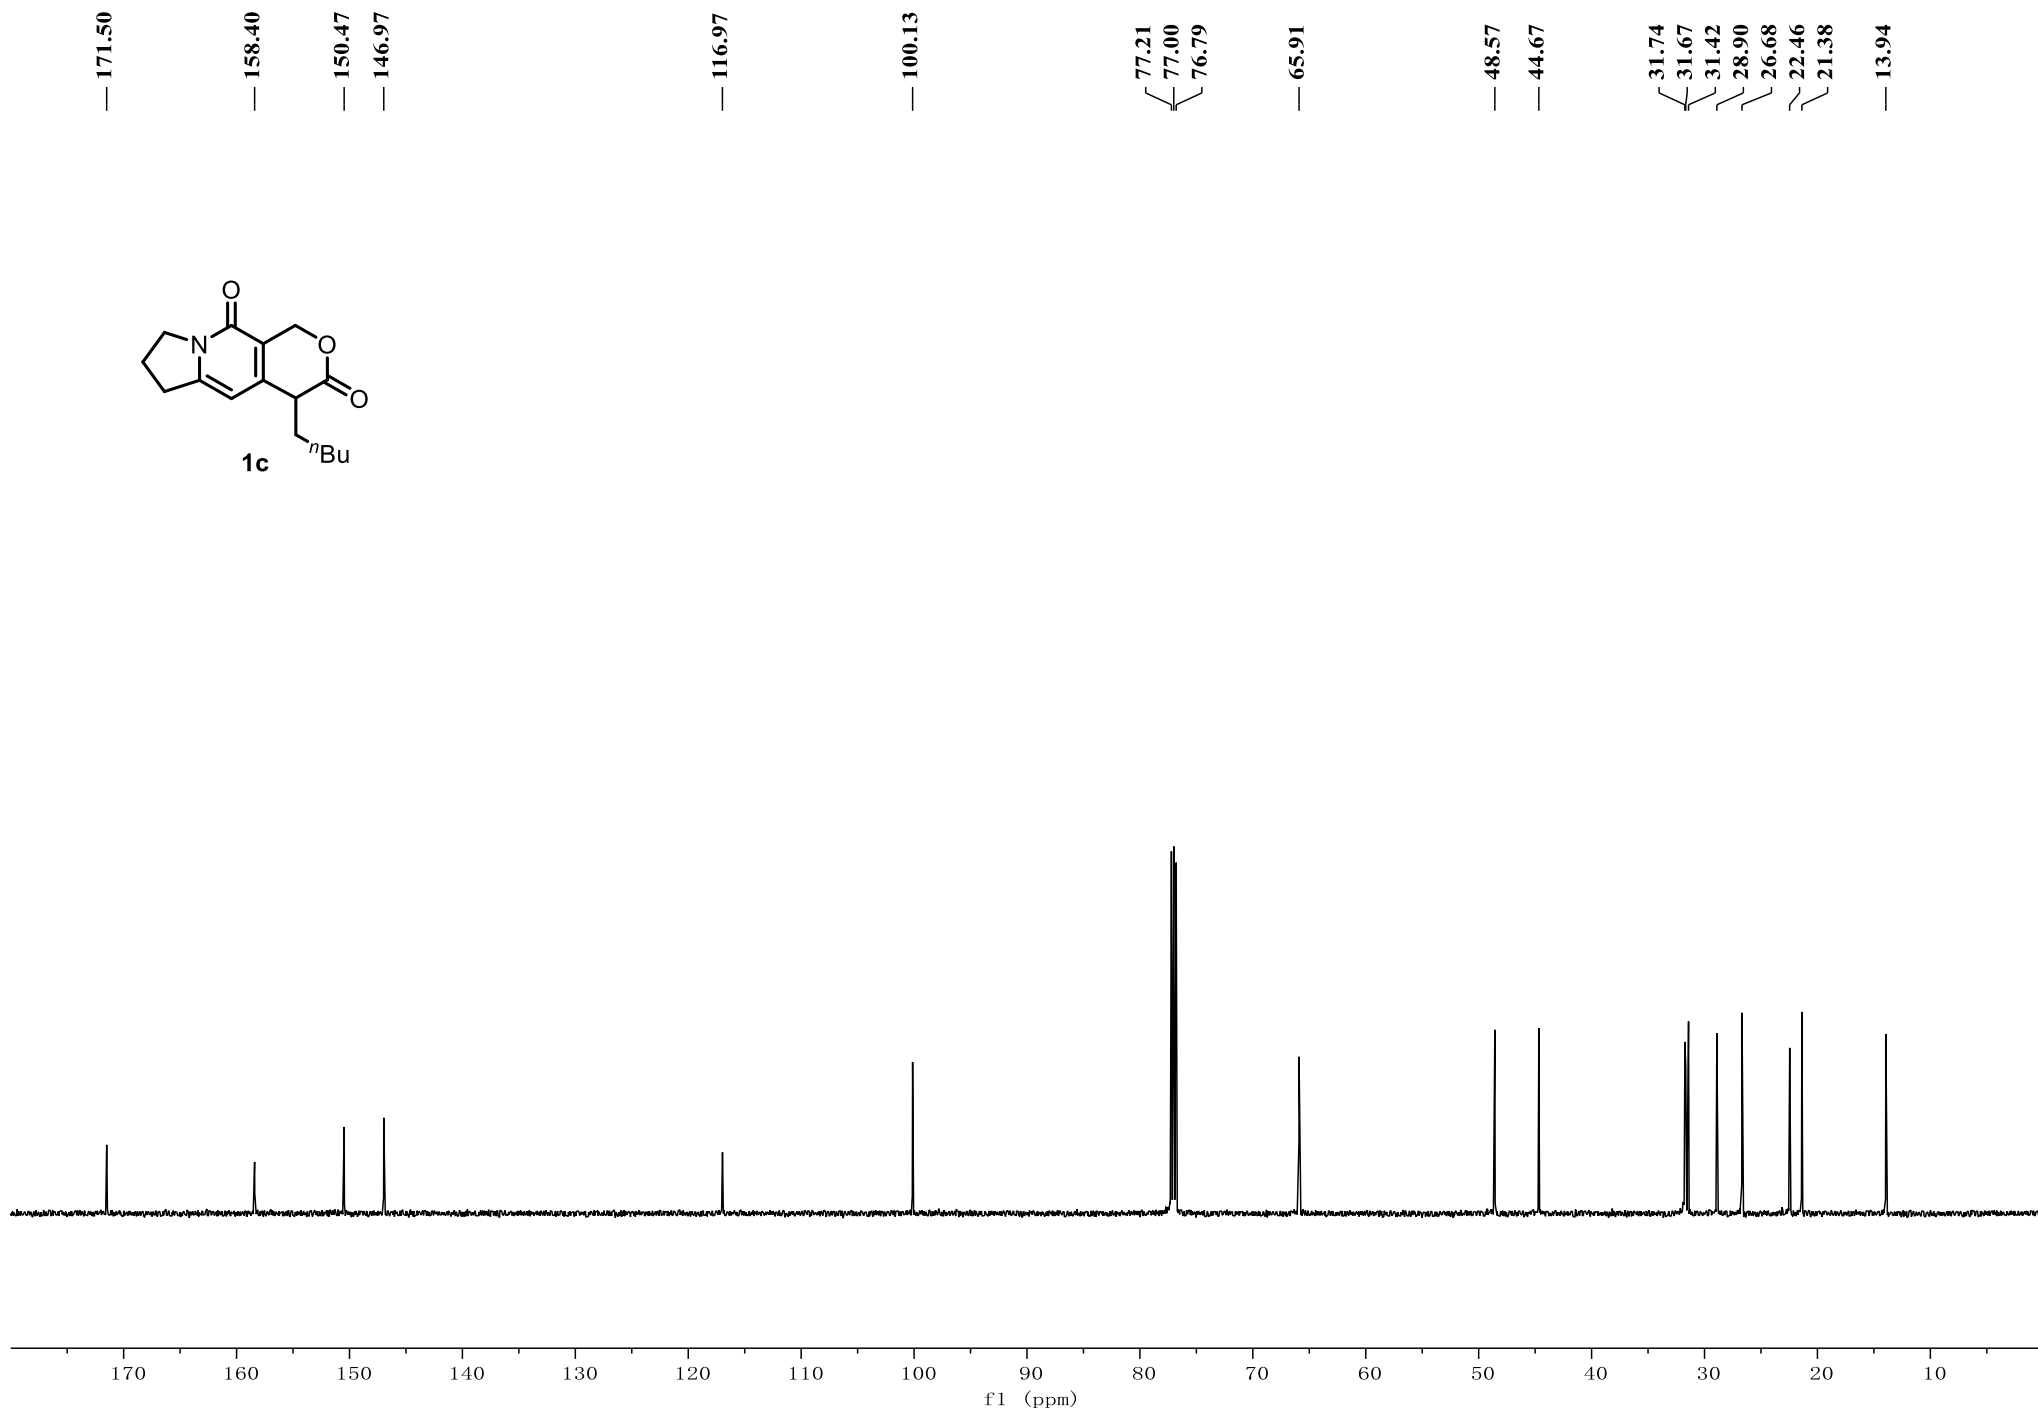

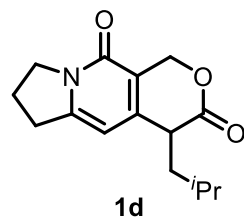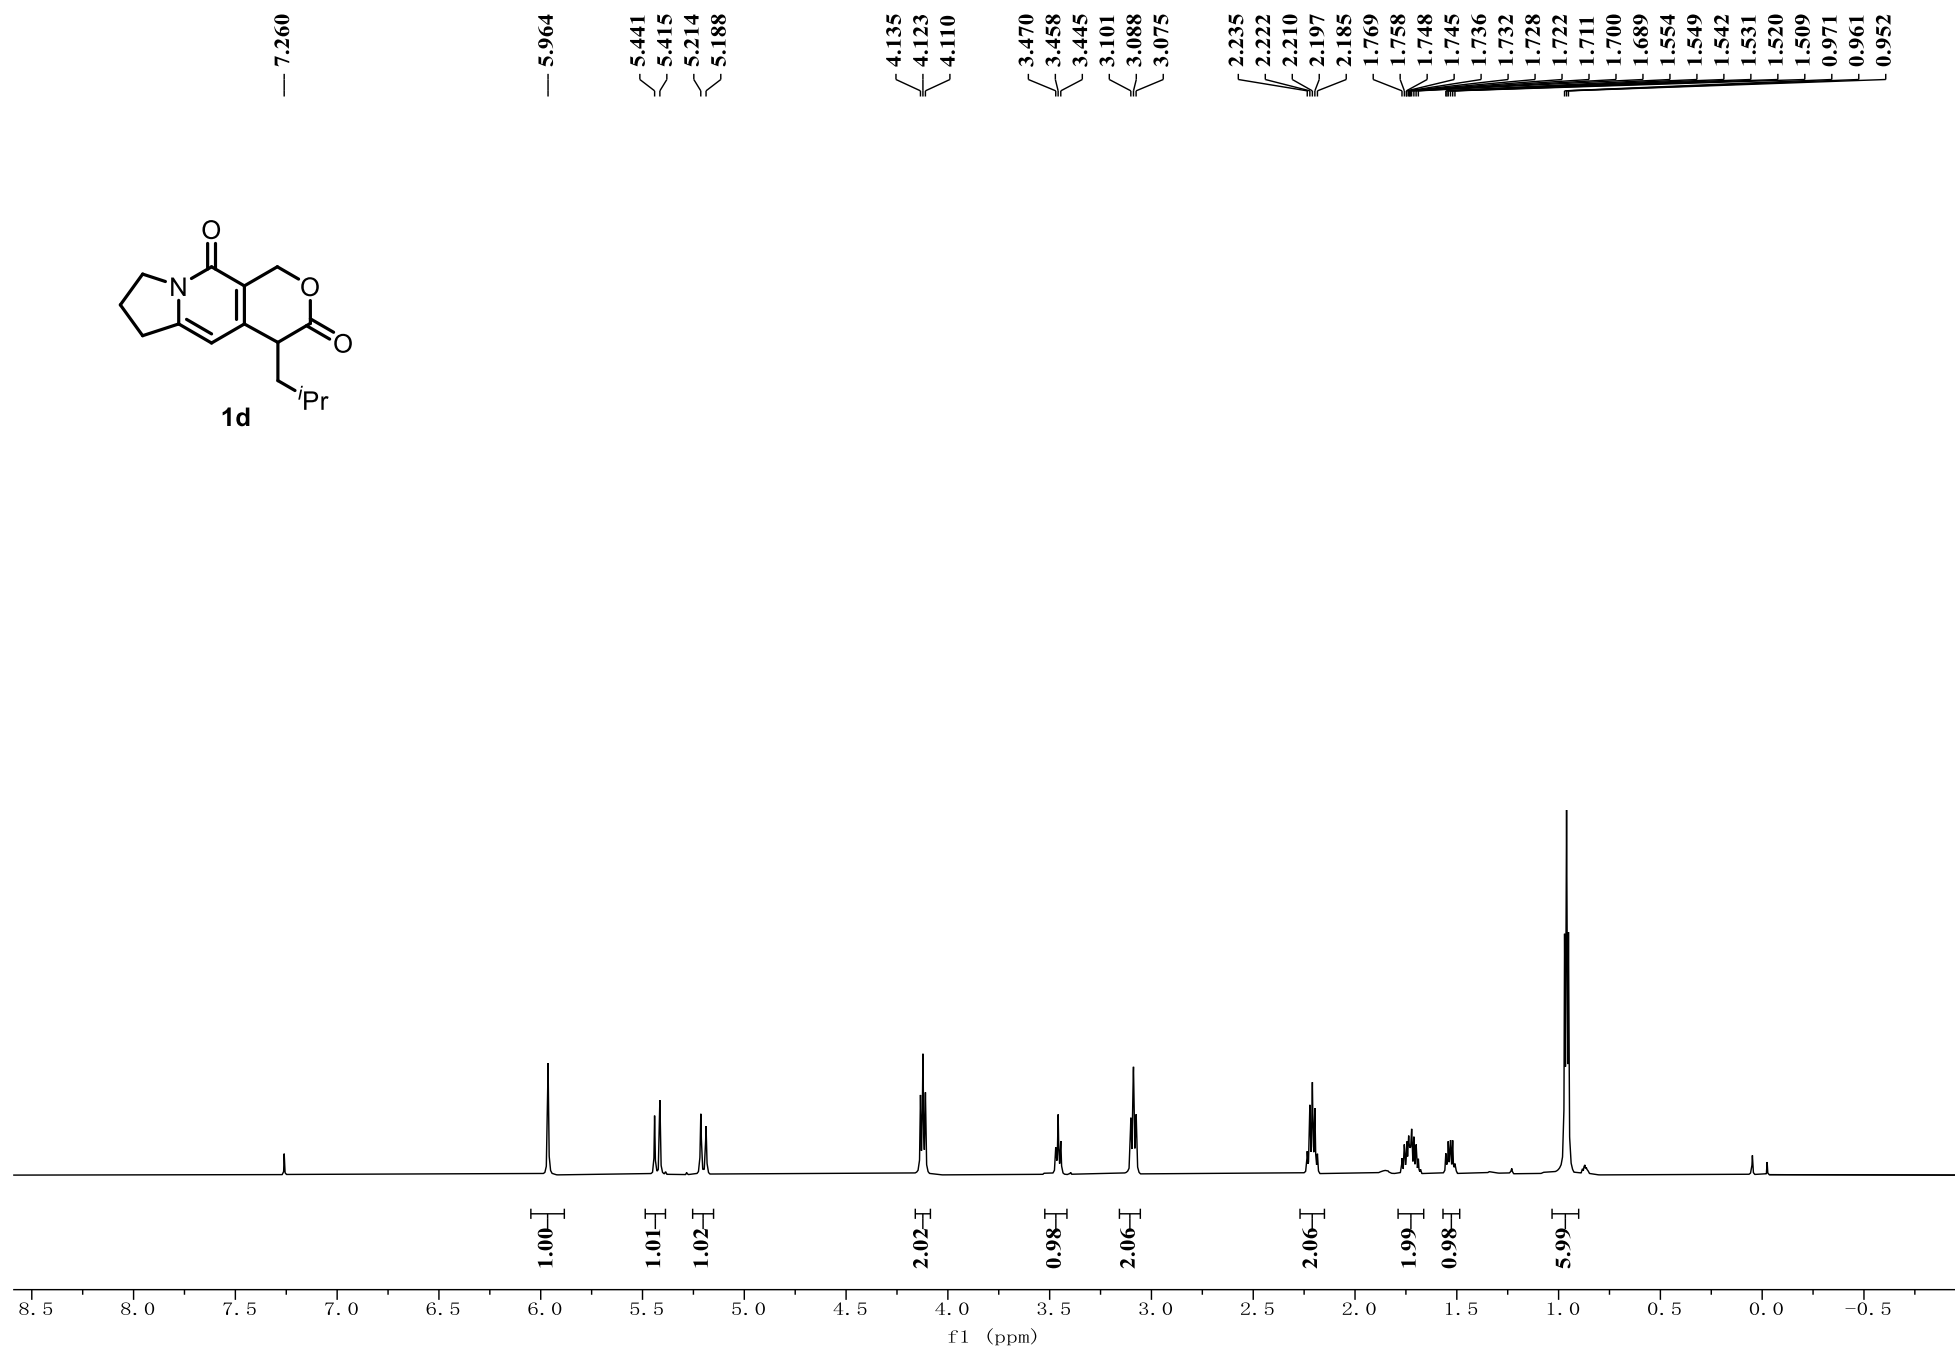

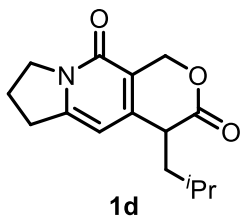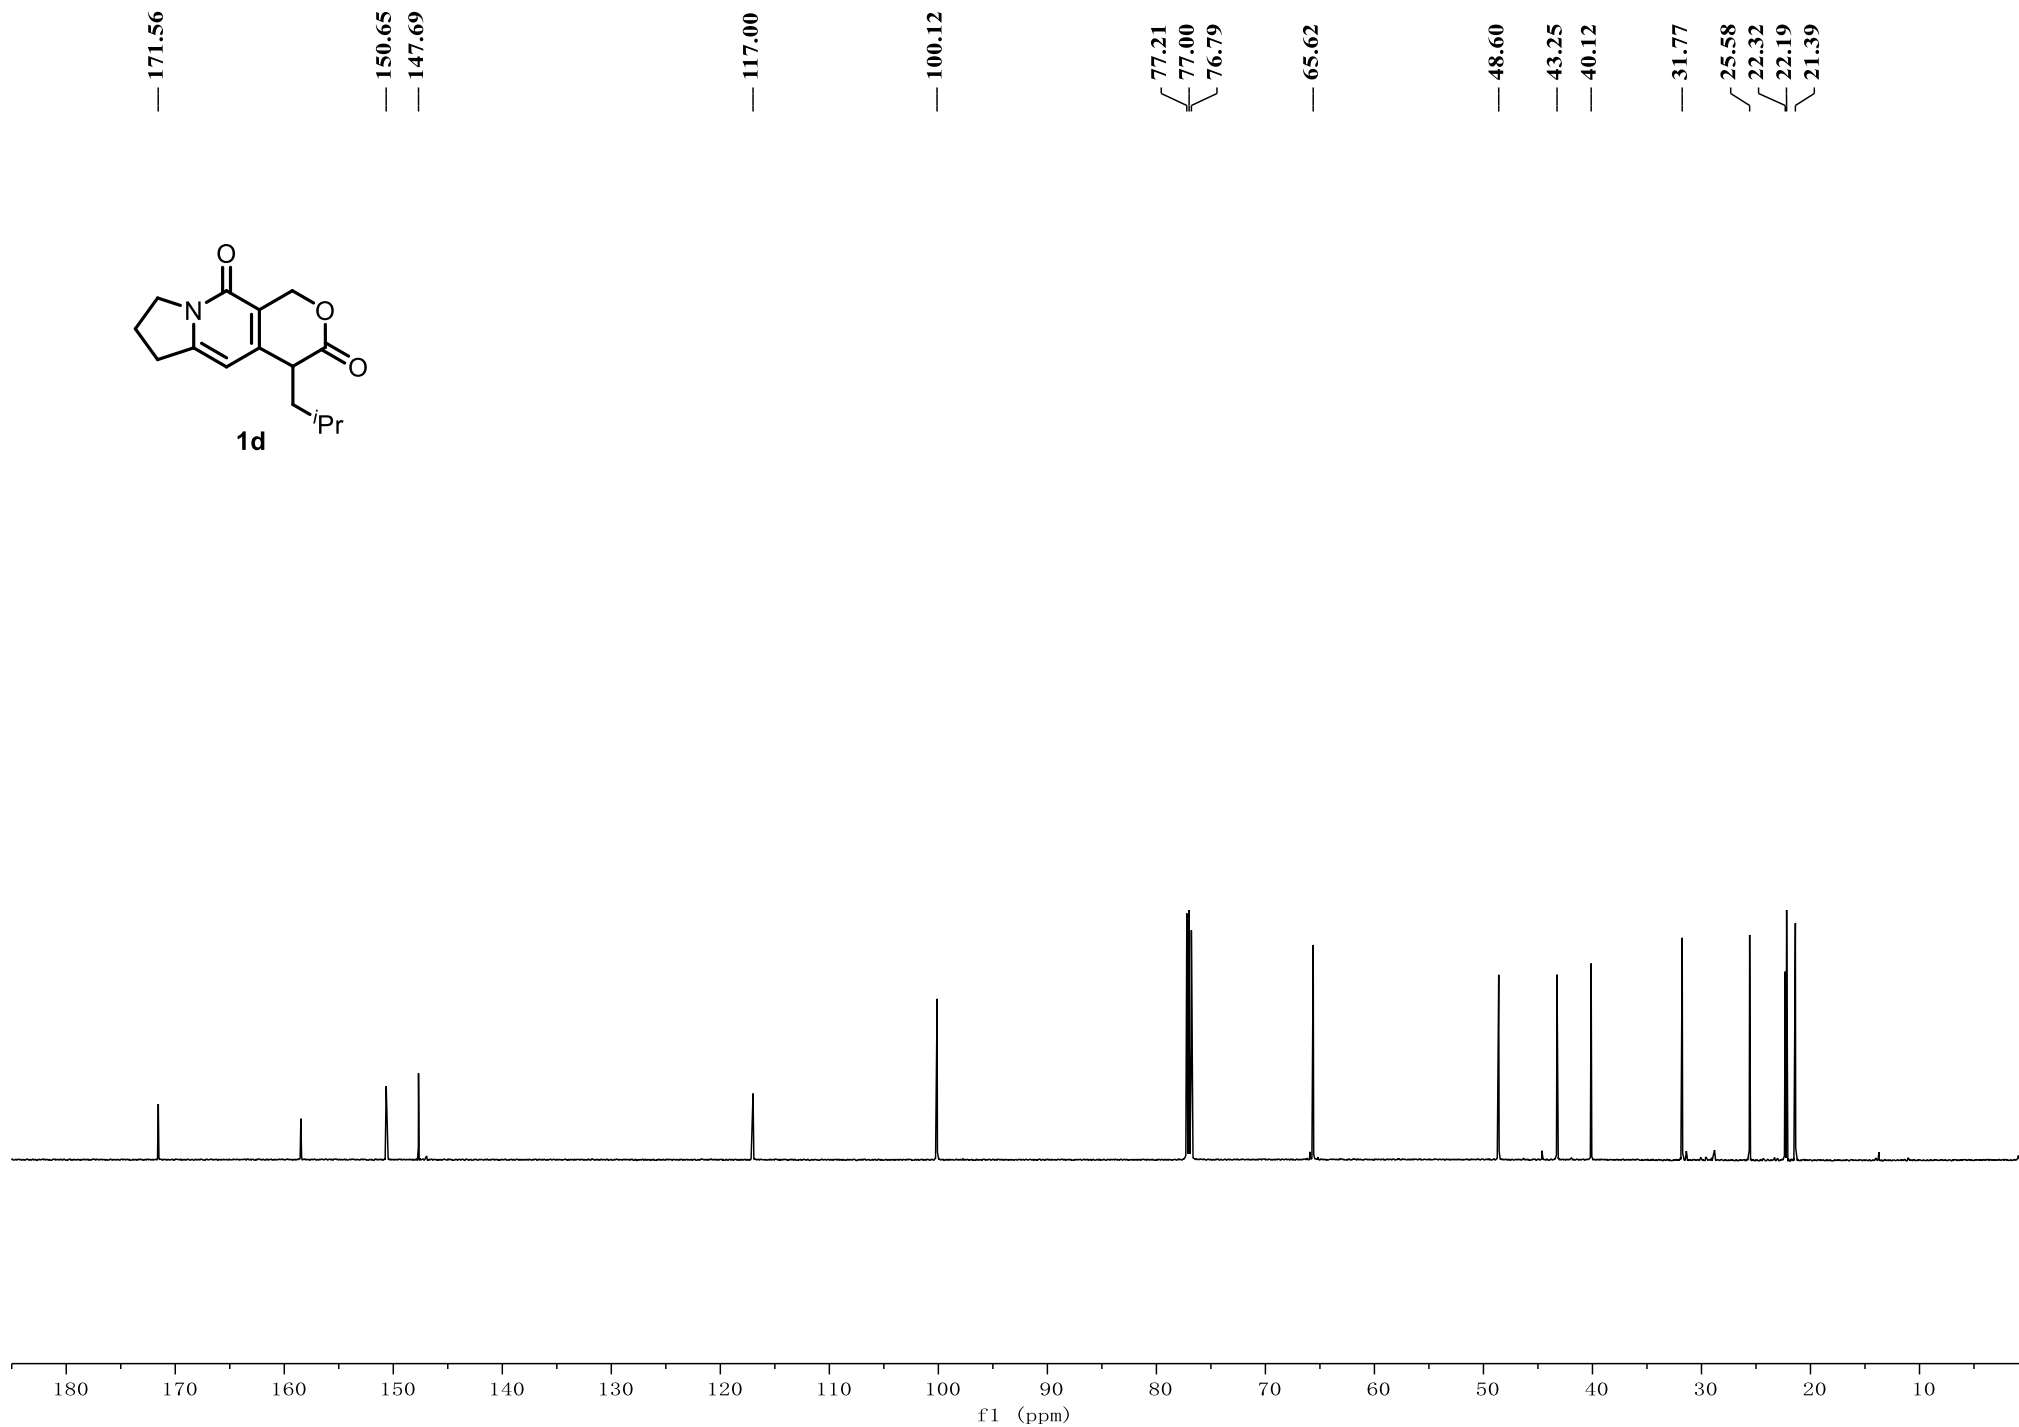

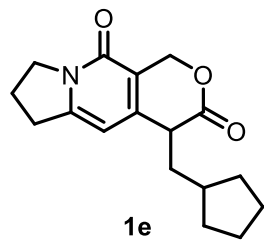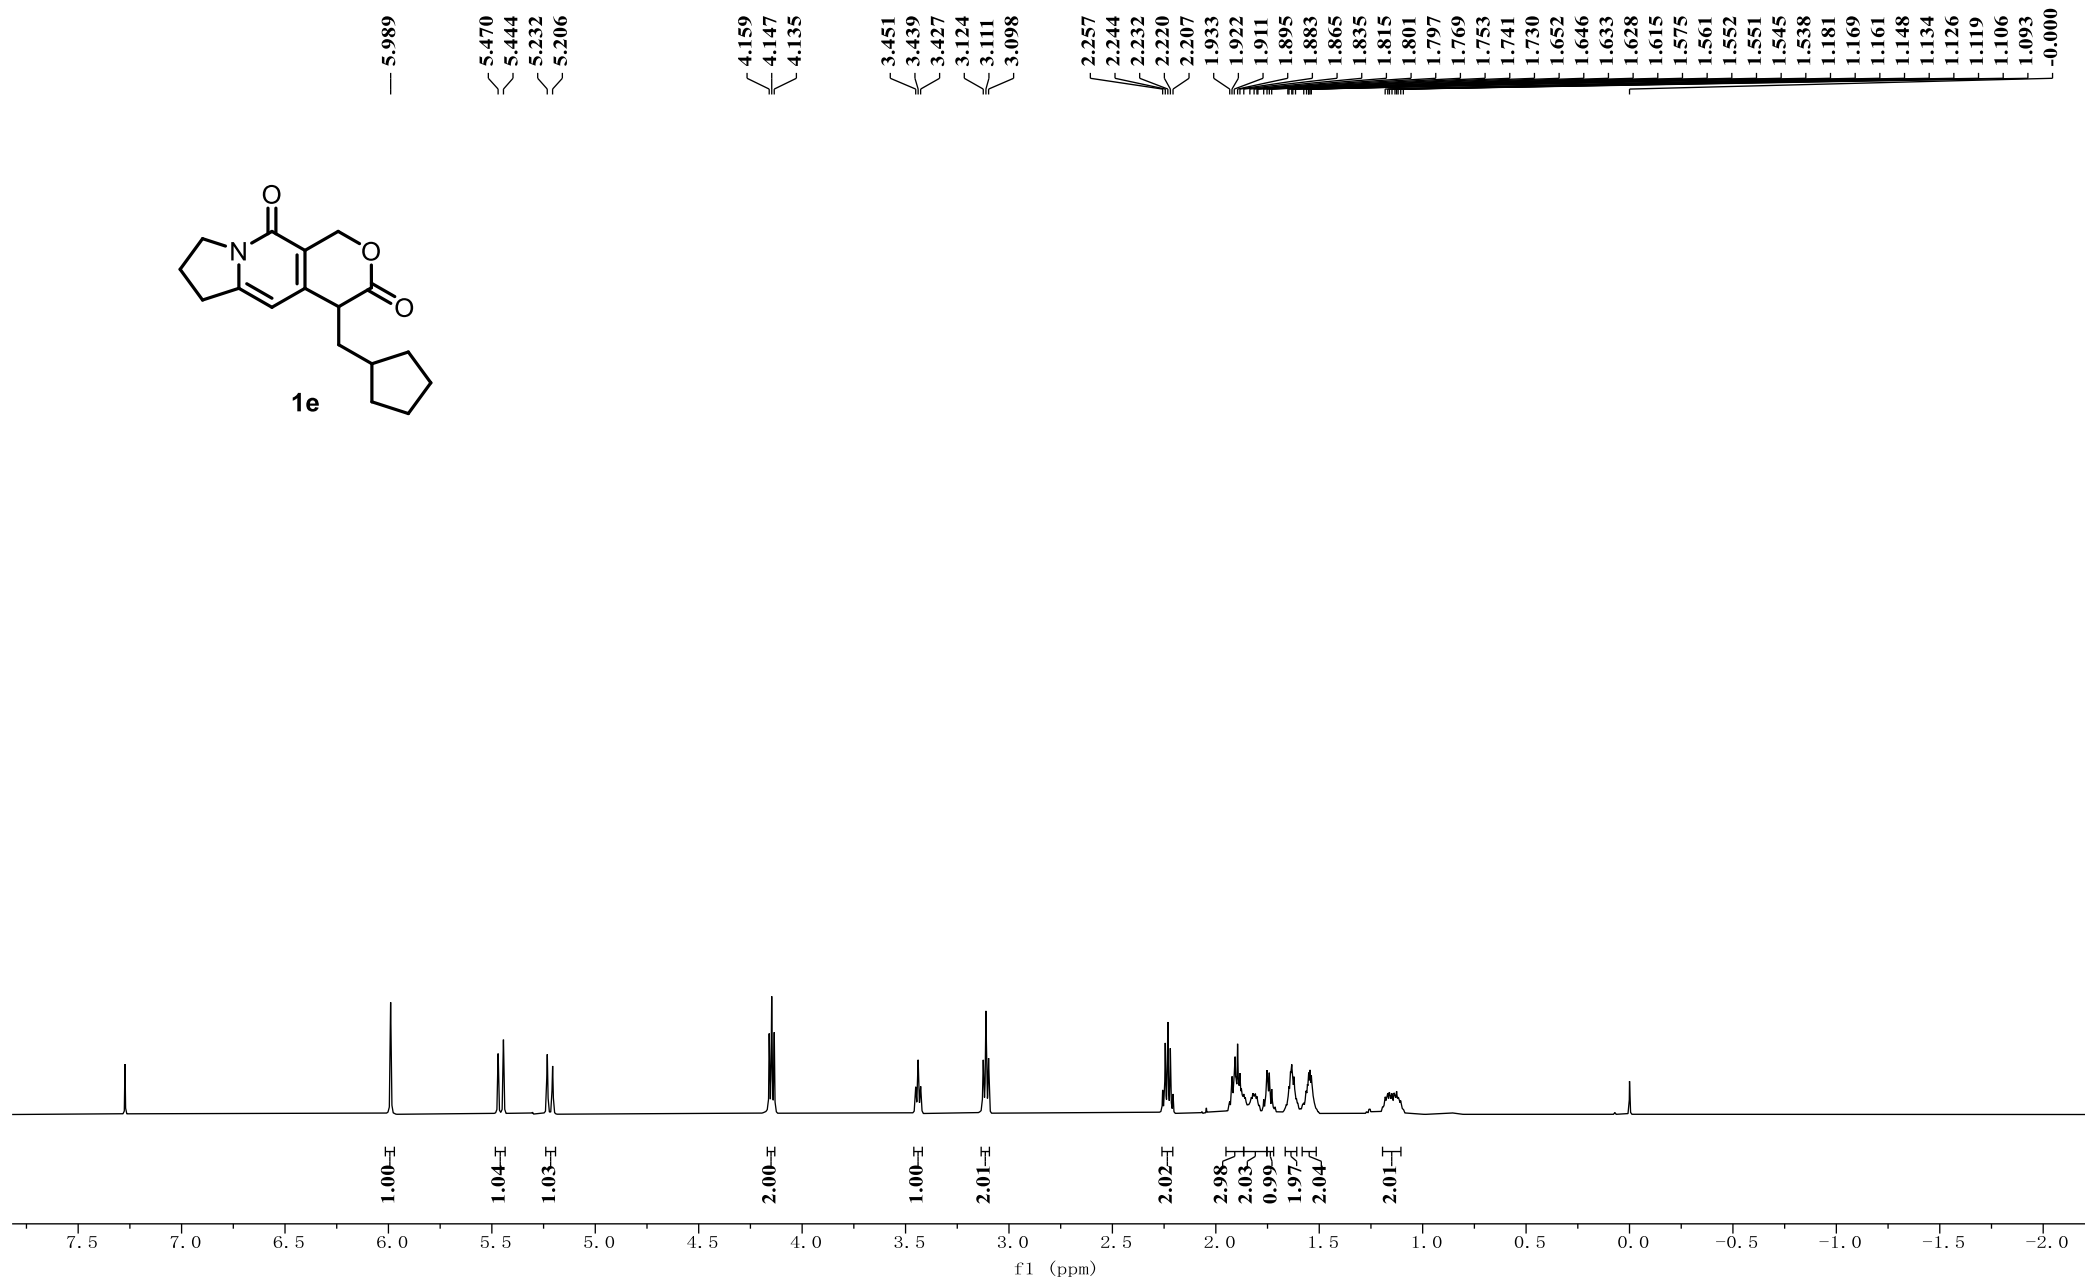

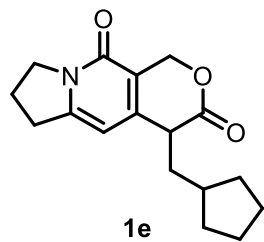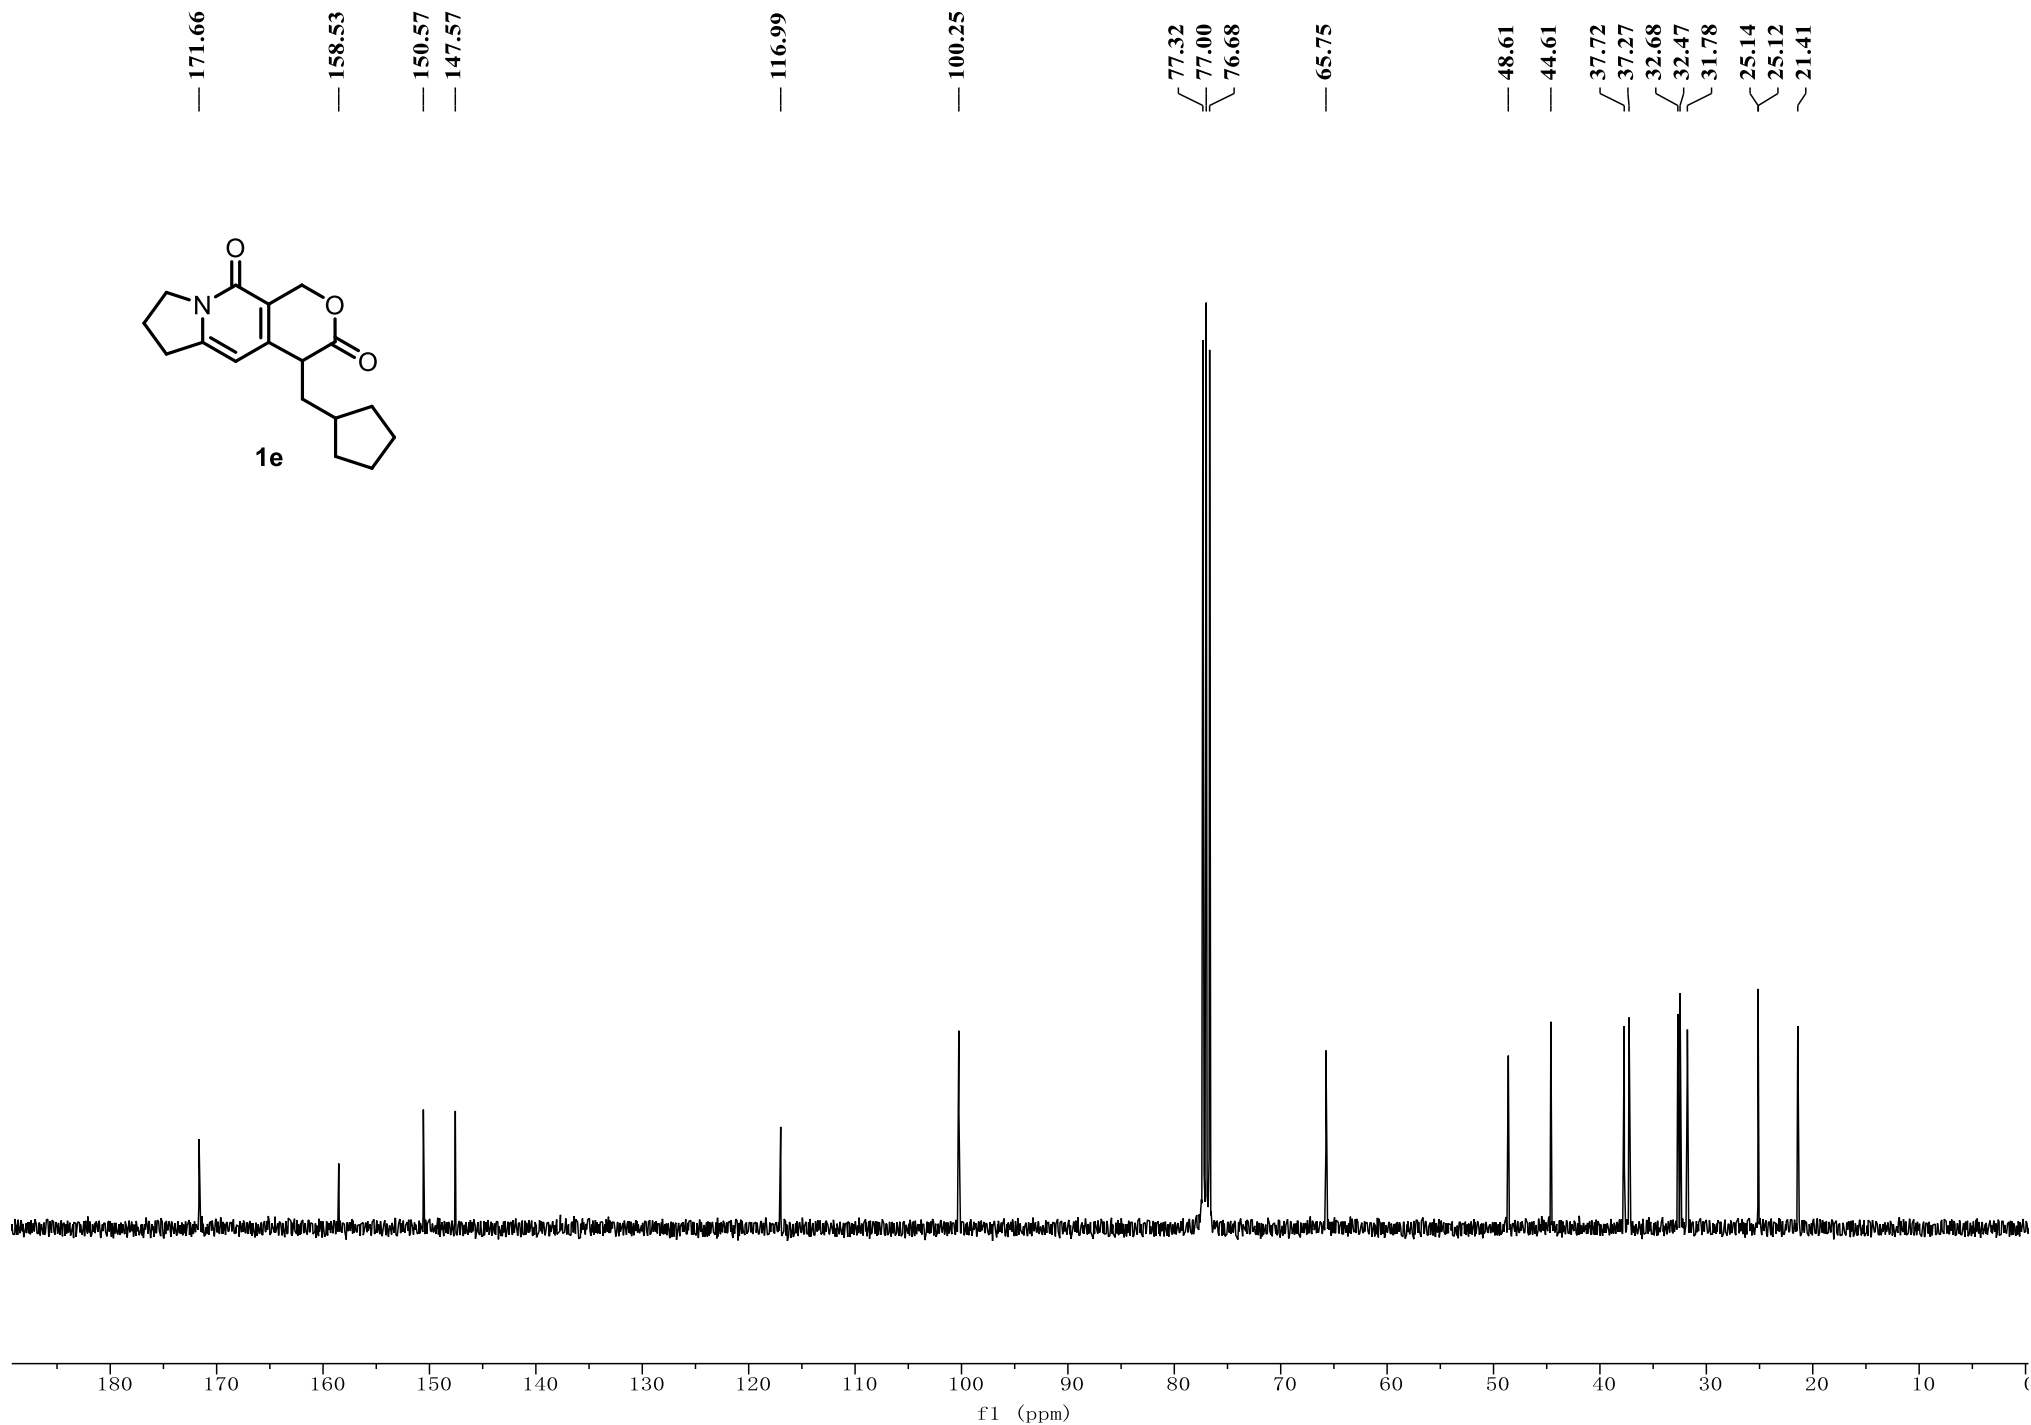

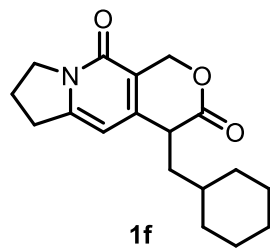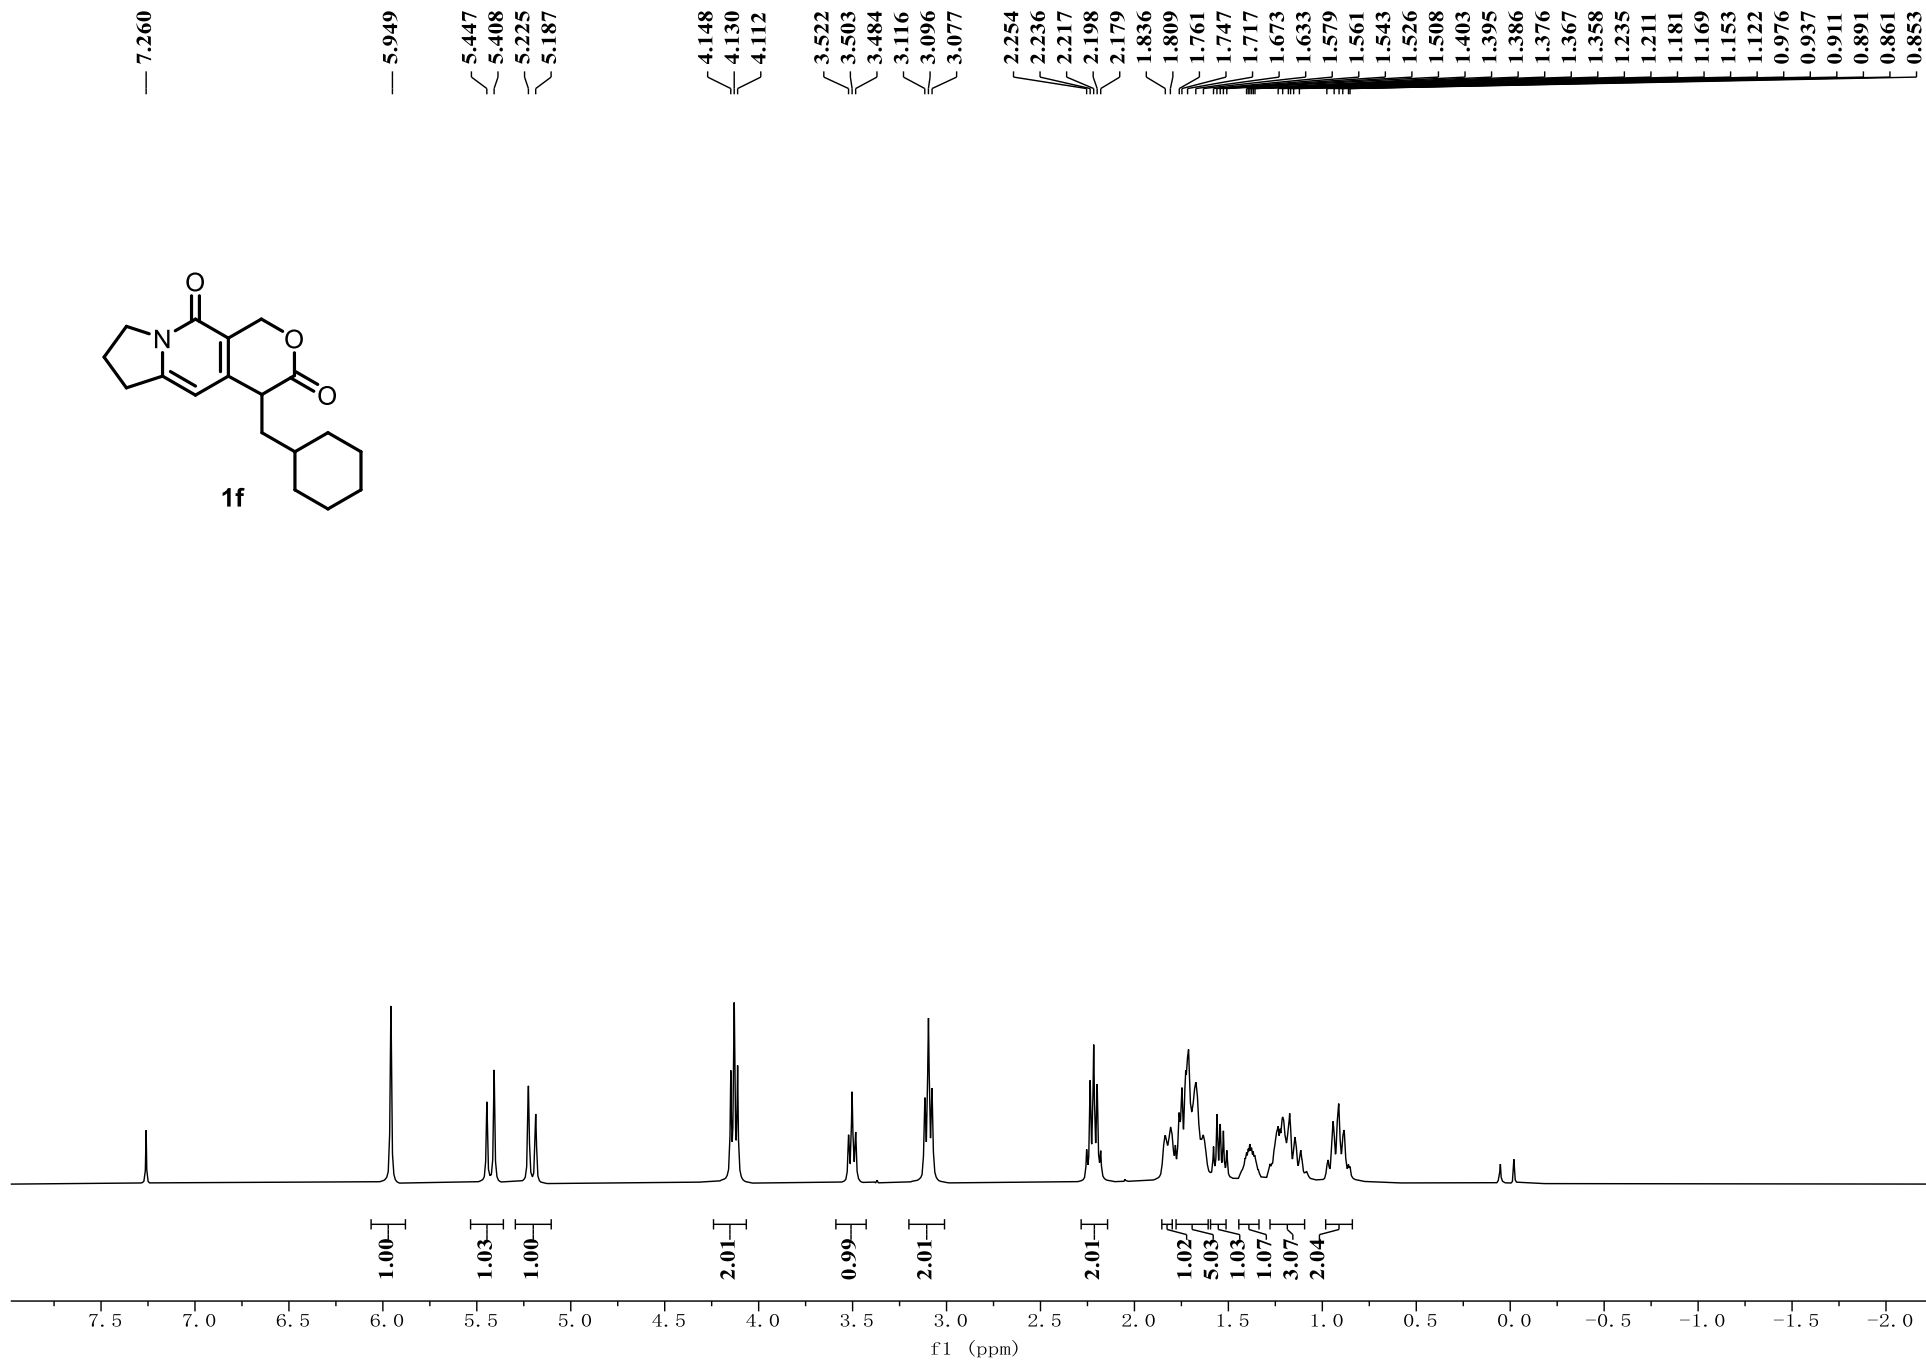

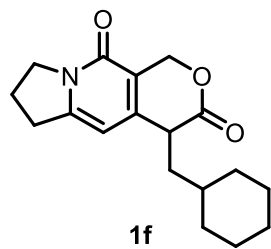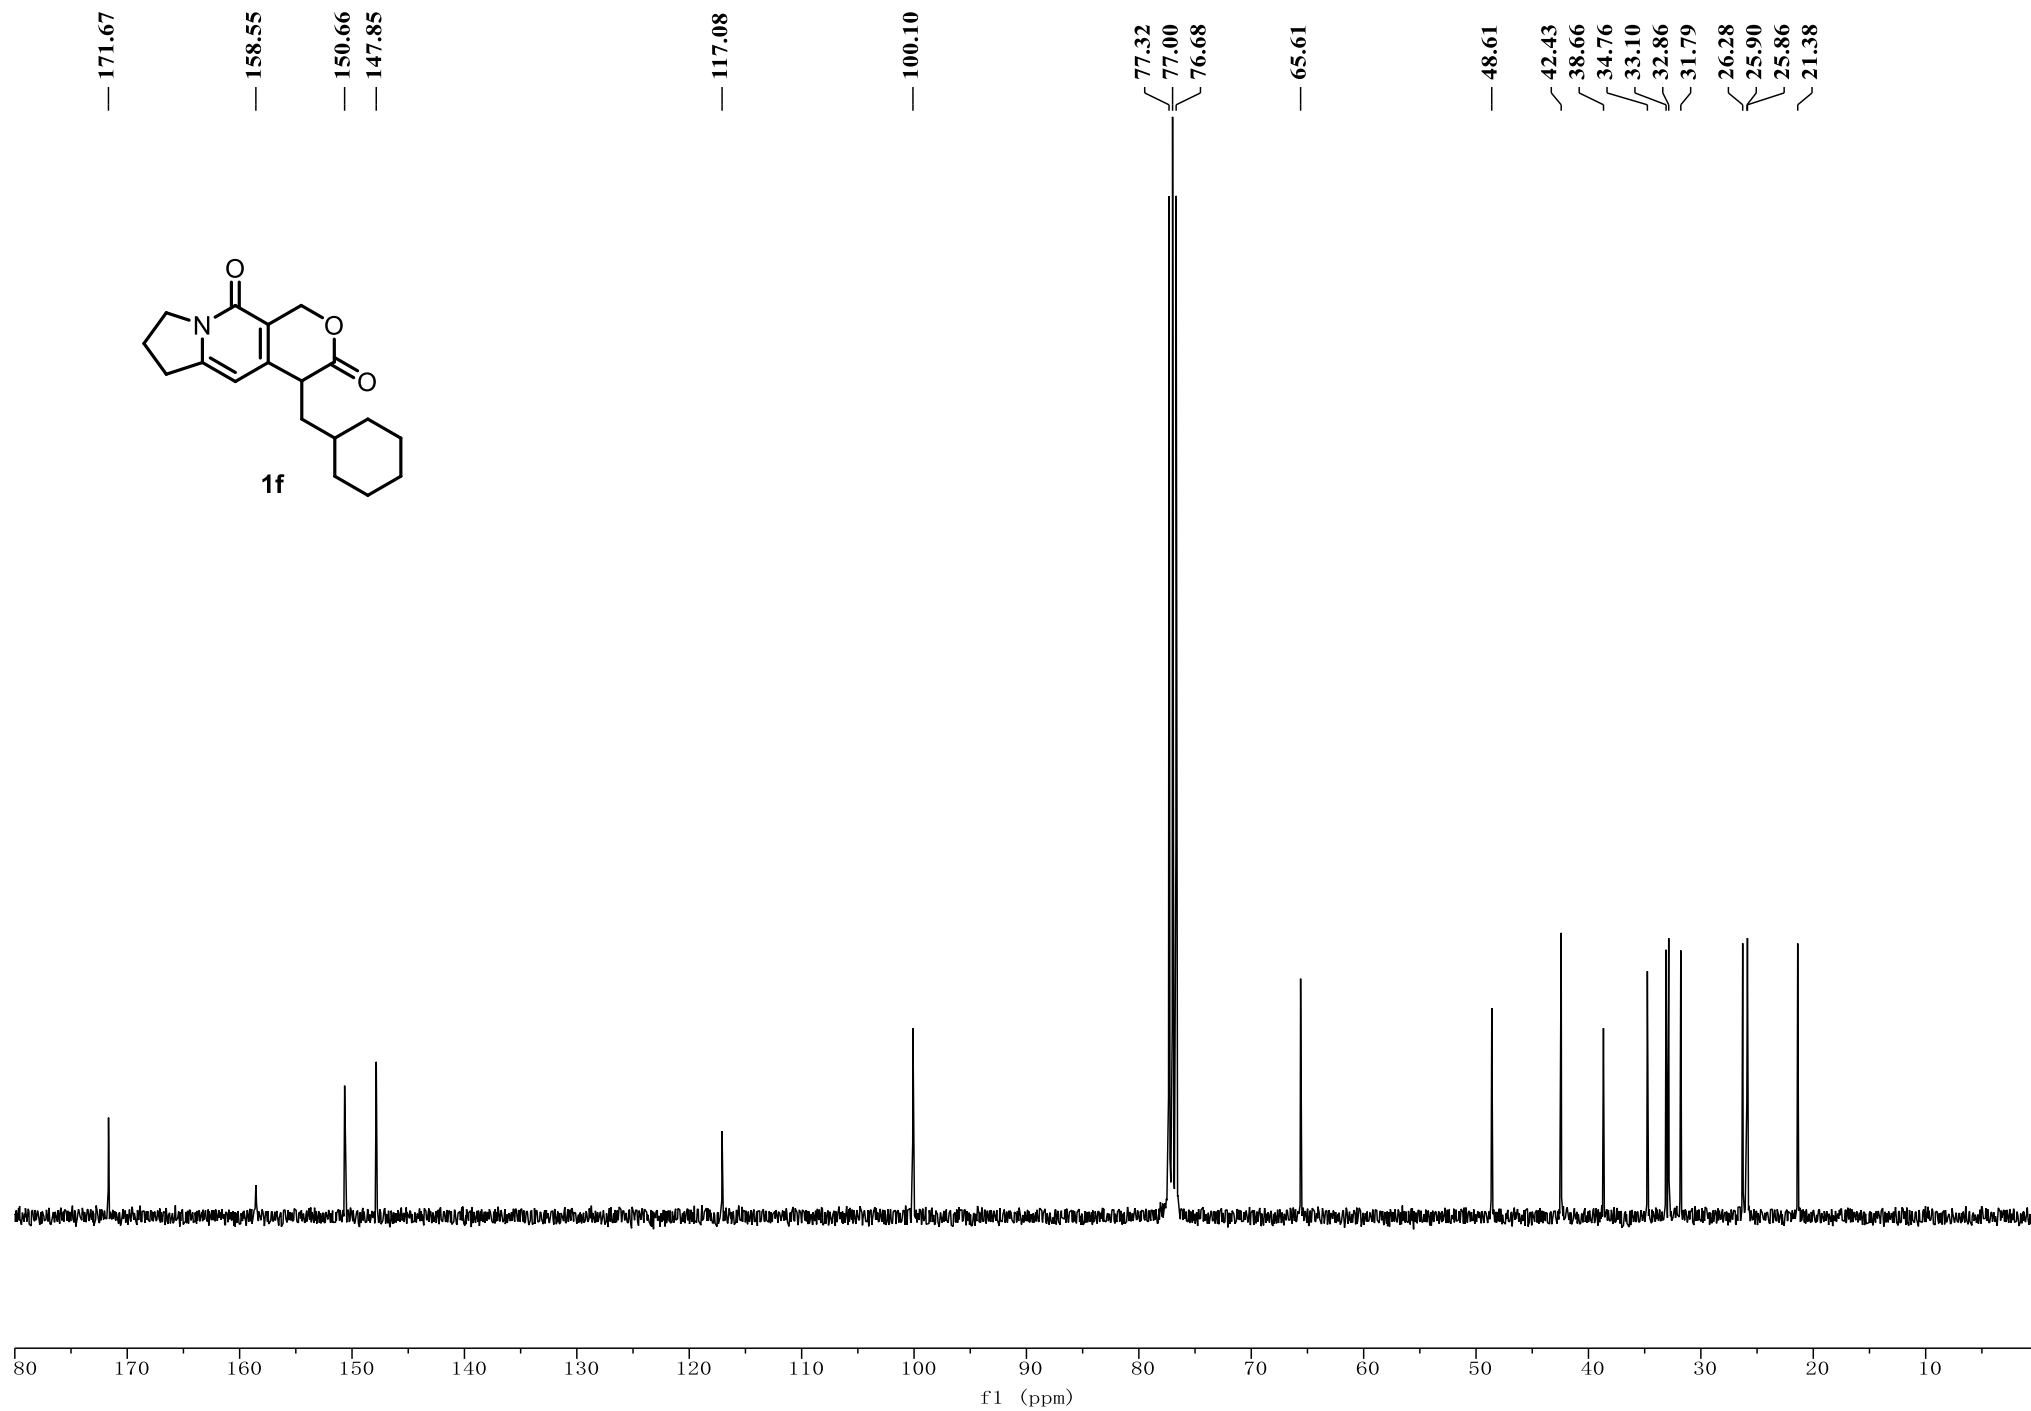

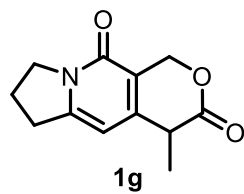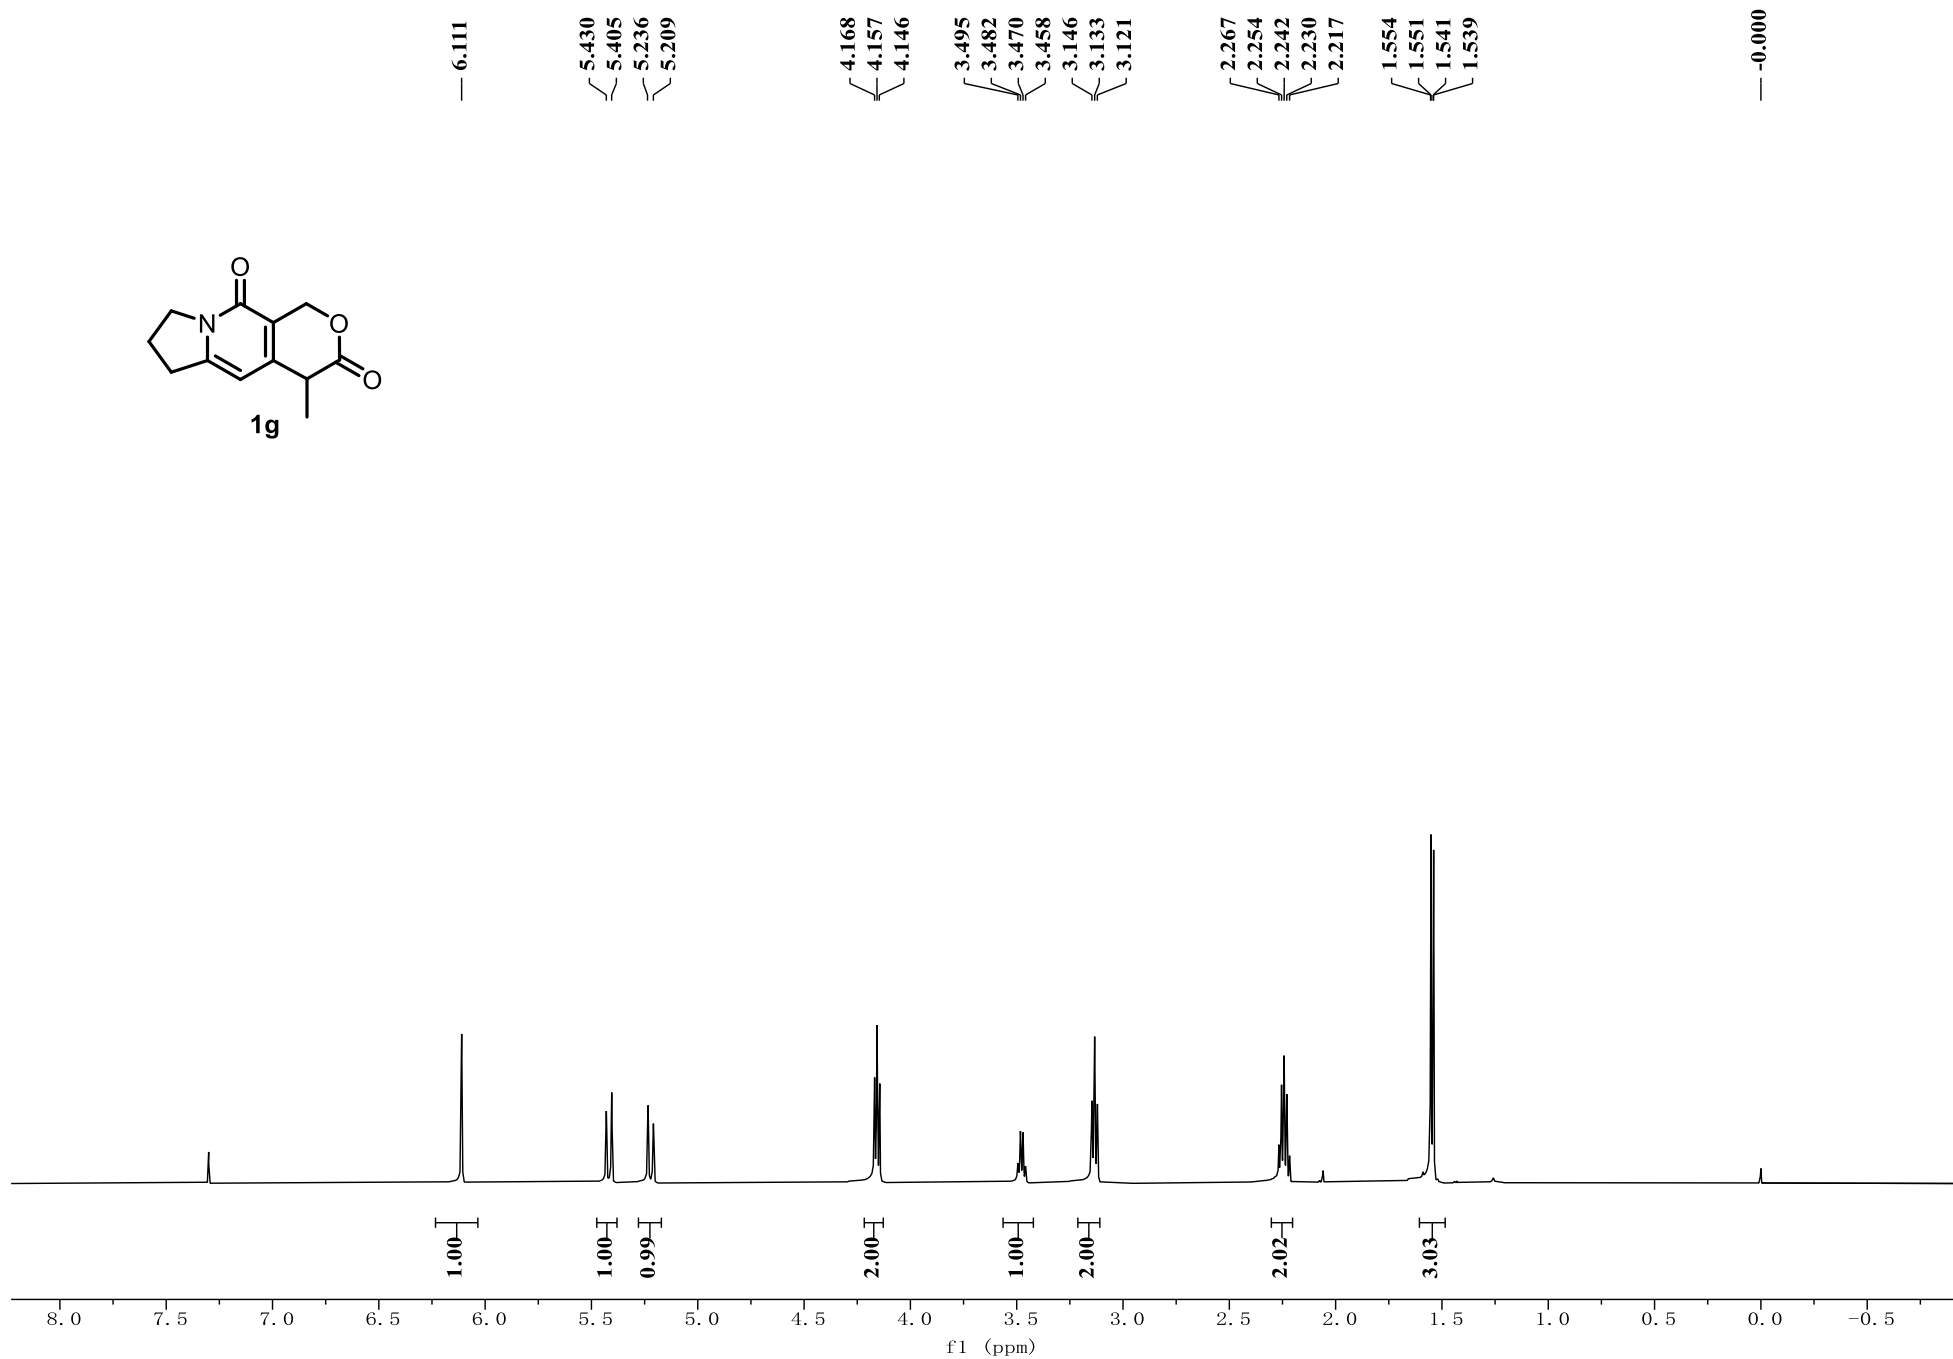

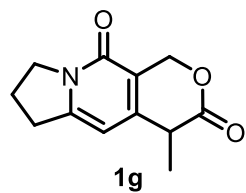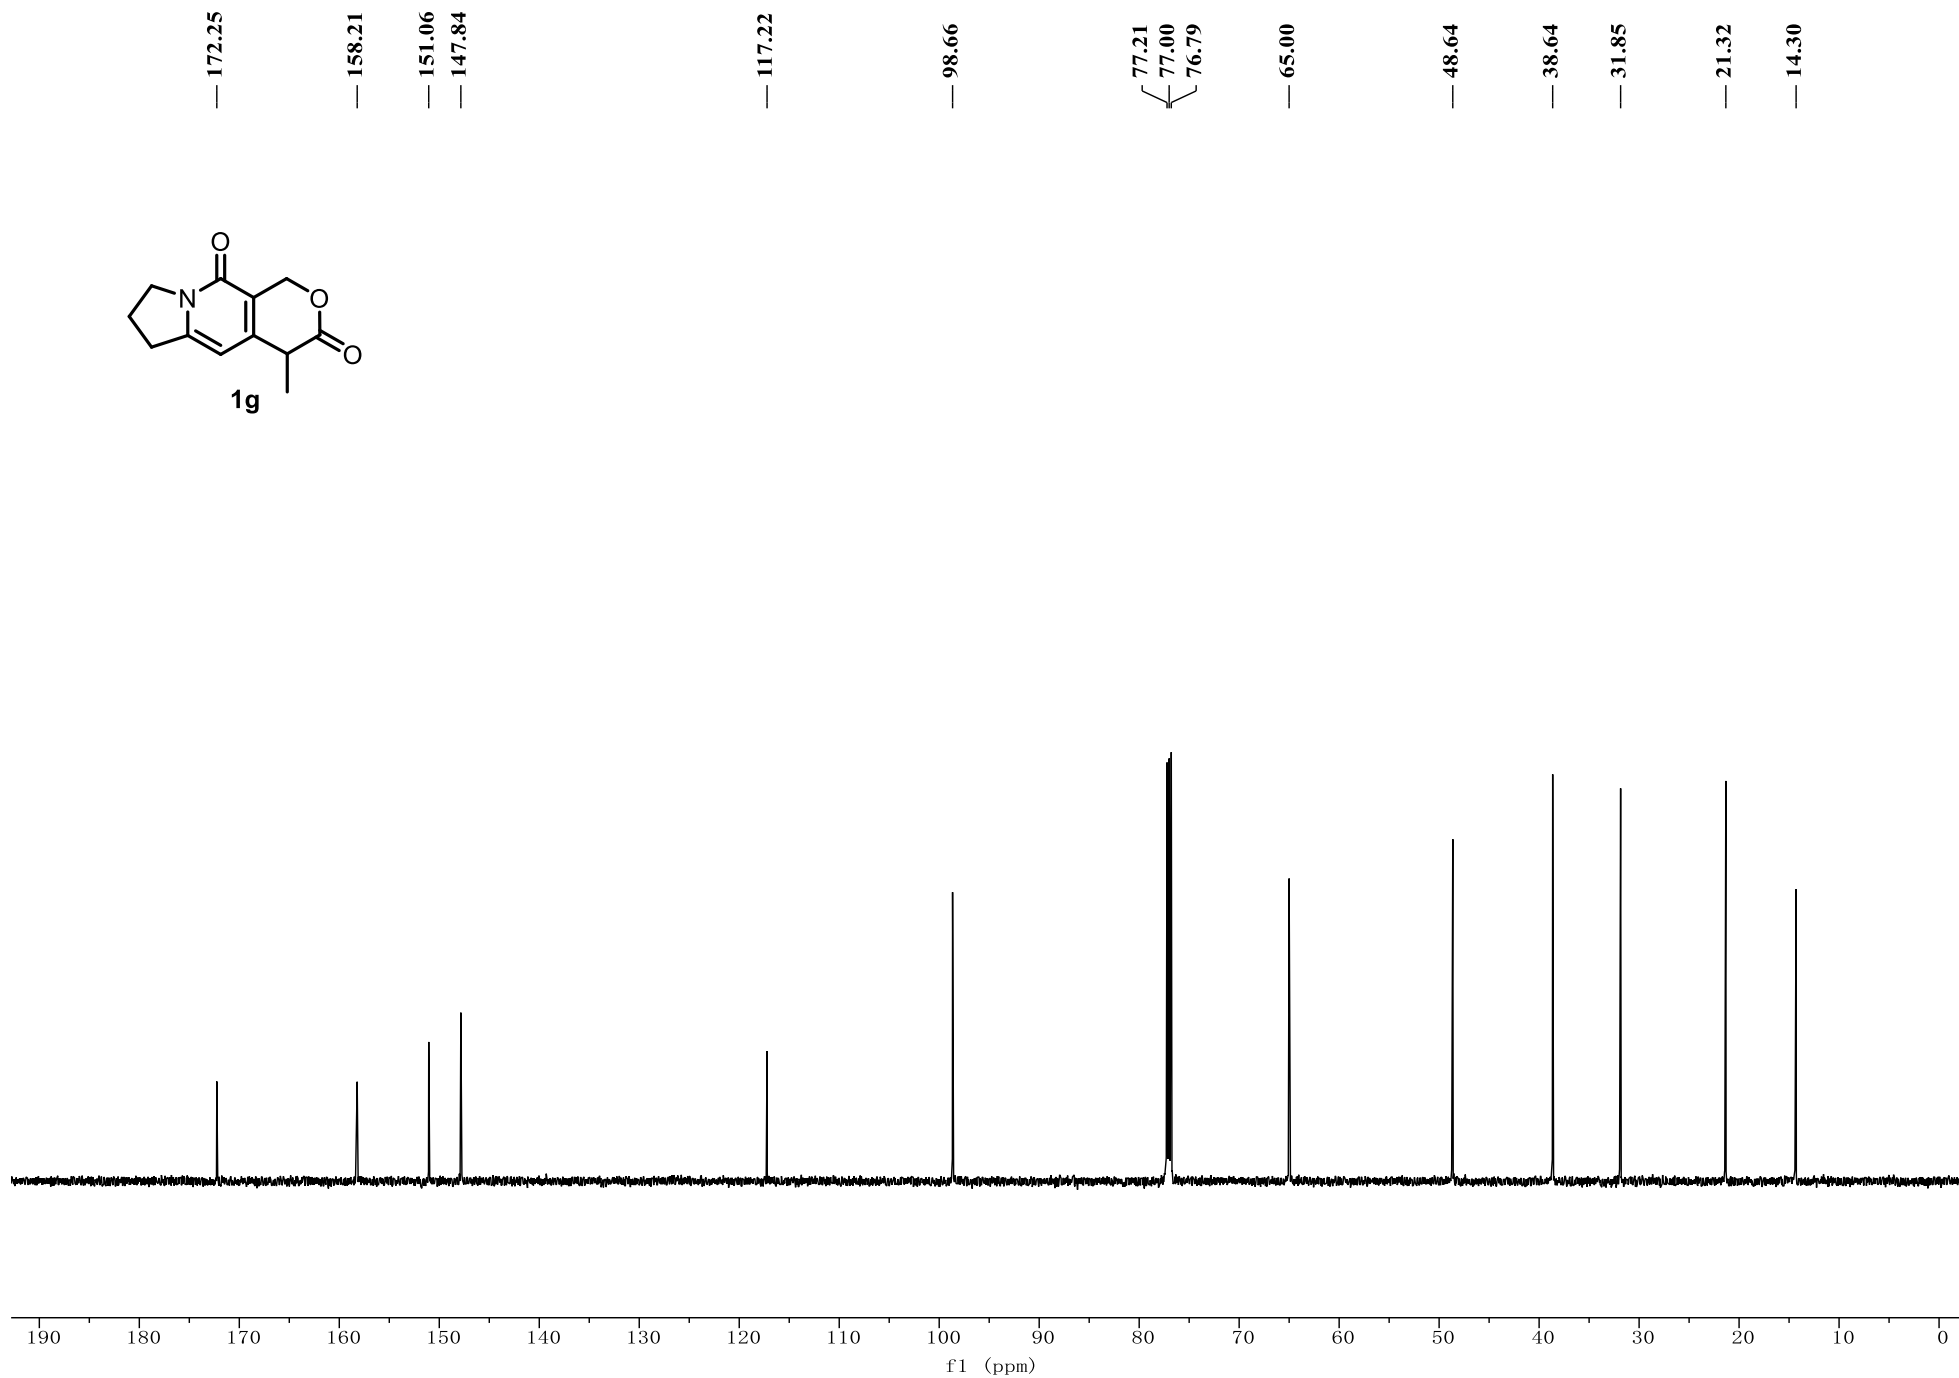

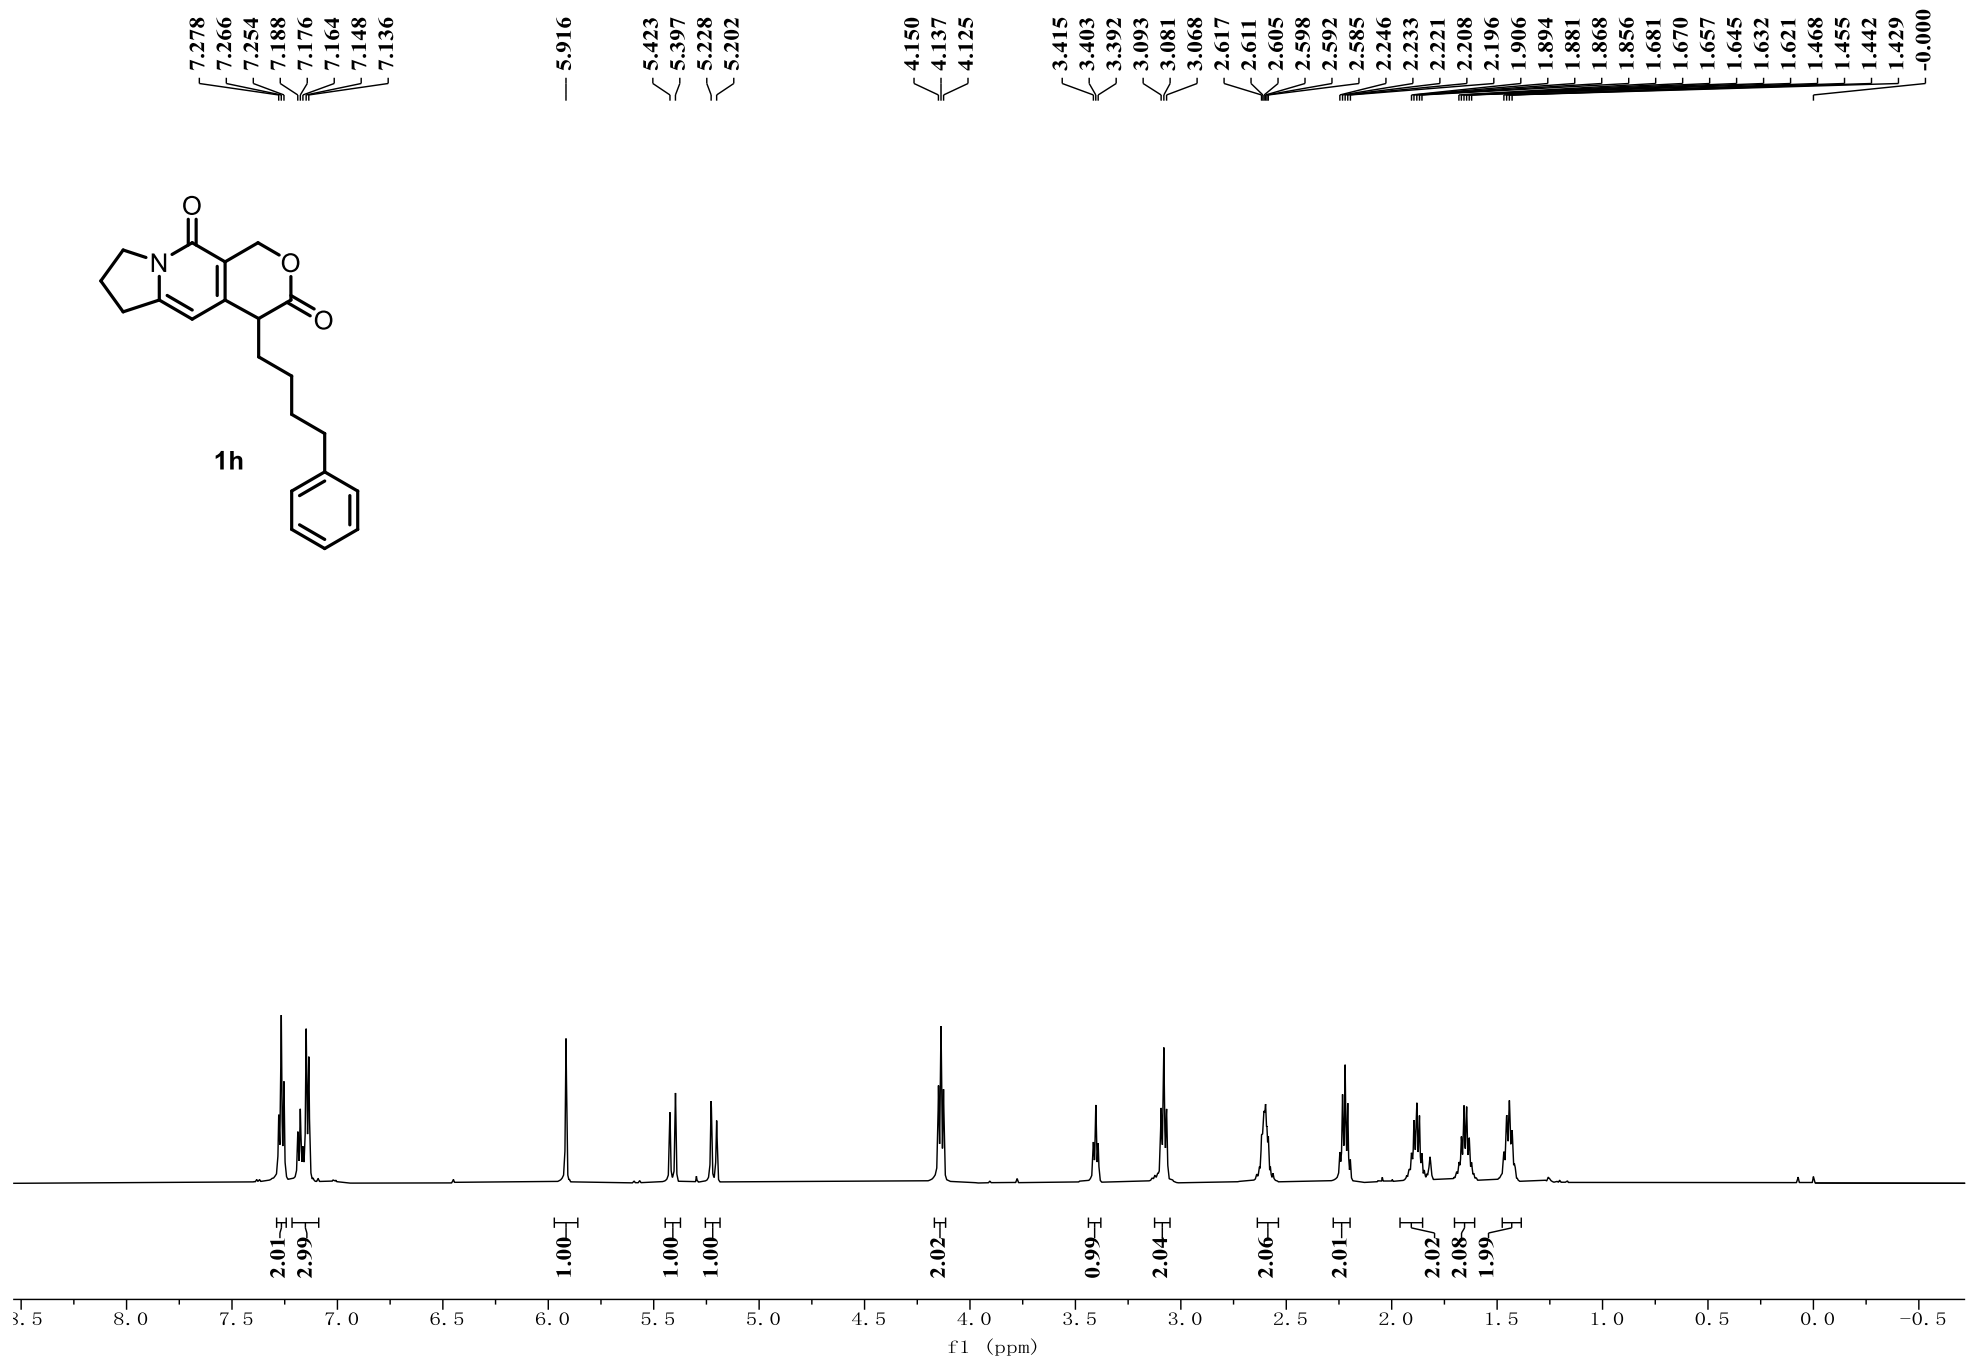

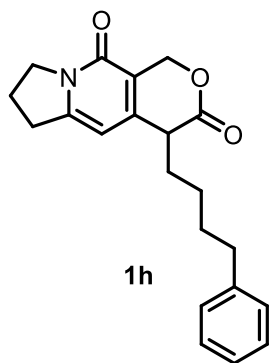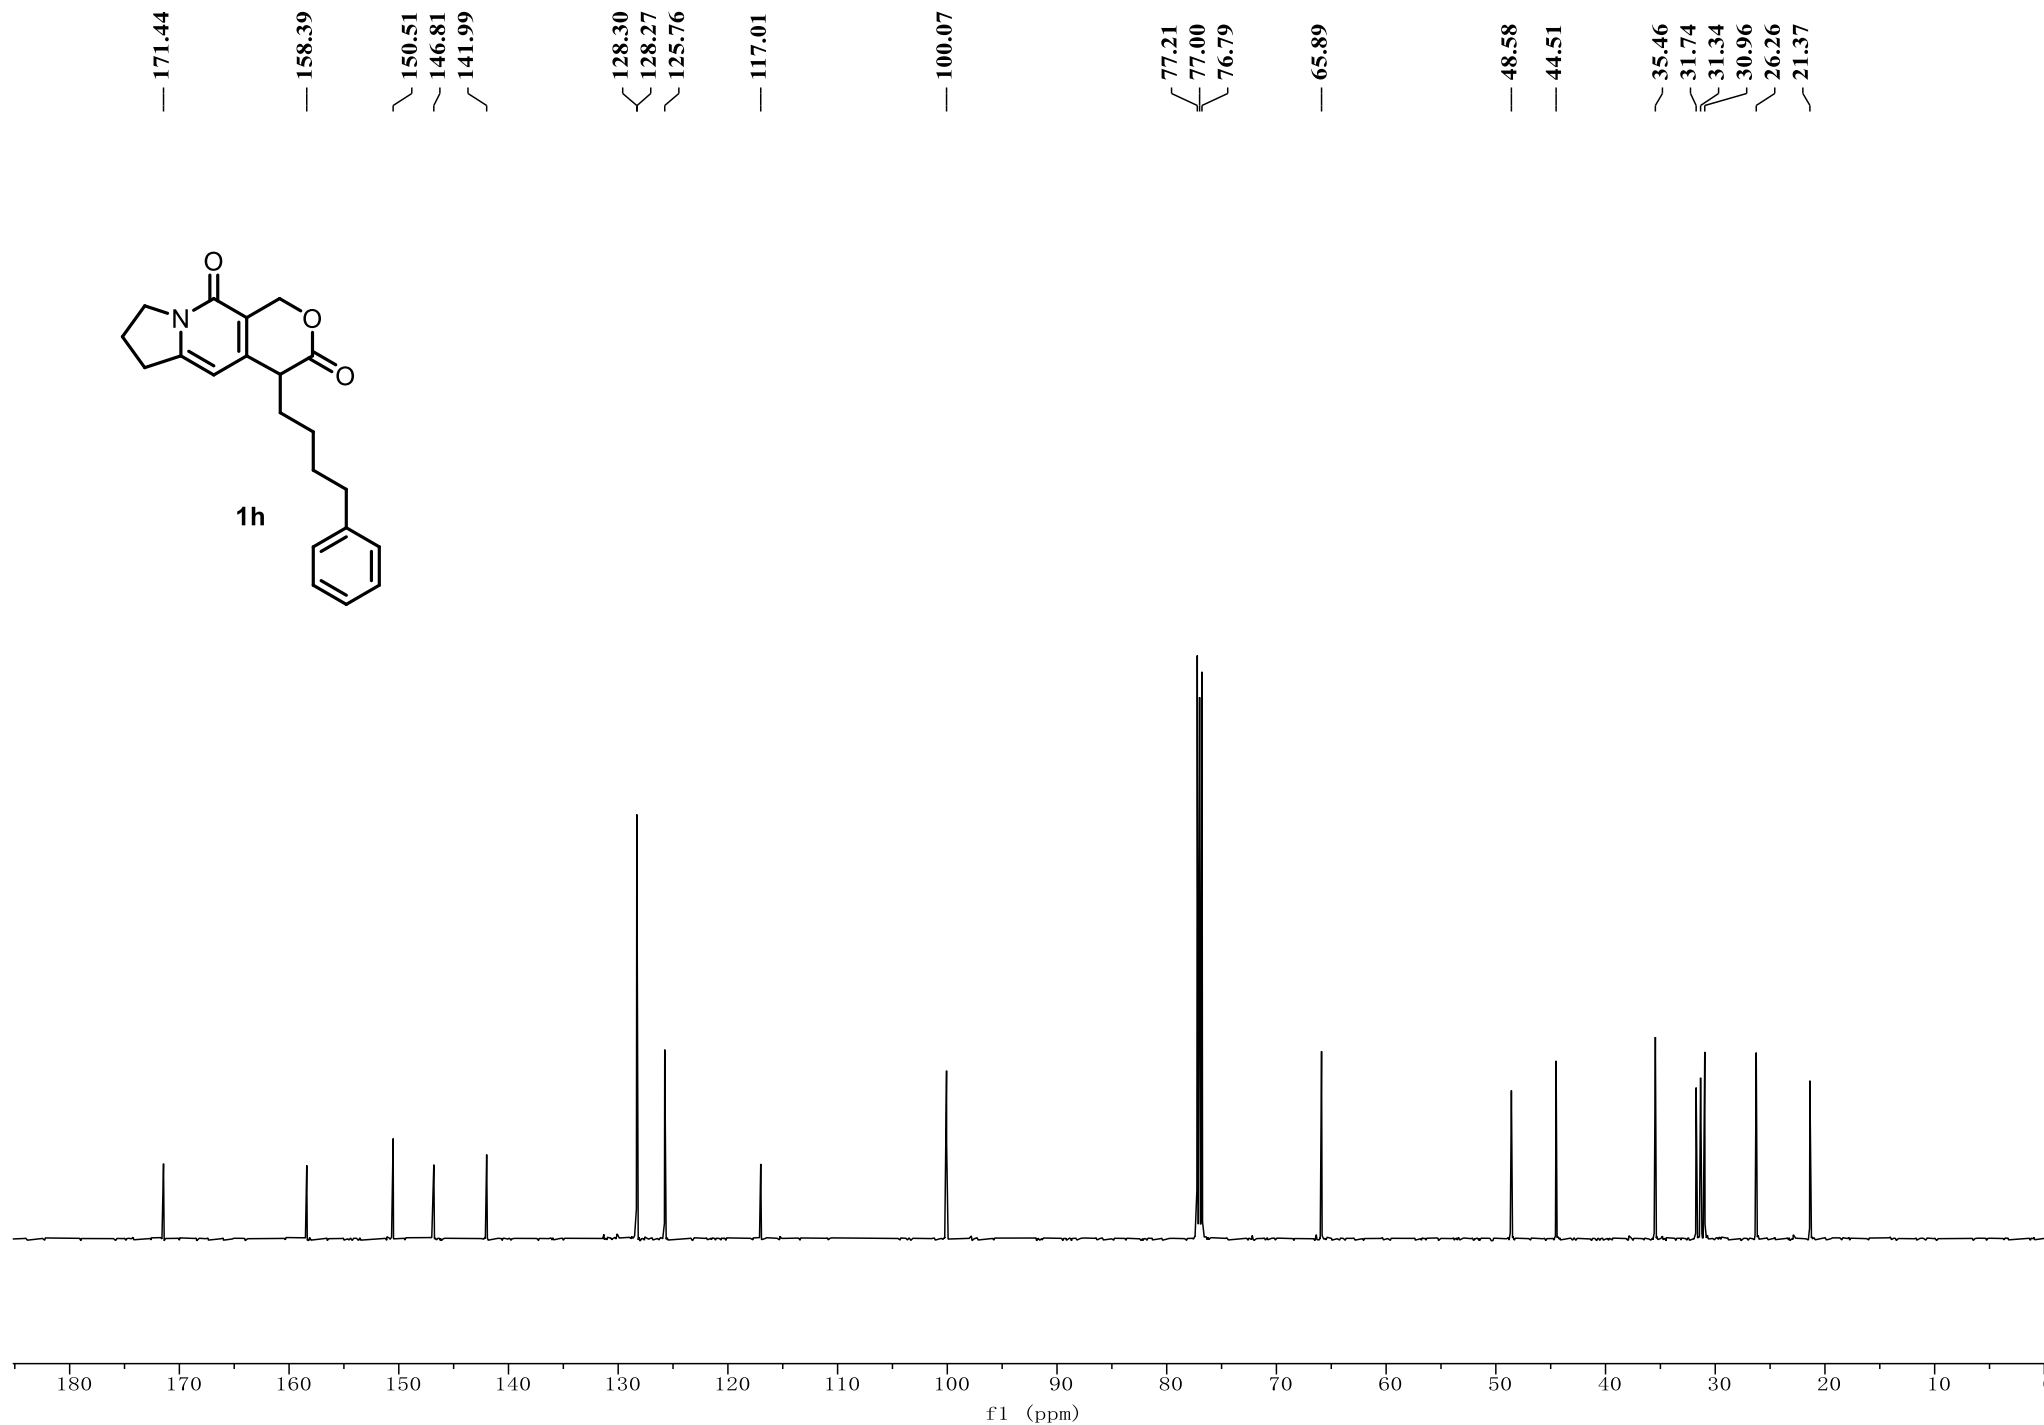

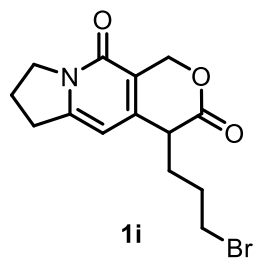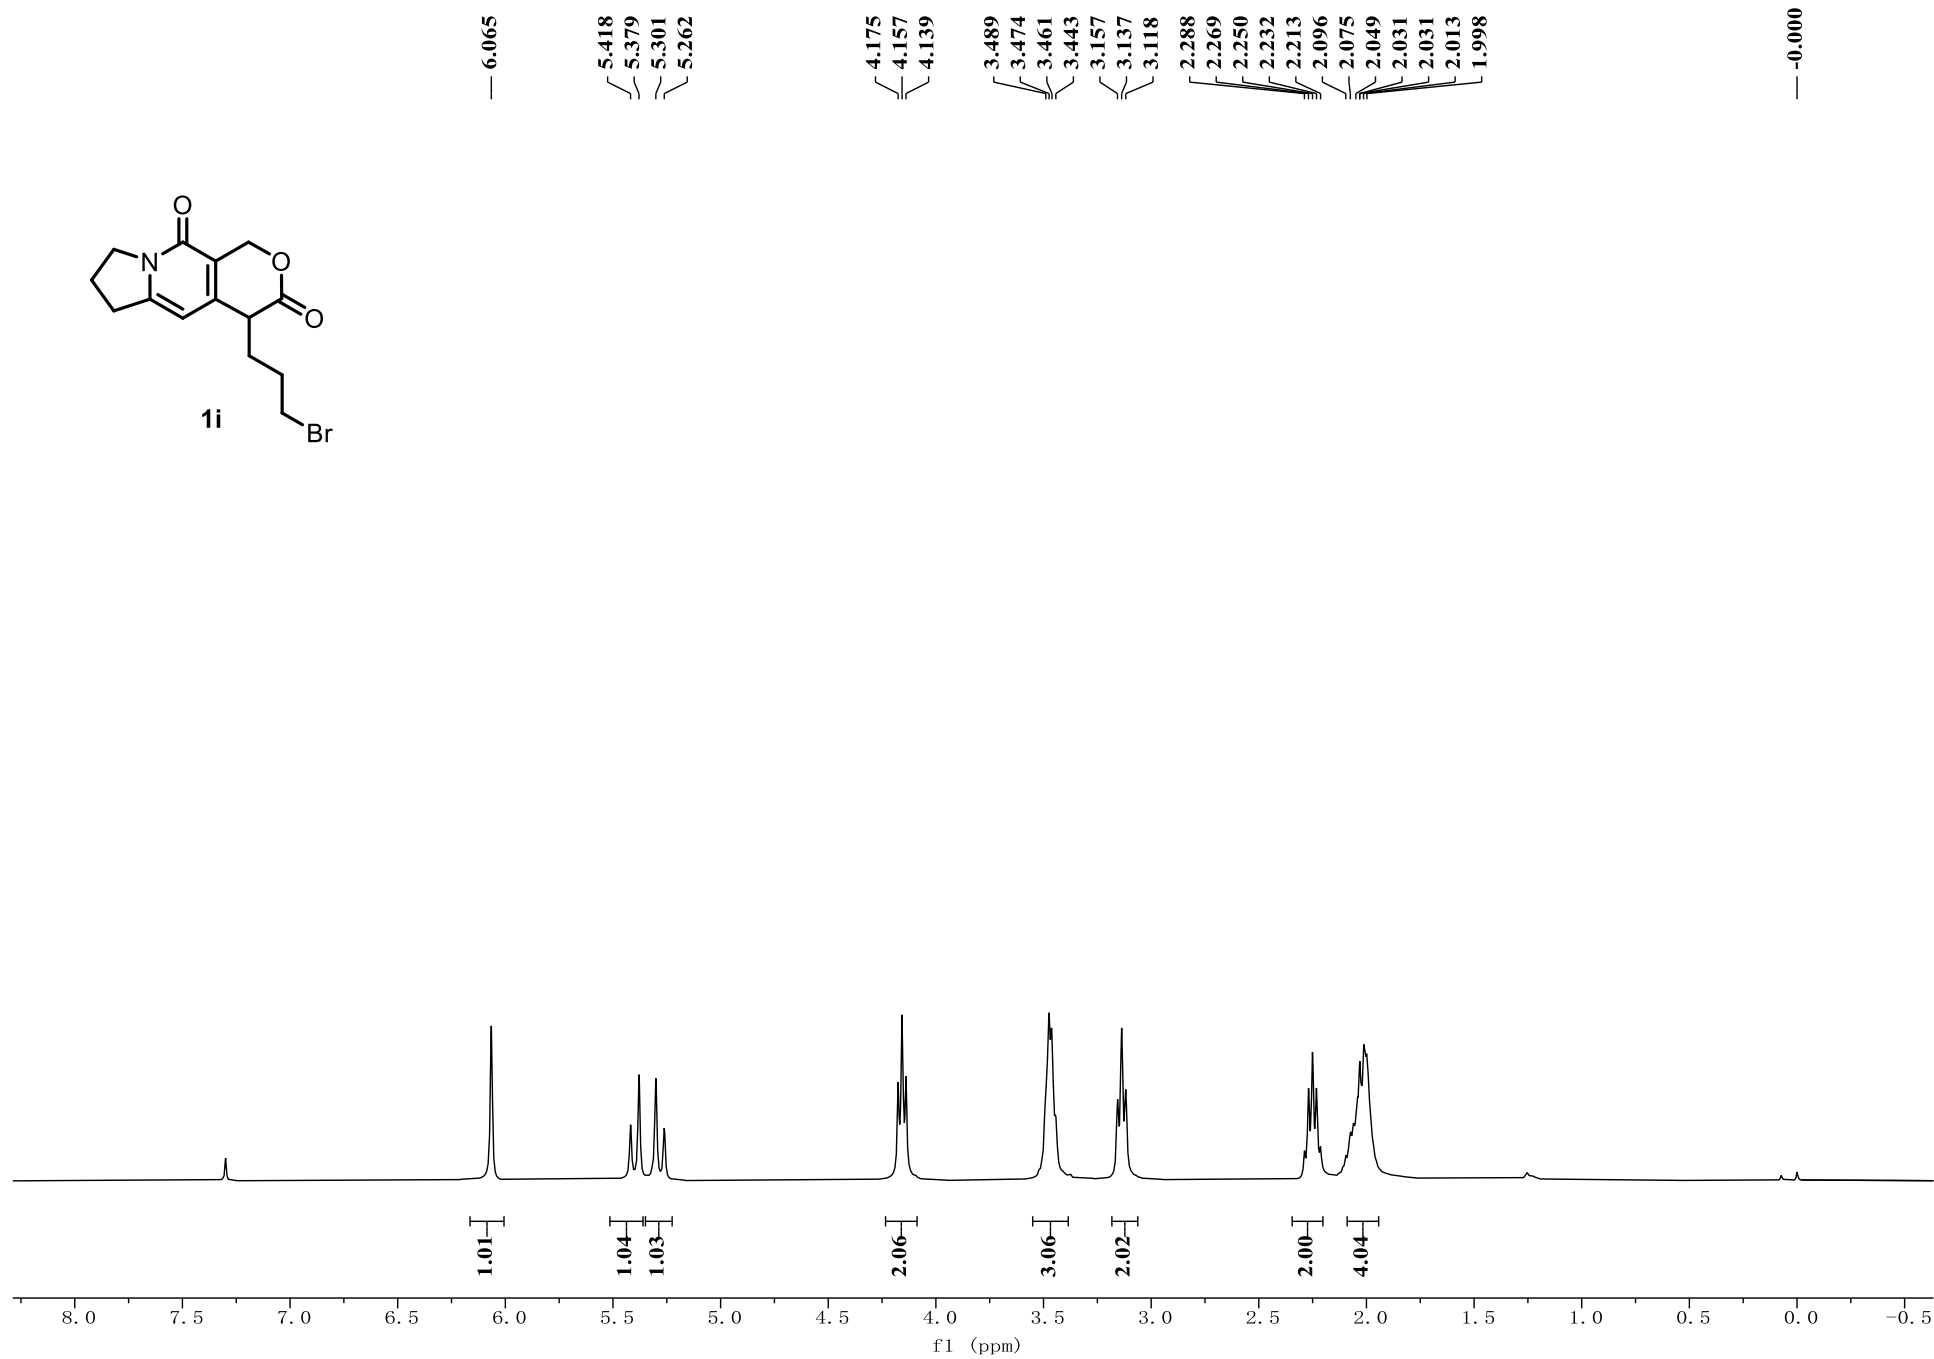

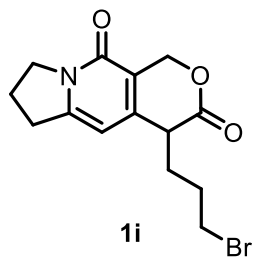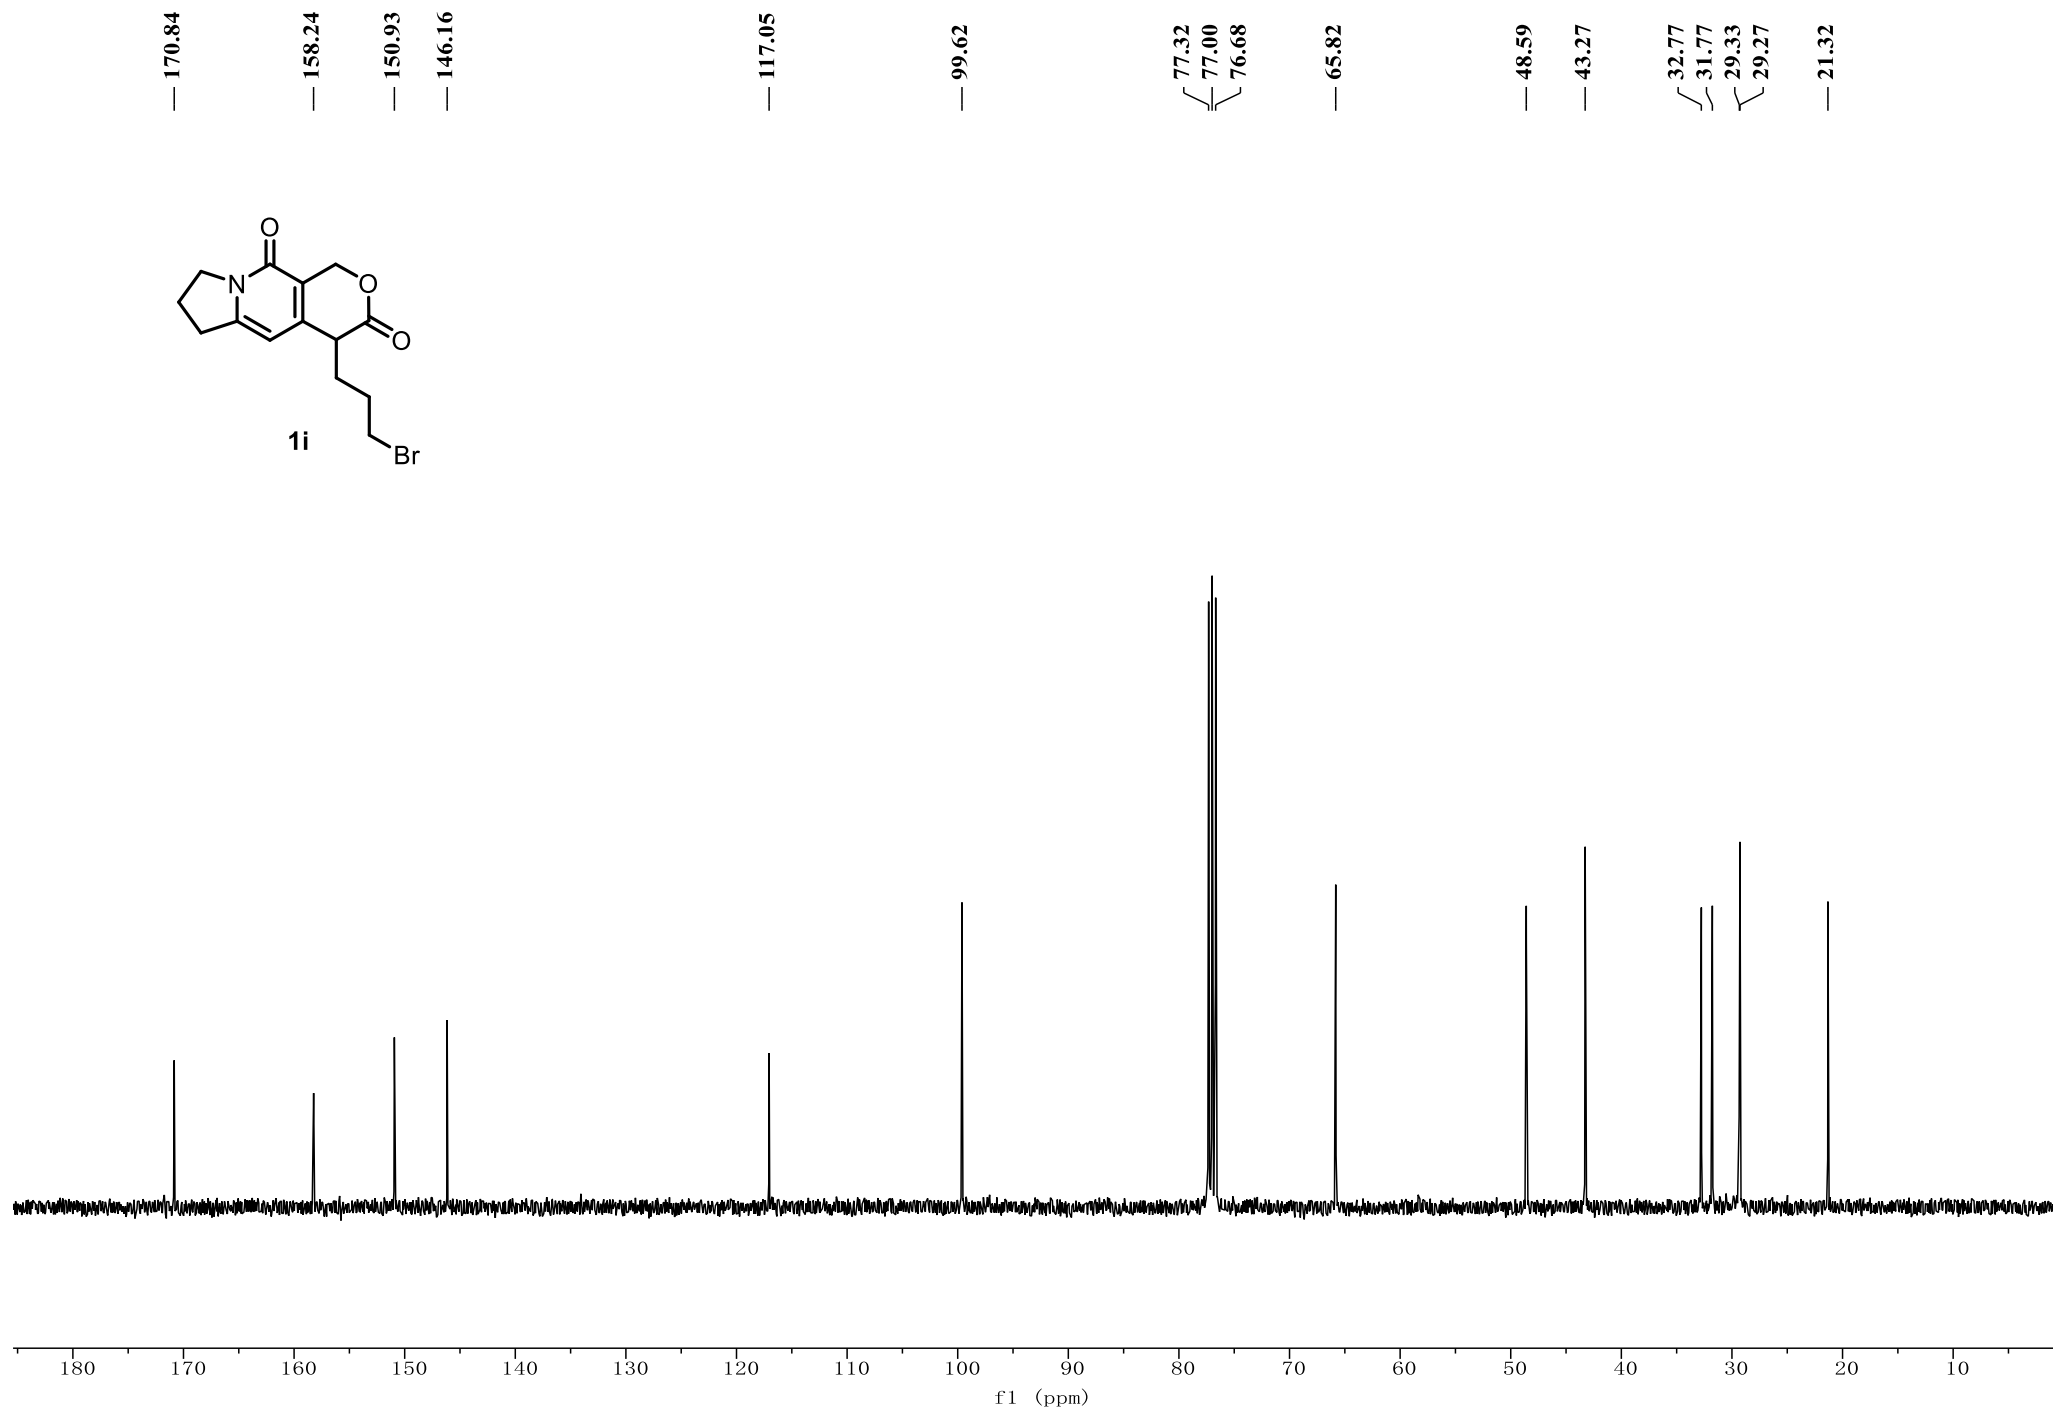

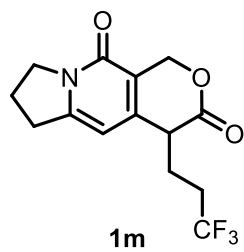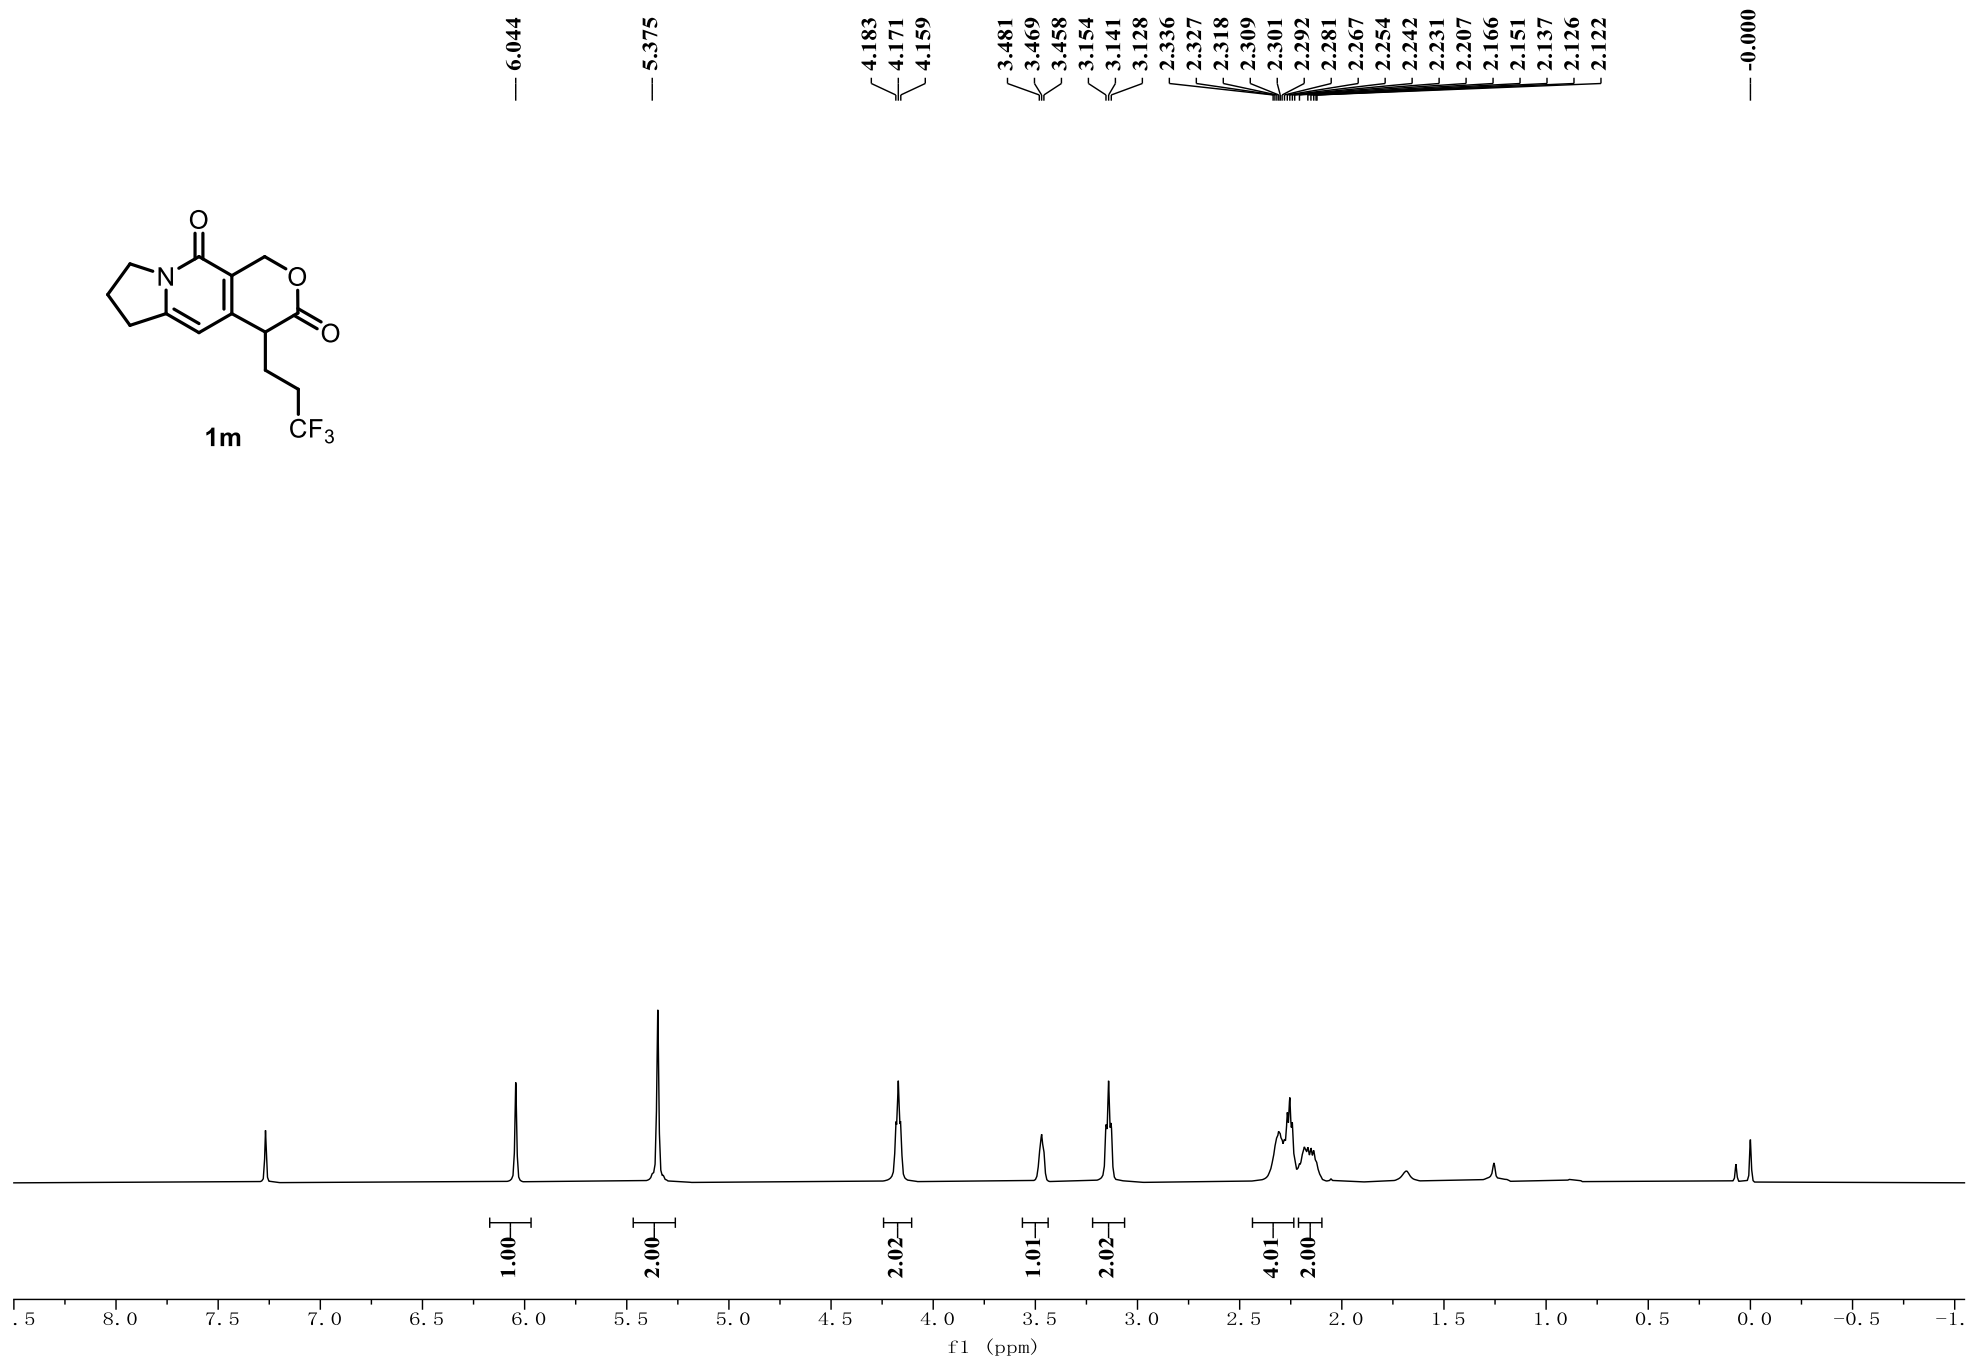

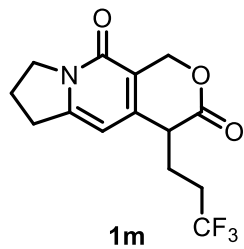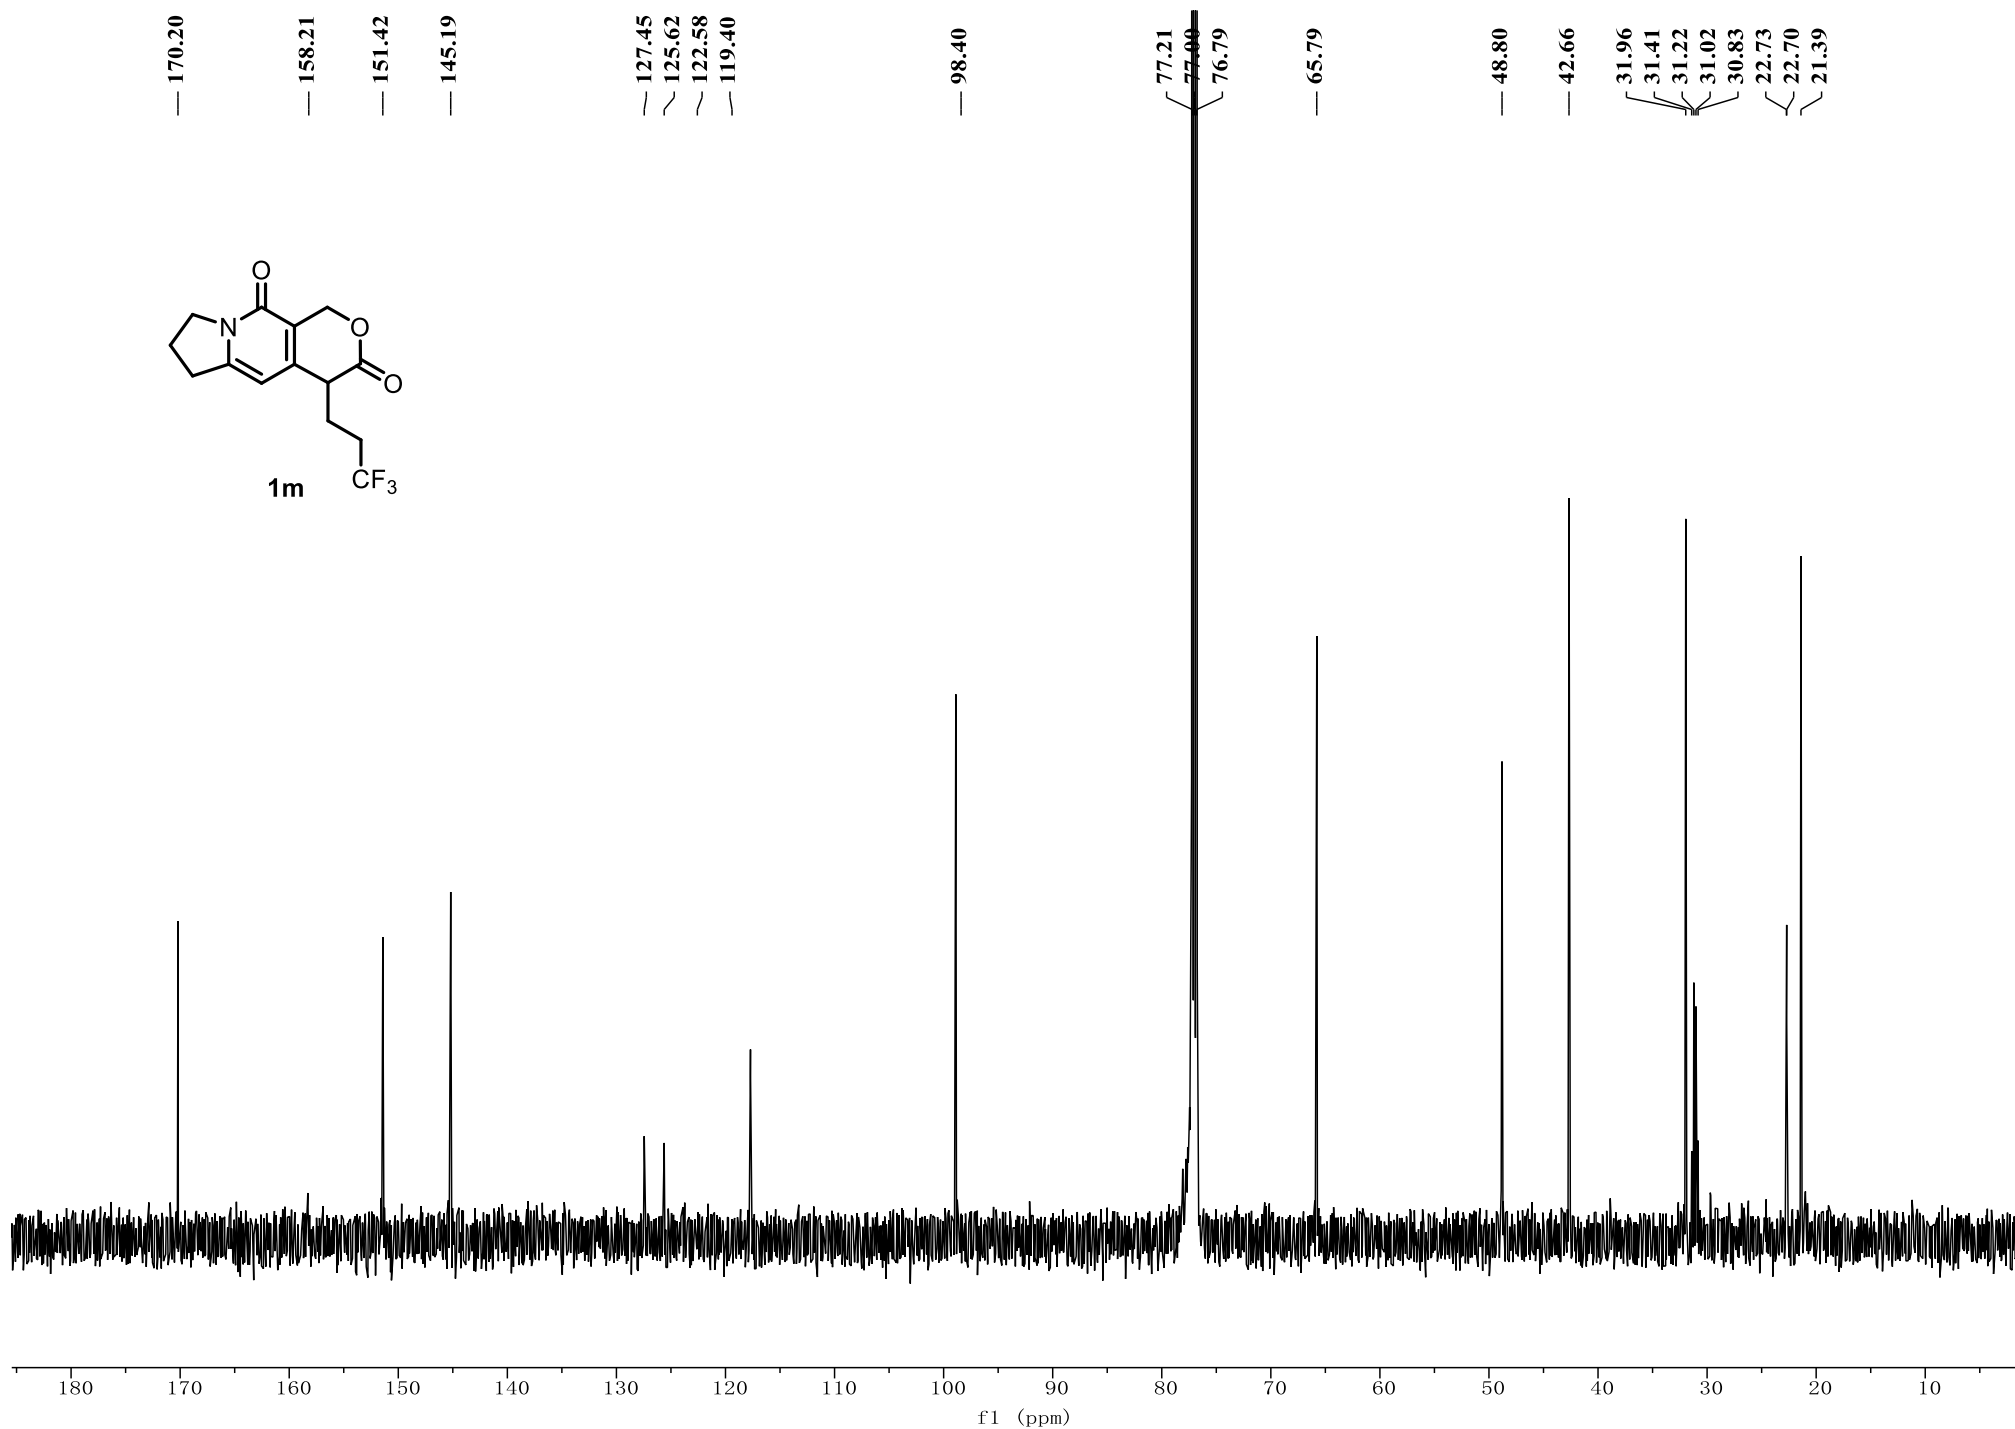

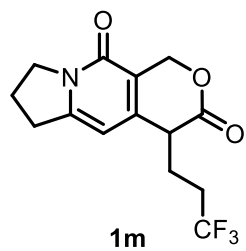

-66.31  
-66.33  
-66.35

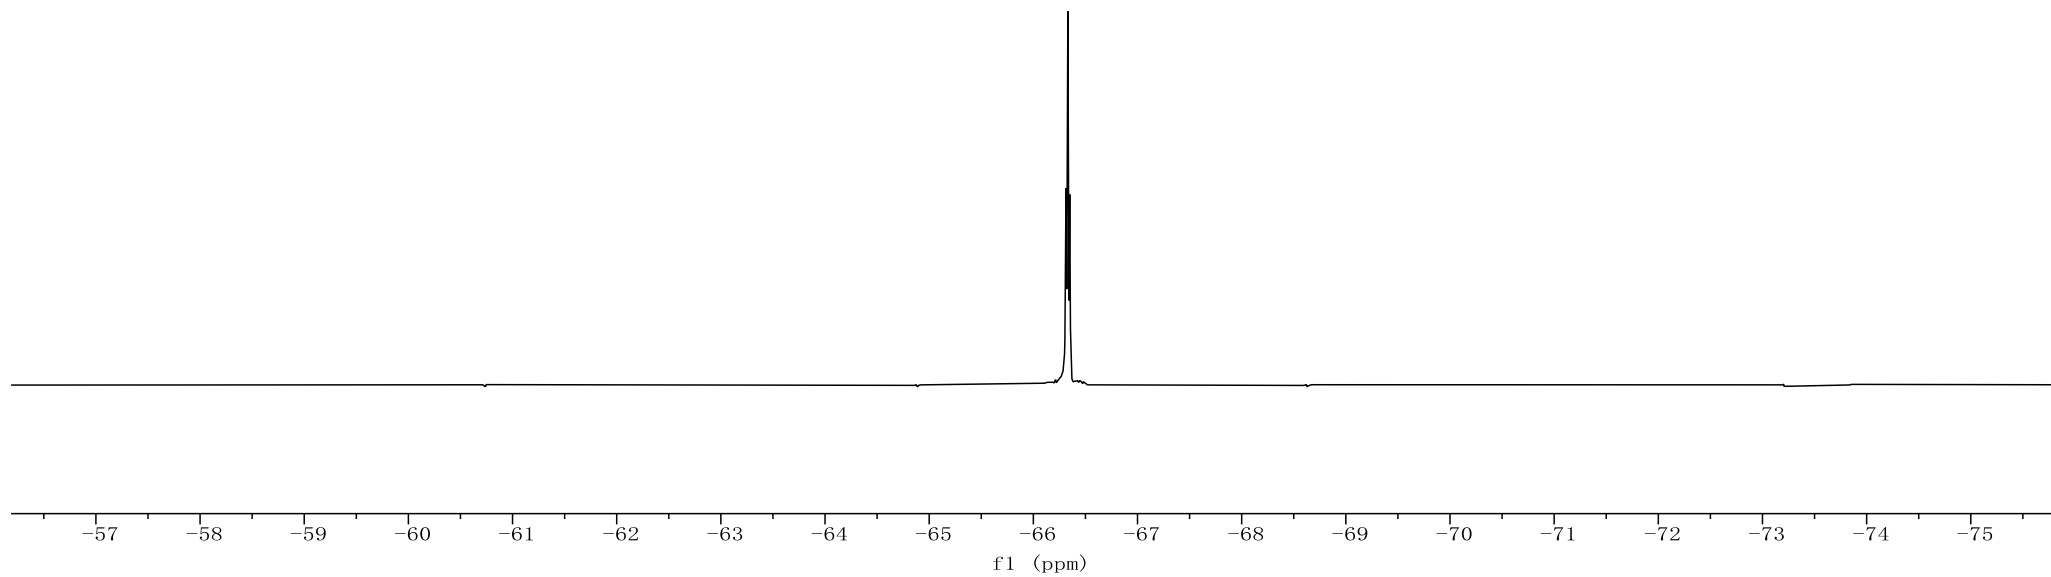

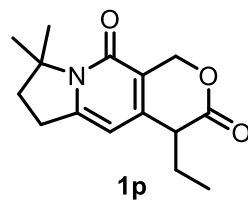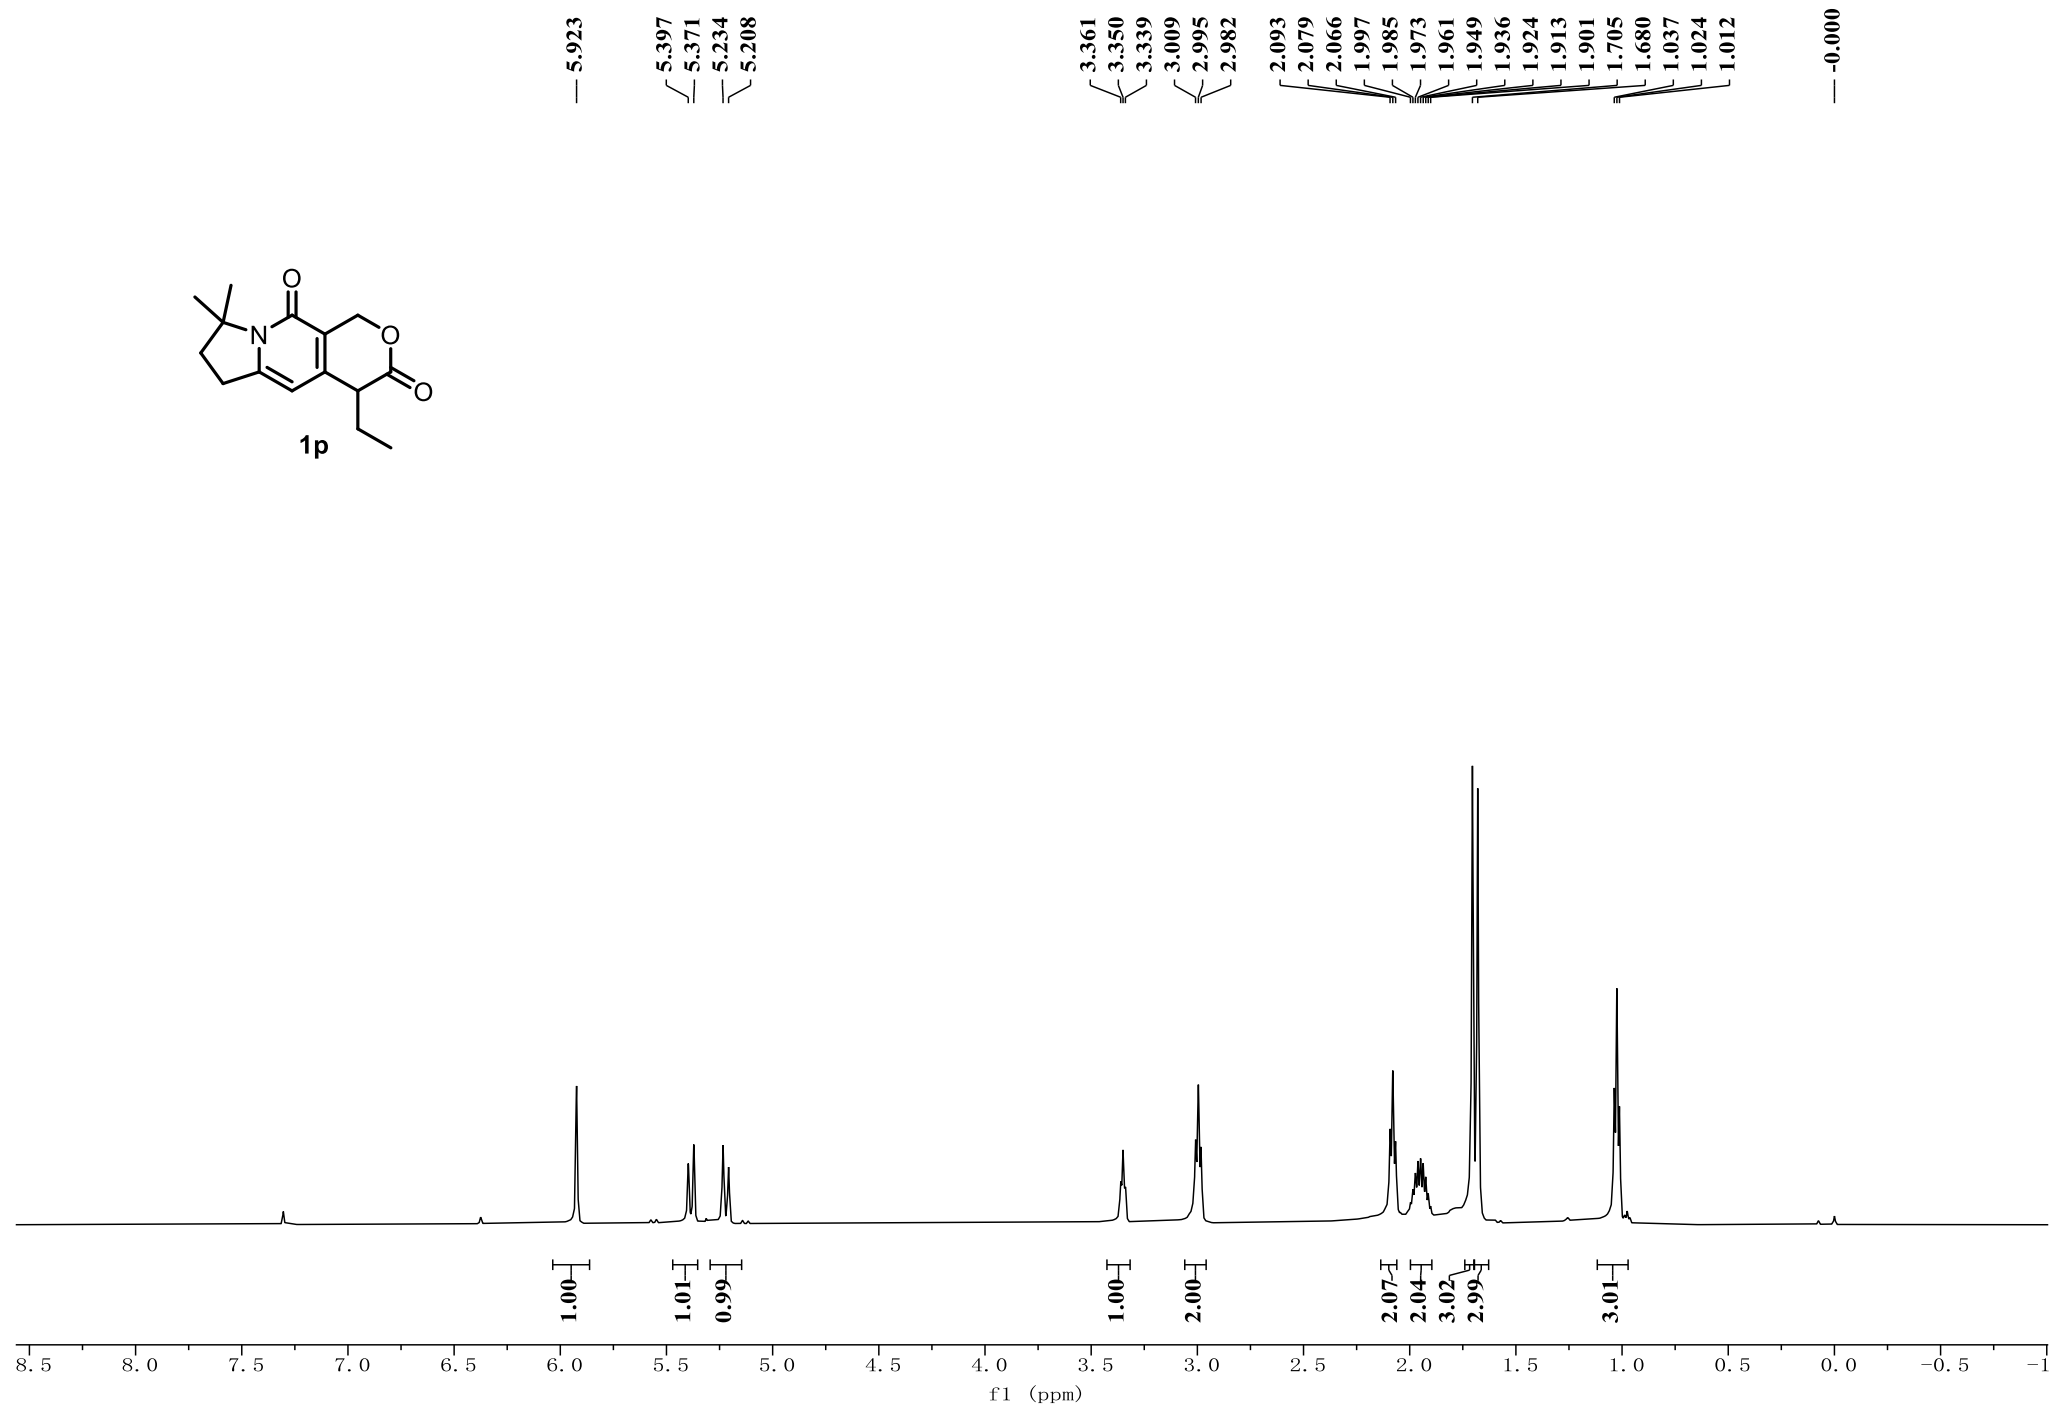

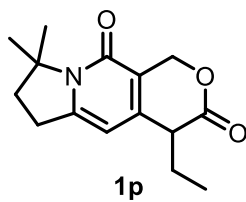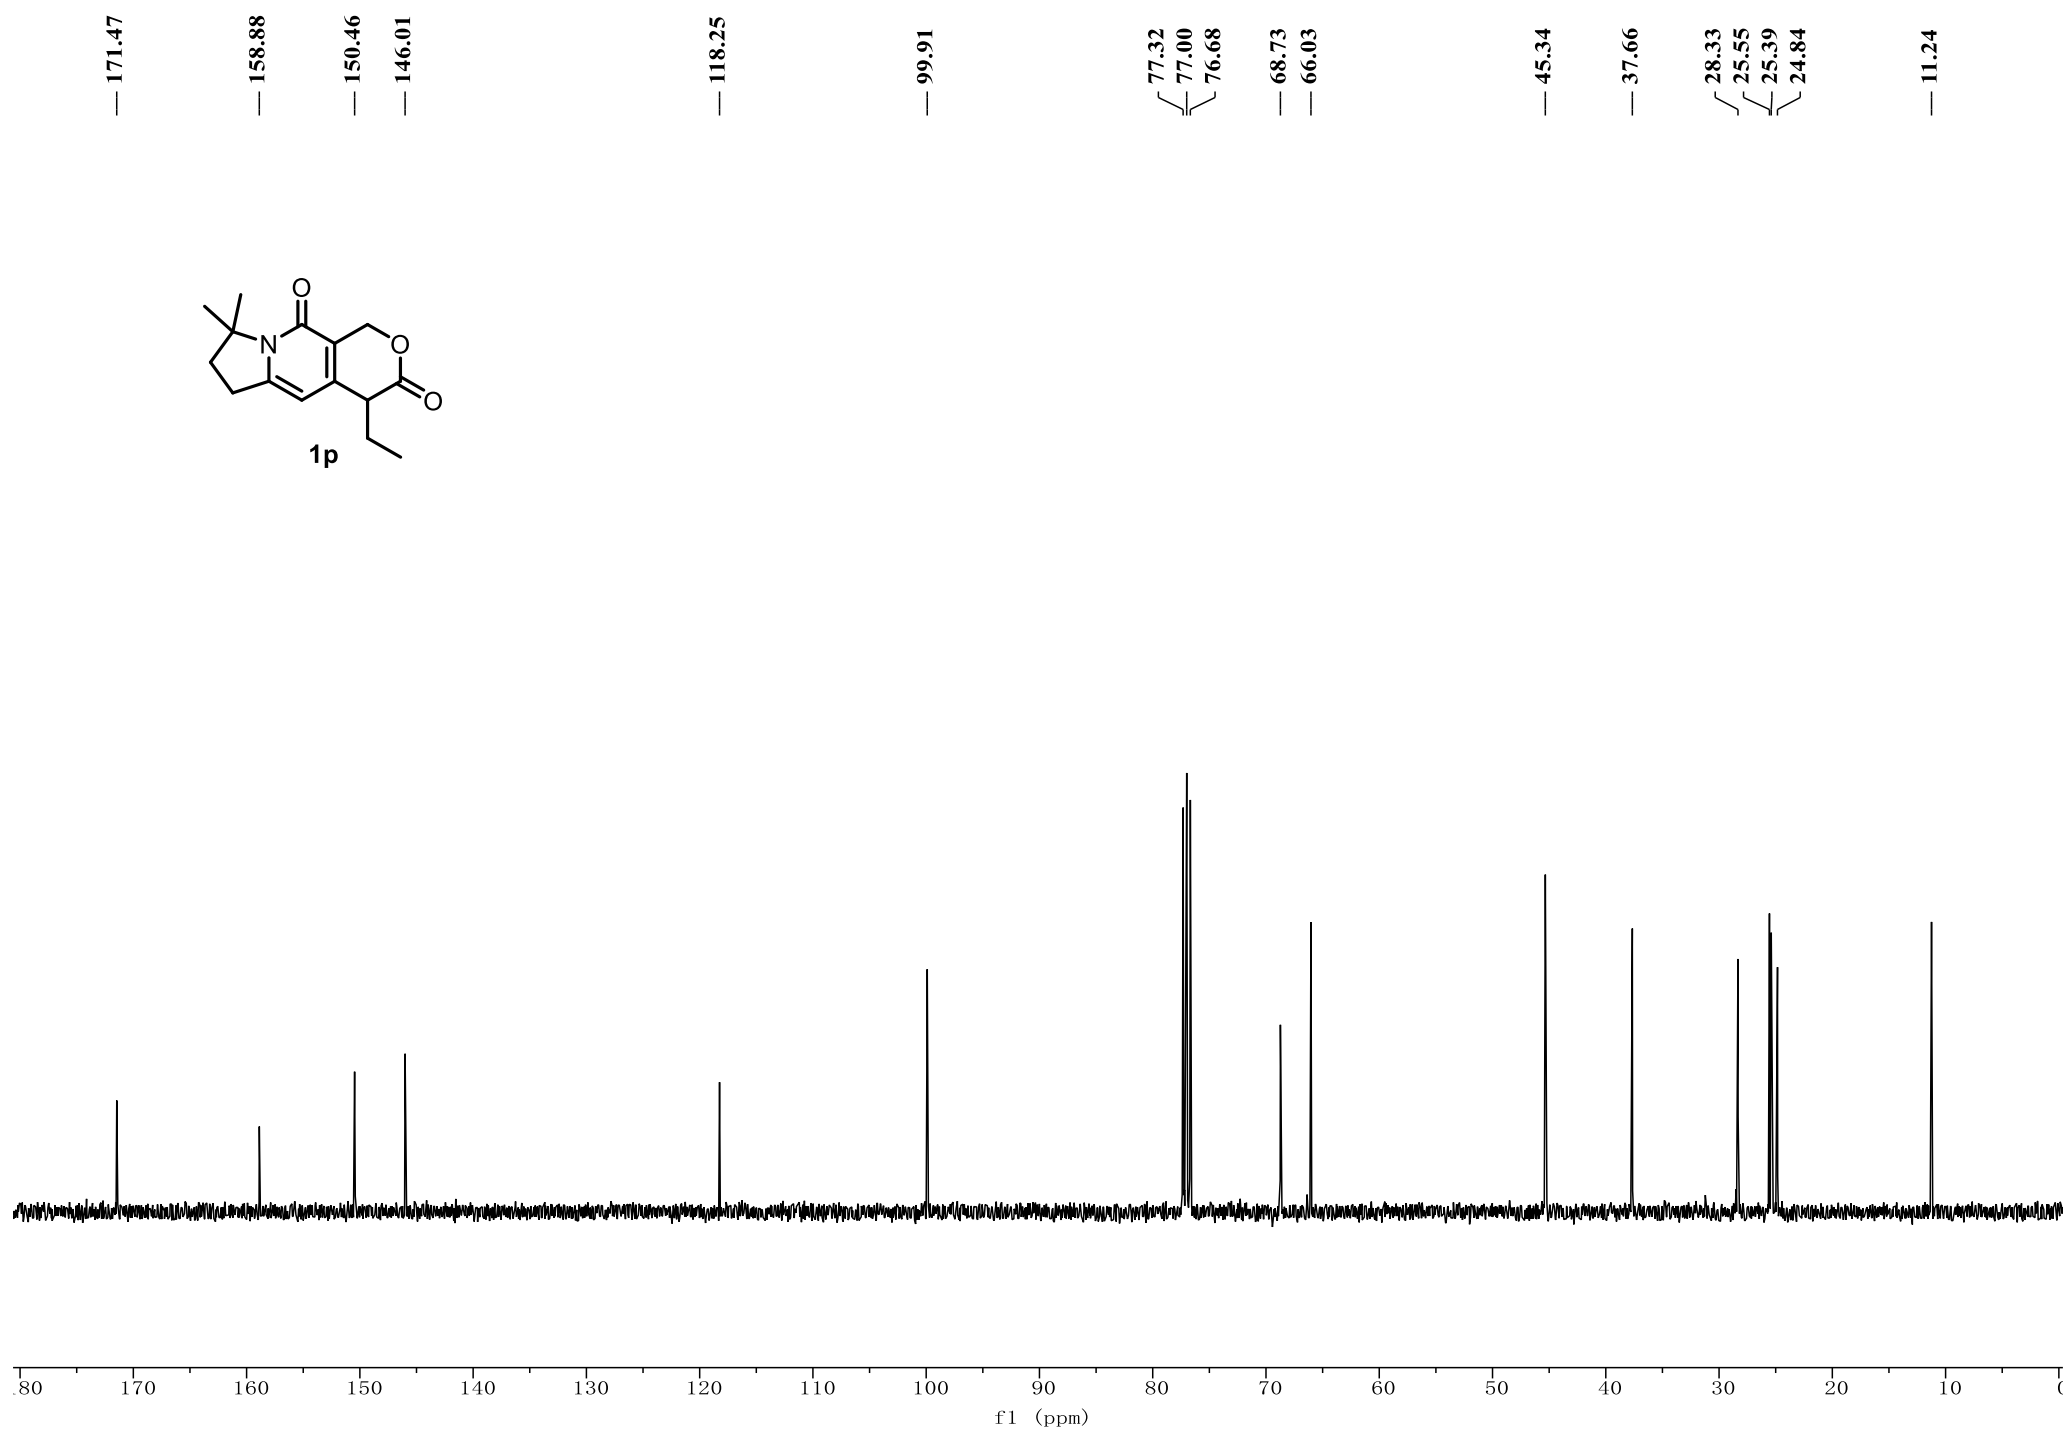

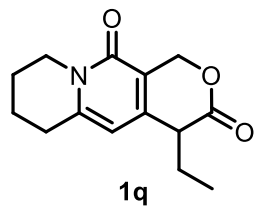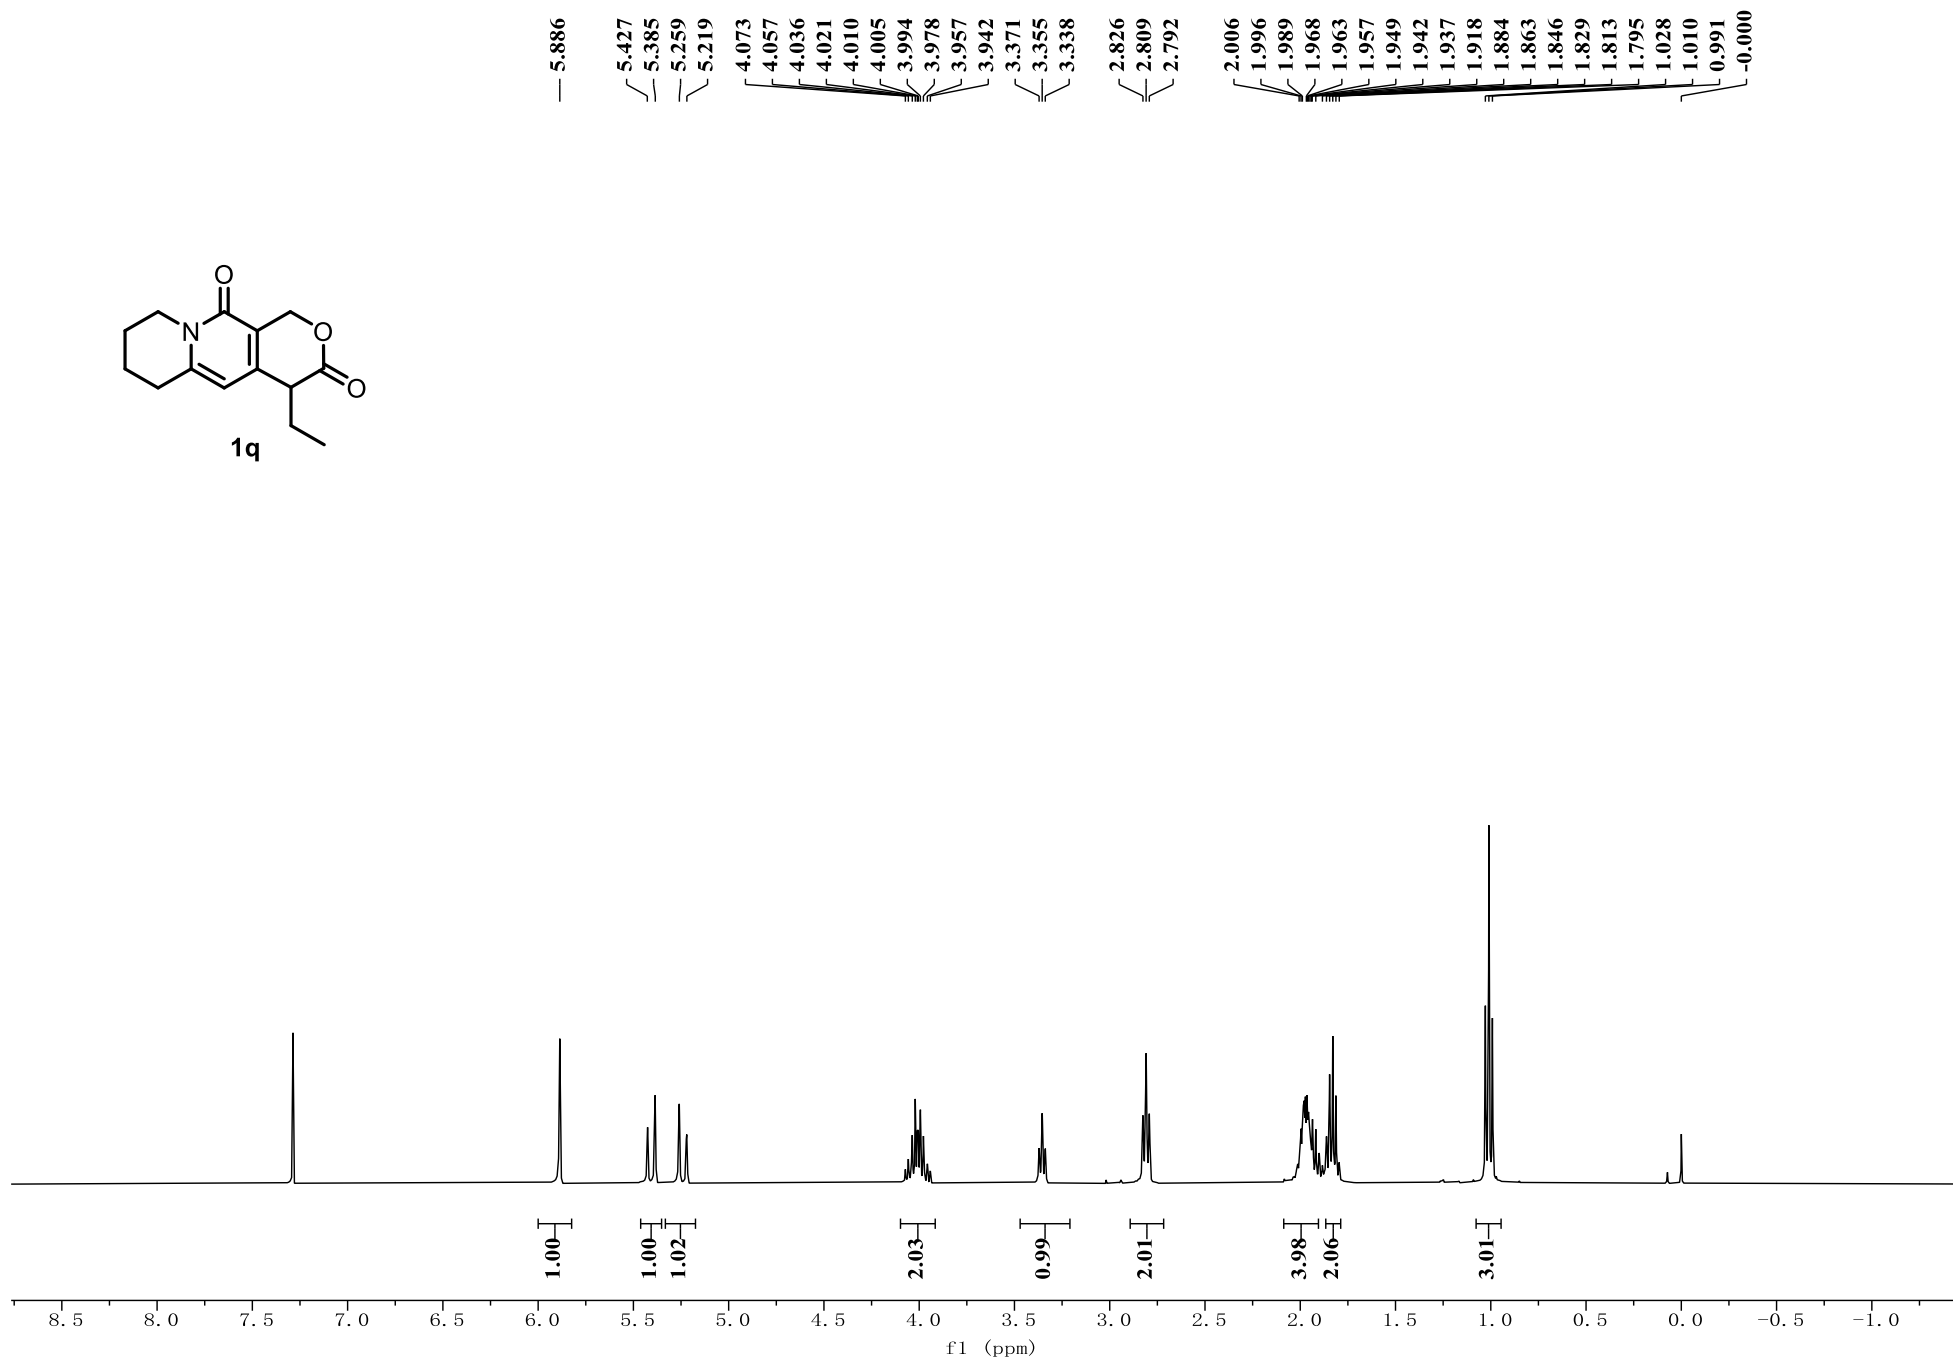

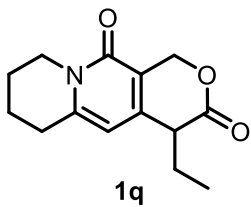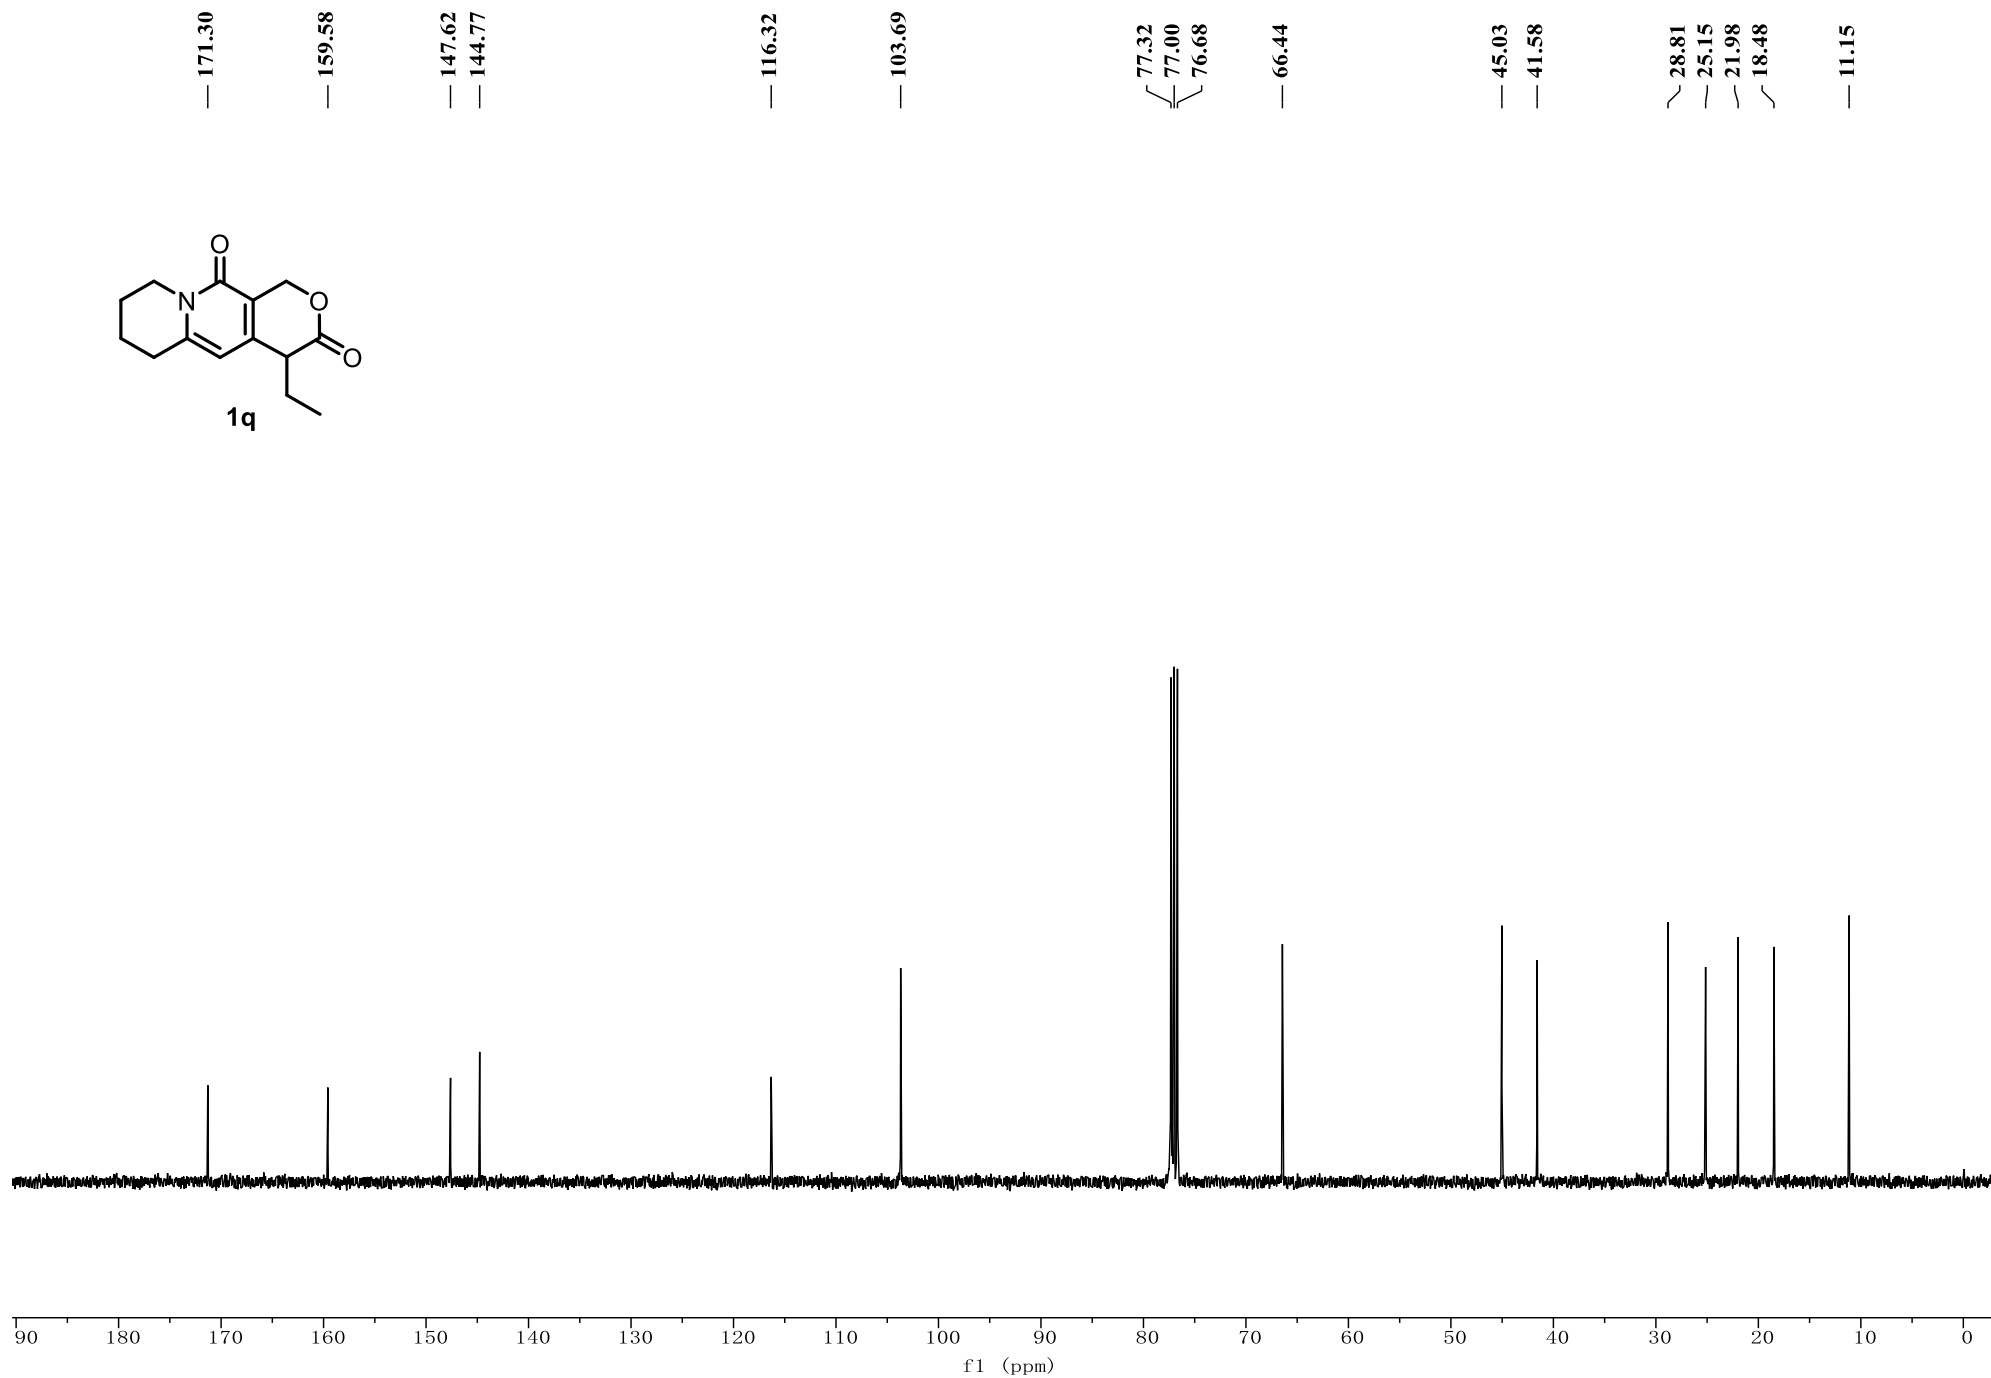

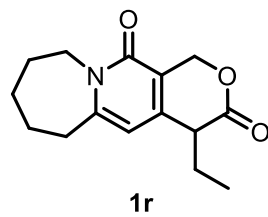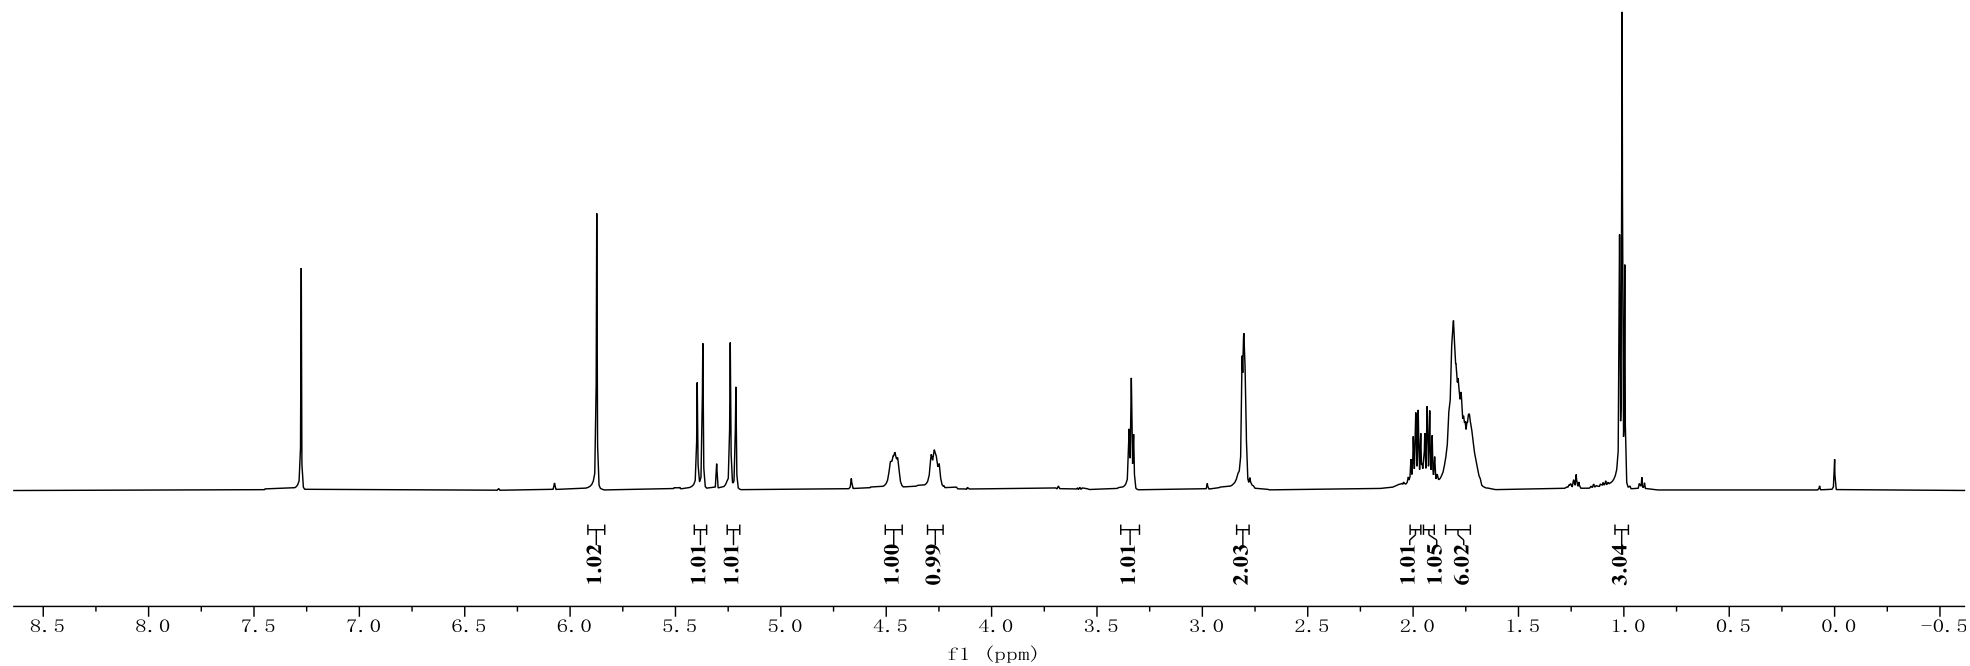

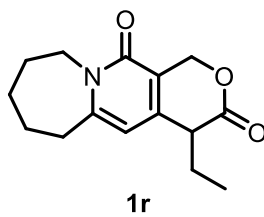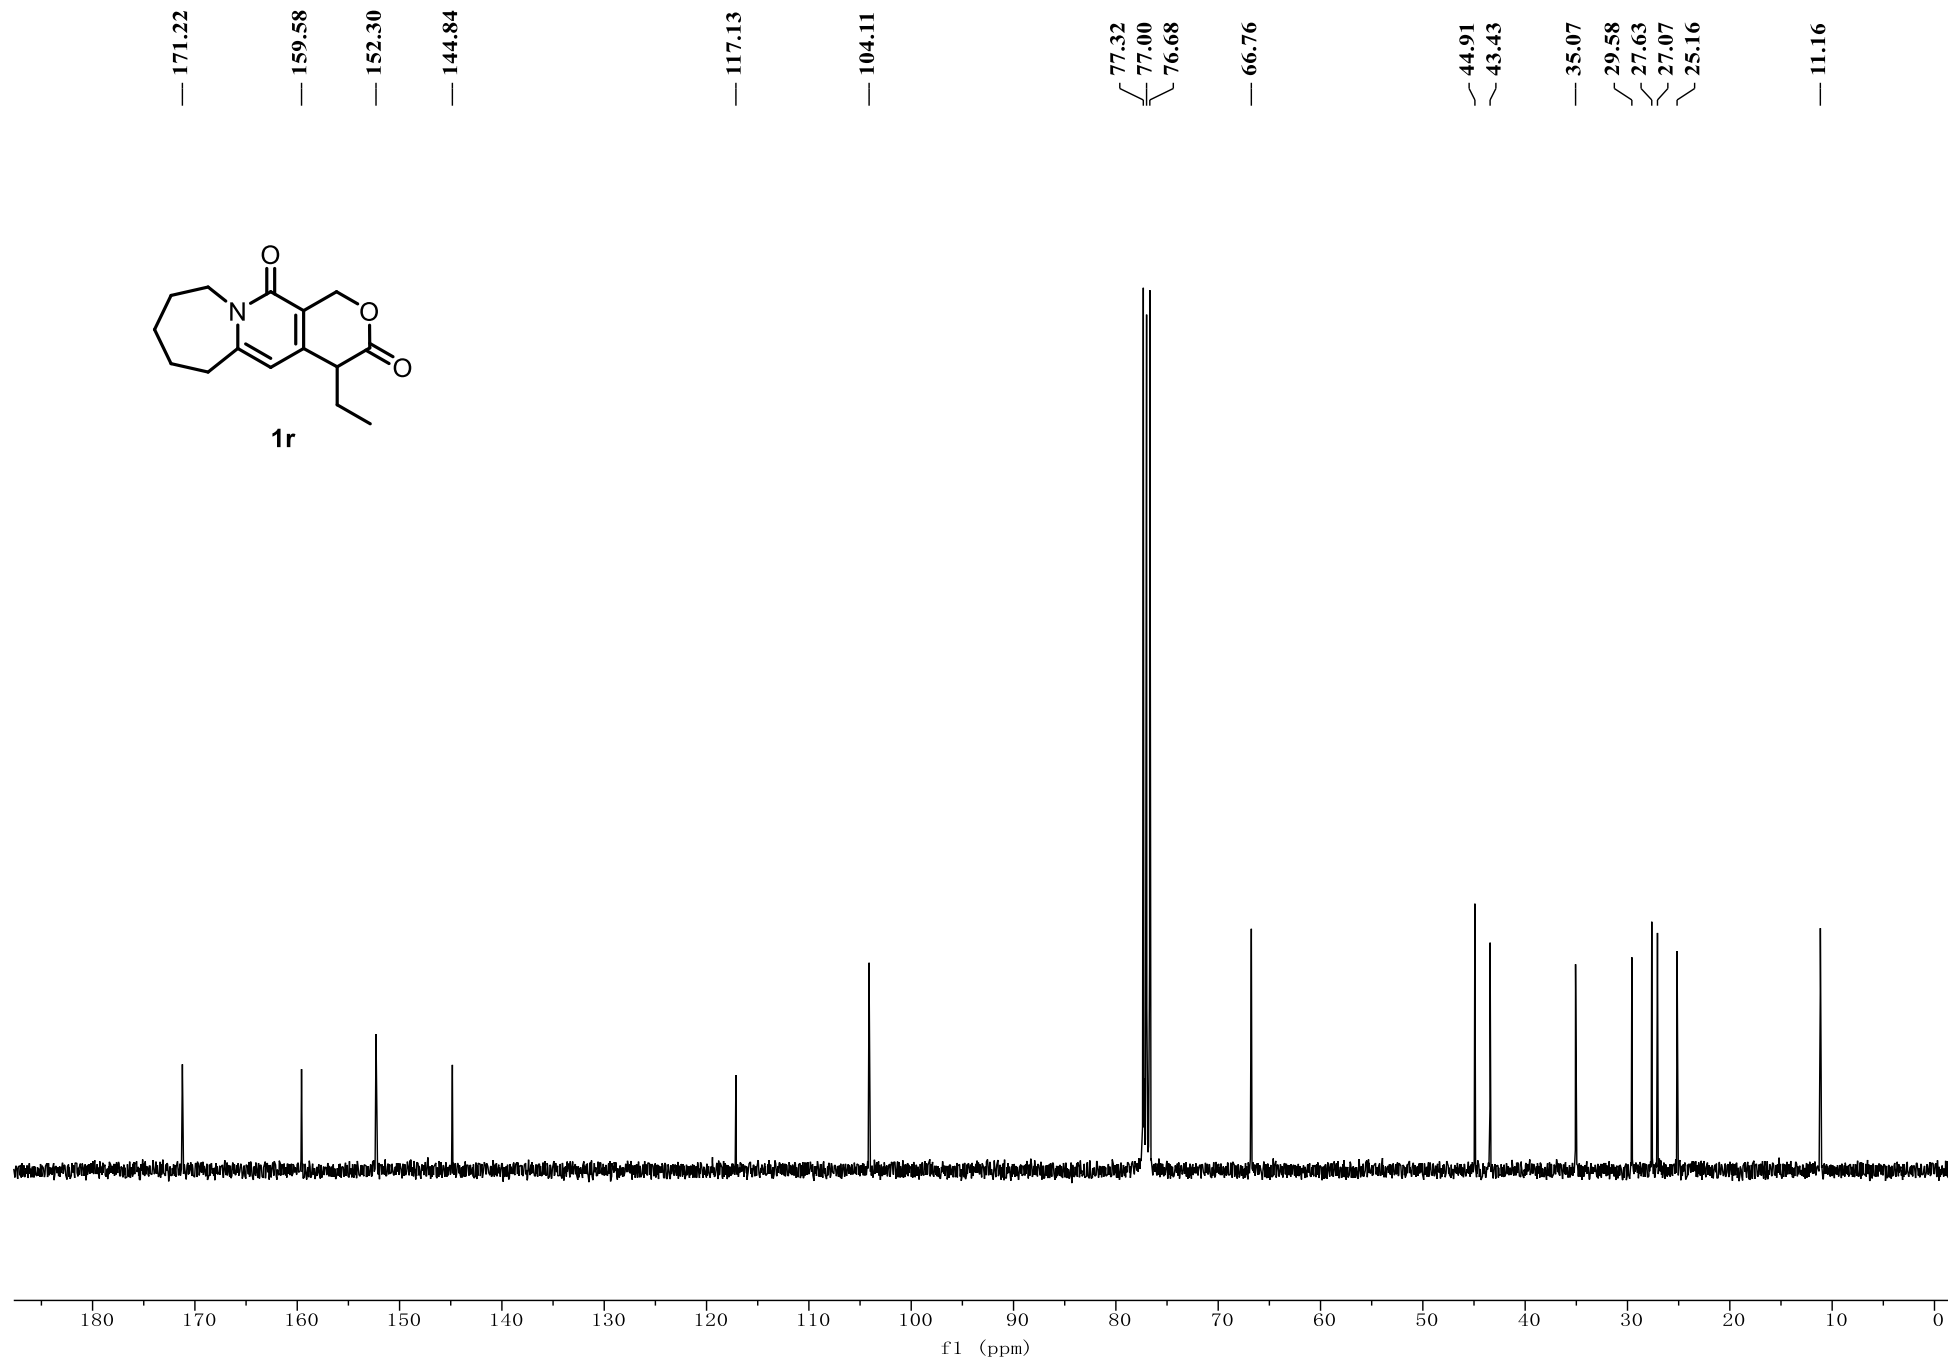

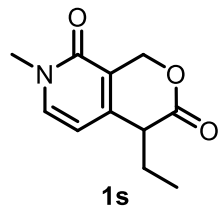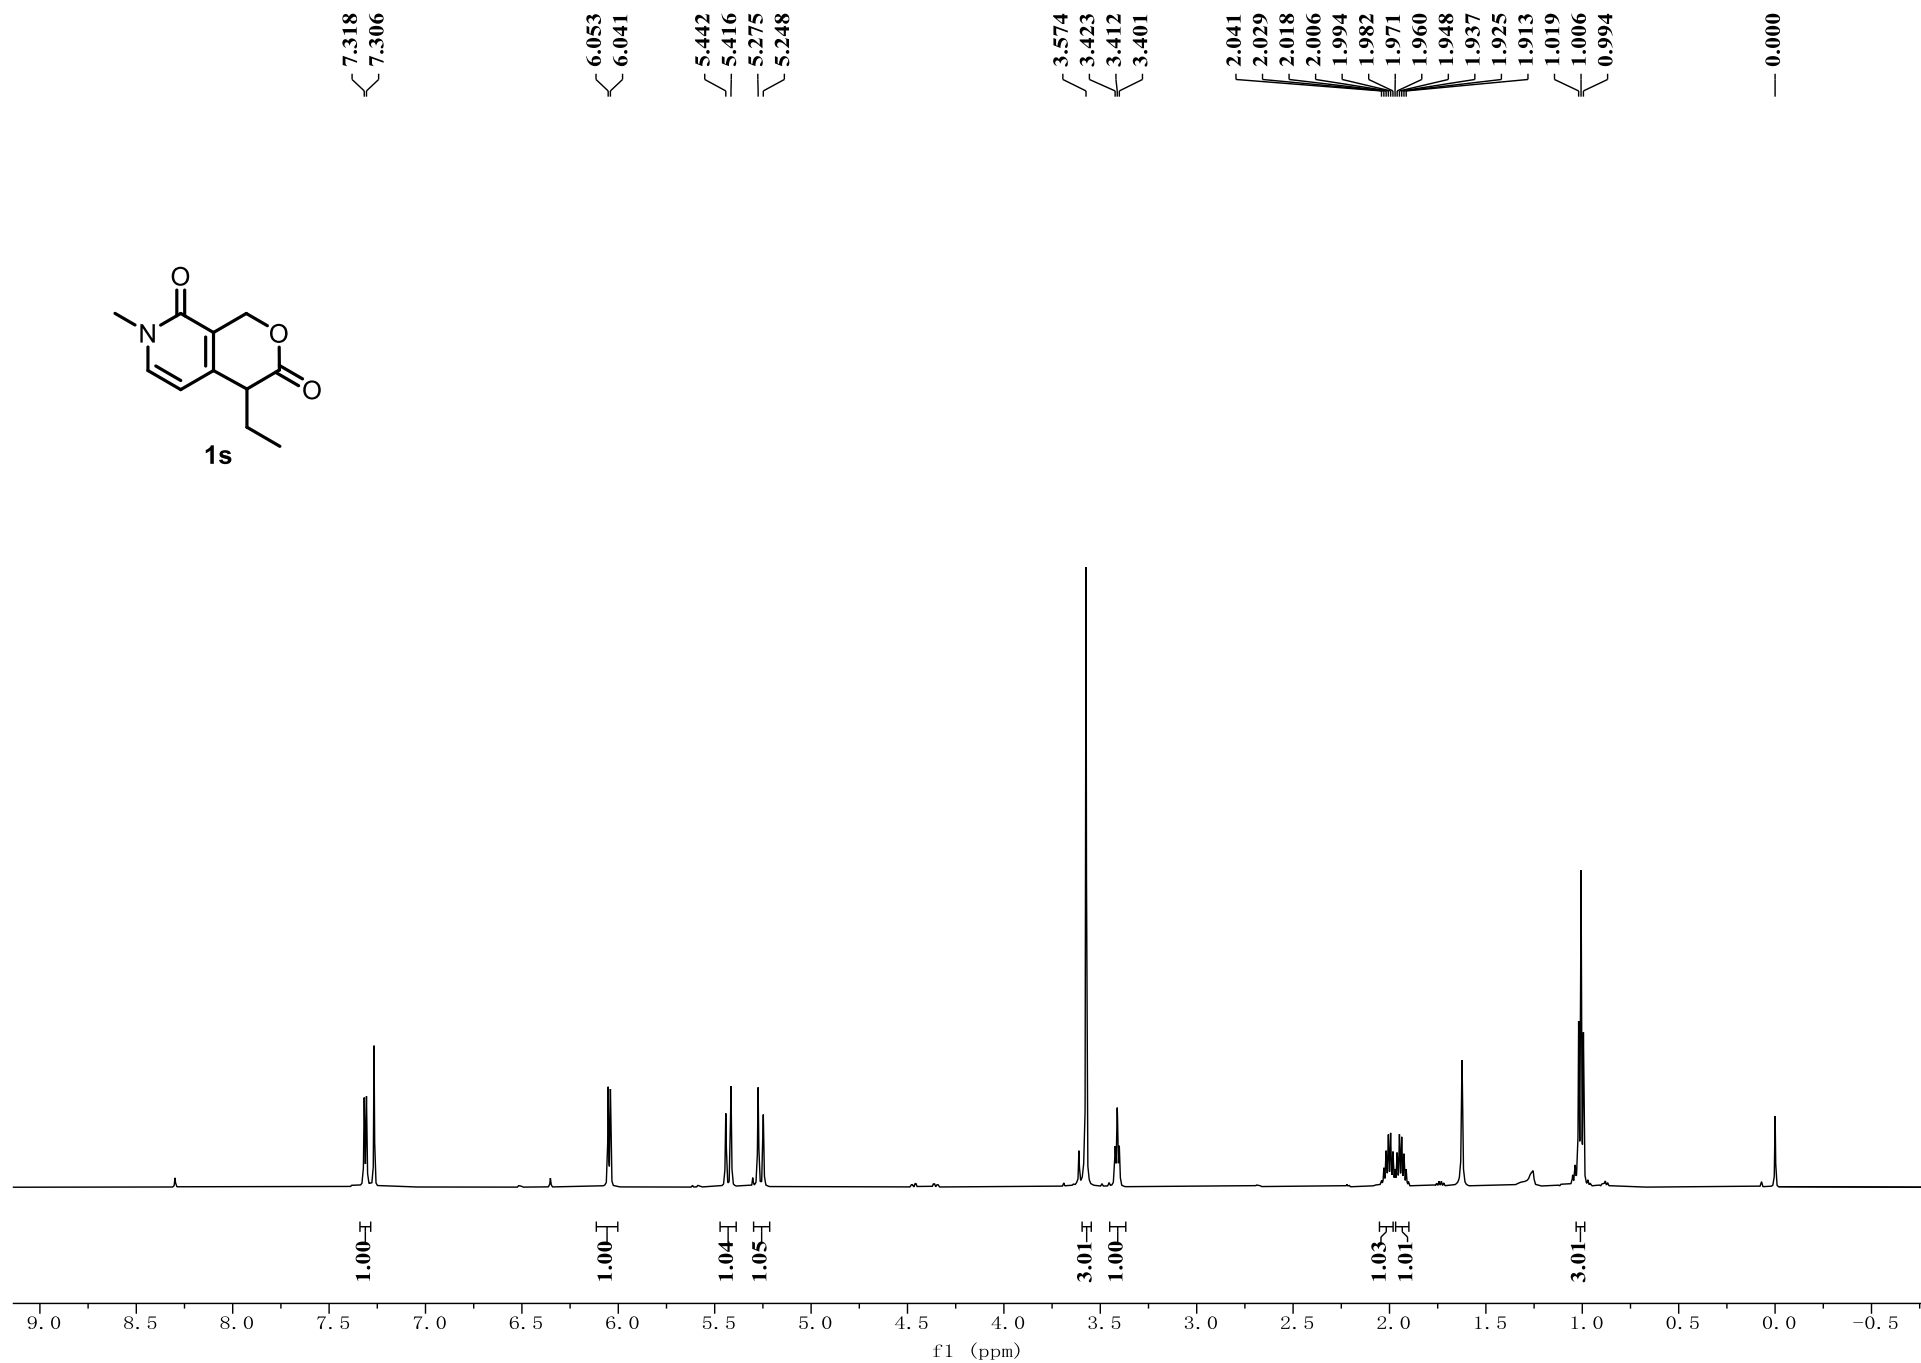

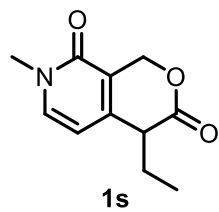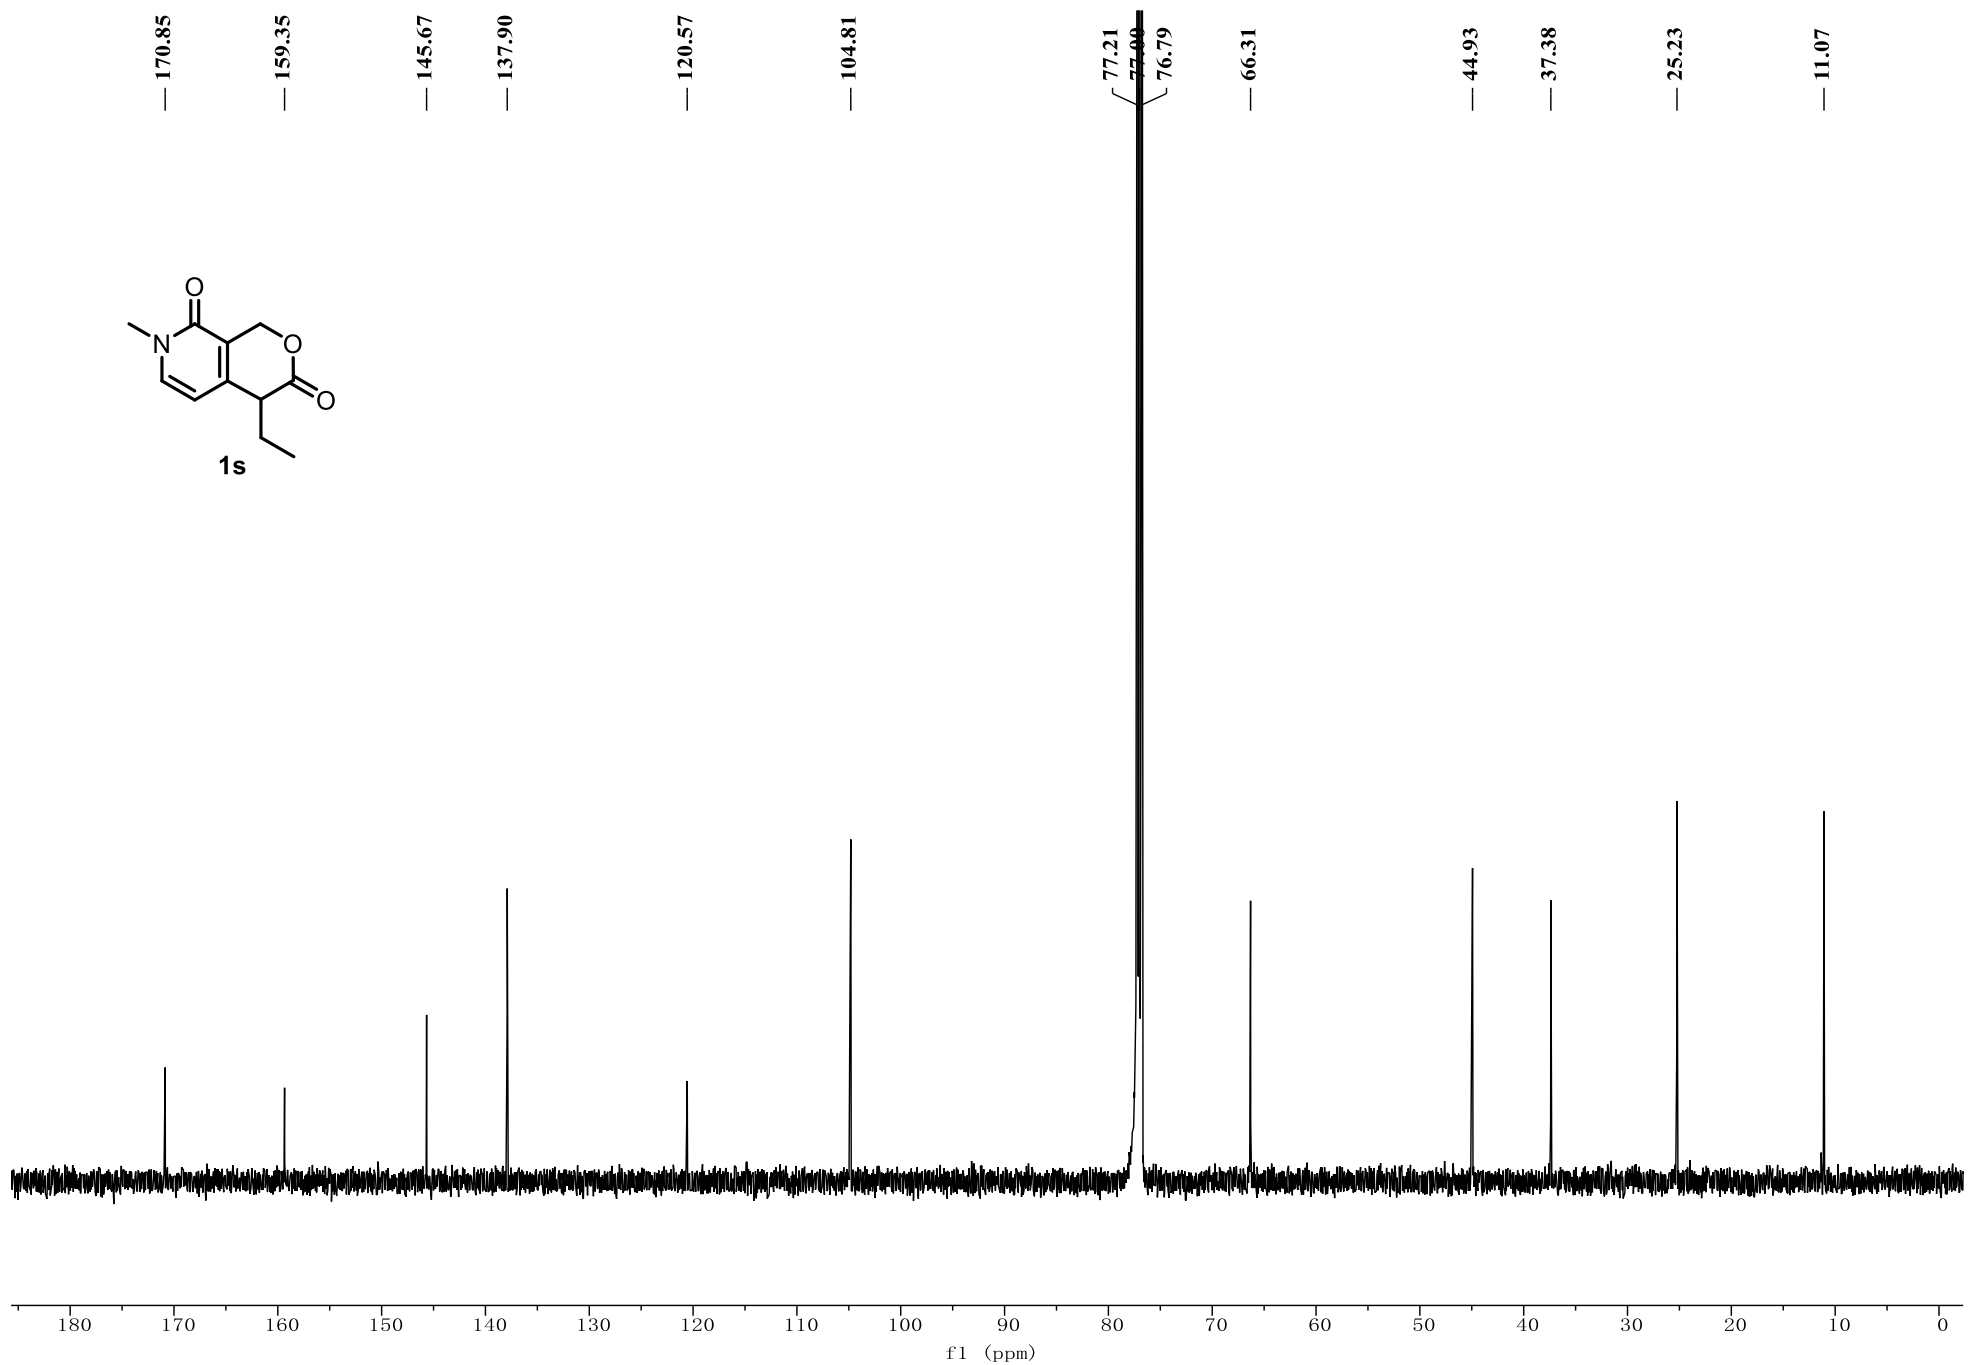

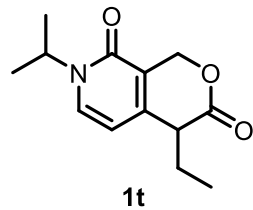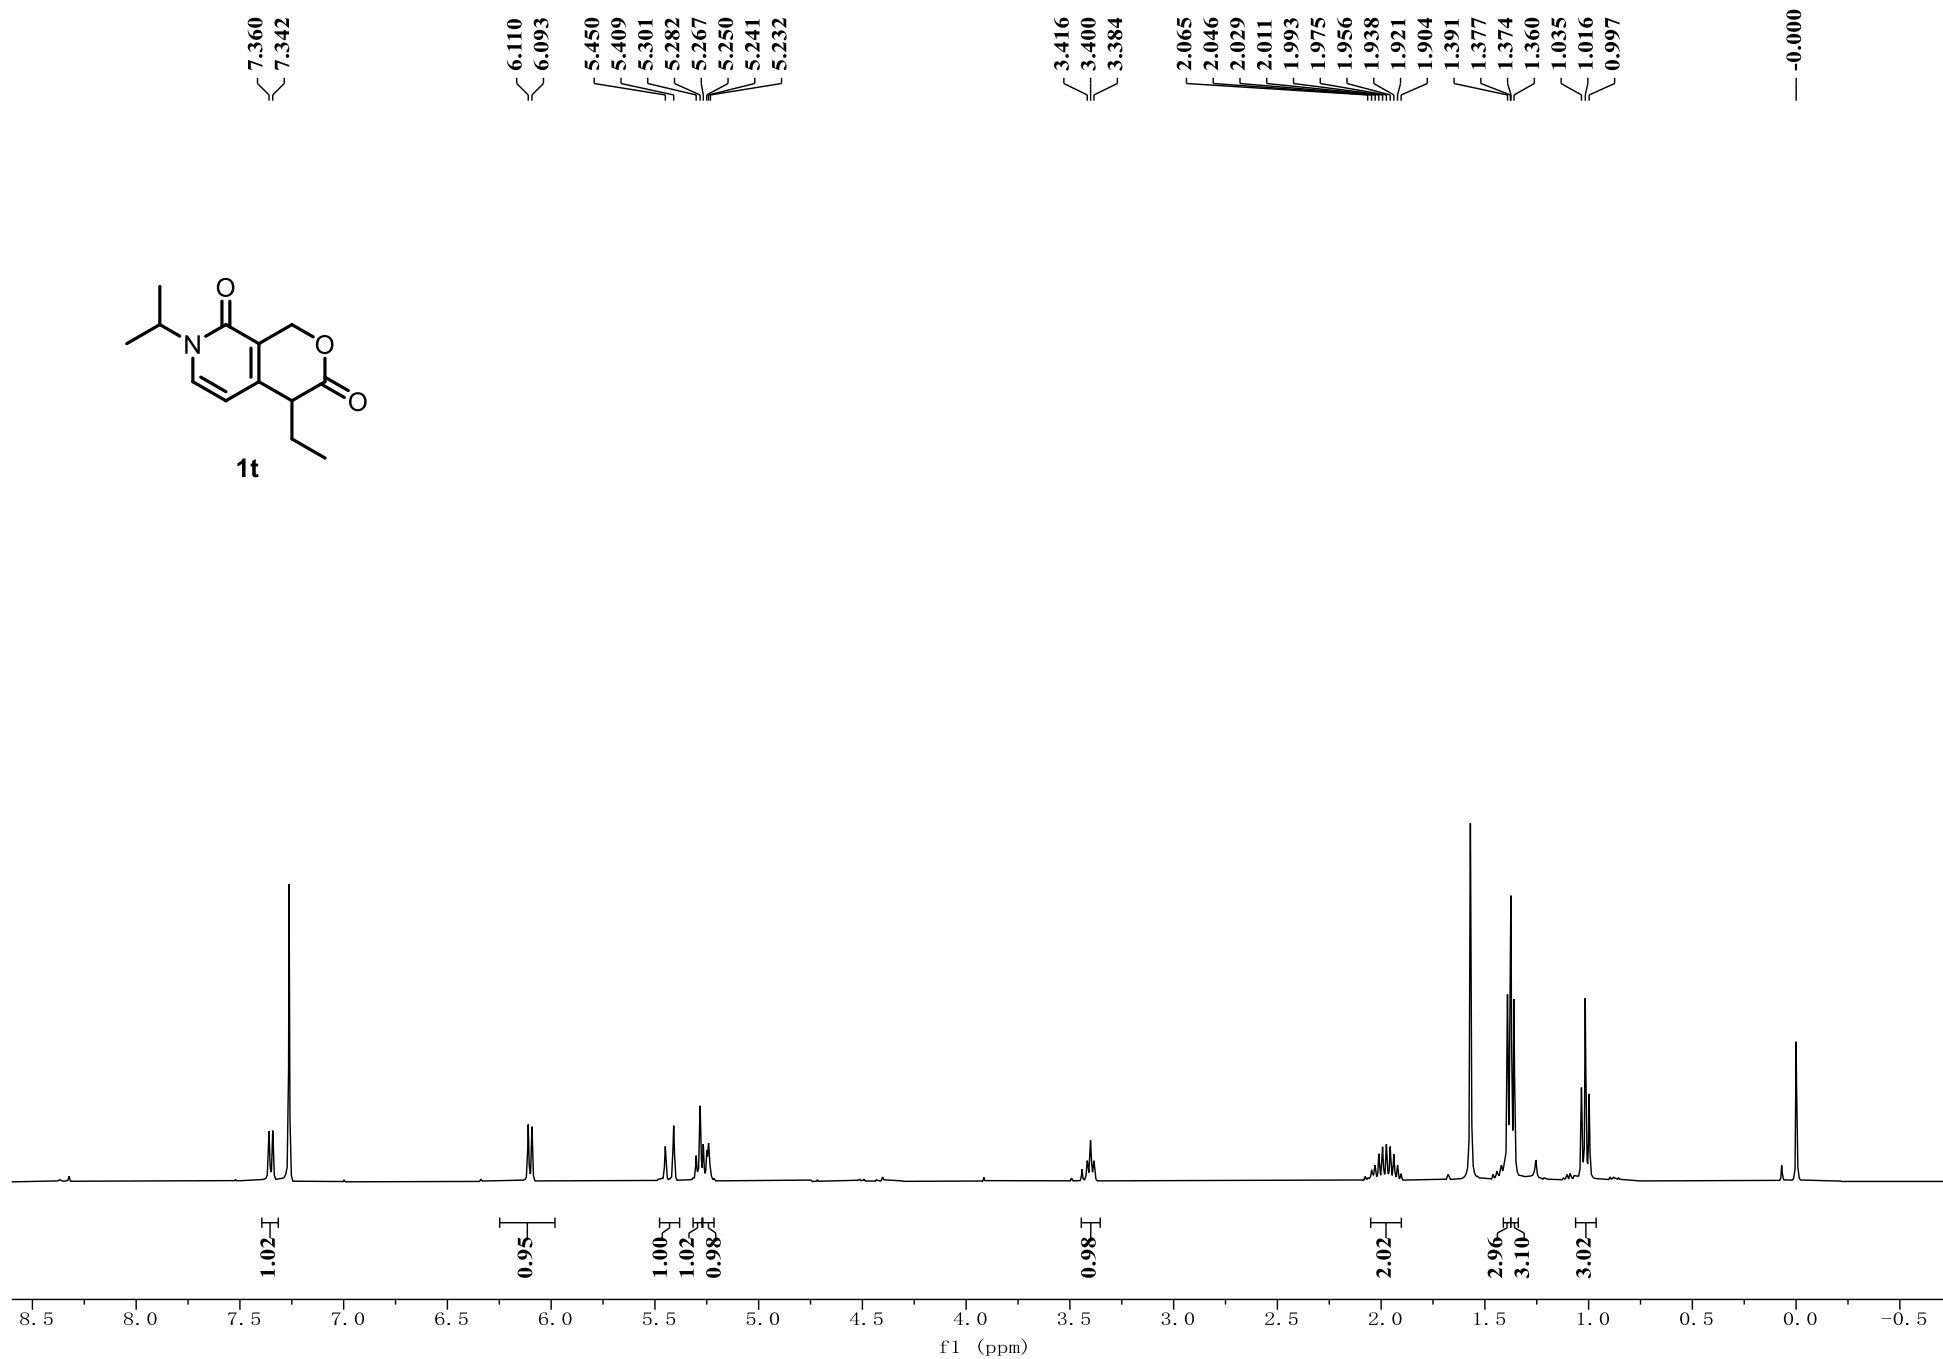

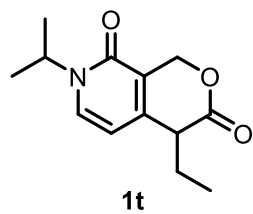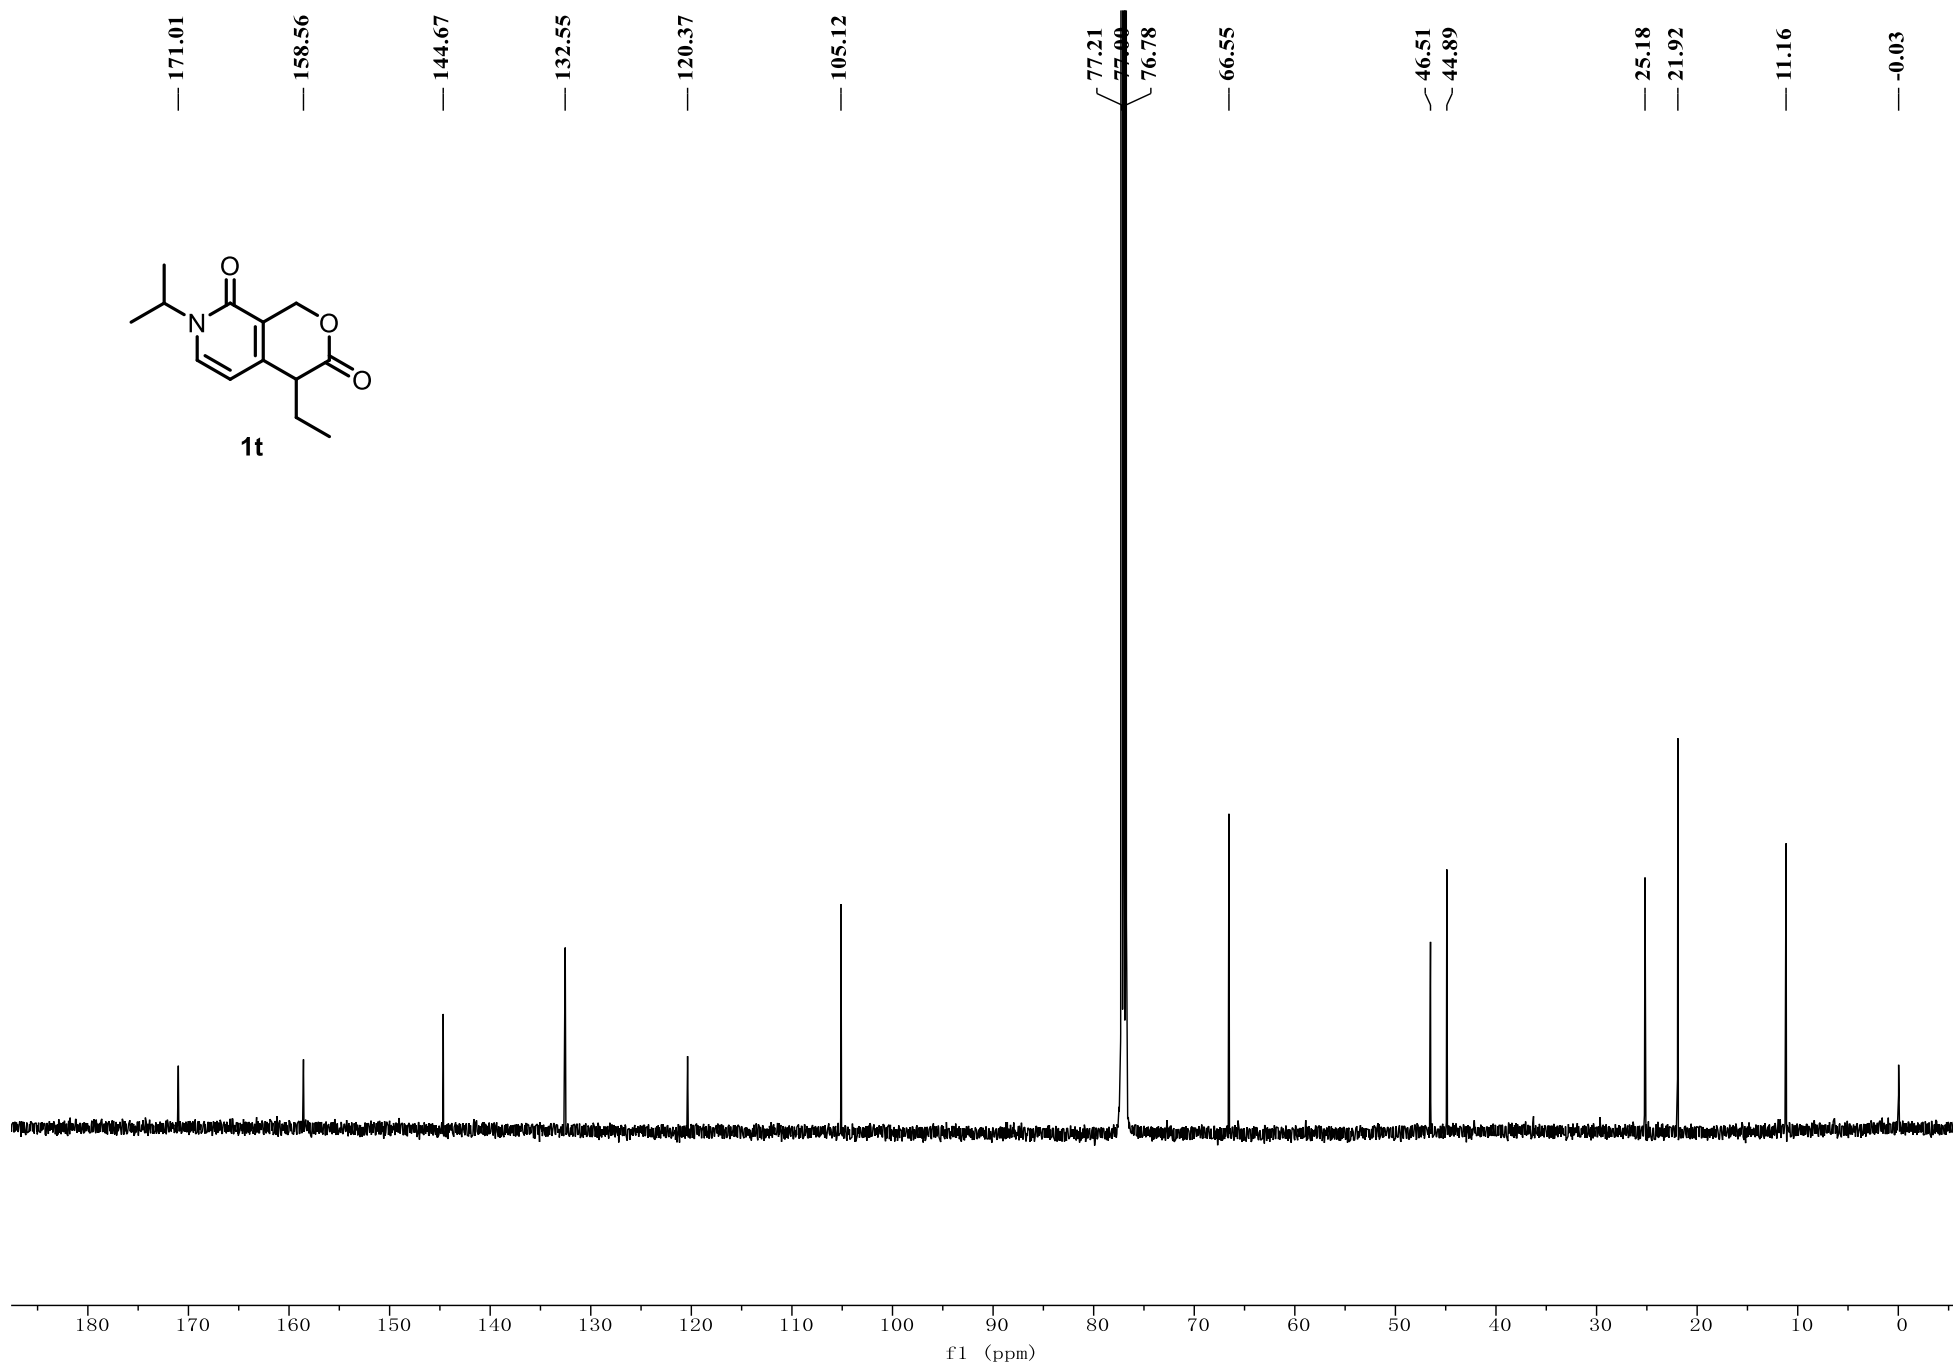

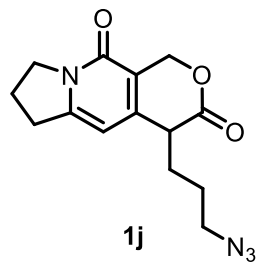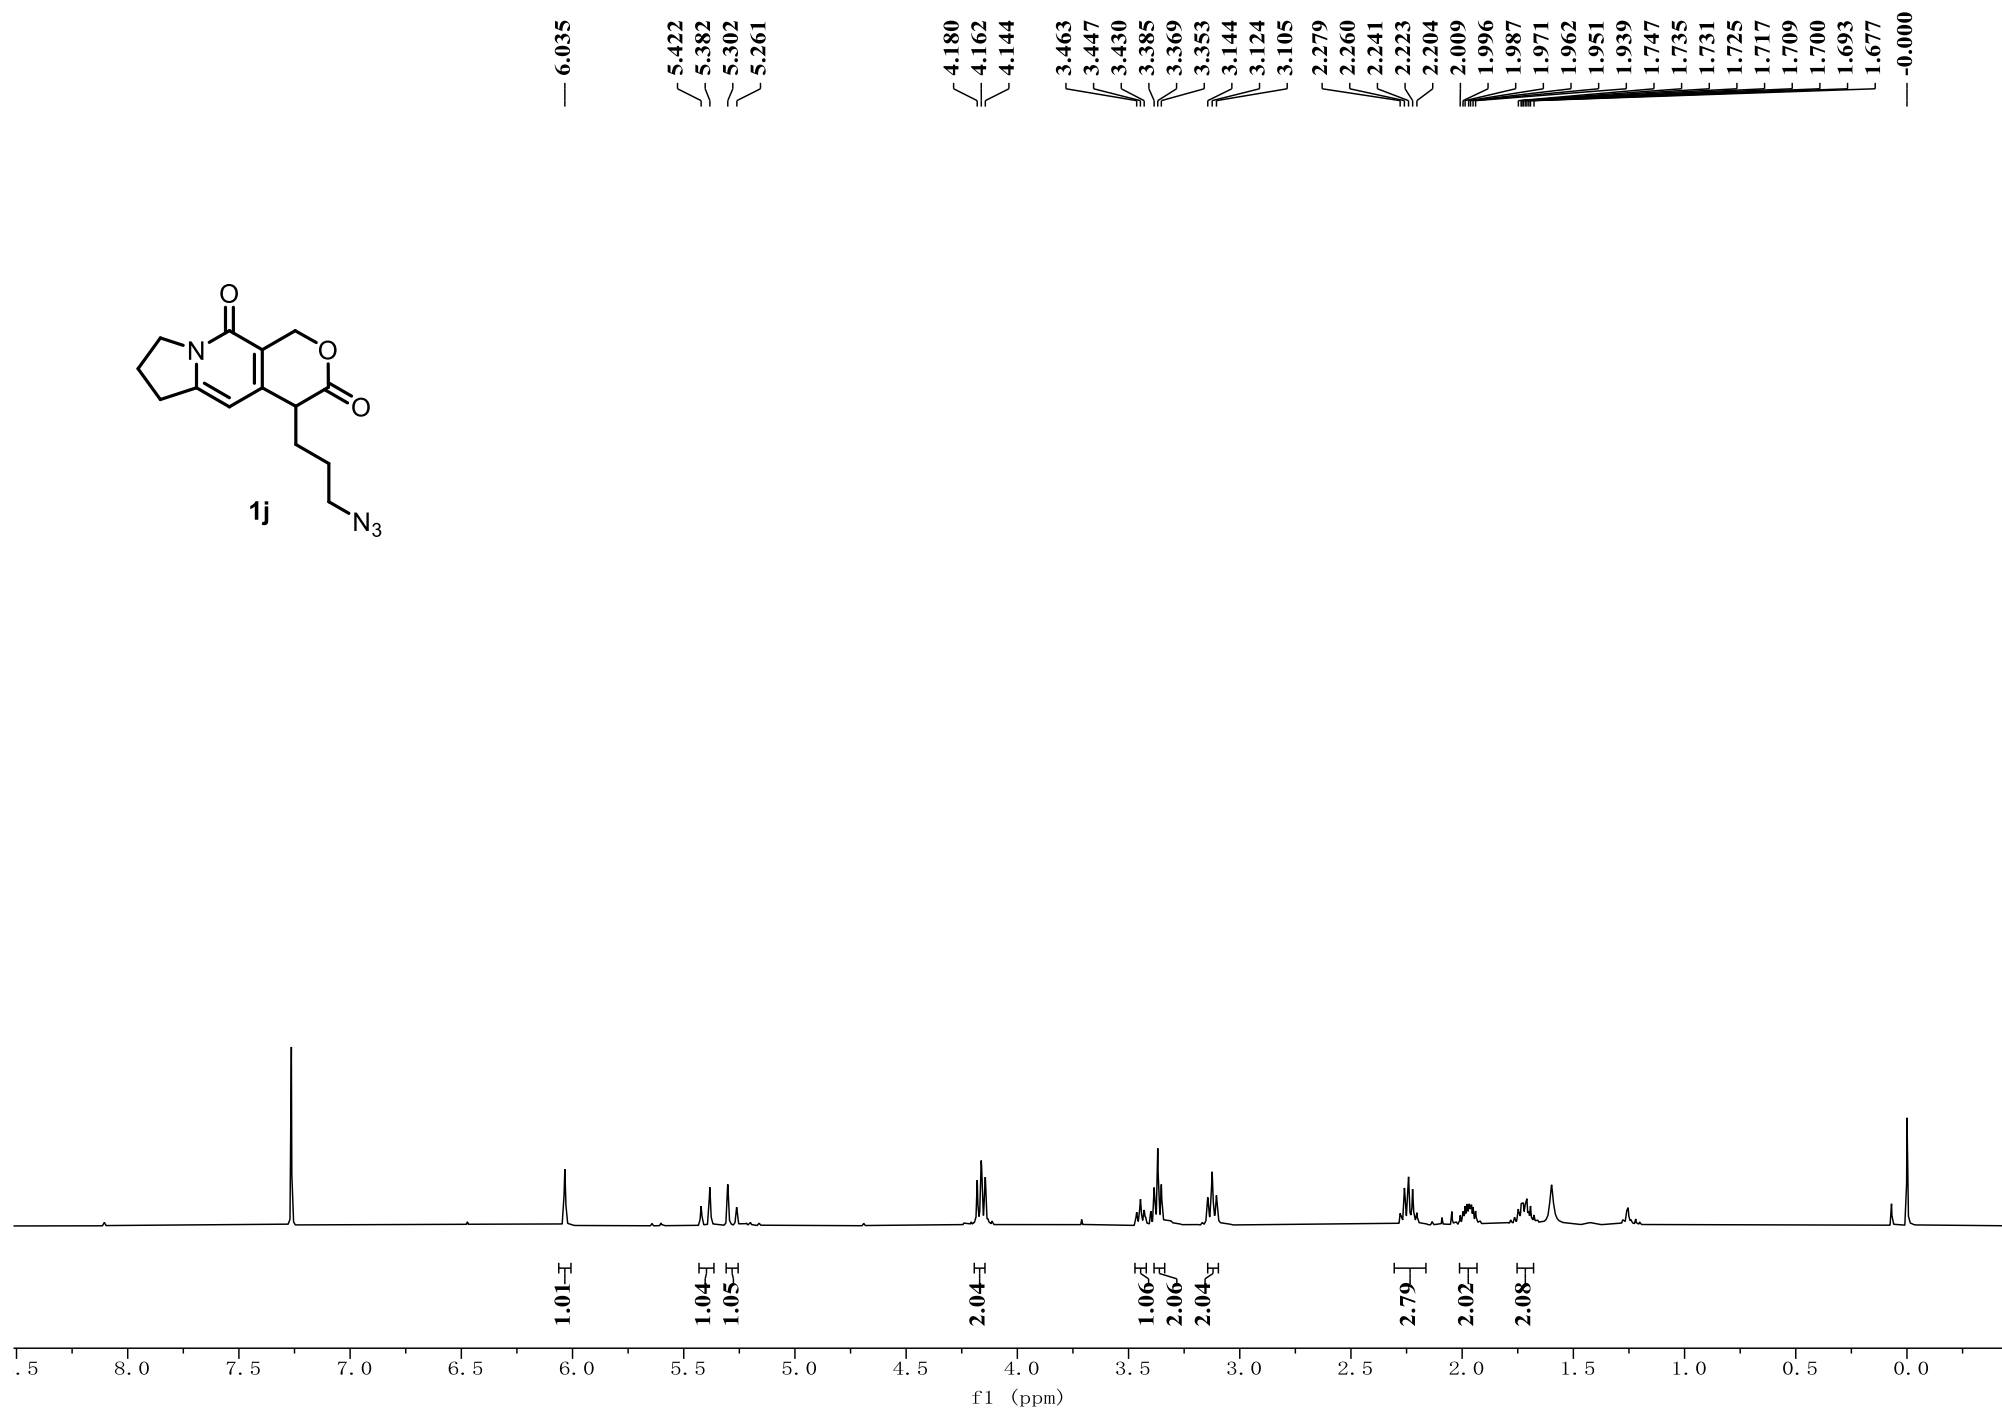

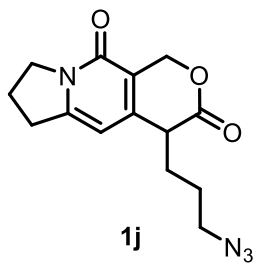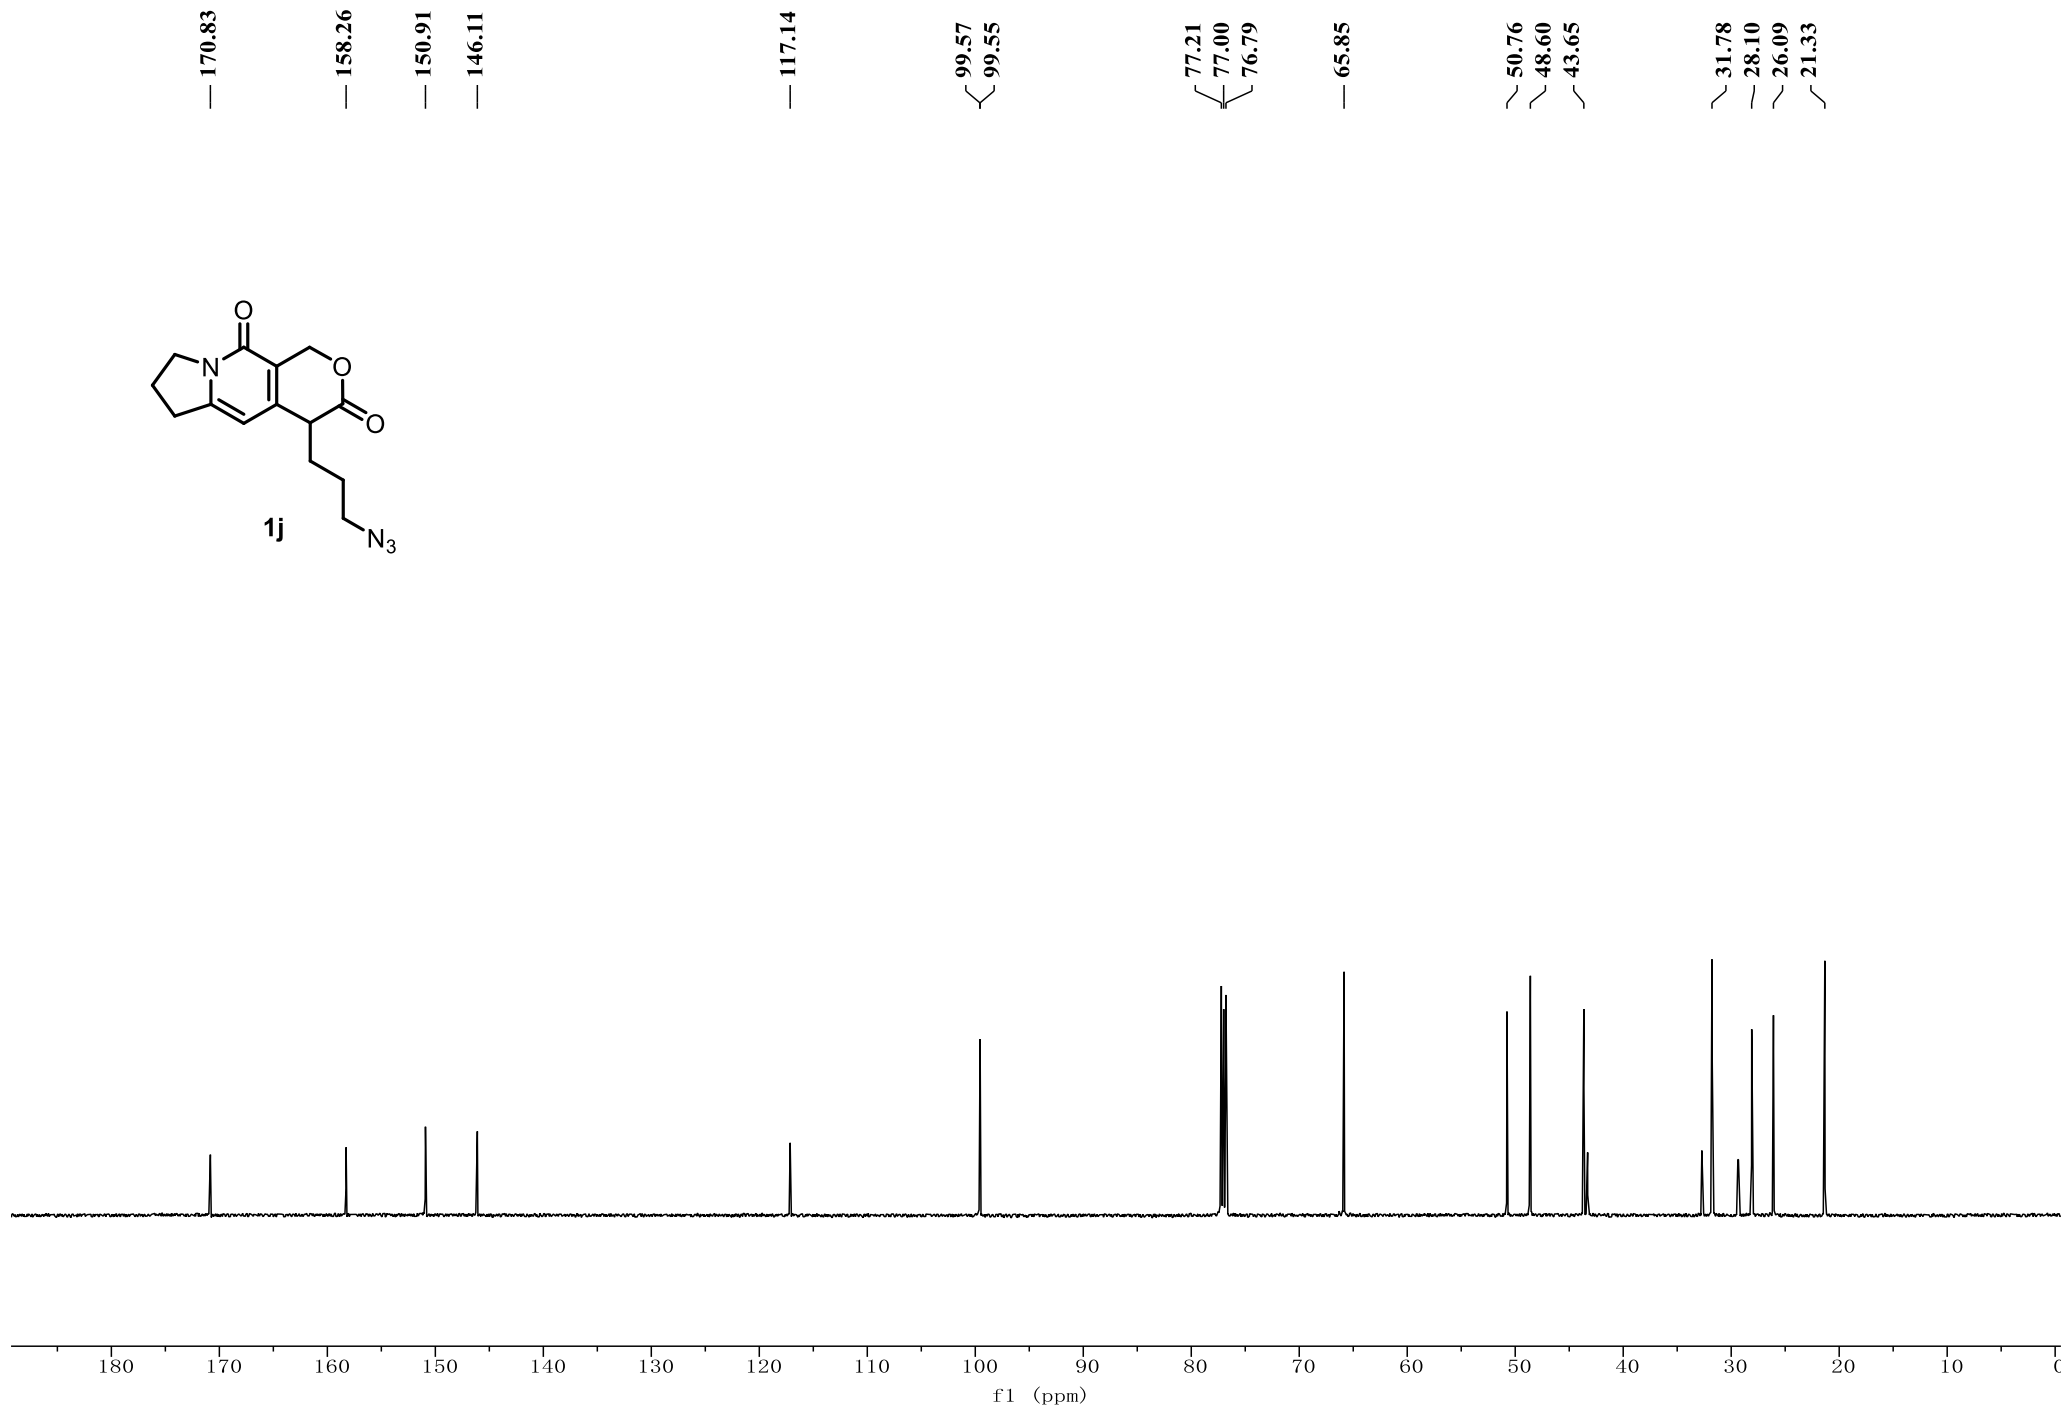

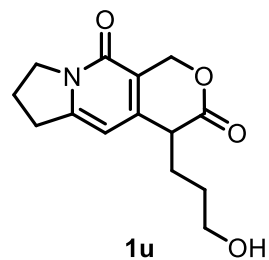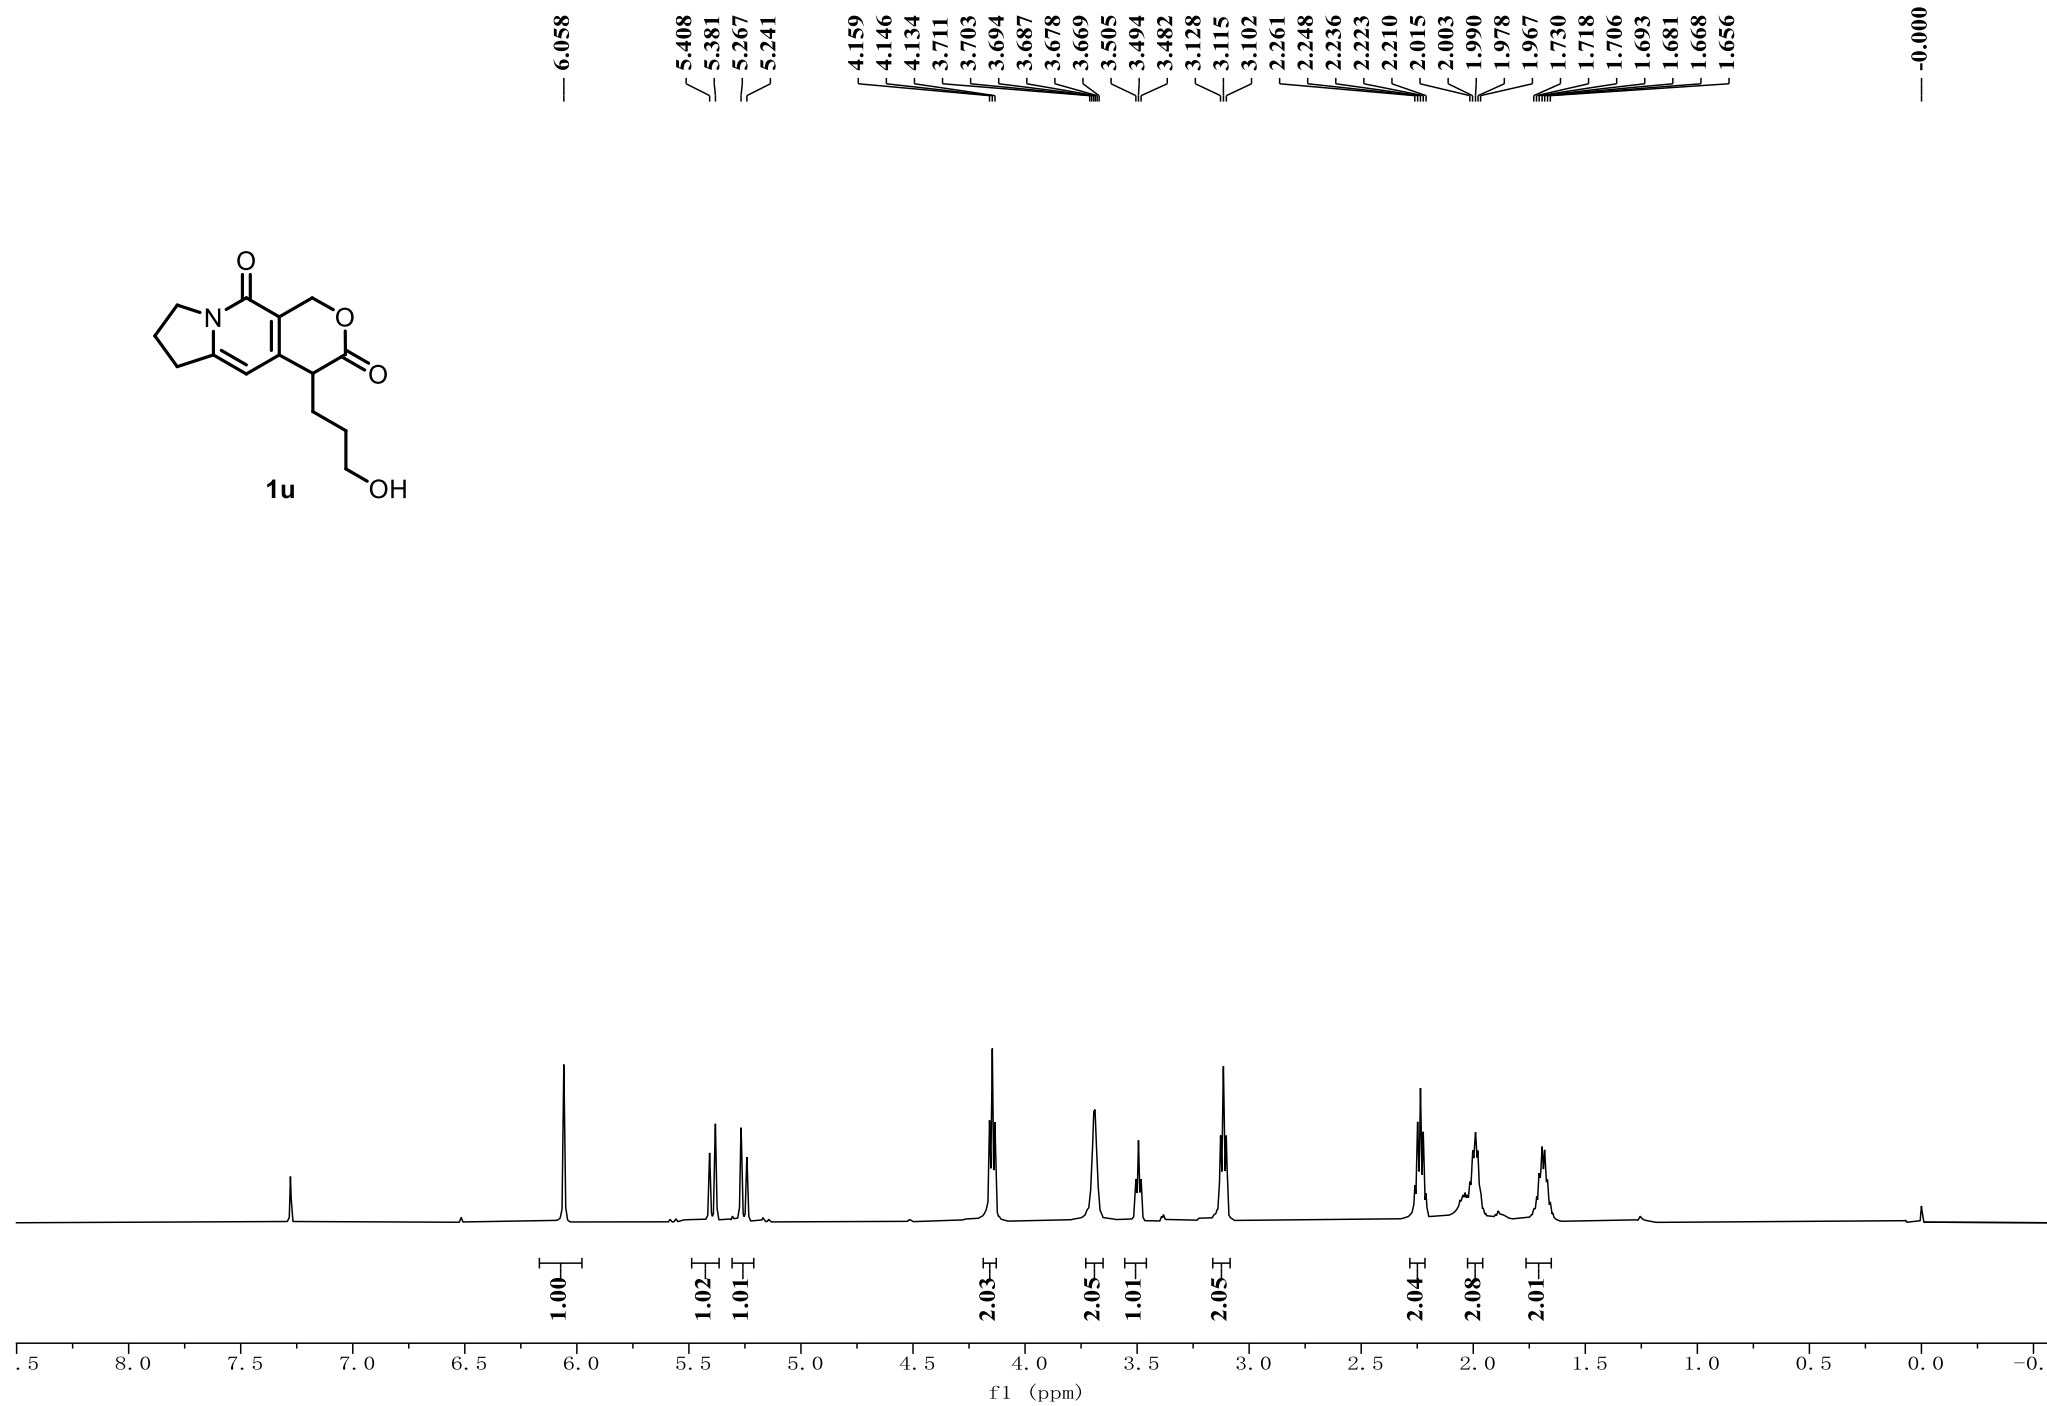

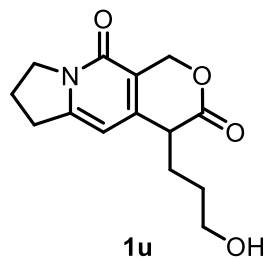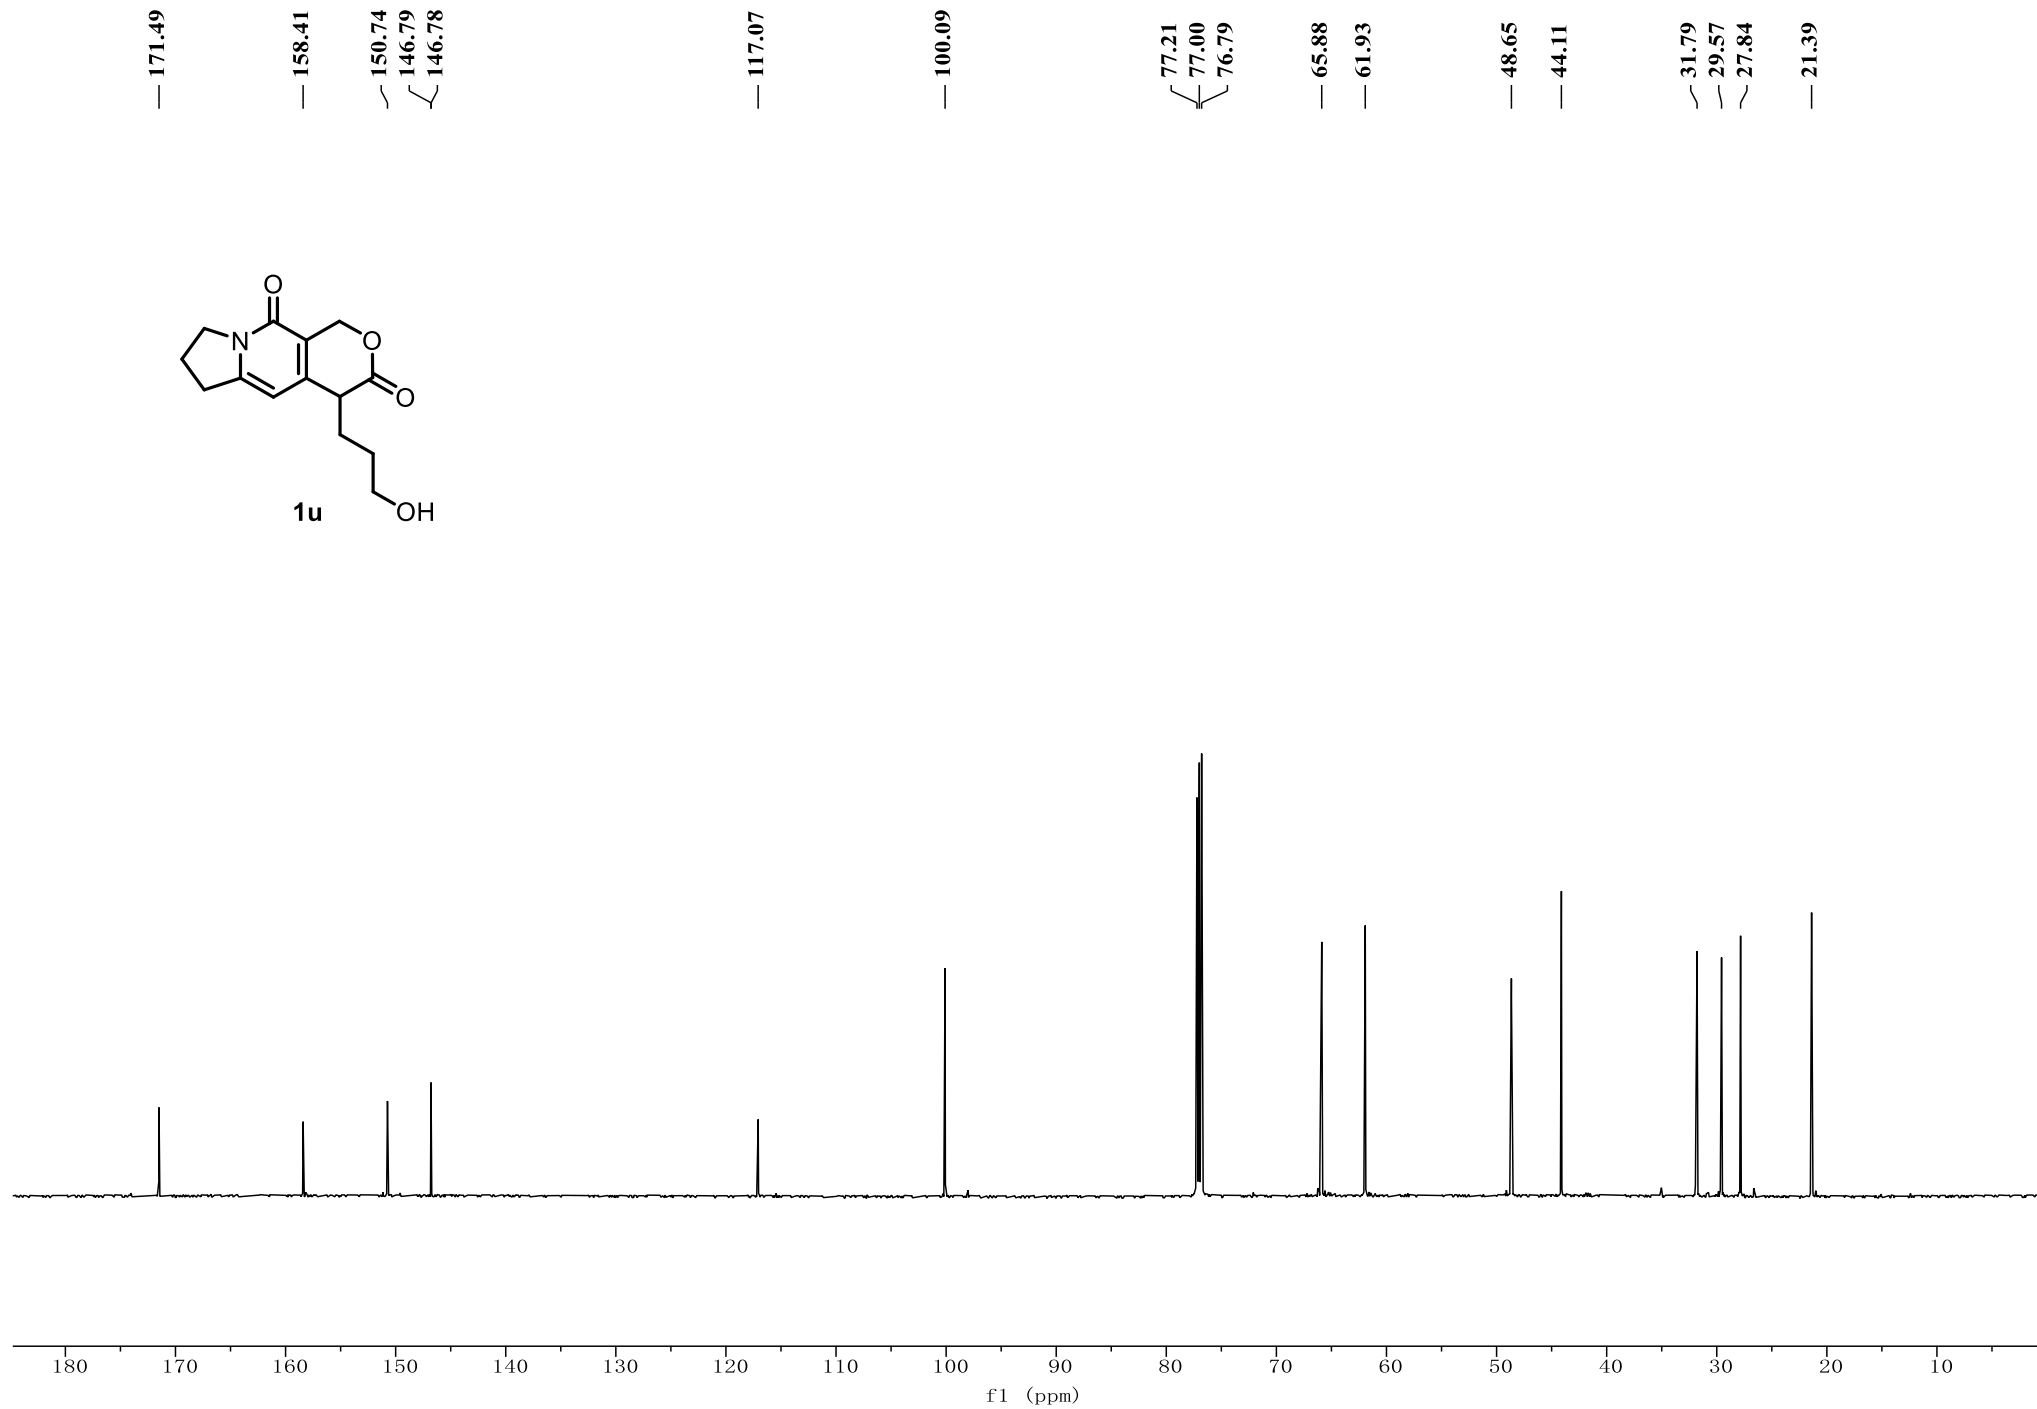

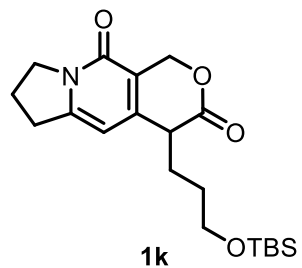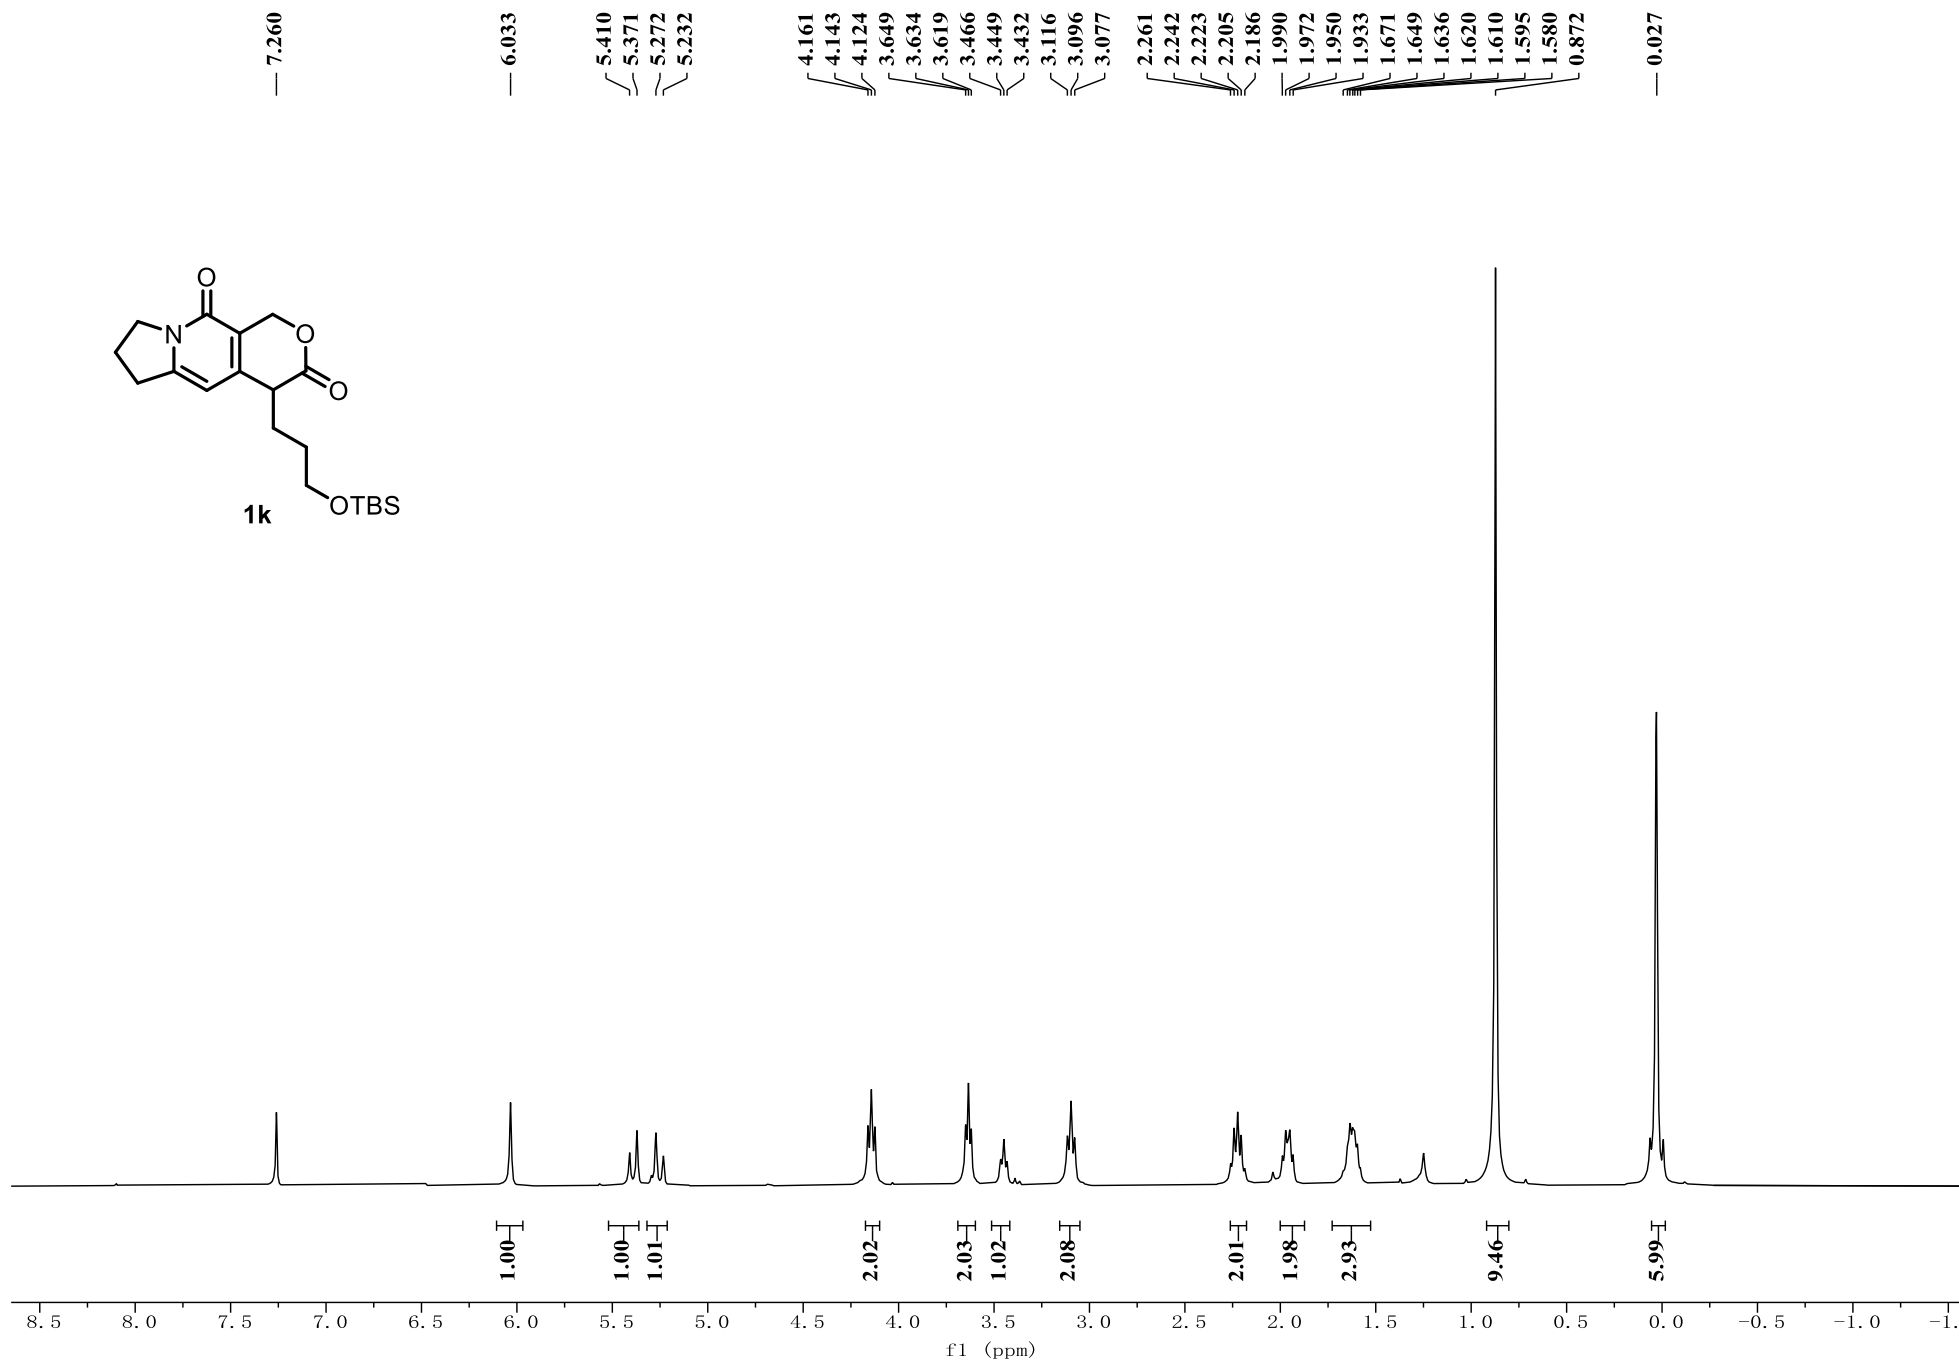

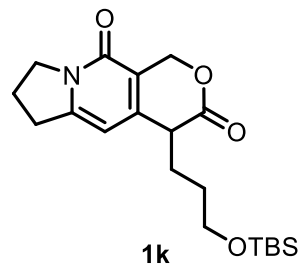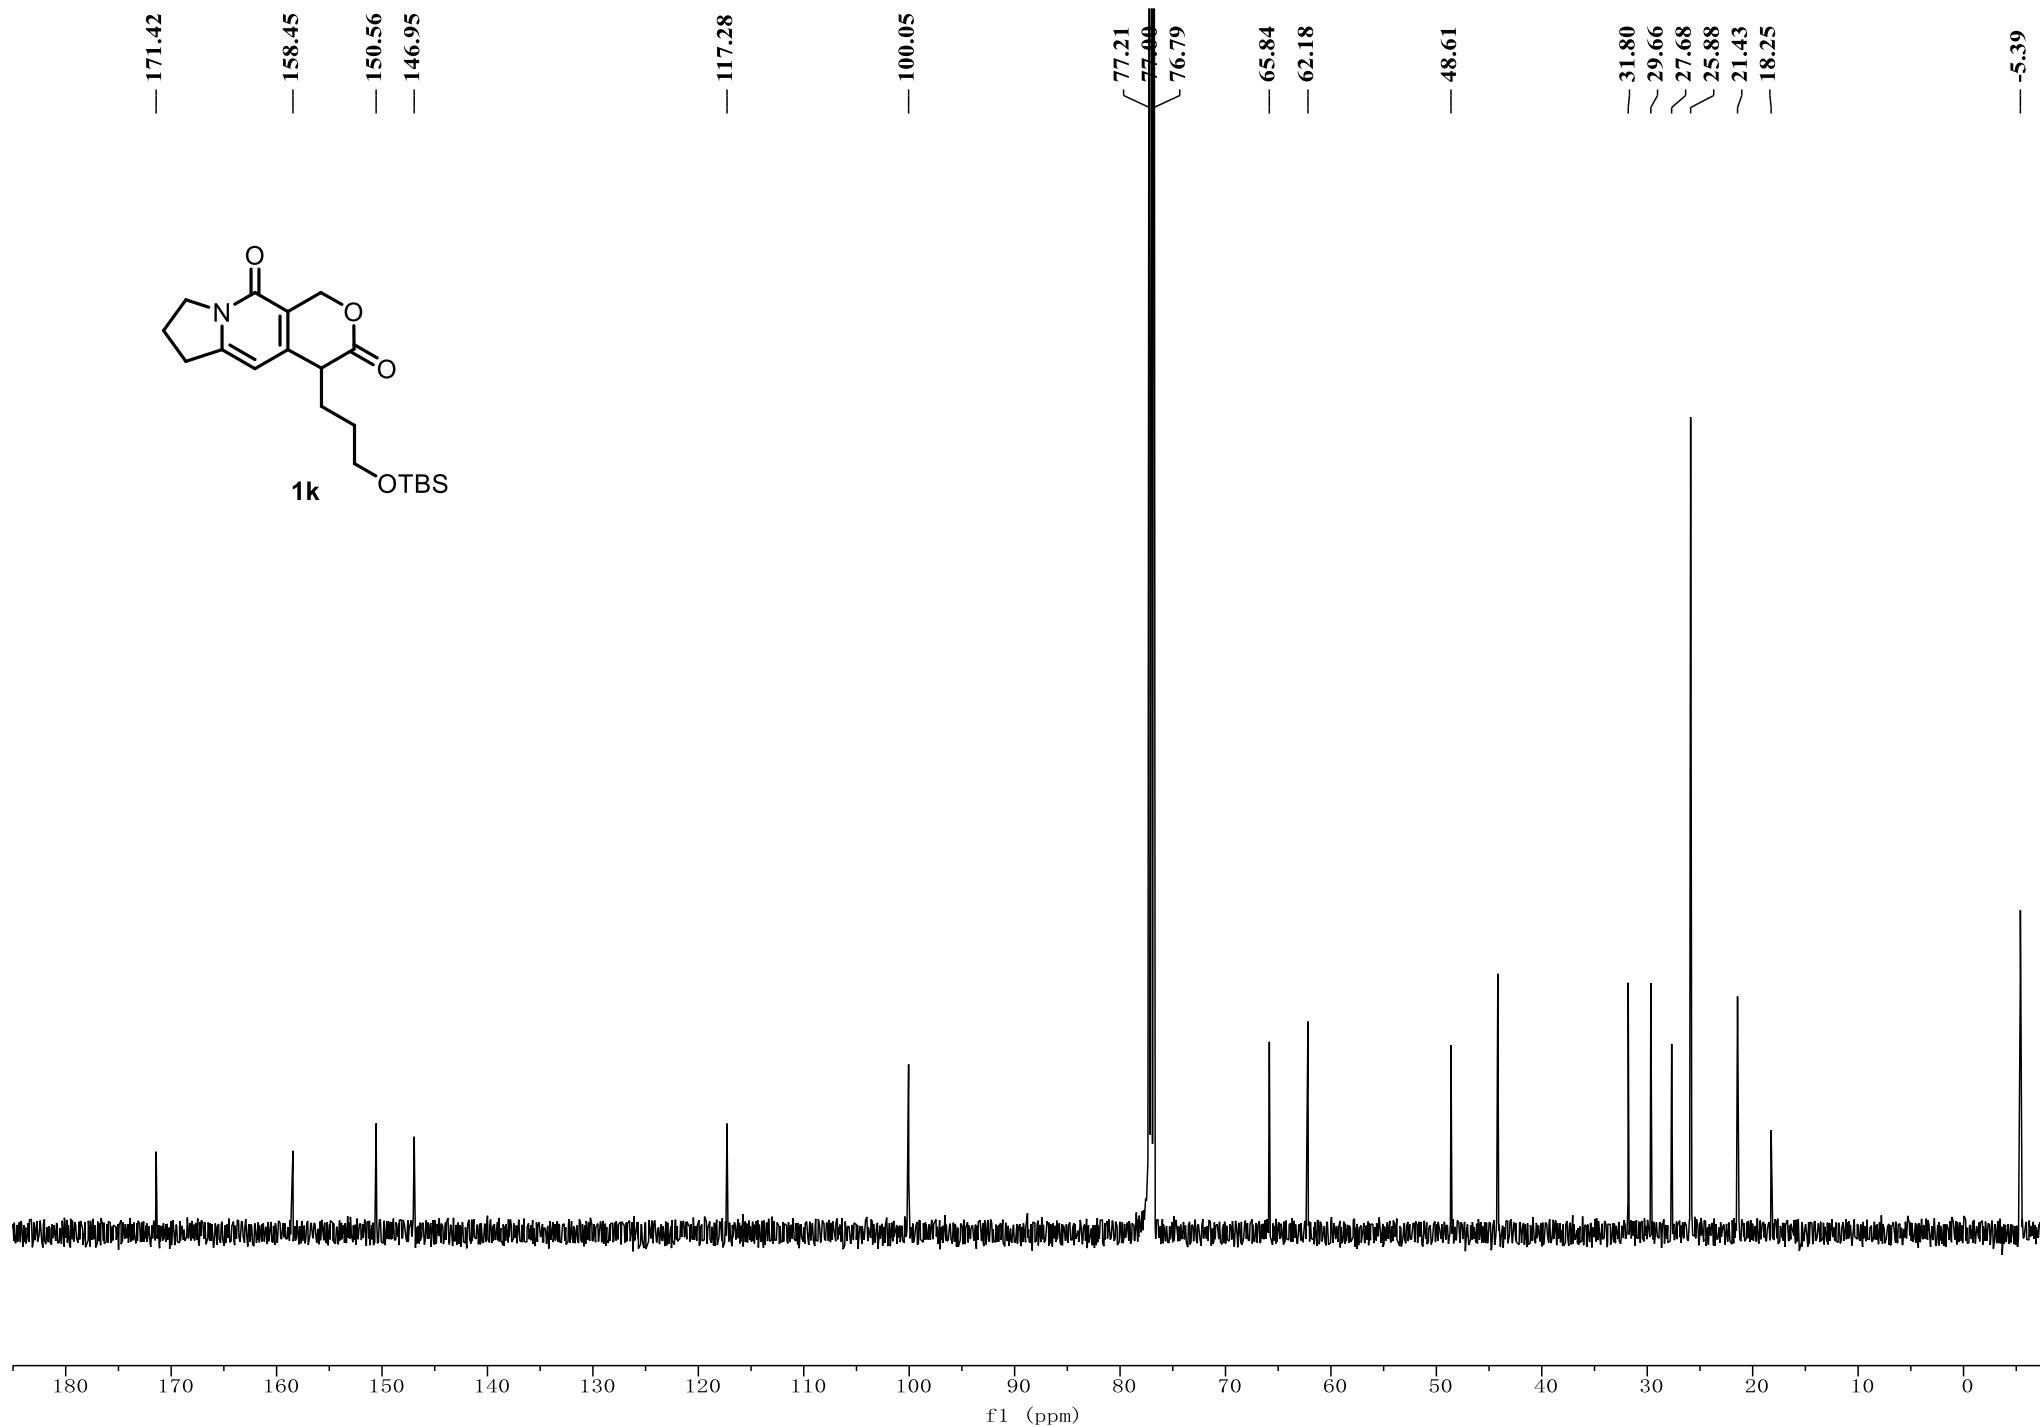

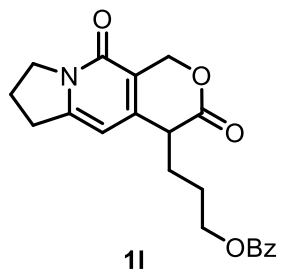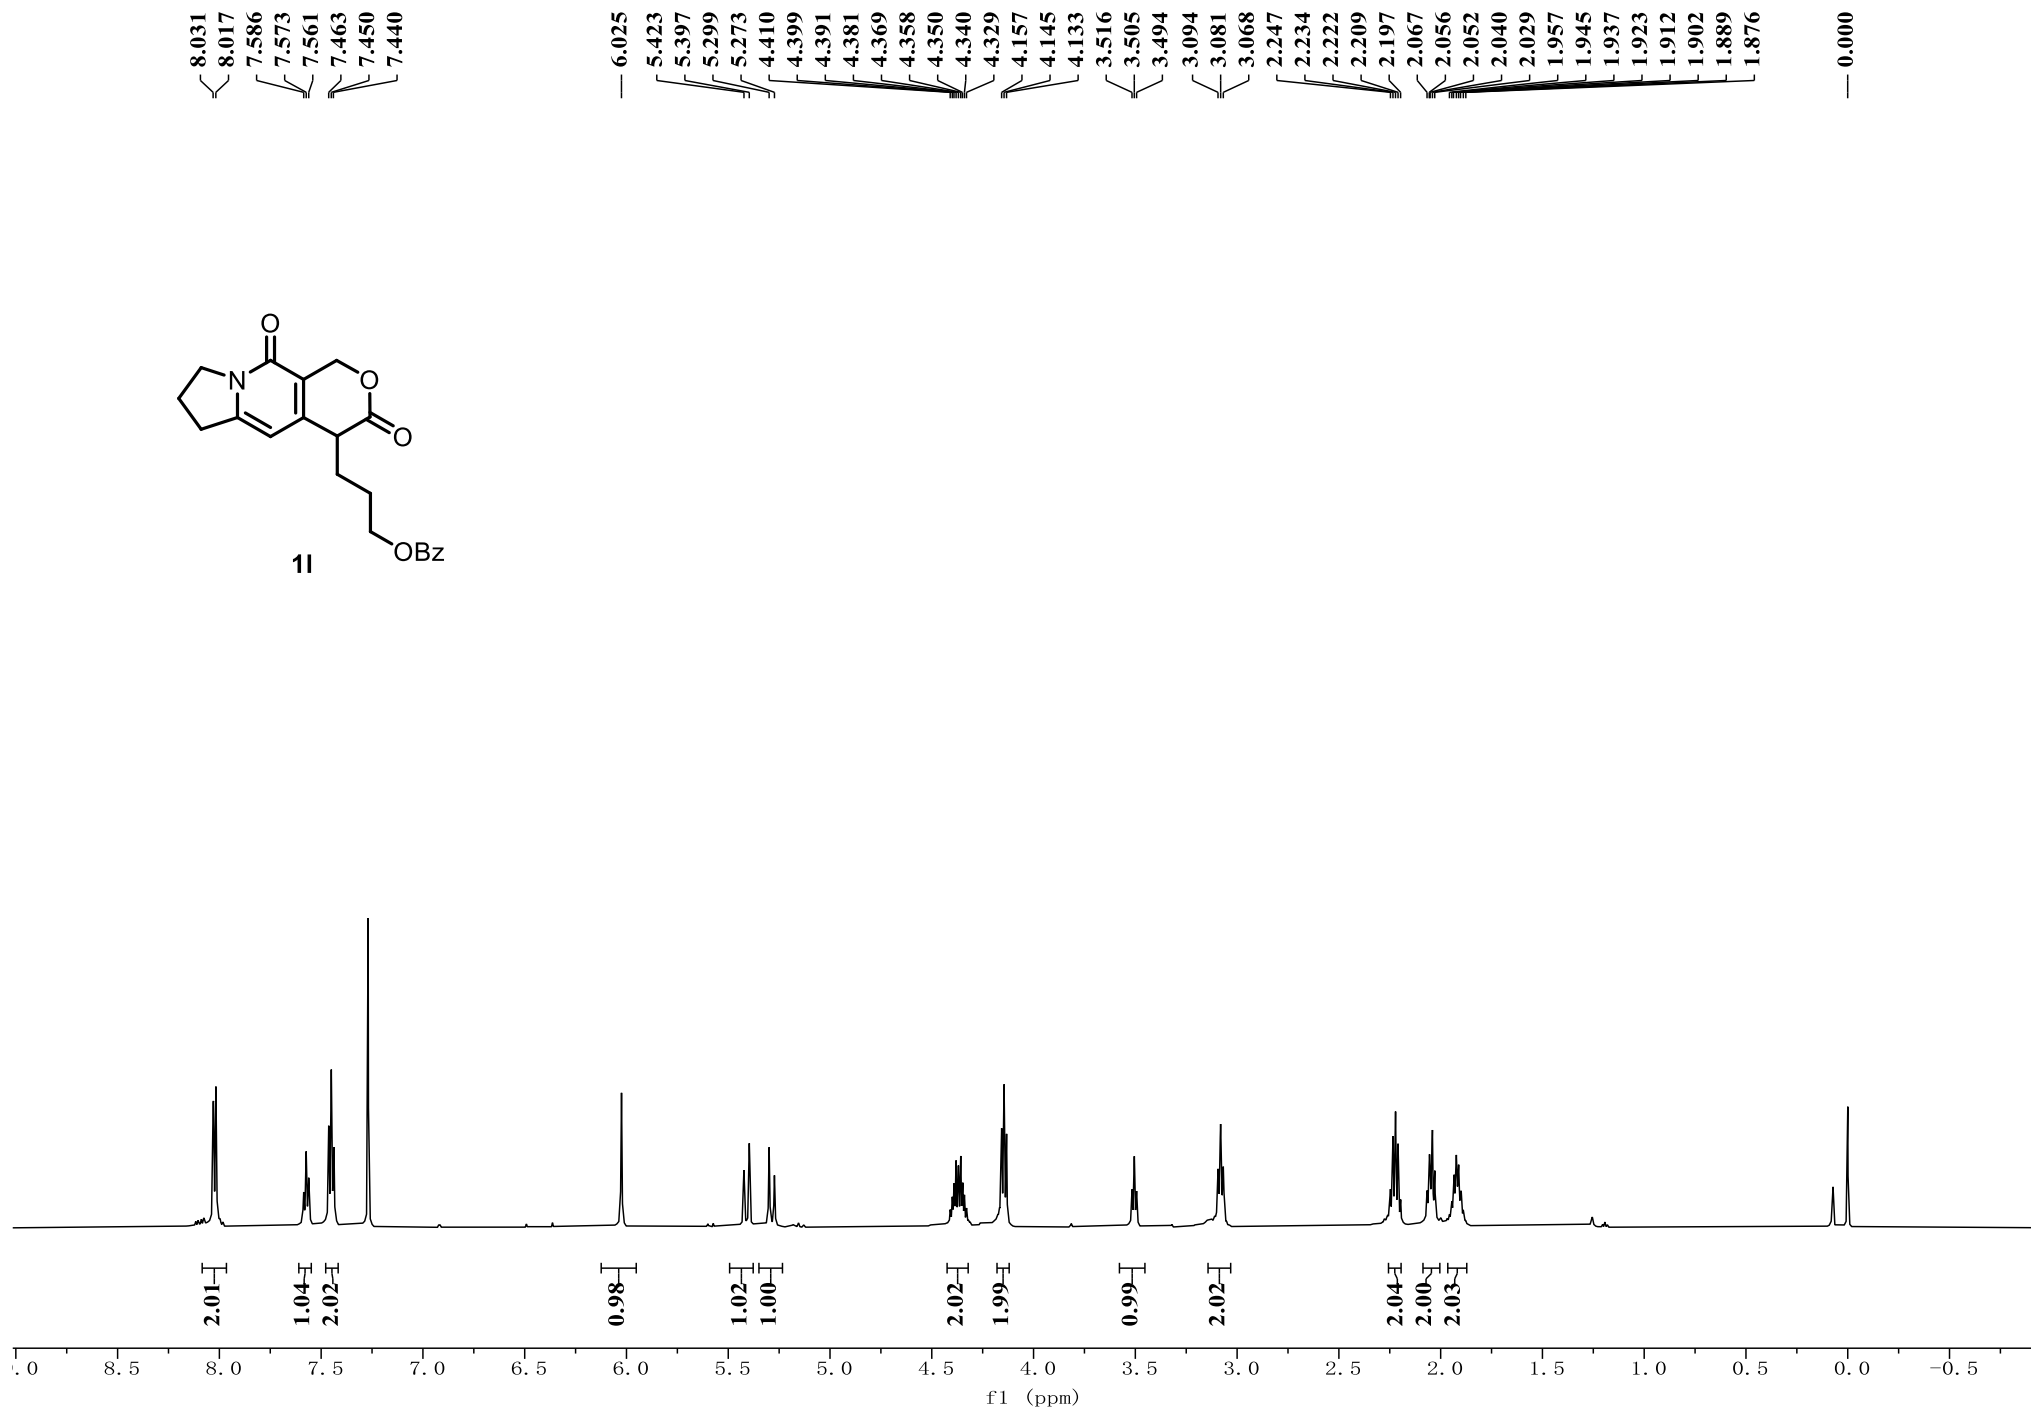

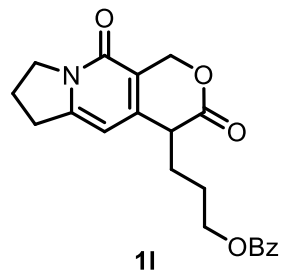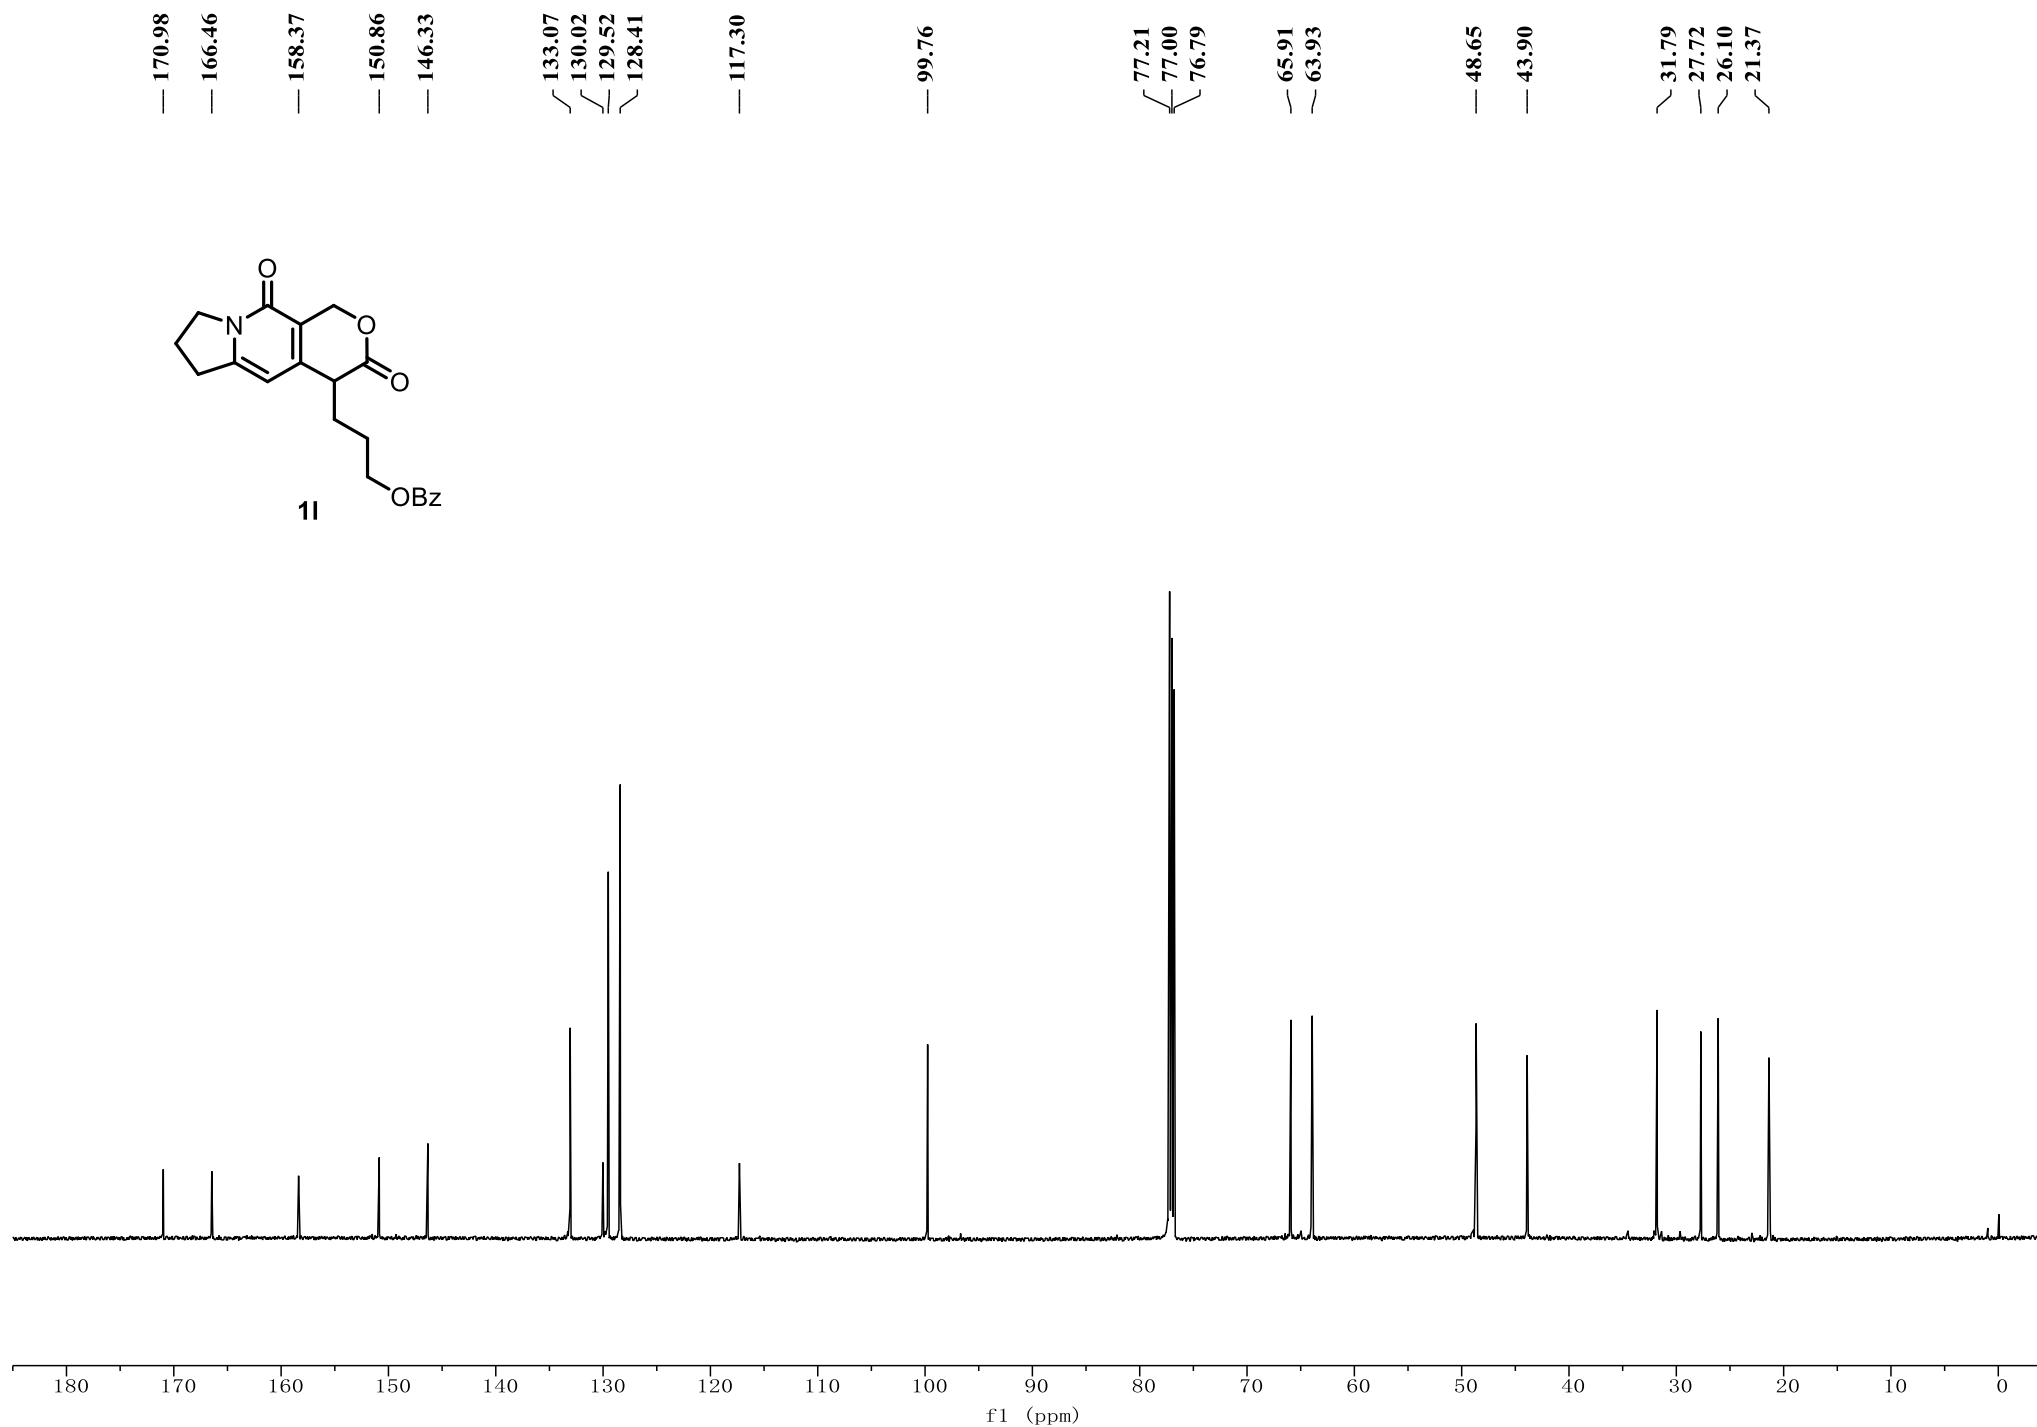

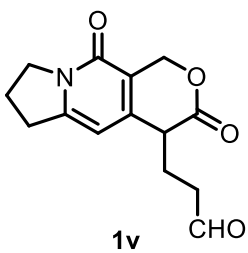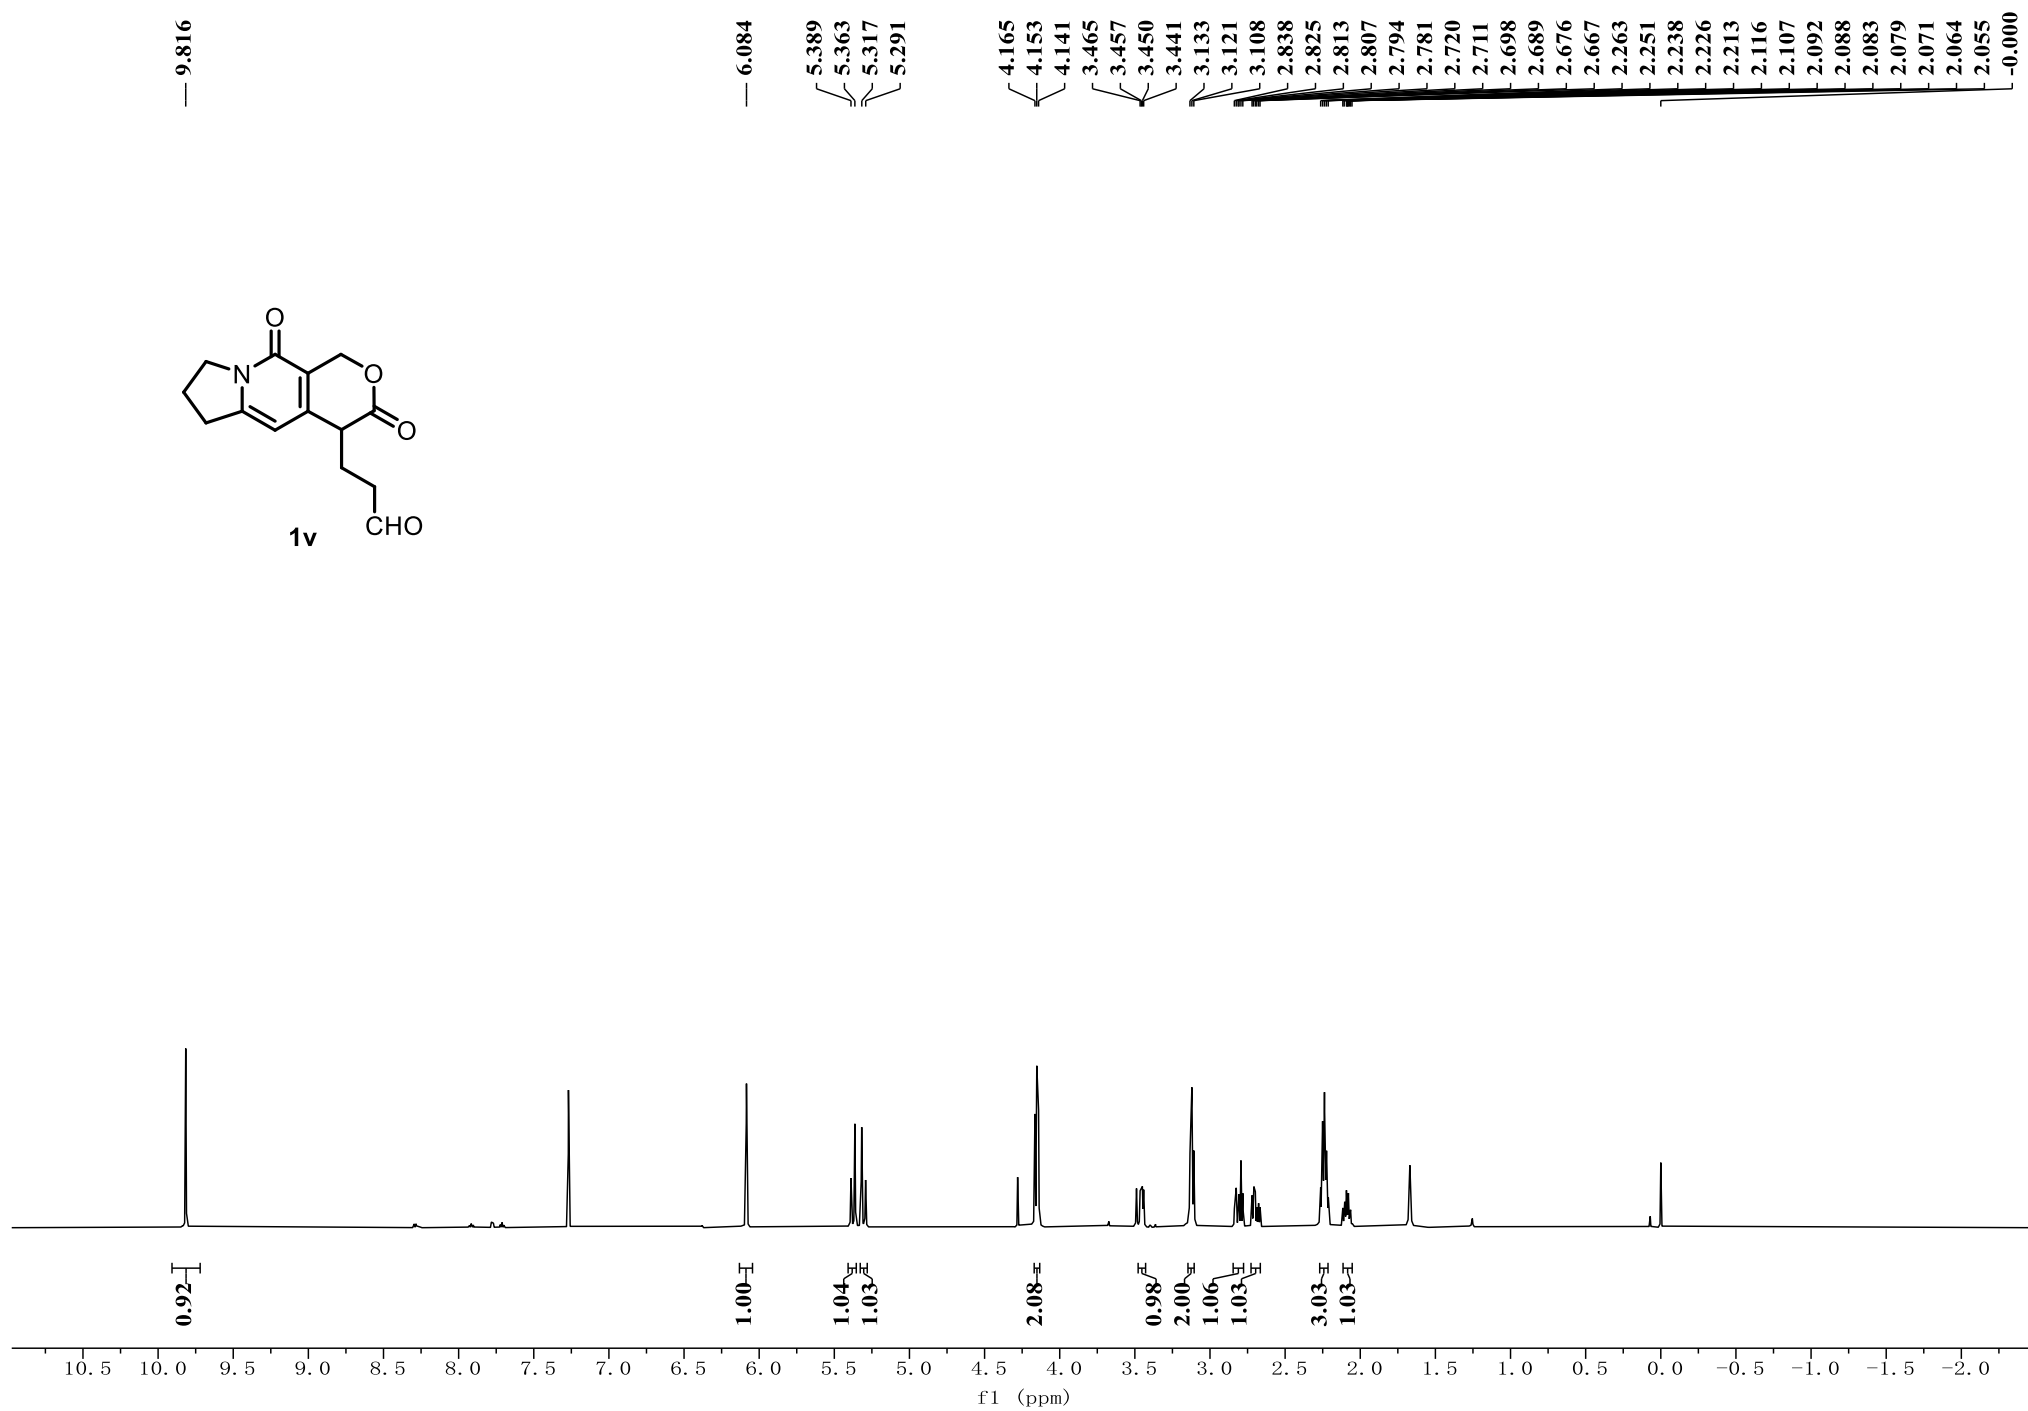

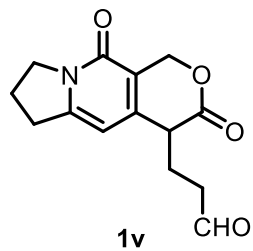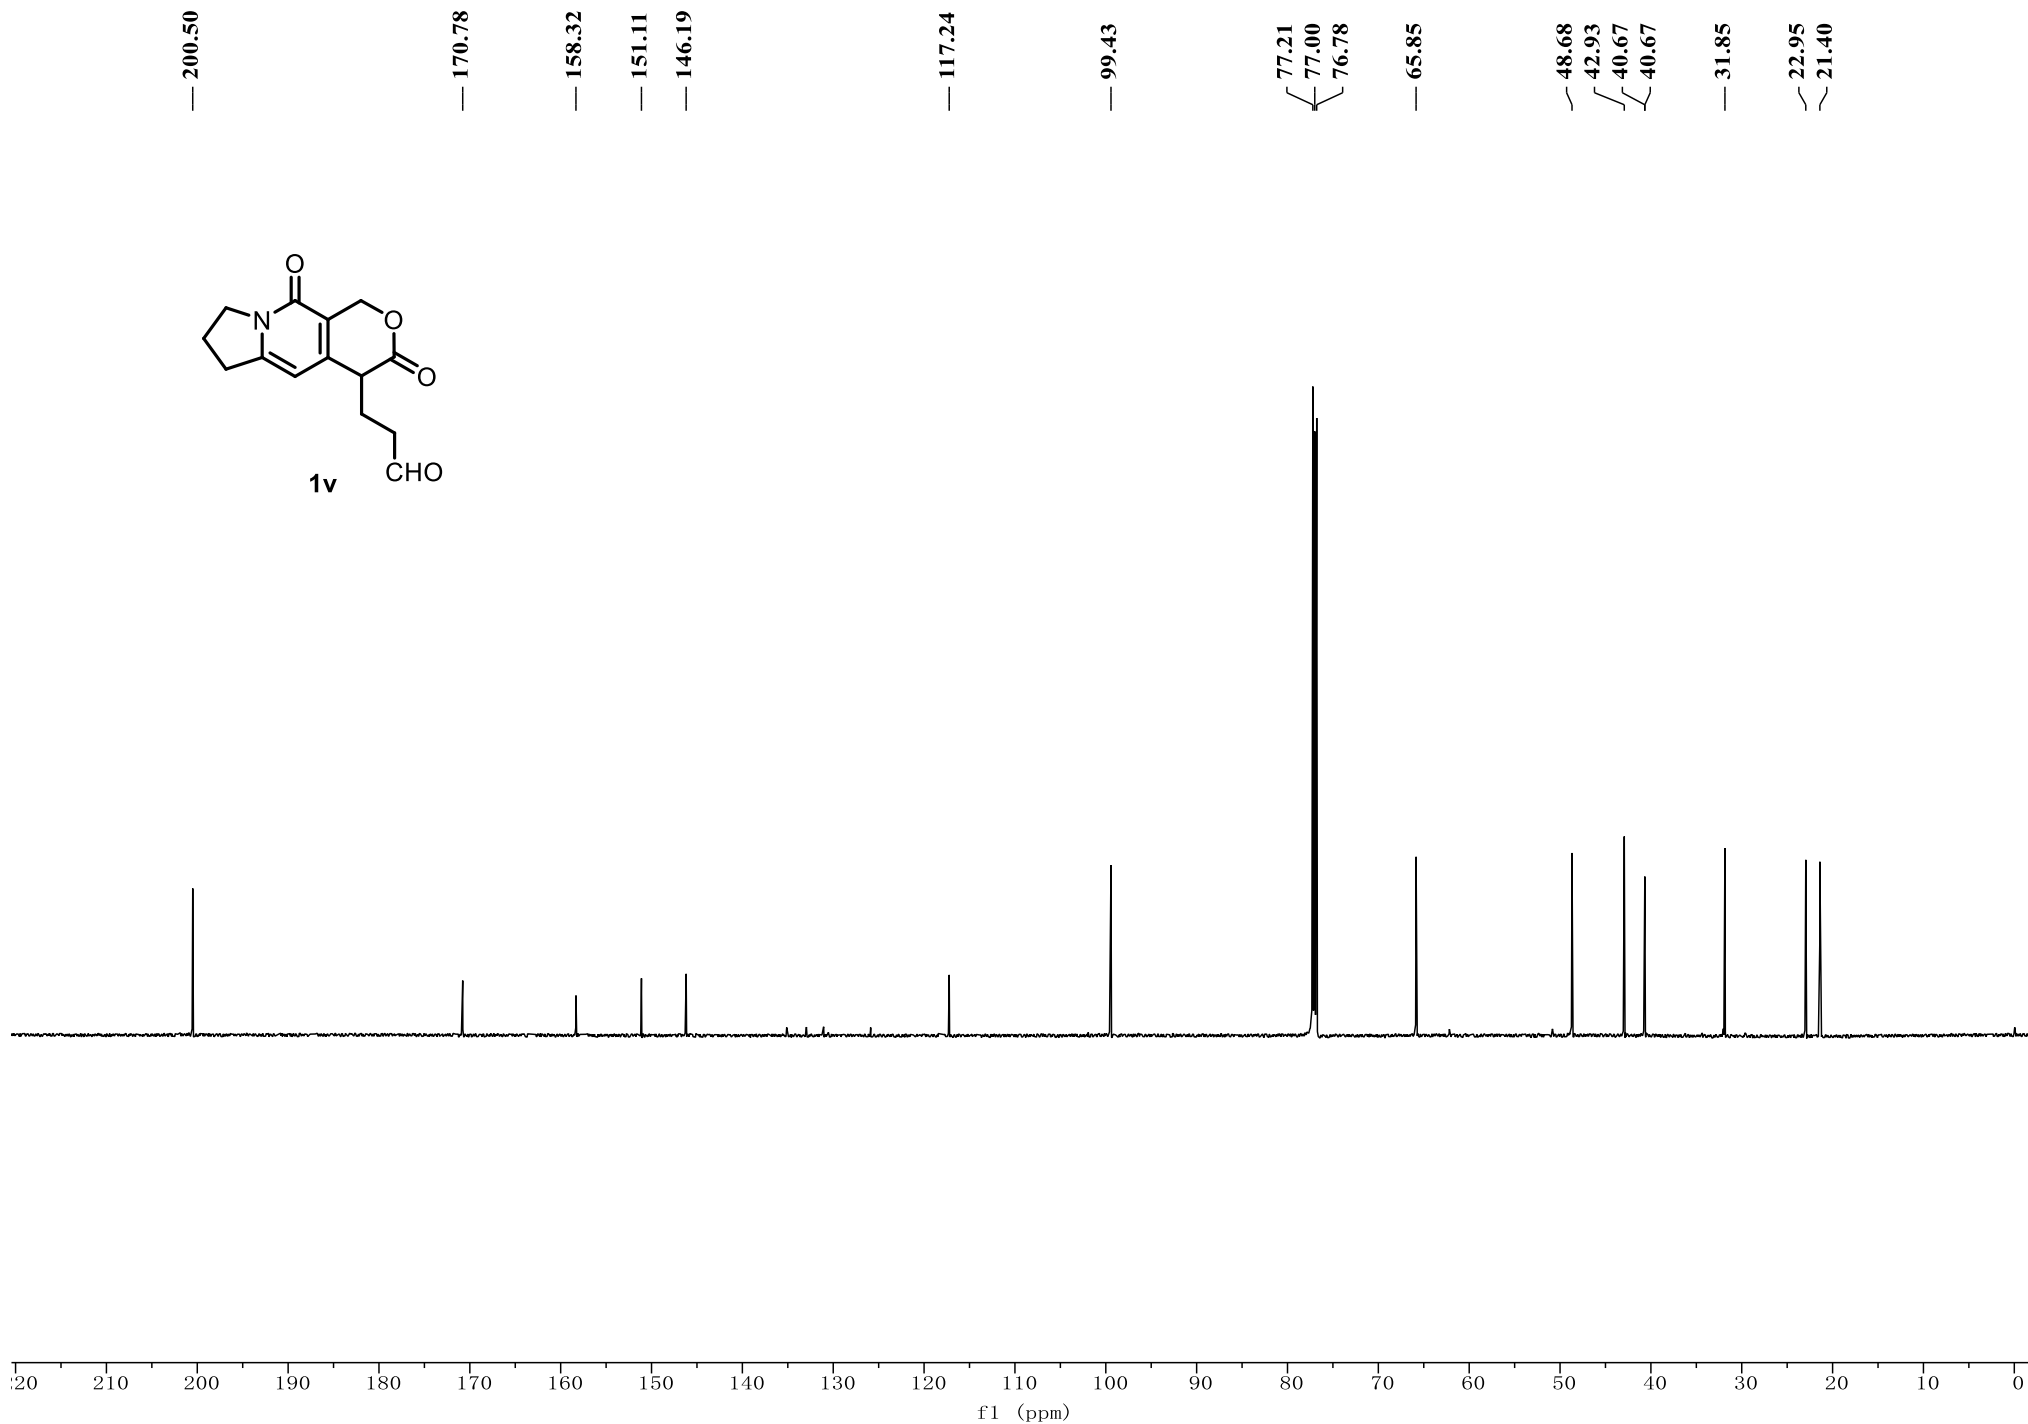

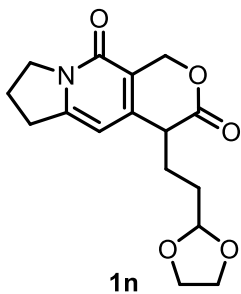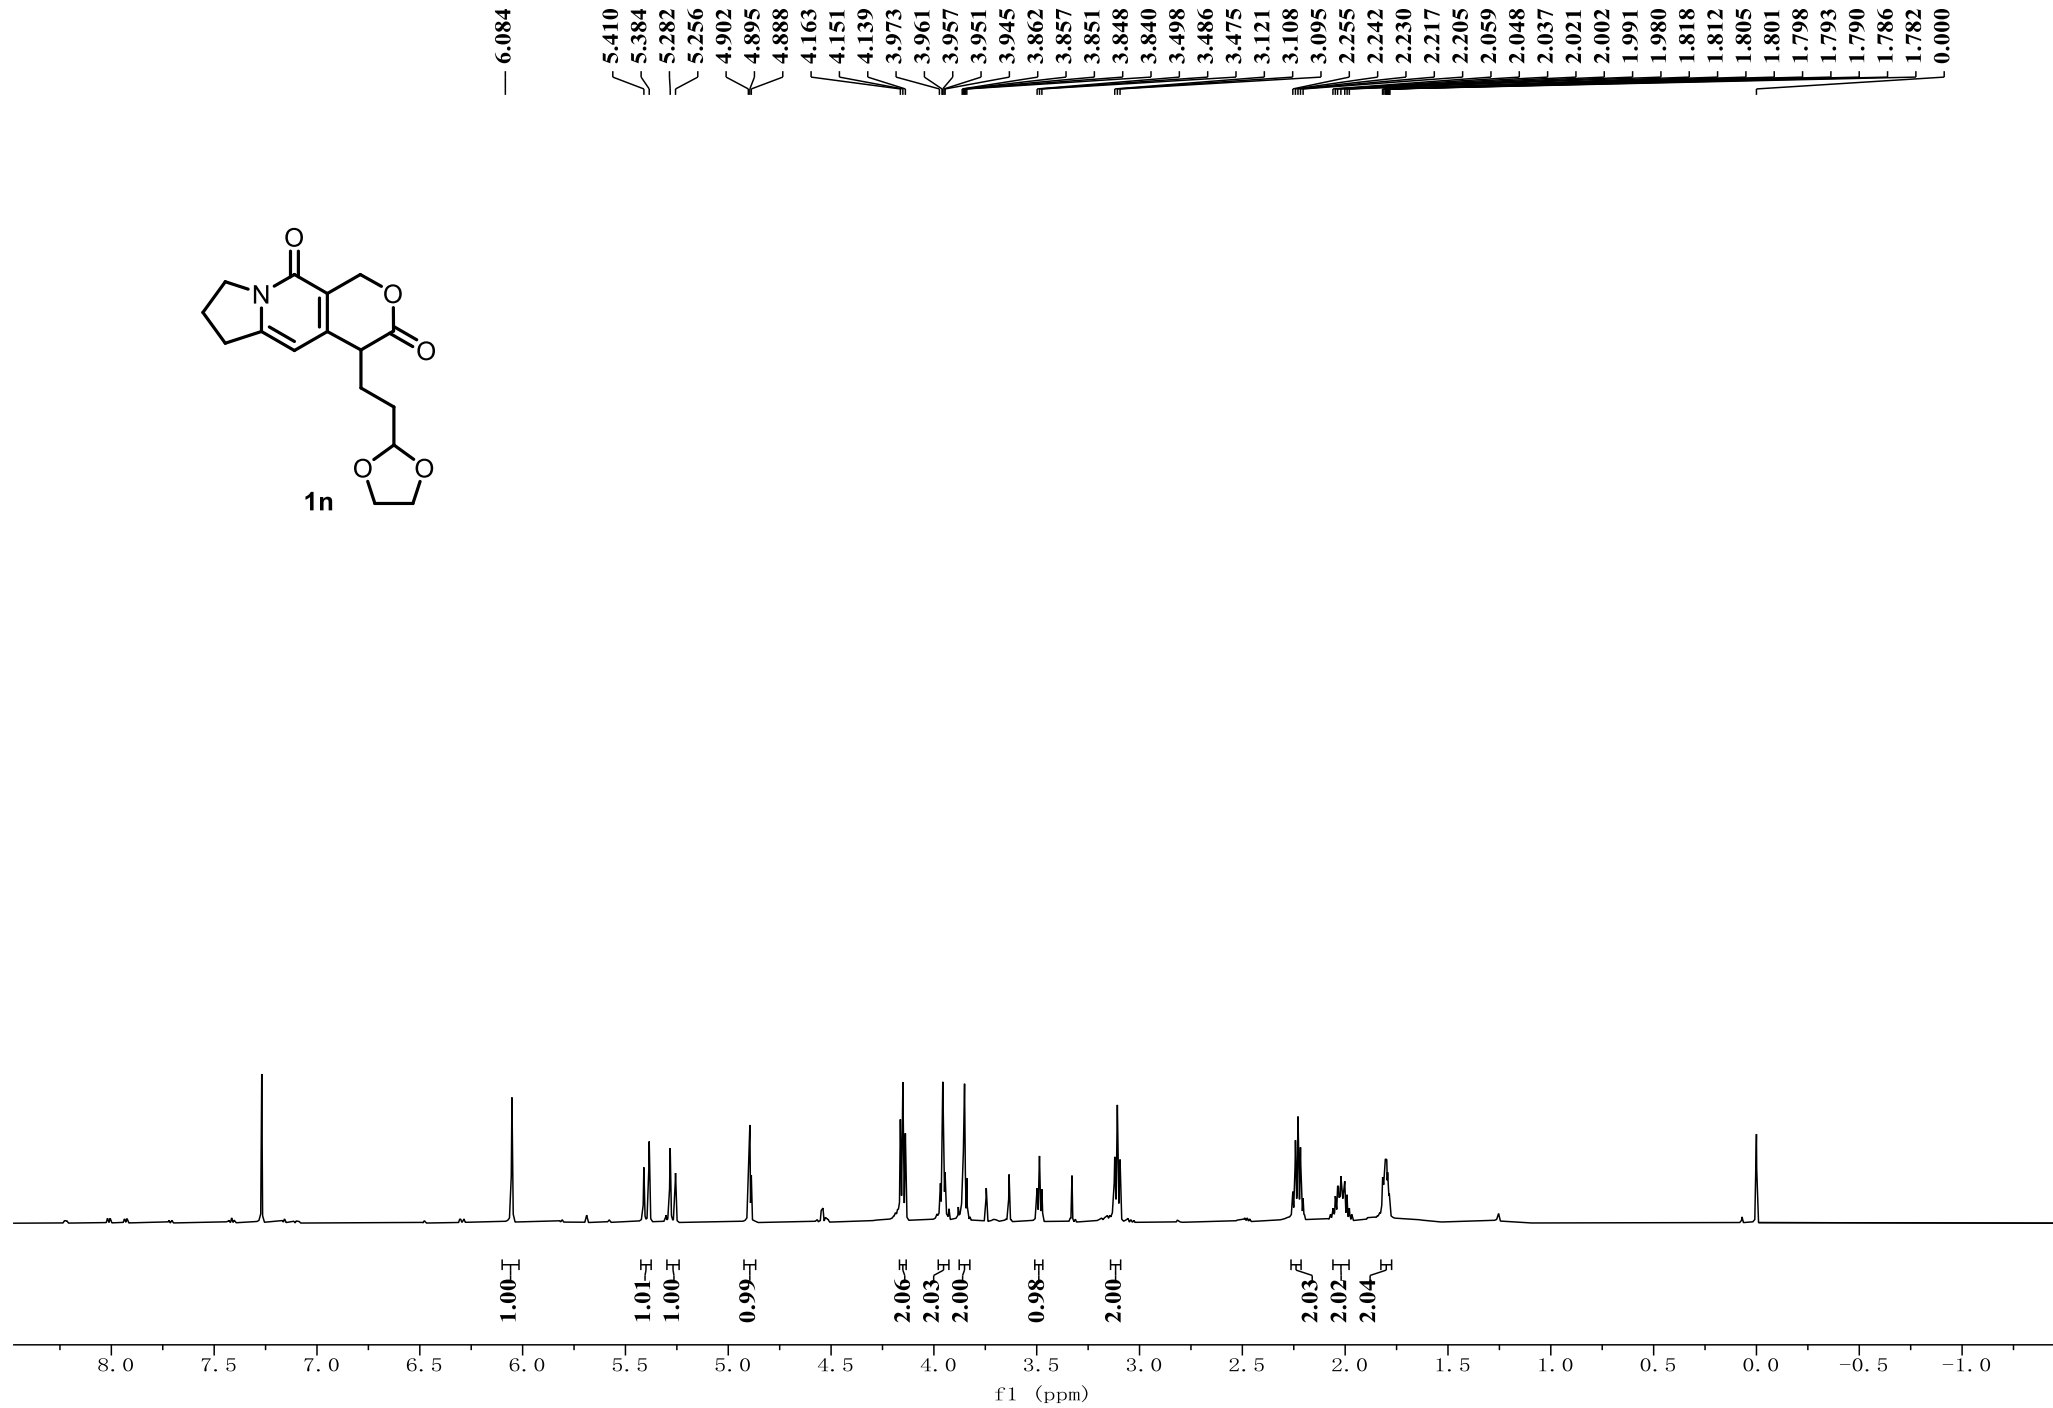

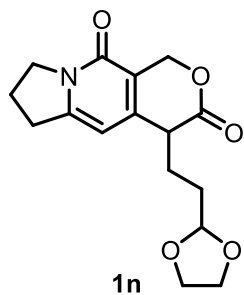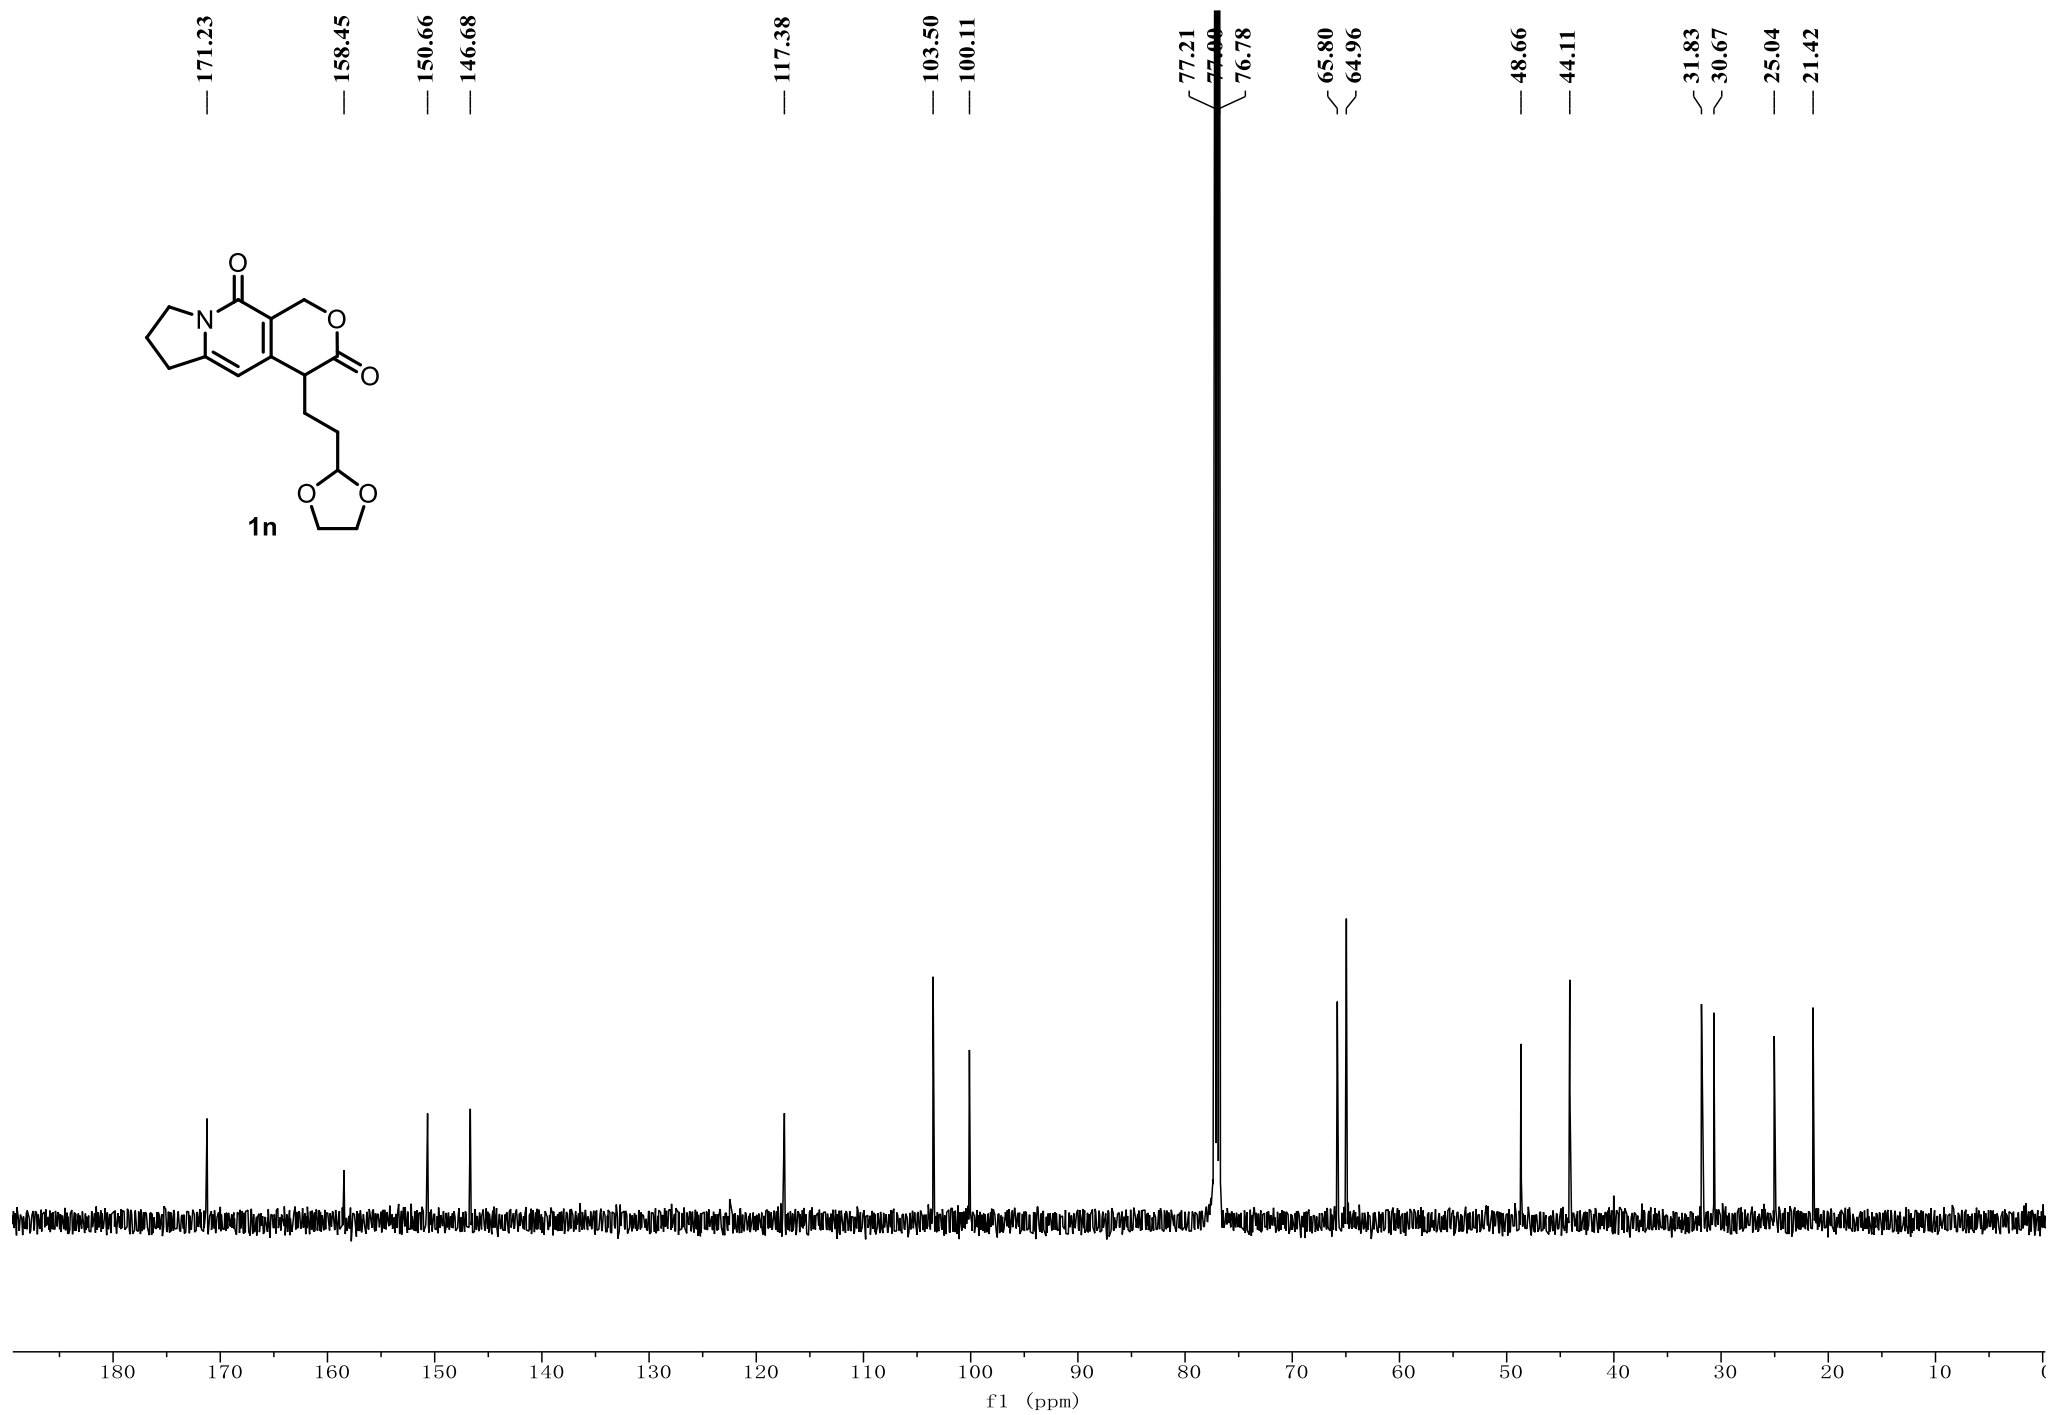

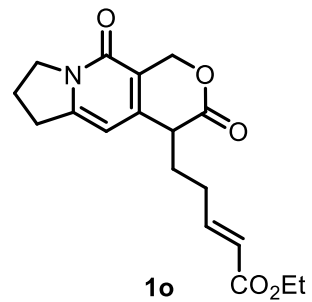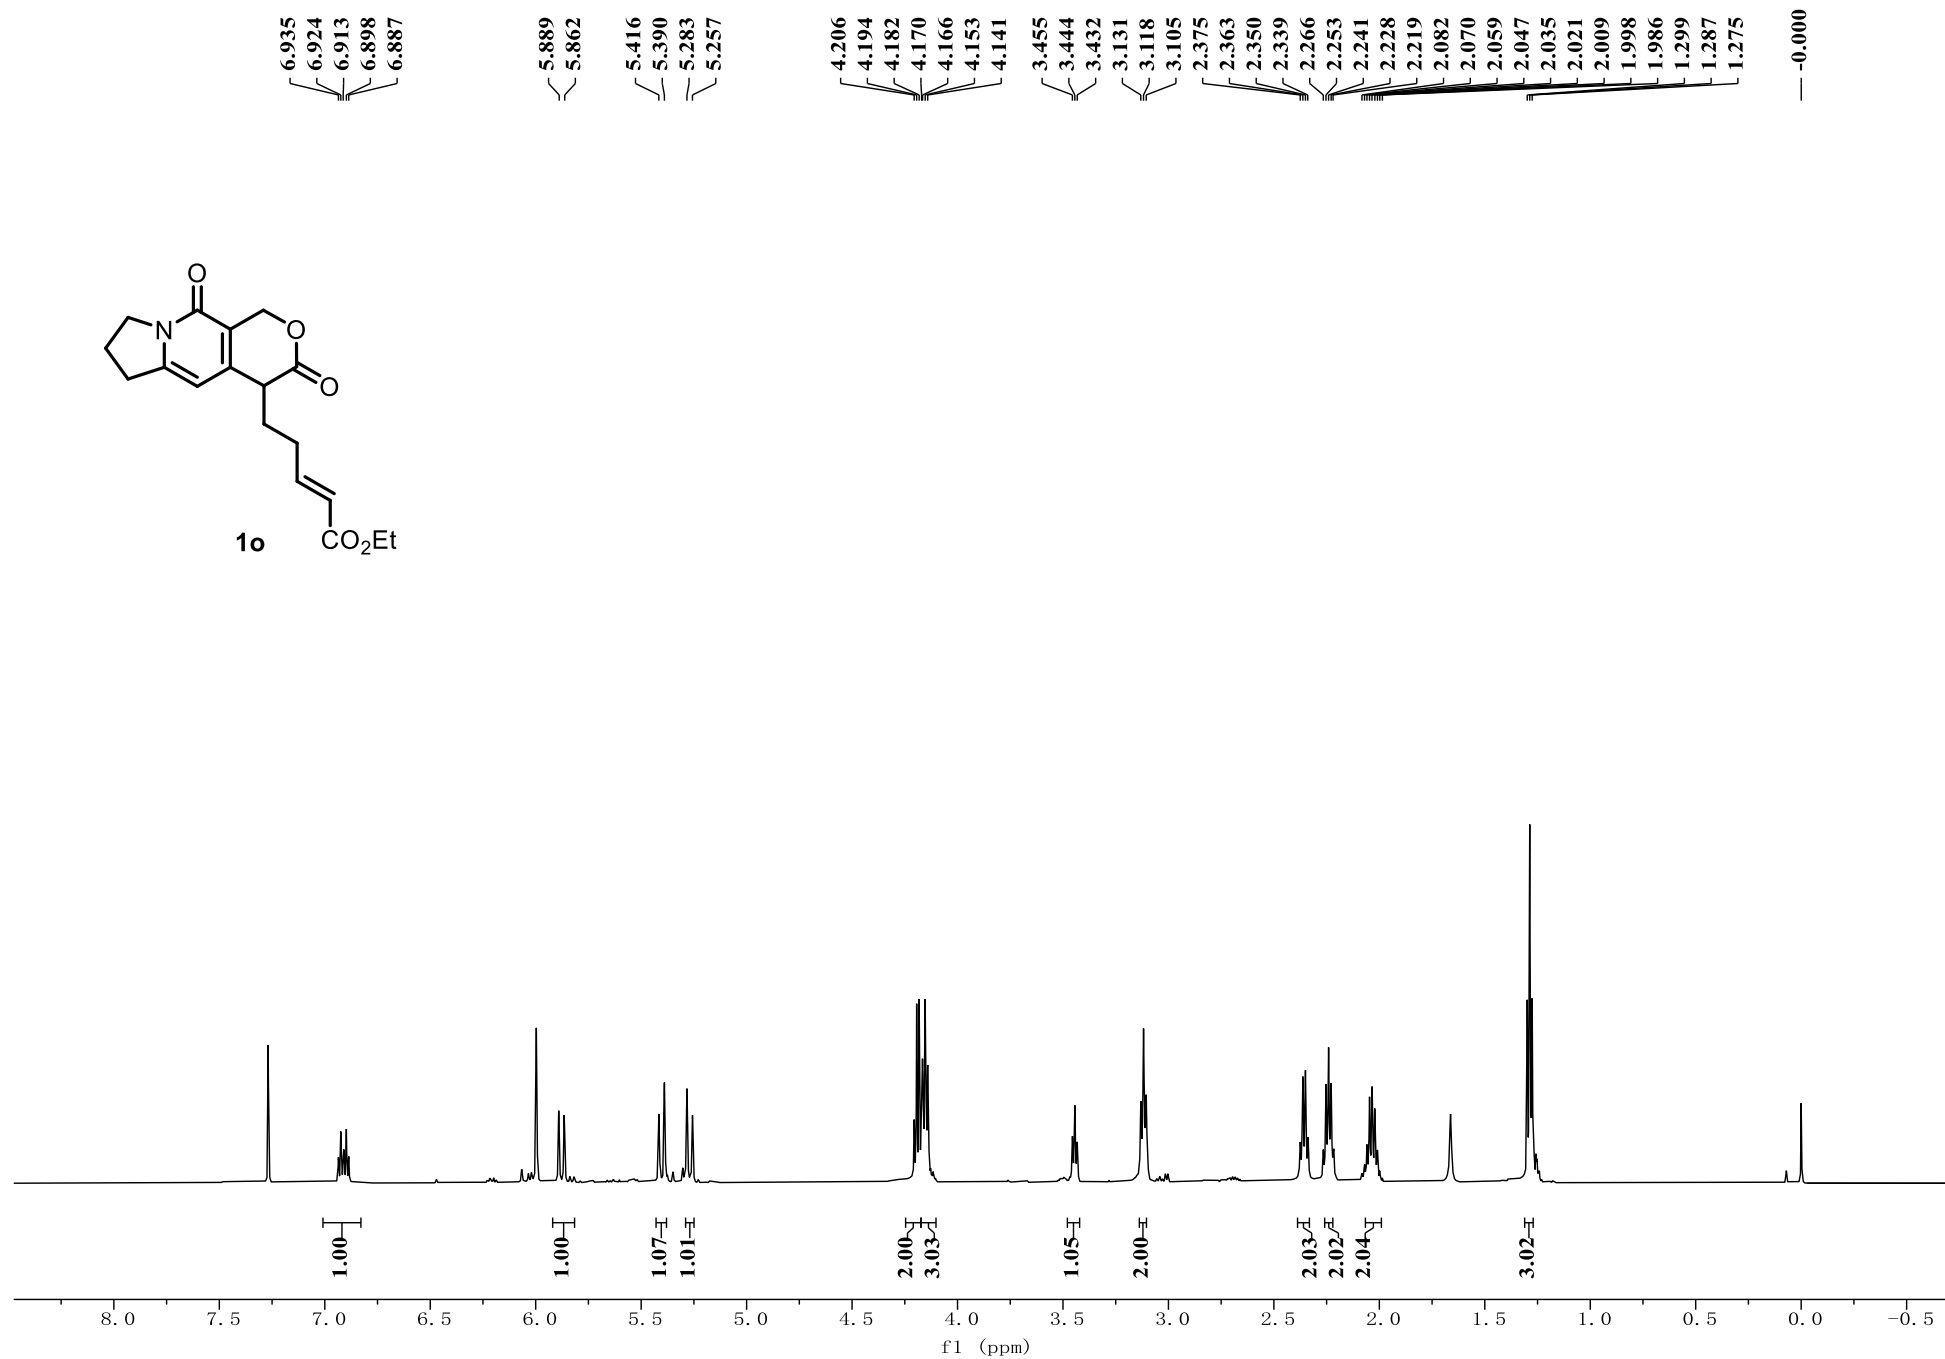

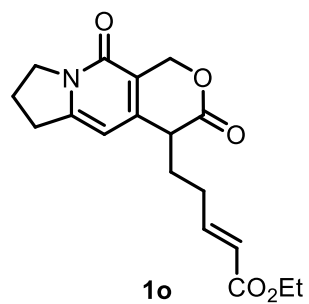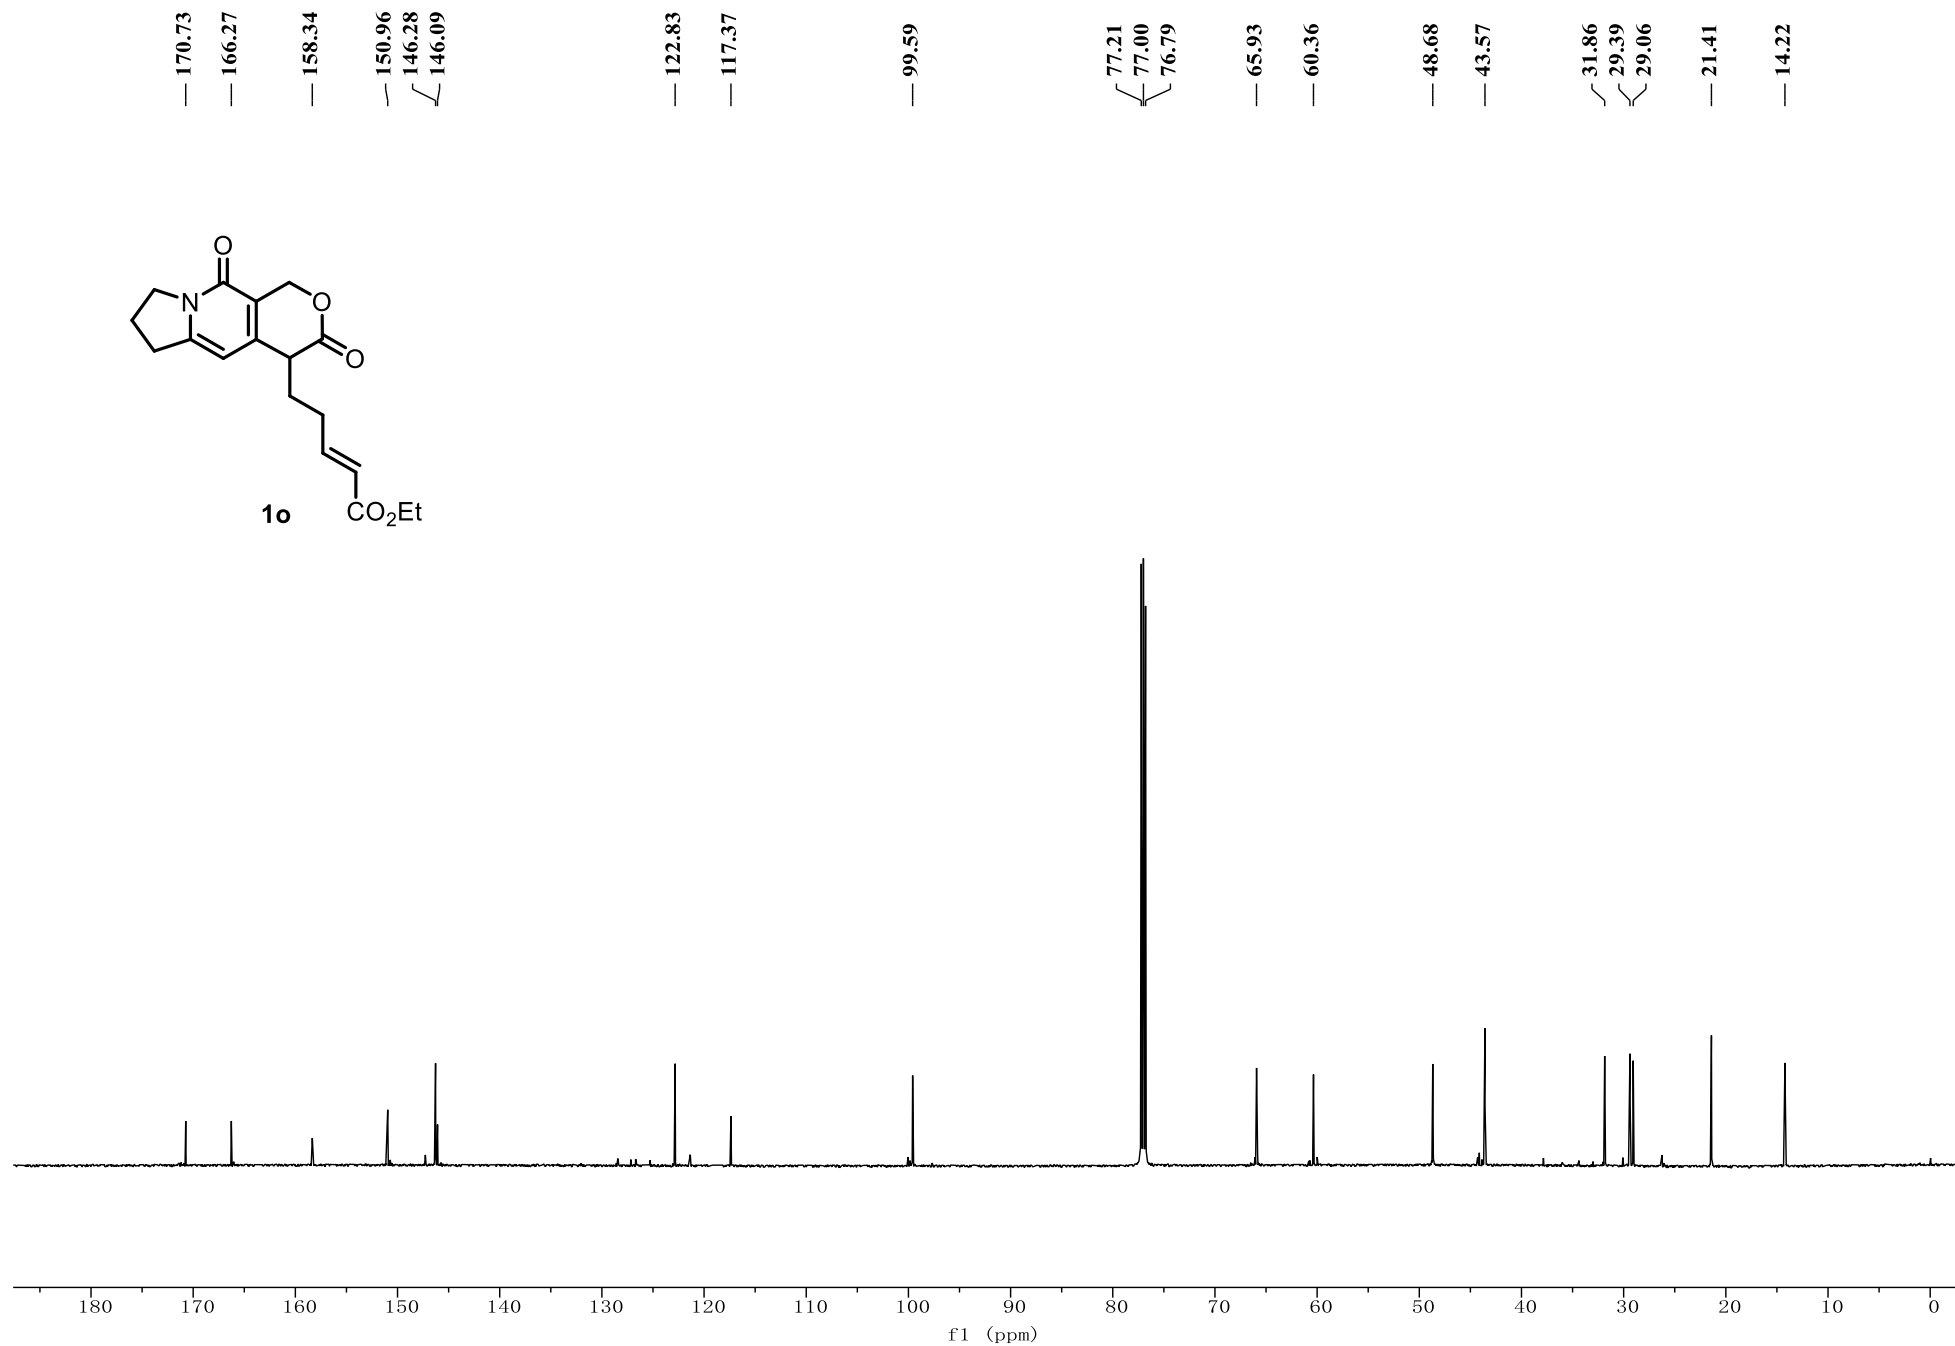

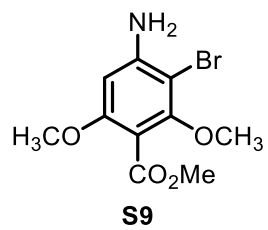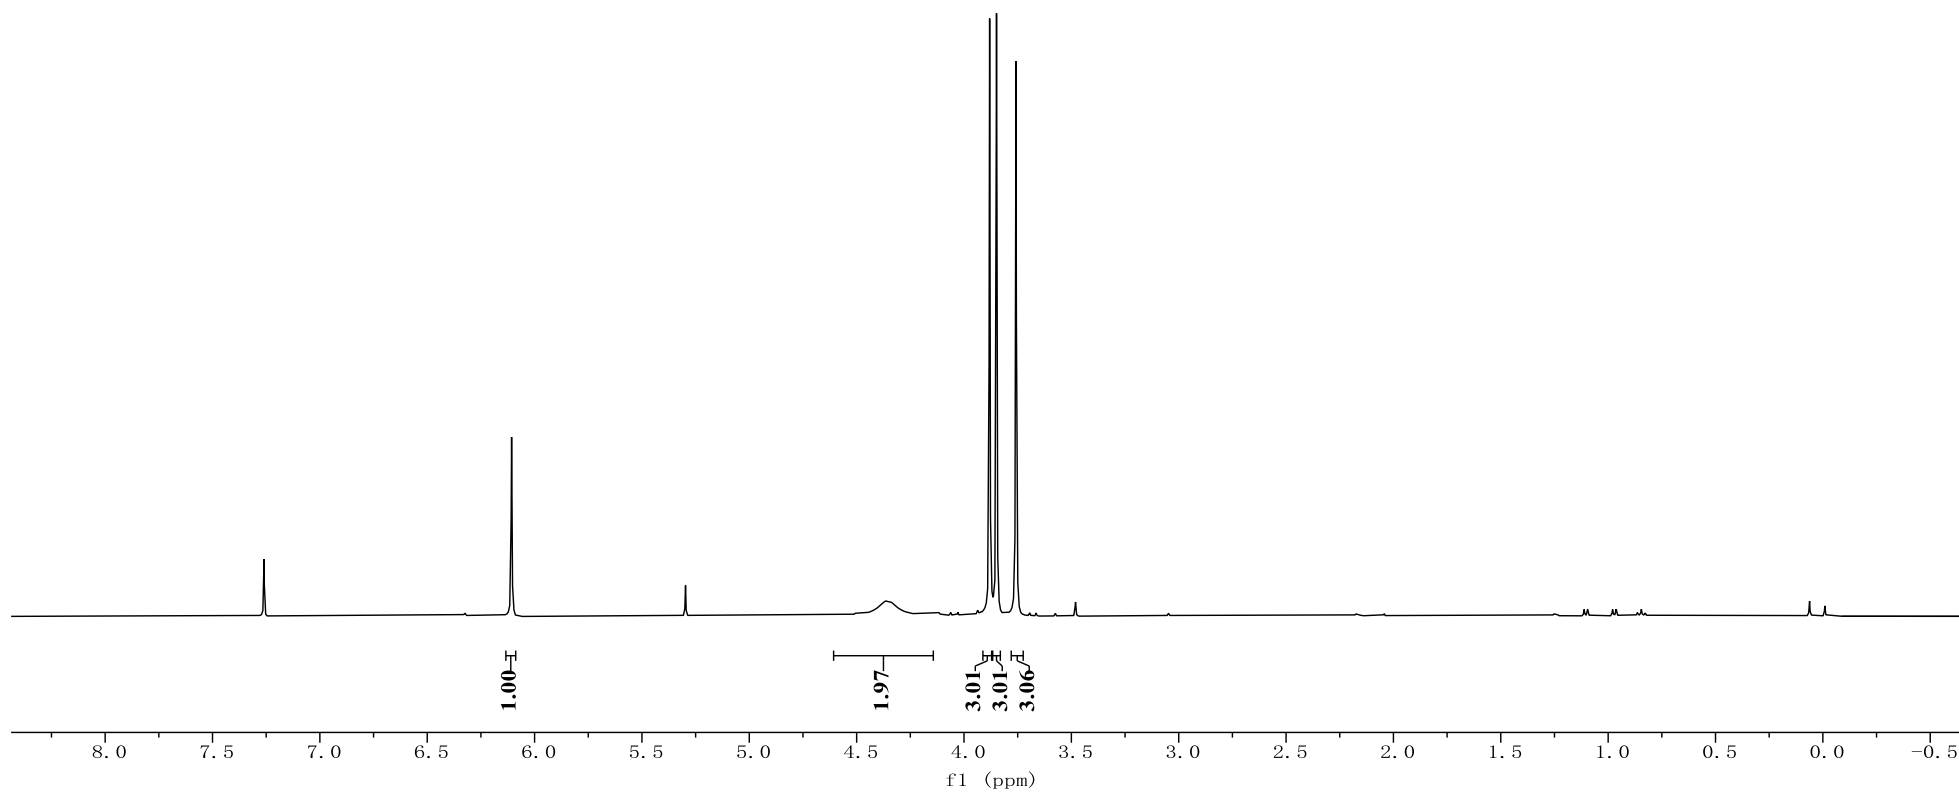

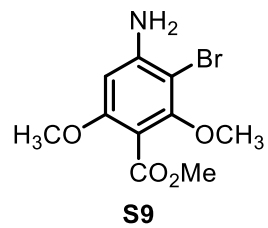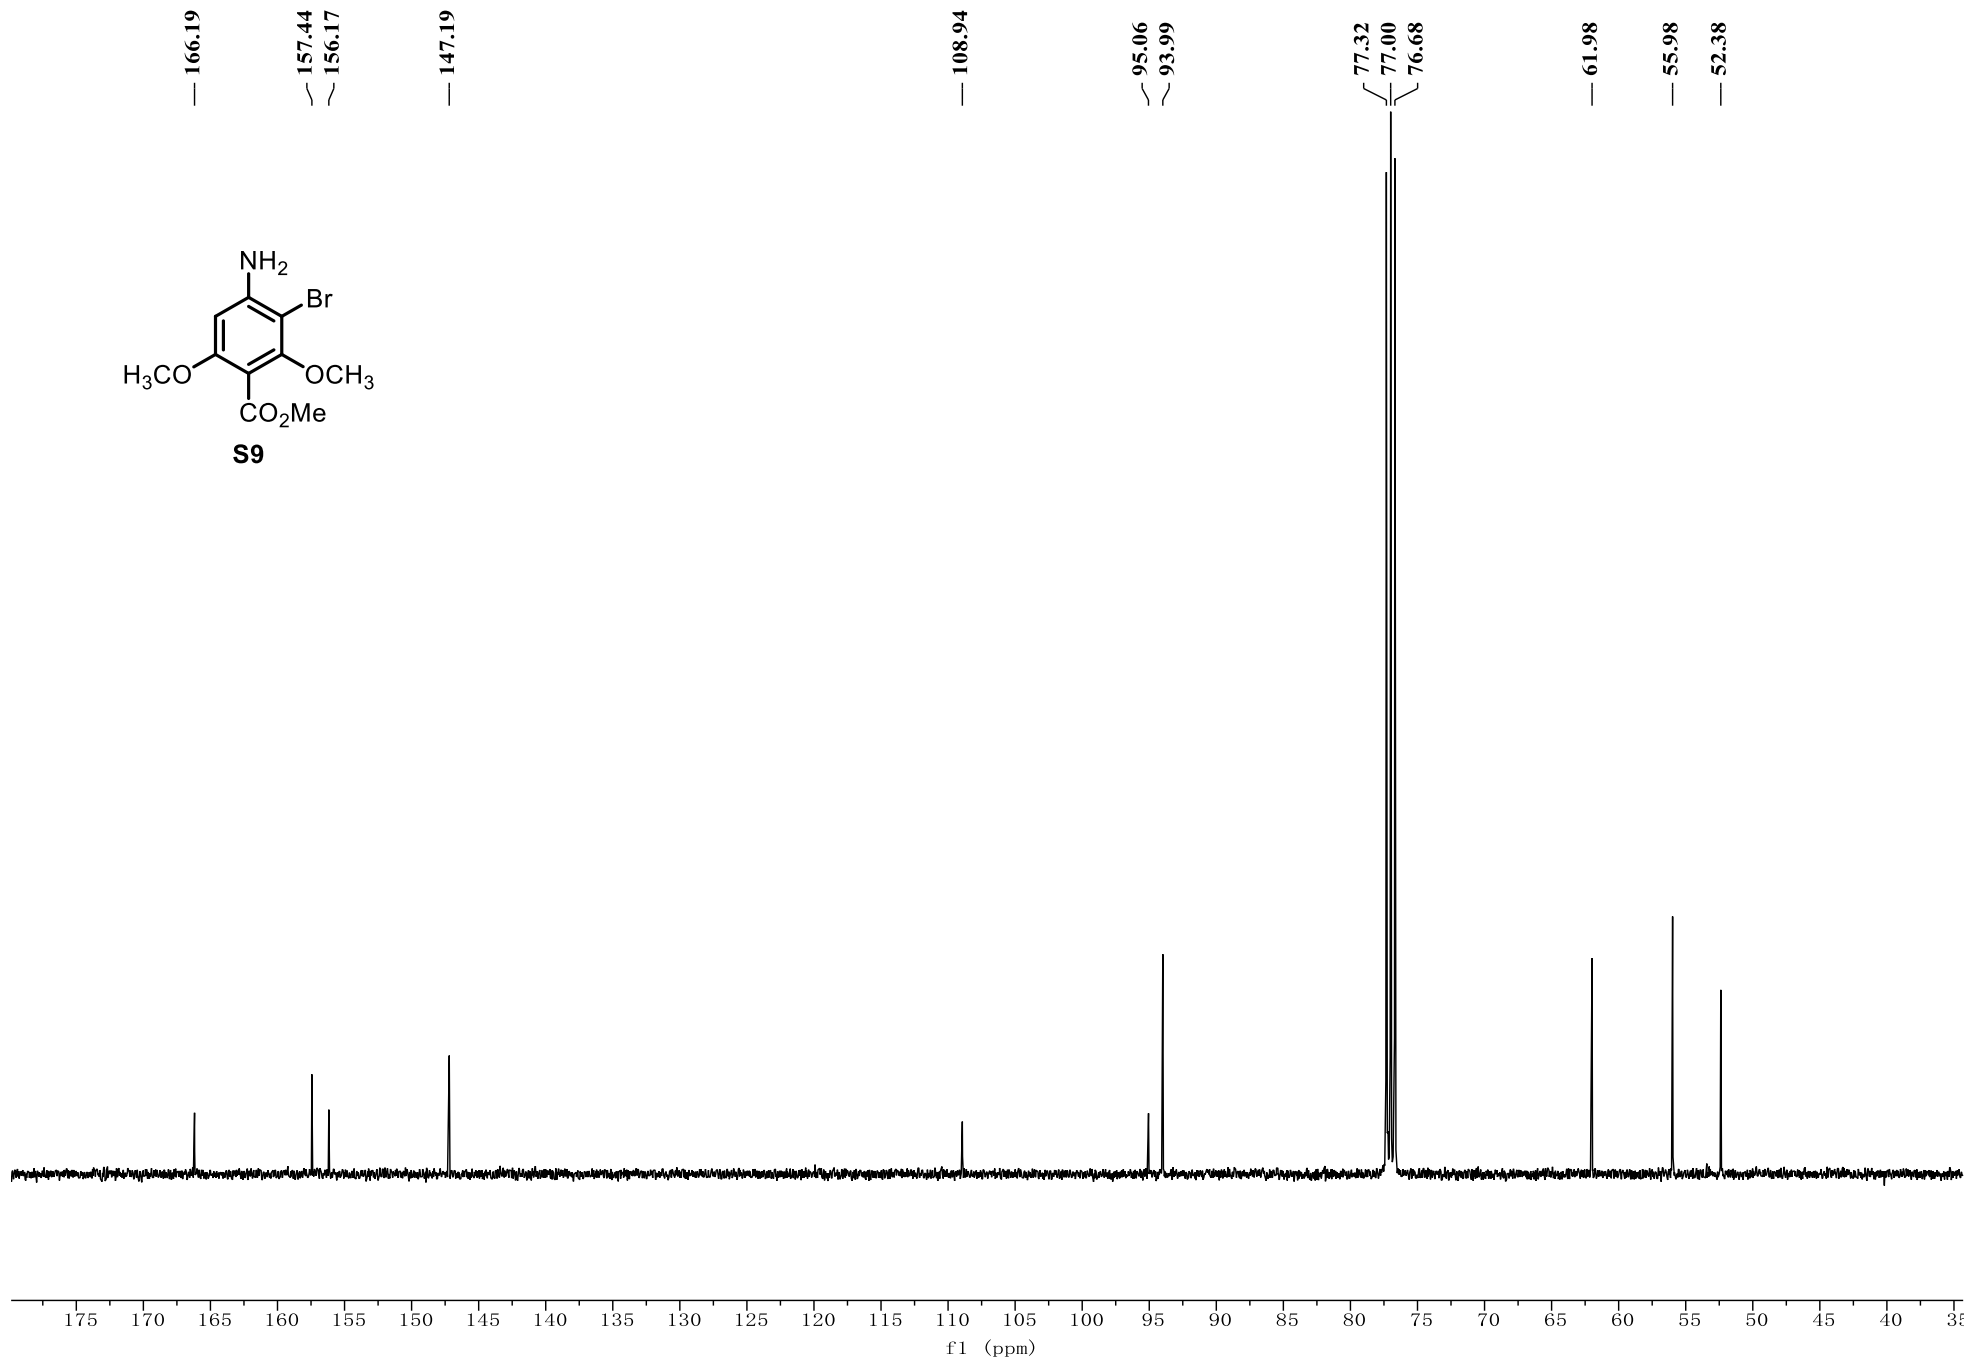

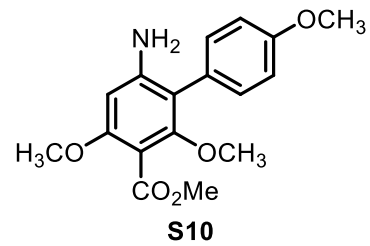

7.287  
 7.272  
 7.266  
 6.986  
 6.972

3.888  
 3.848  
 3.800

3.337

0.000

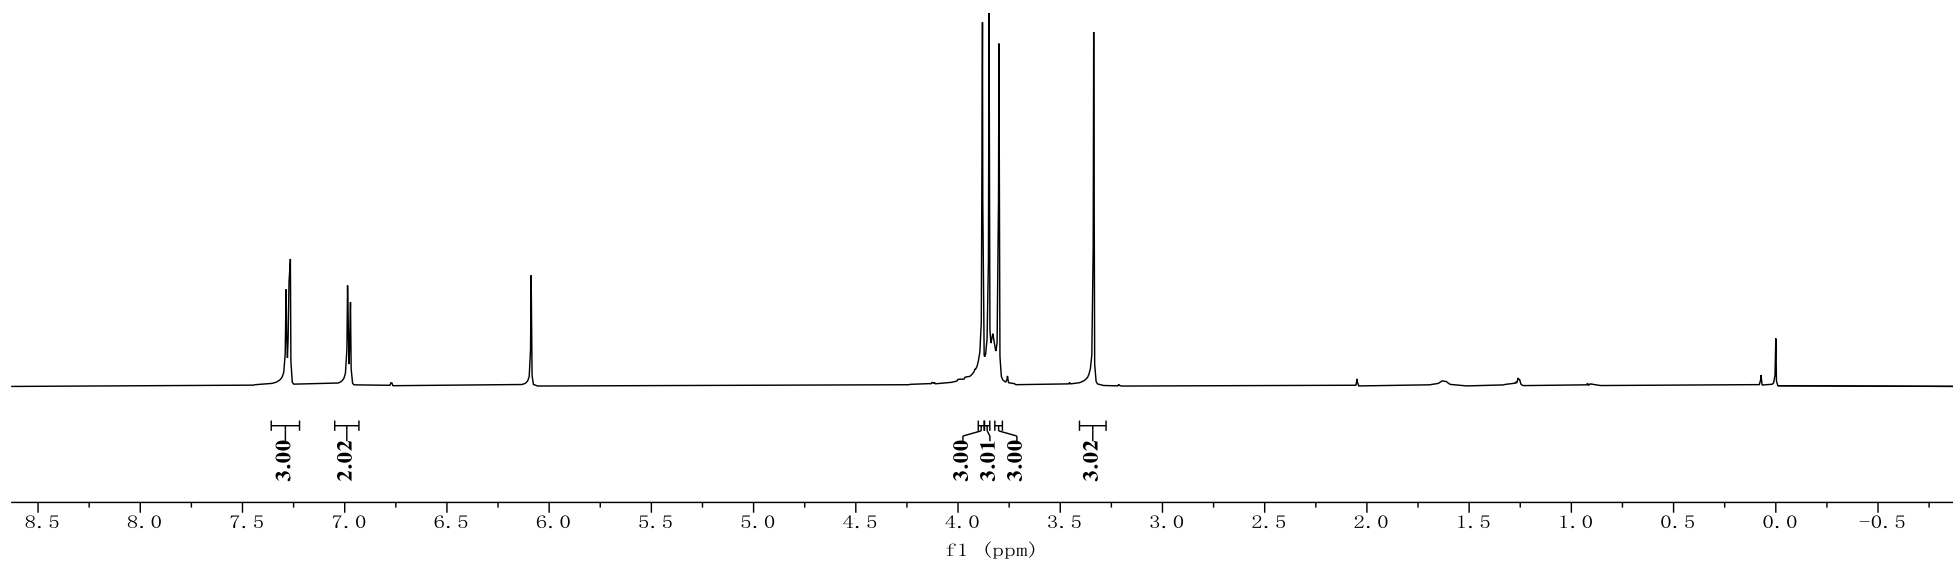

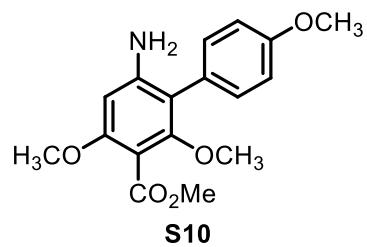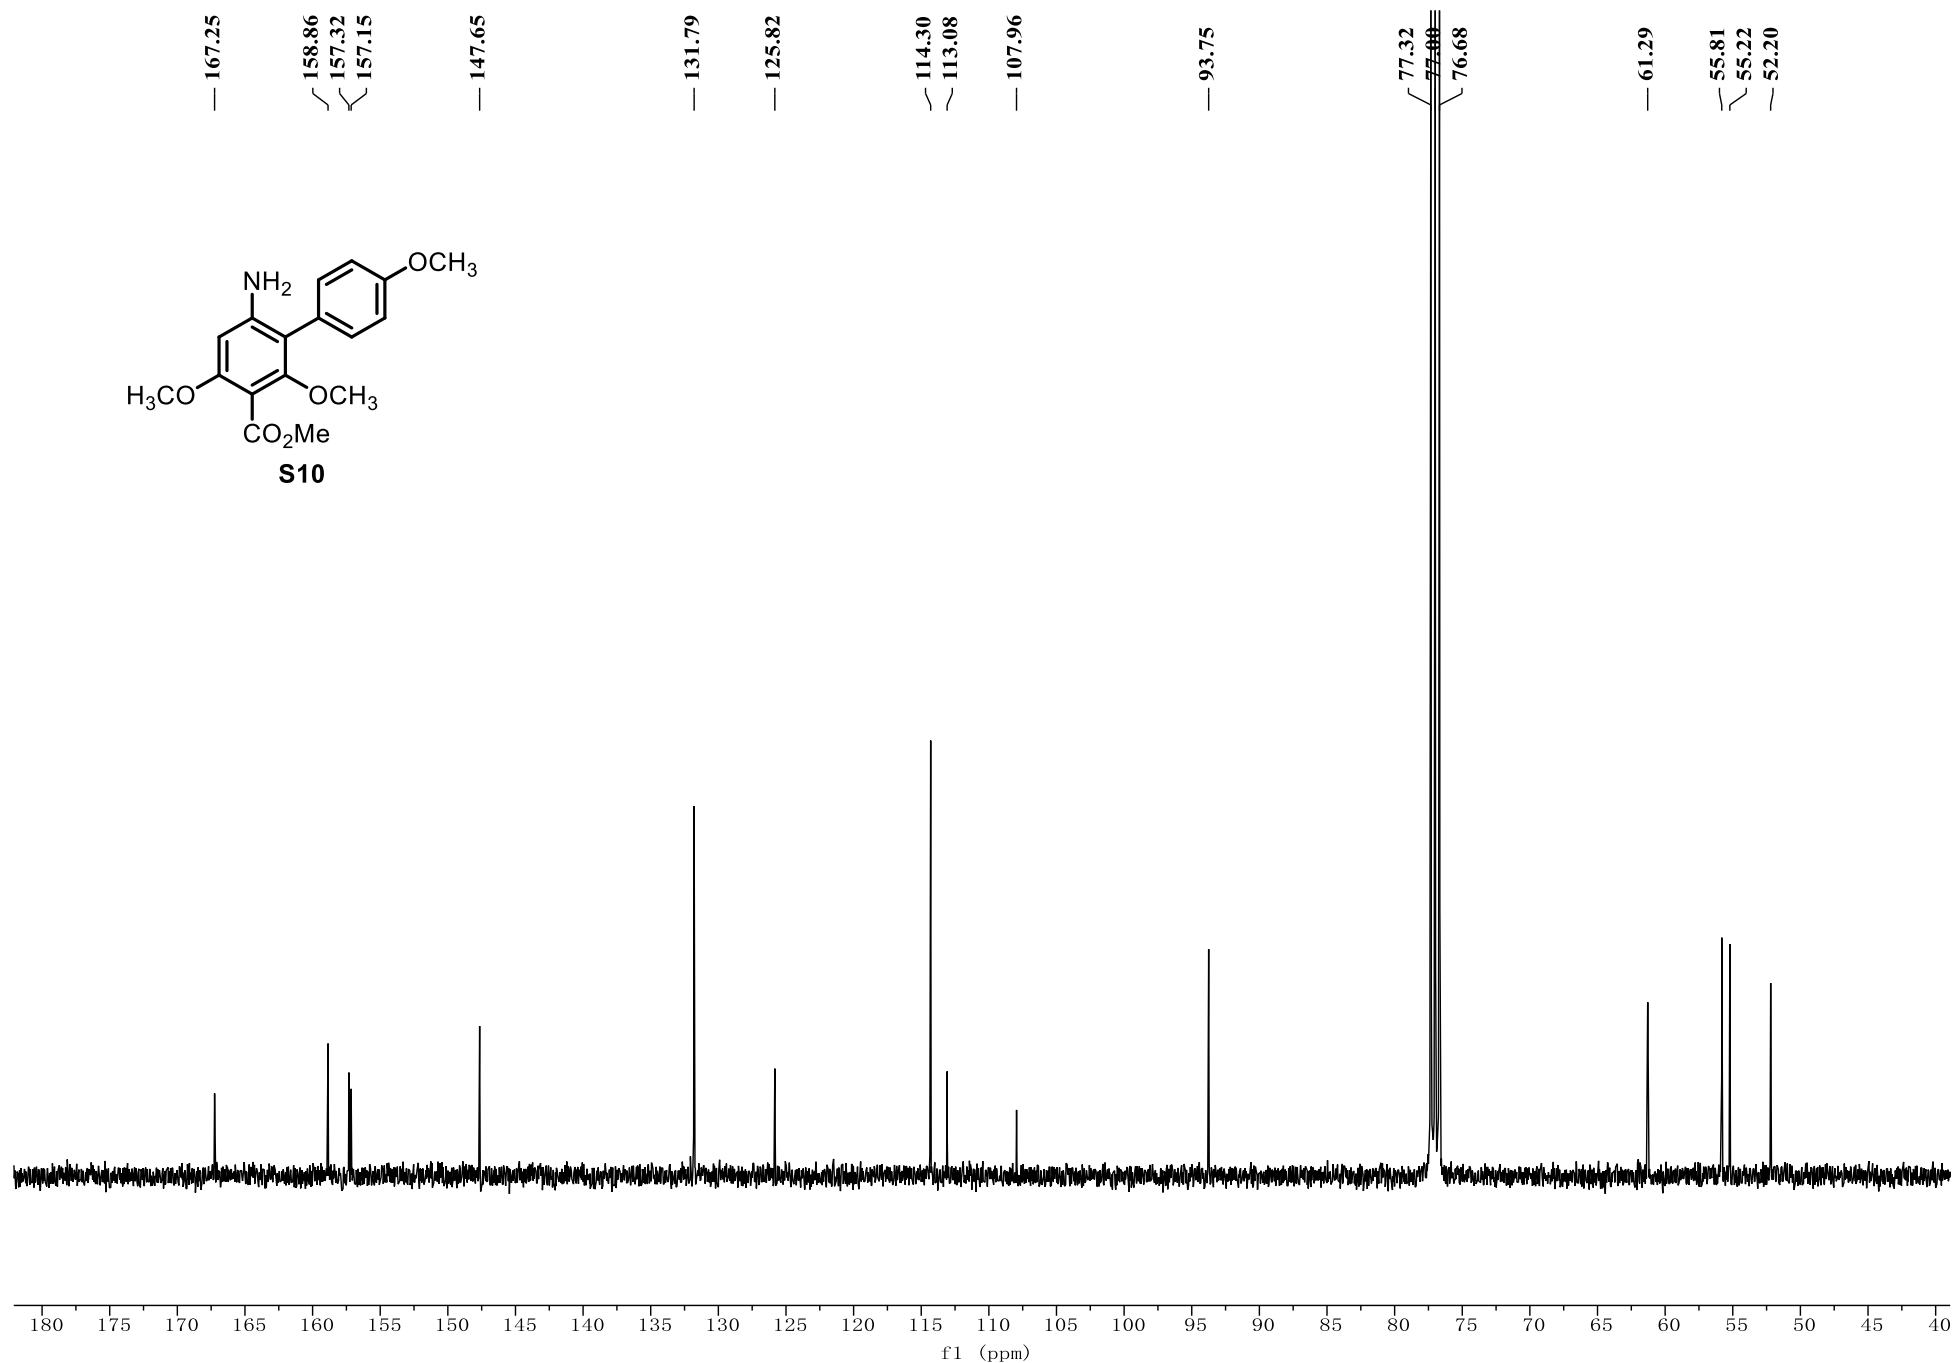

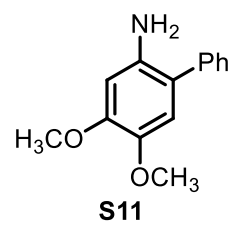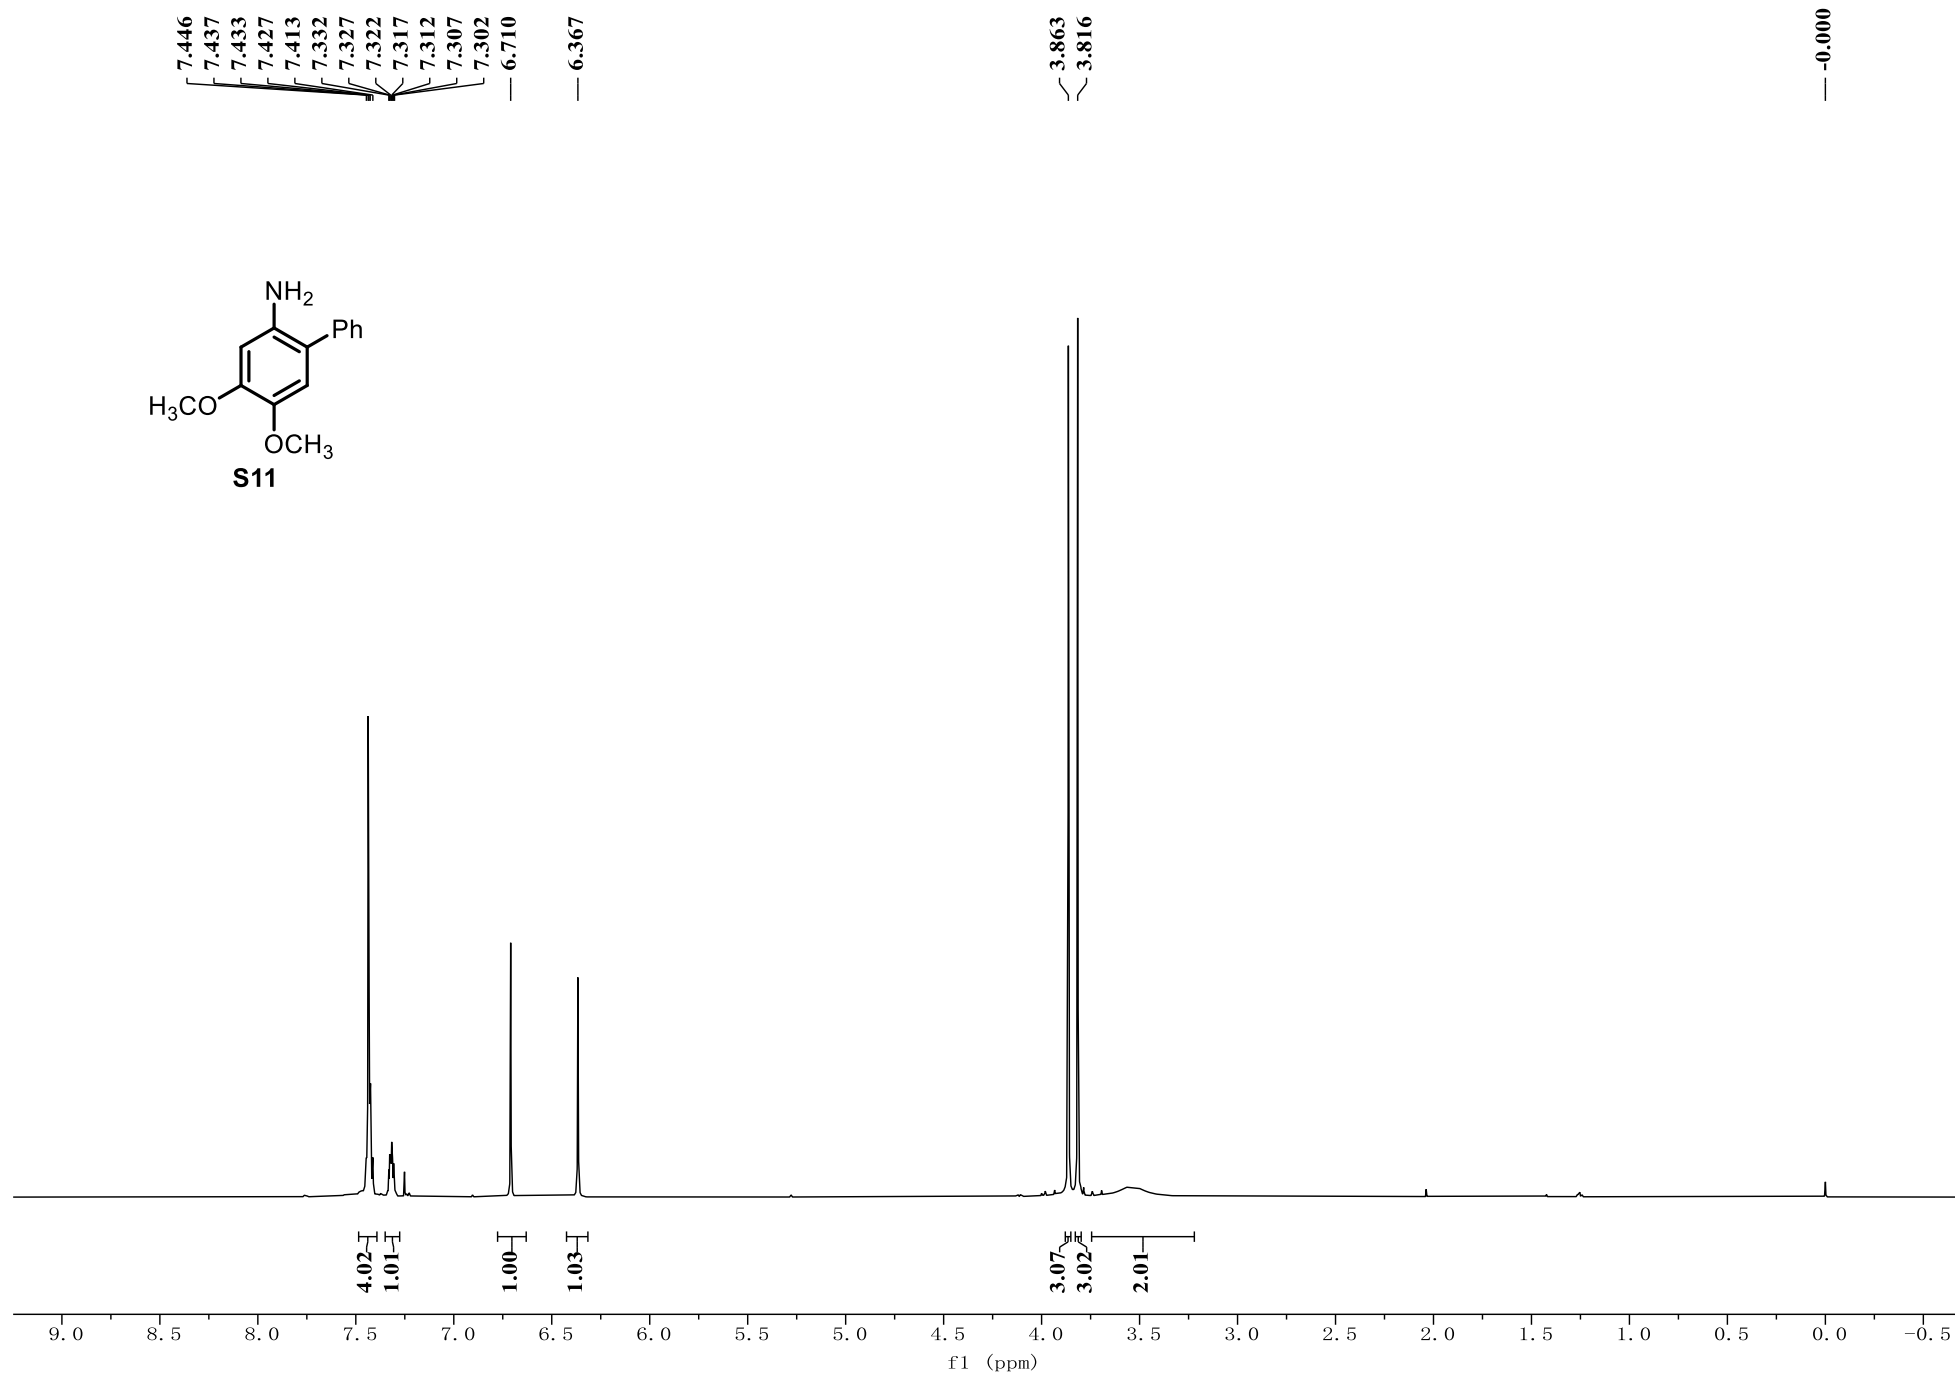

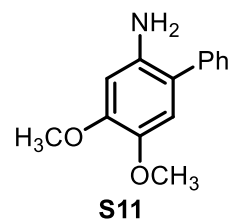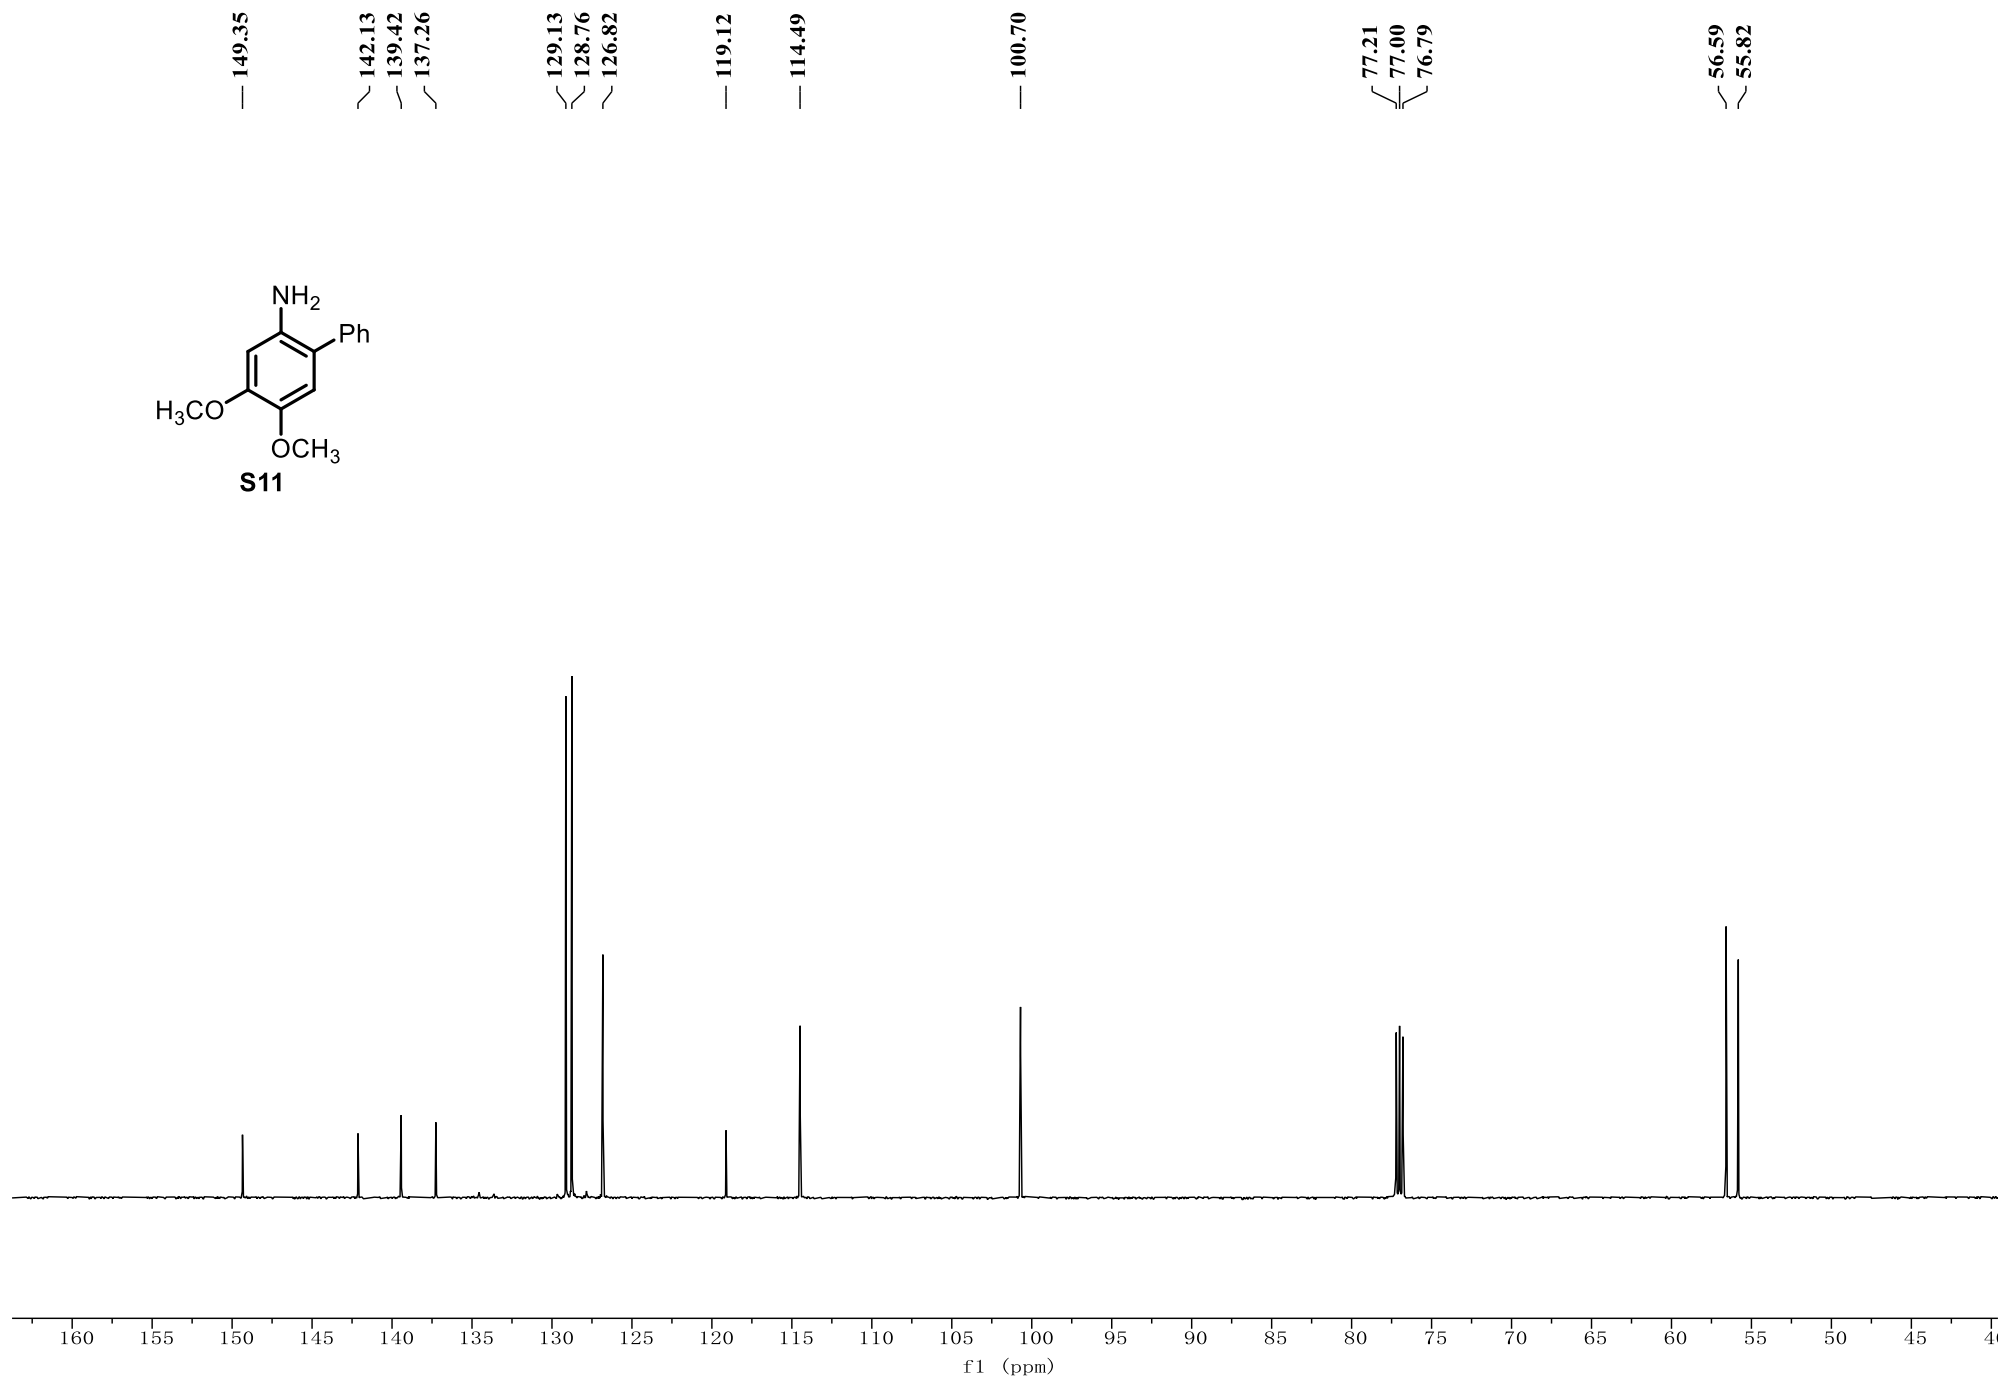

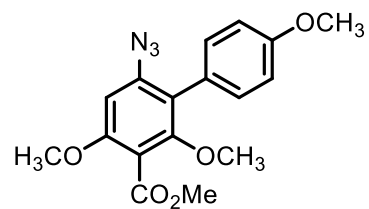

**S12**

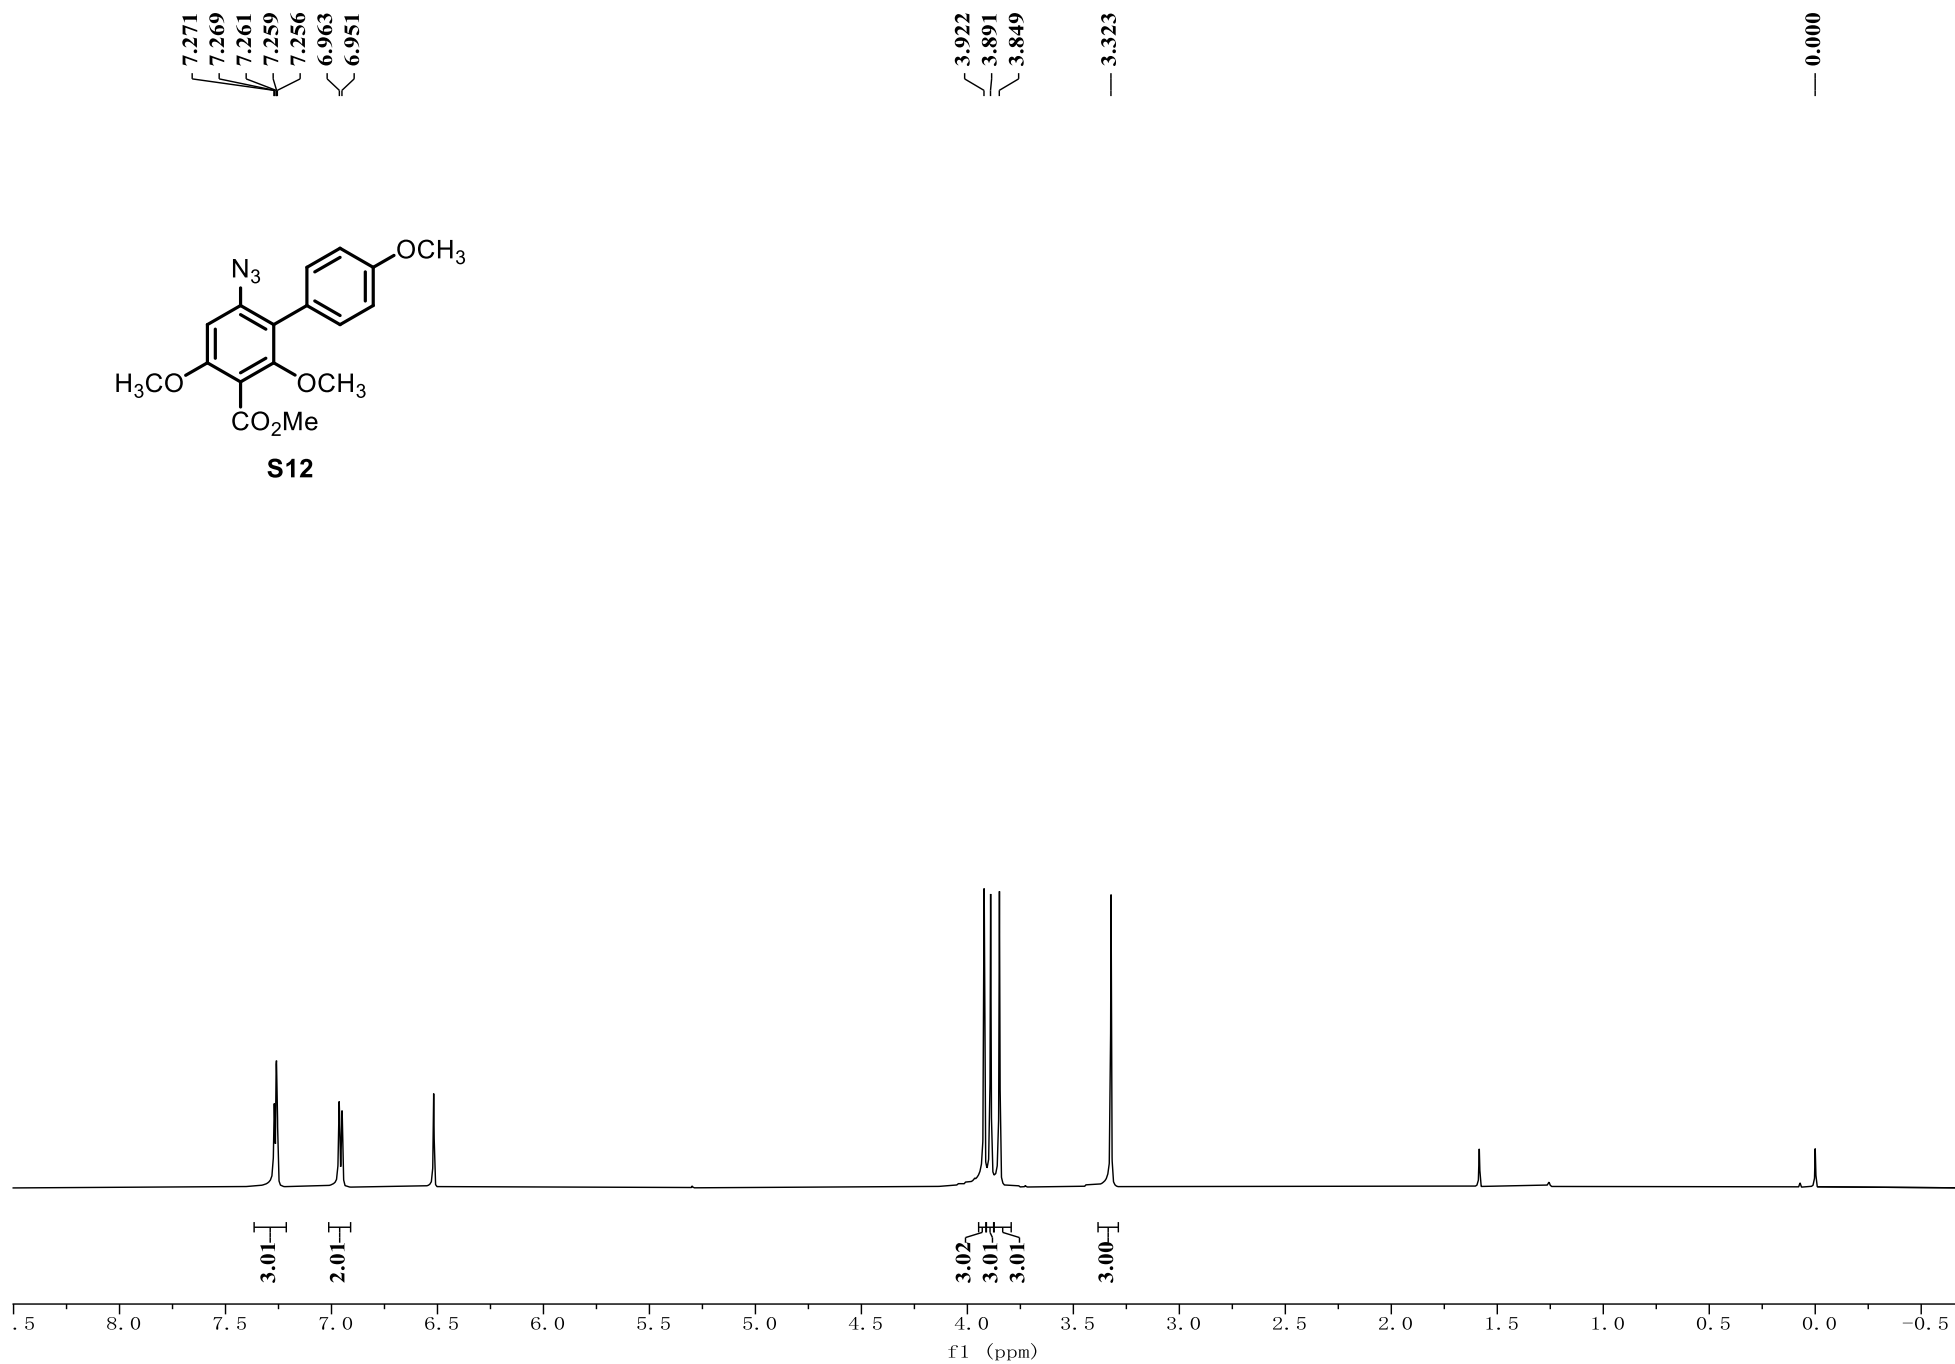

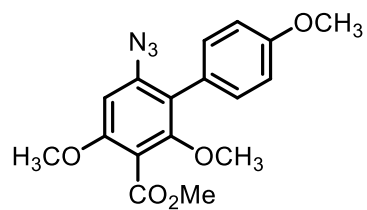

**S12**

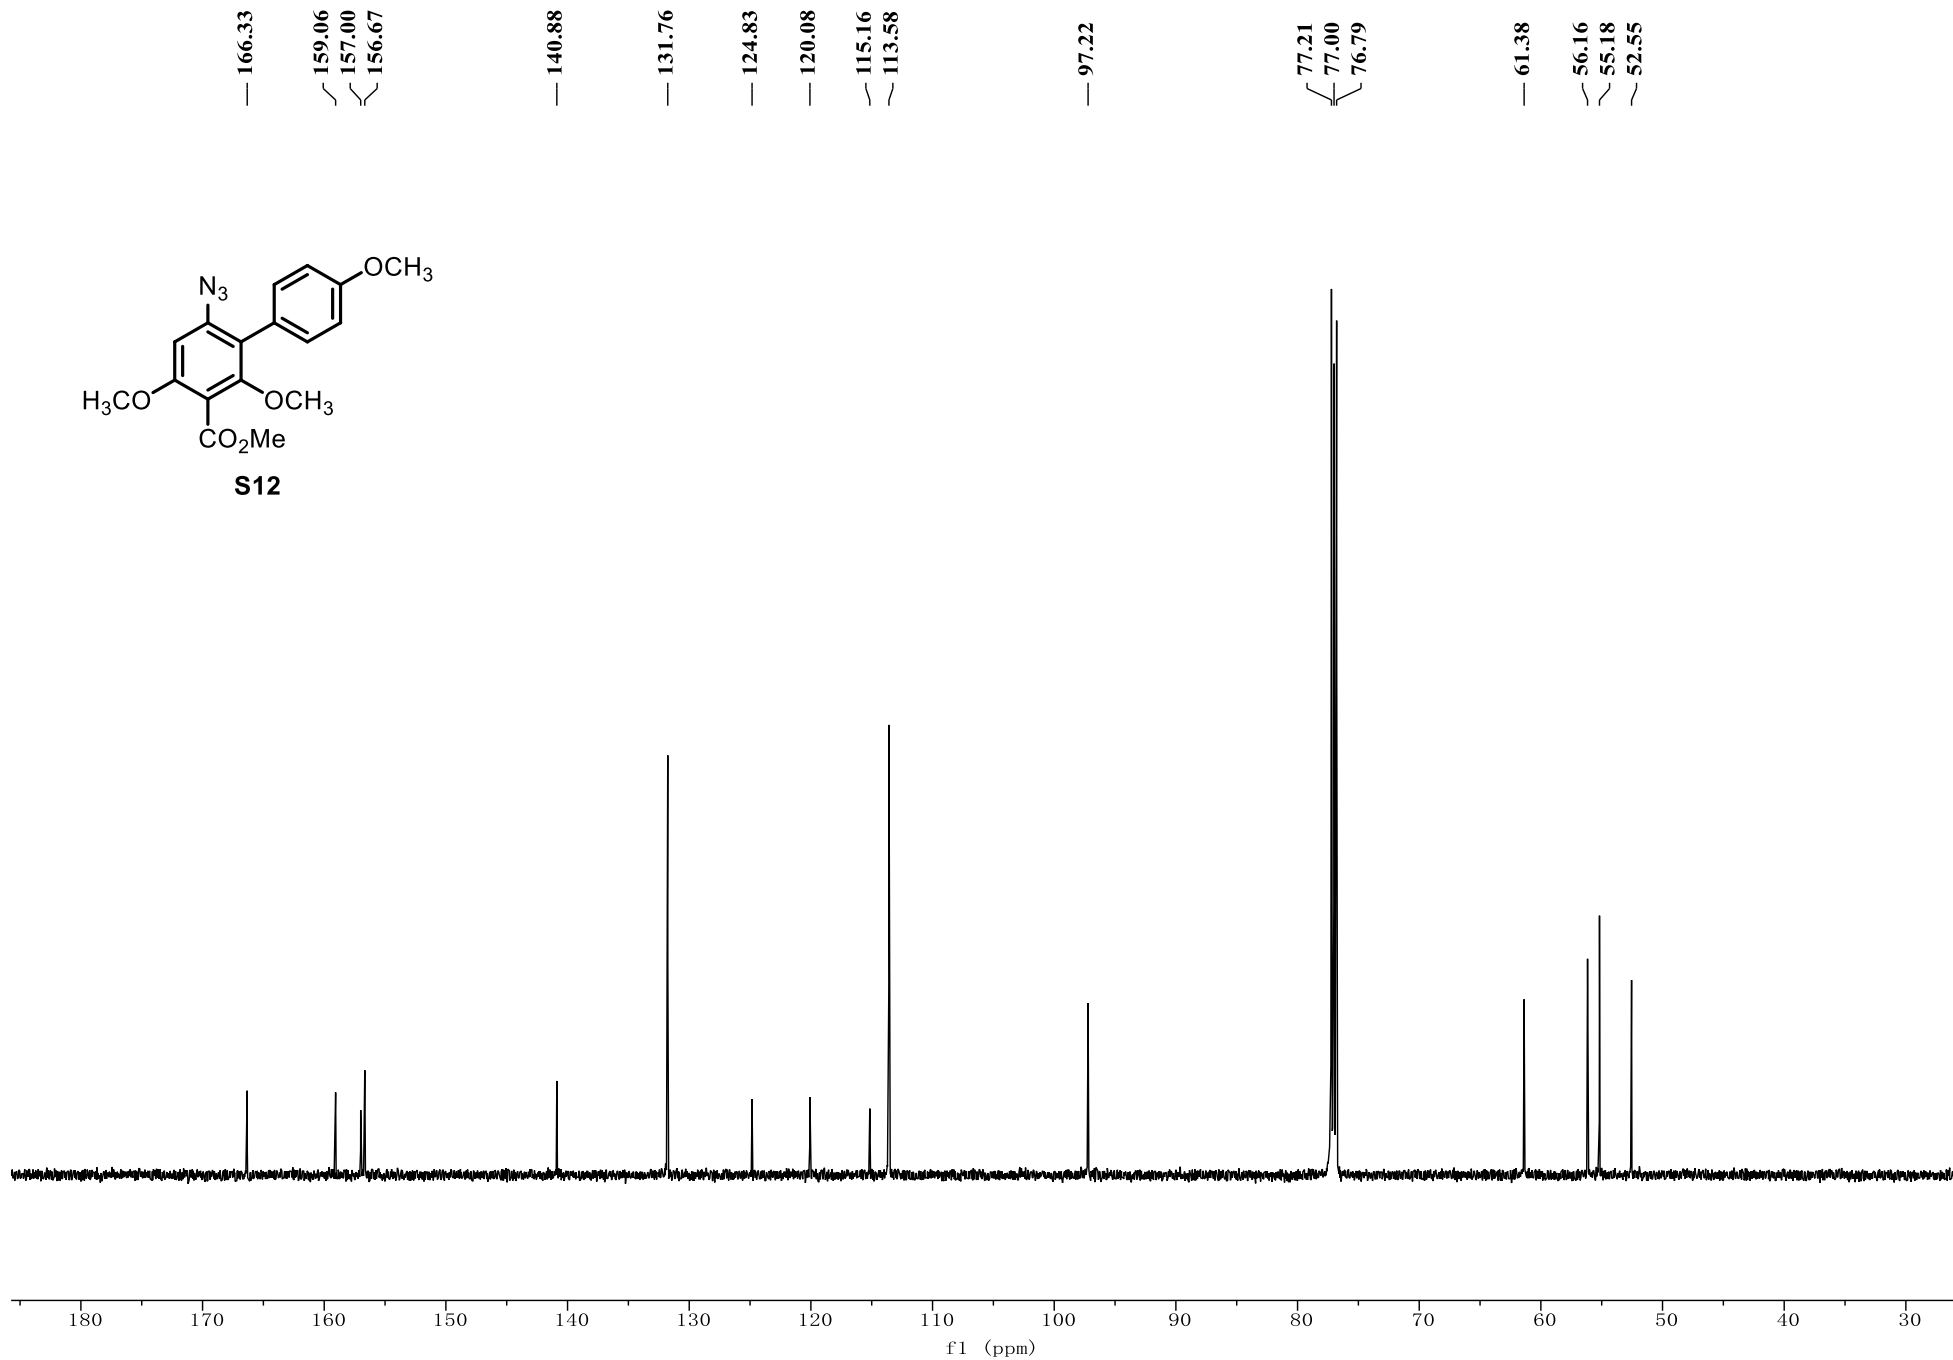

7.438  
7.428  
7.424  
7.419  
7.404  
7.360  
7.356  
7.350  
7.345  
7.342  
7.335  
— 6.839  
— 6.731

~ 3.951  
~ 3.881

— -0.000

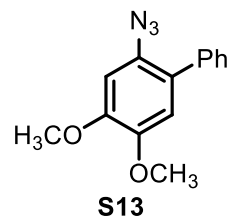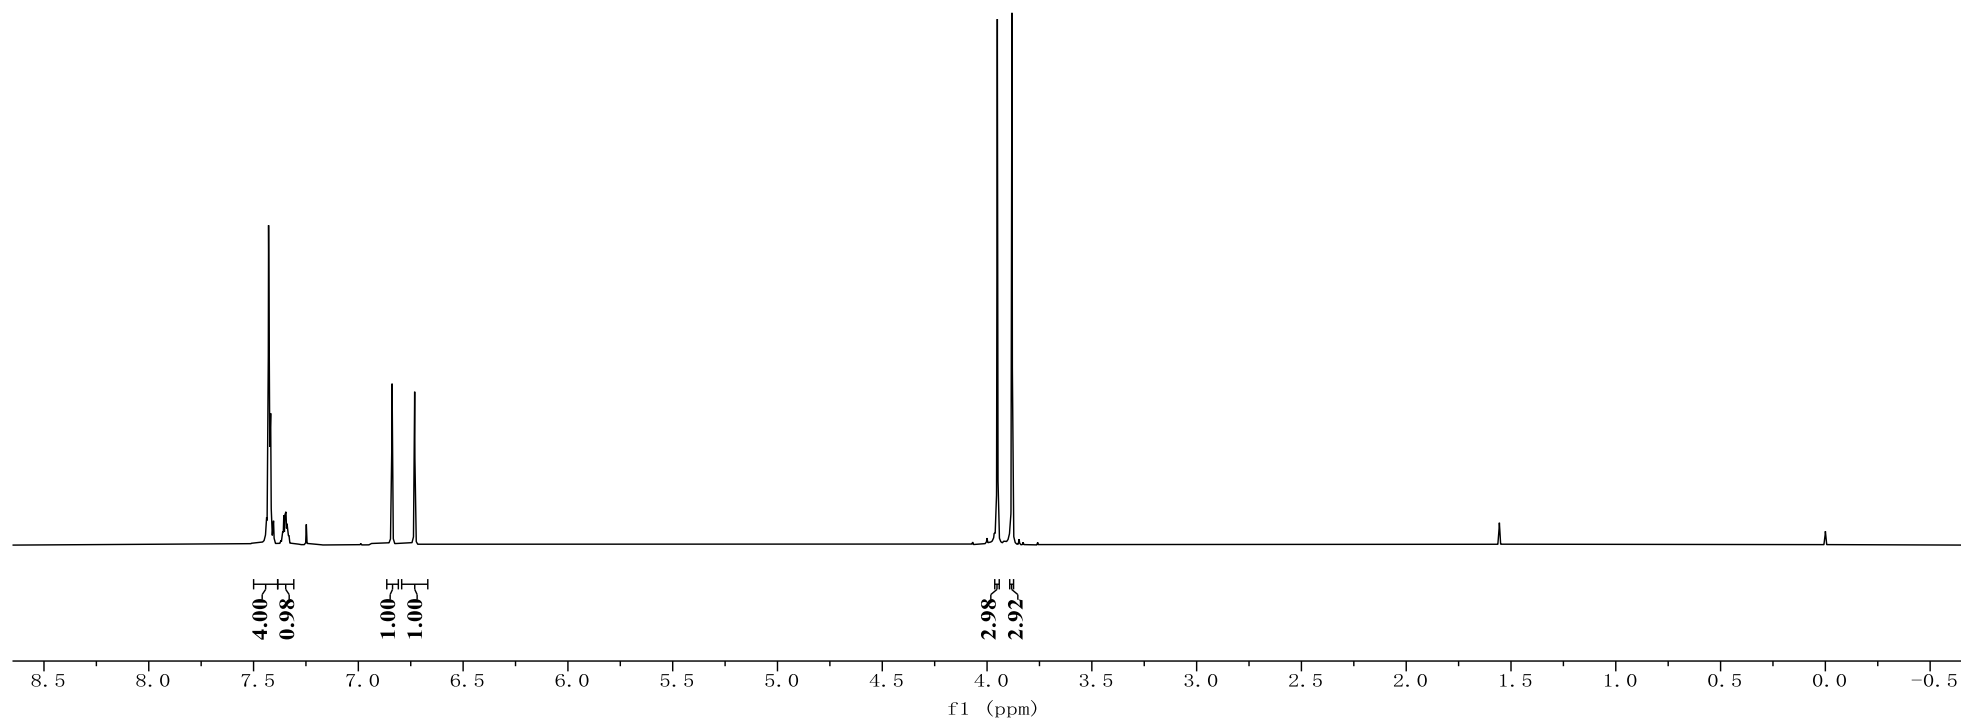

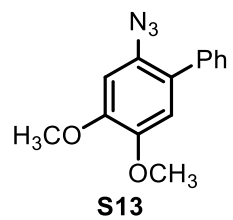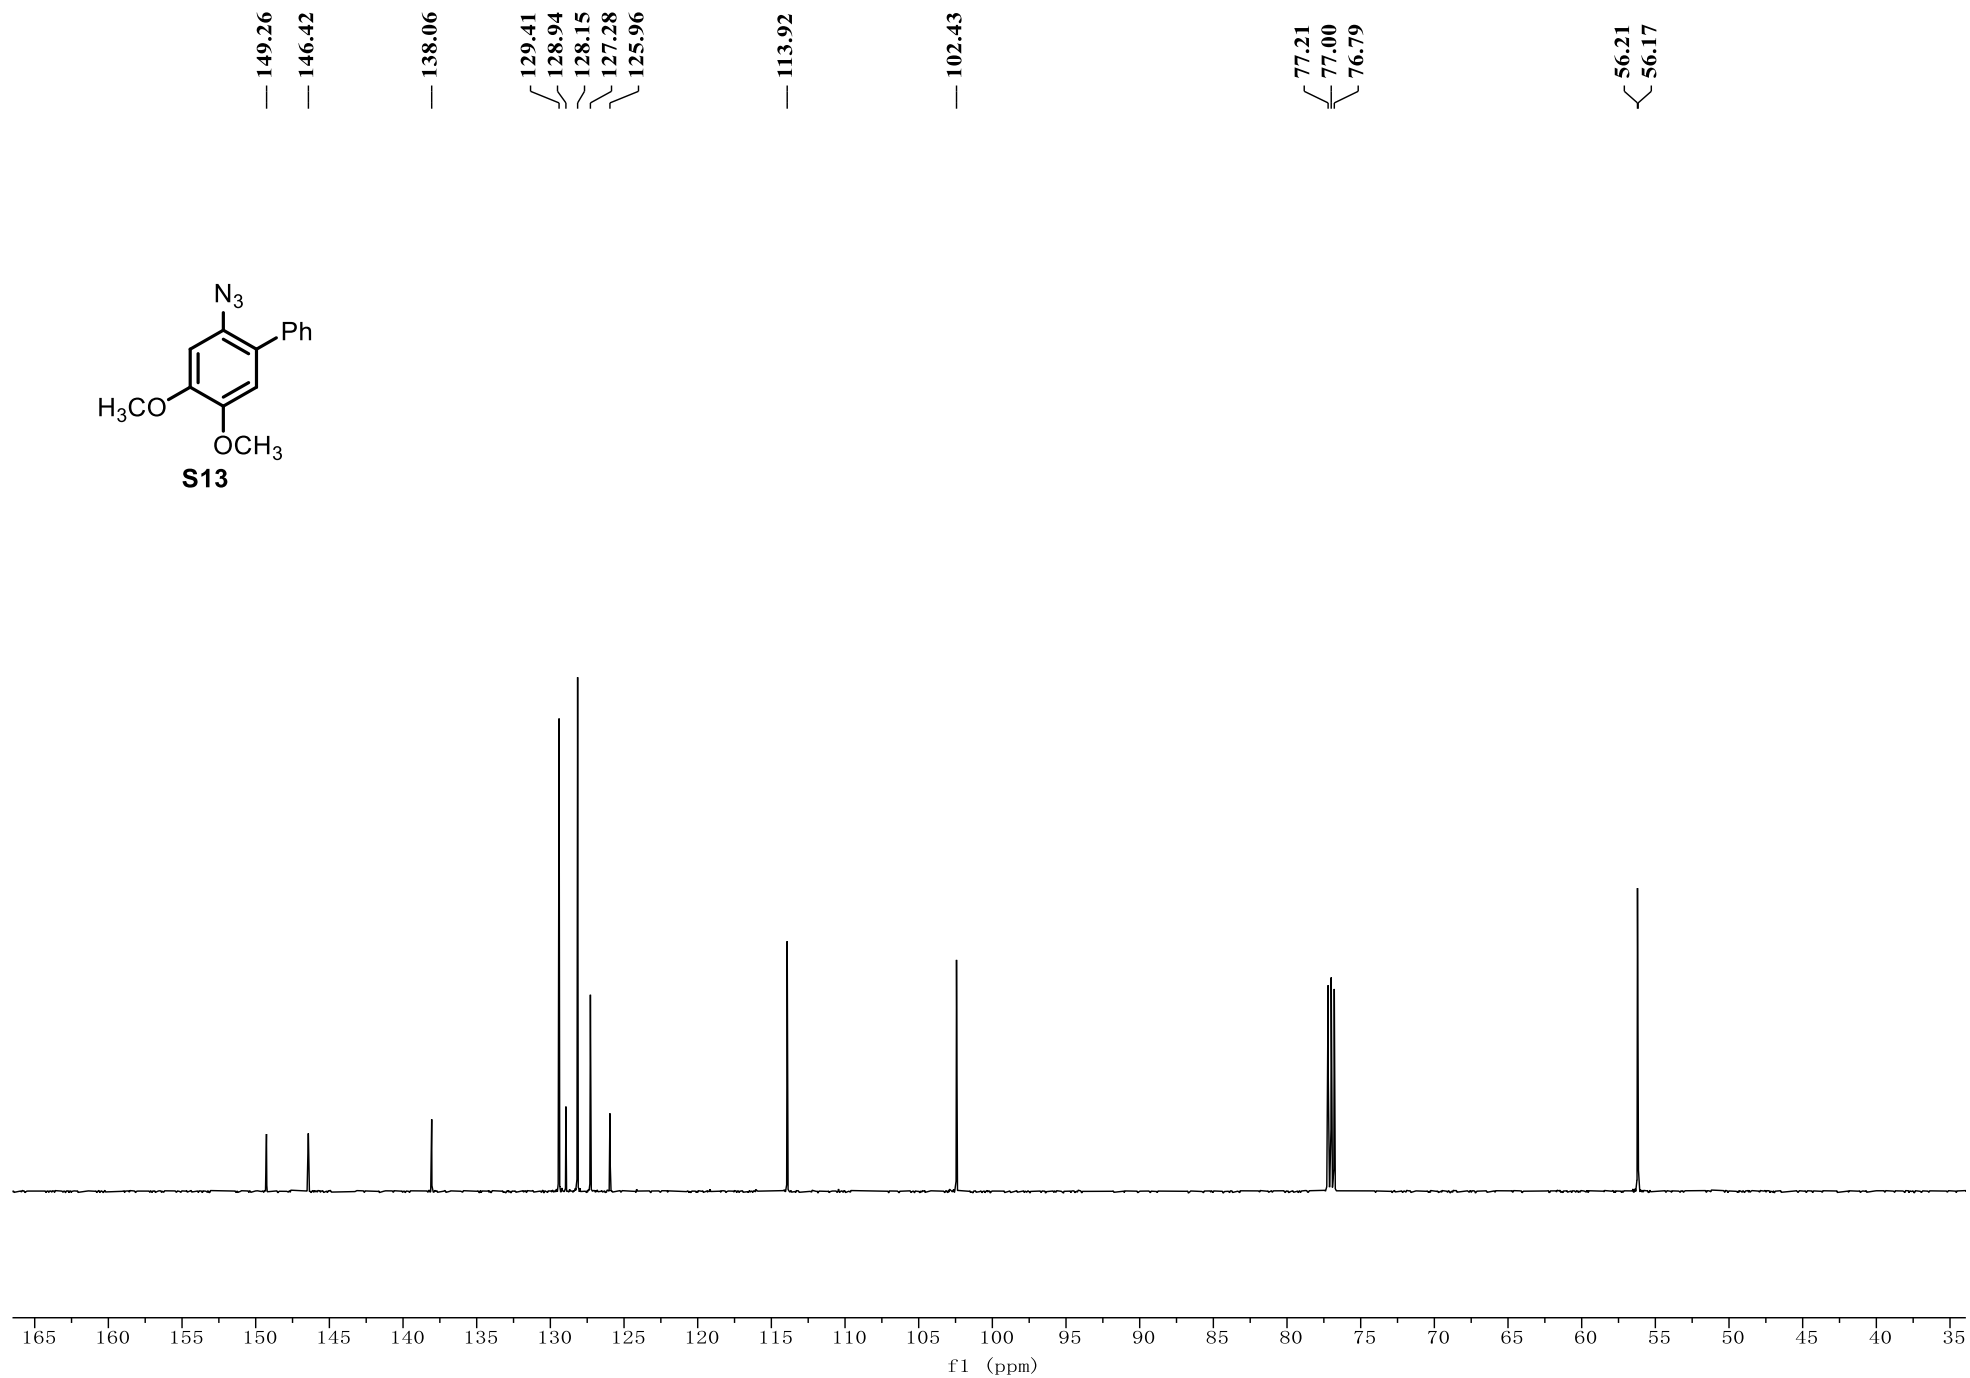

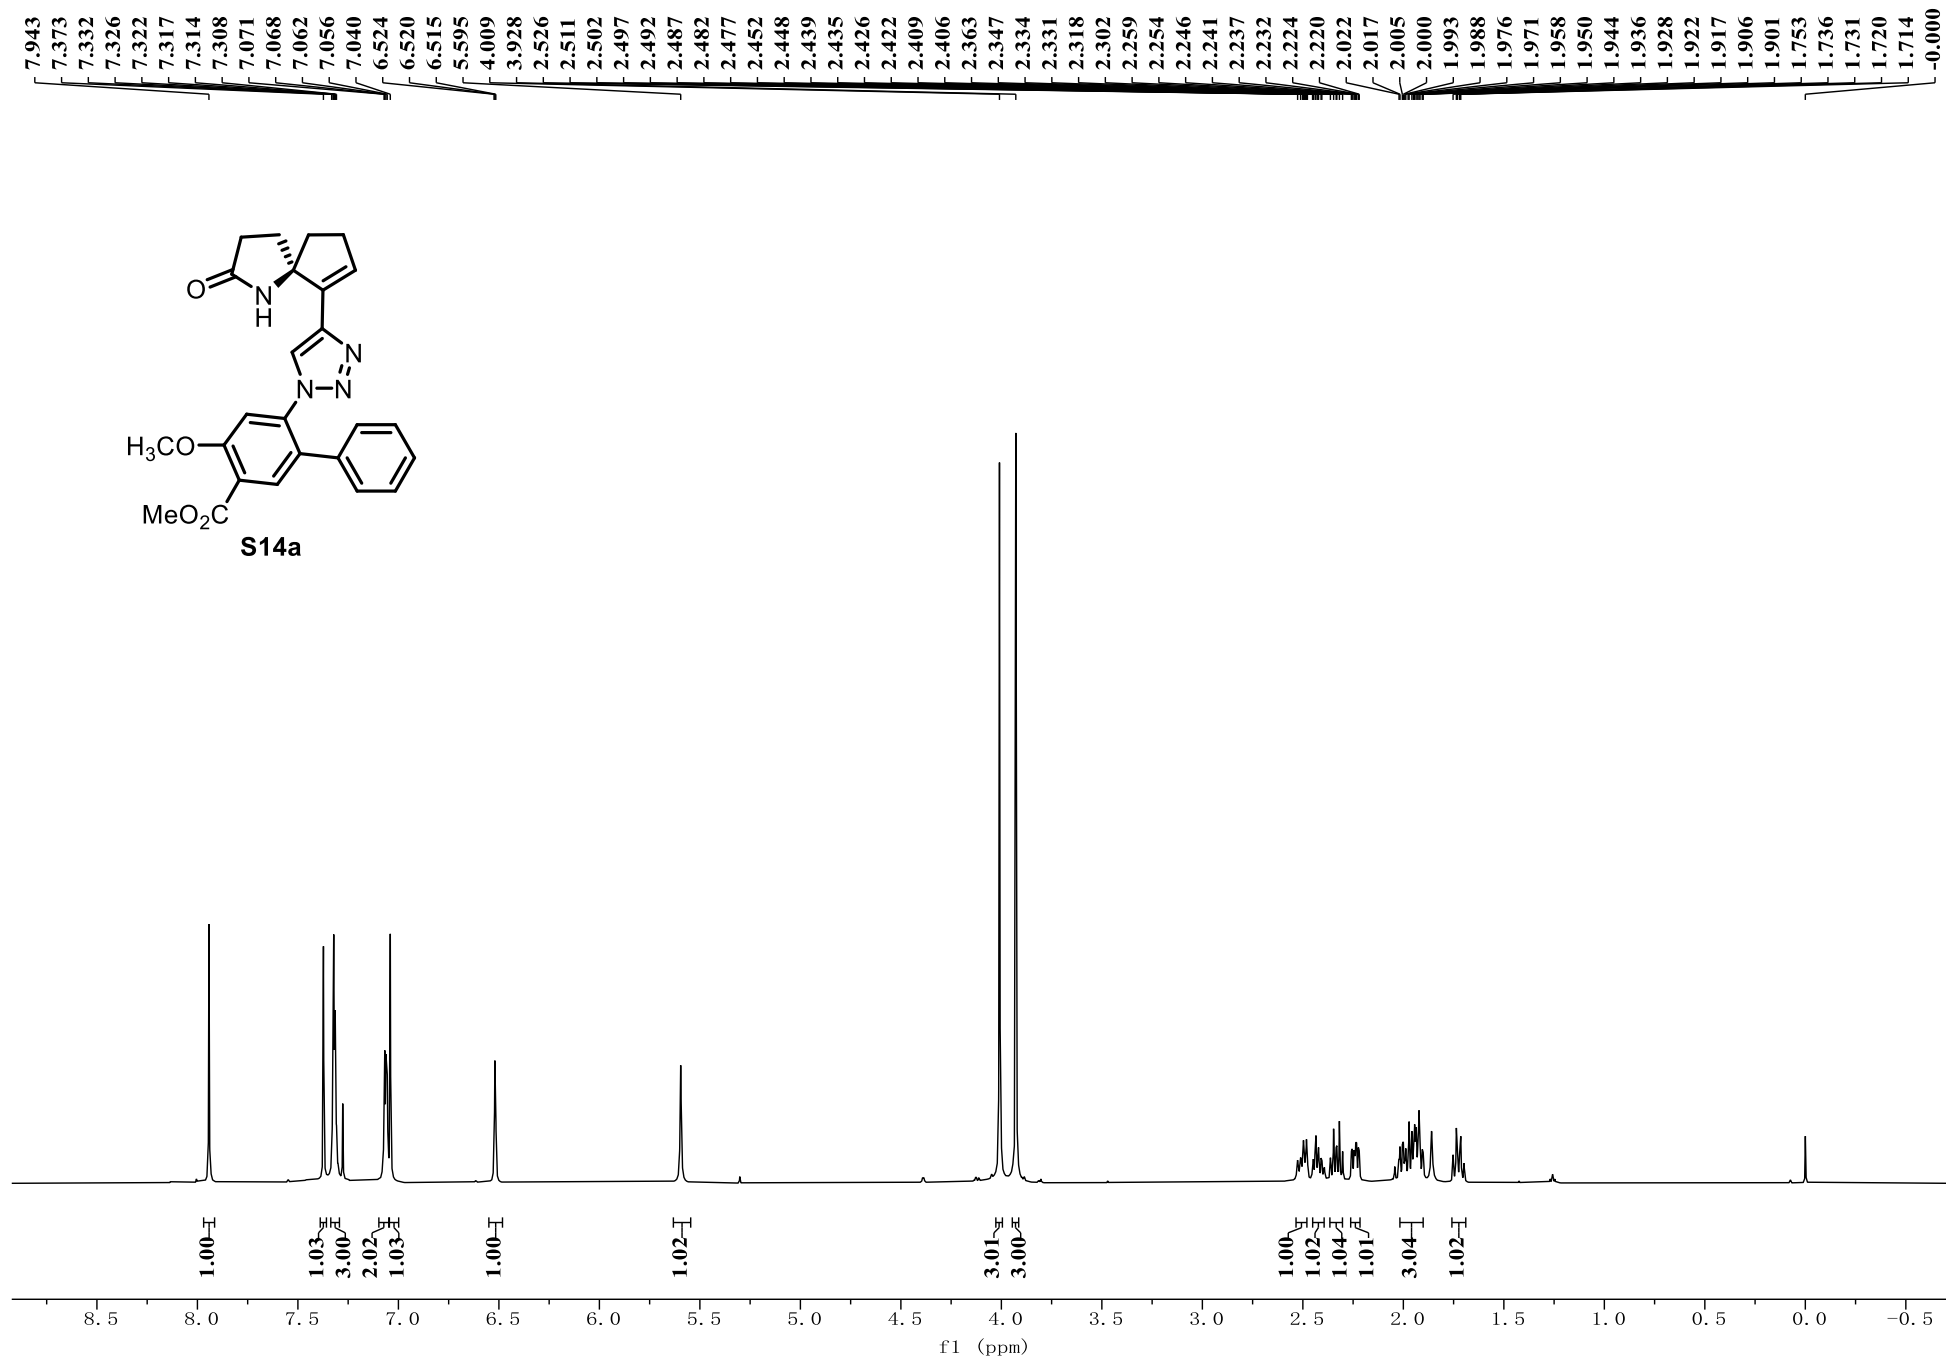

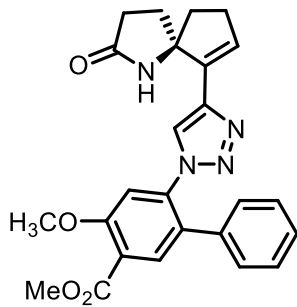

**S14a**

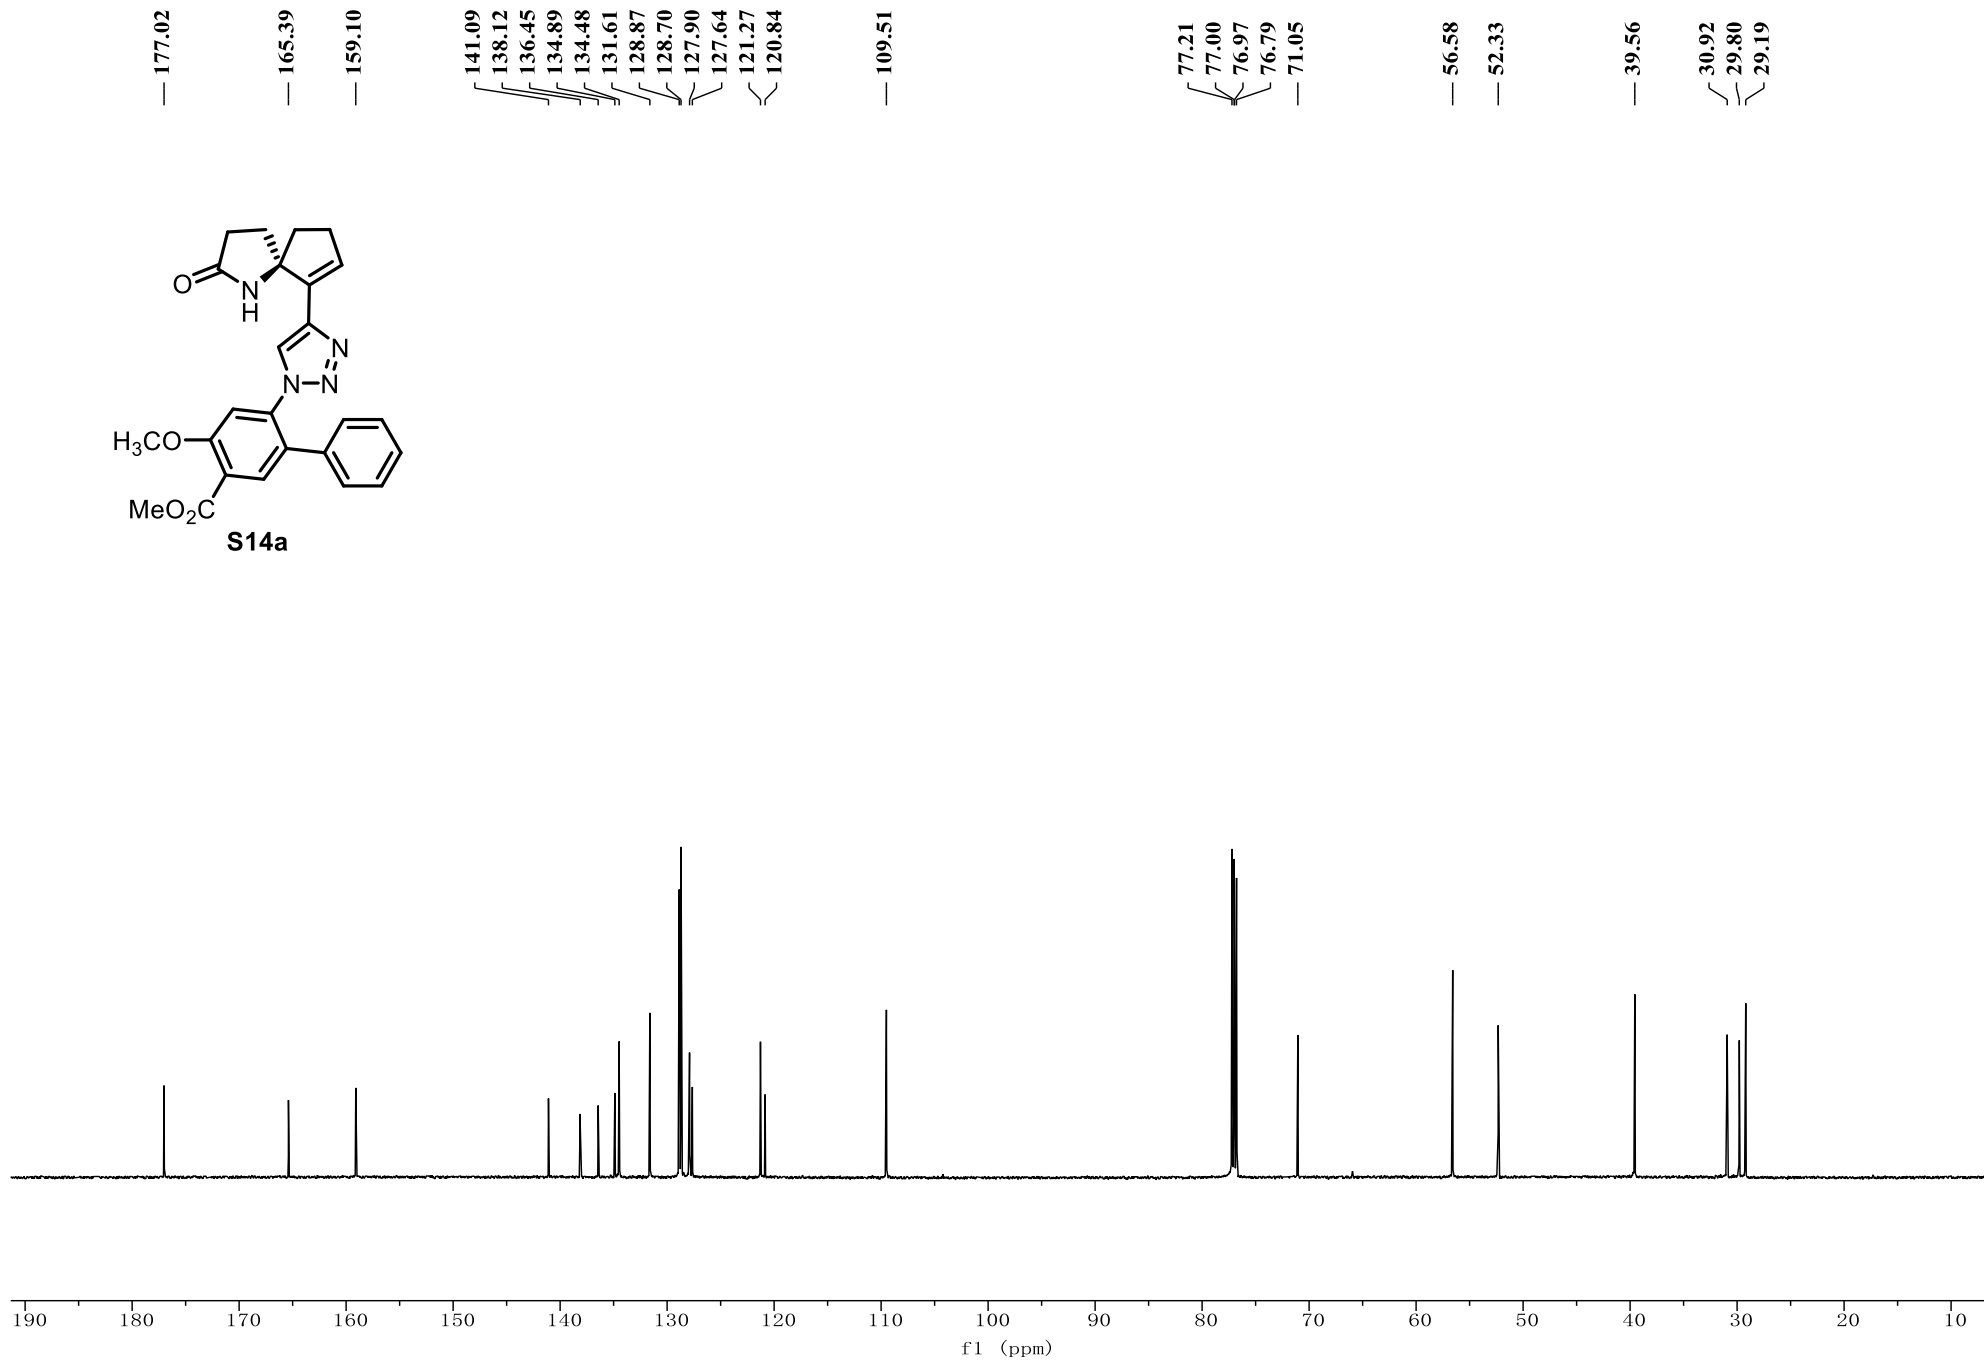

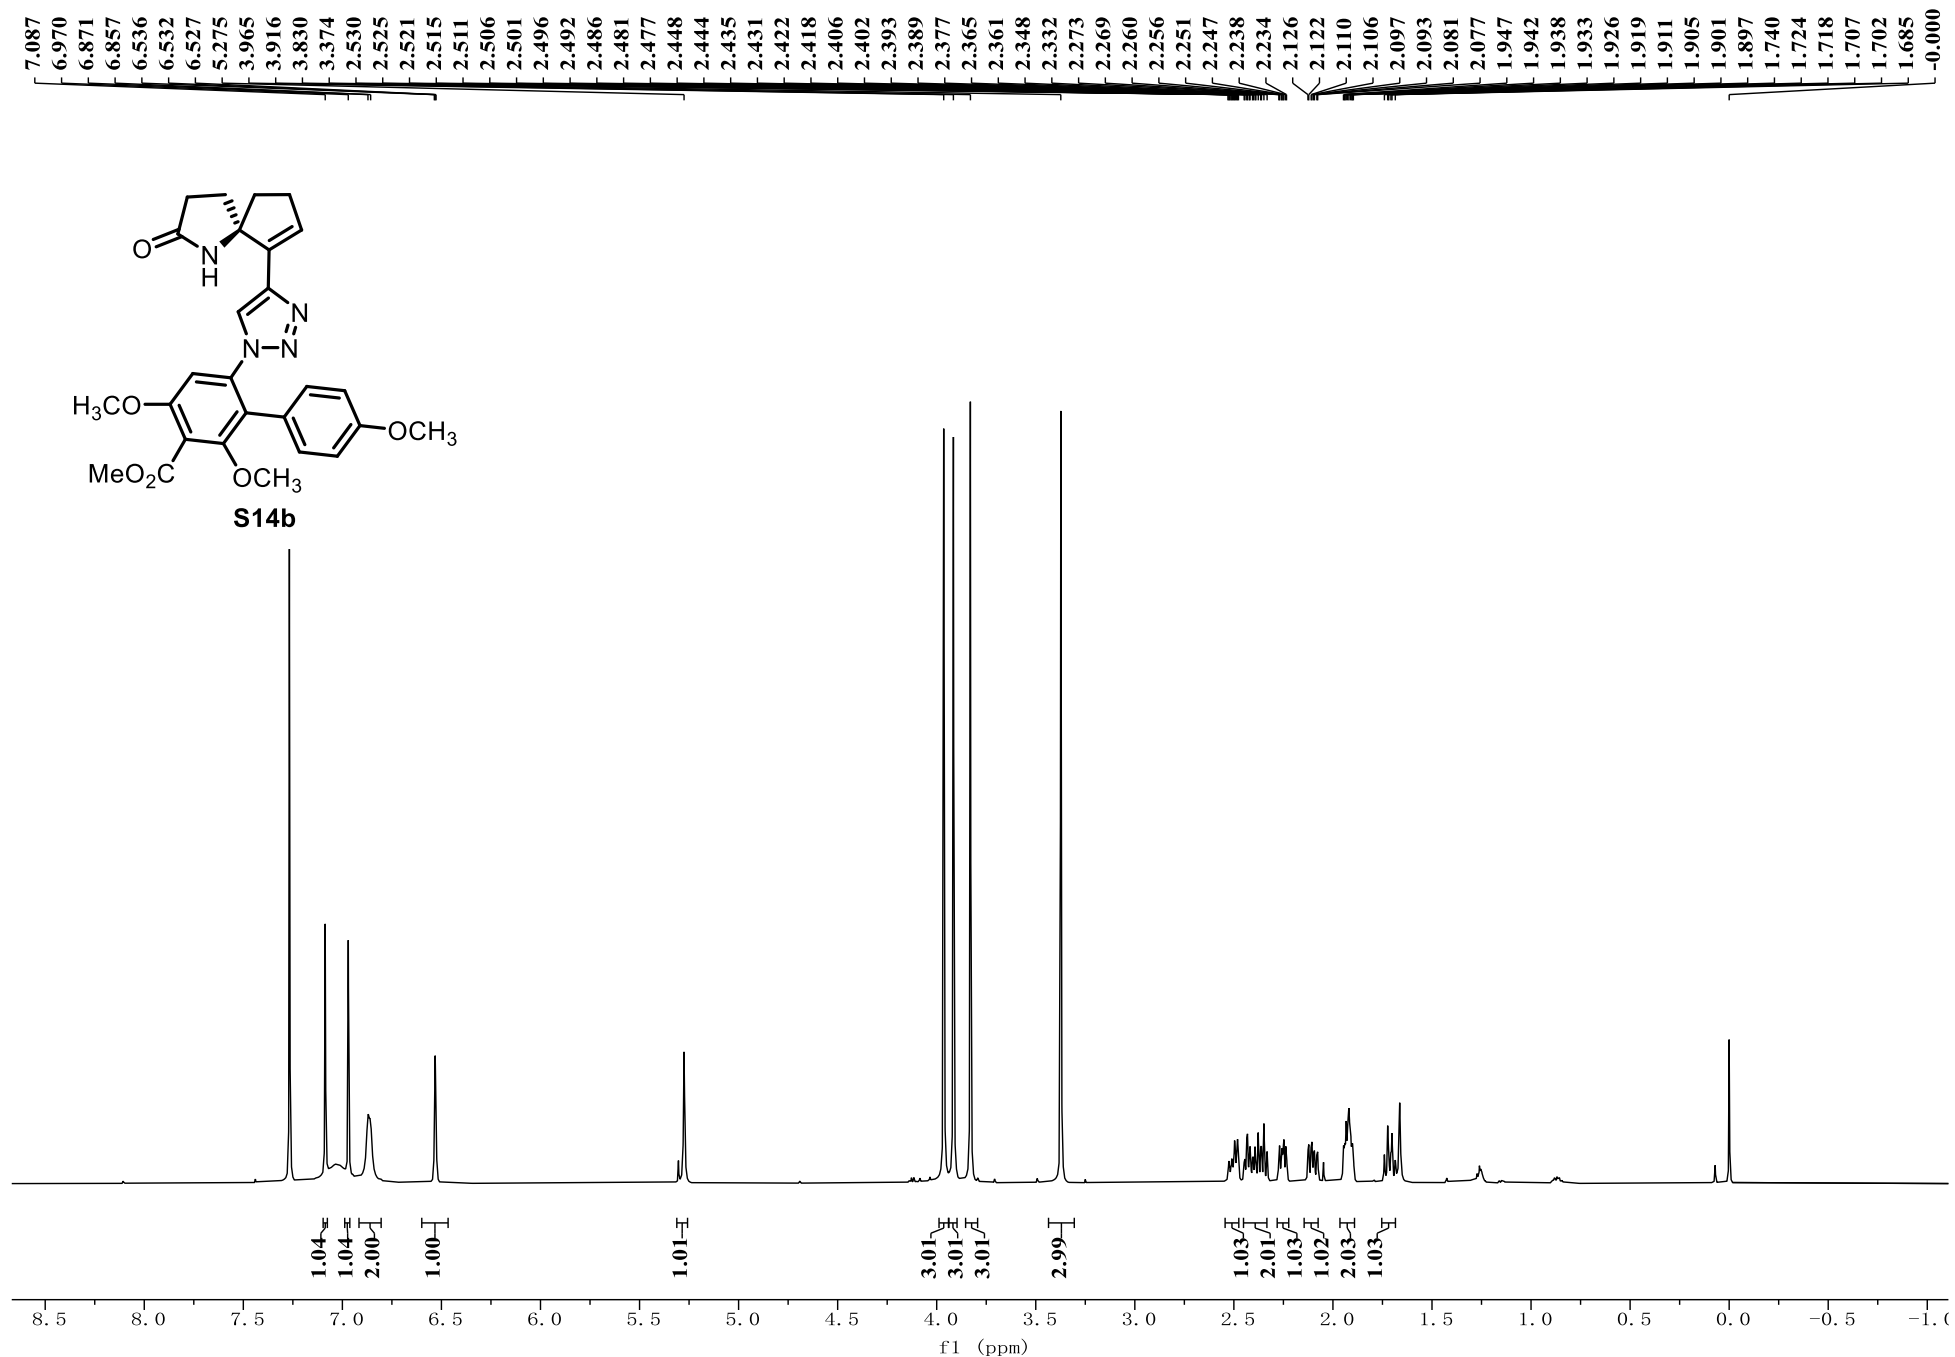

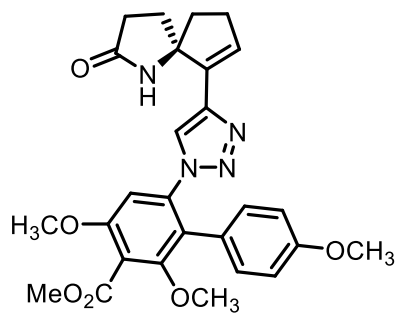

**S14b**

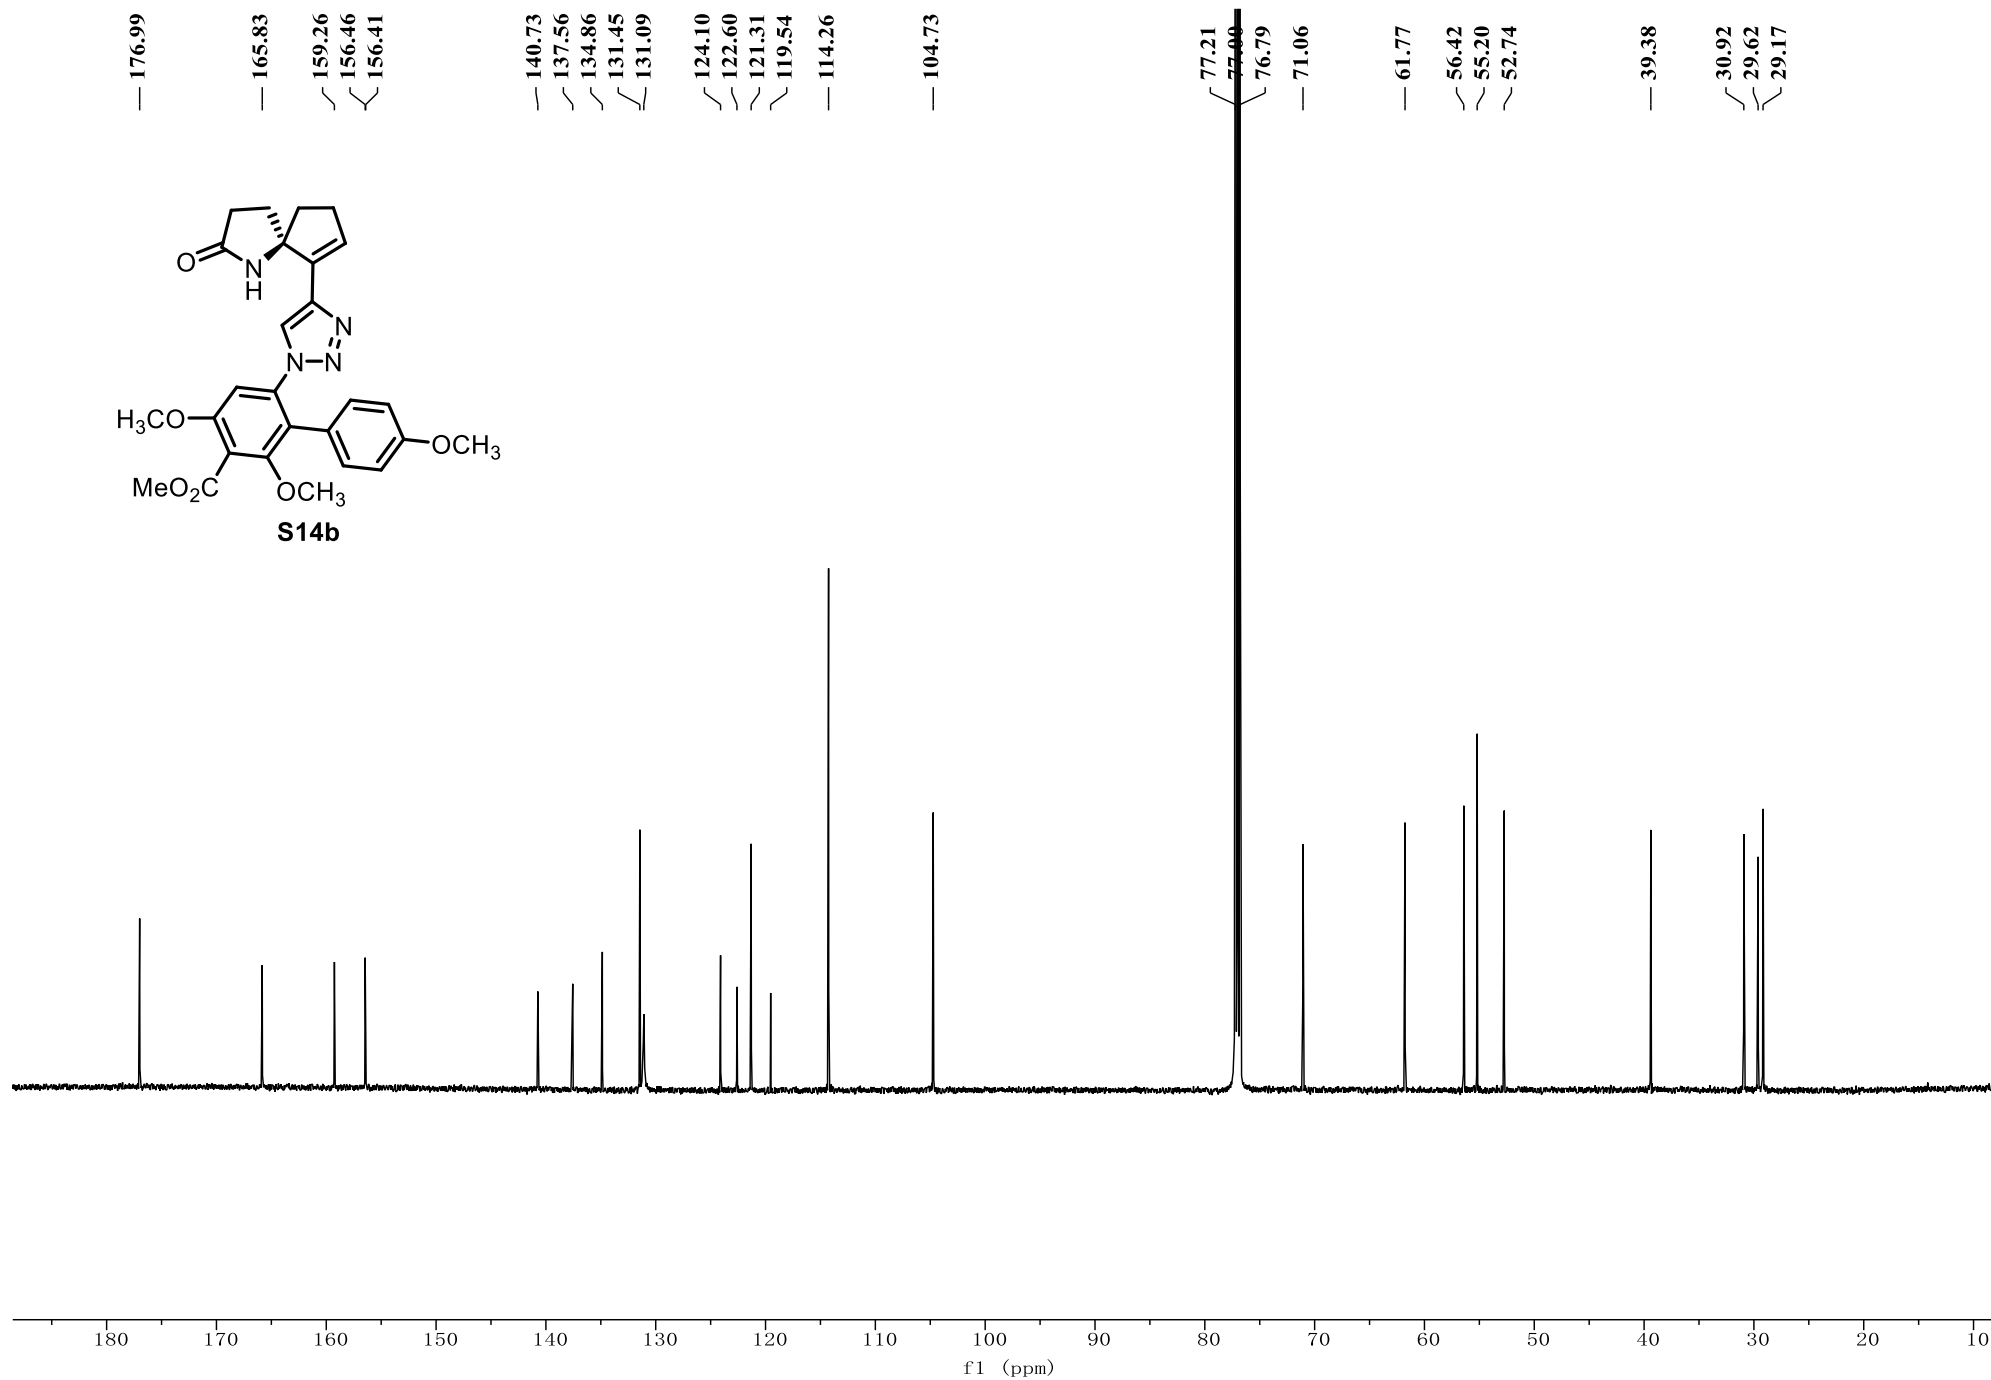

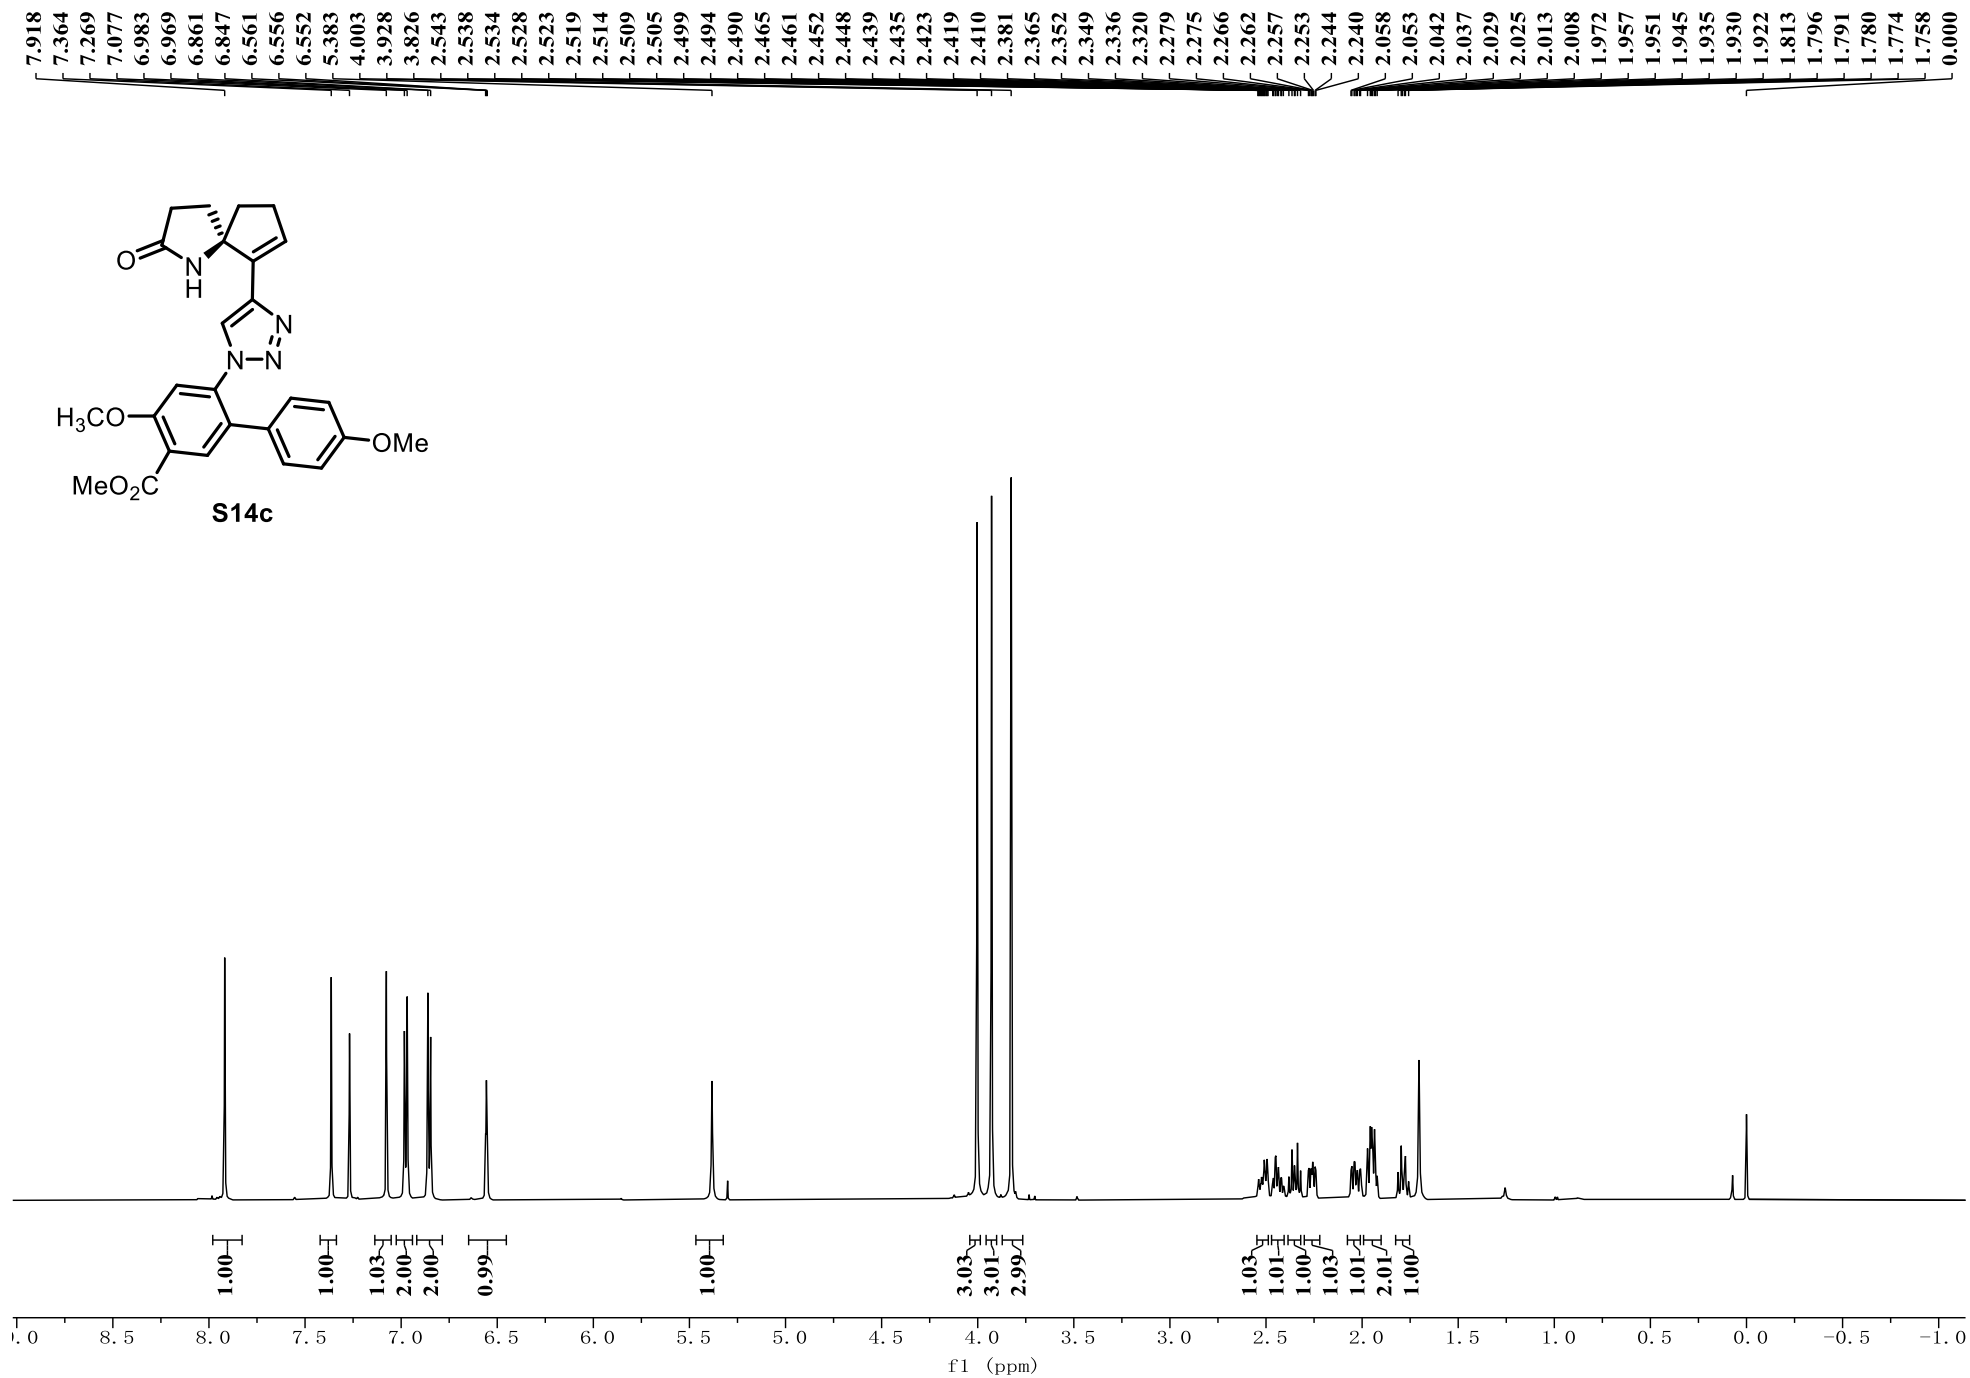

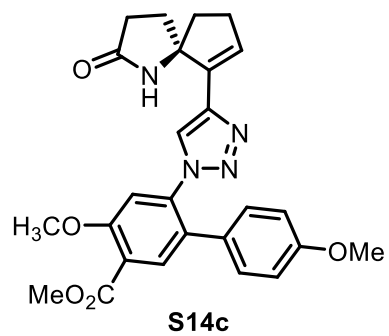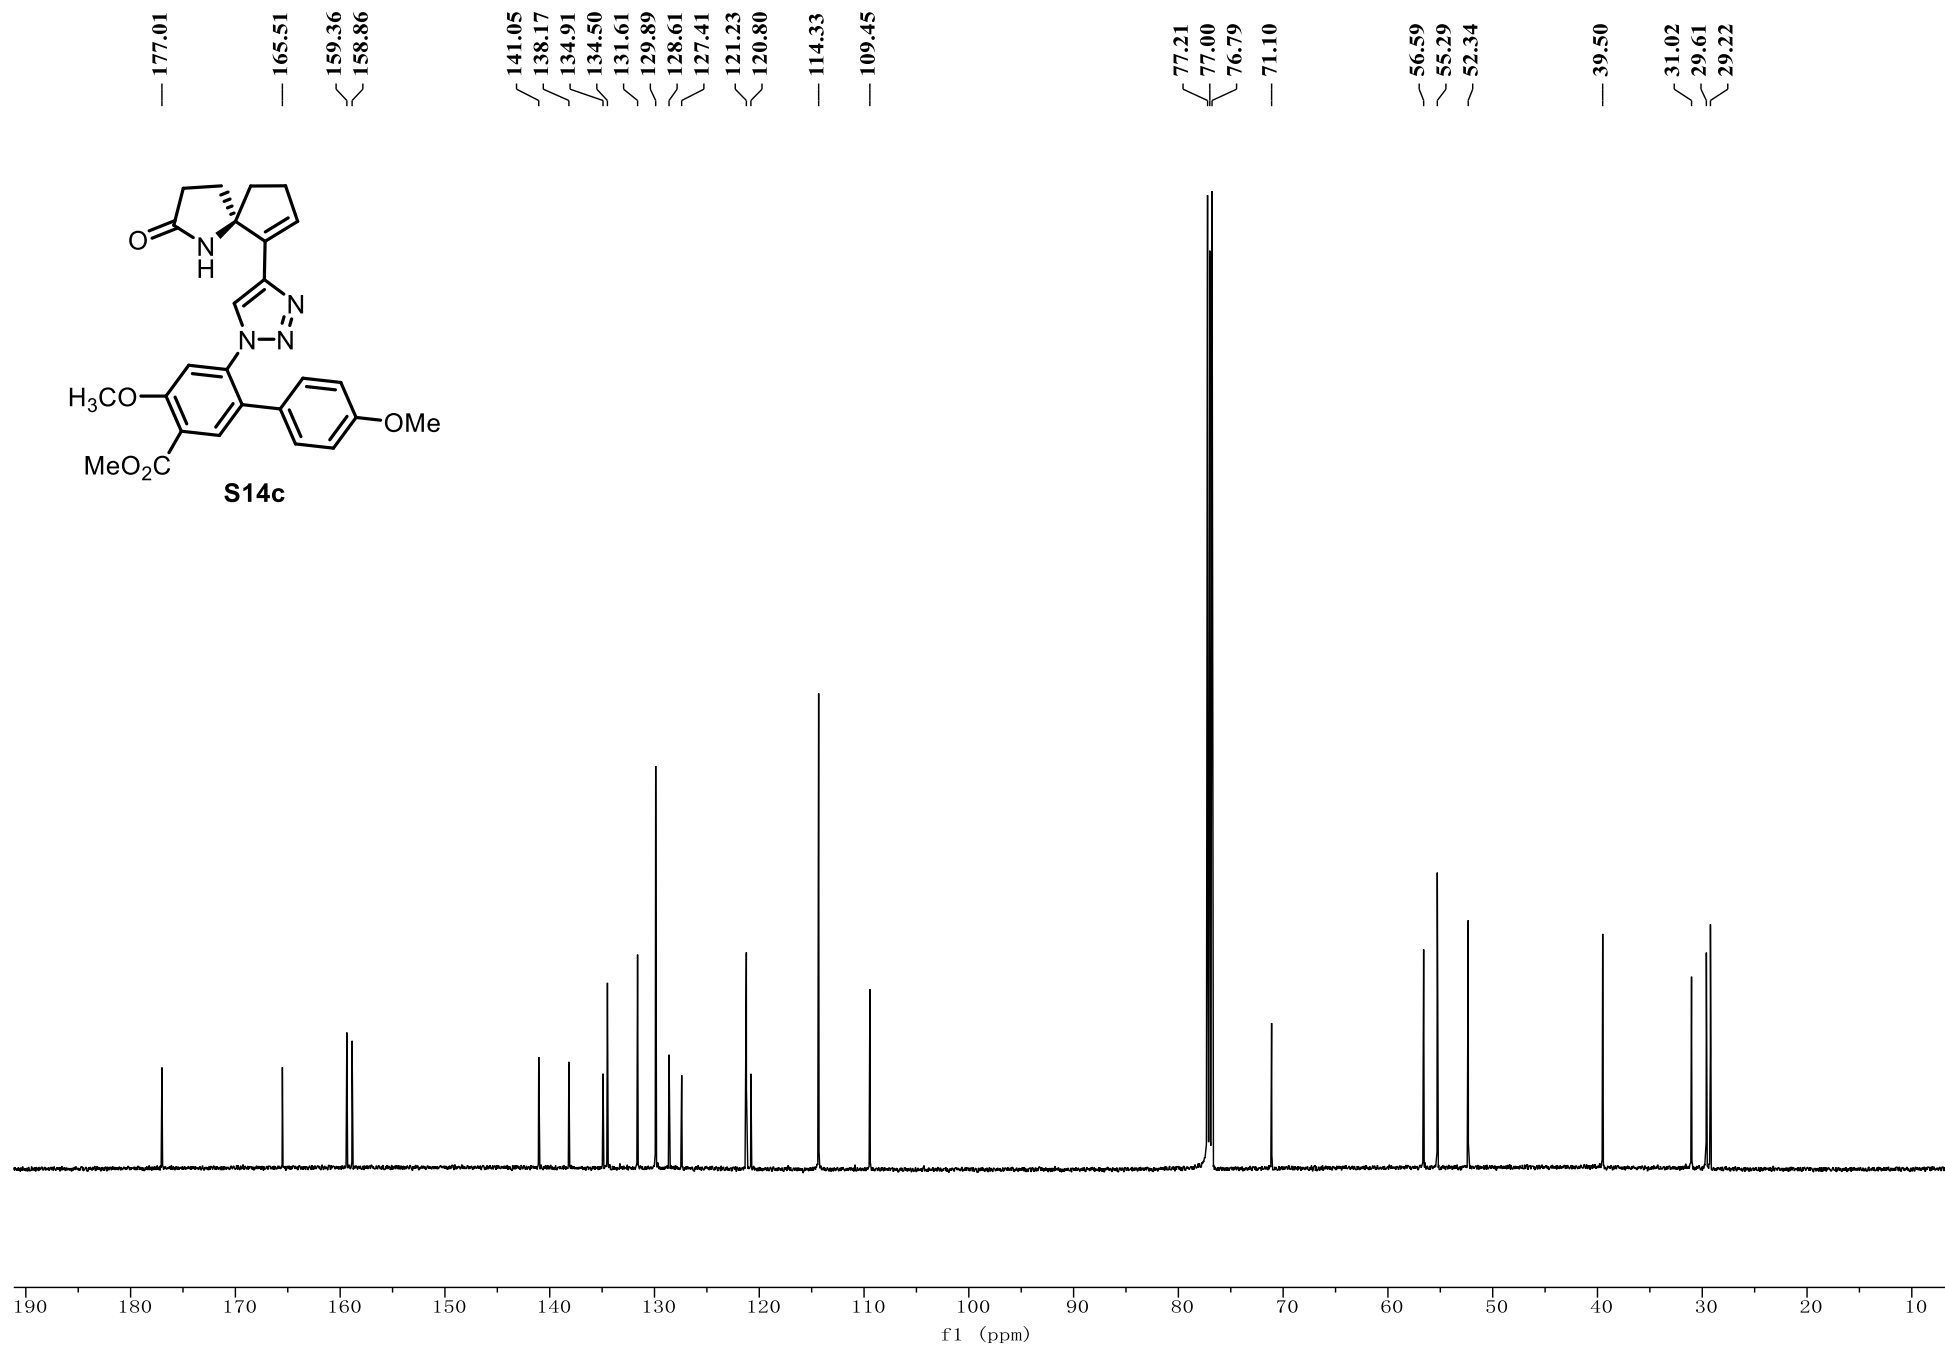

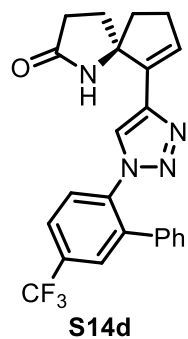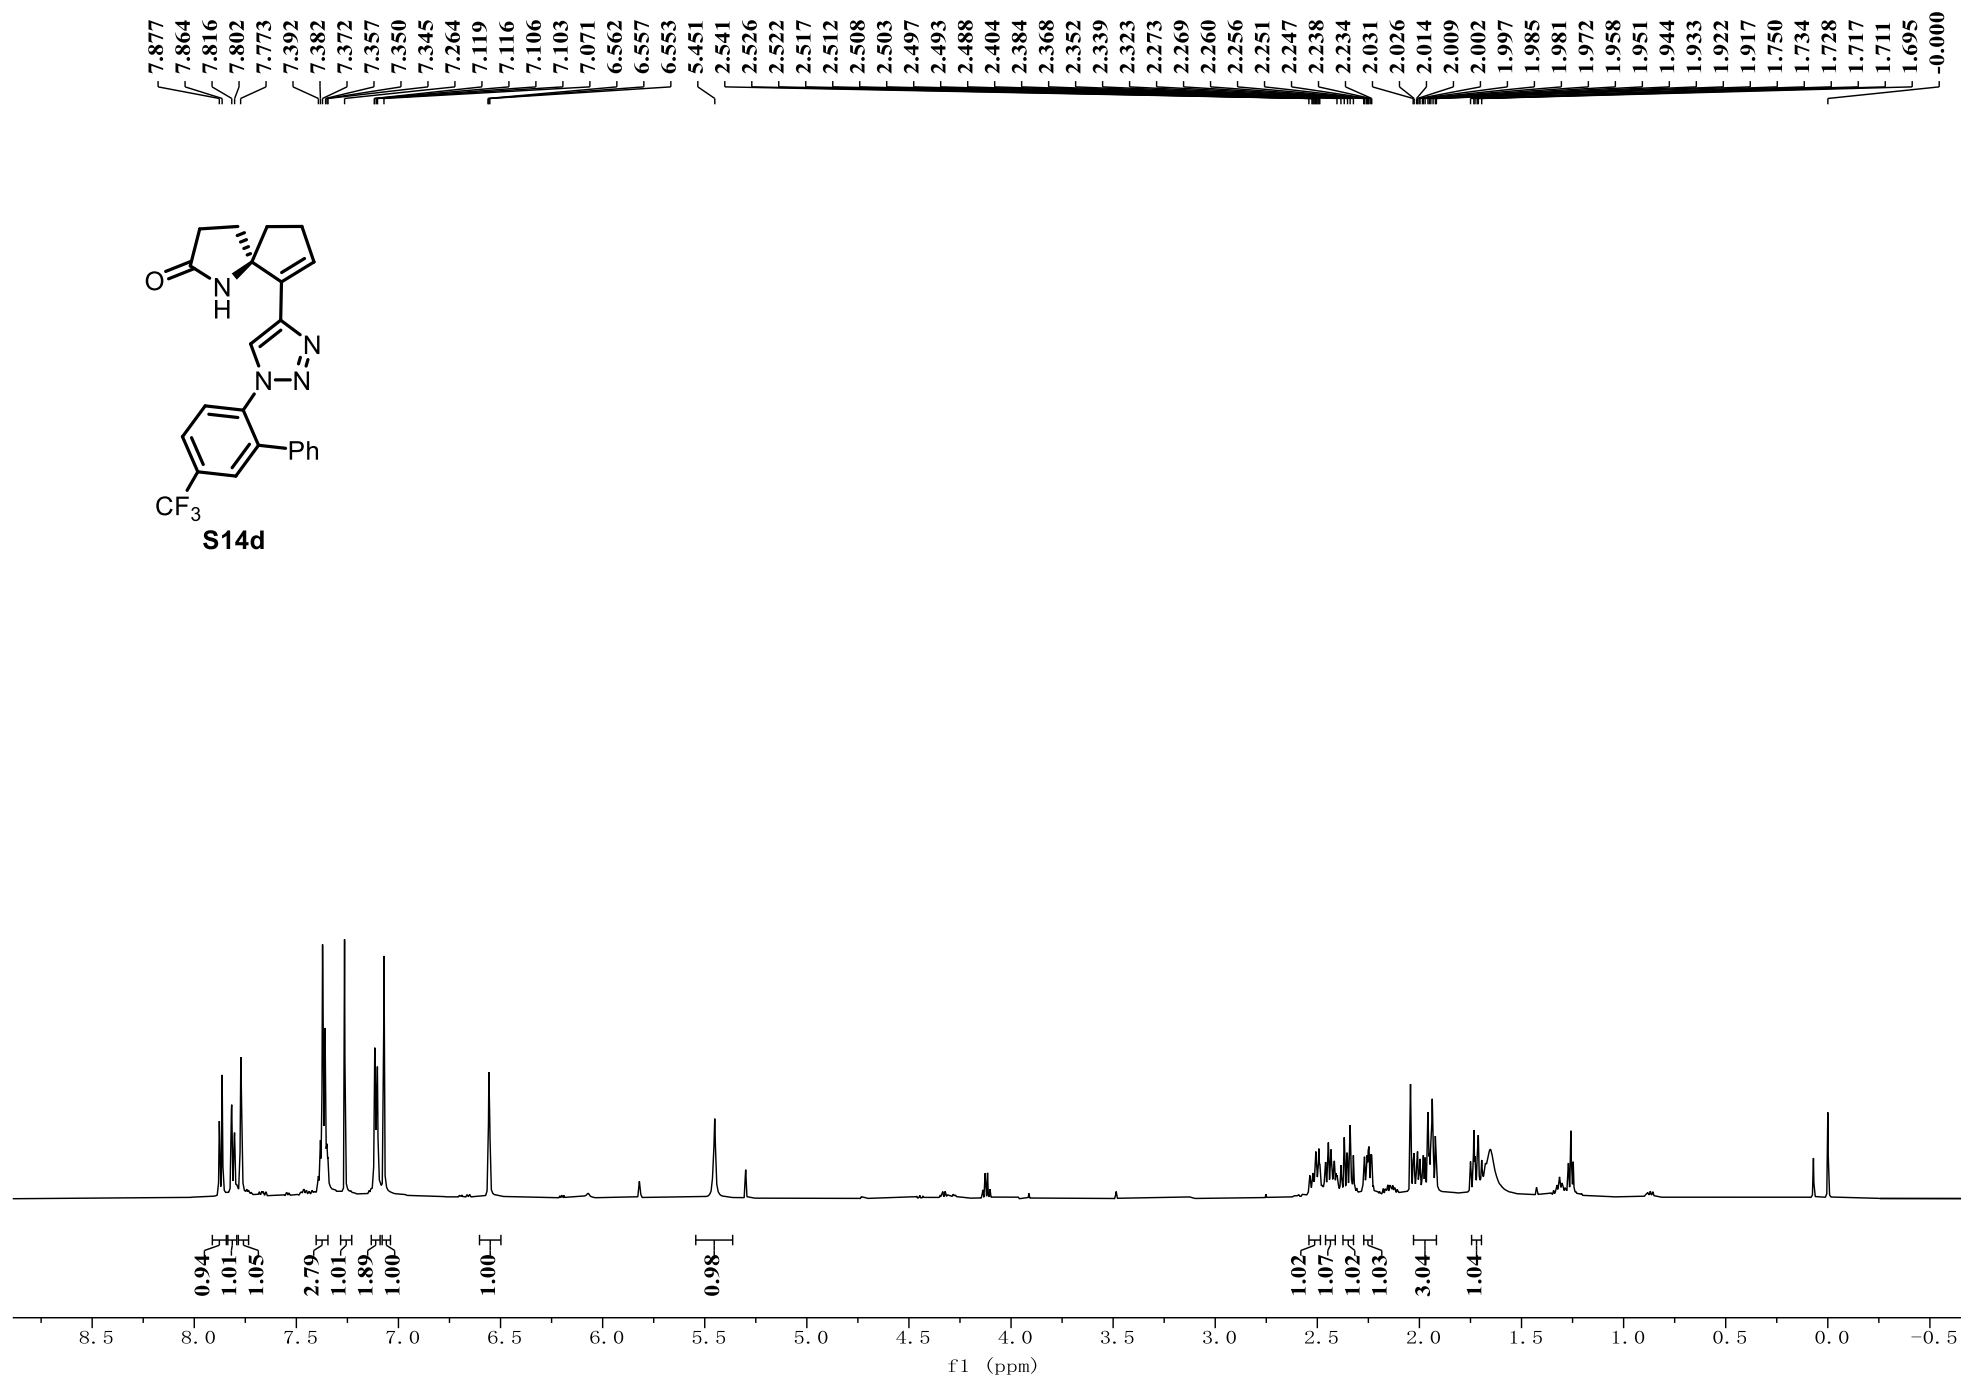

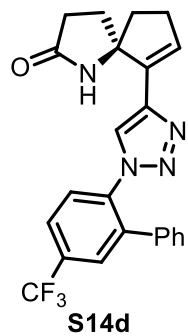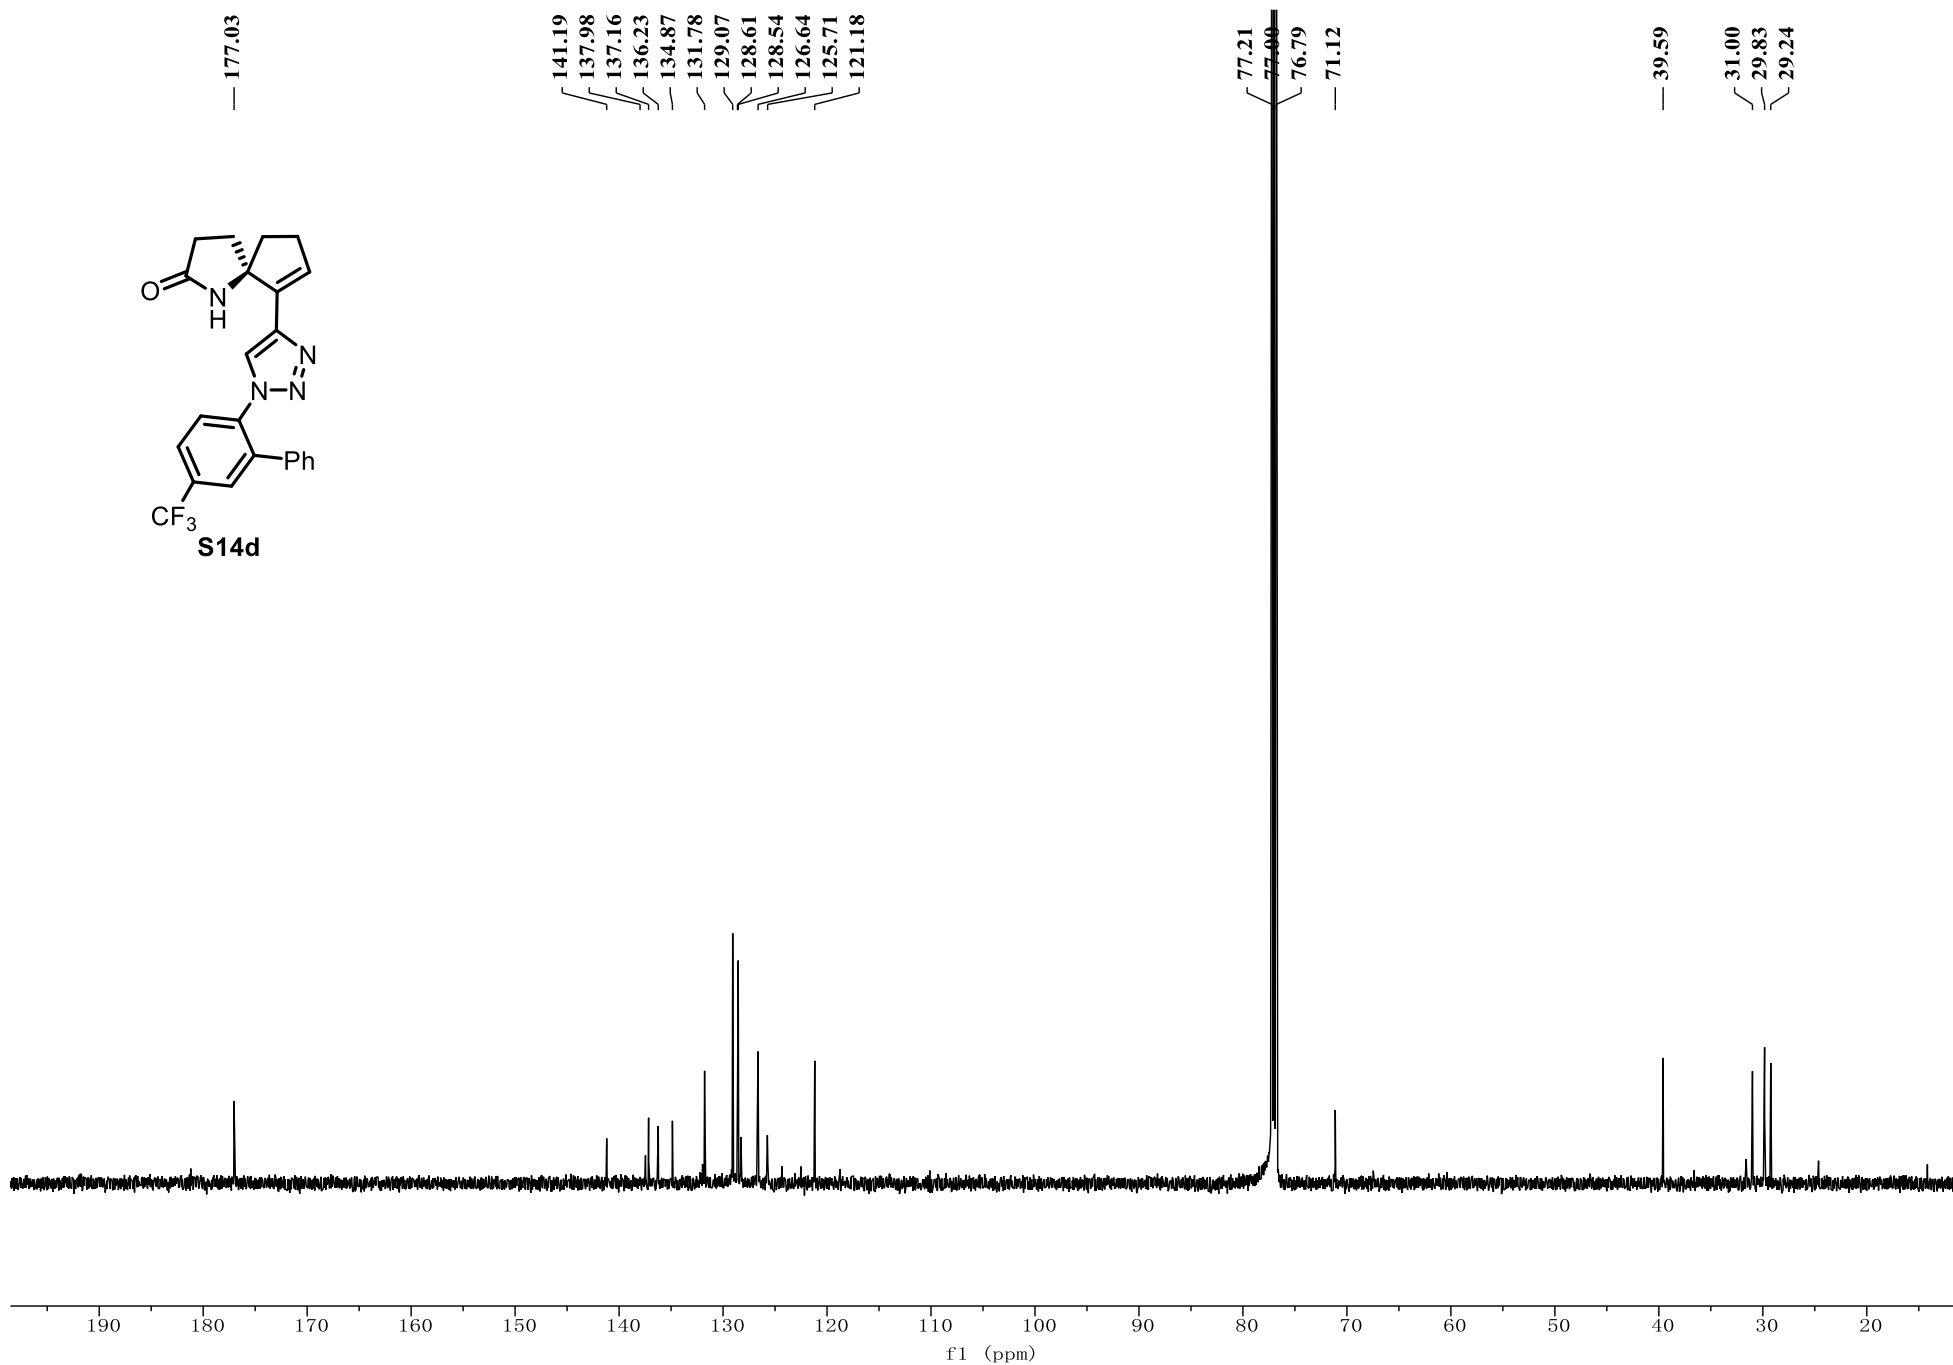

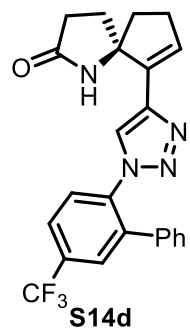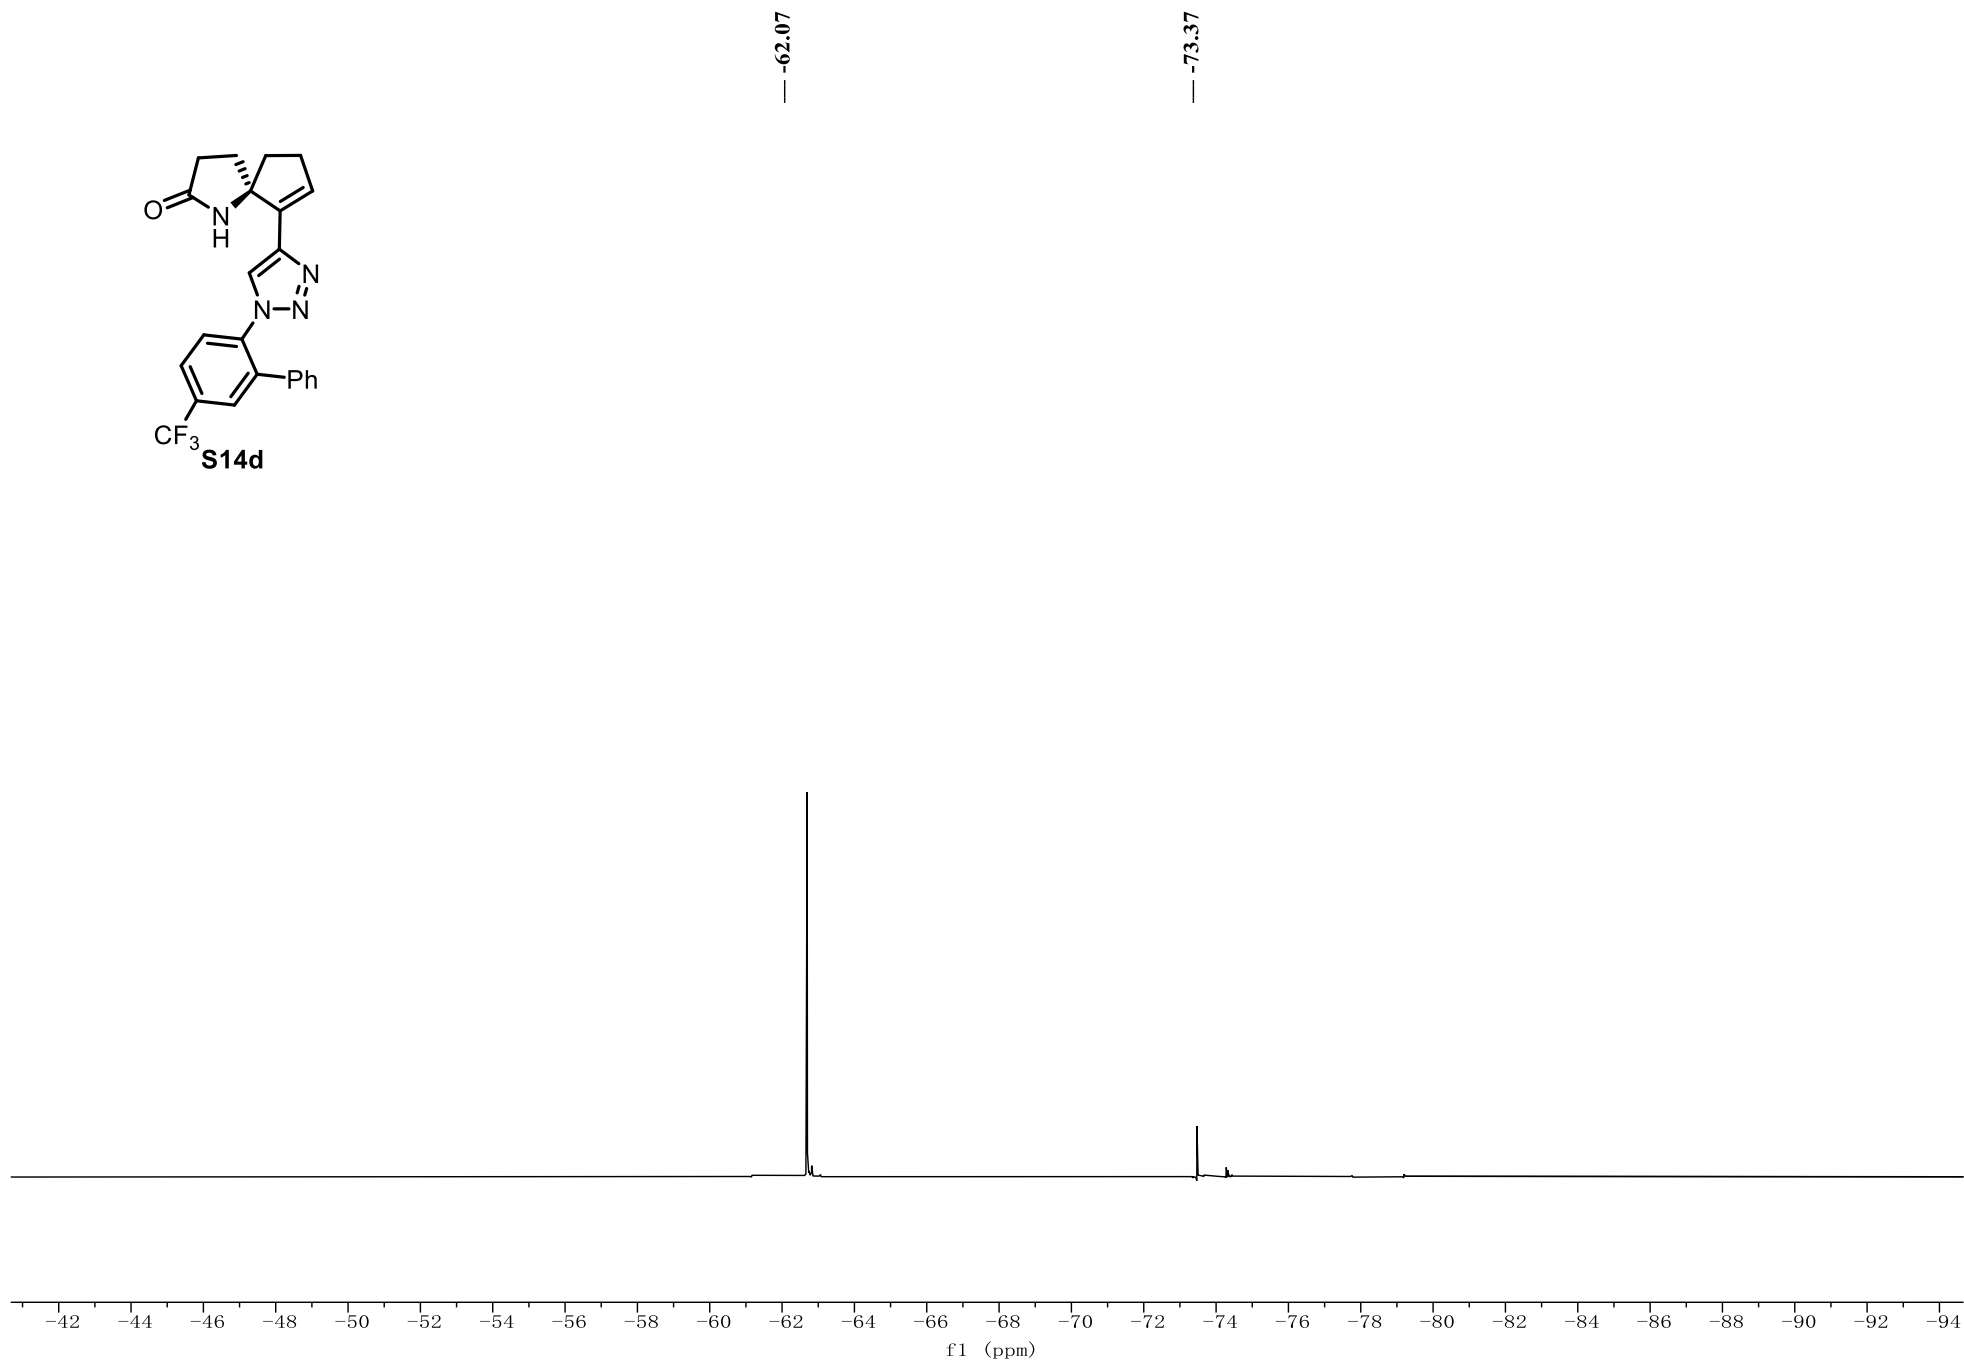

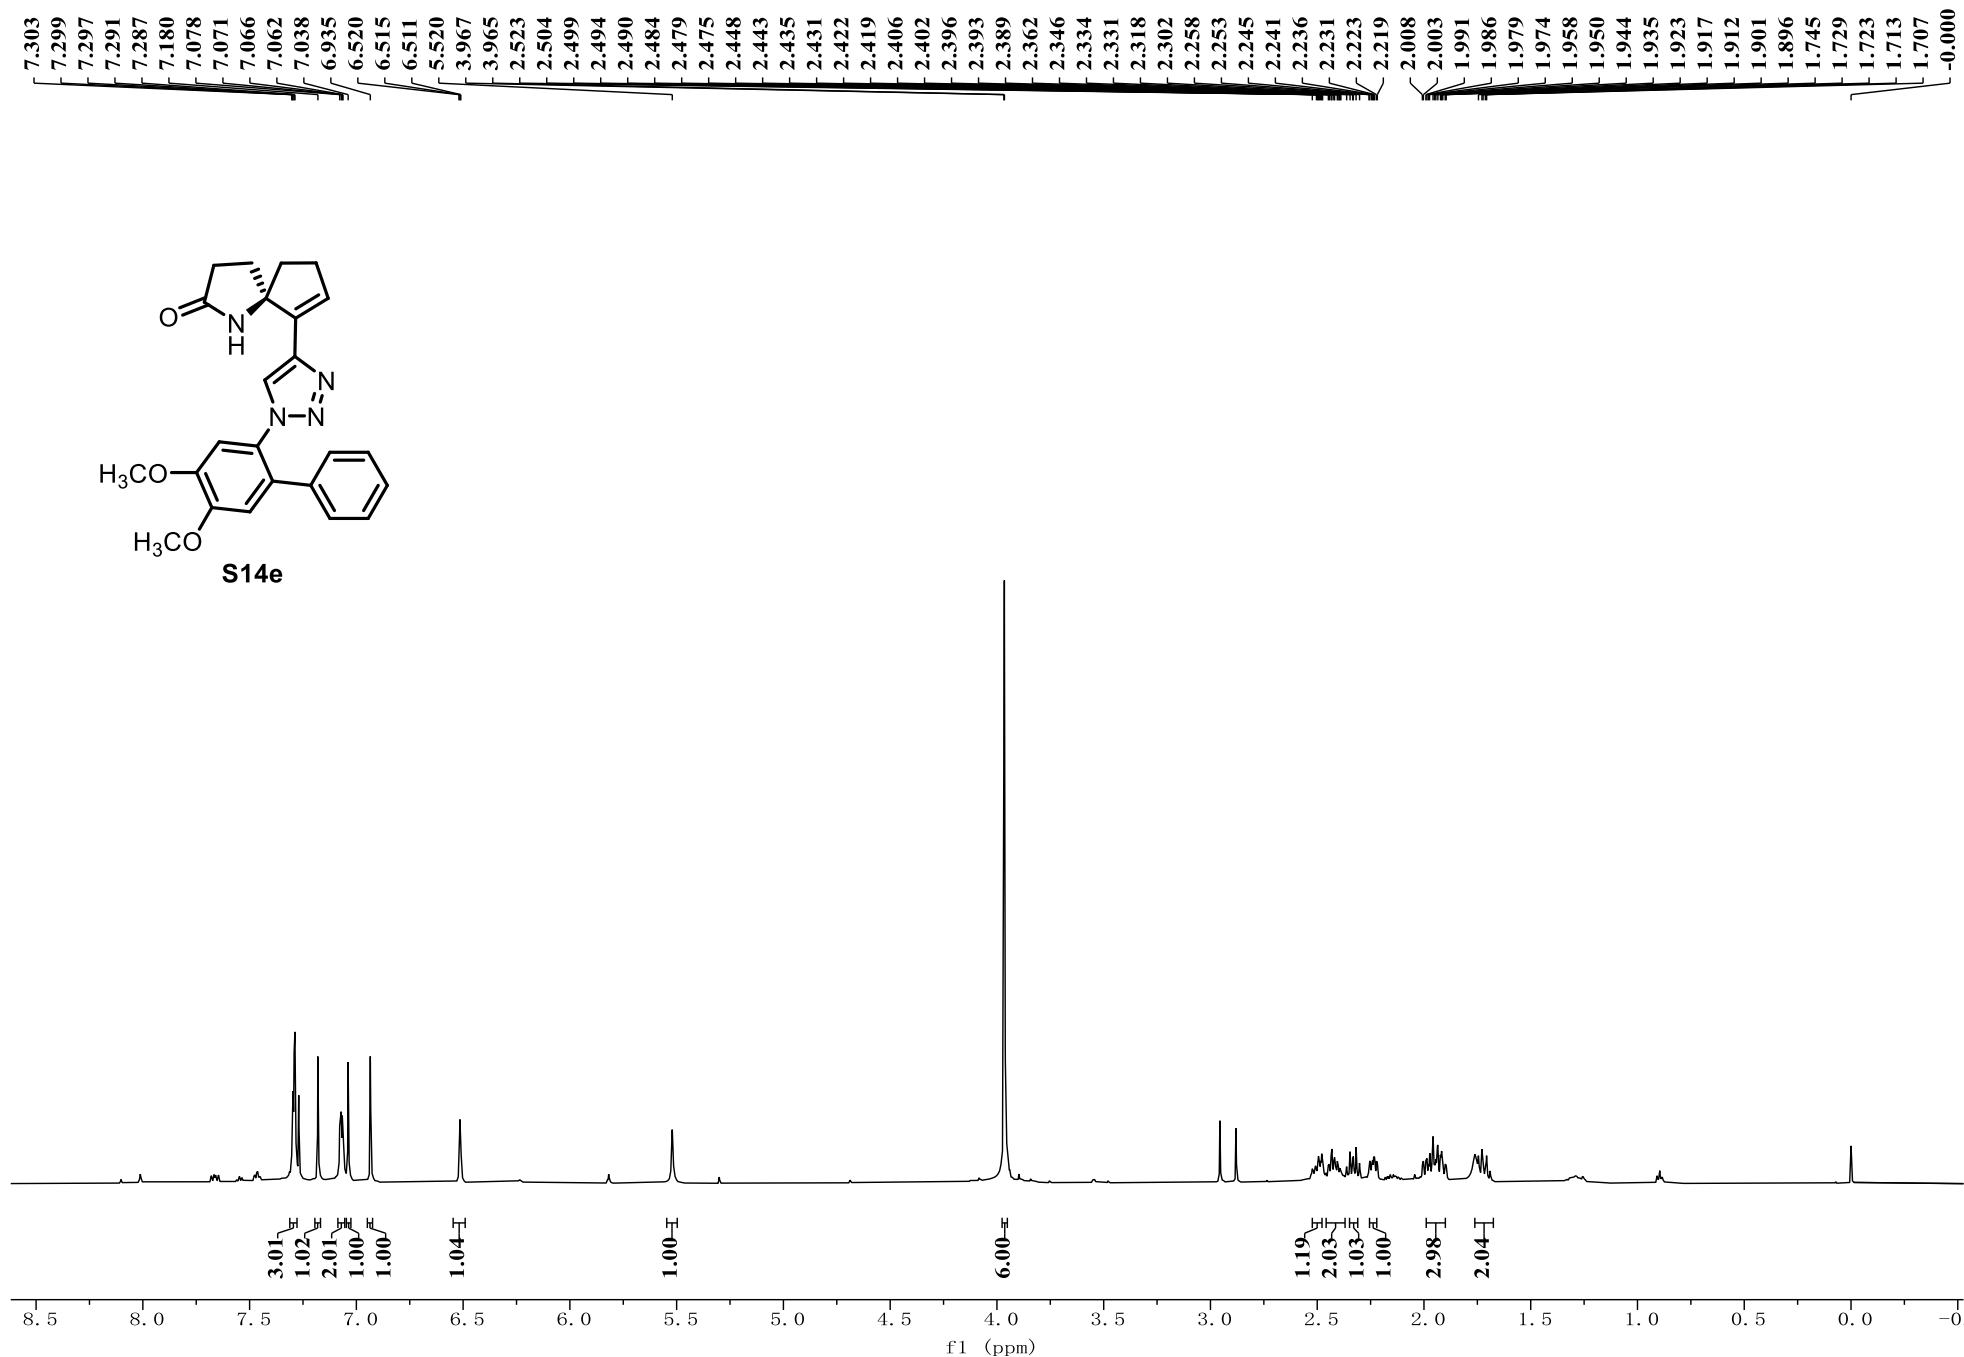

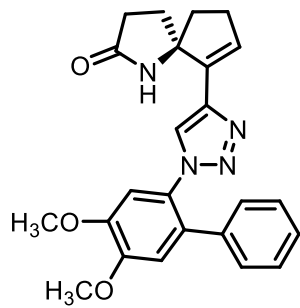

**S14e**

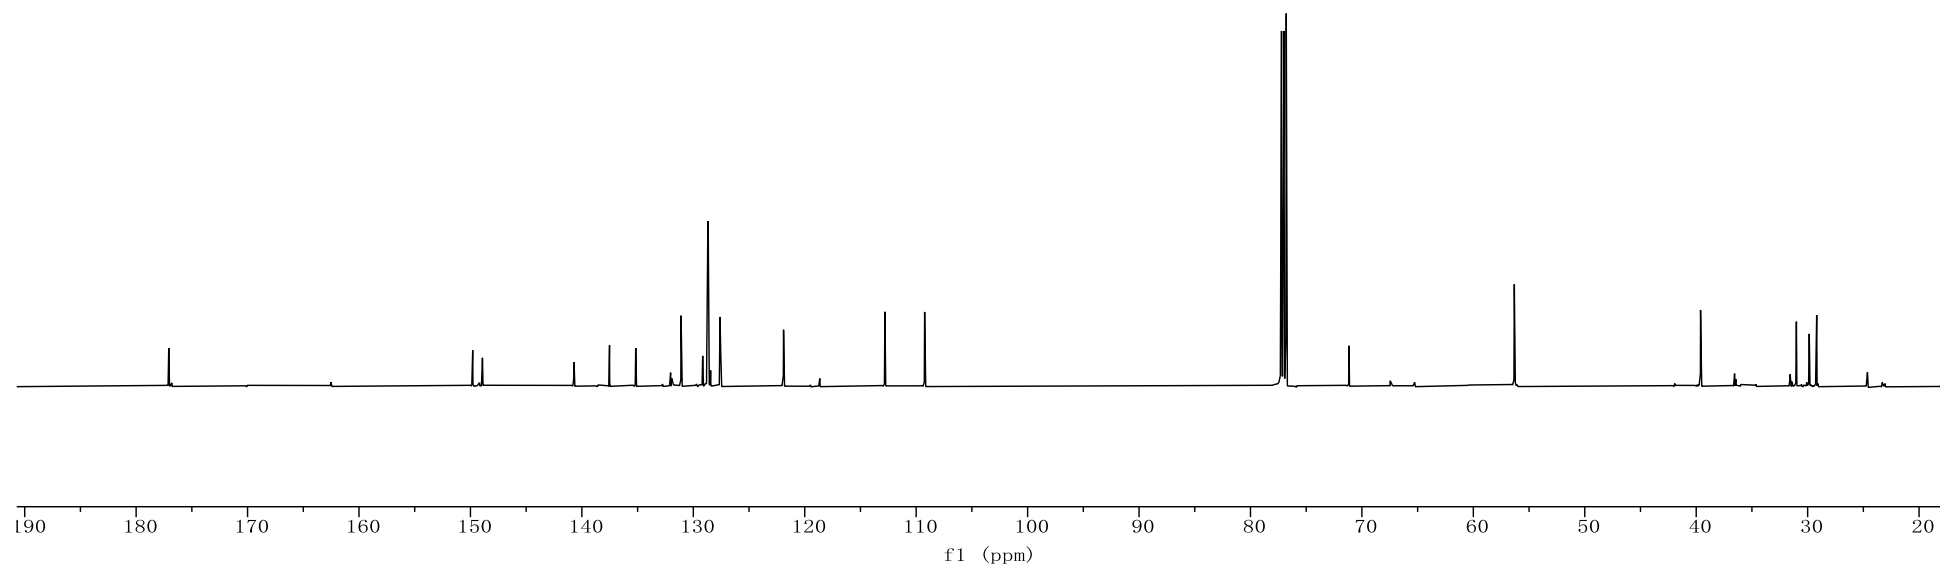



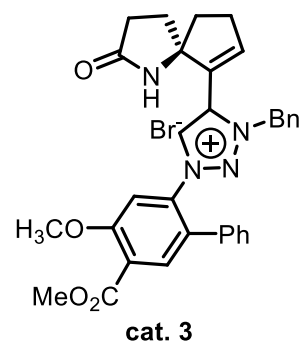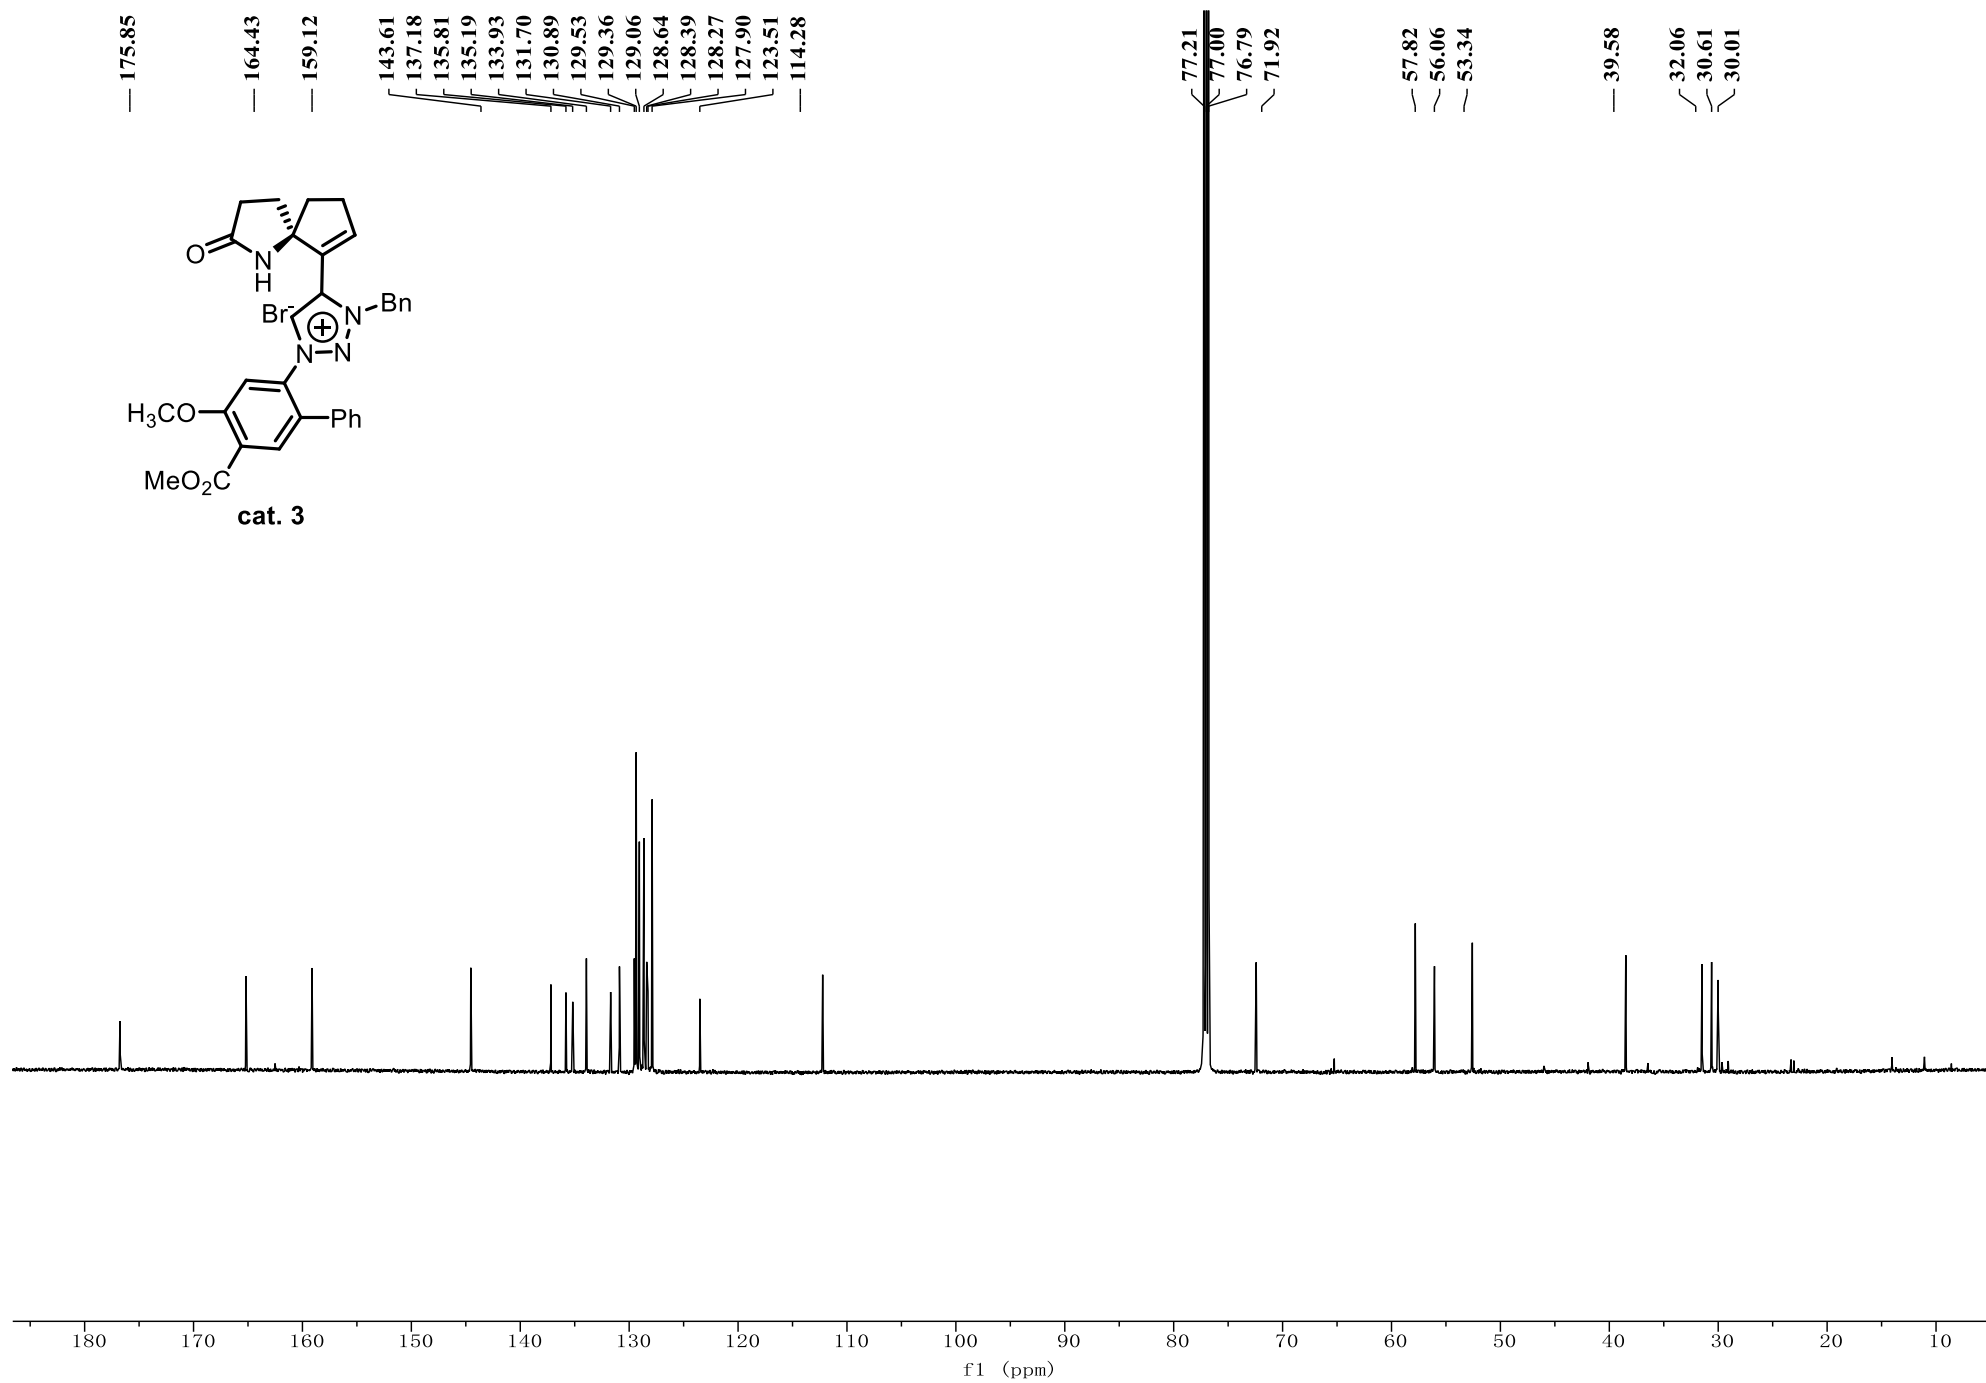

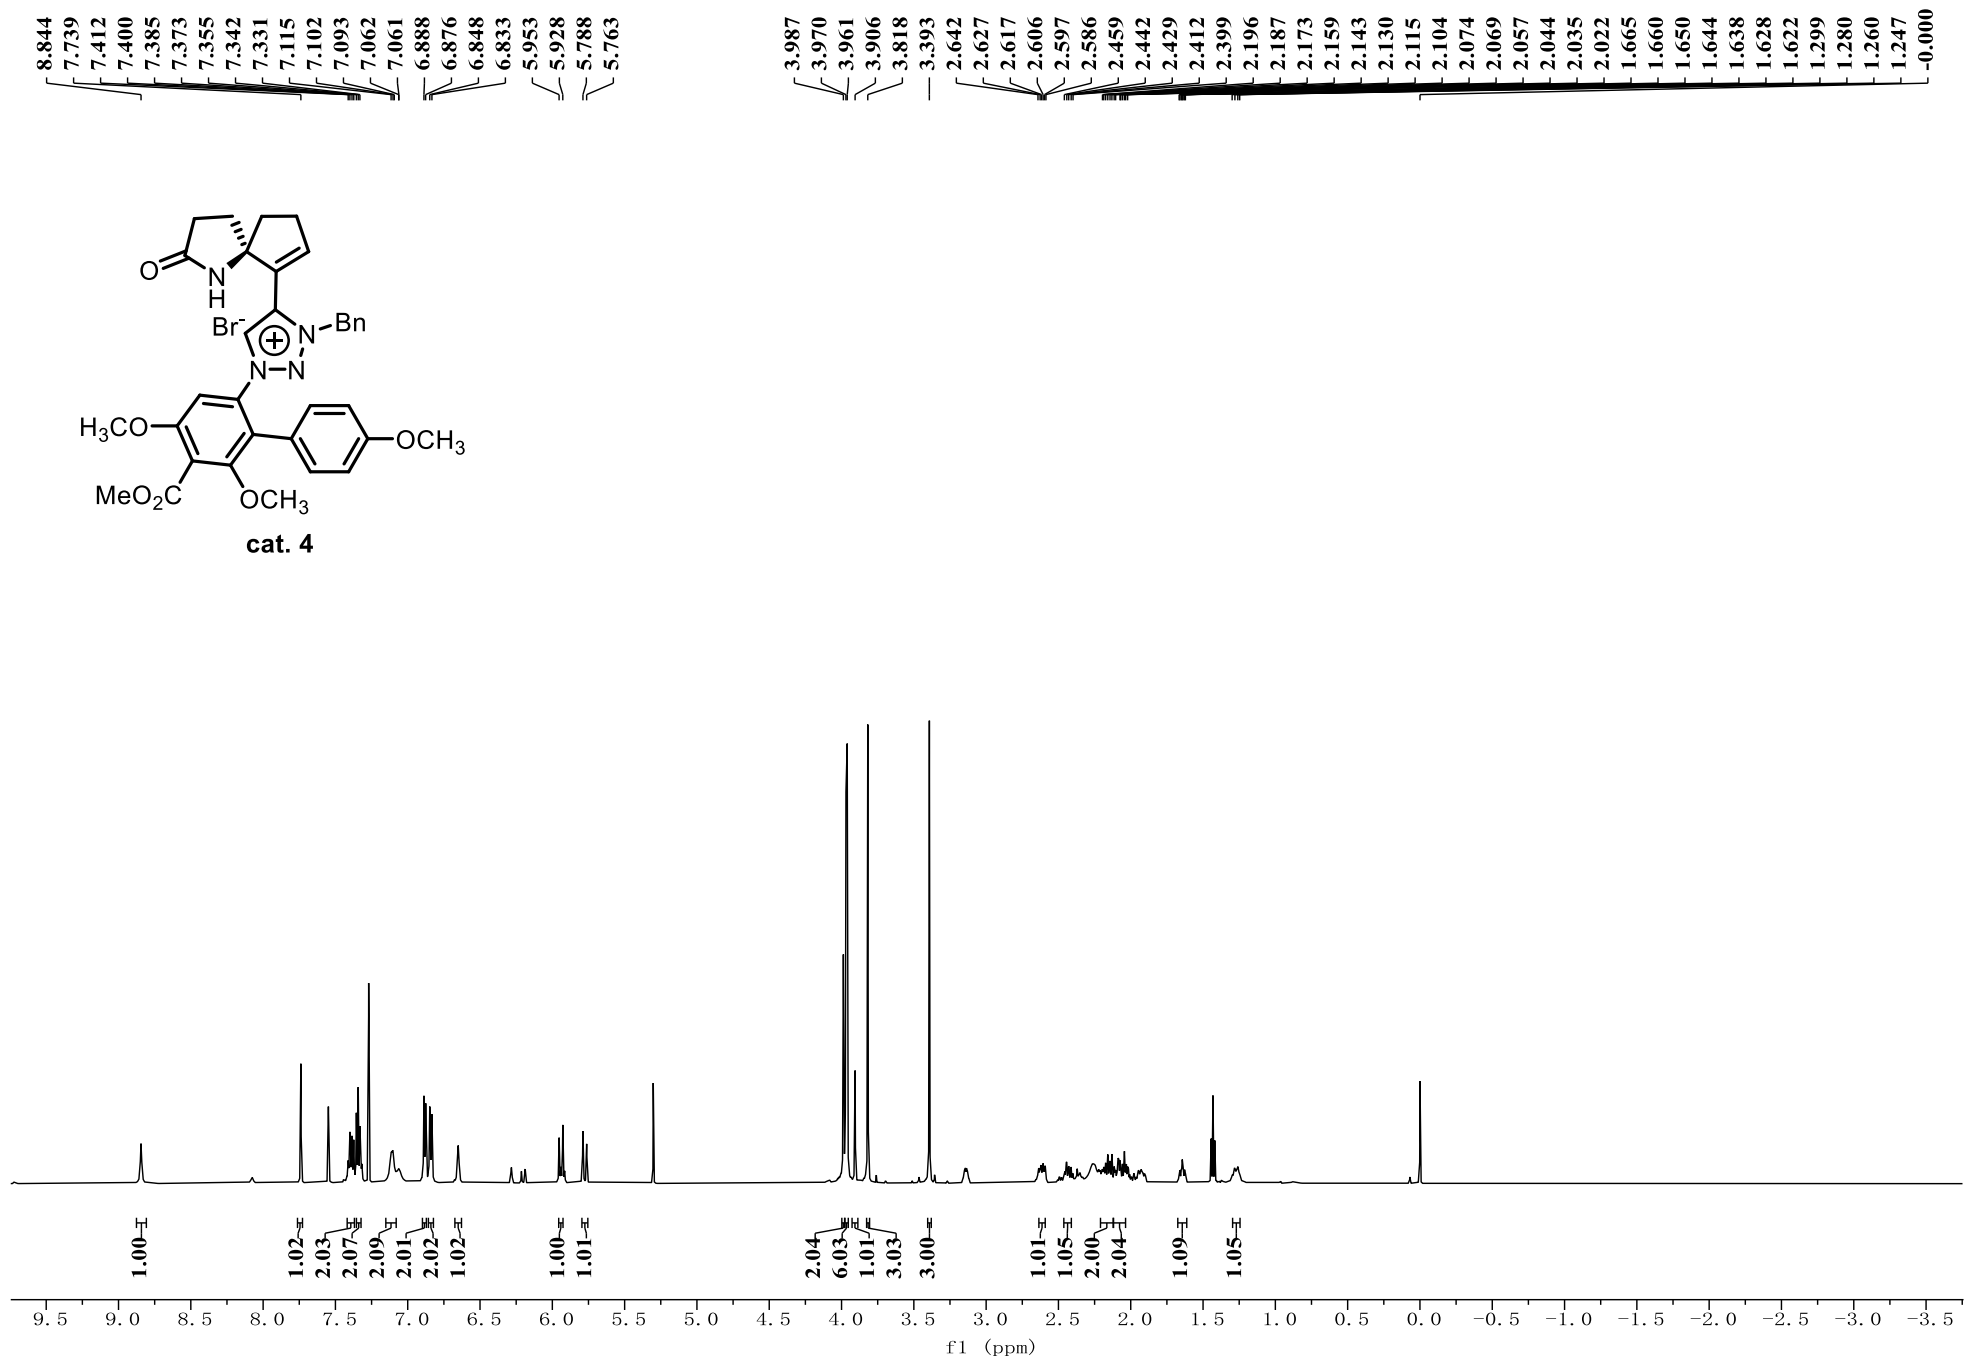

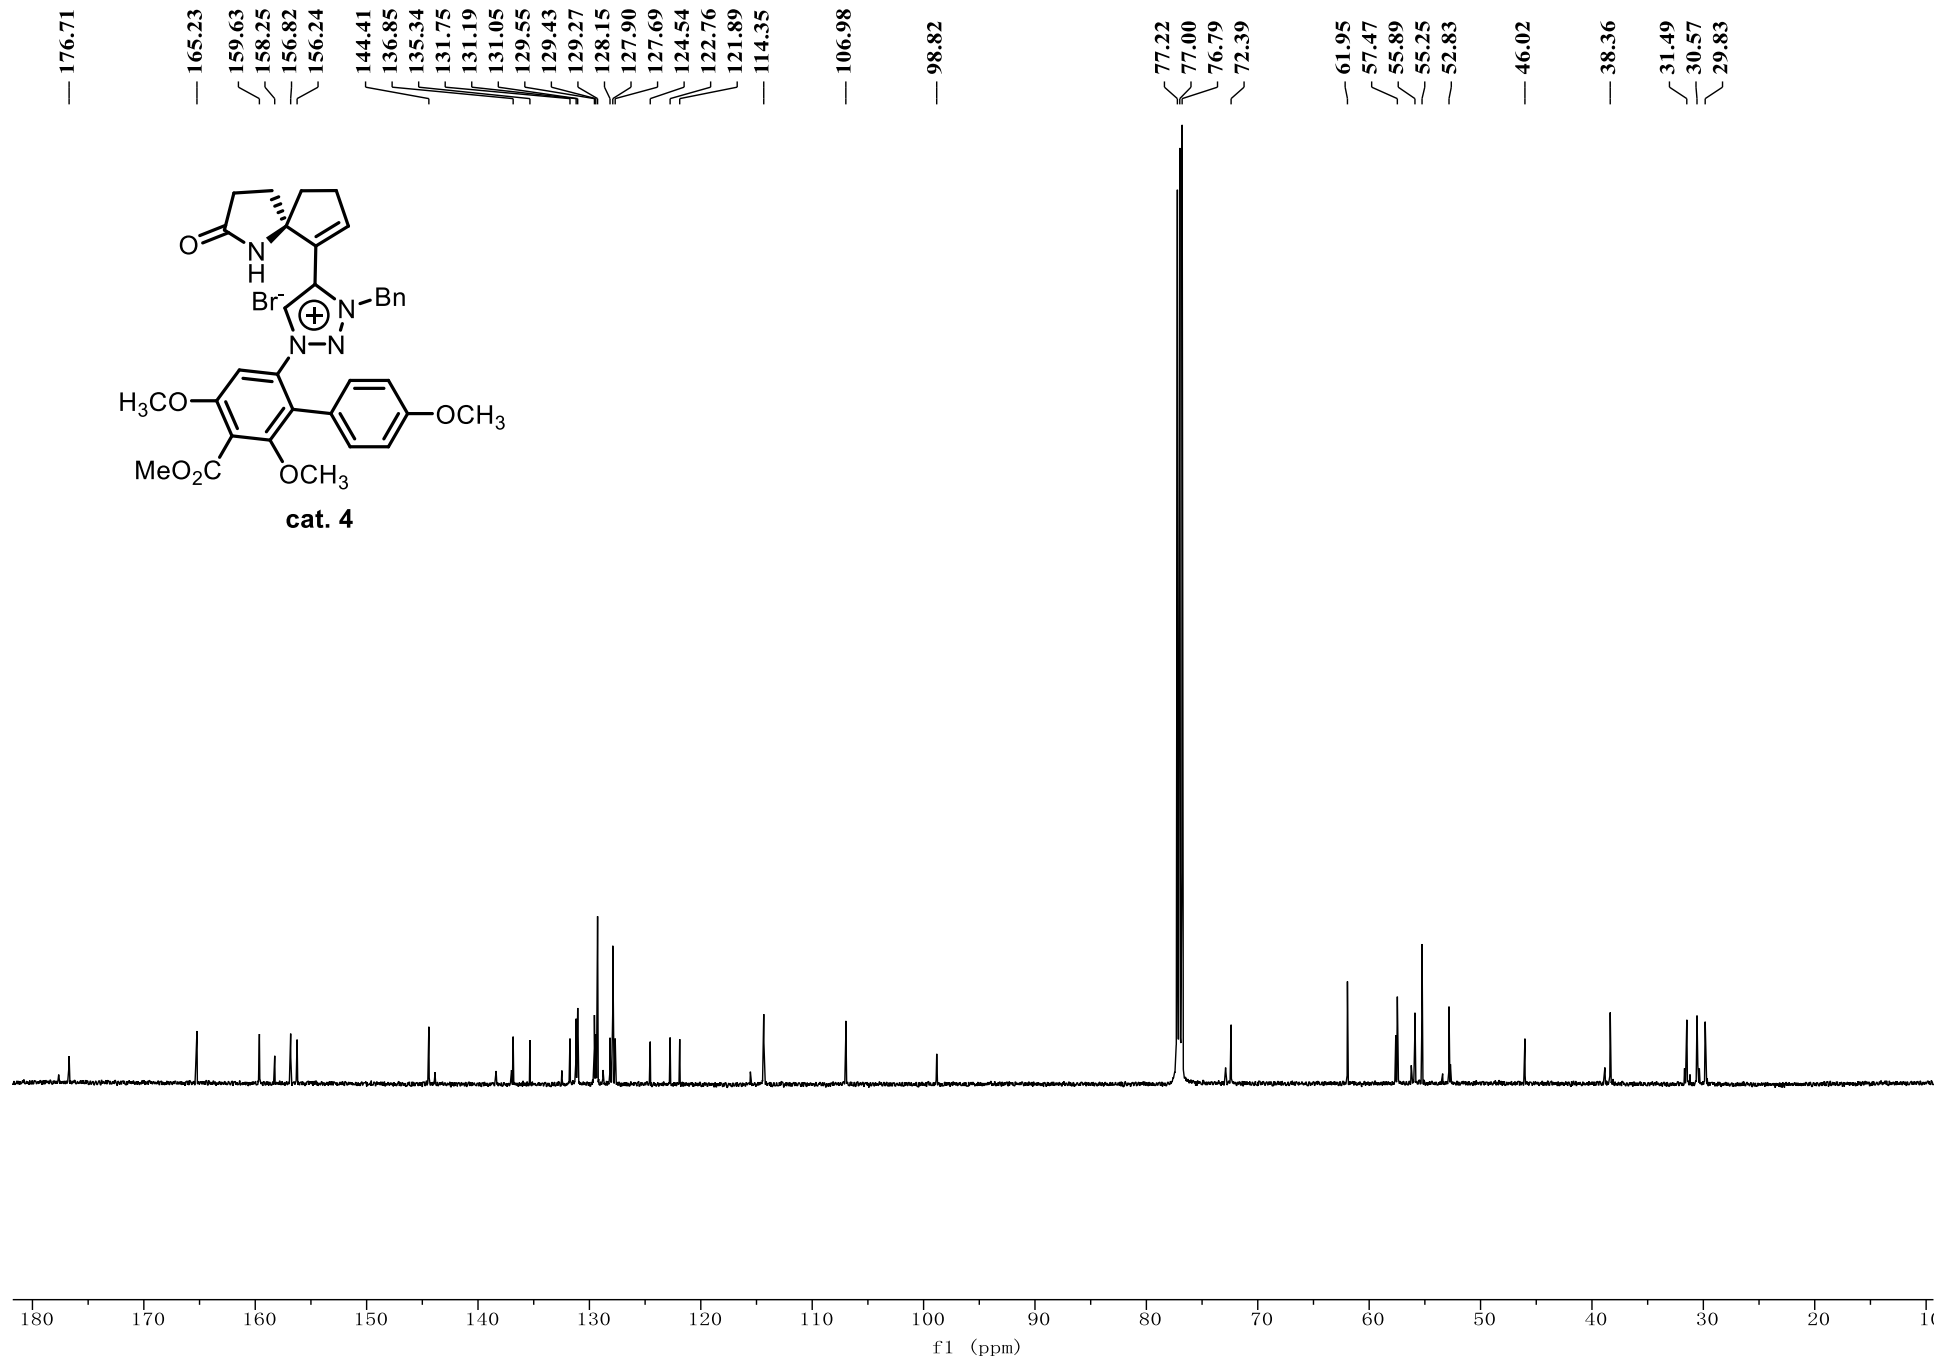

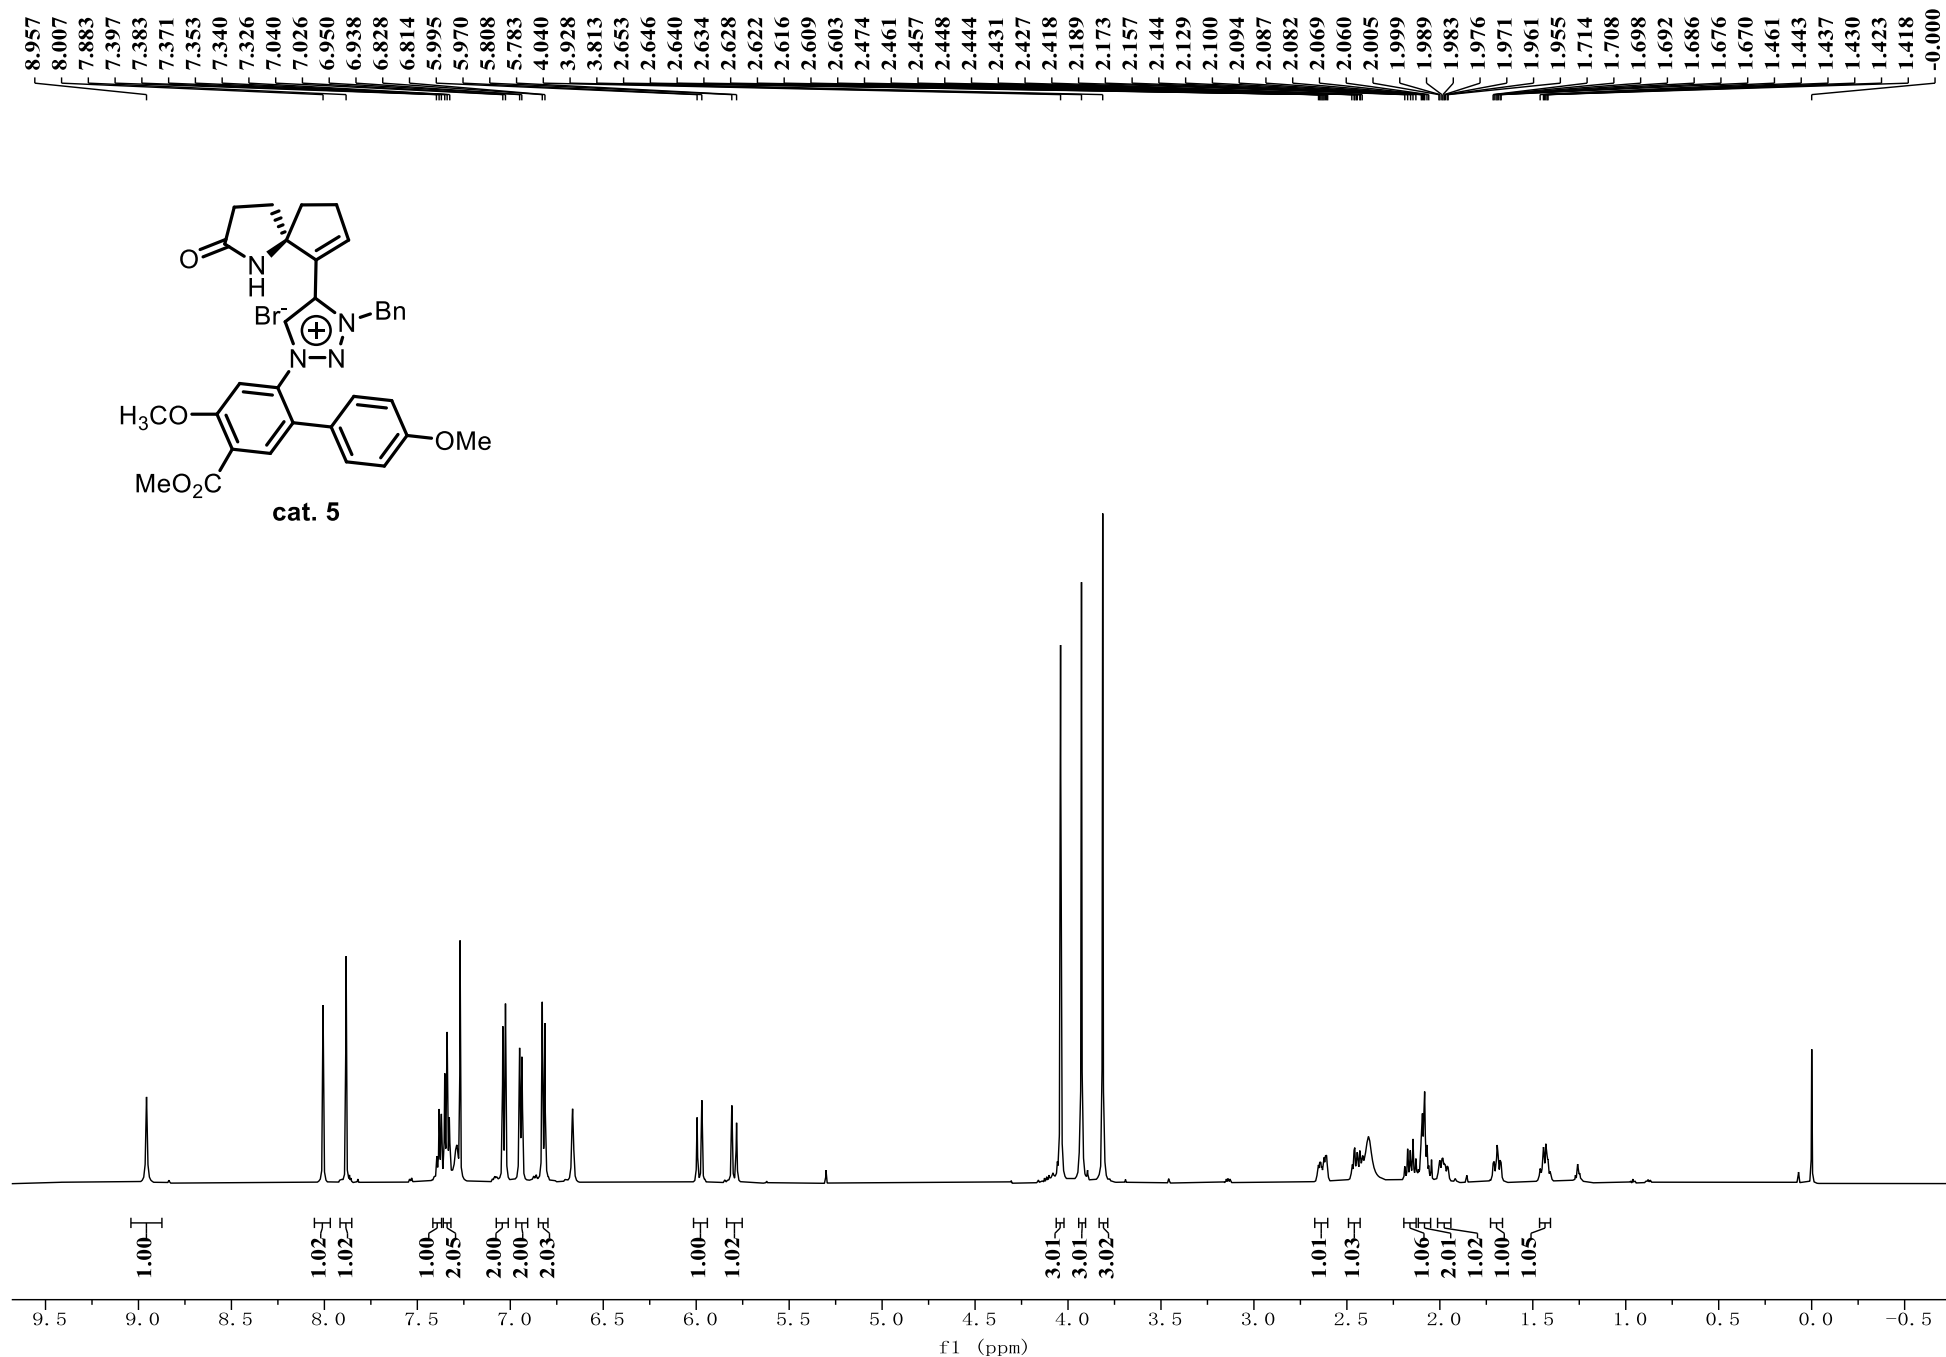

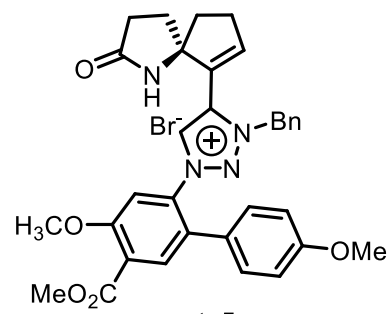

cat. 5

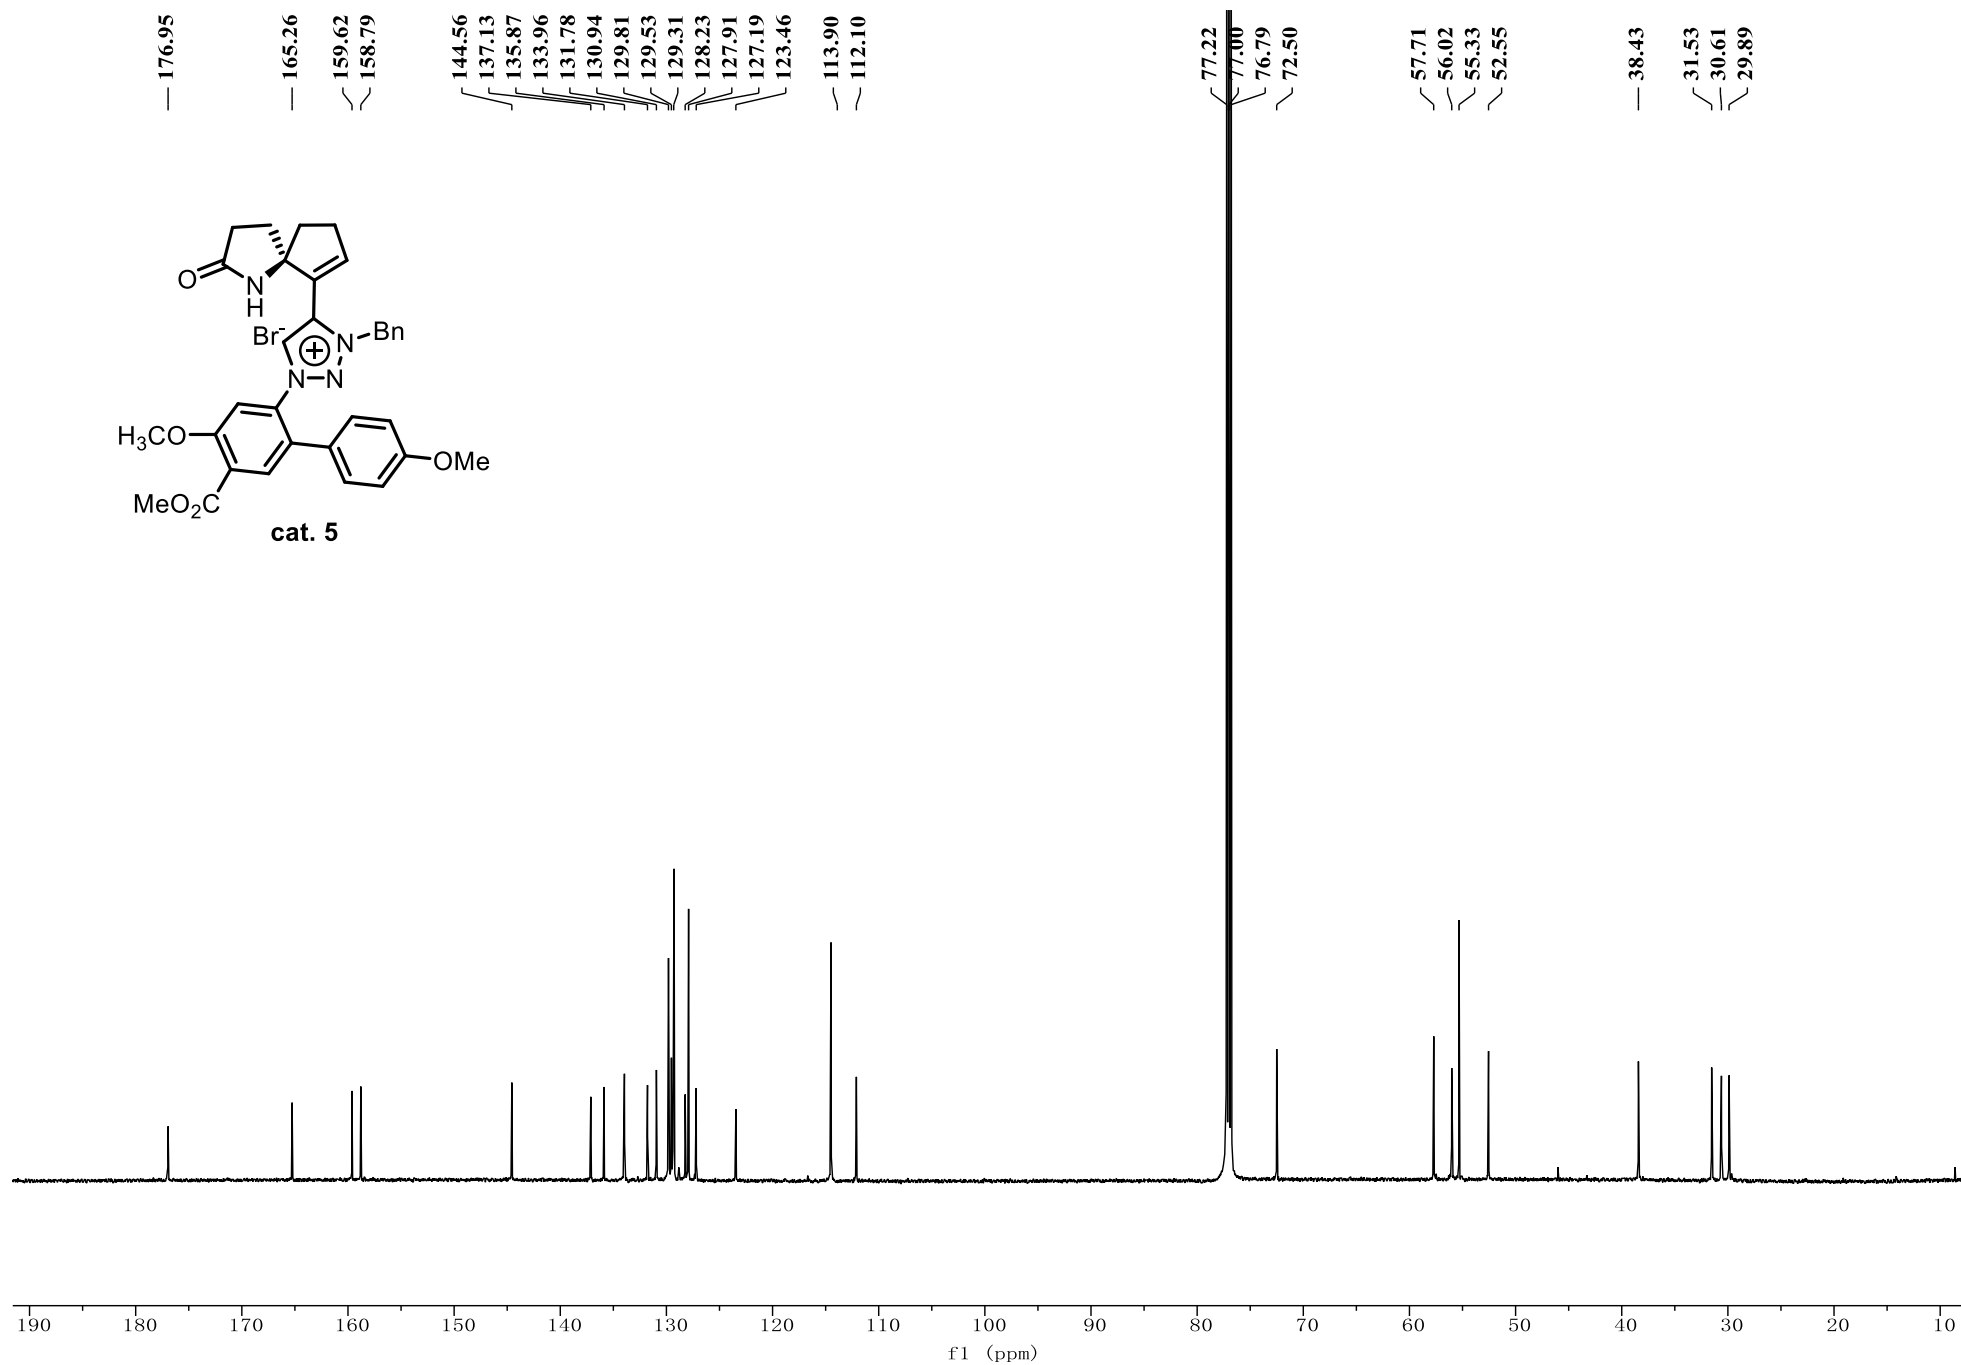

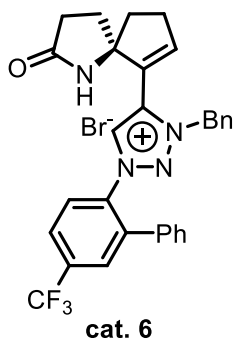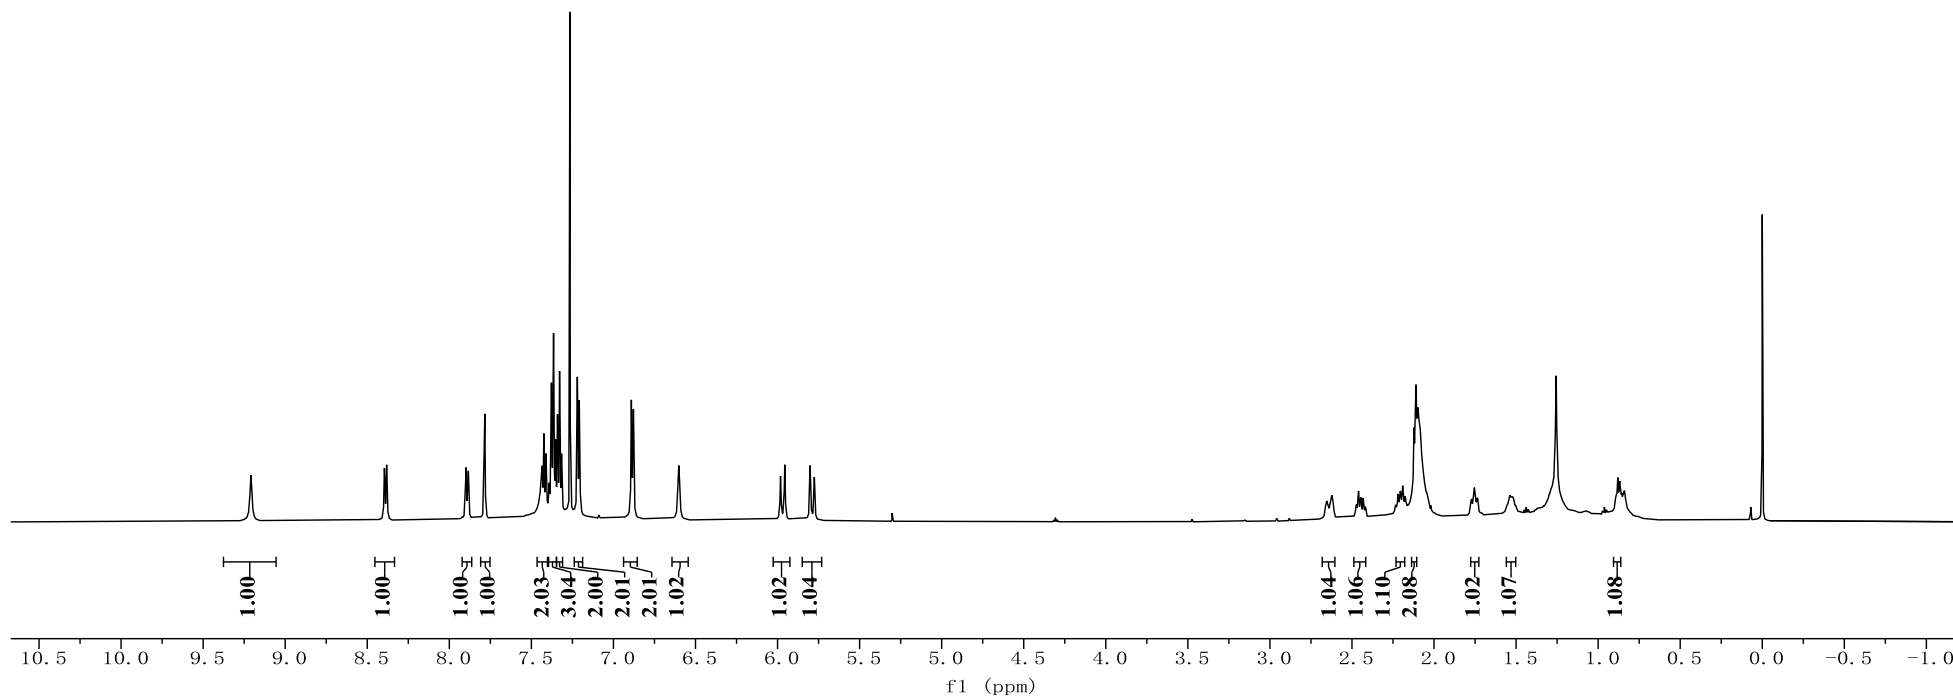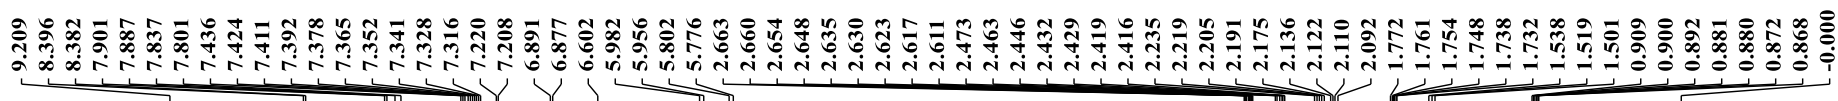

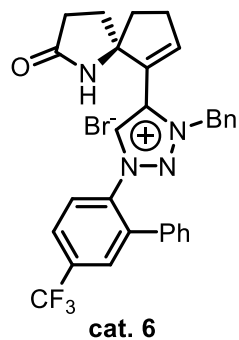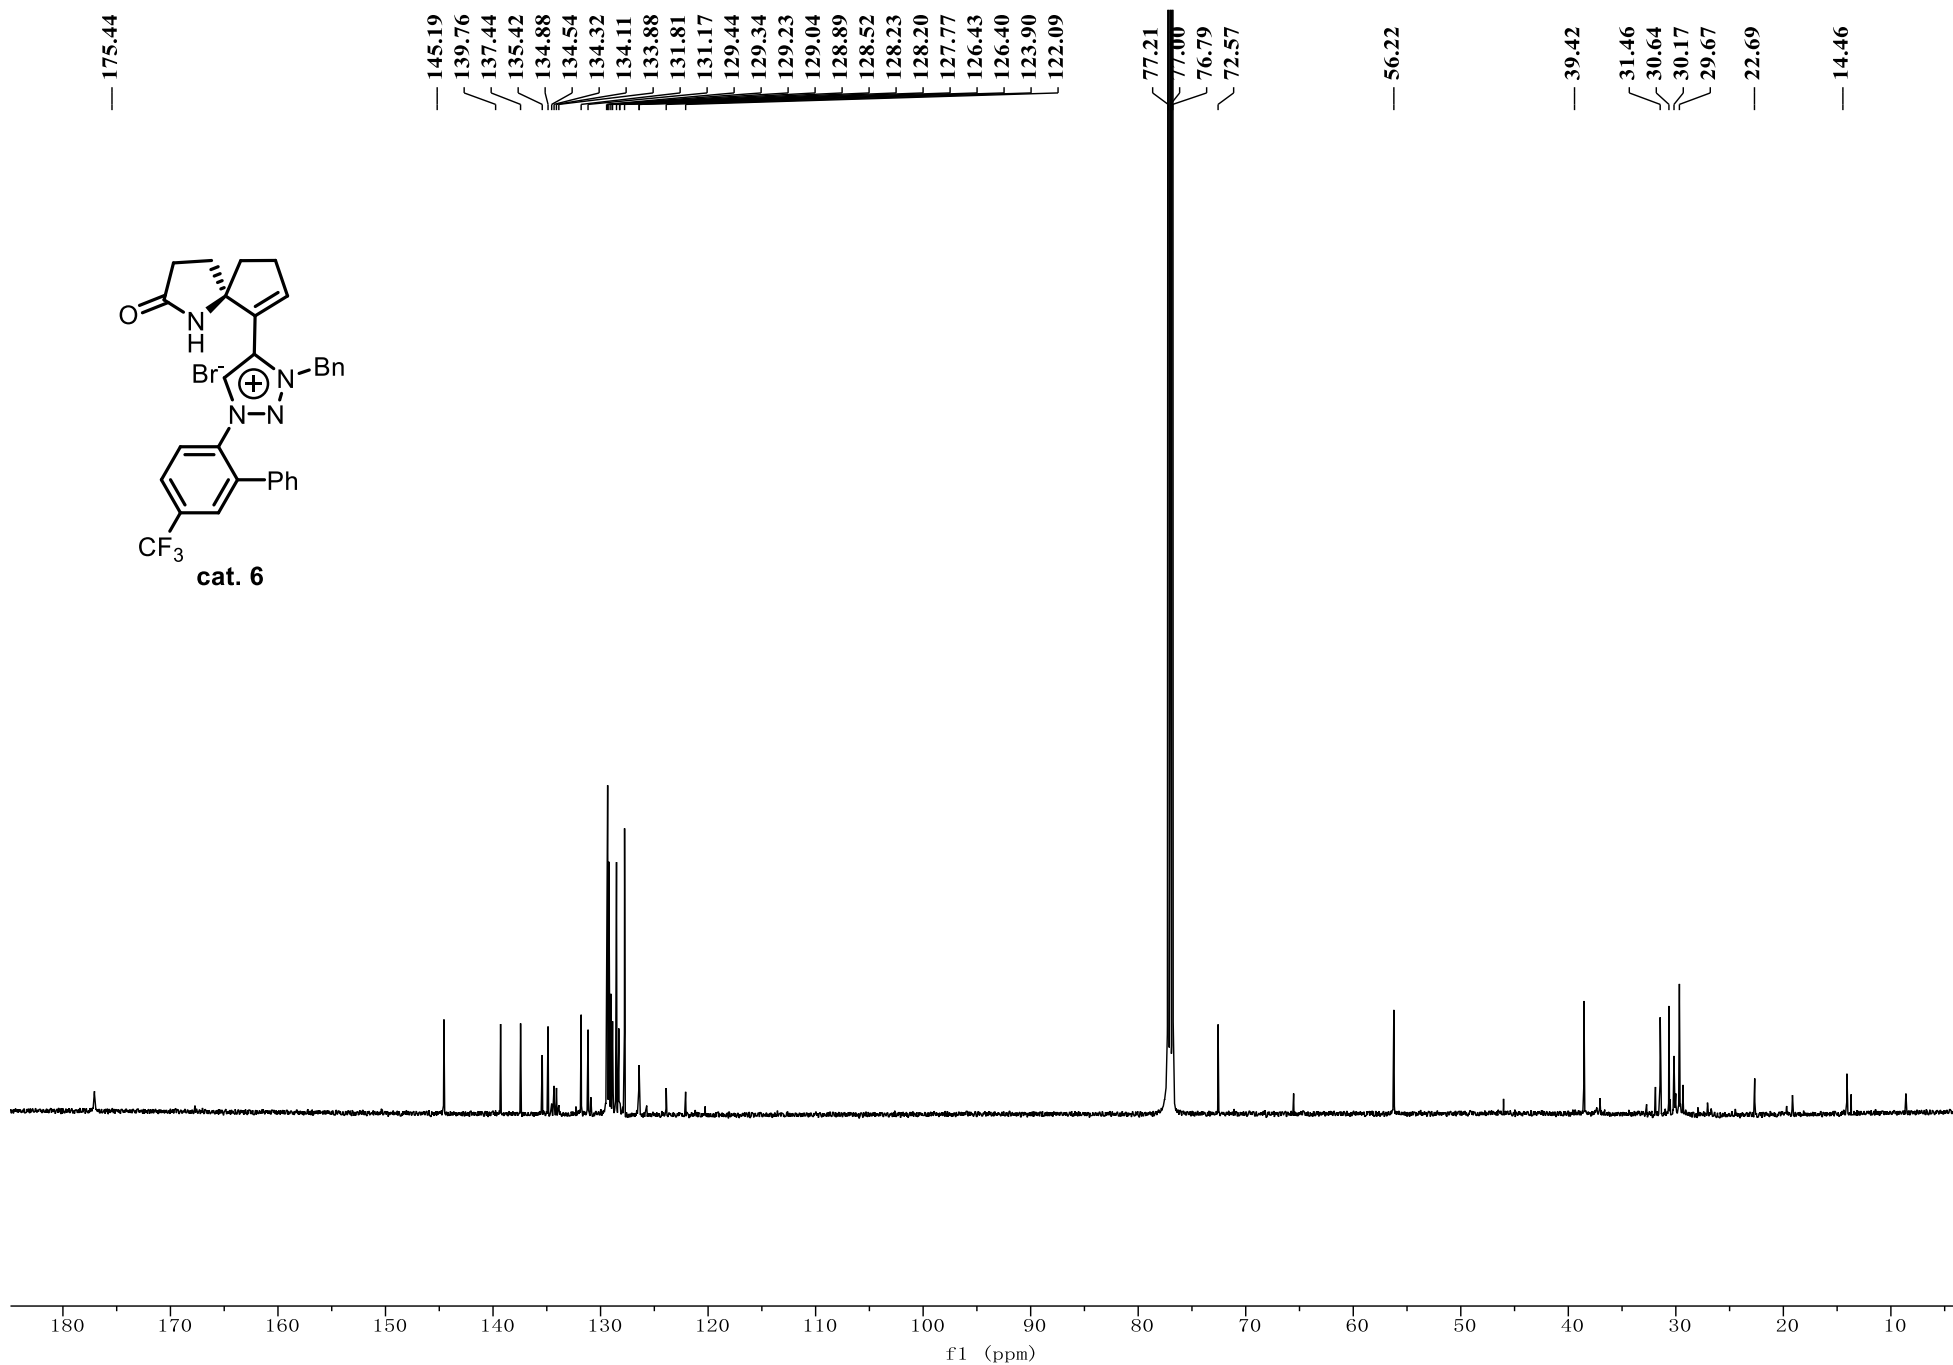

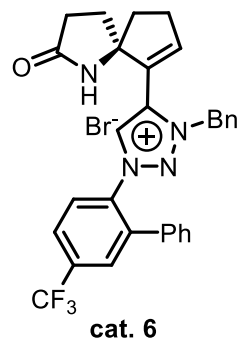

— -62.90

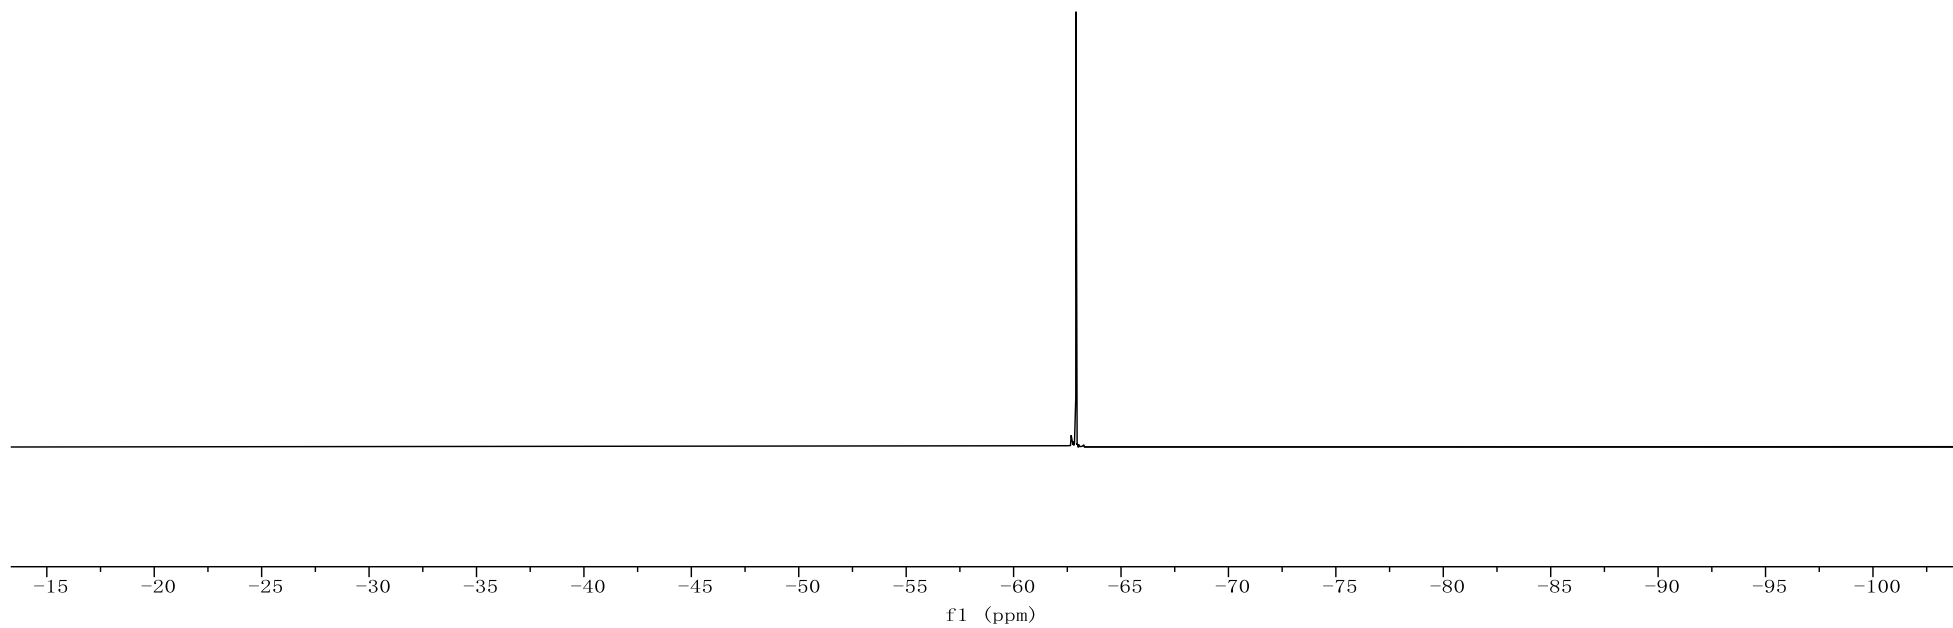

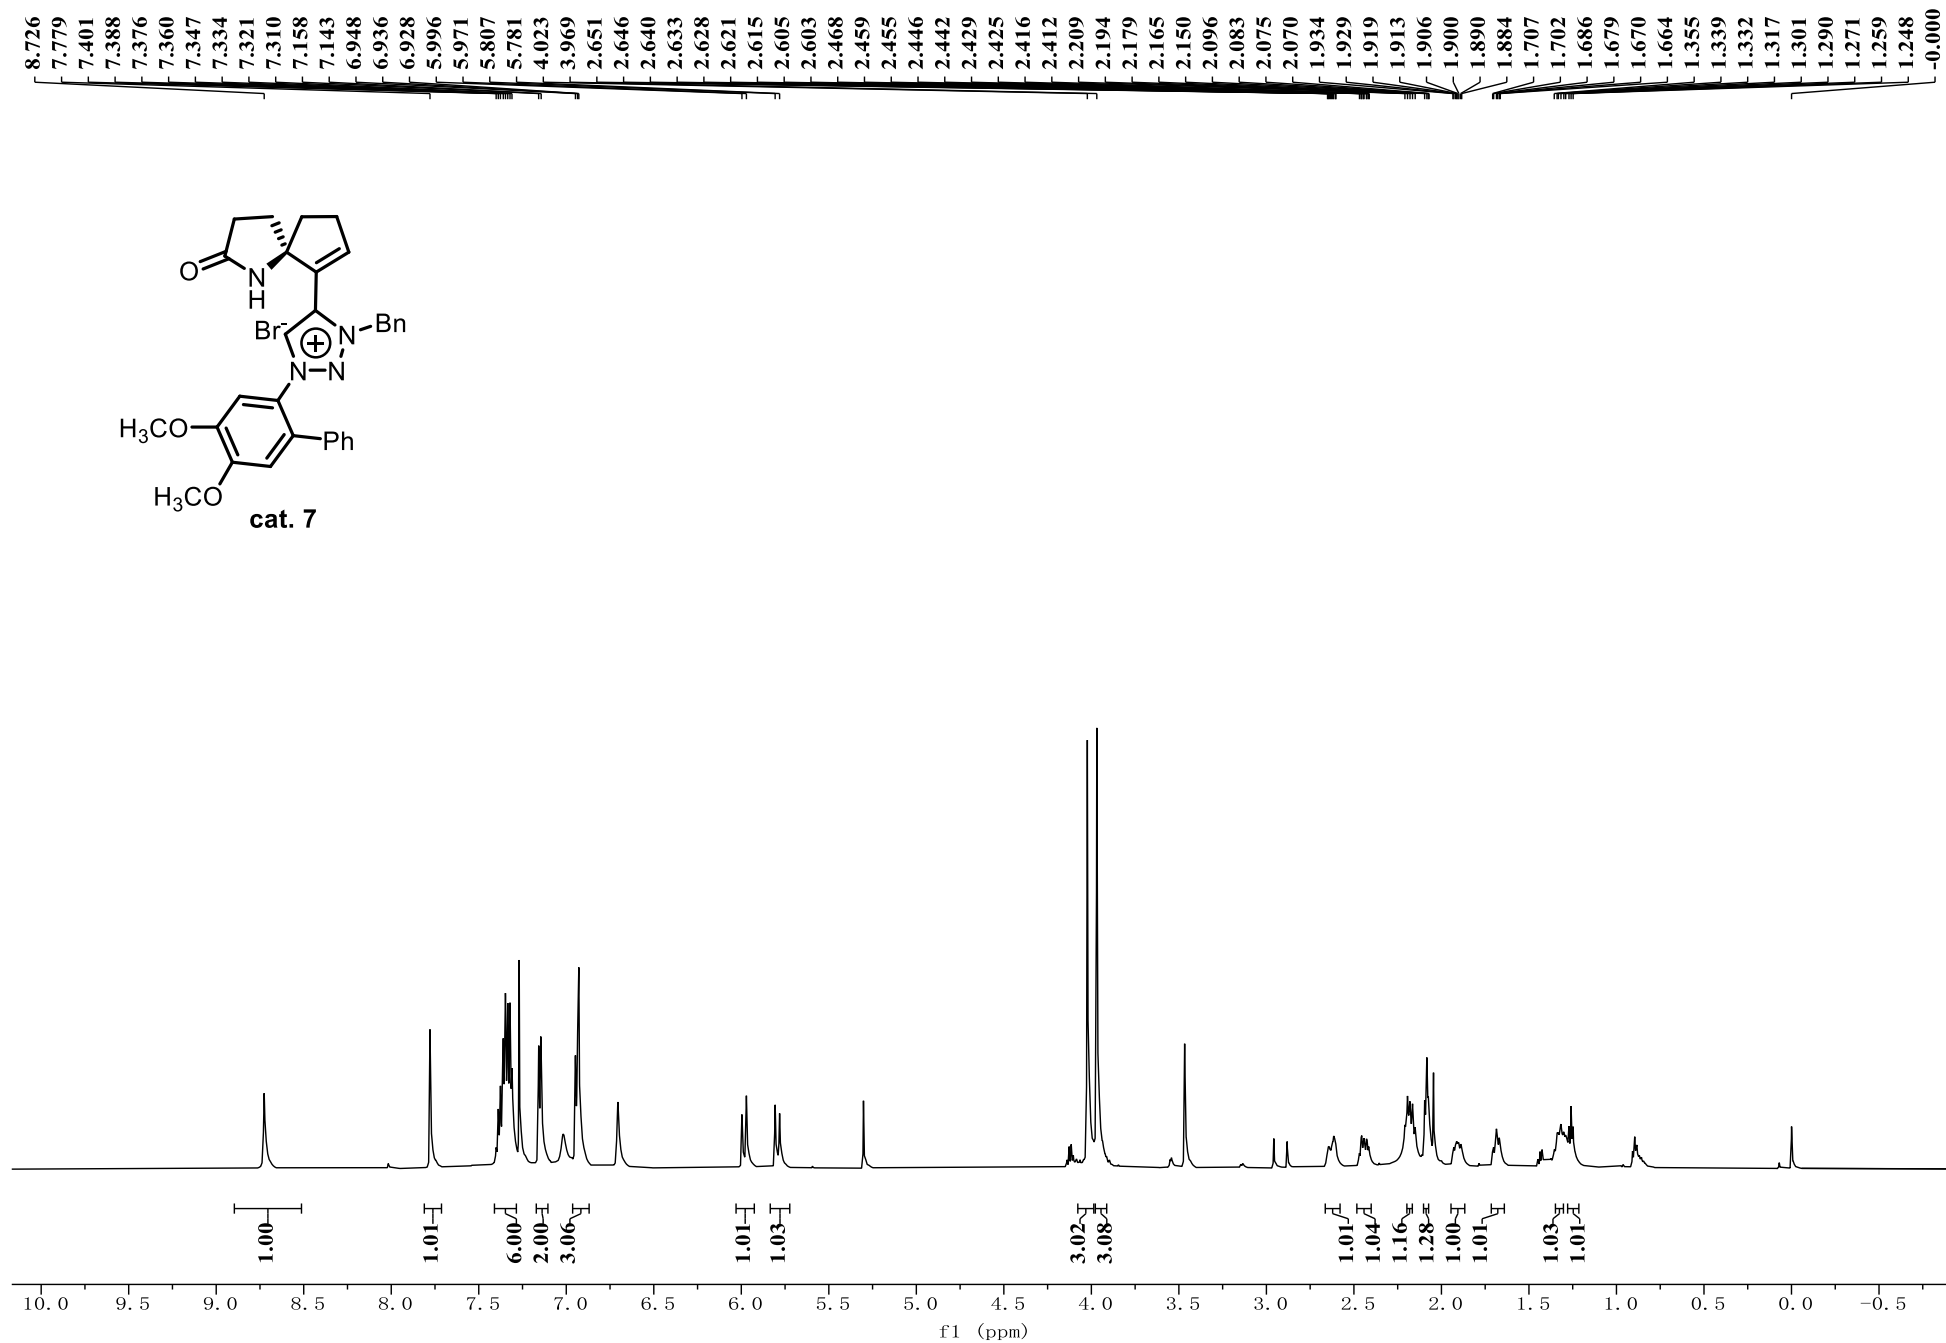

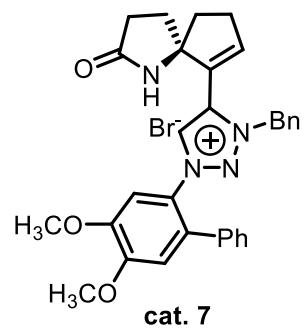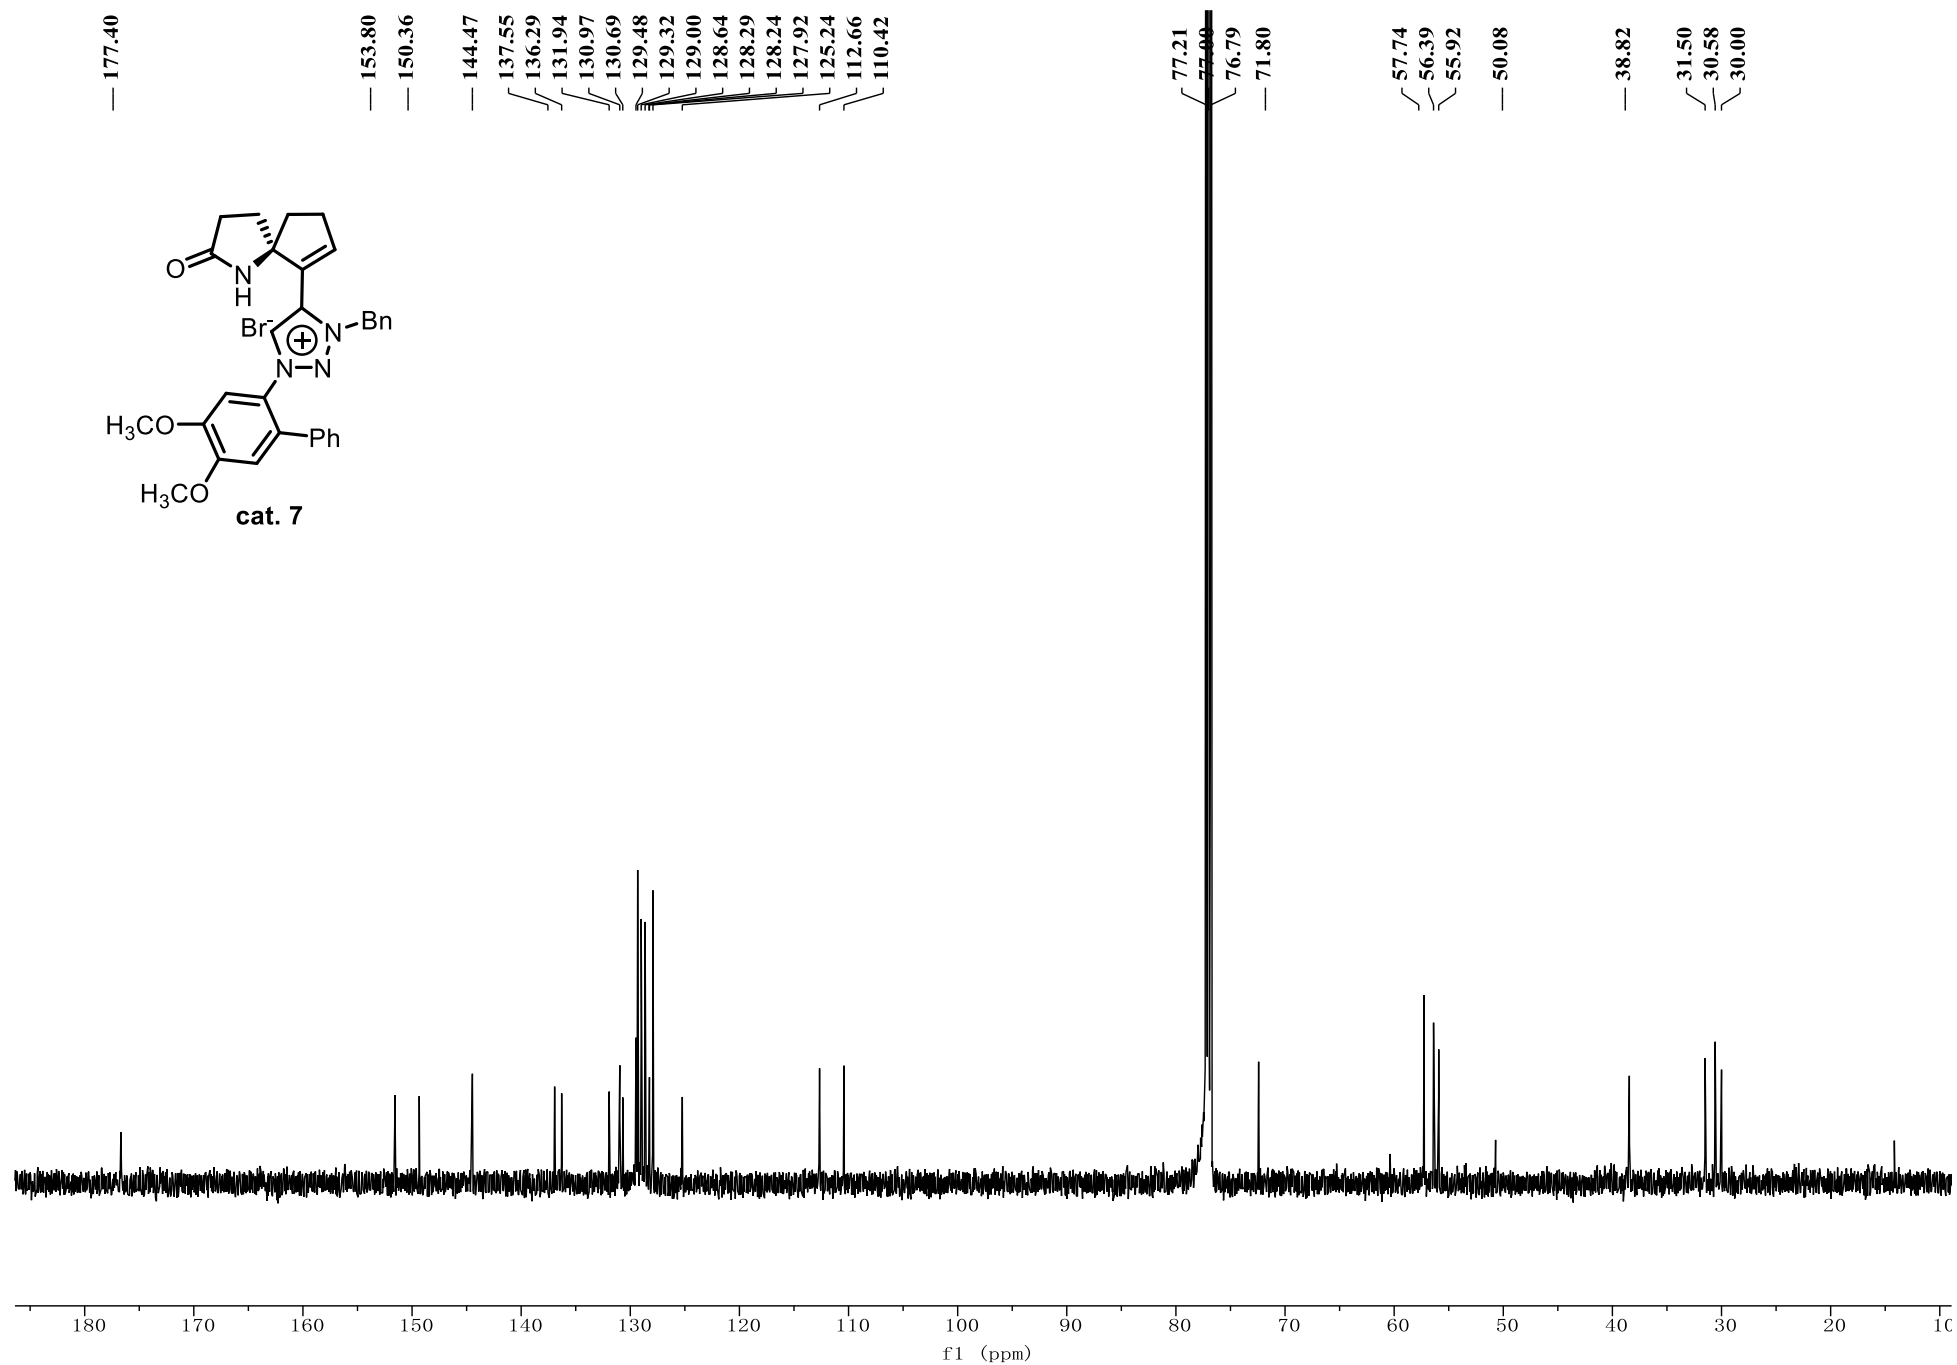

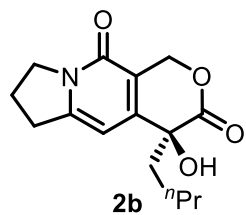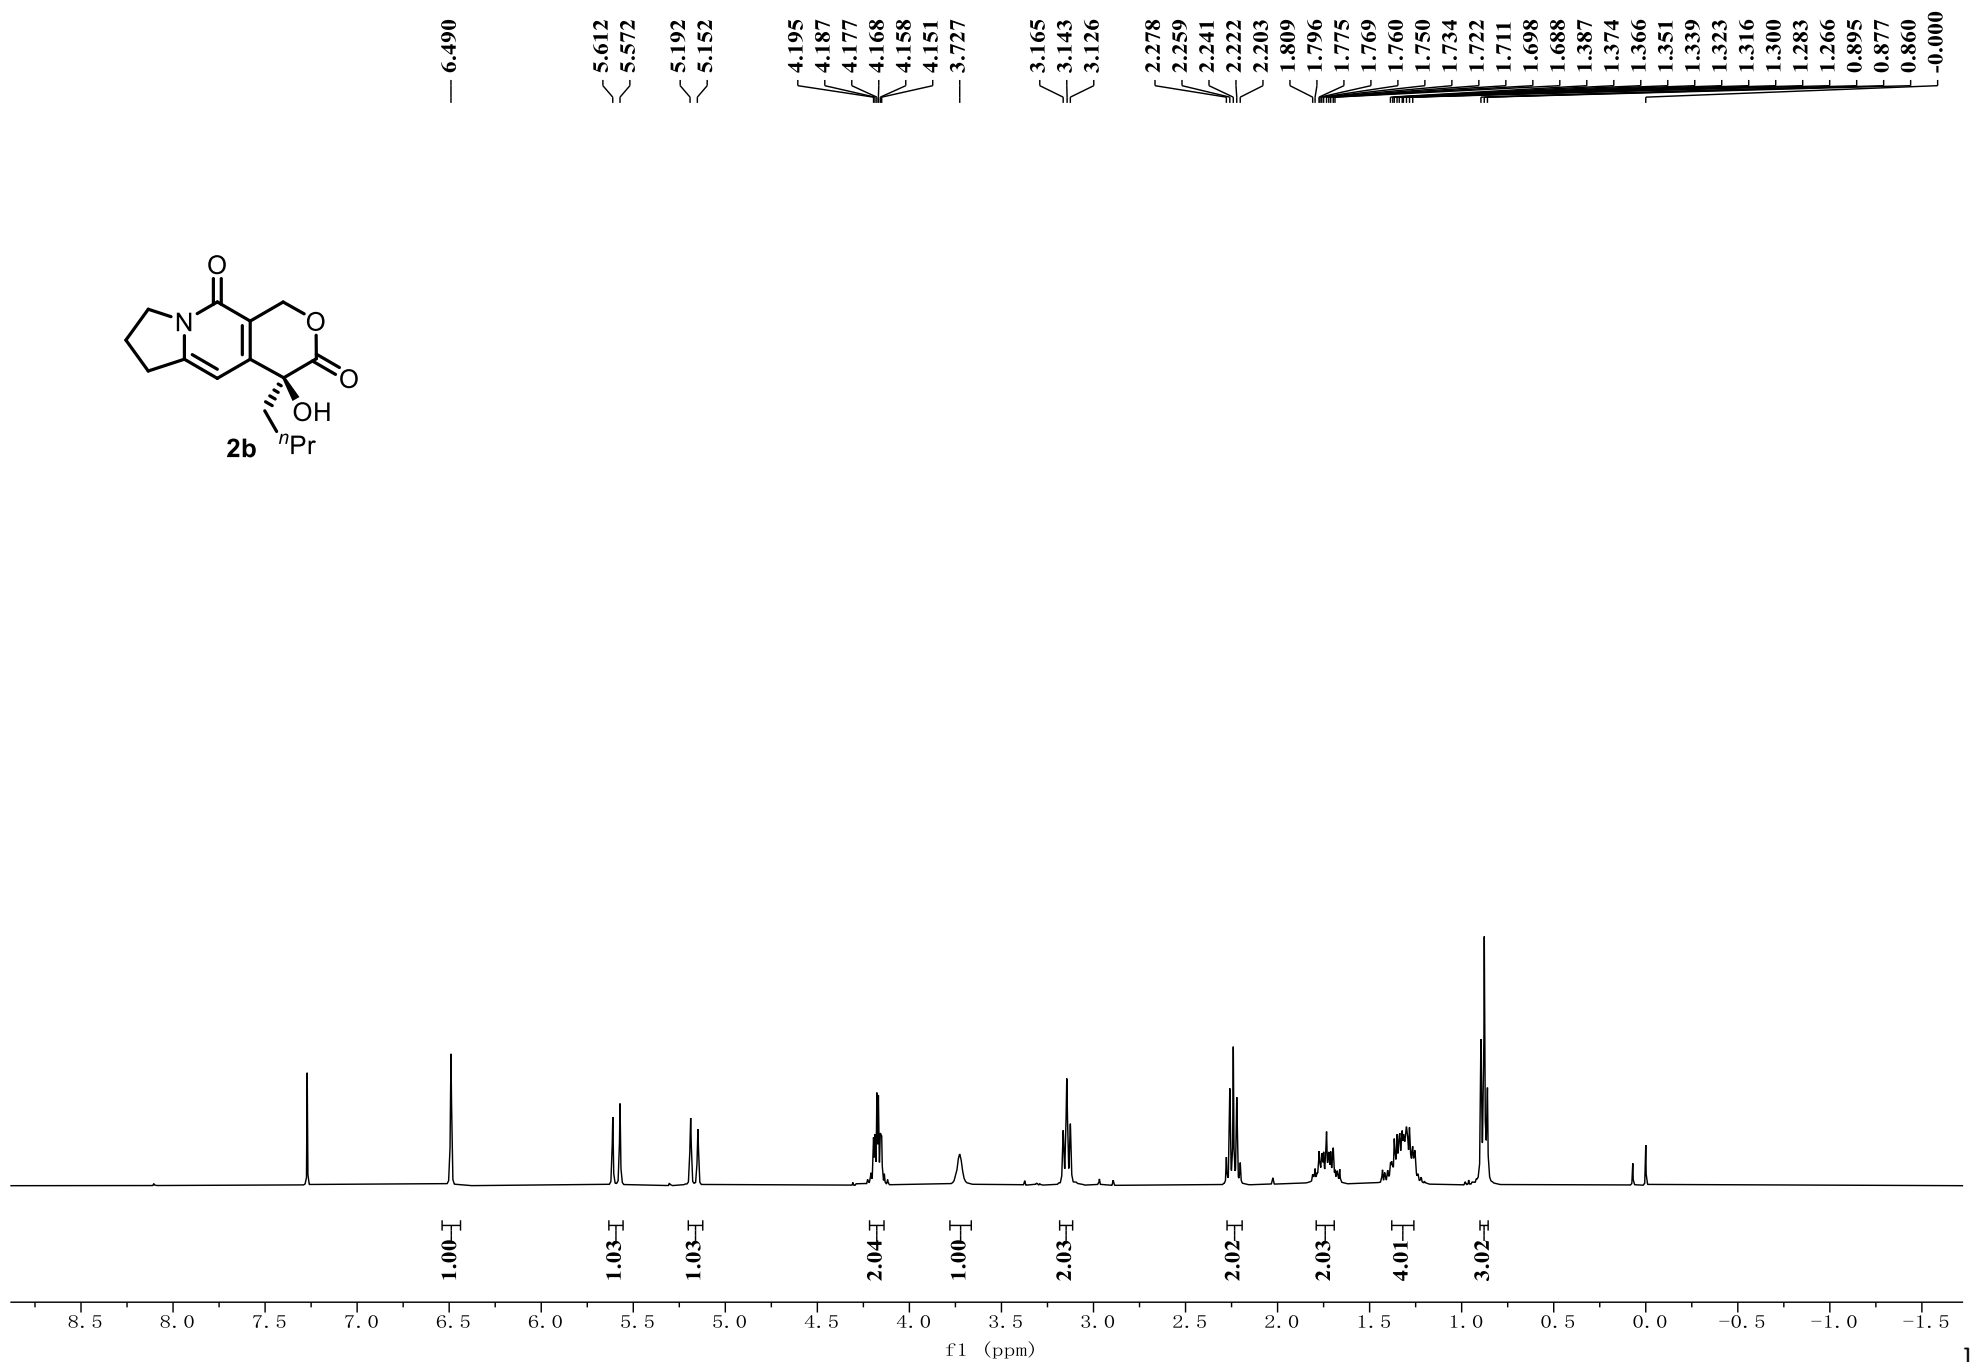

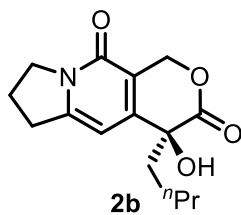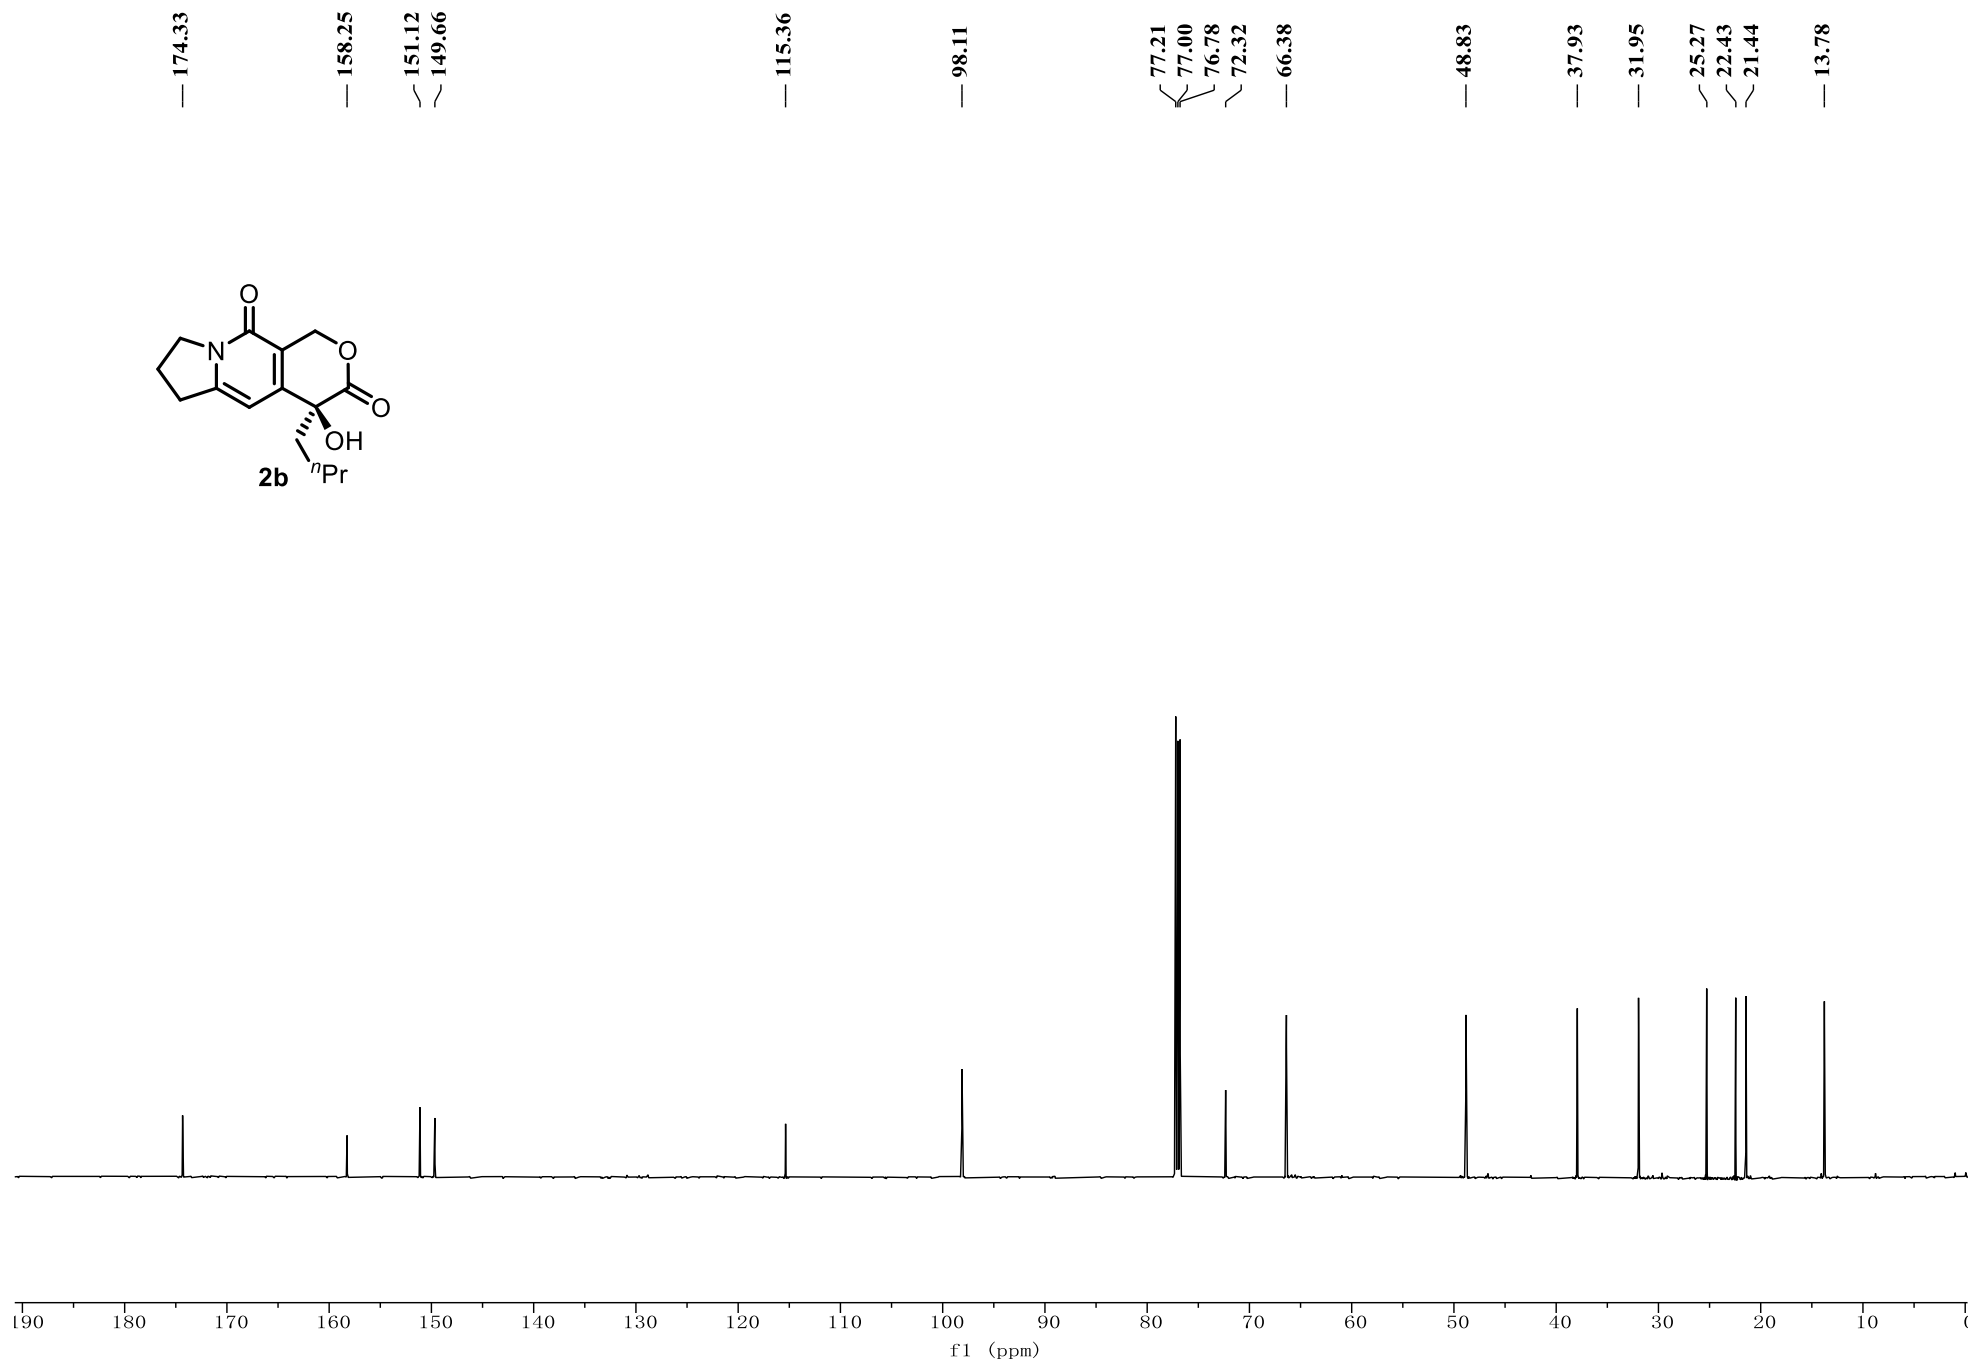

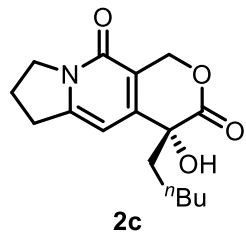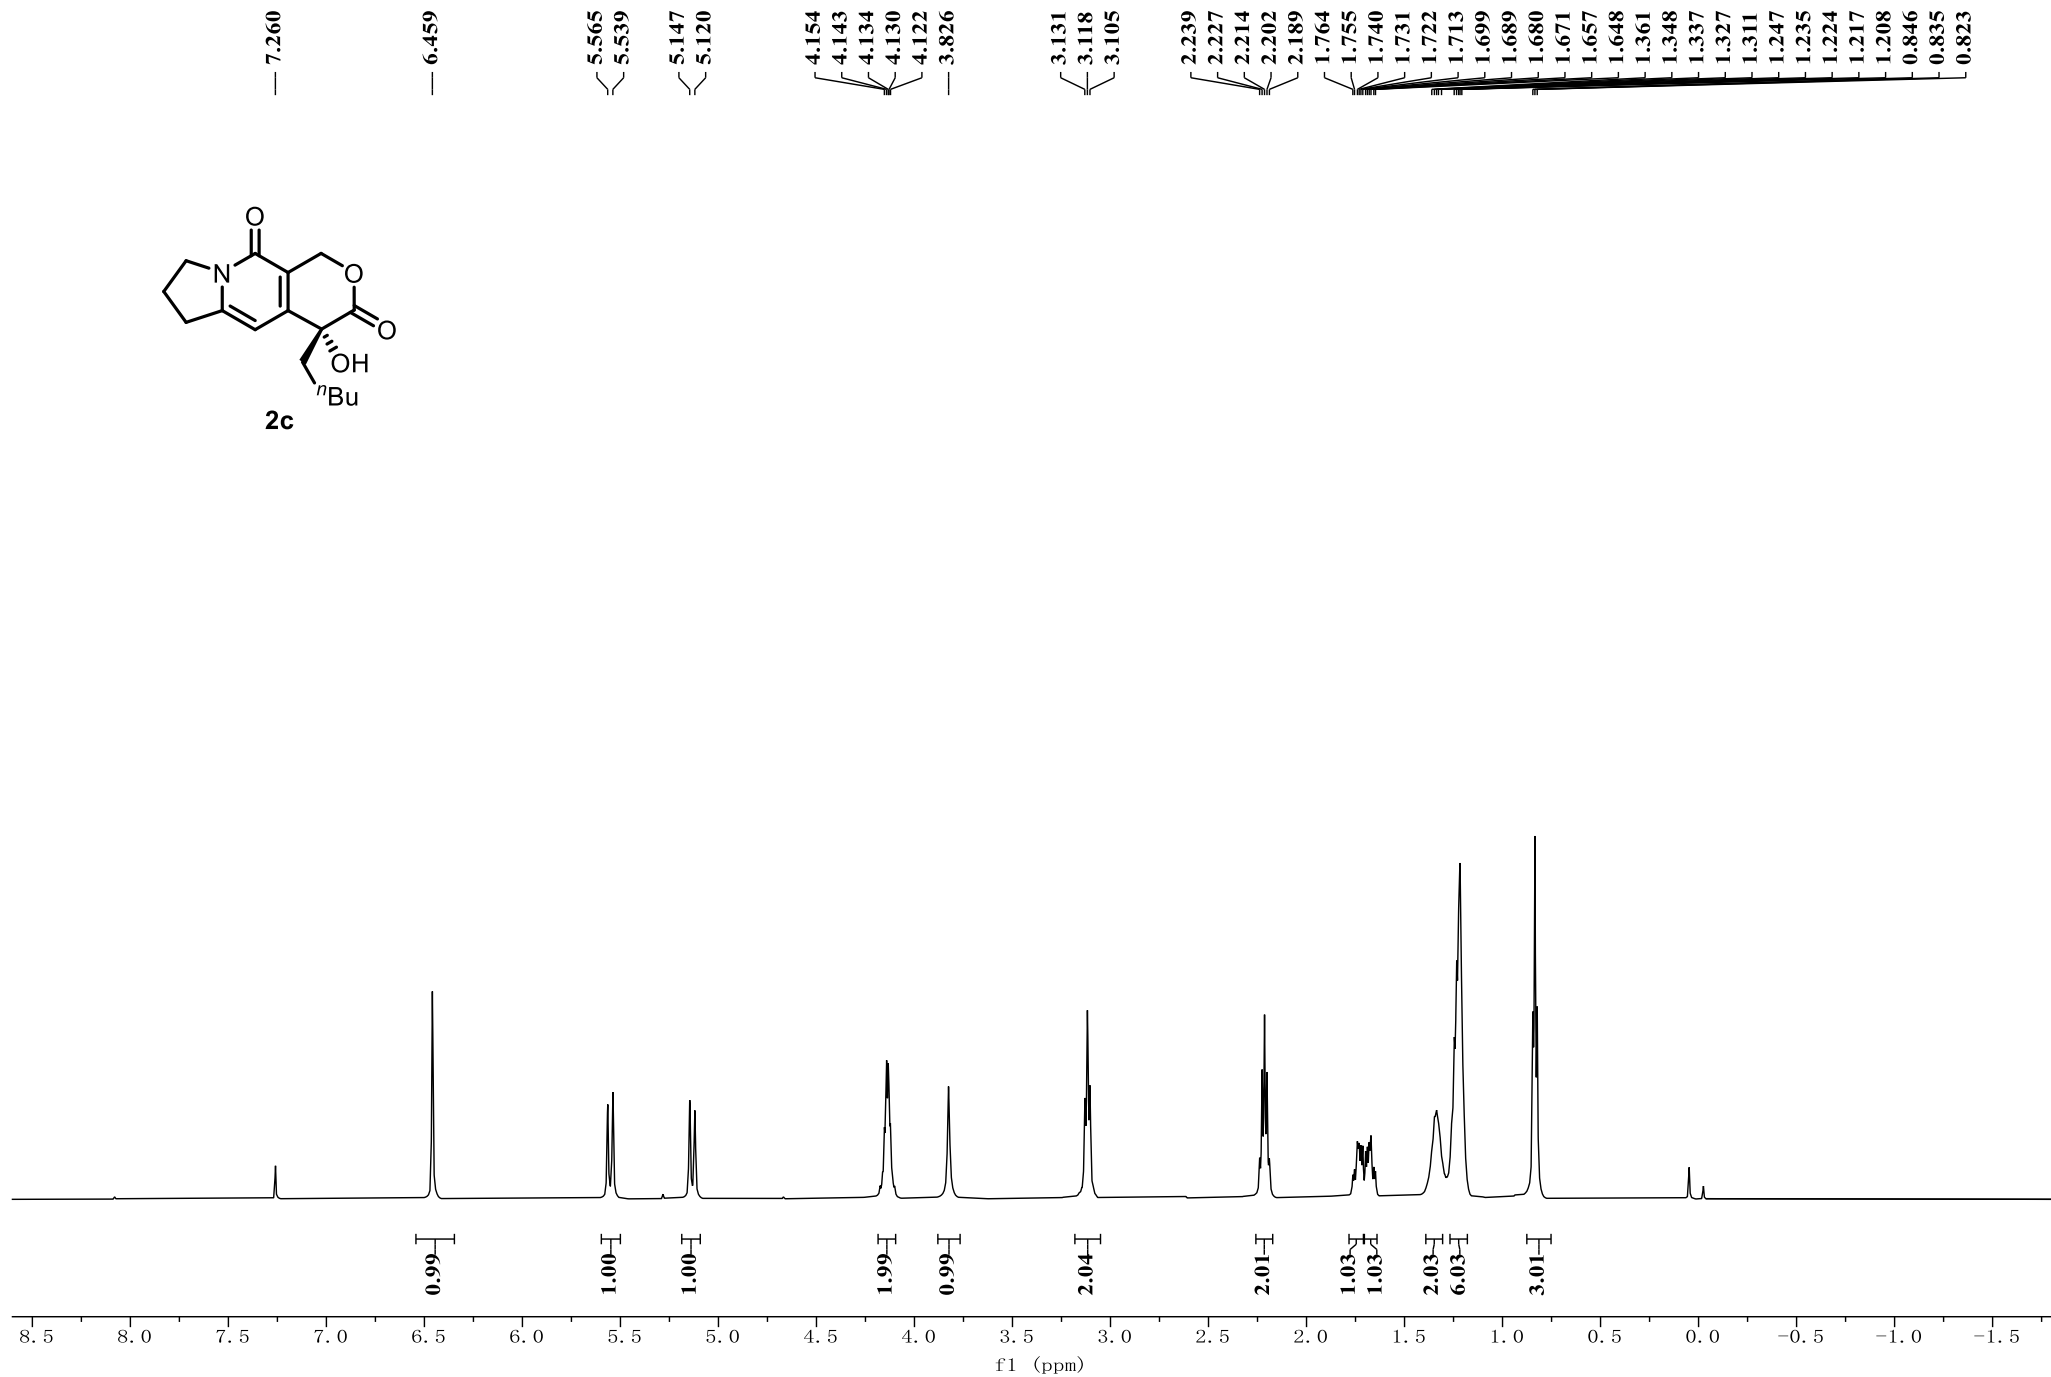

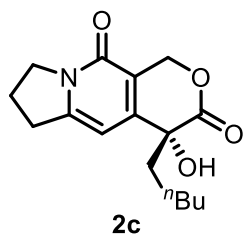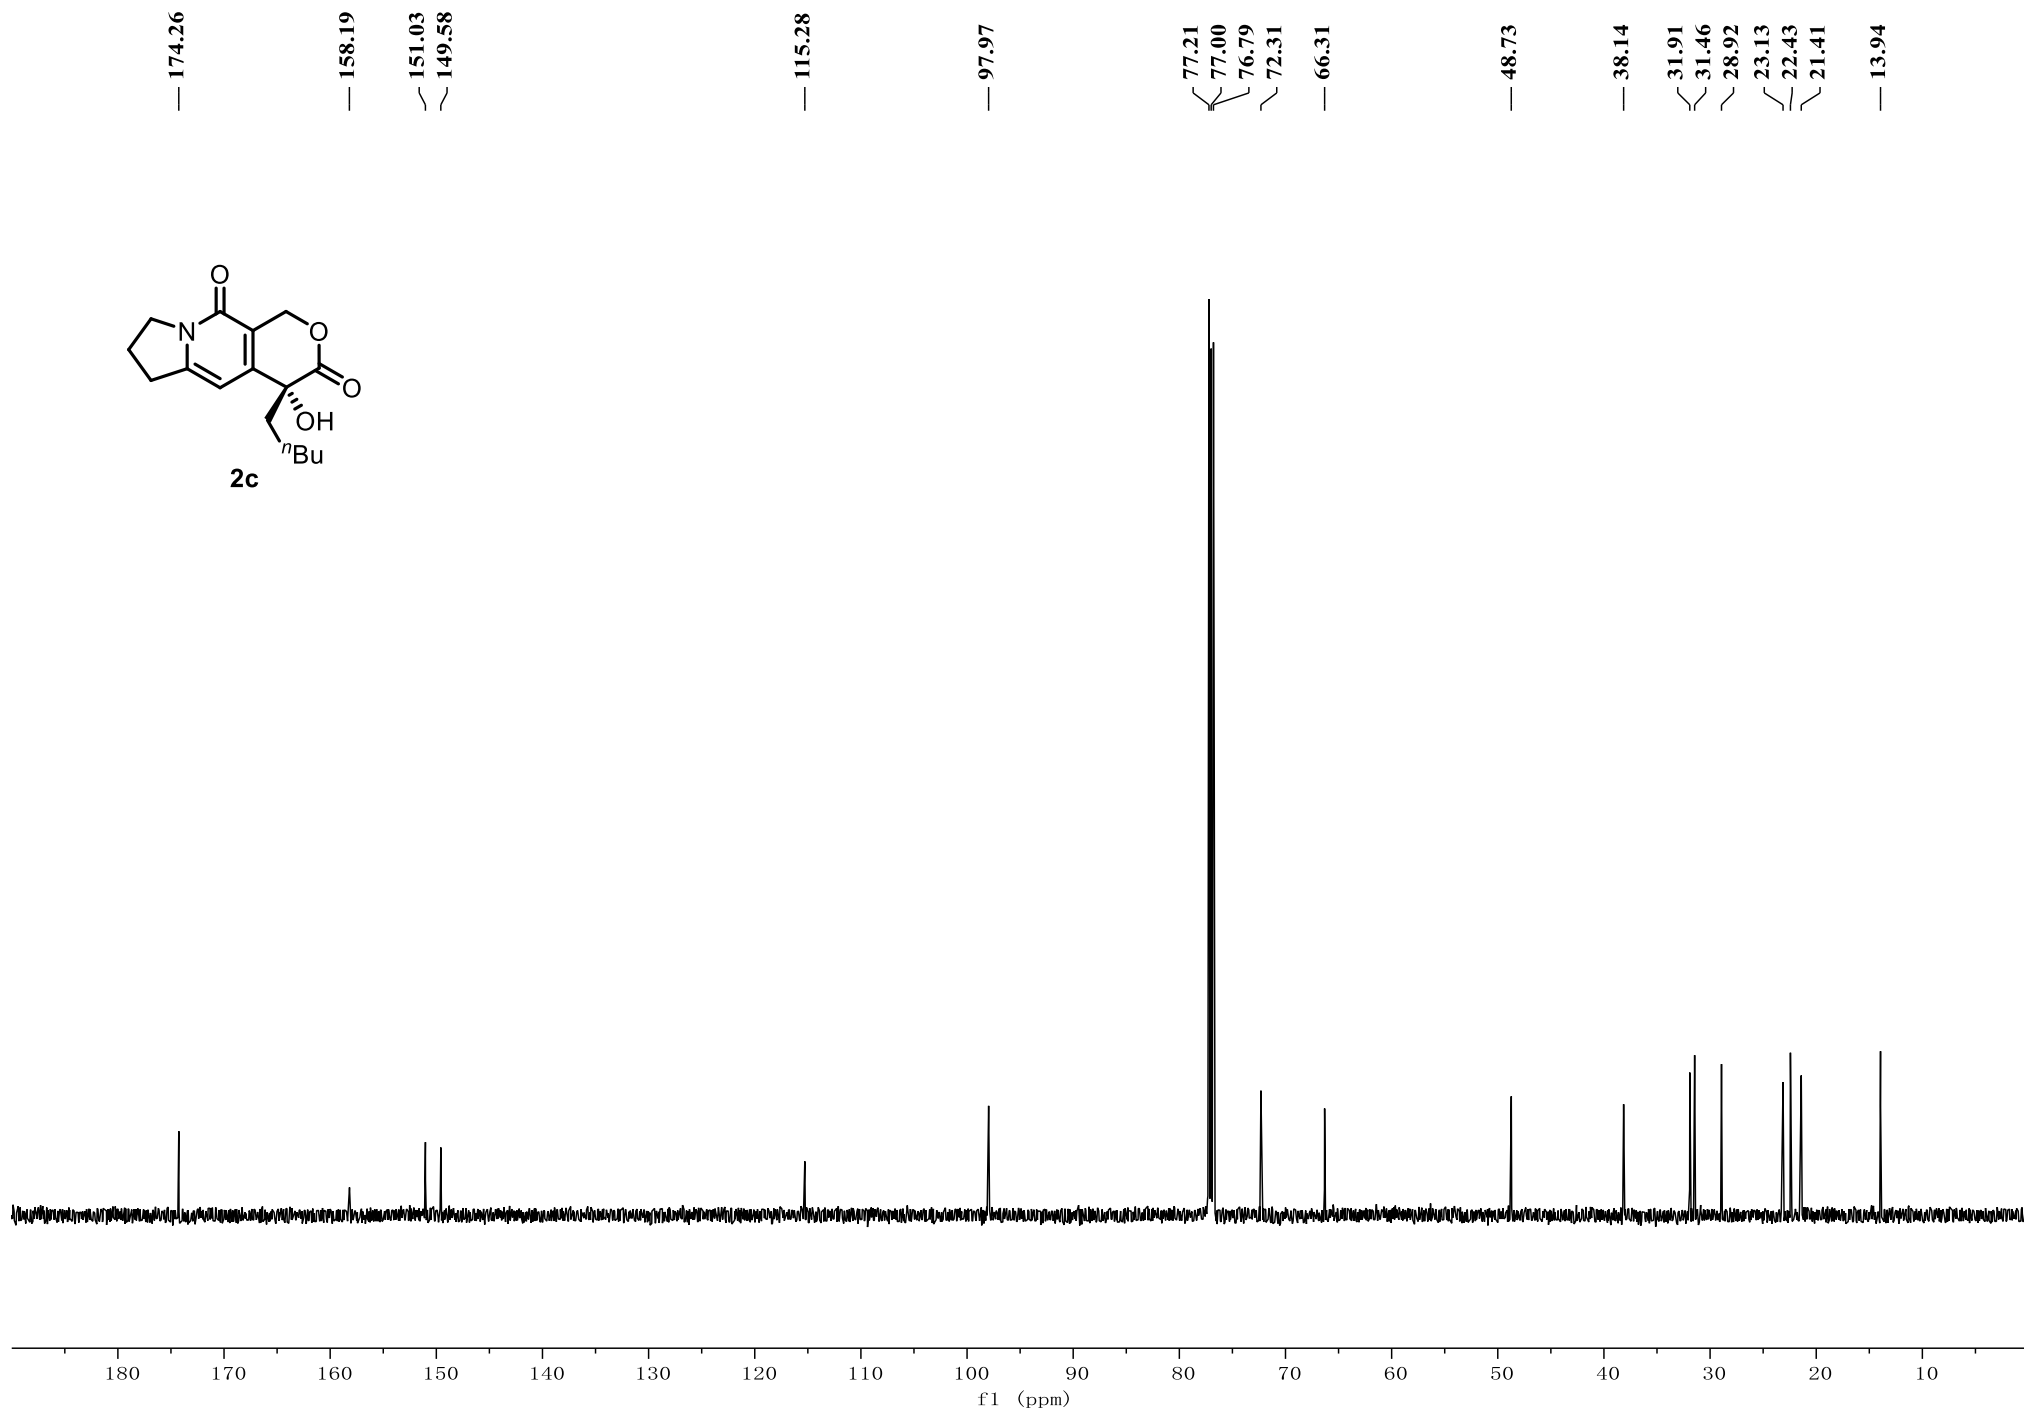

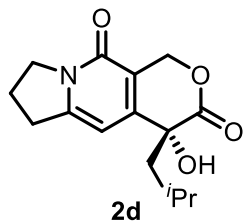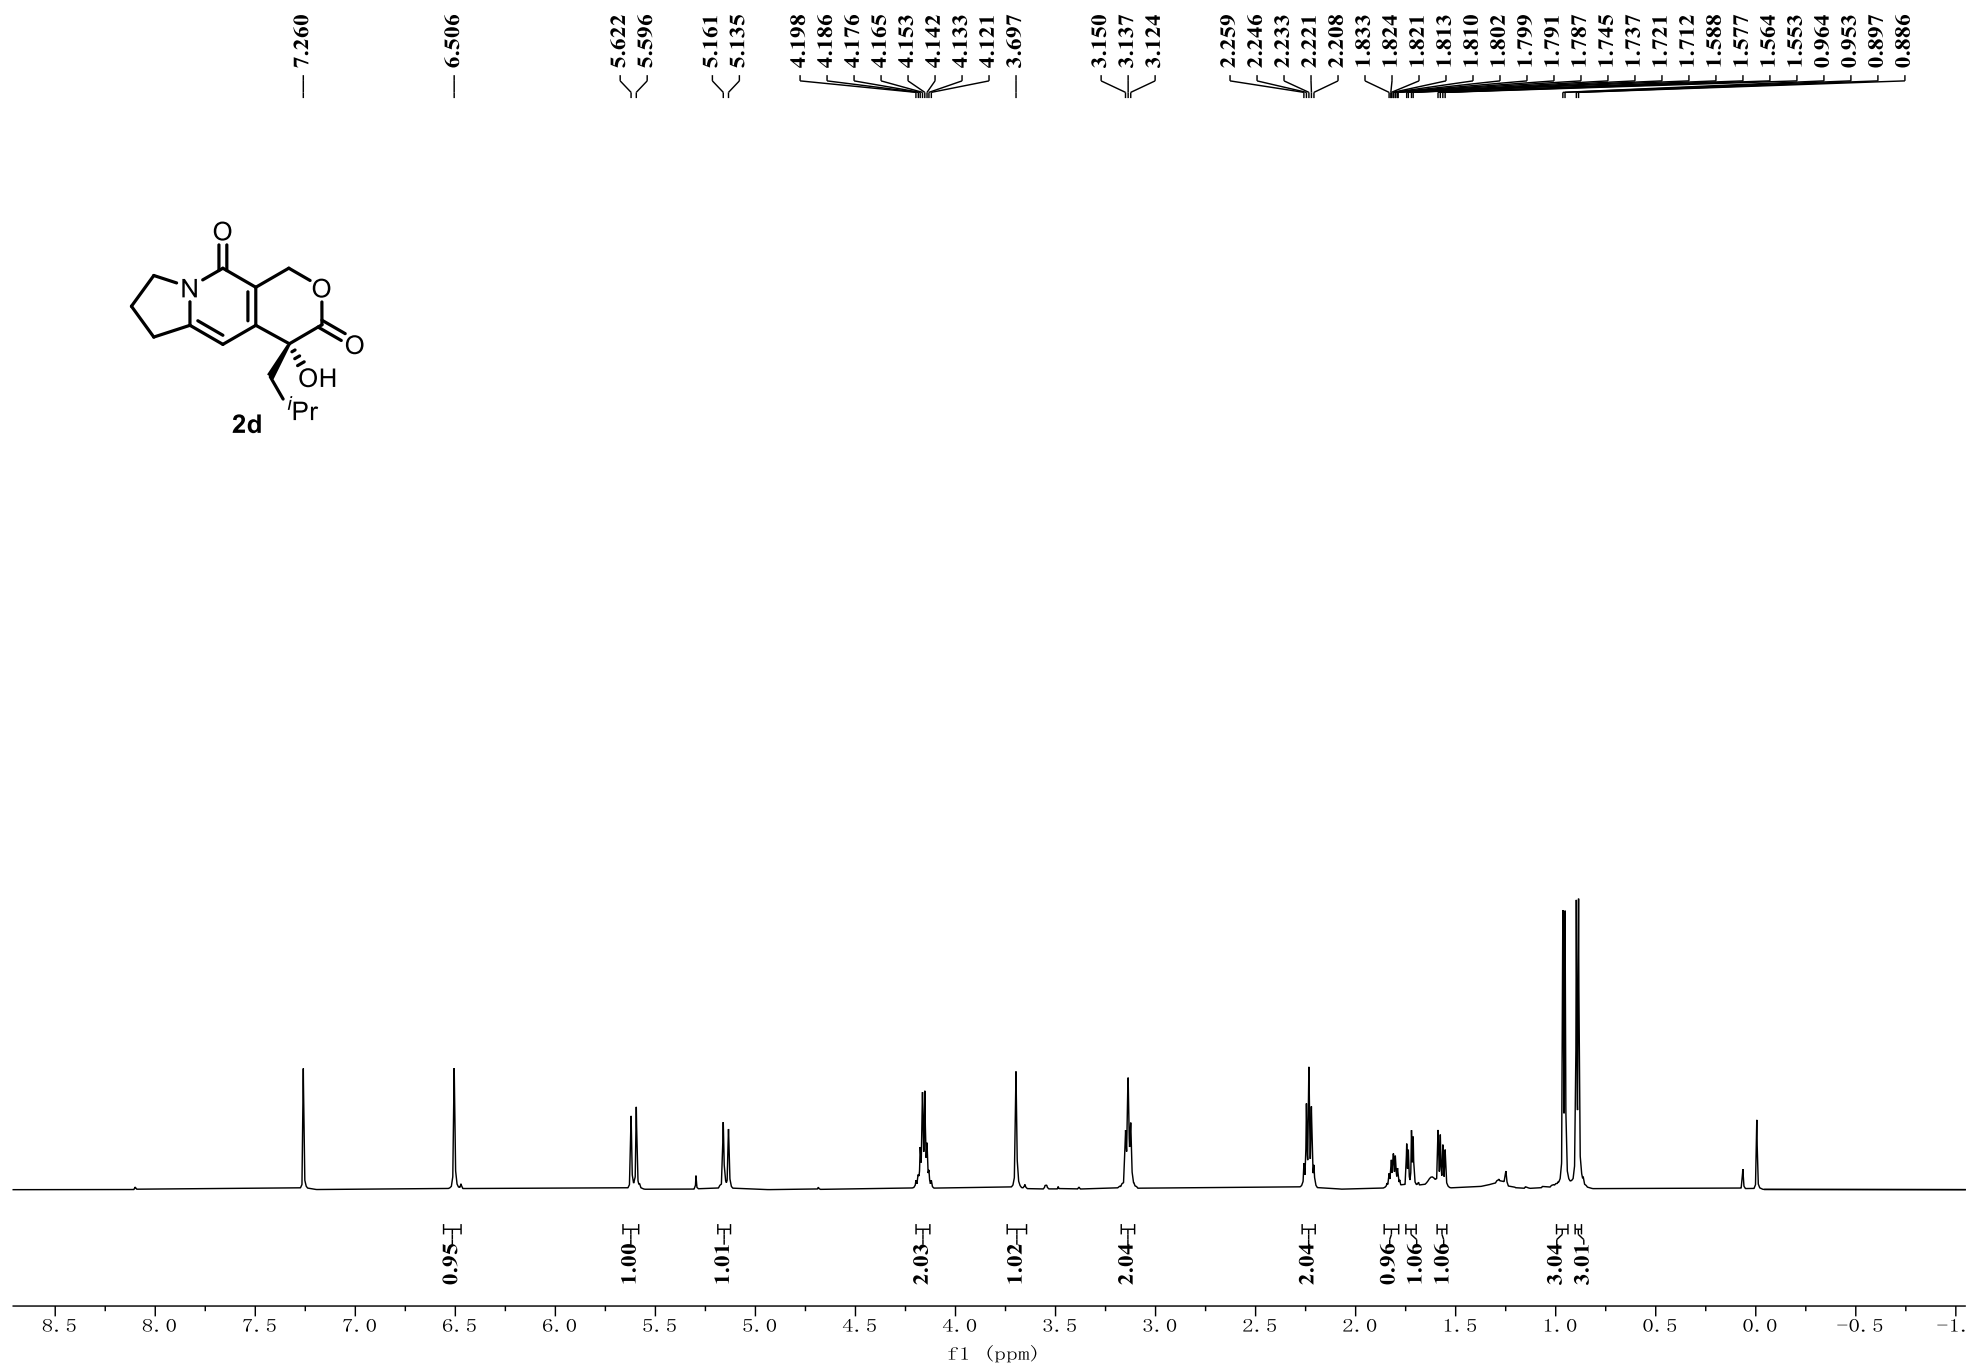

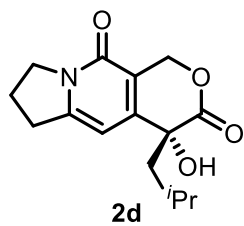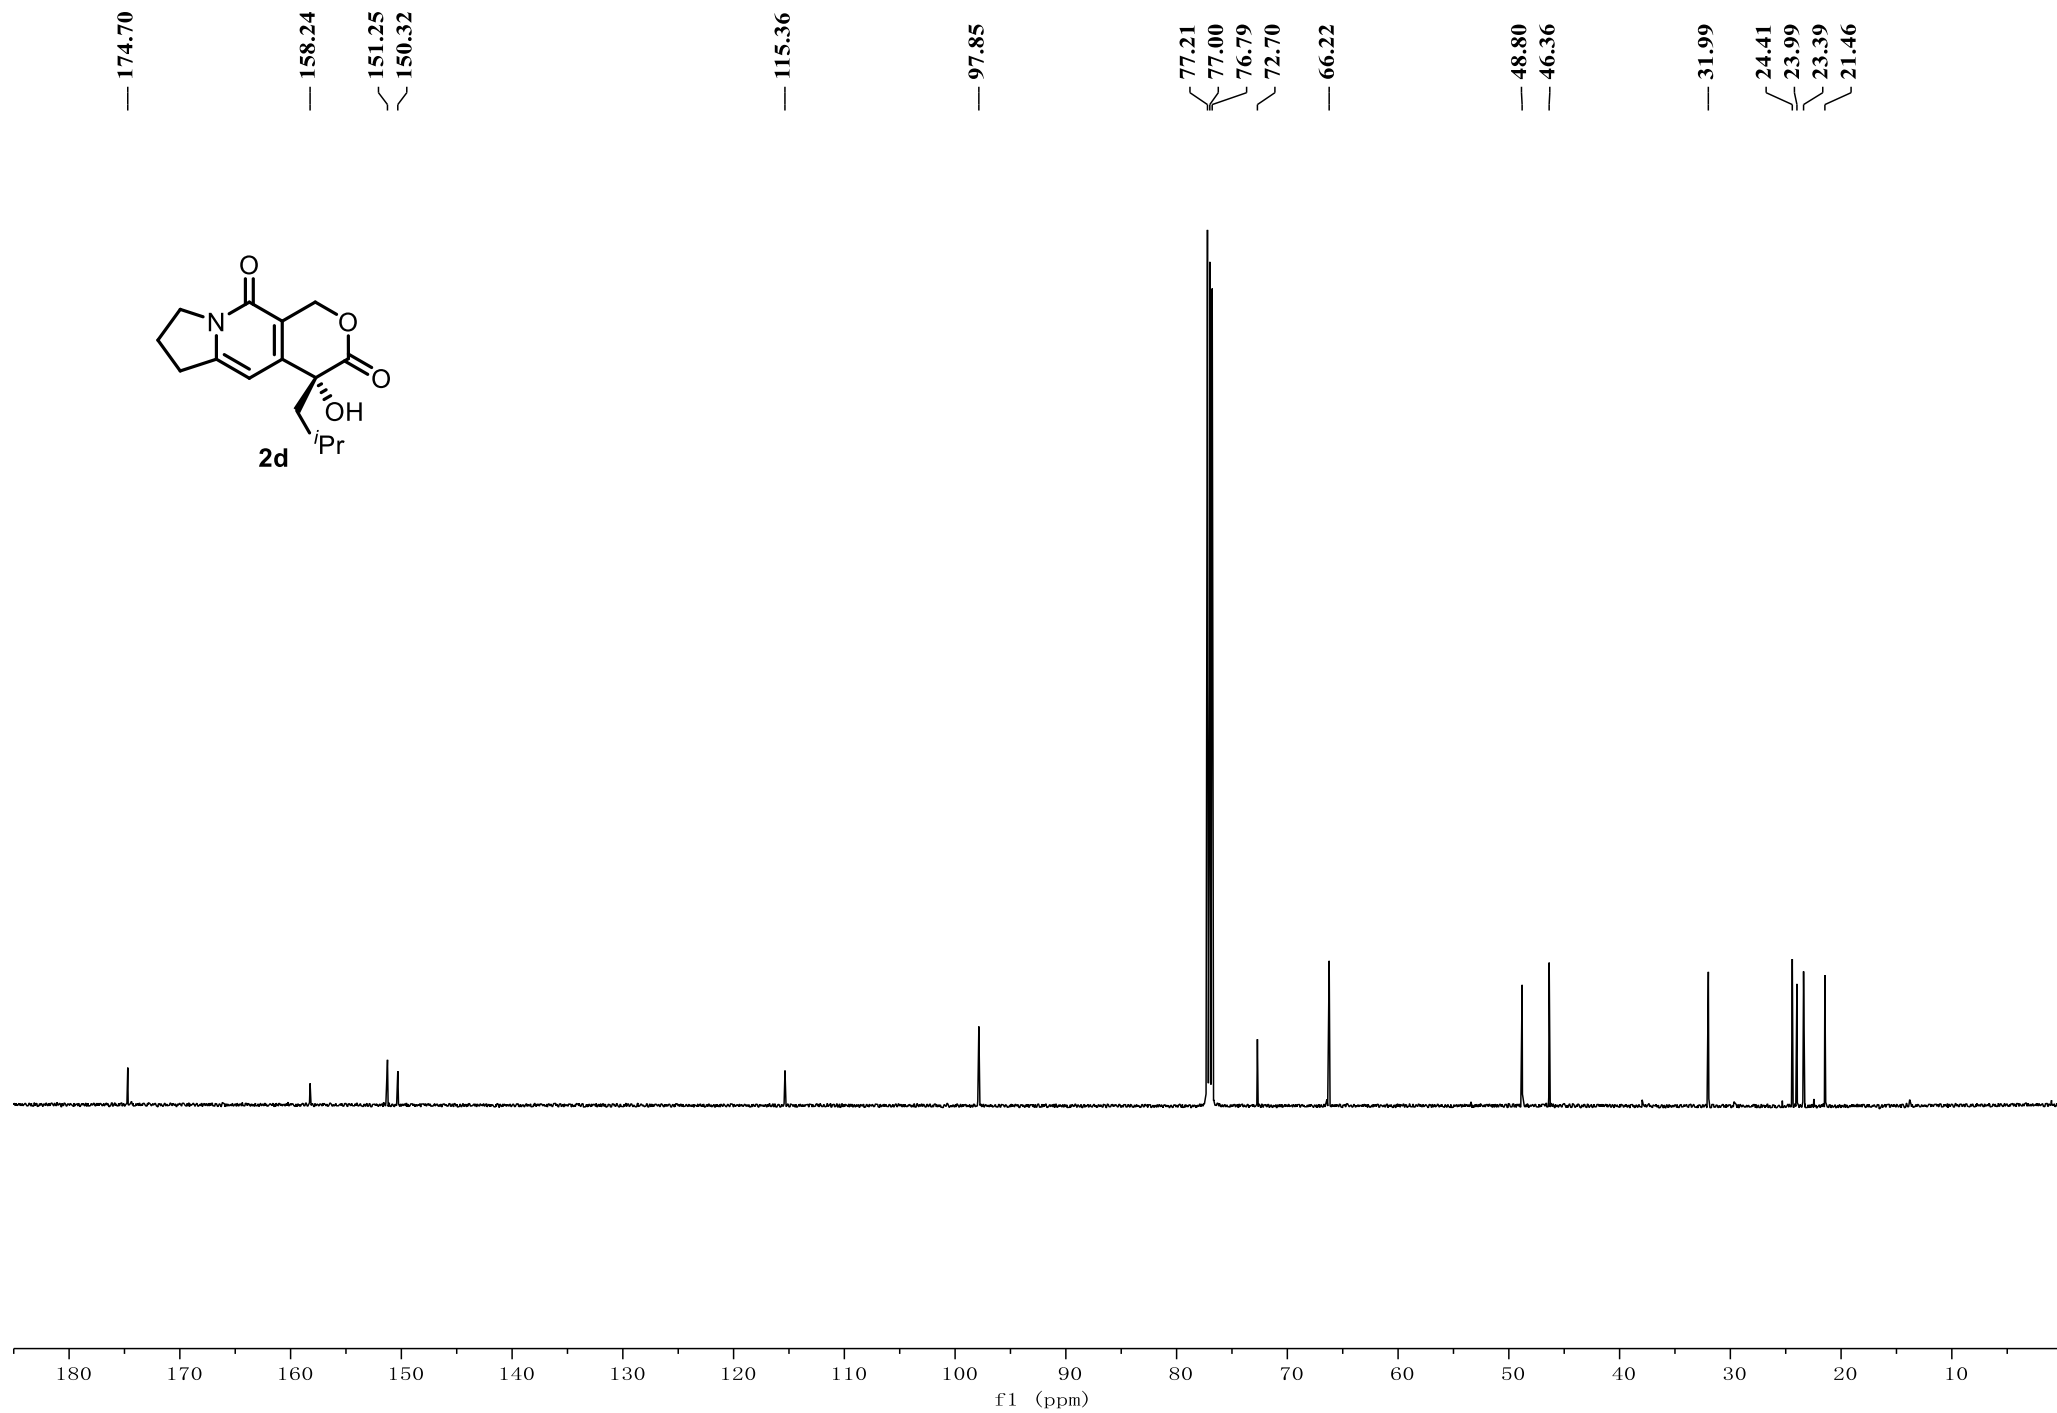

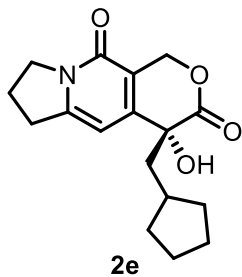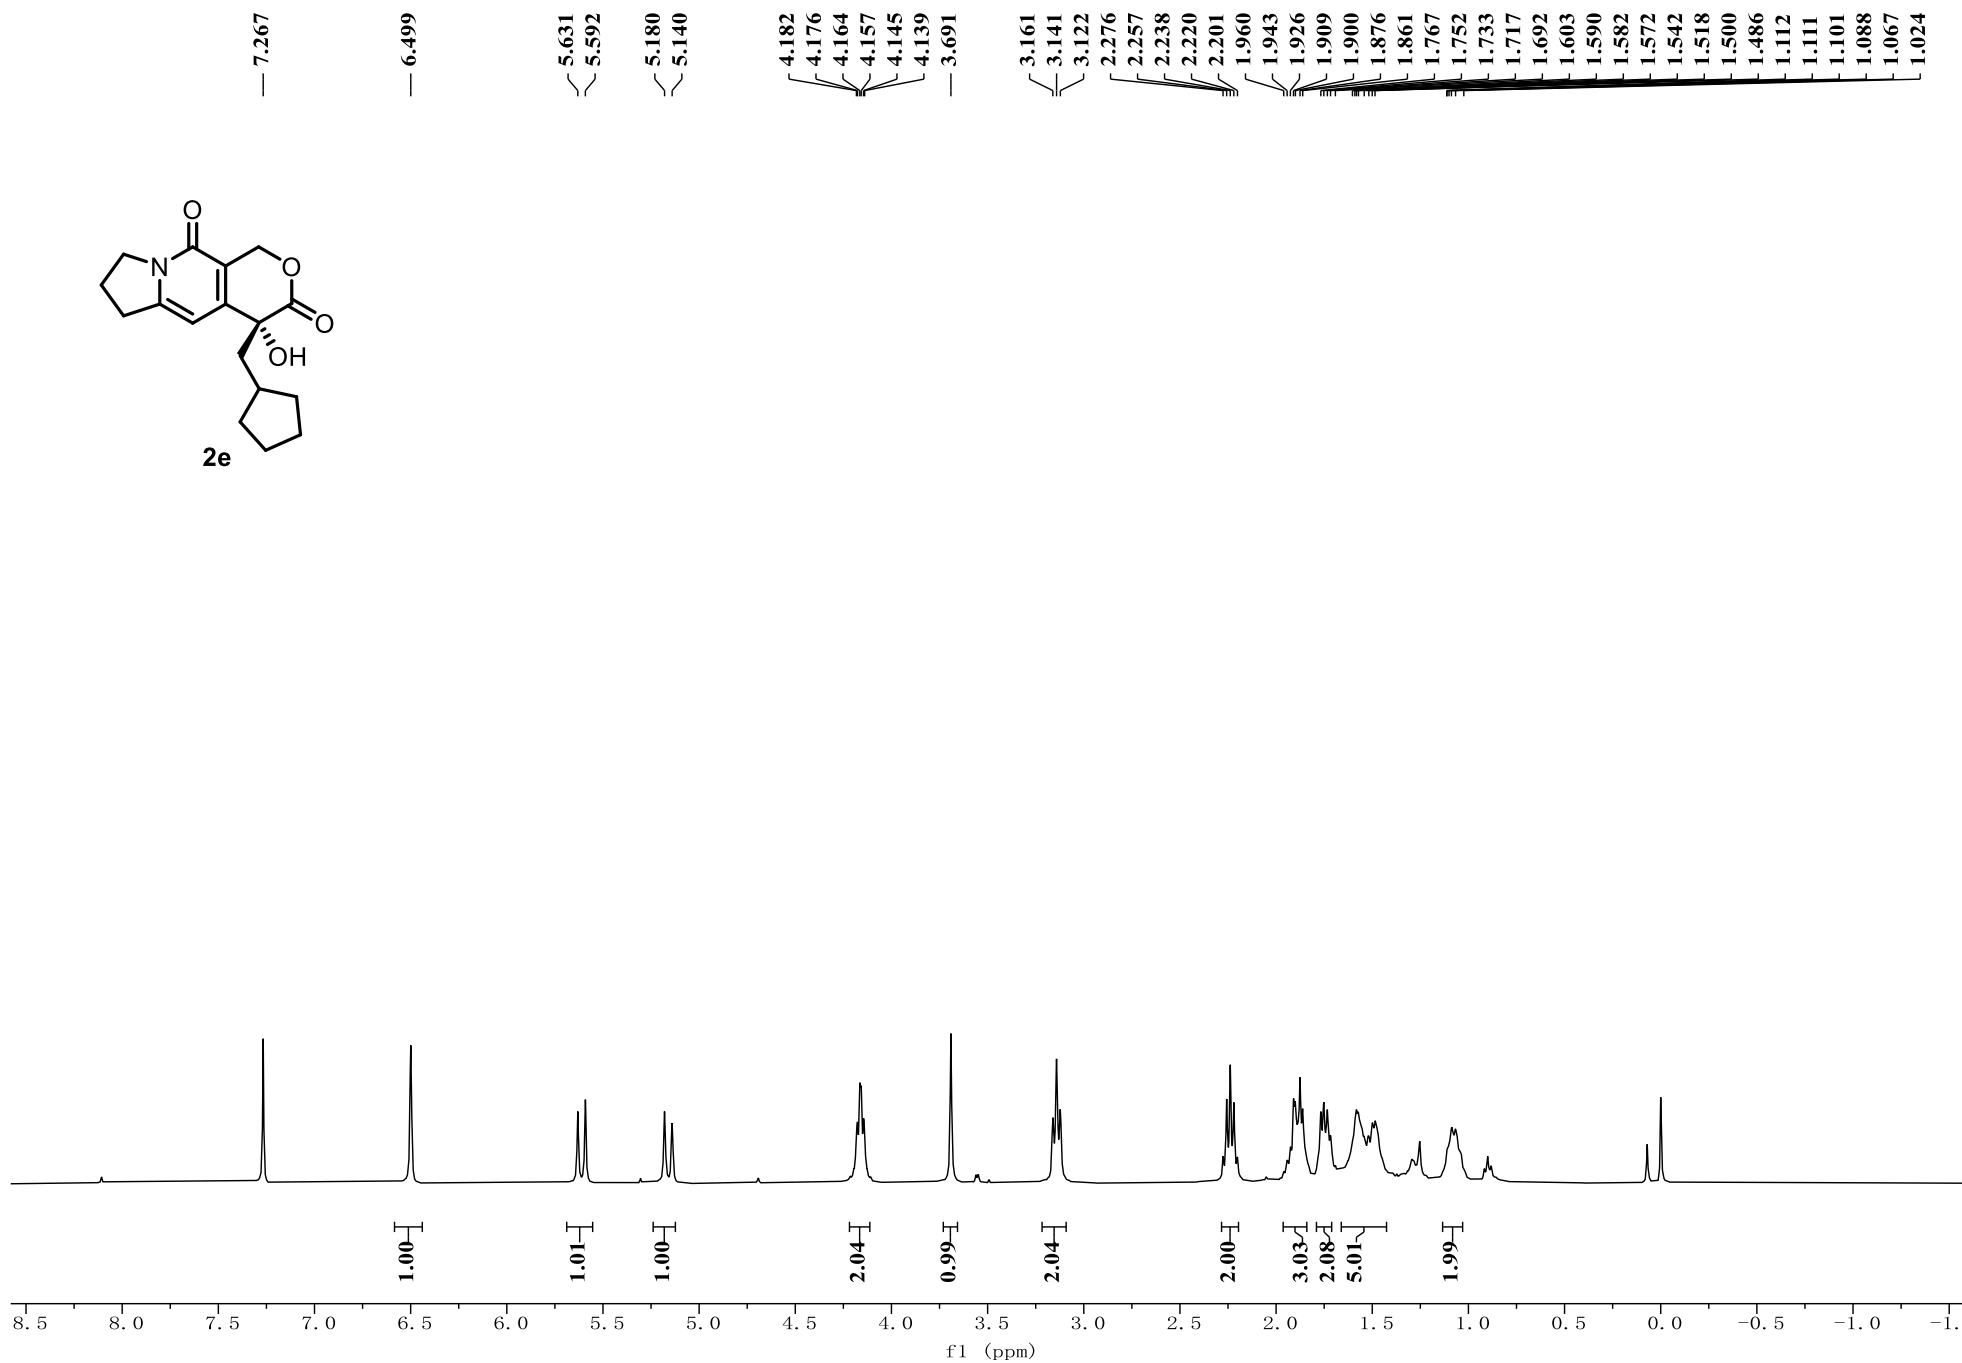

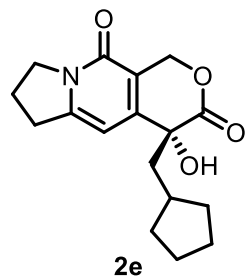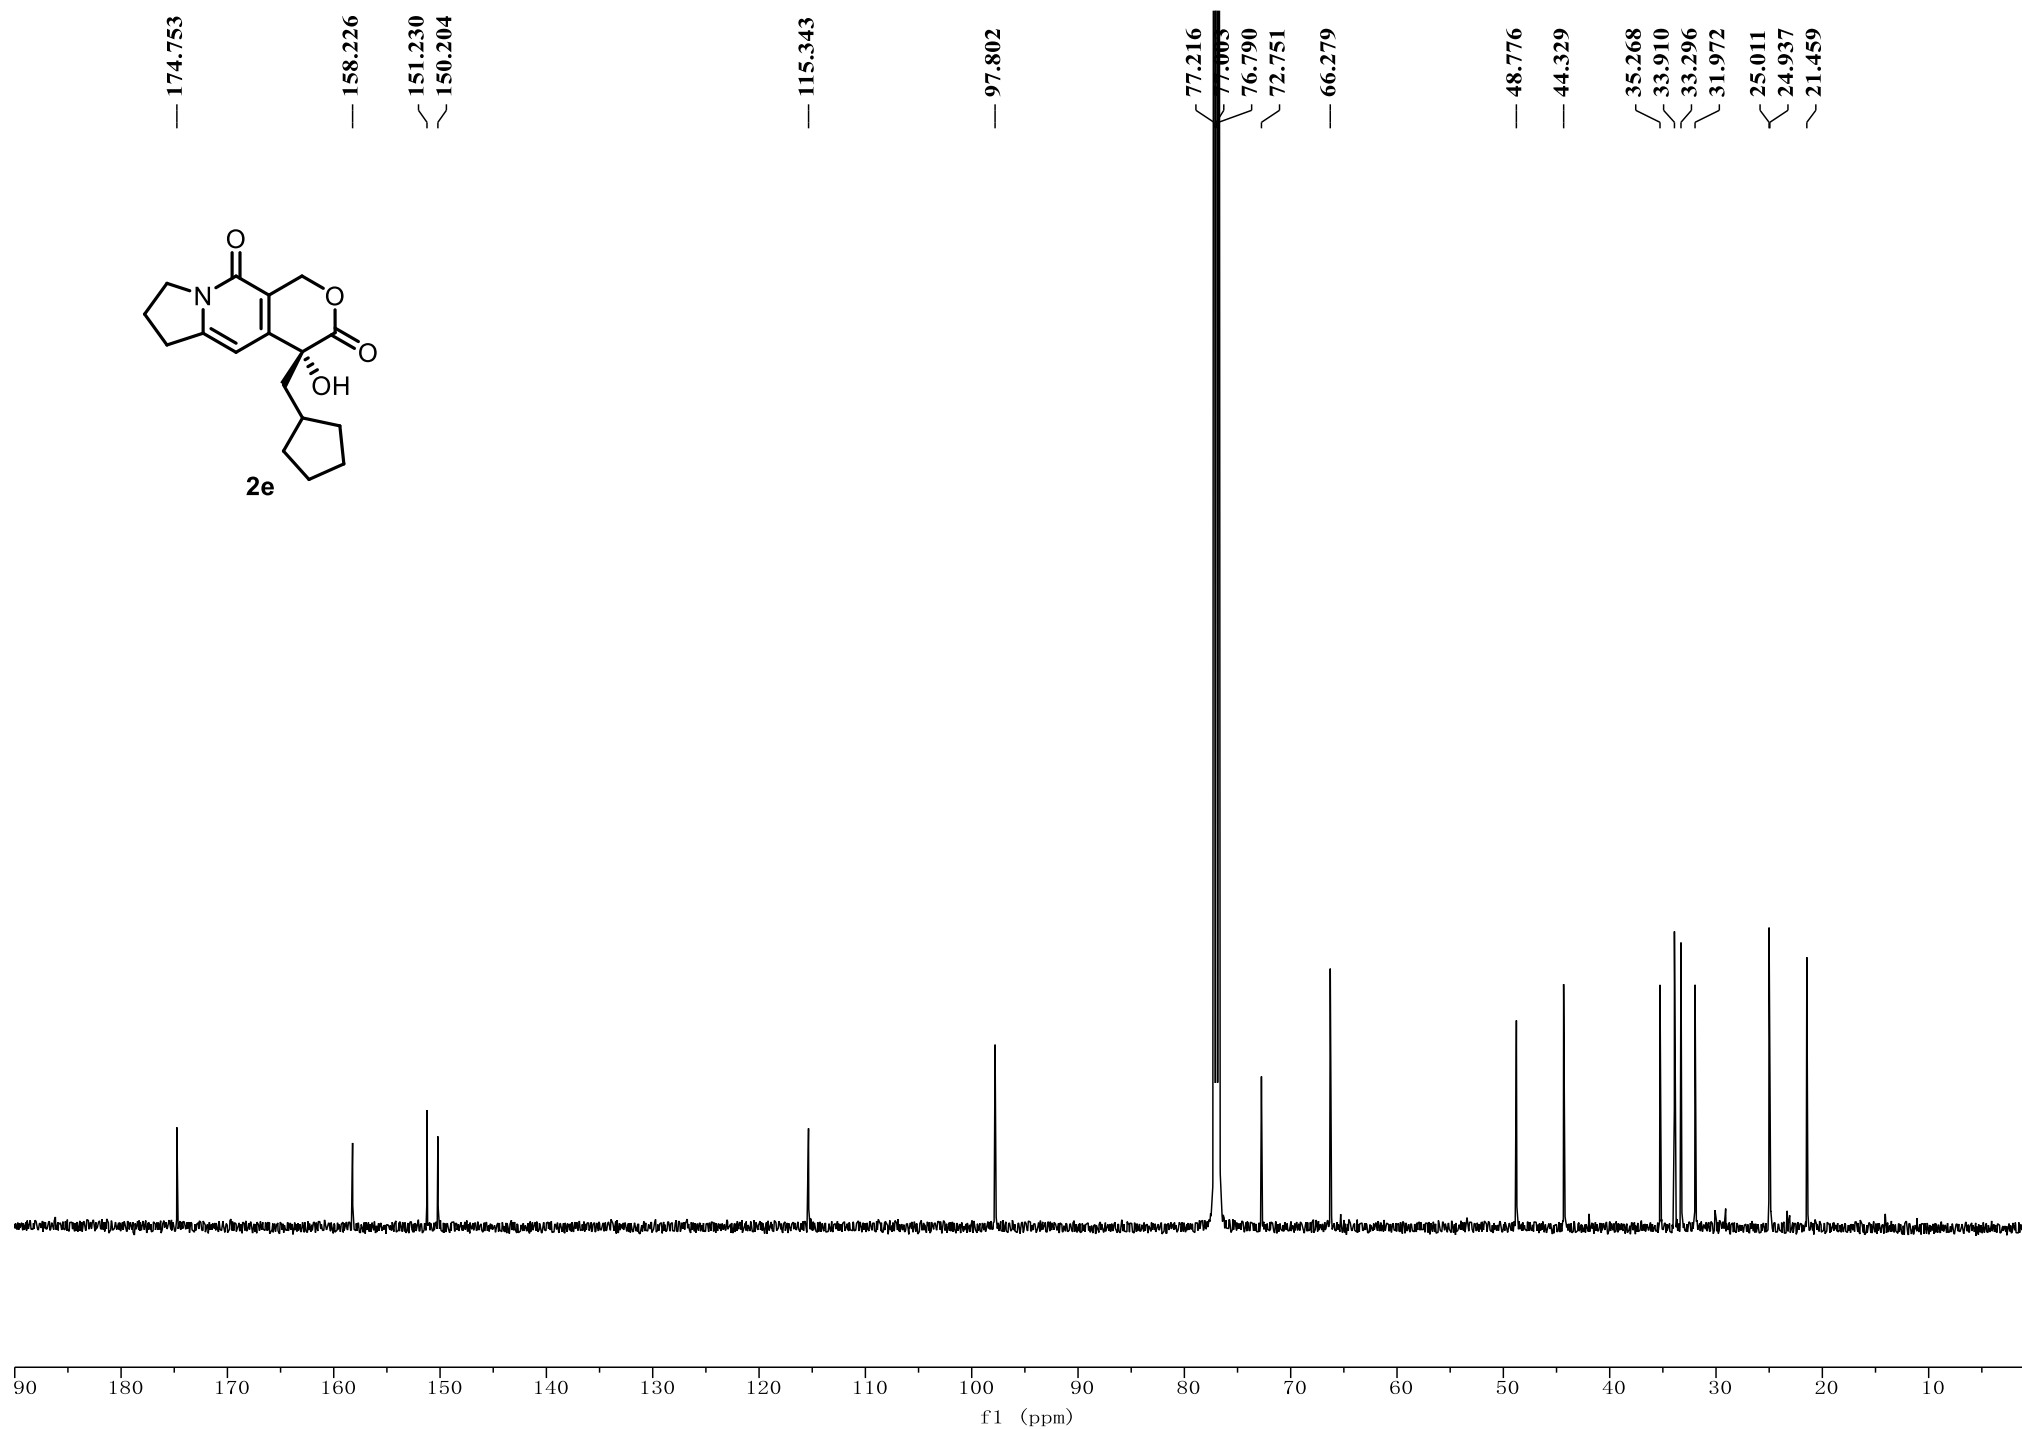

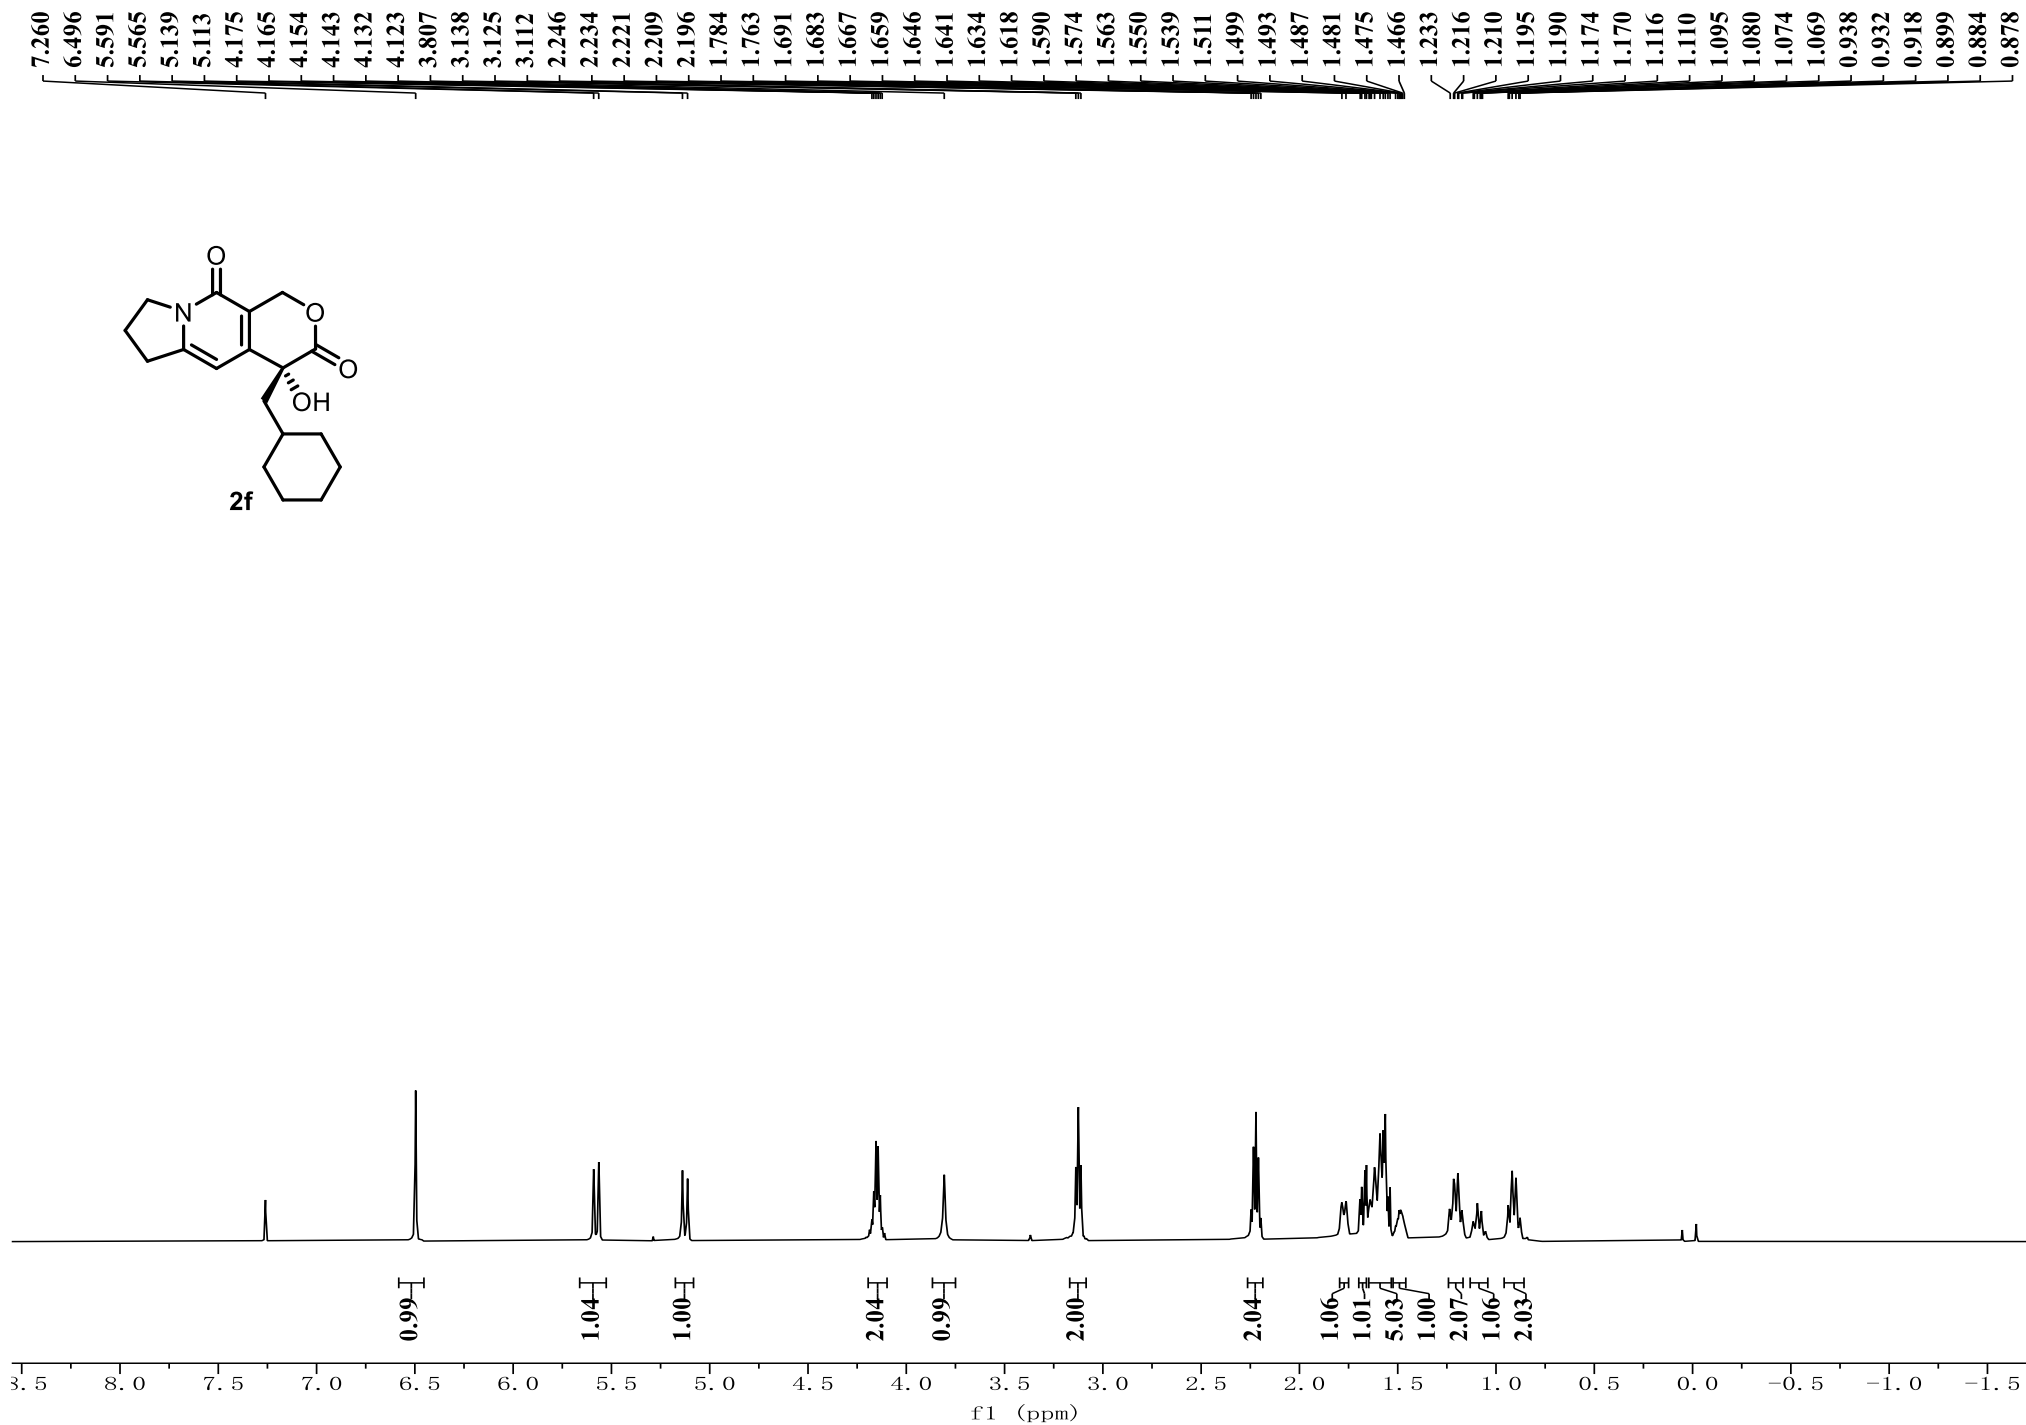

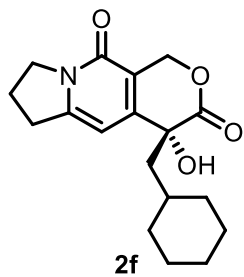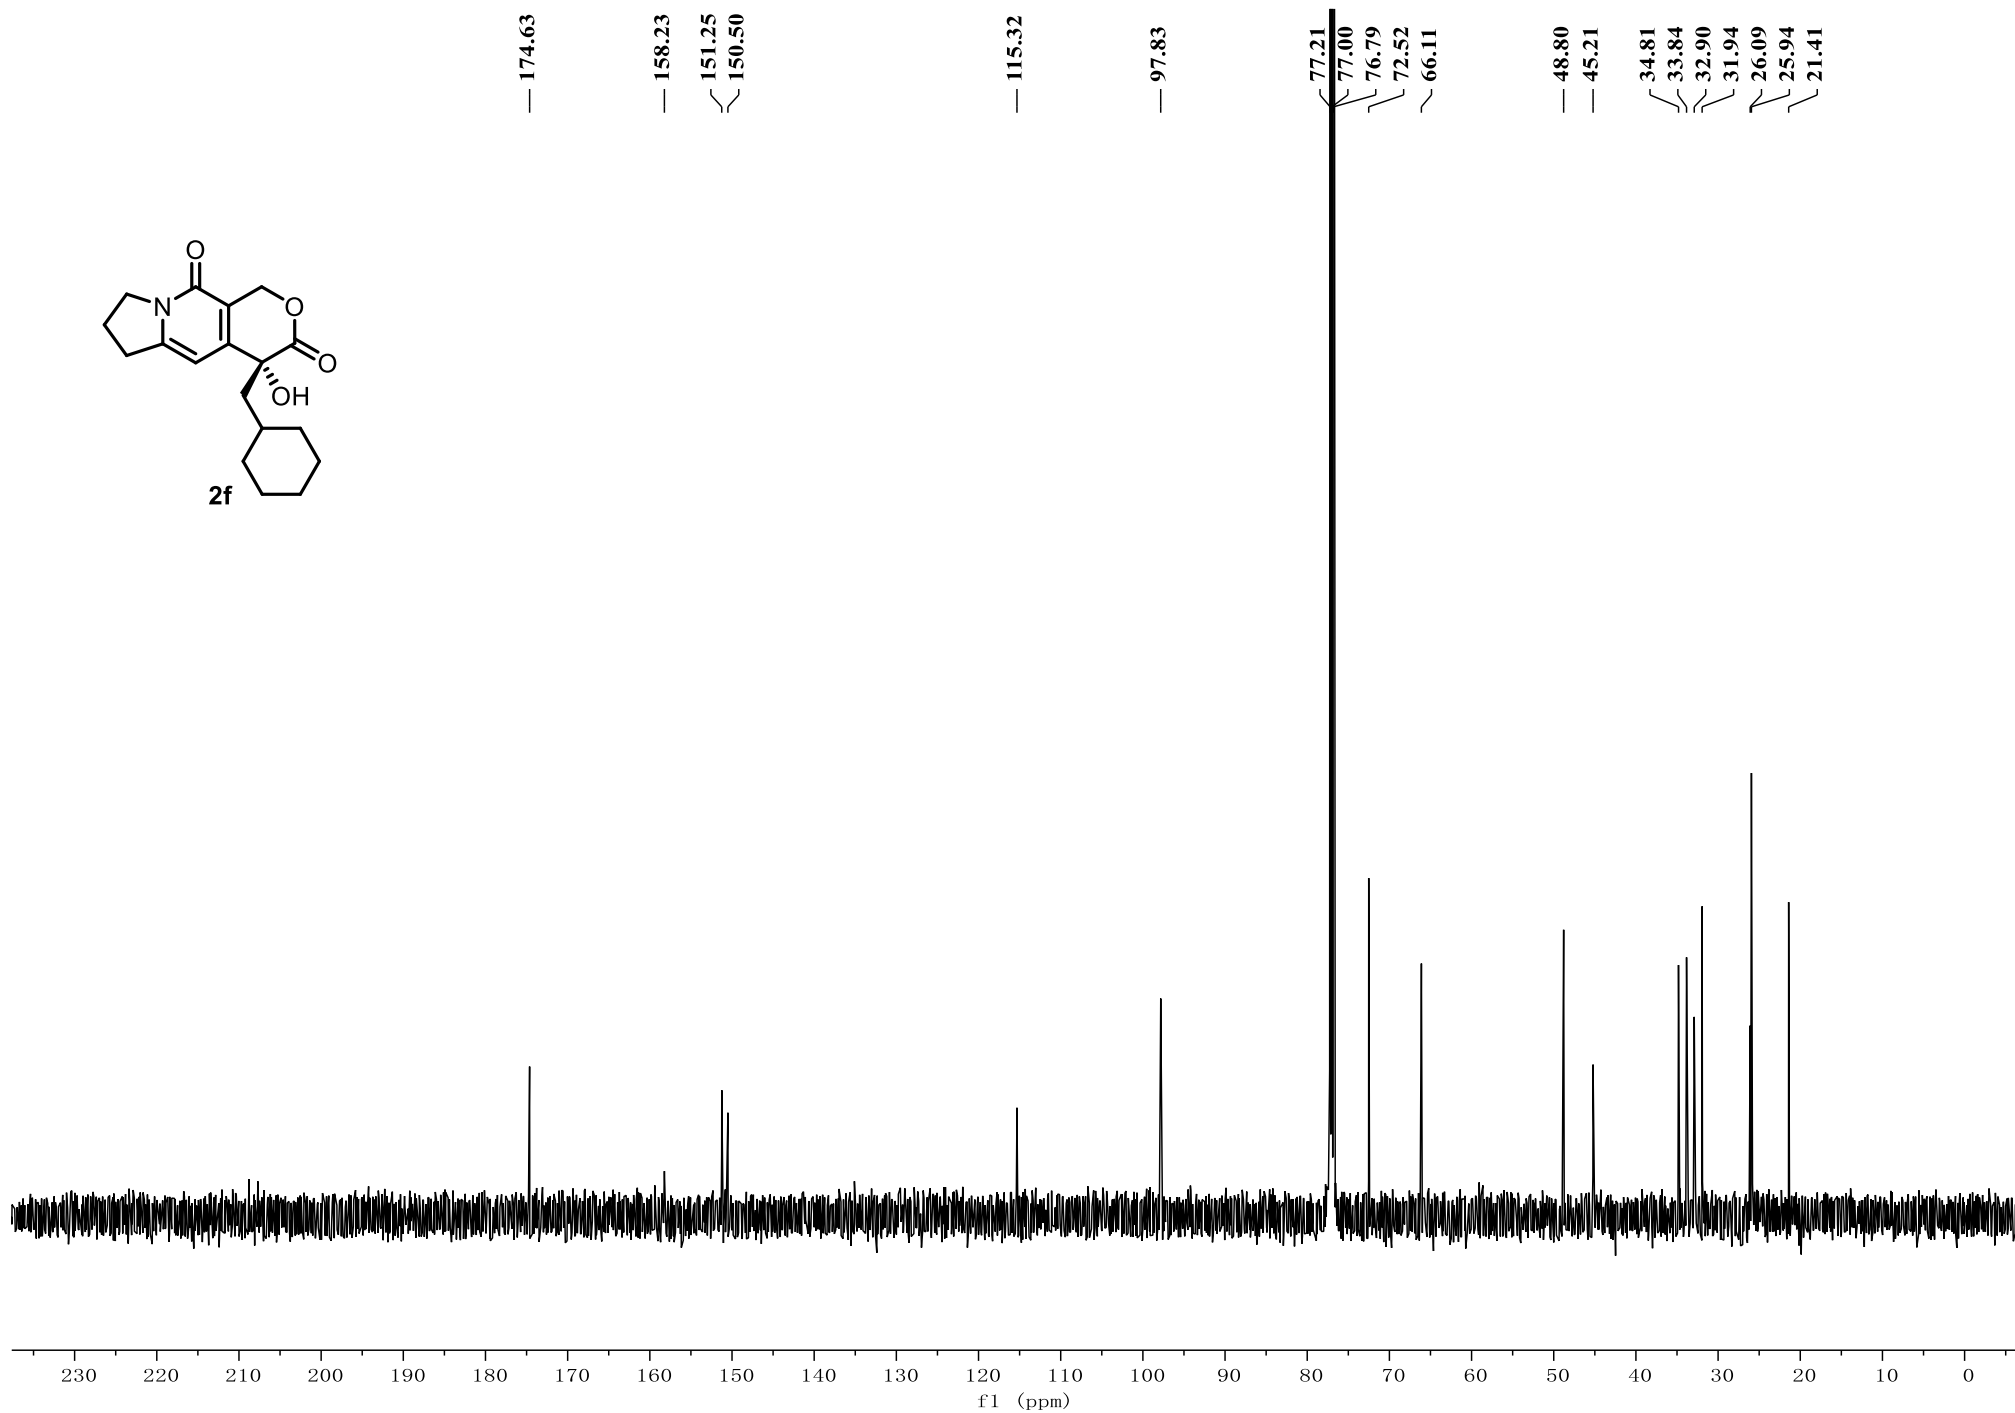

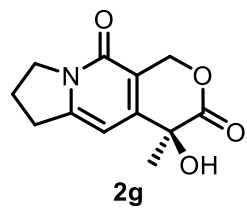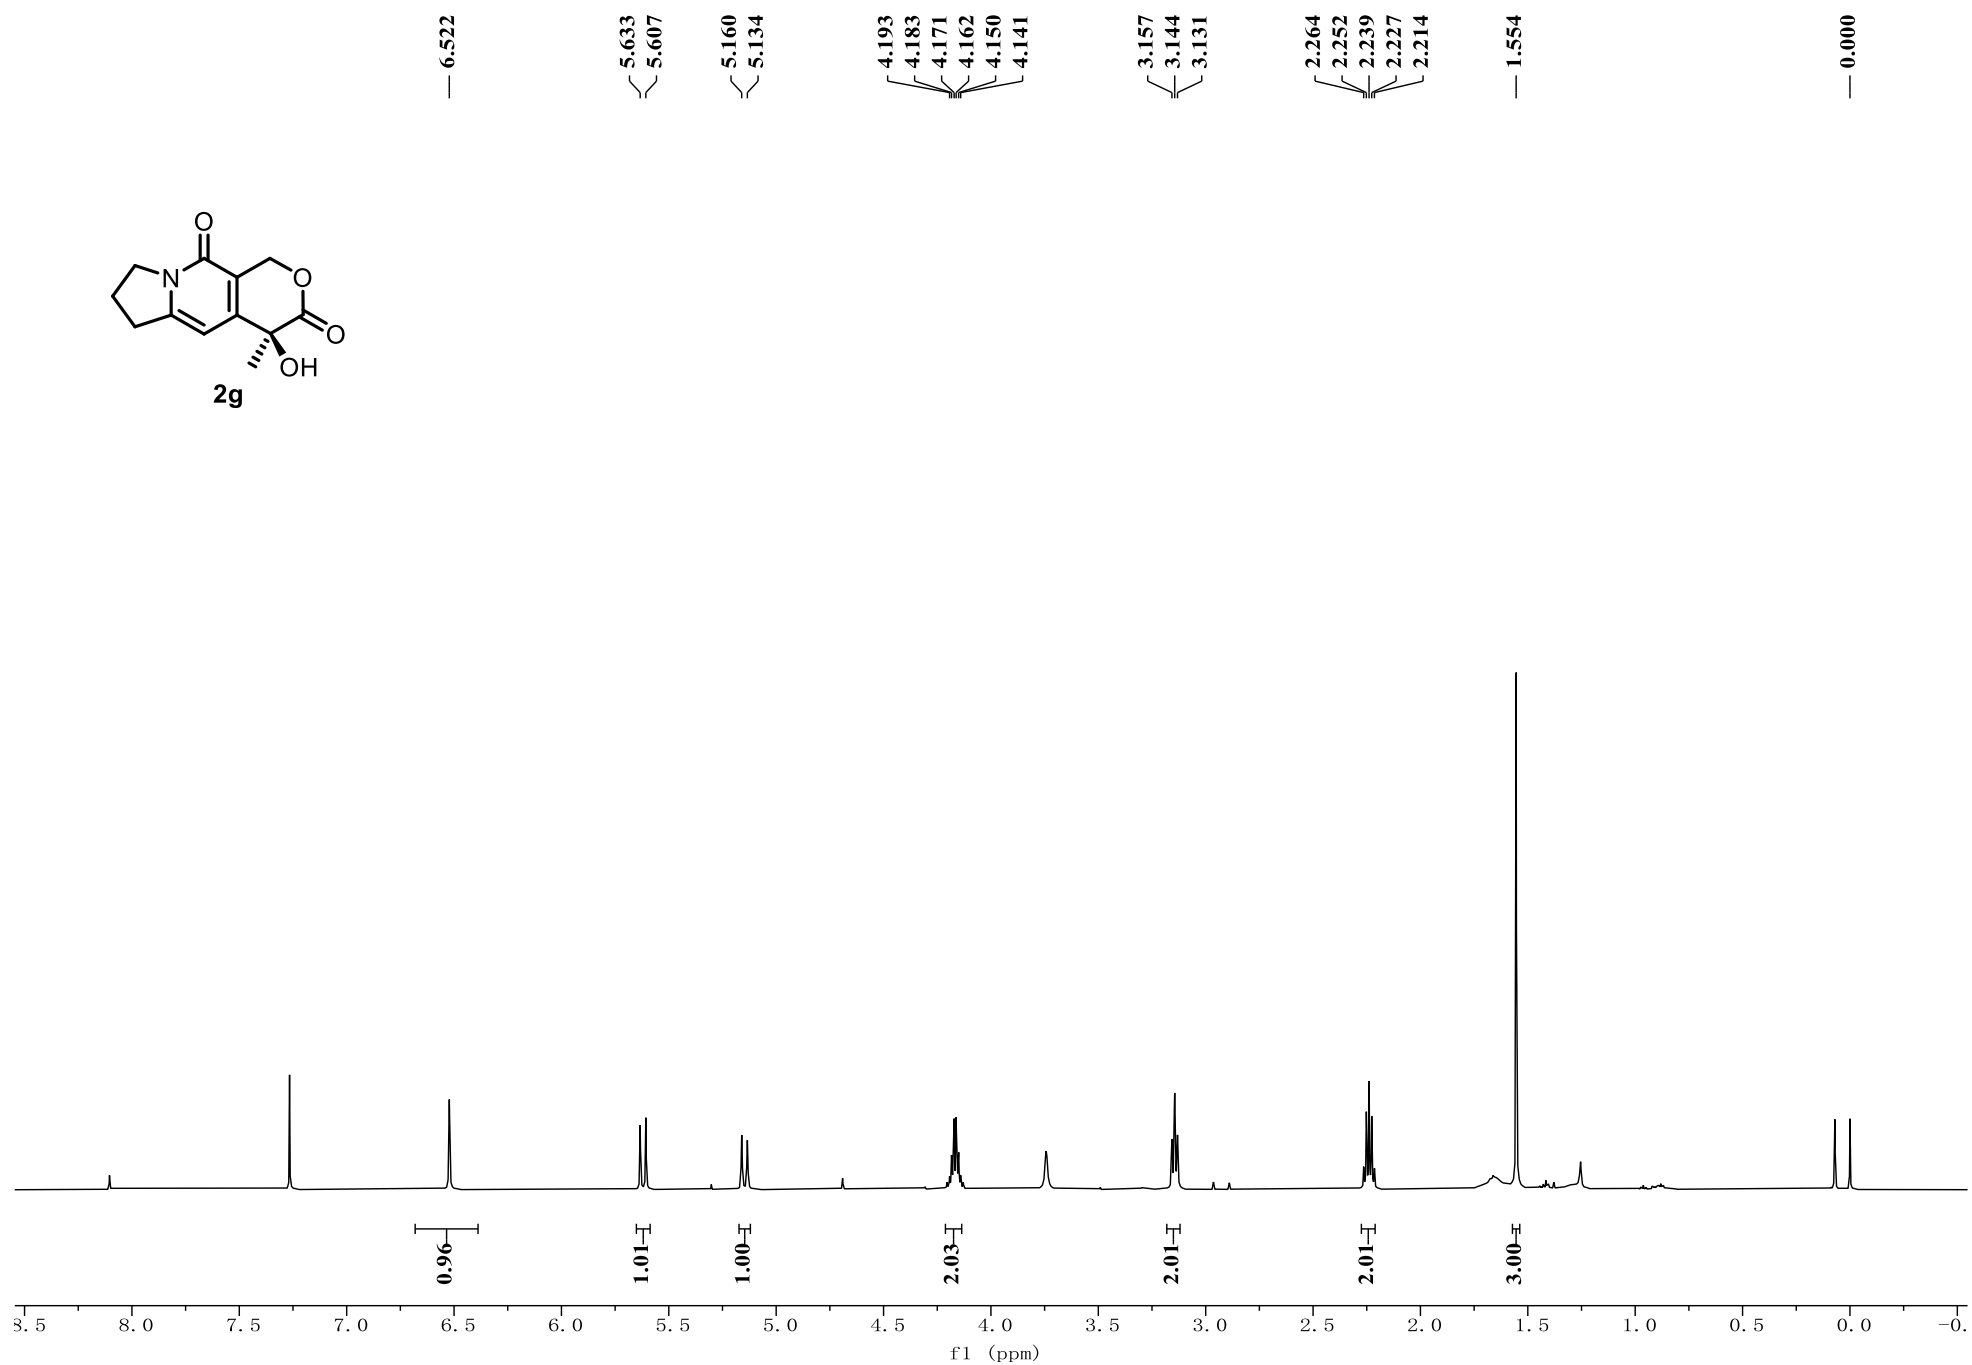

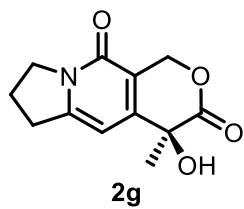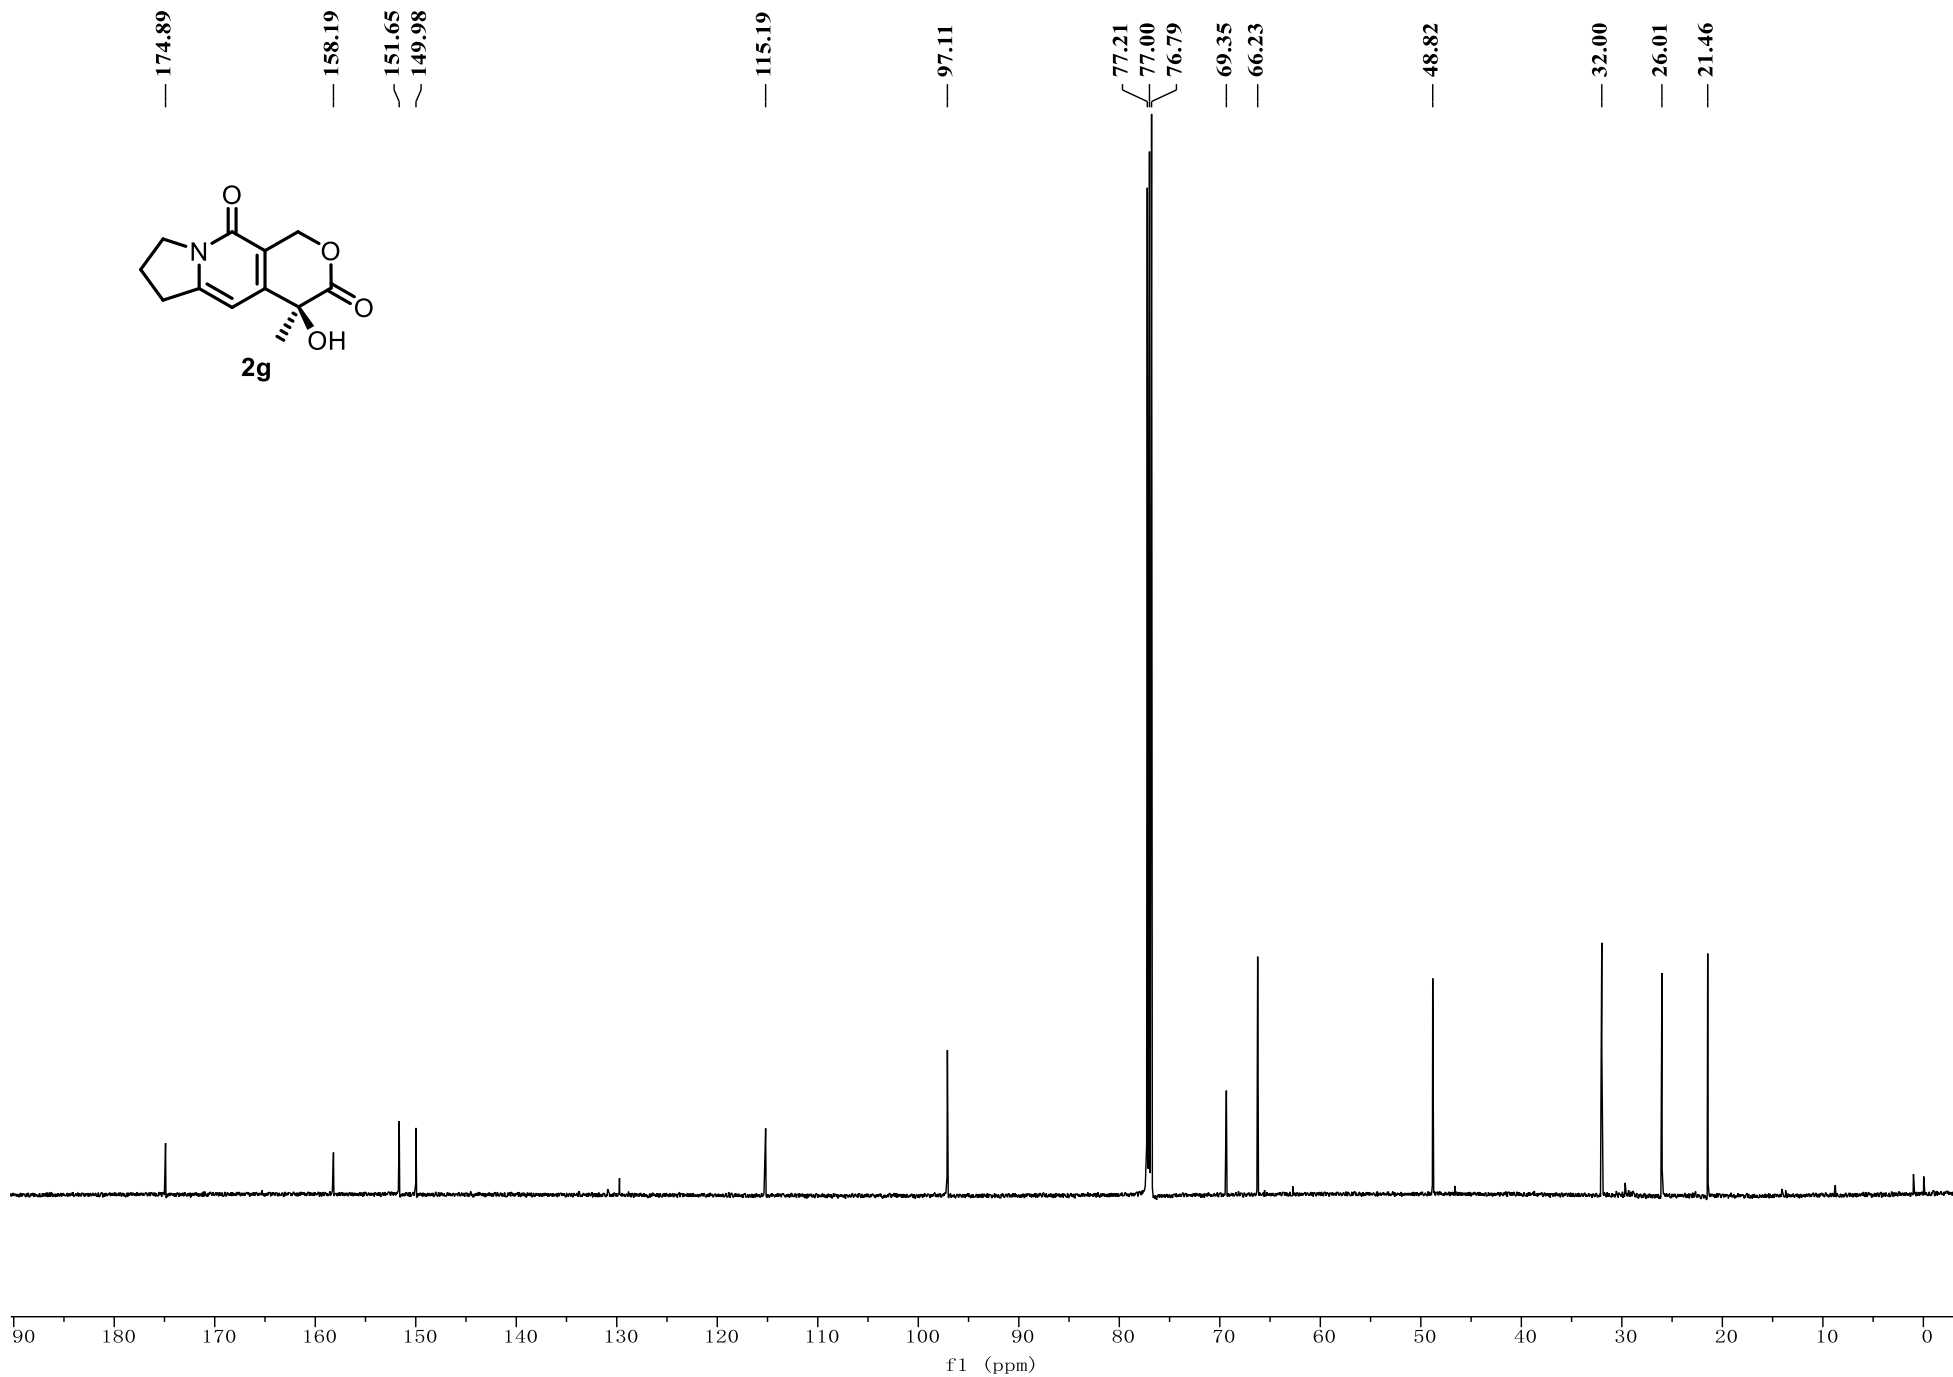

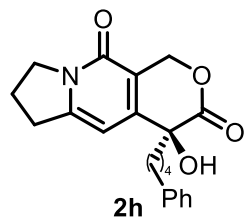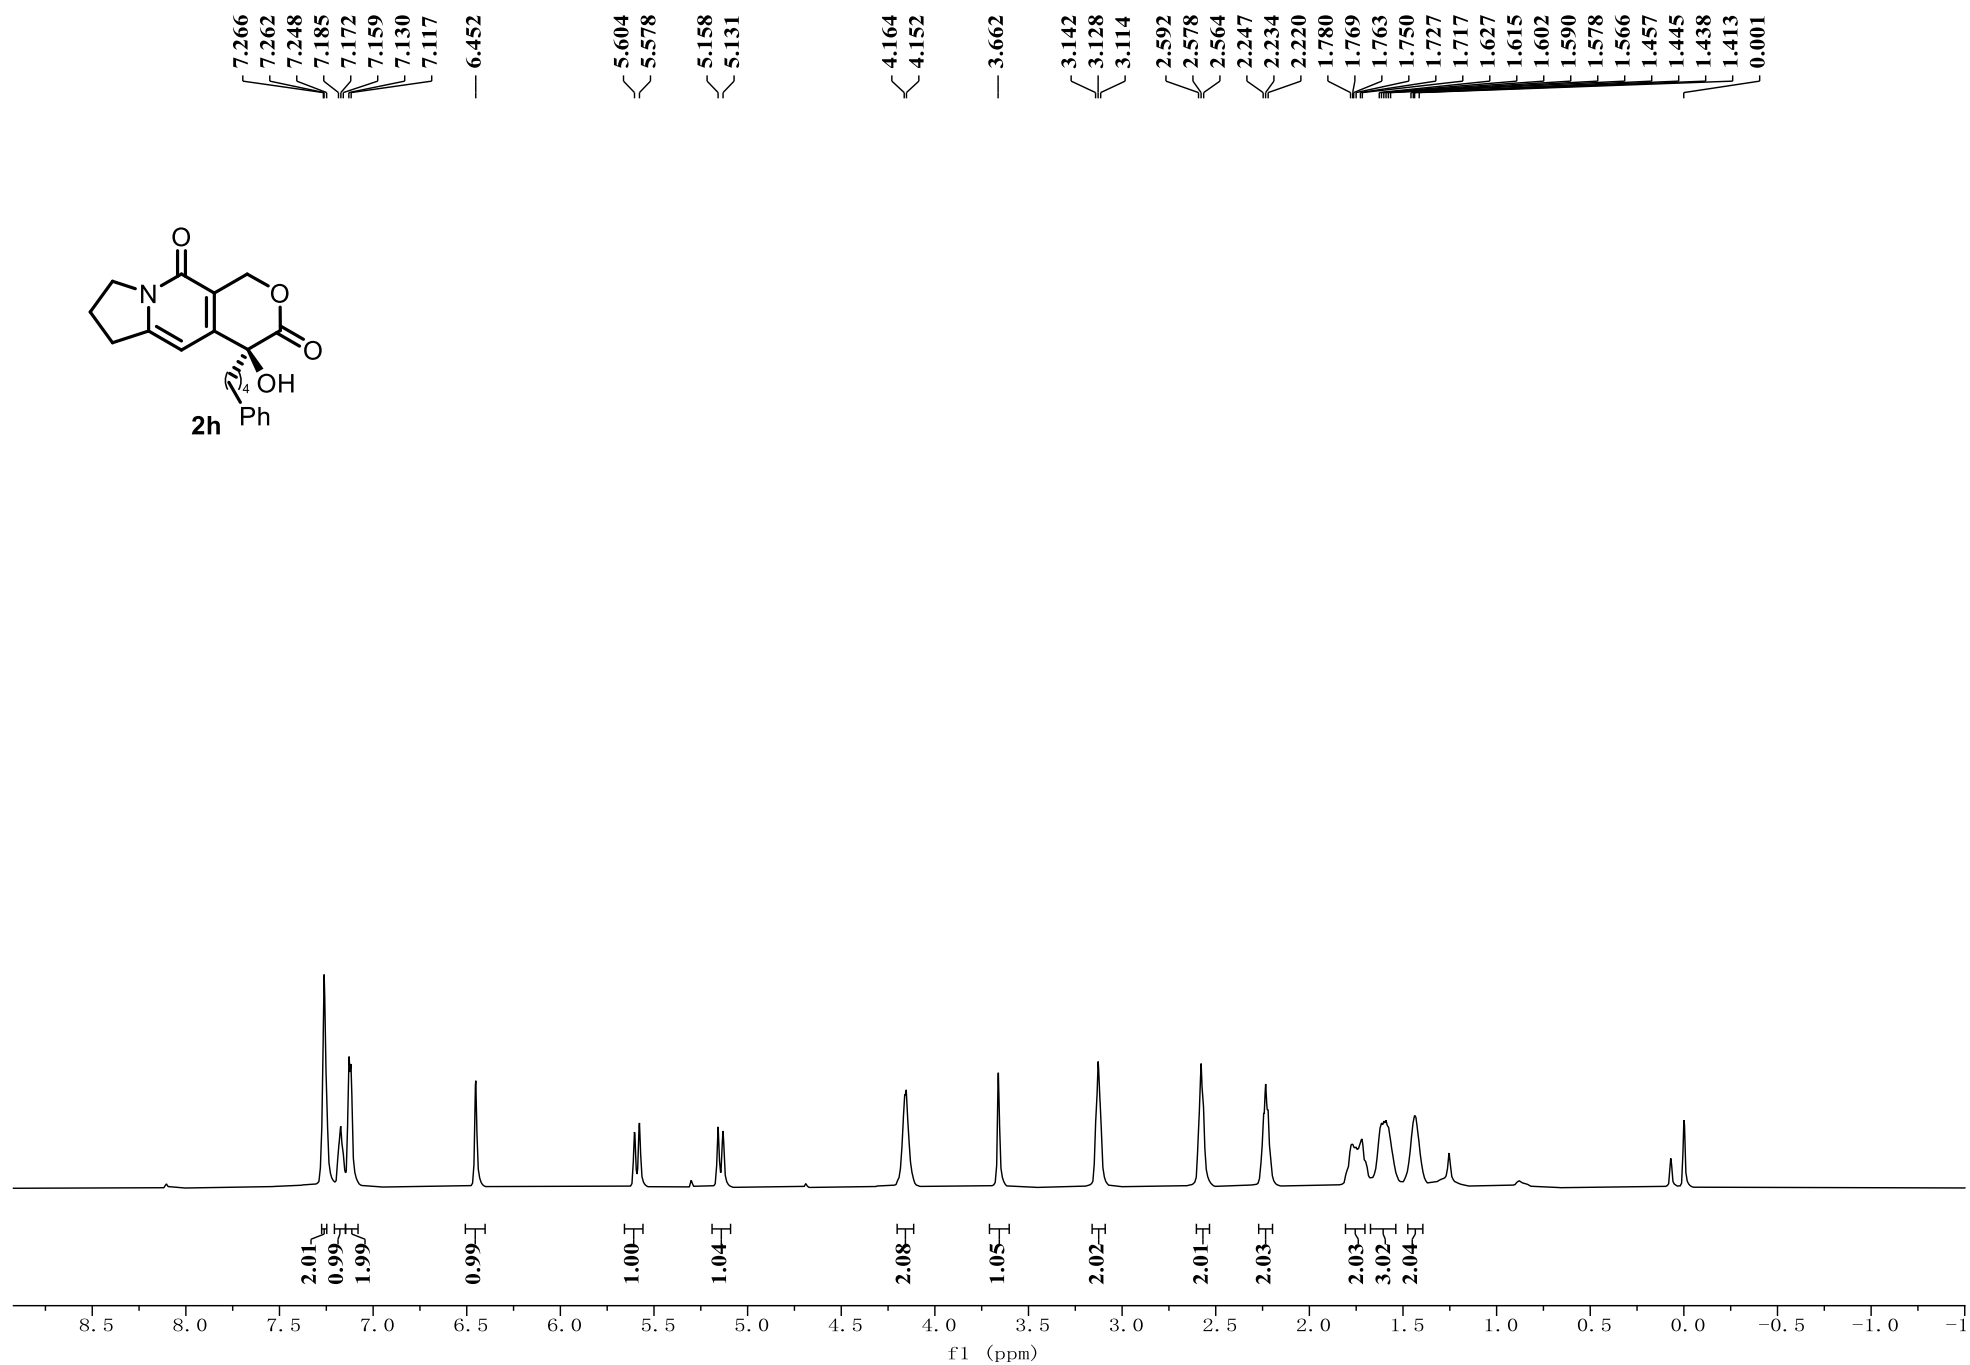

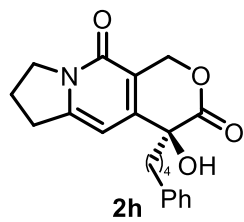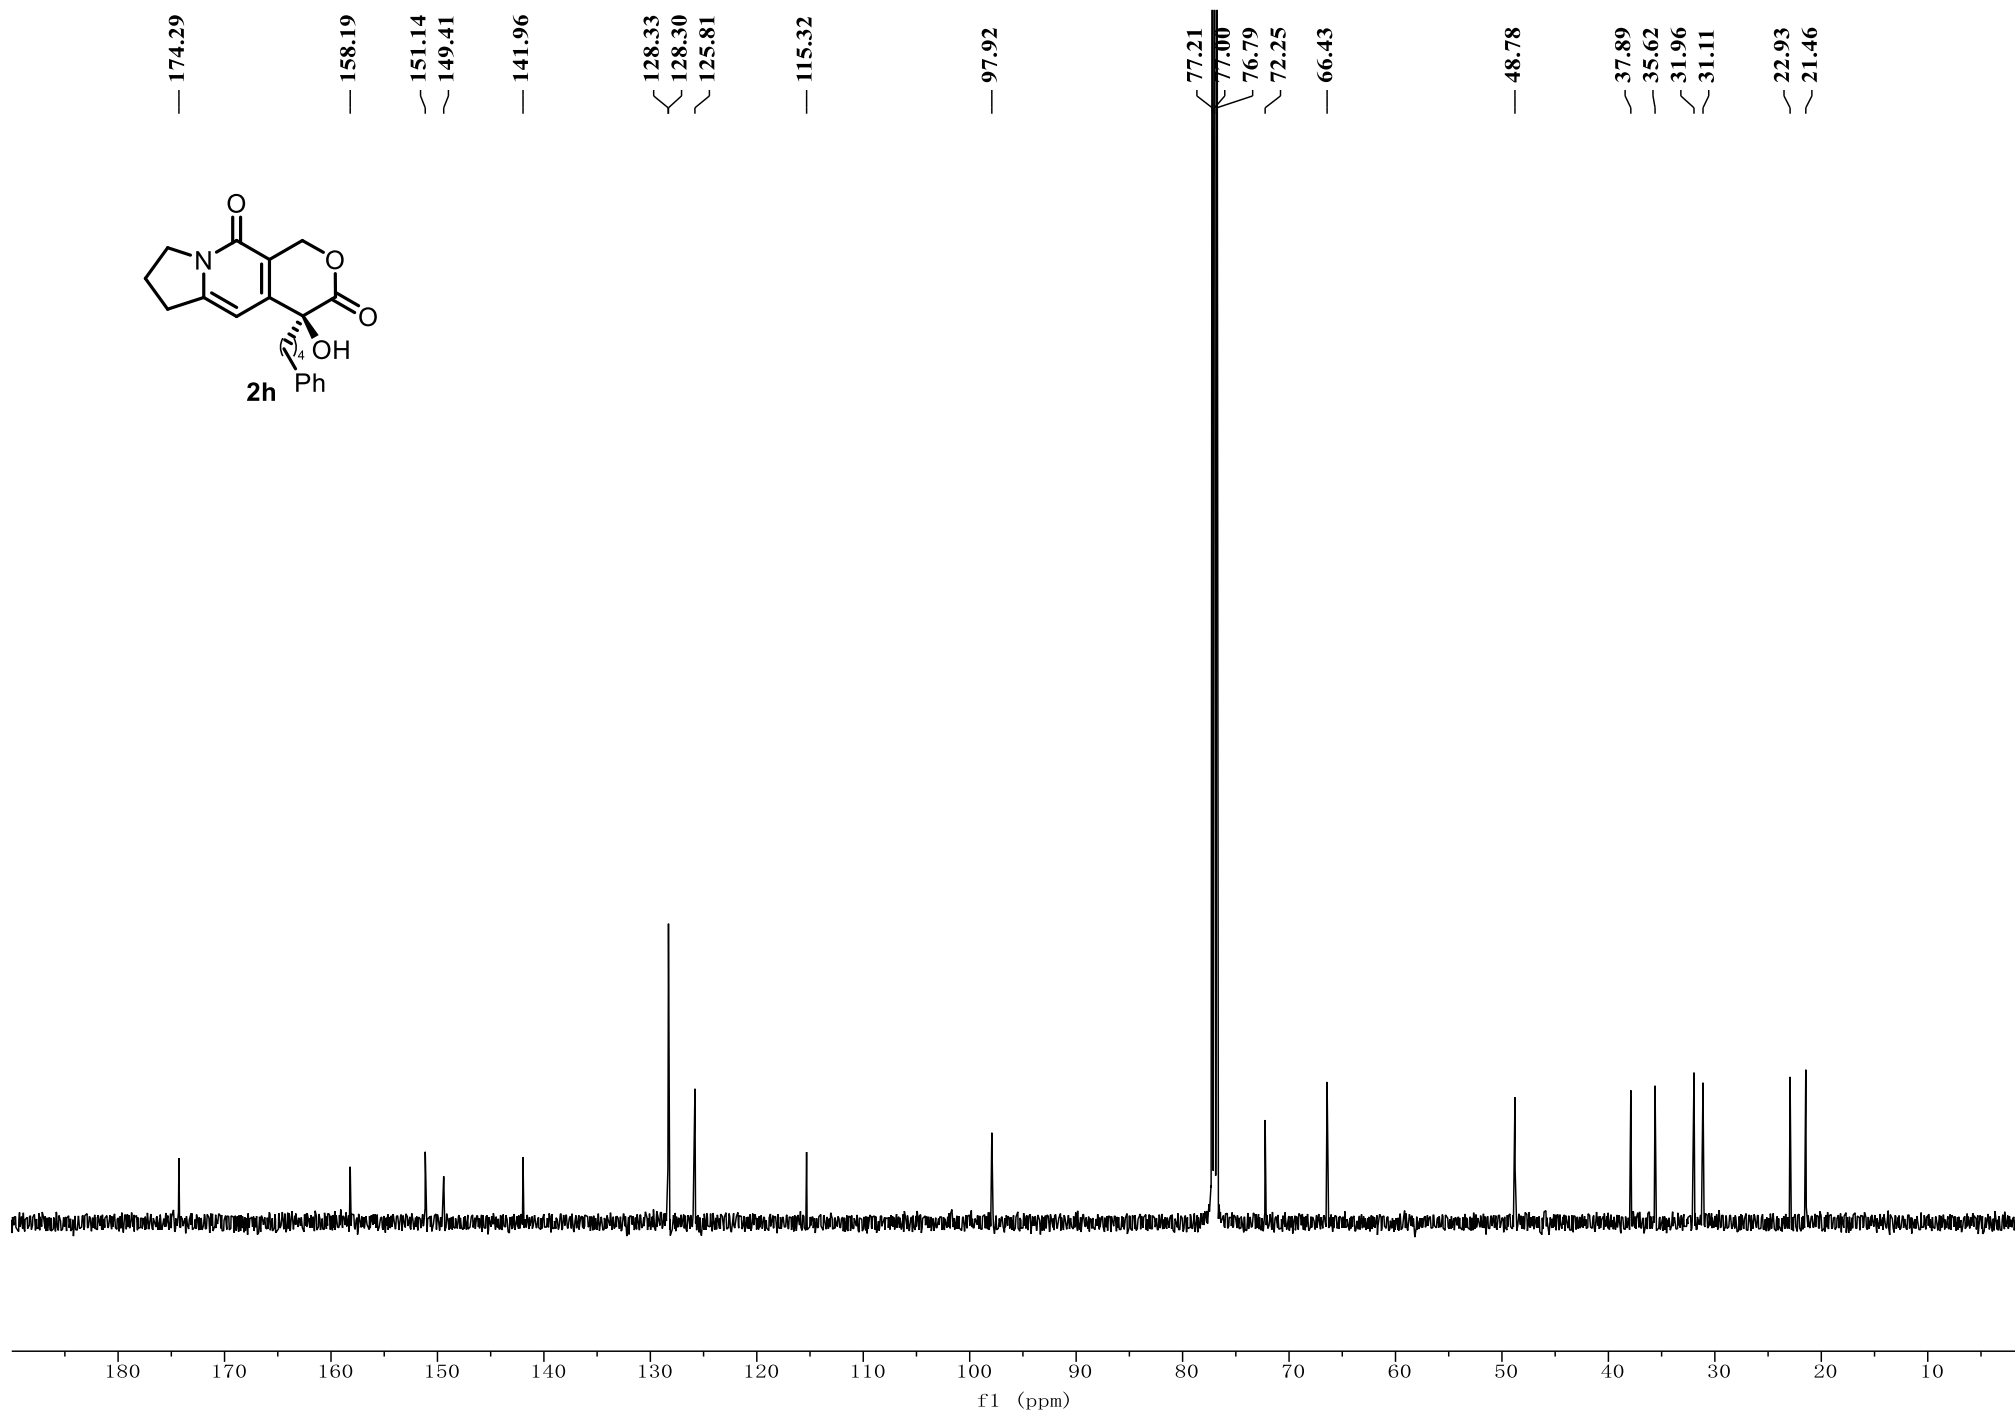

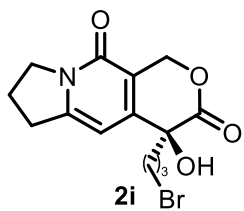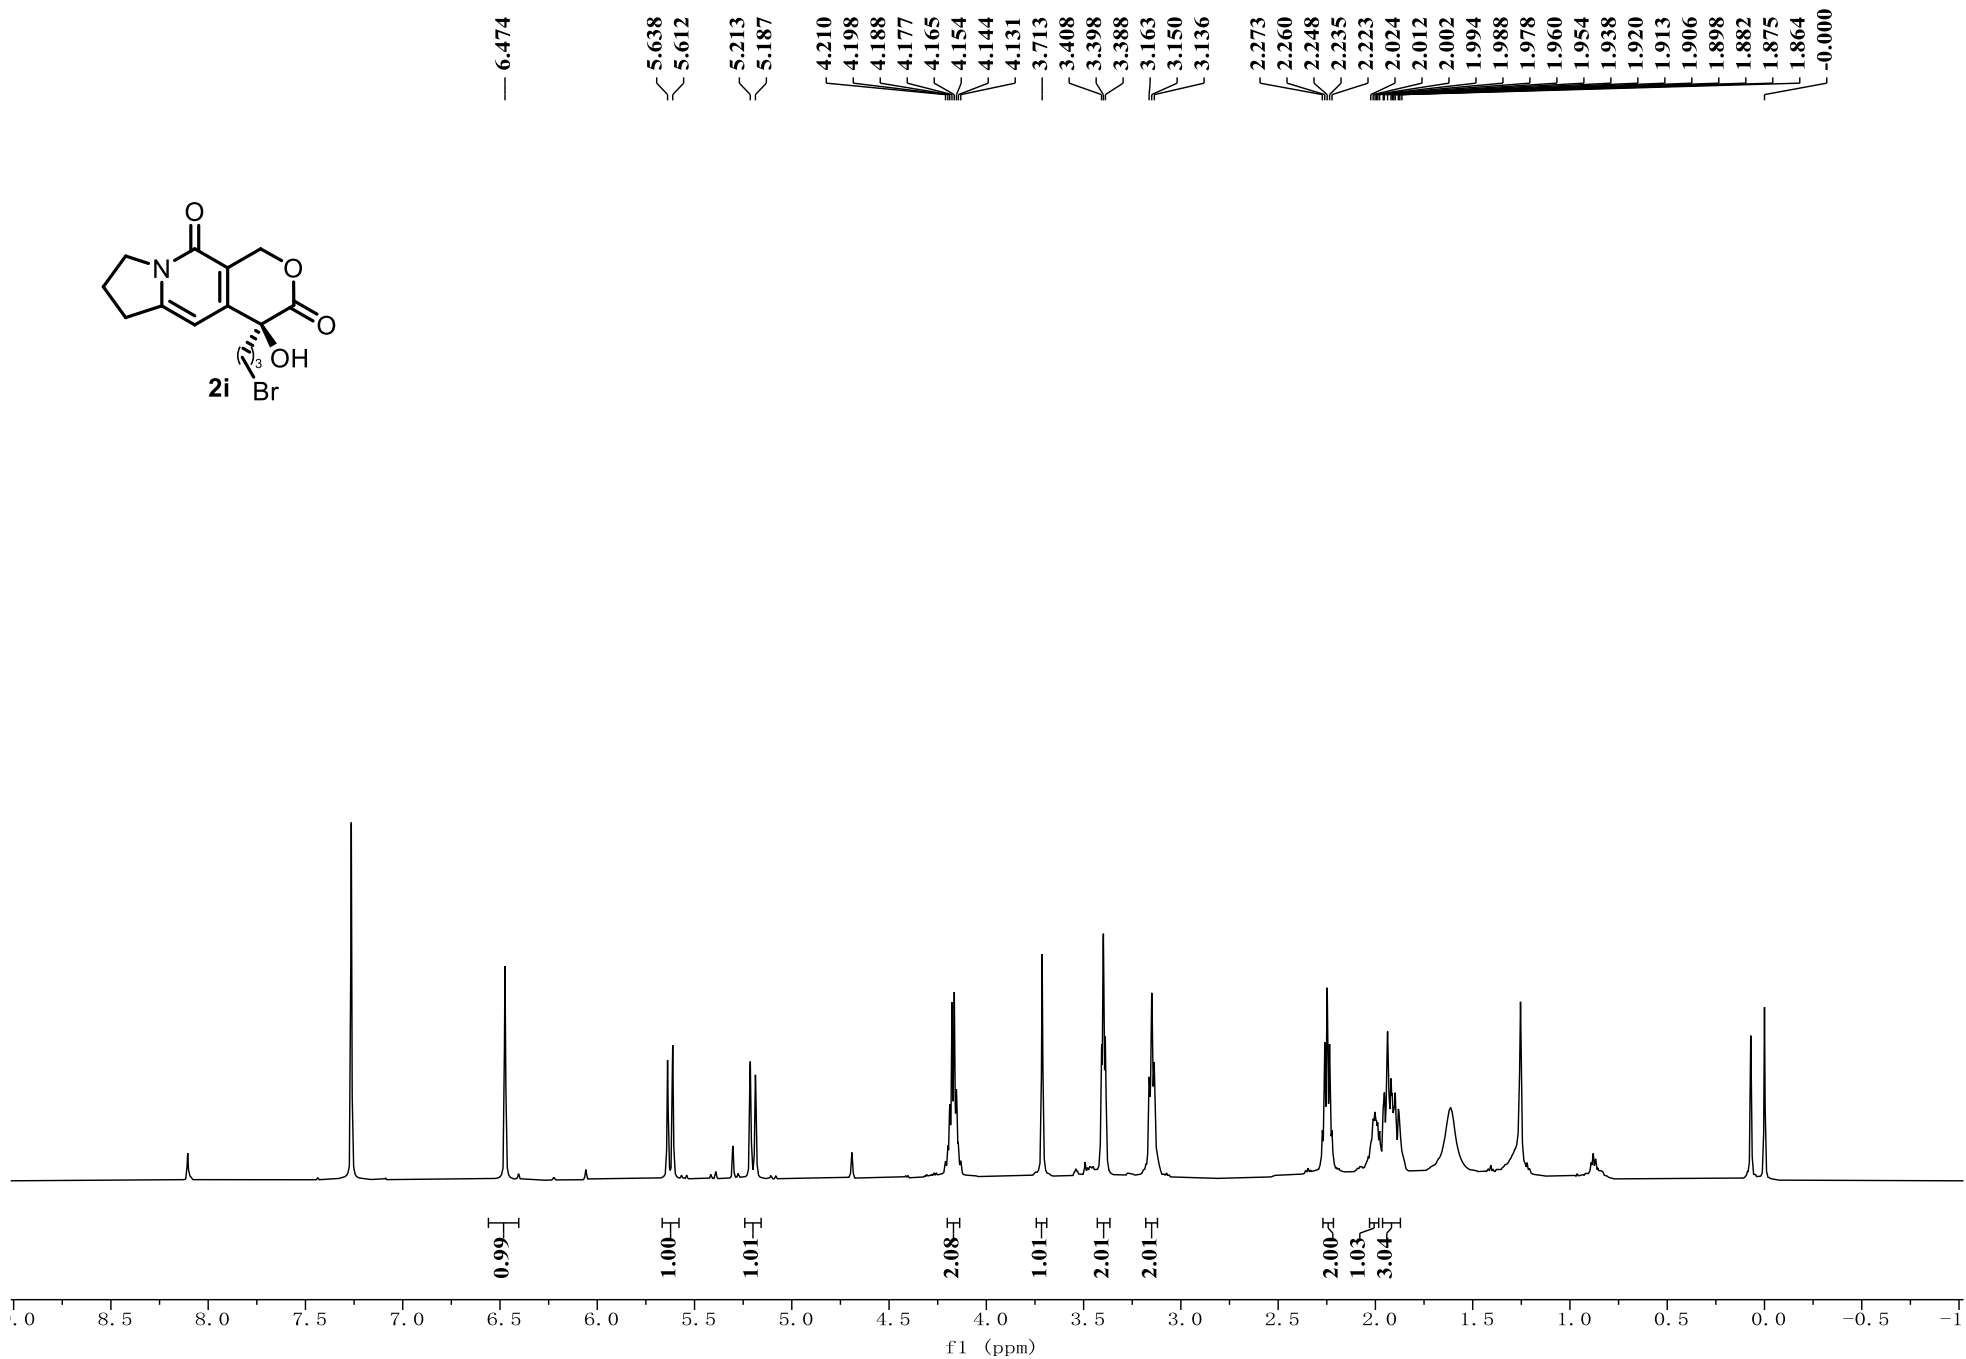

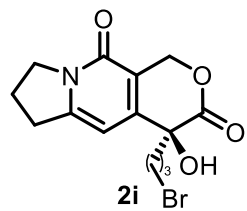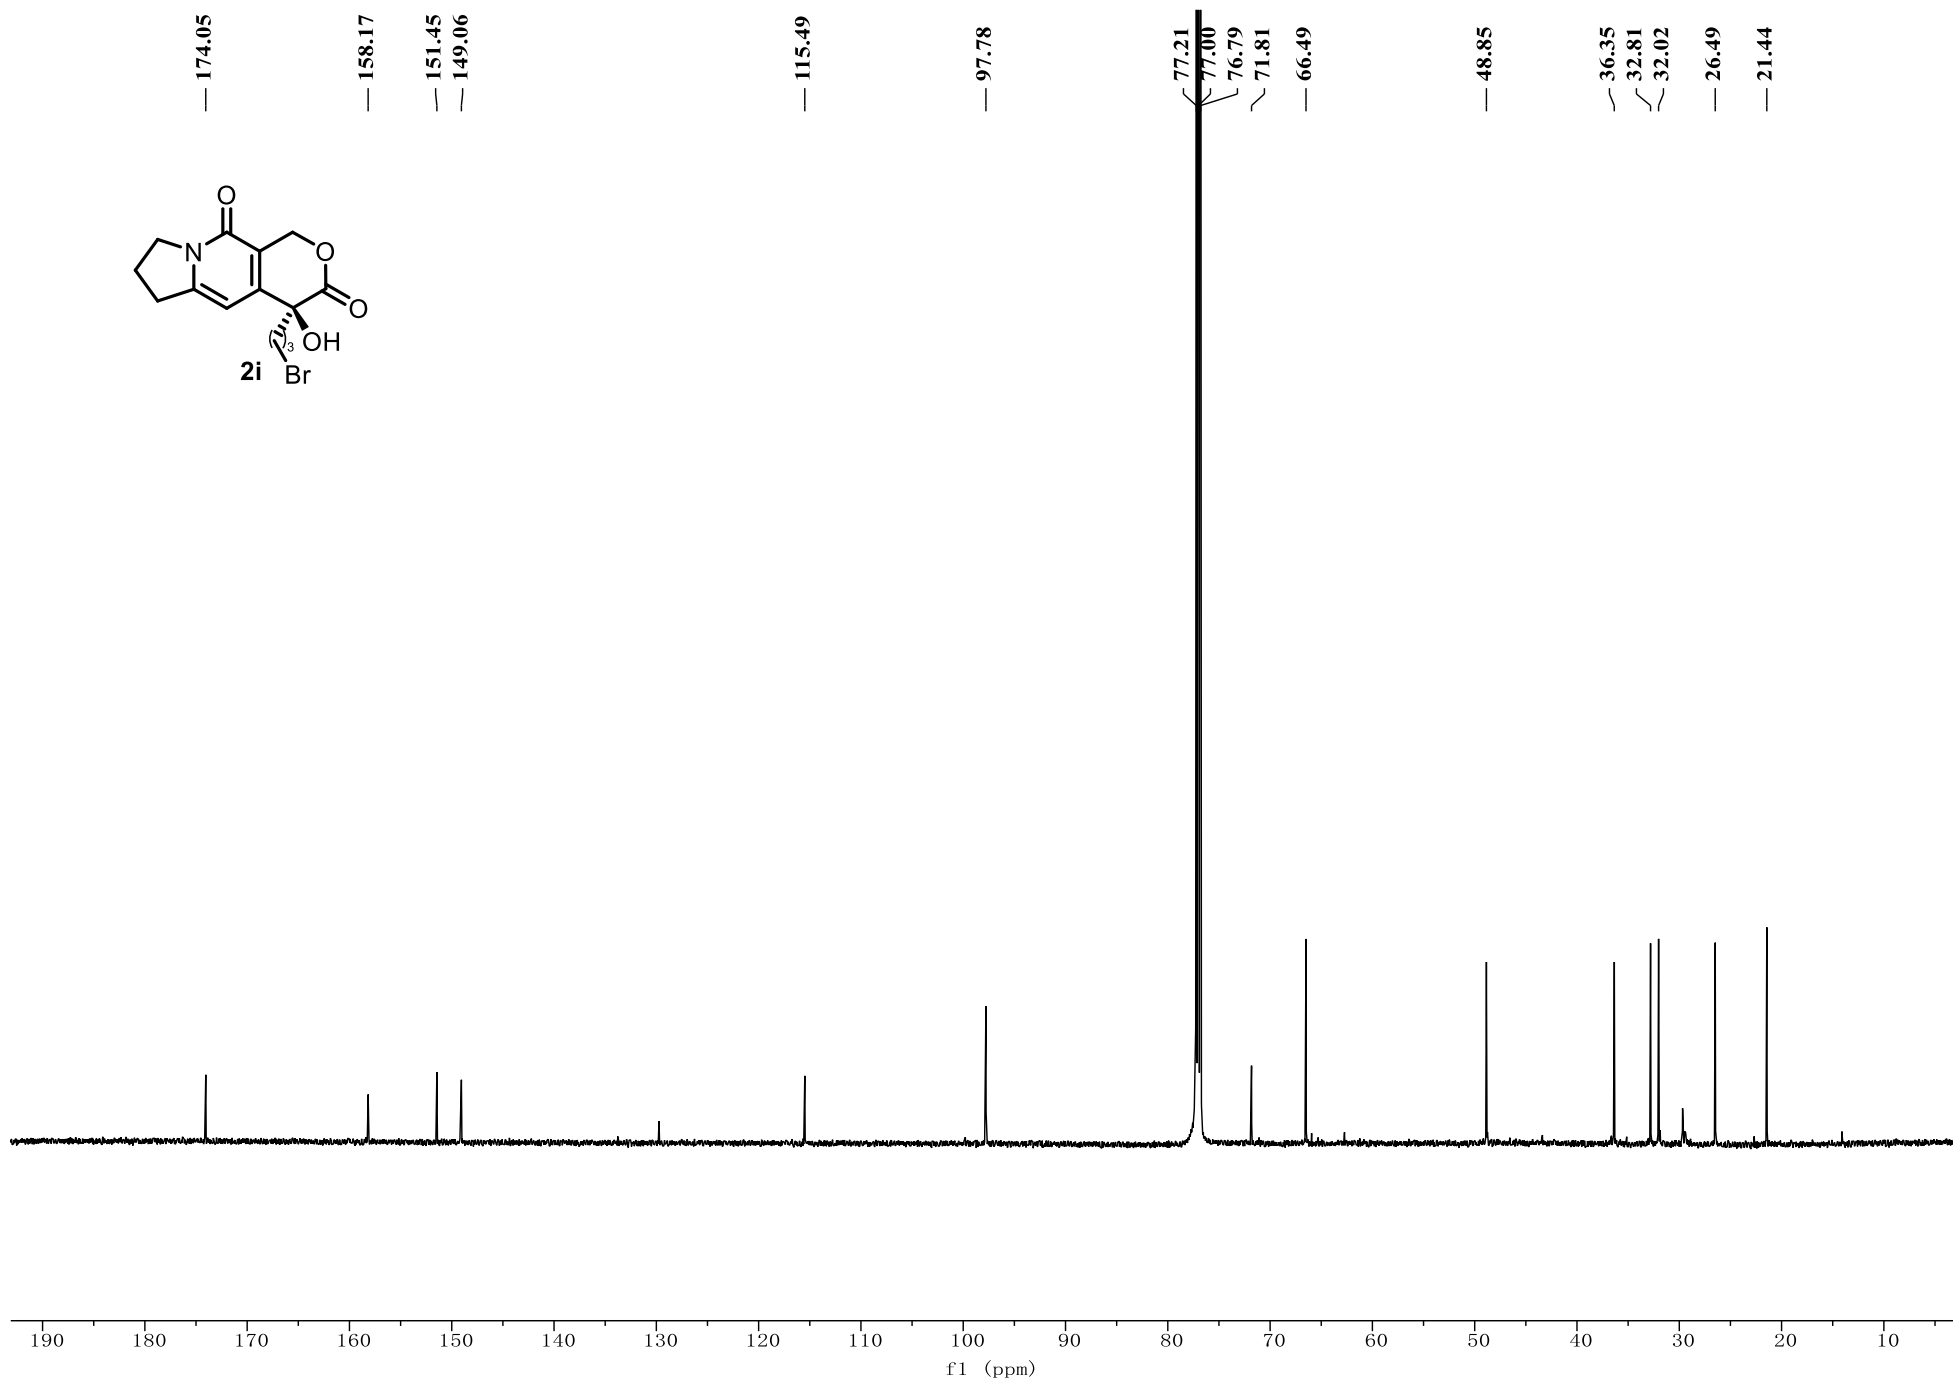

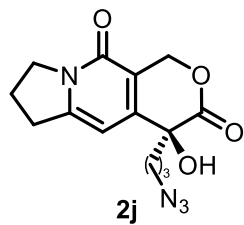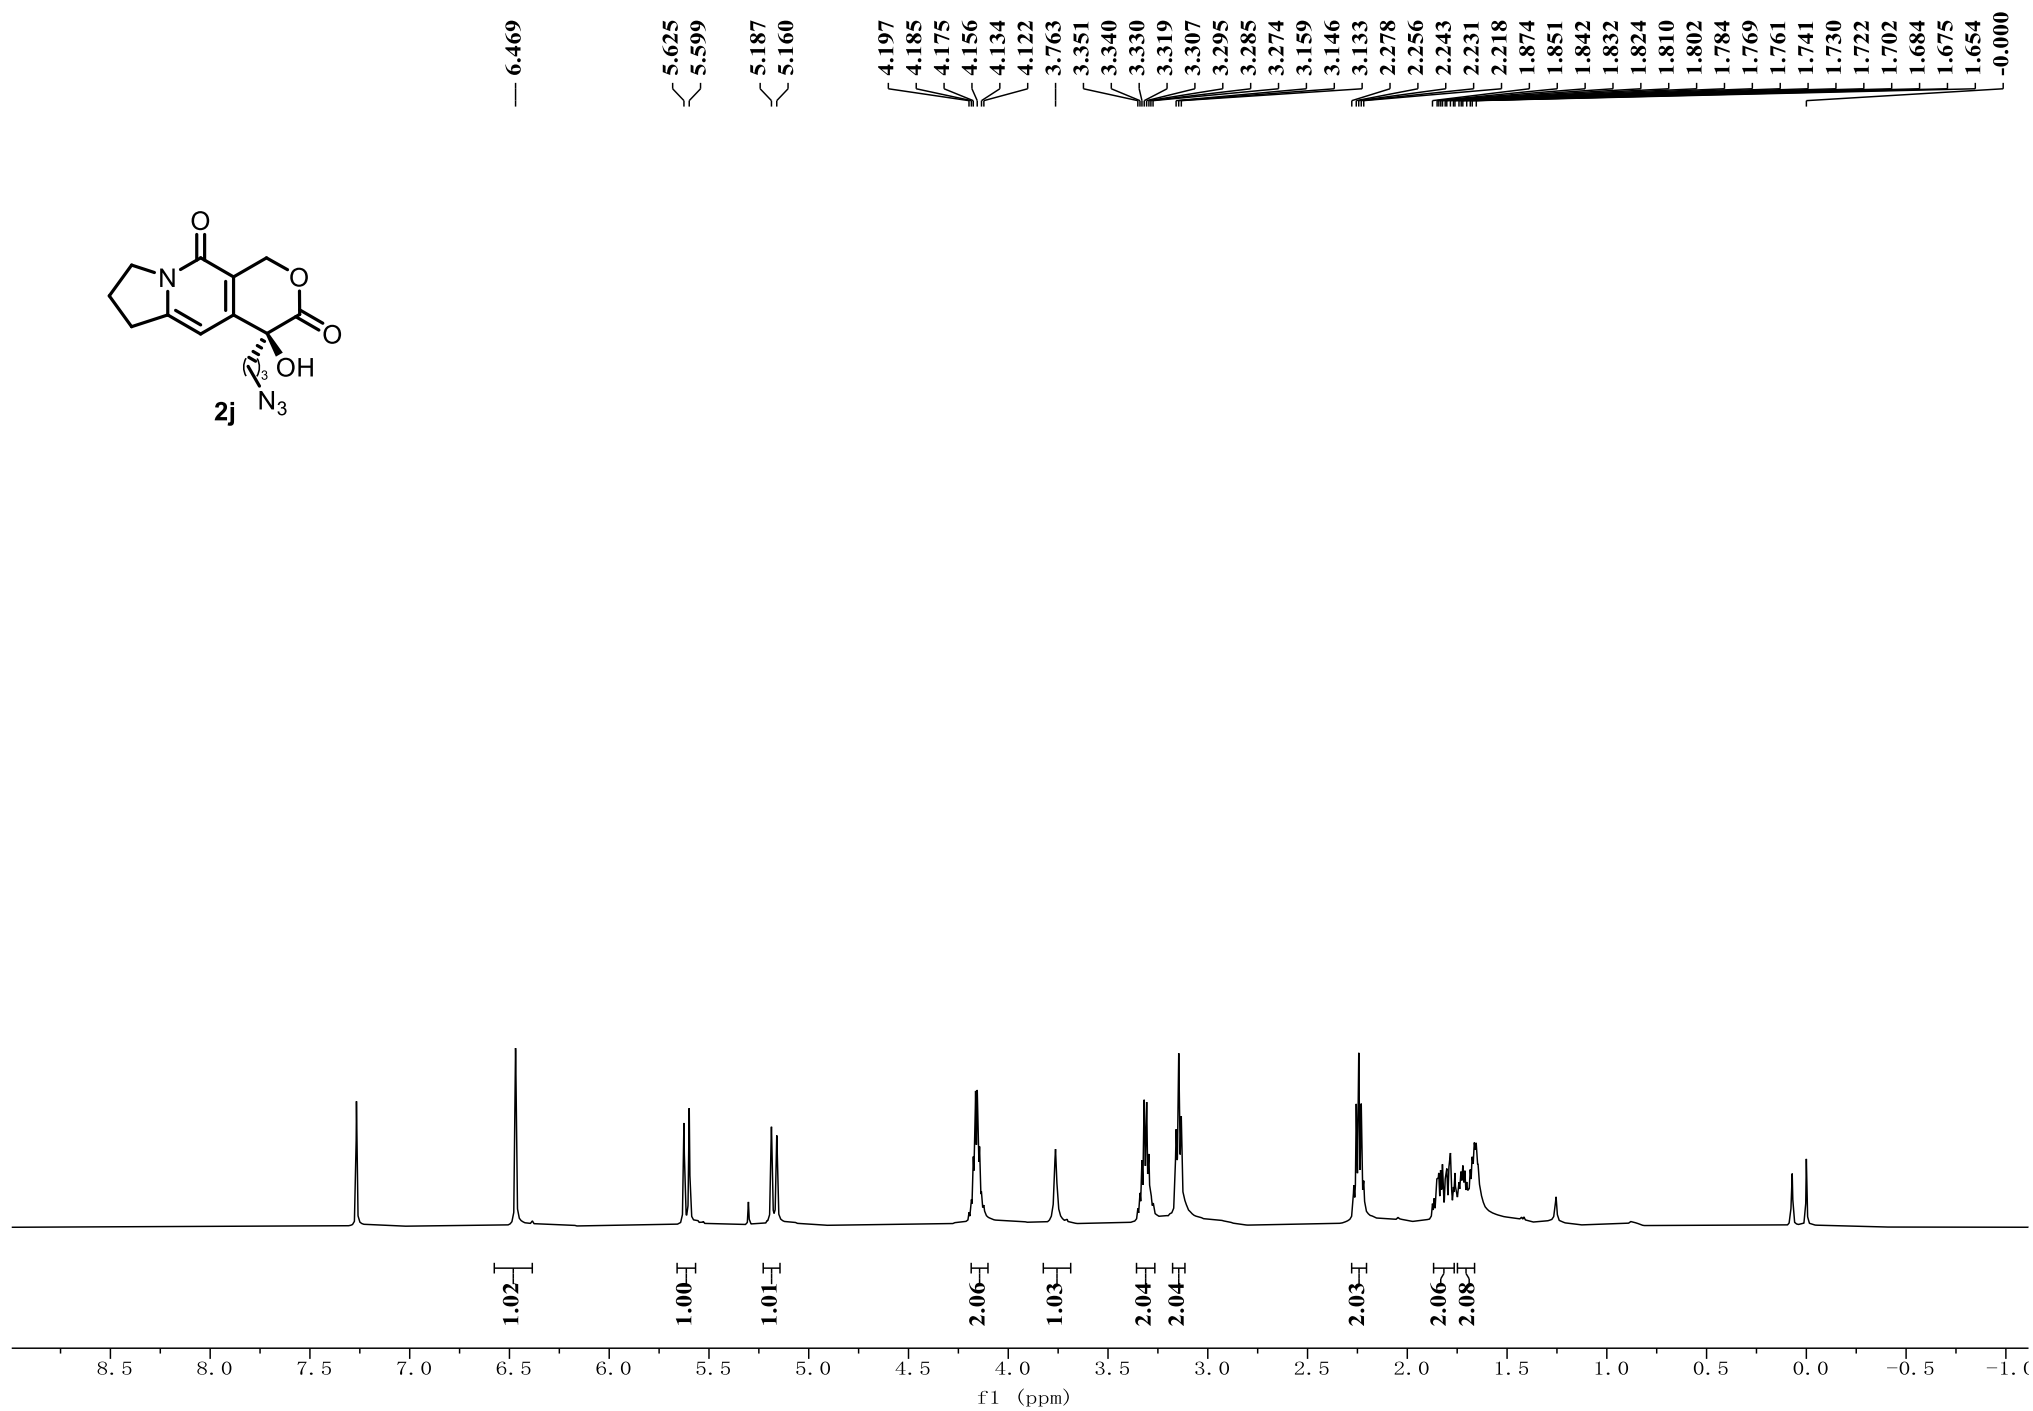

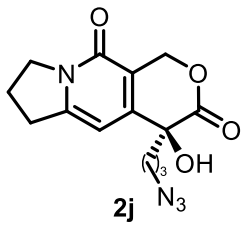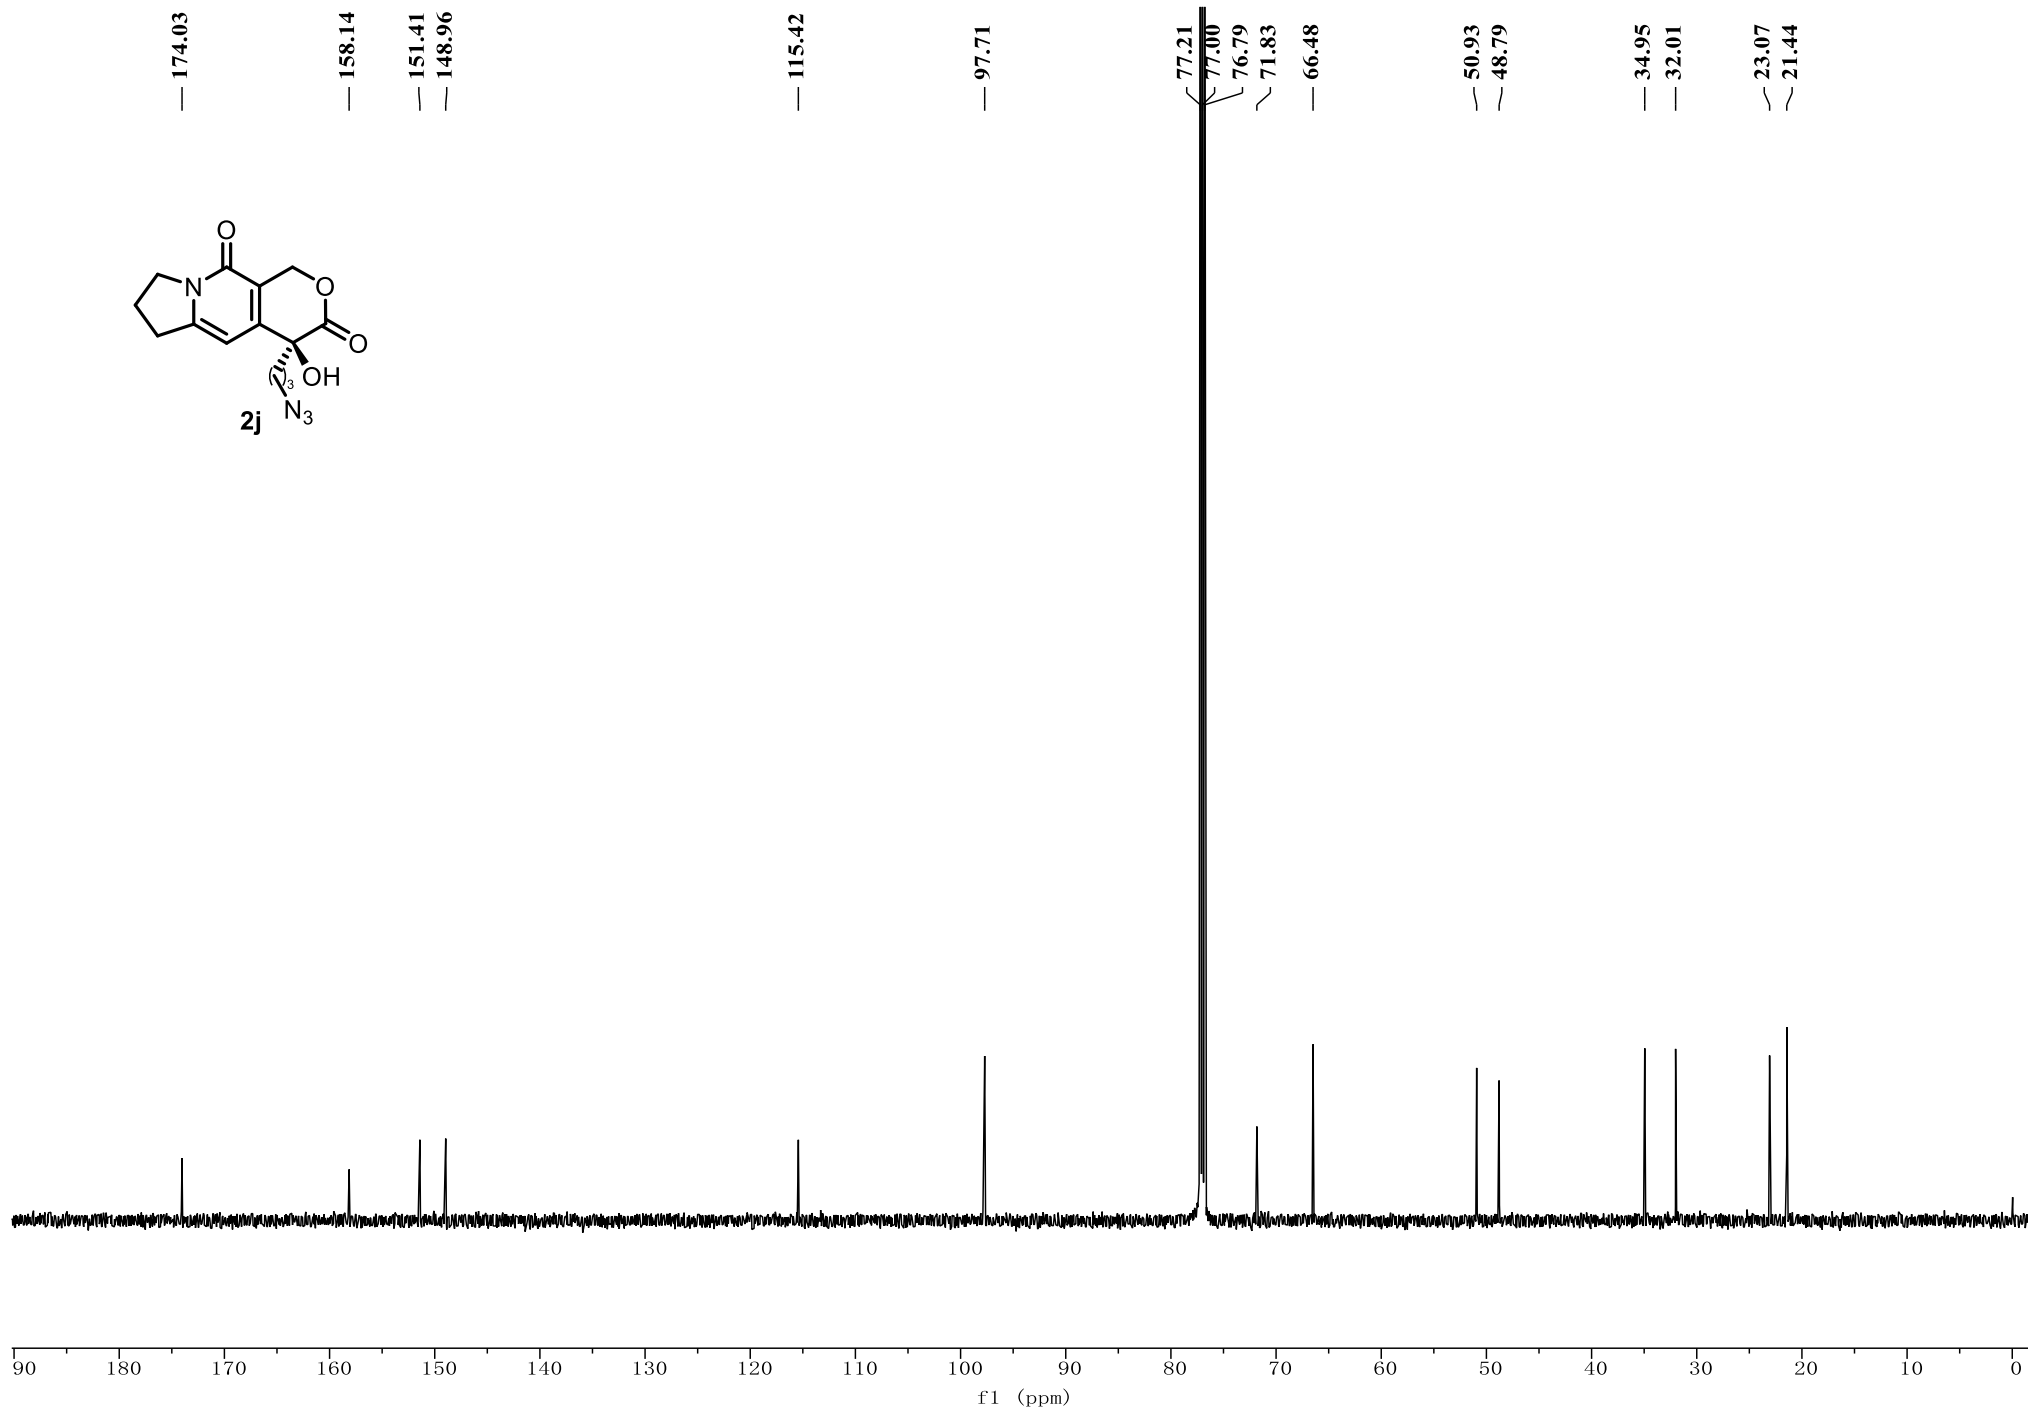

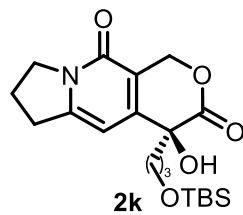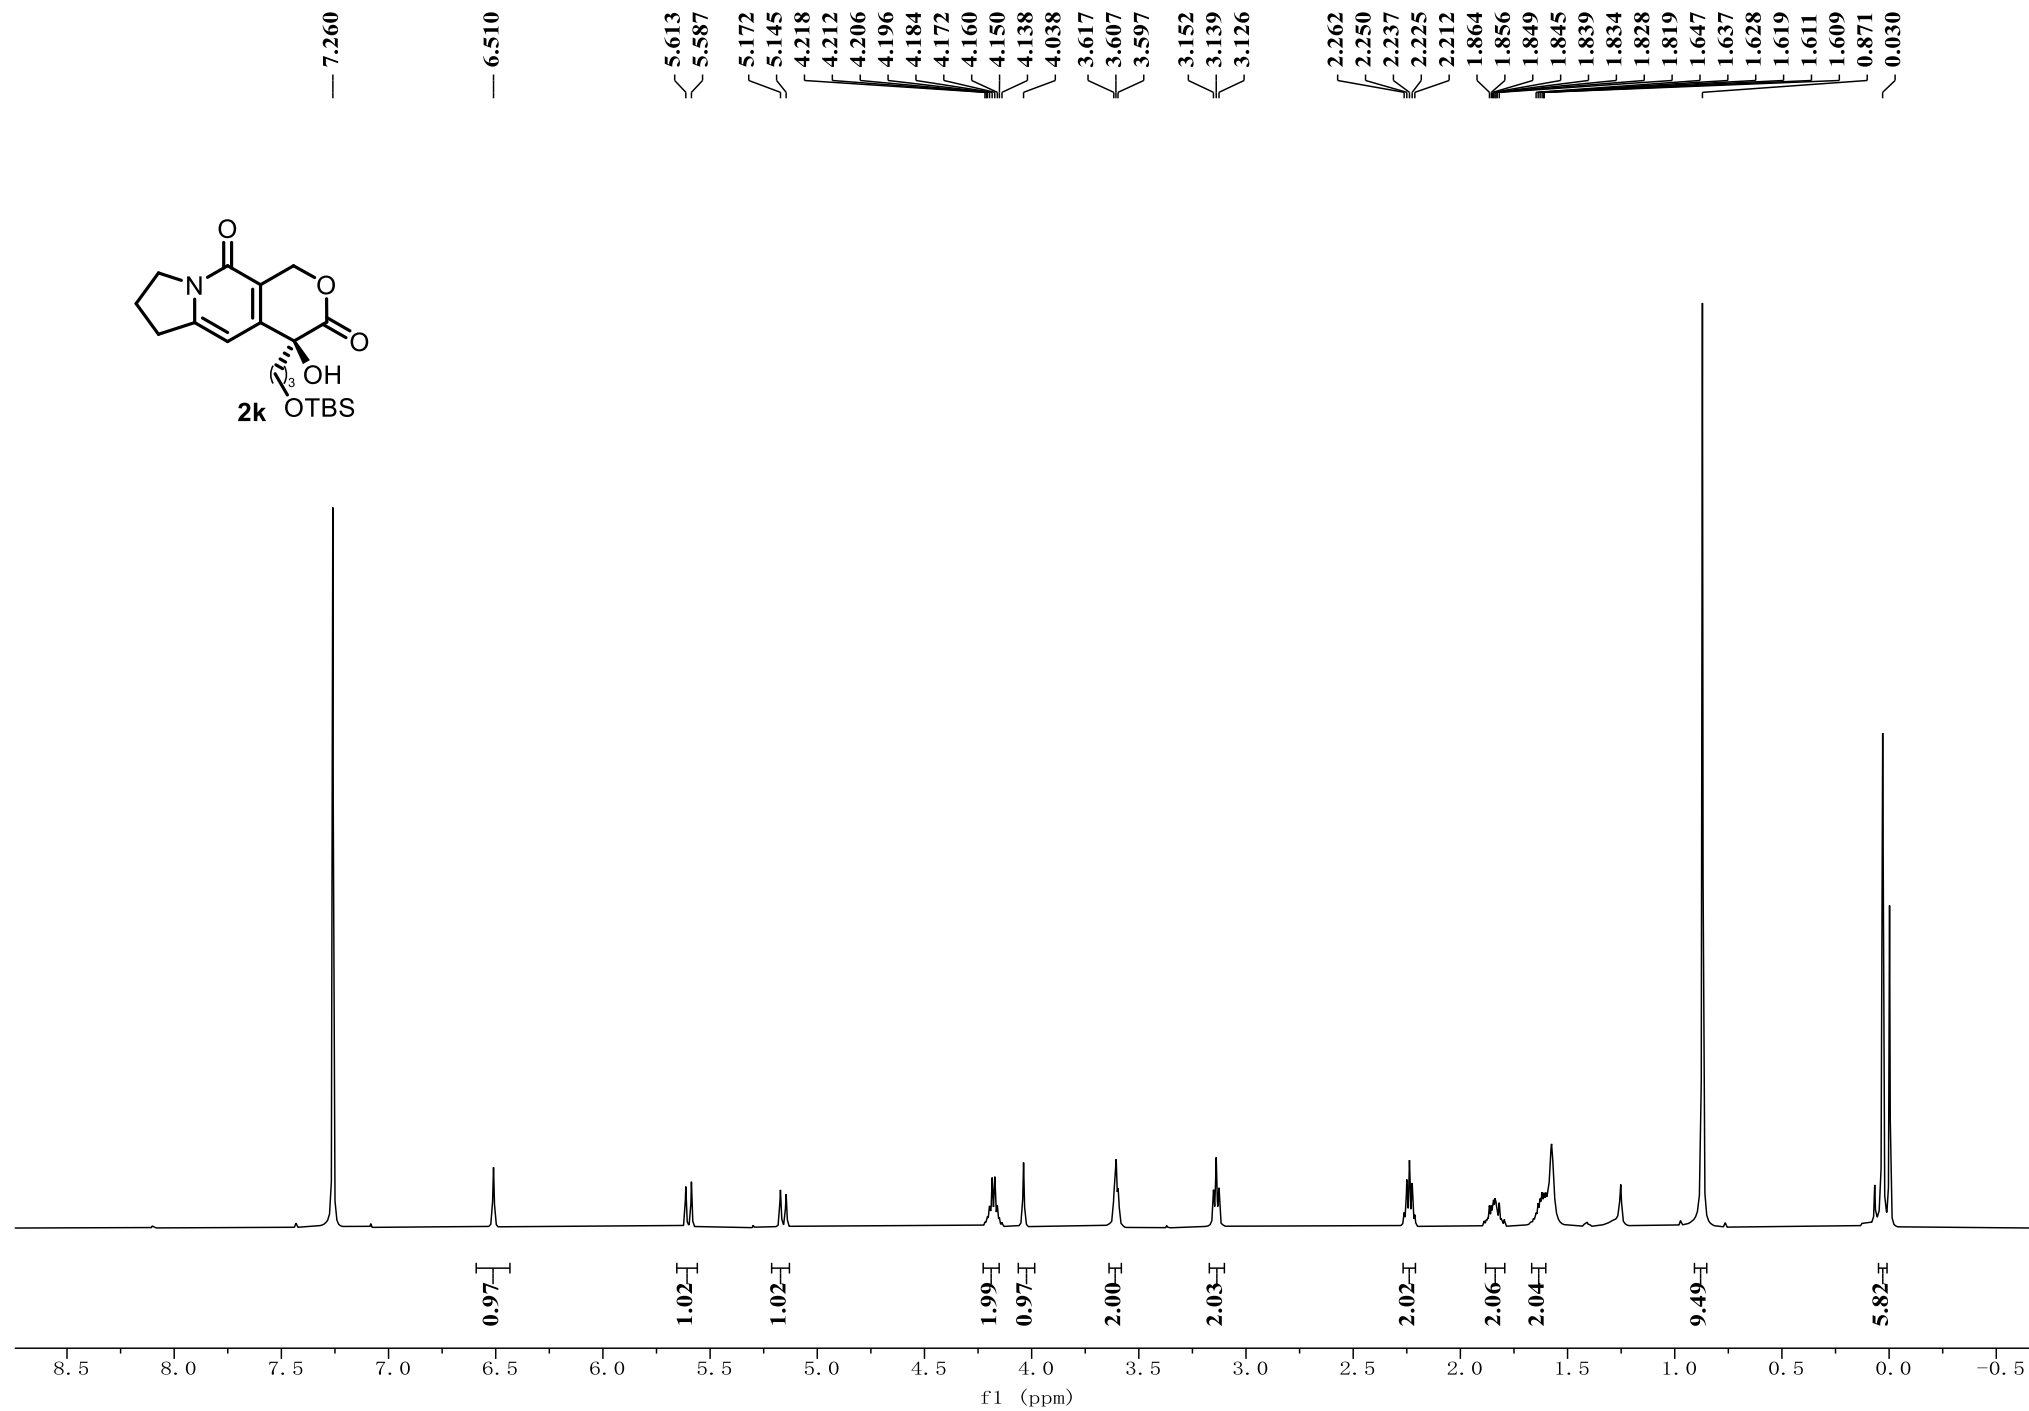

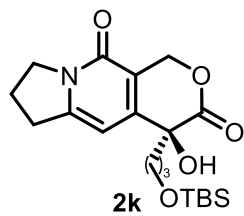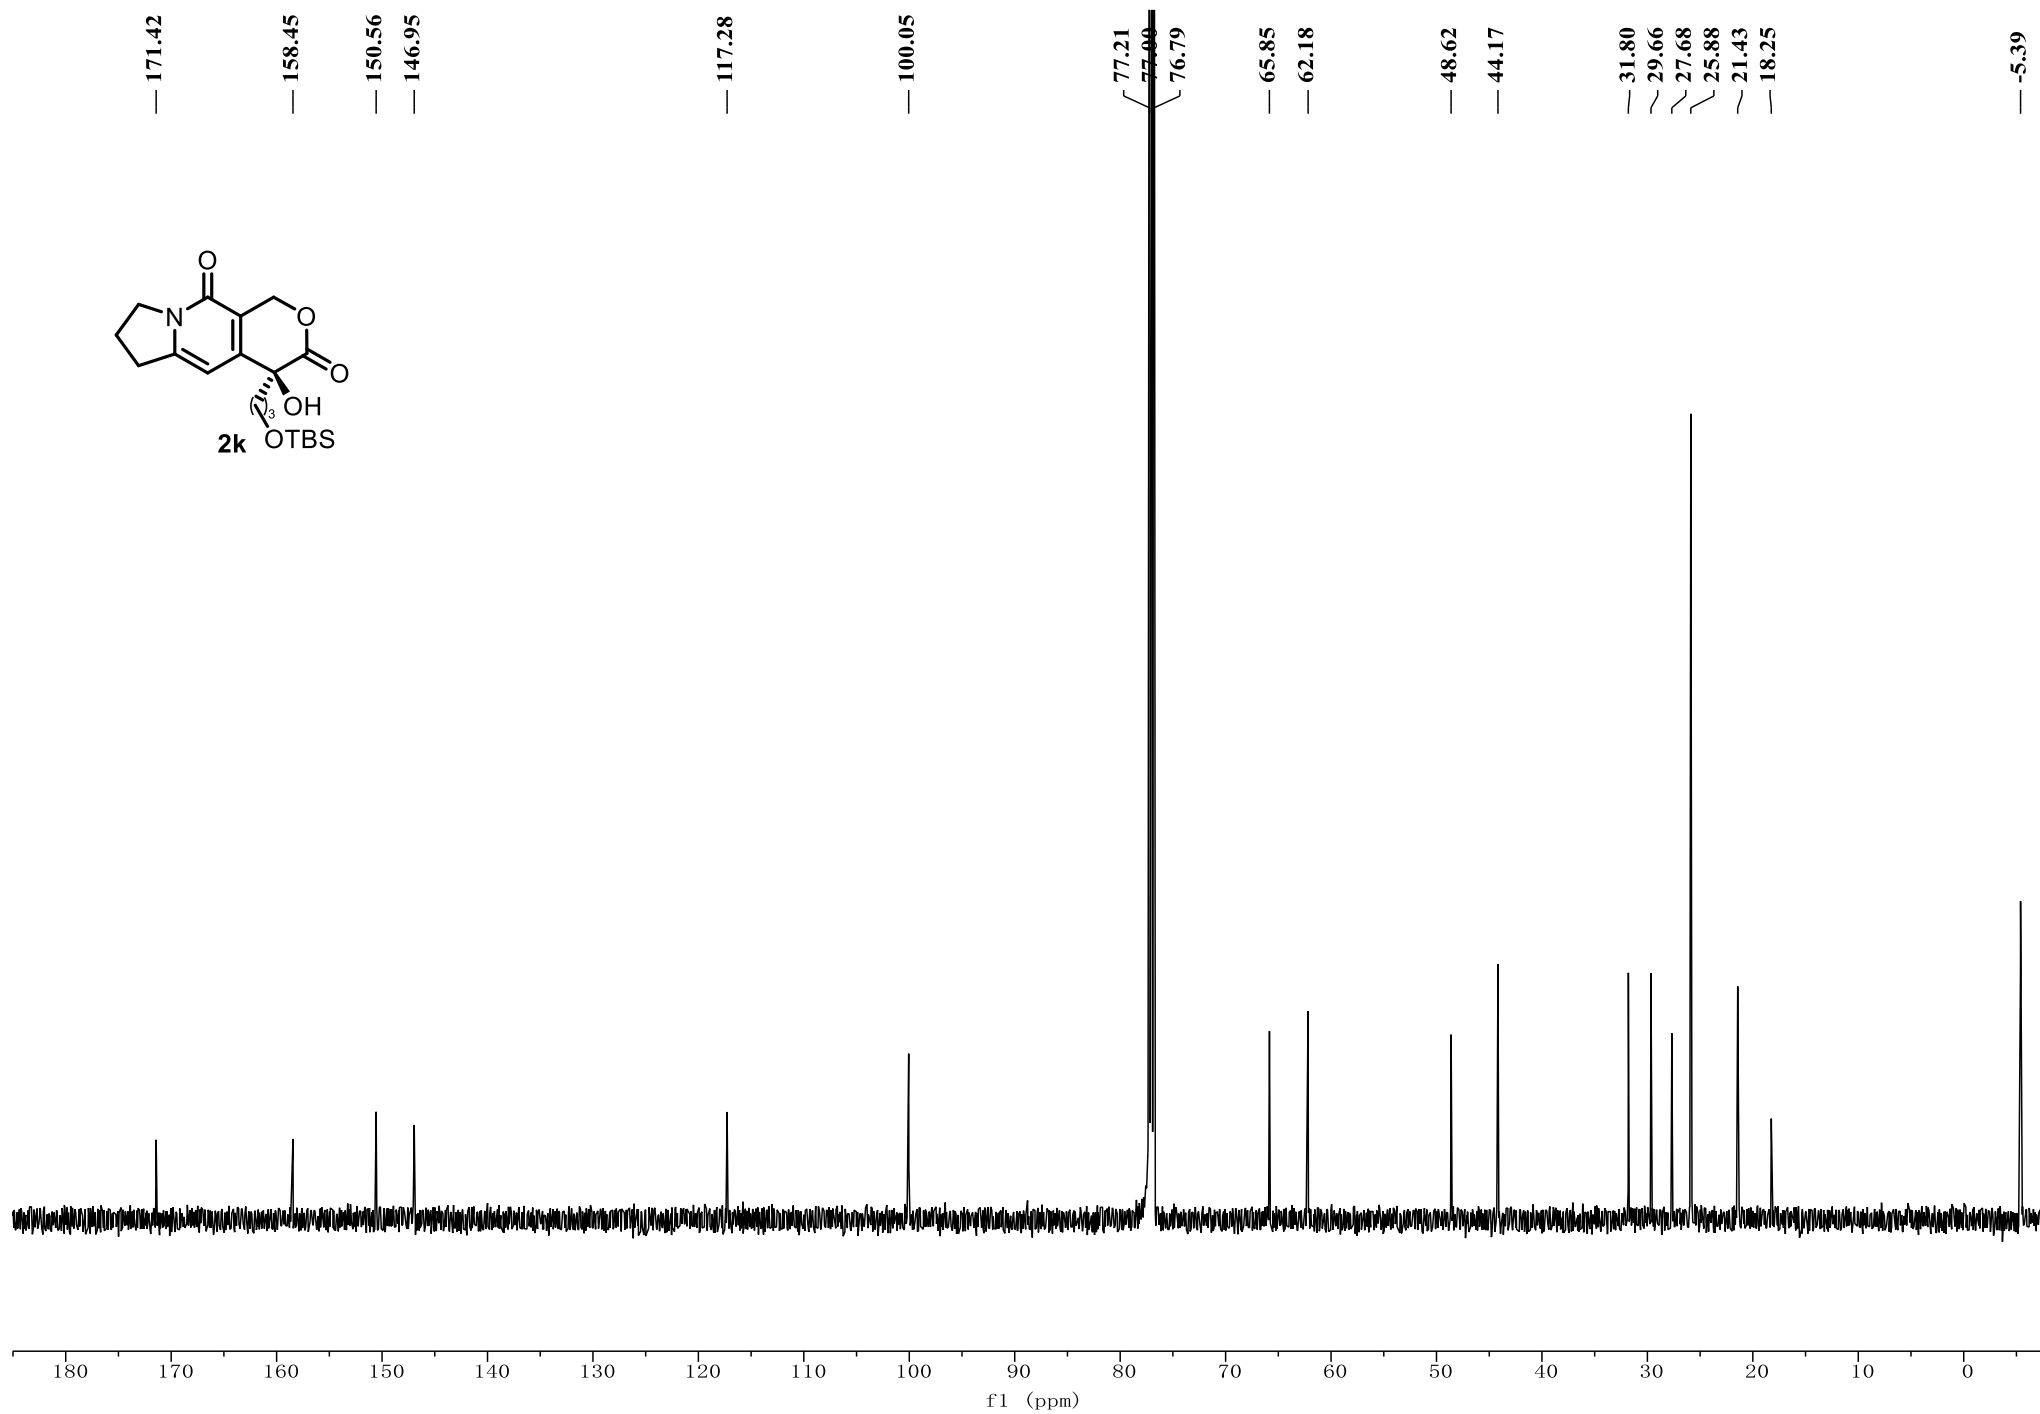

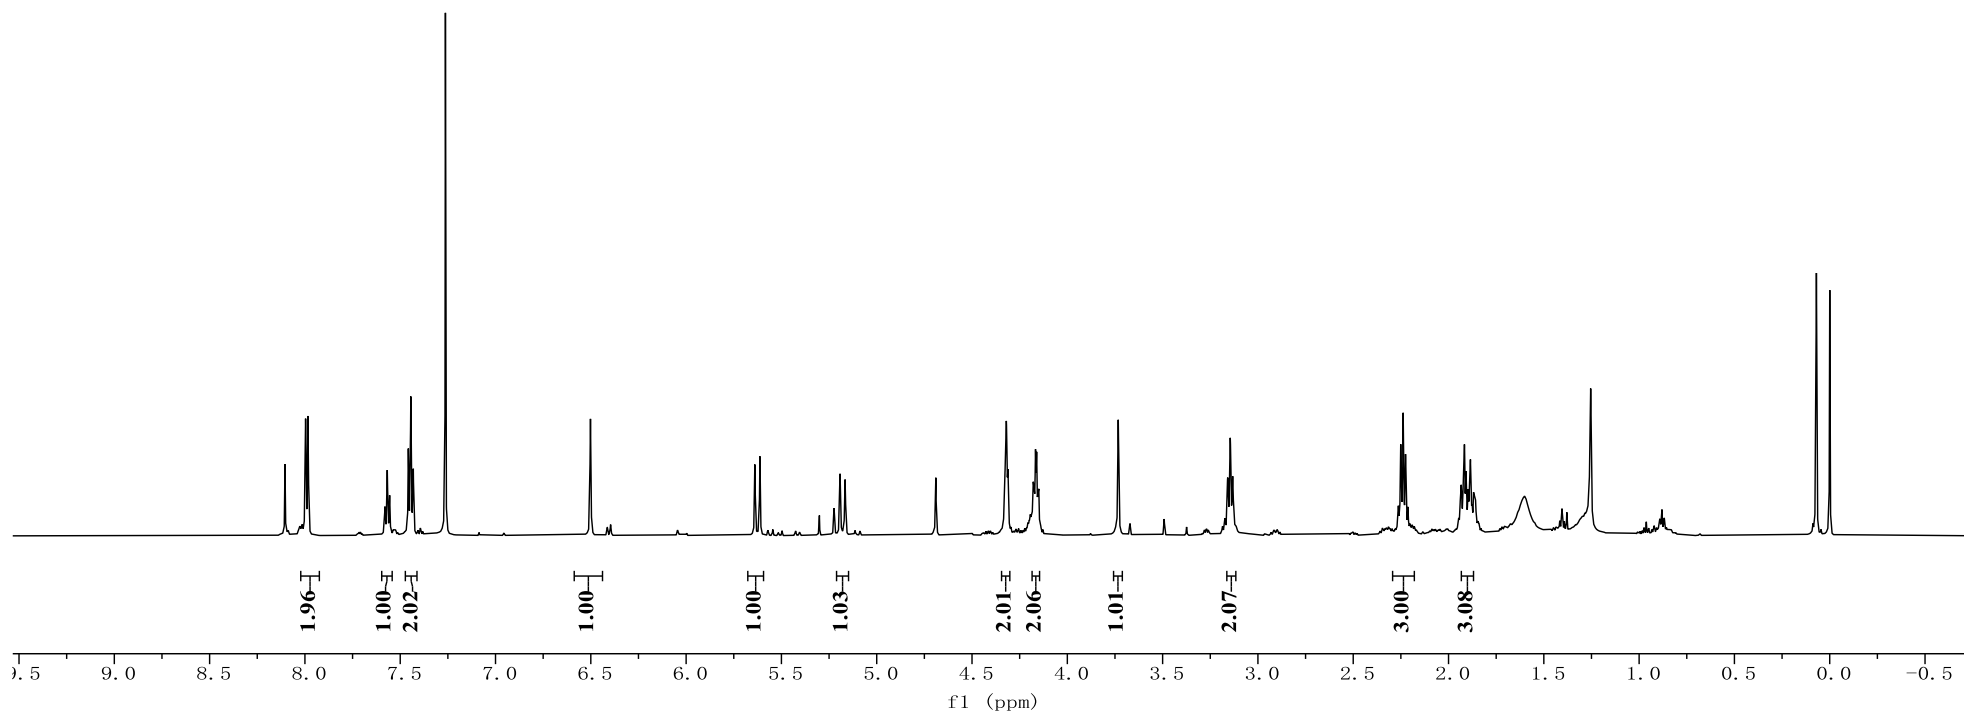

7.996  
7.985  
7.580  
7.568  
7.555  
7.457  
7.444  
7.431

— 6.502

5.639  
5.613  
5.192  
5.166  
4.326  
4.320  
4.312  
4.179  
4.174  
4.167  
4.161  
4.154  
4.150

— 3.733

3.159  
3.145  
3.132  
2.263  
2.251  
2.238  
2.226  
2.213  
1.946  
1.938  
1.933  
1.921  
1.916  
1.909  
1.897  
1.885  
1.869  
1.858

— 0.000

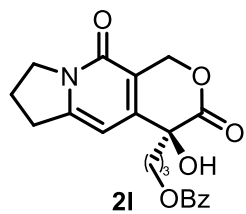

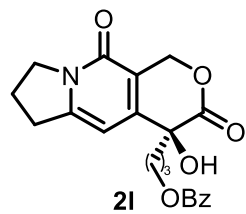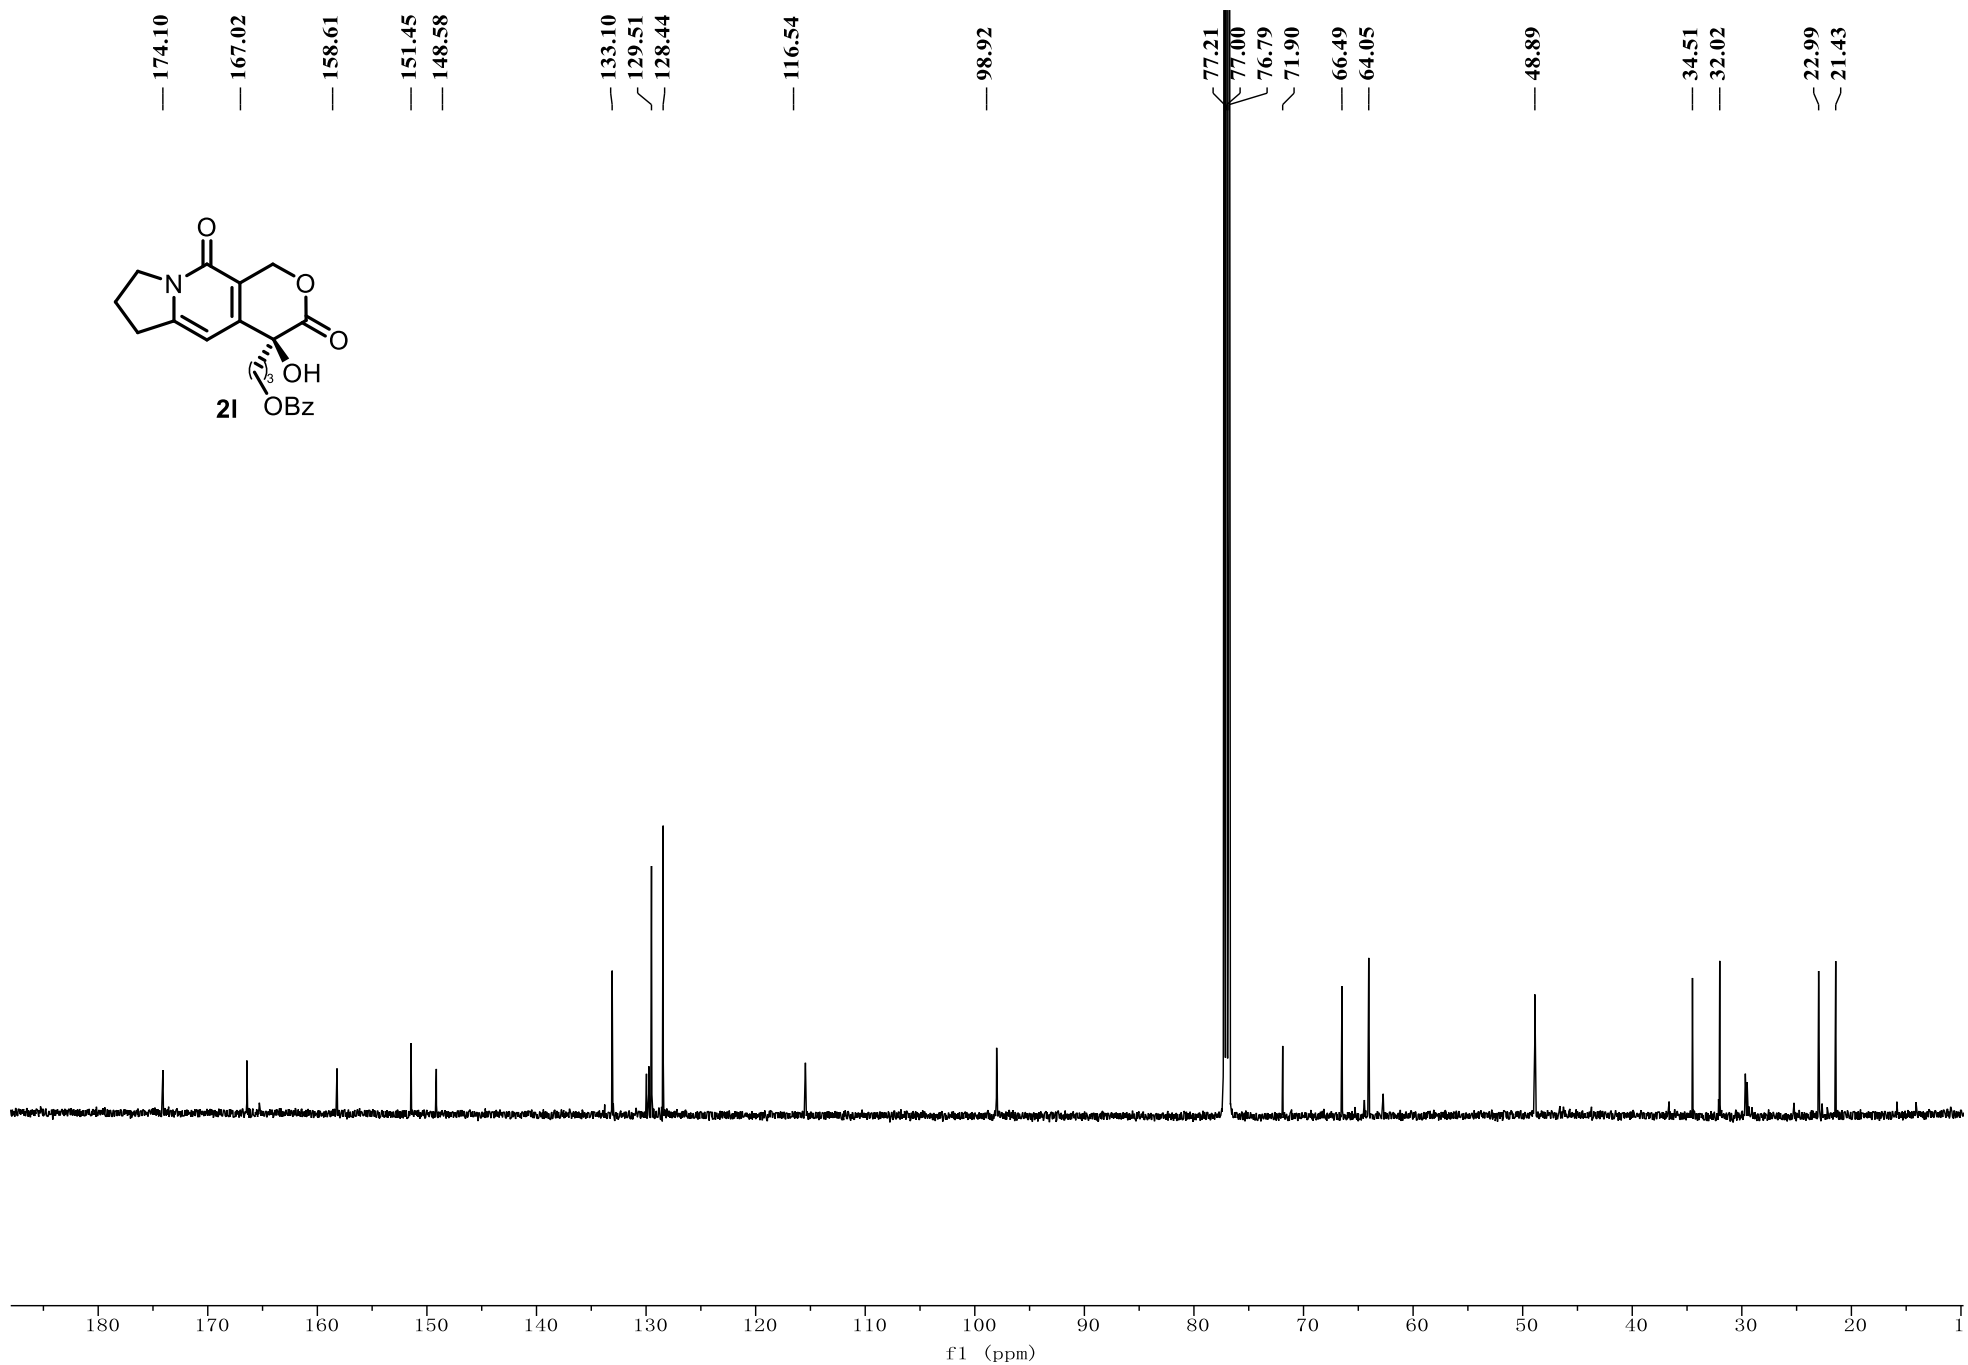

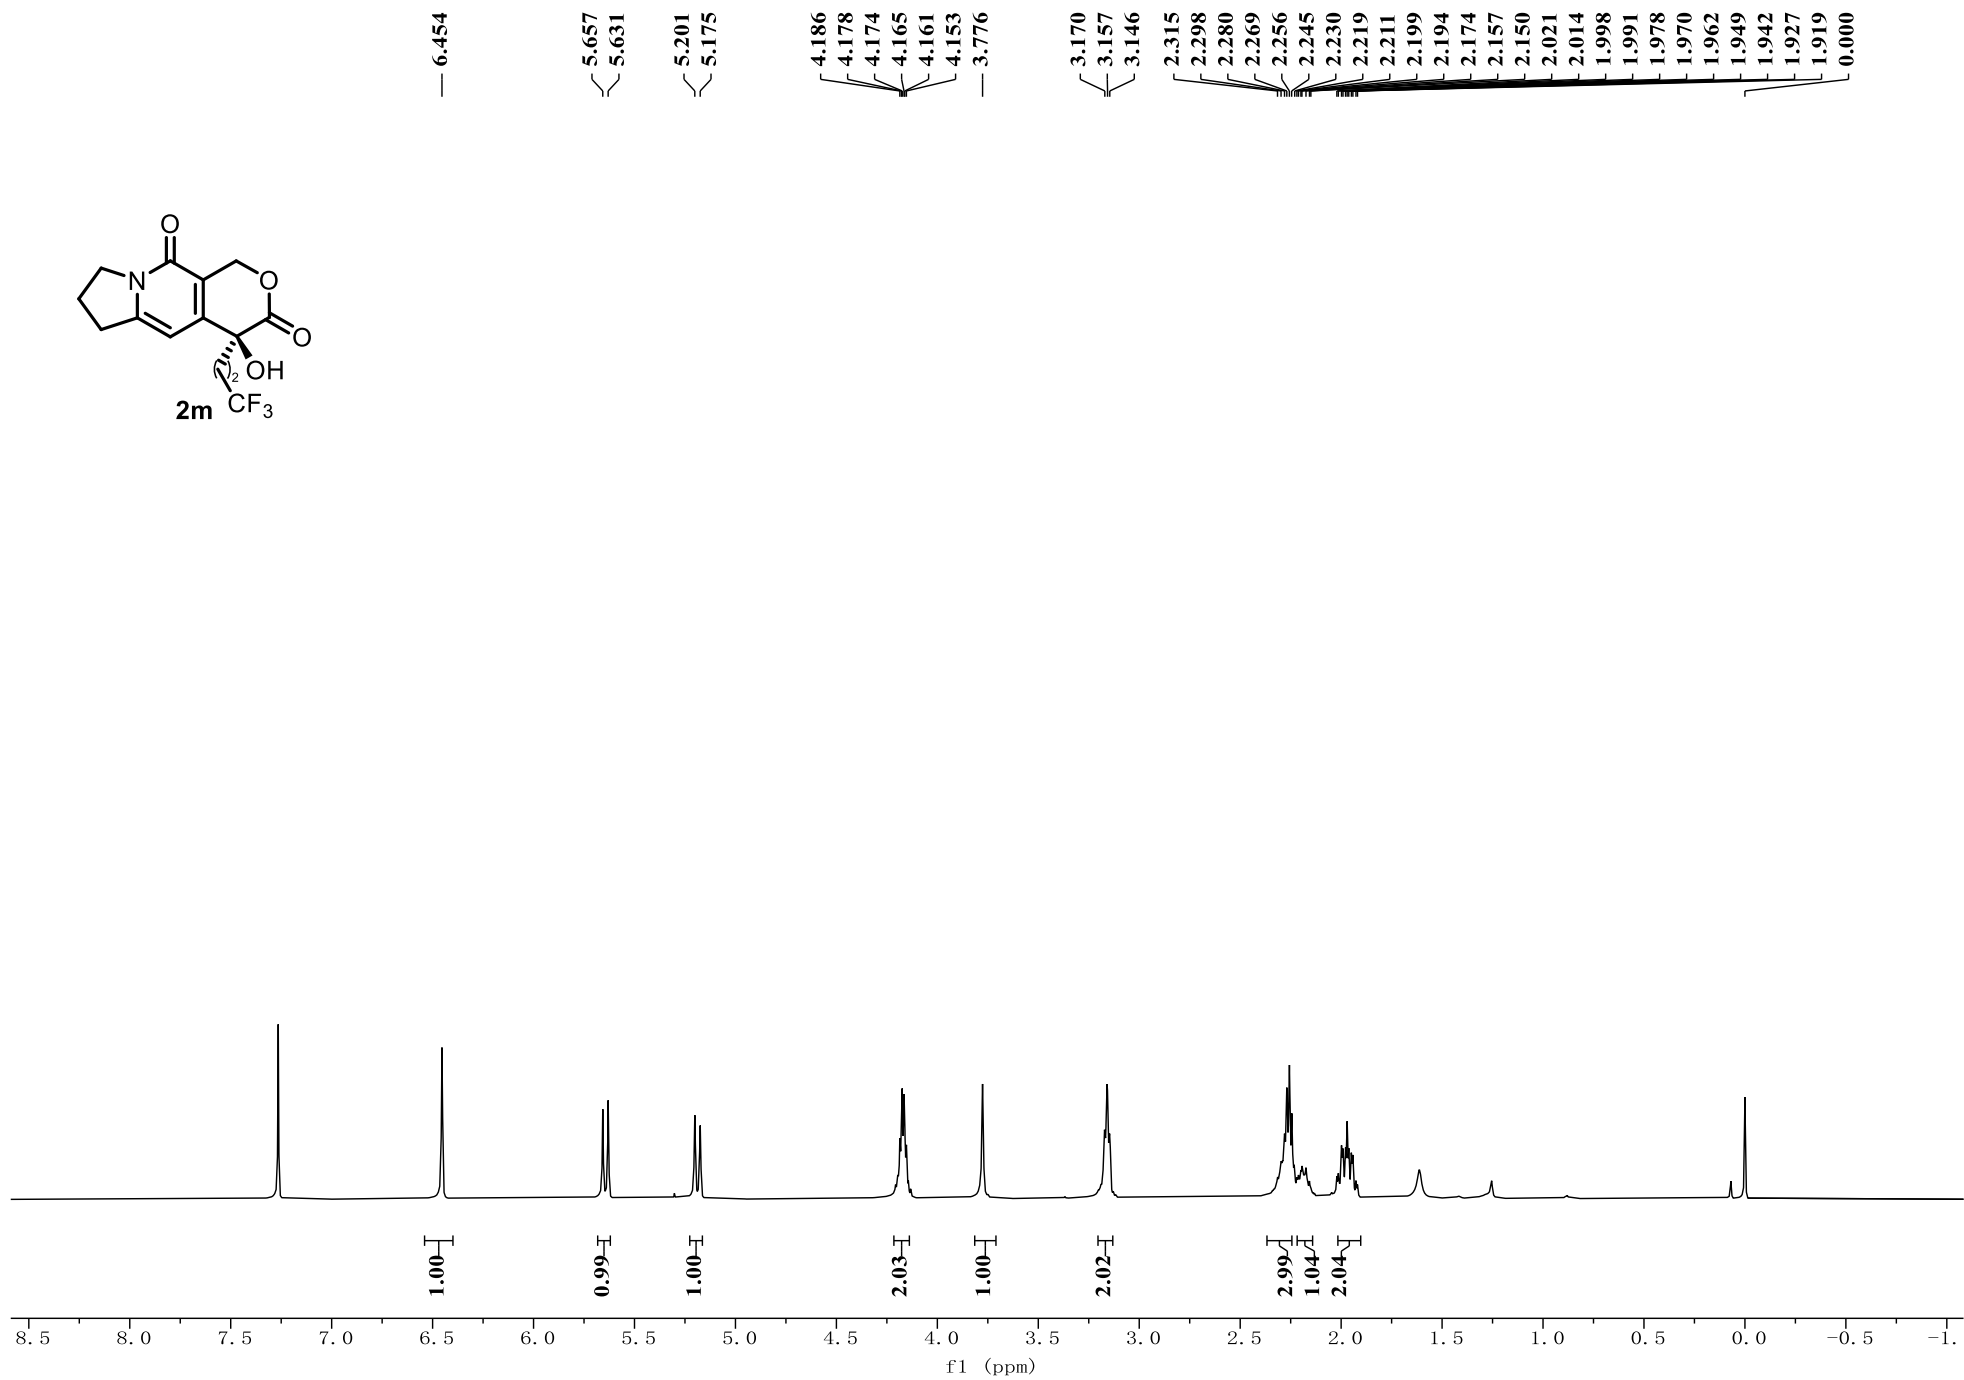

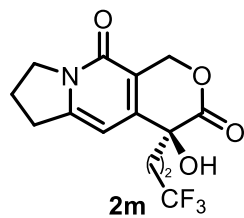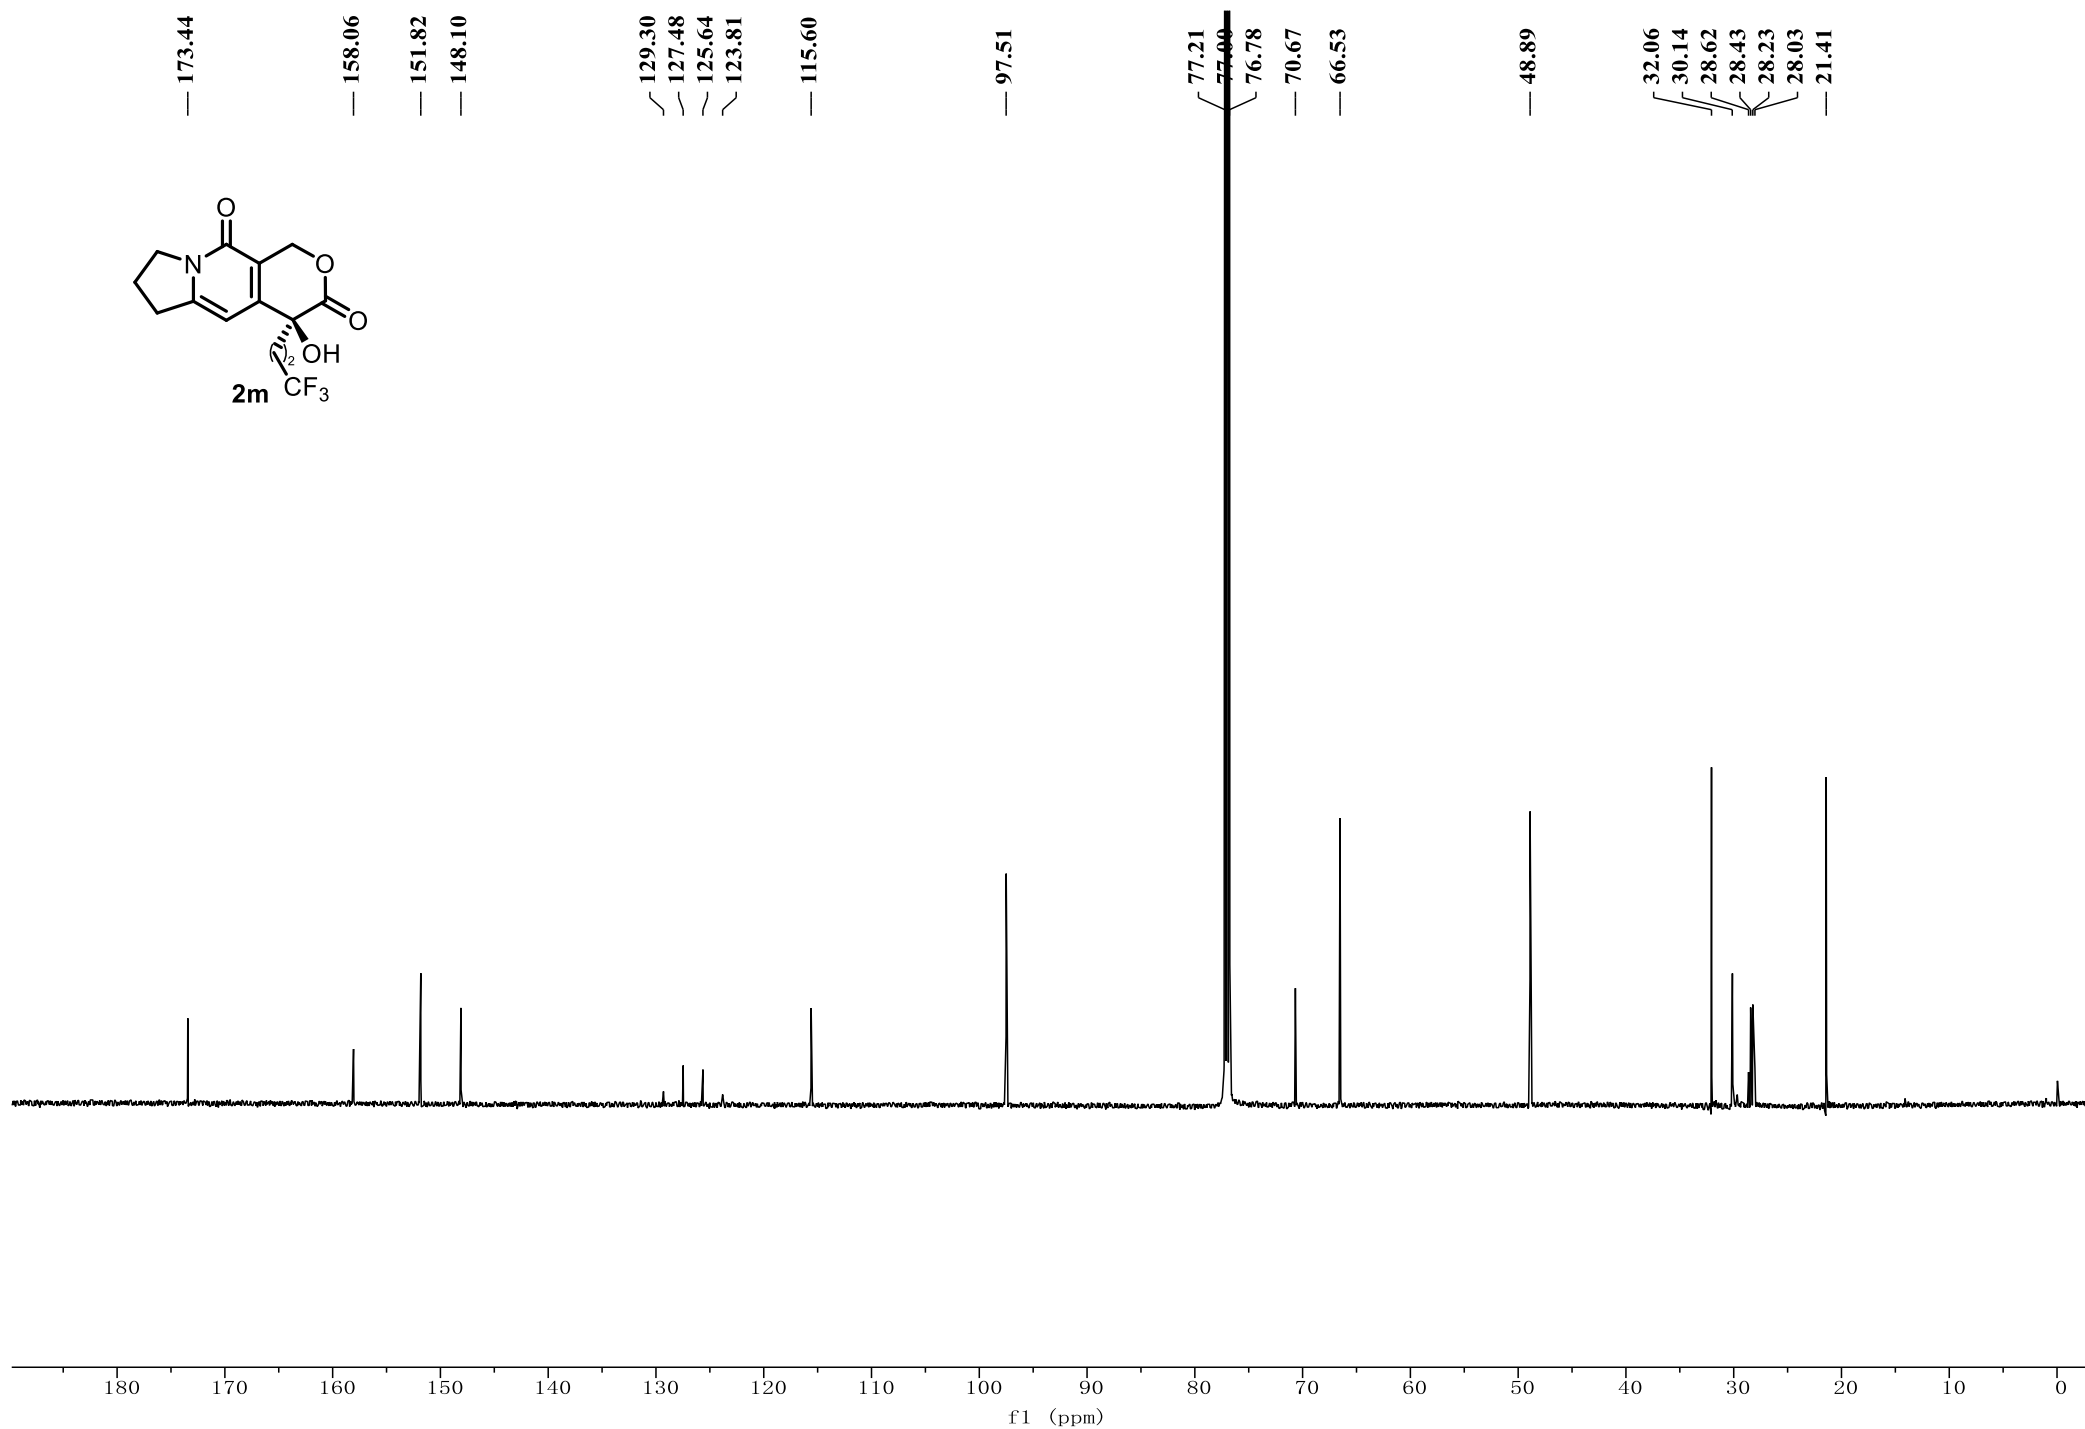

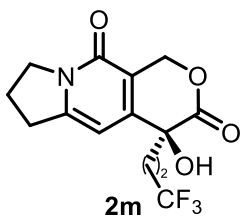

-66.15  
-66.16  
-66.18

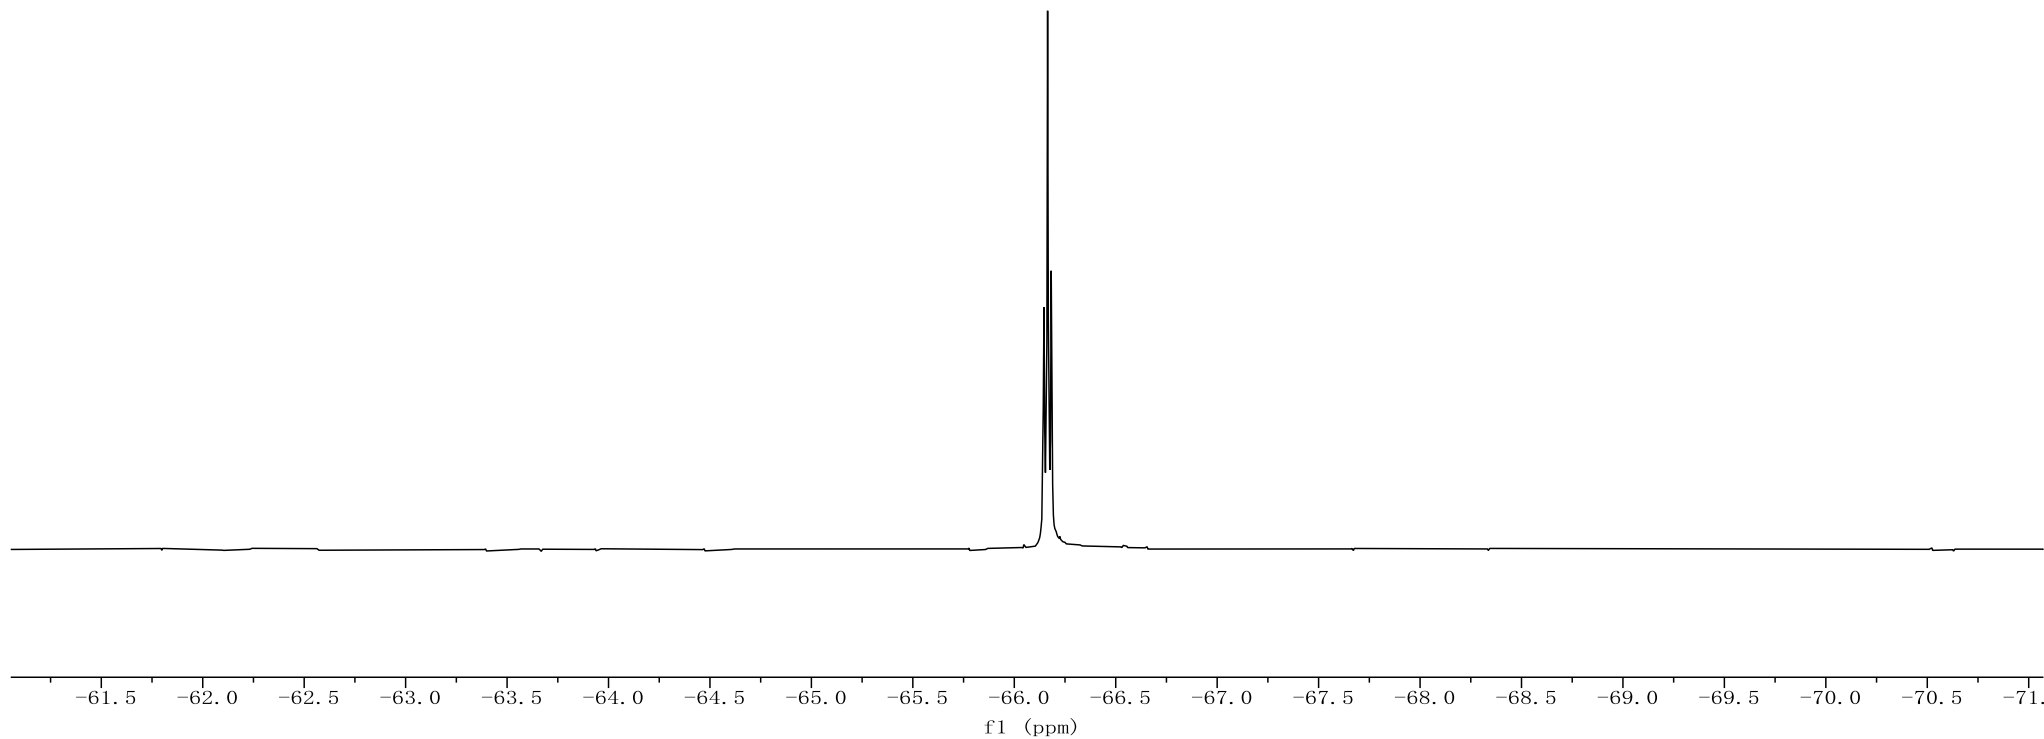

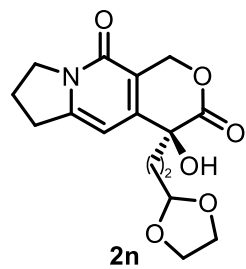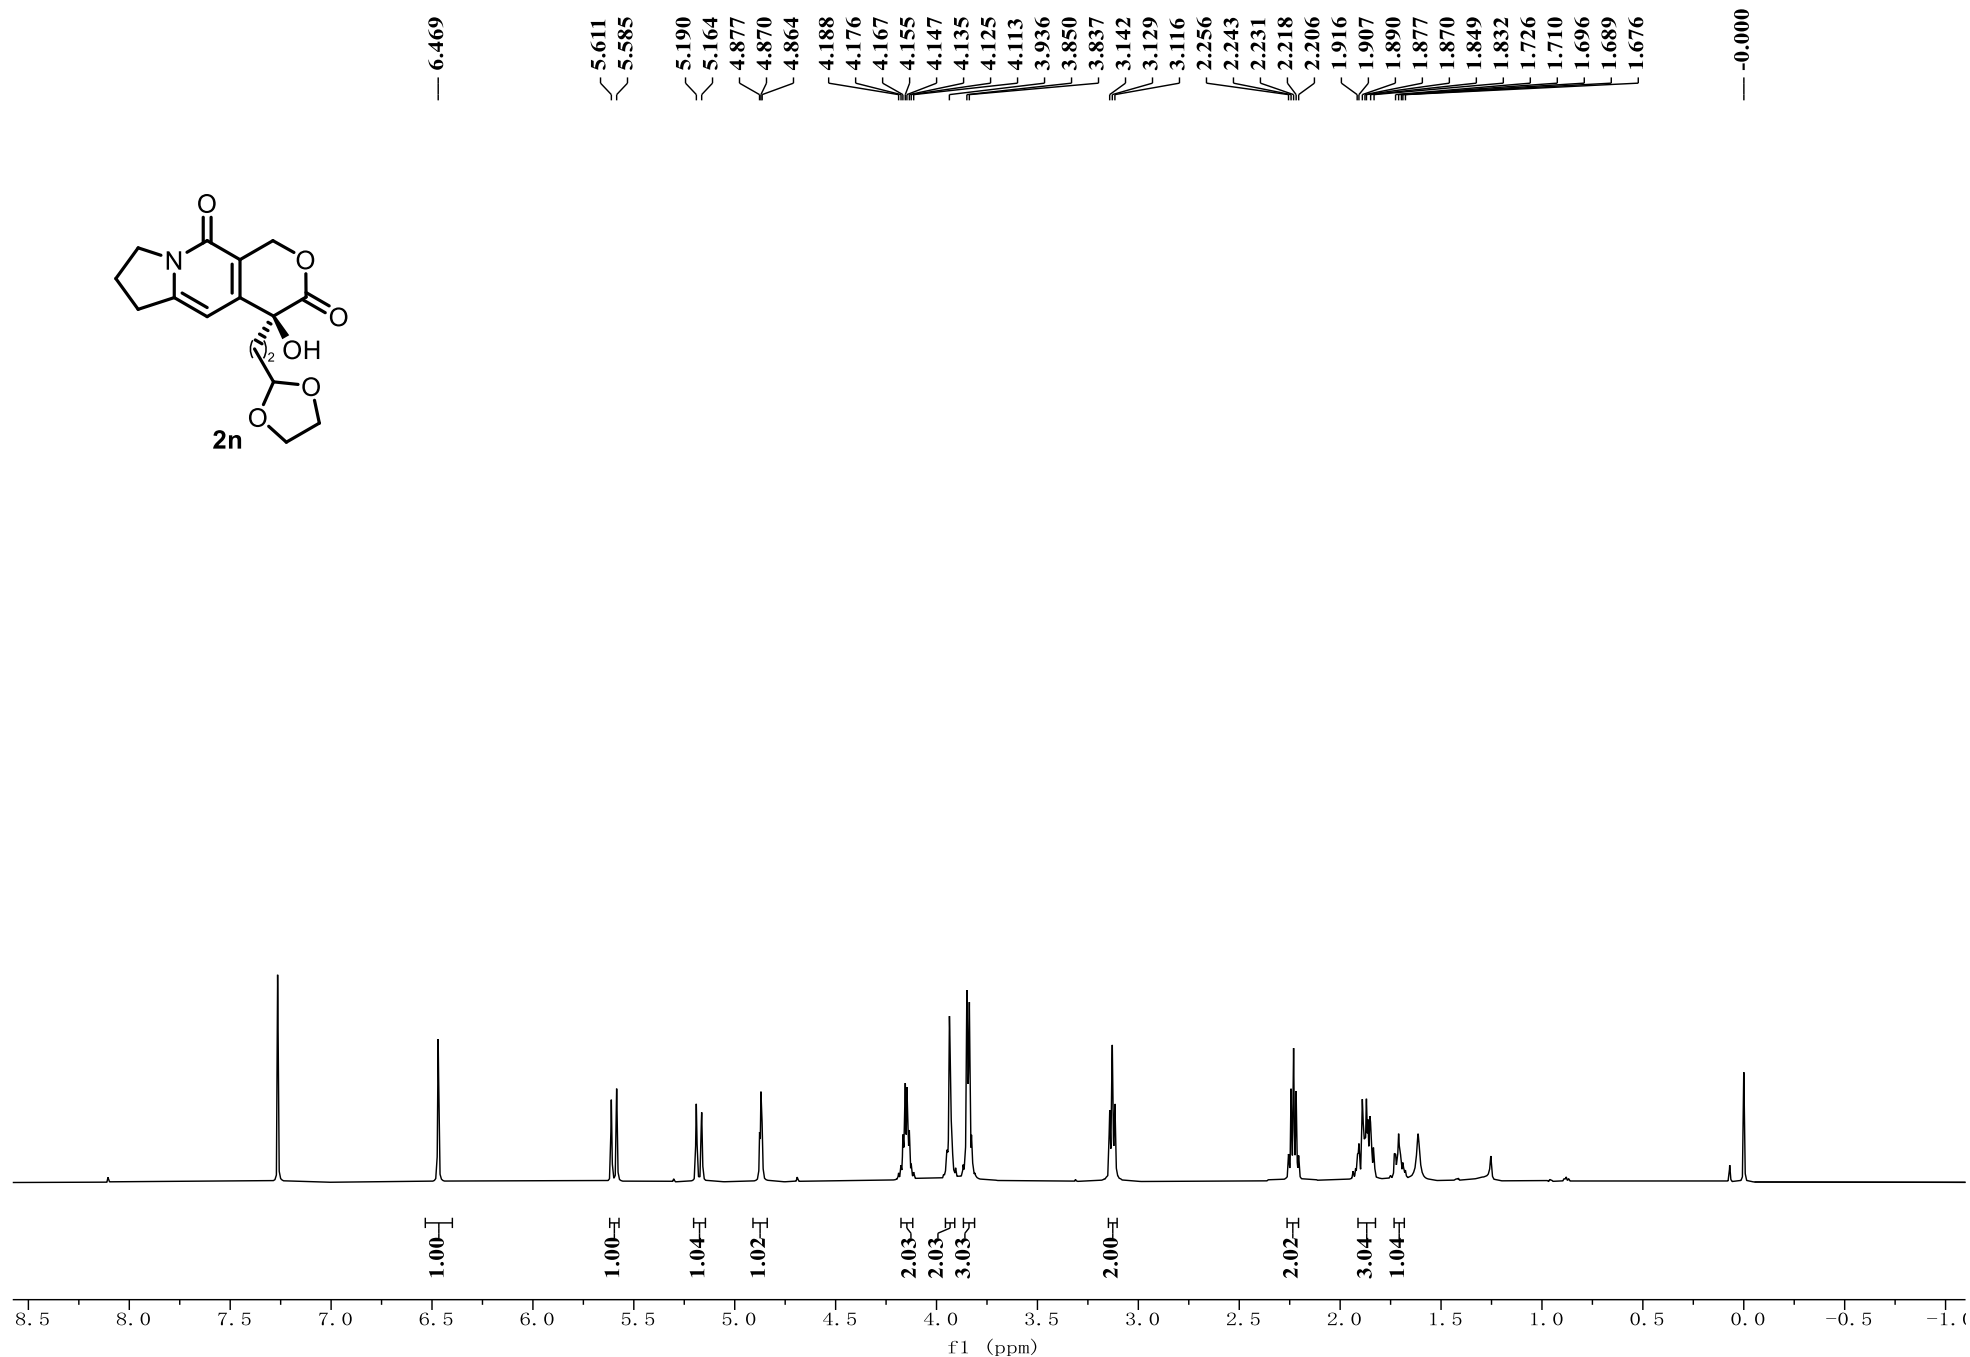

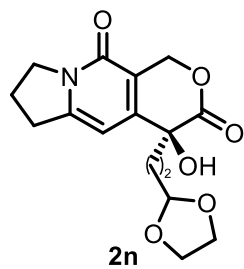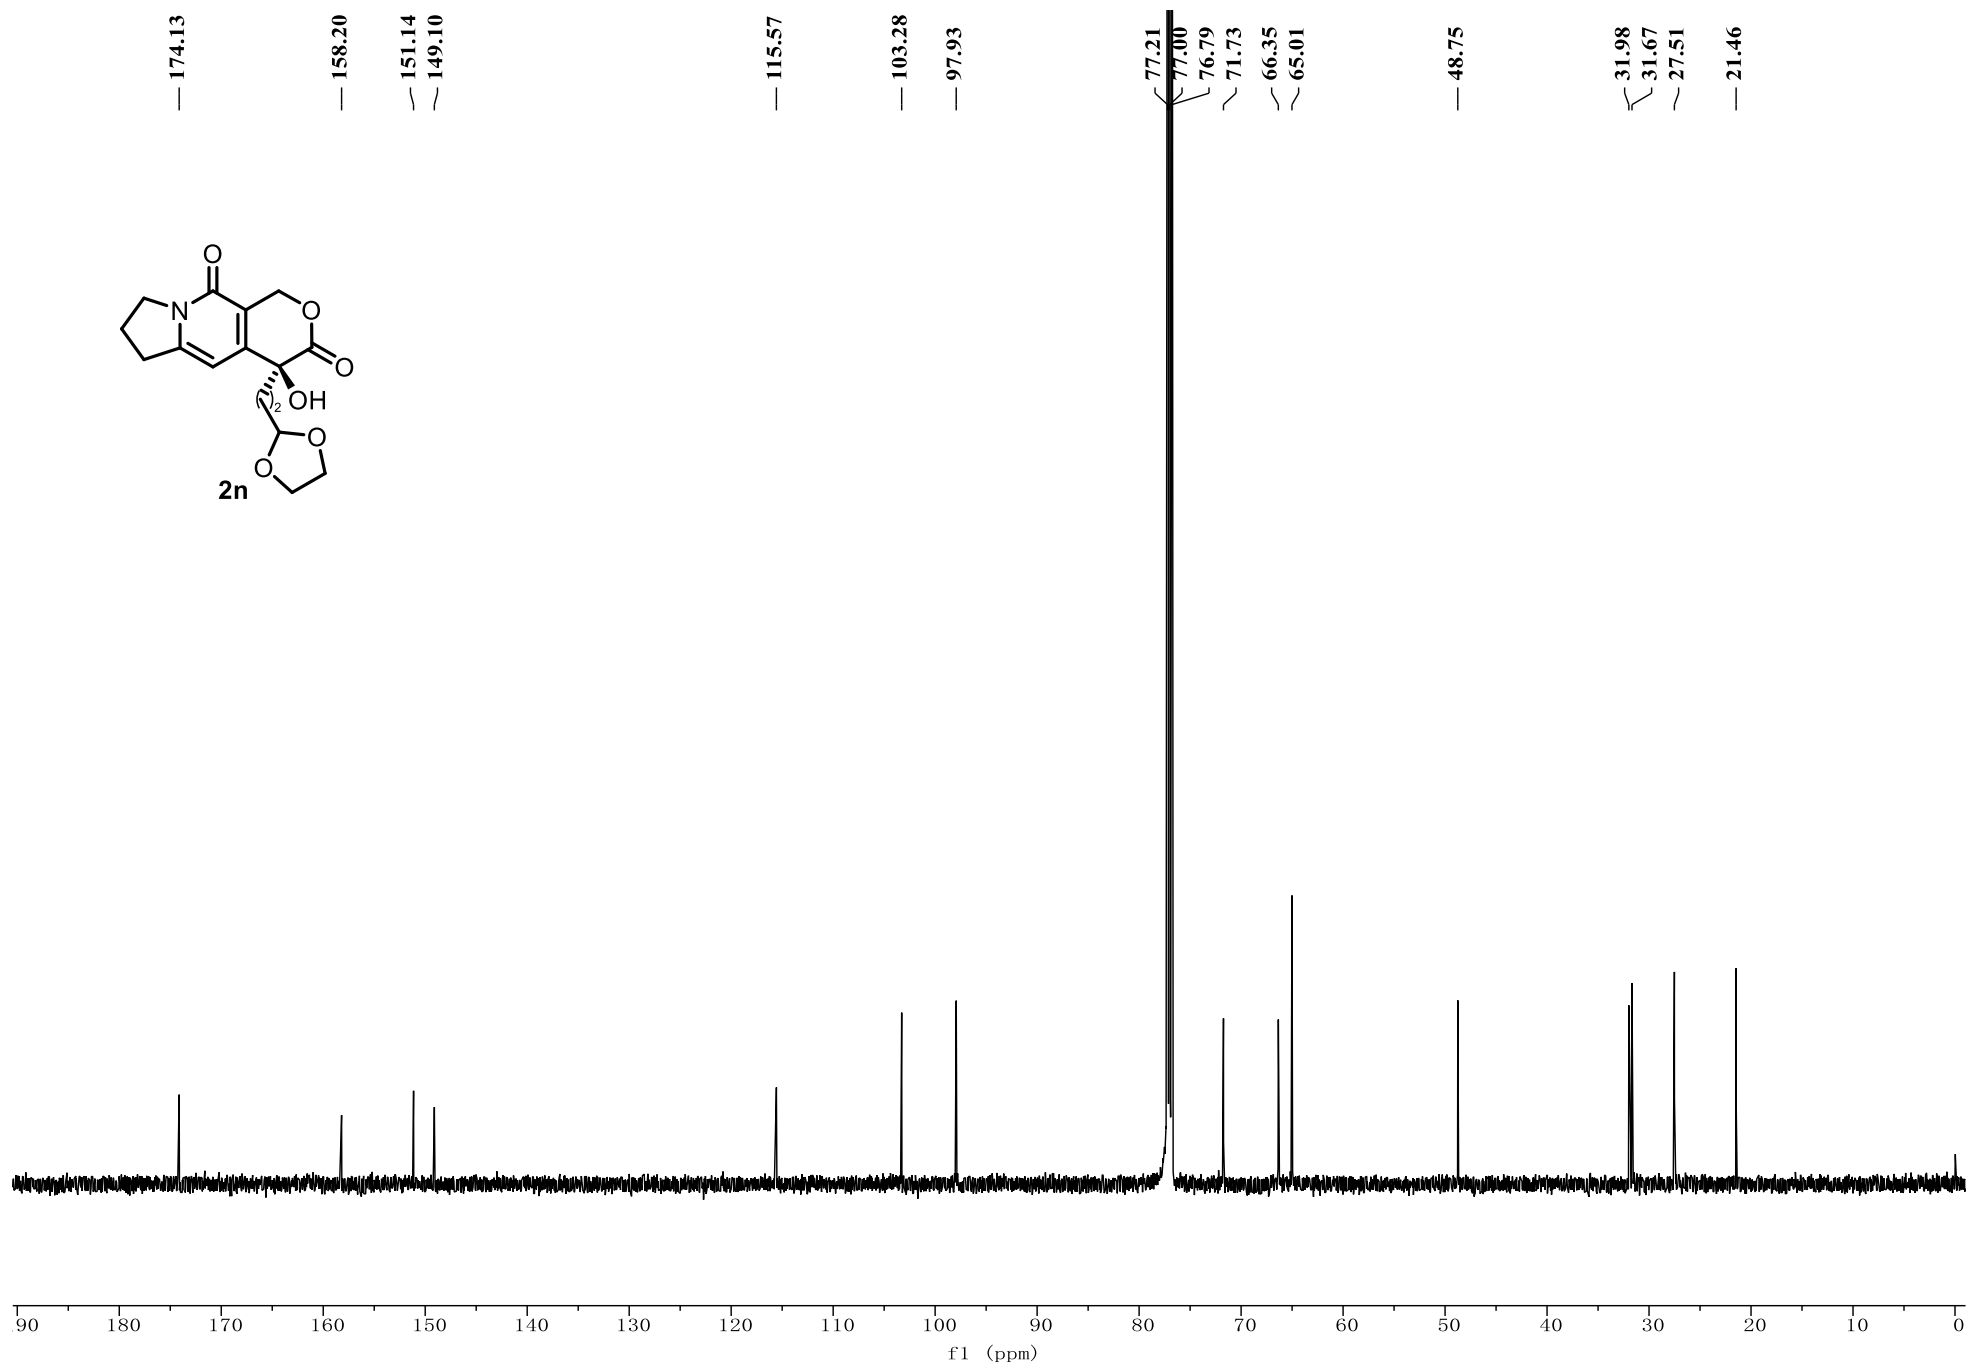

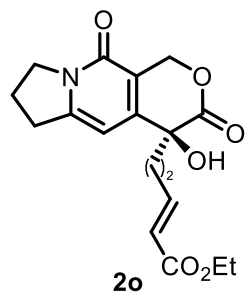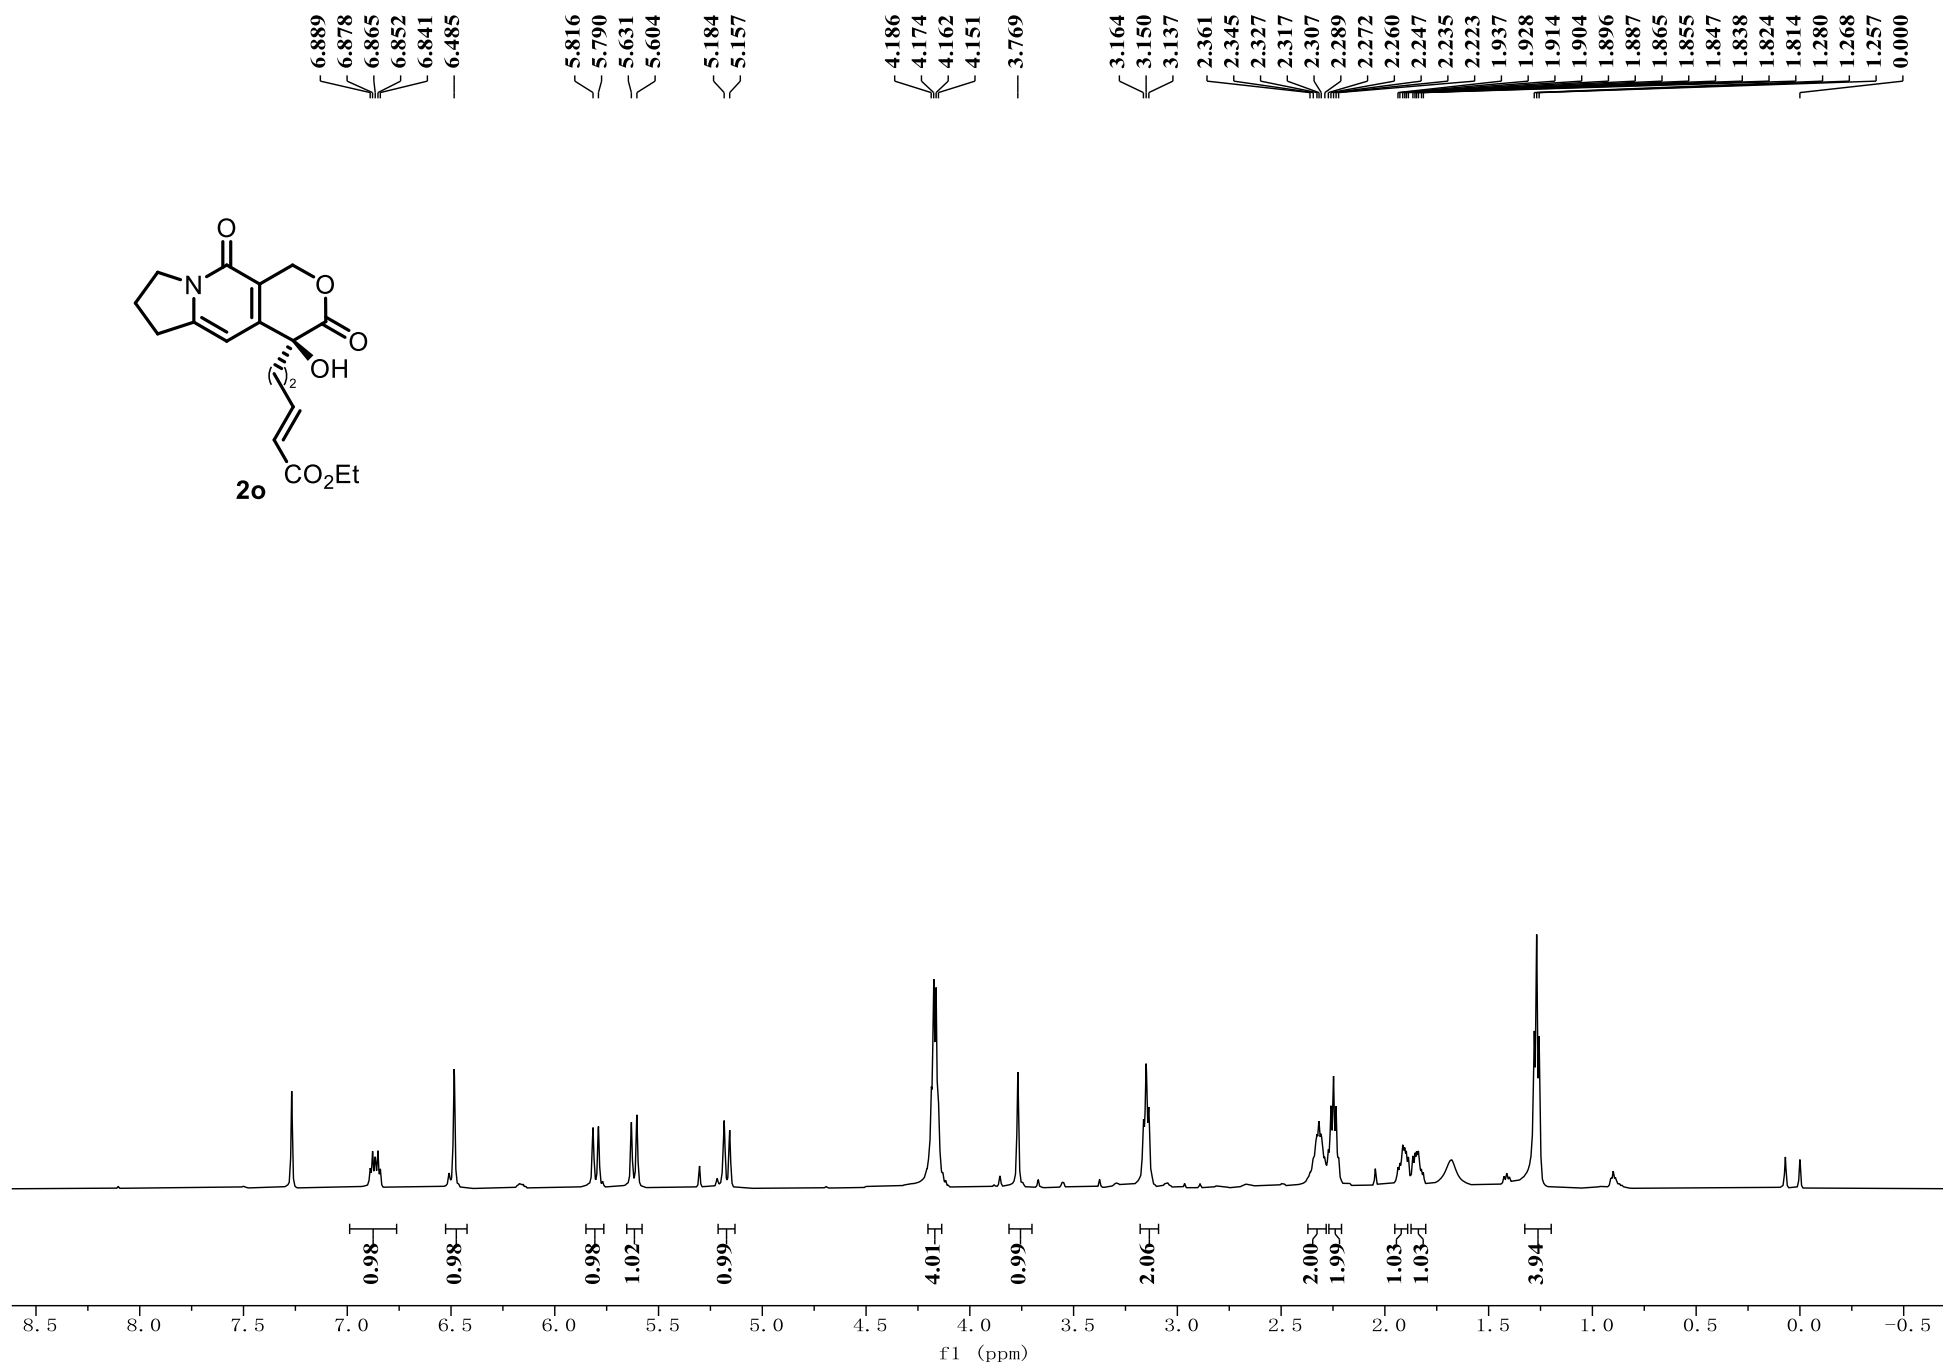

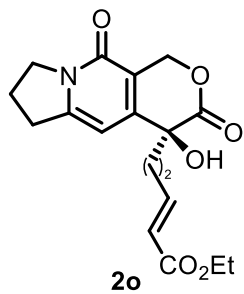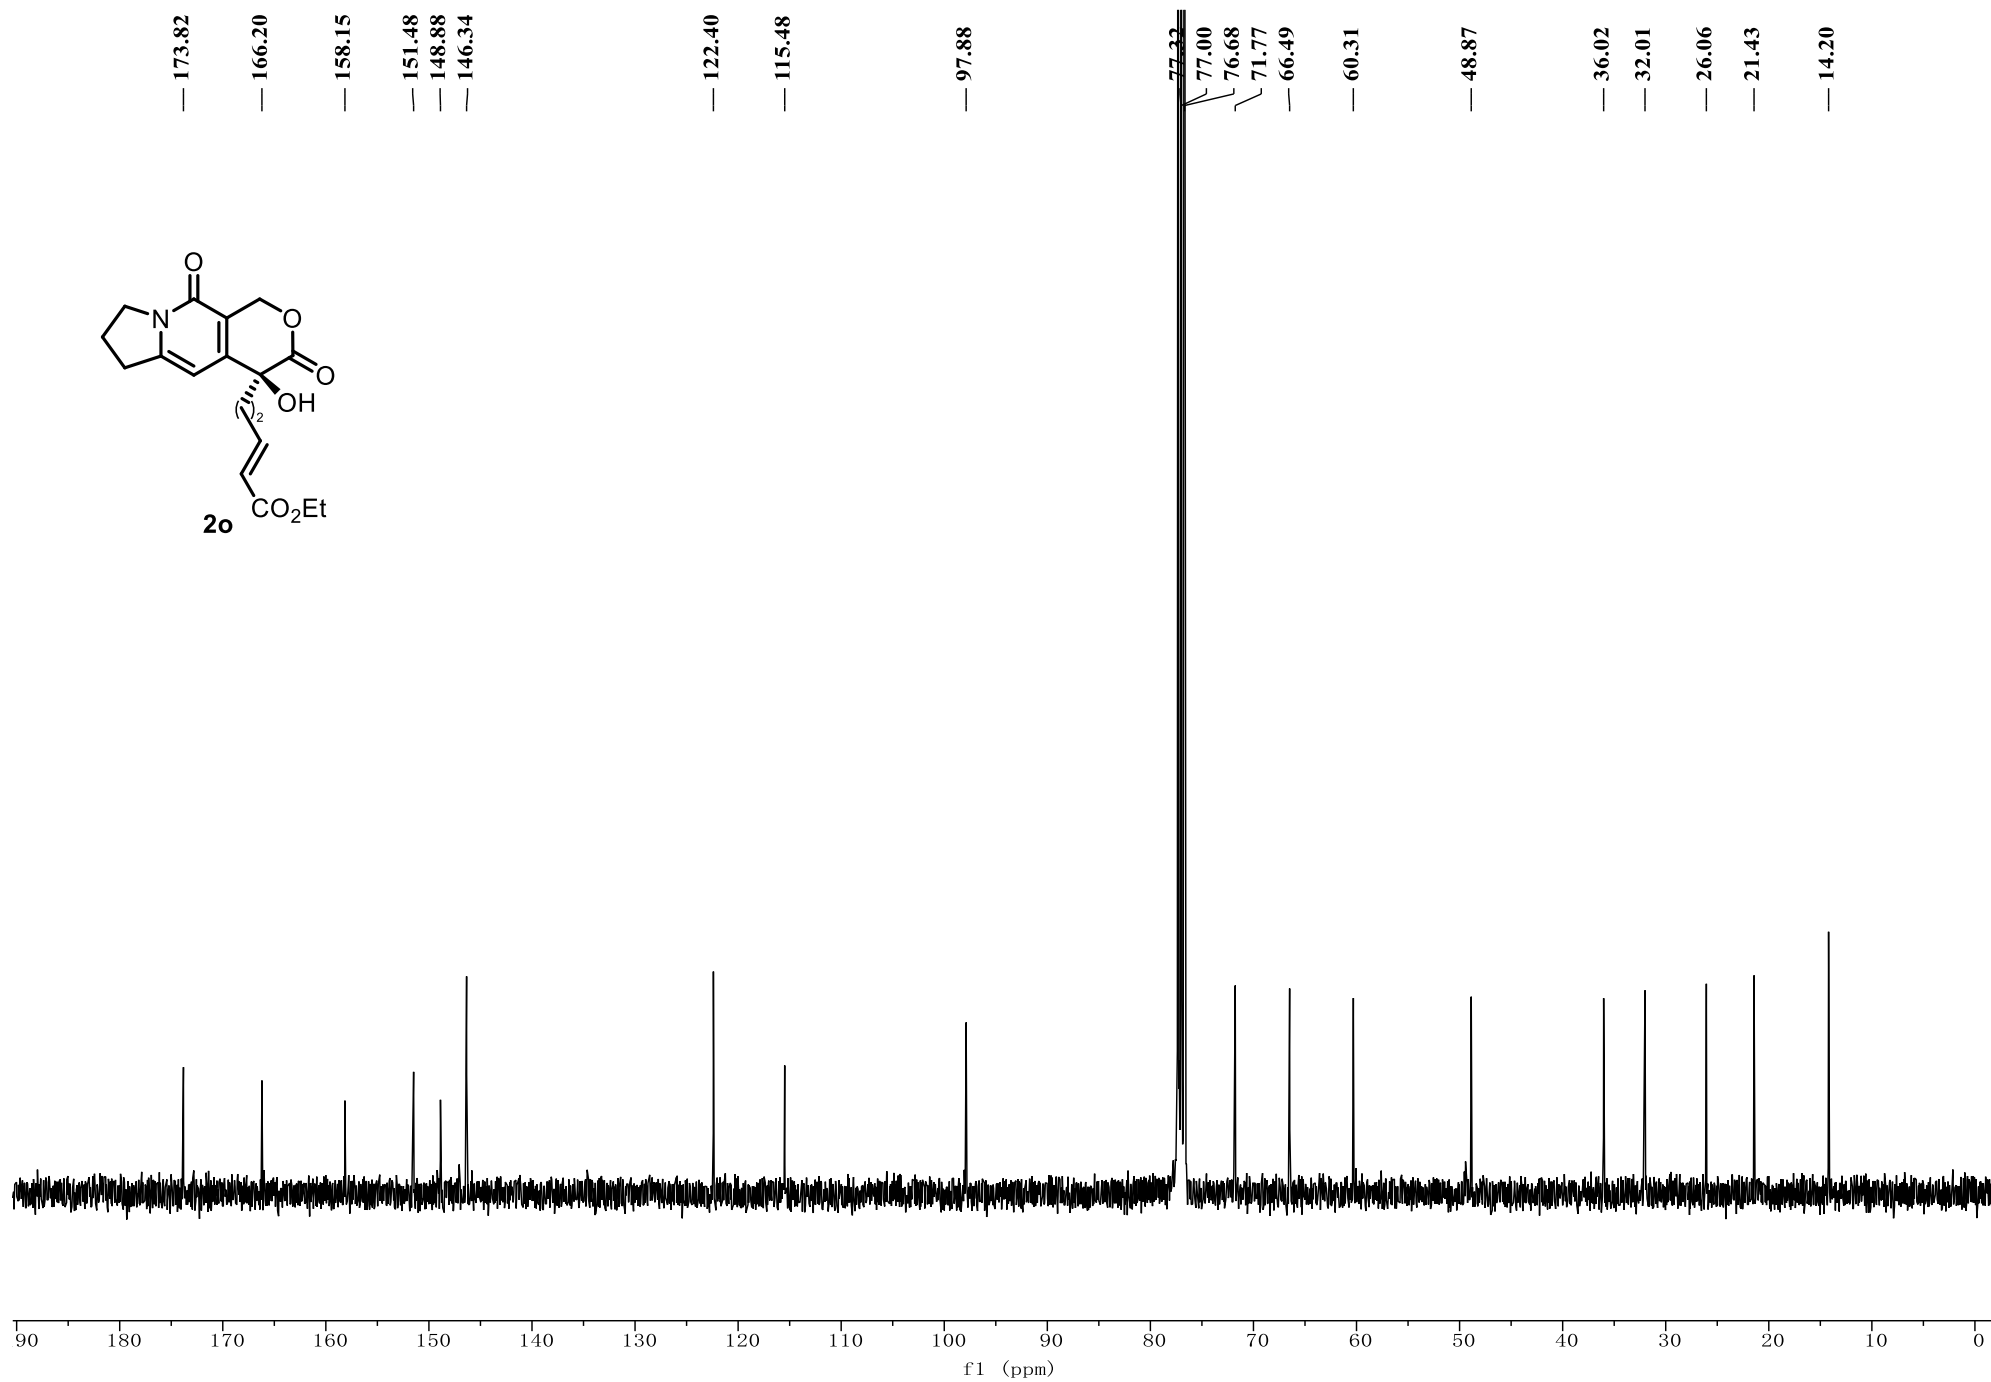

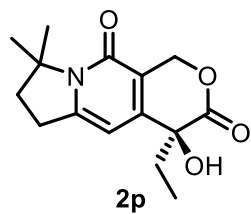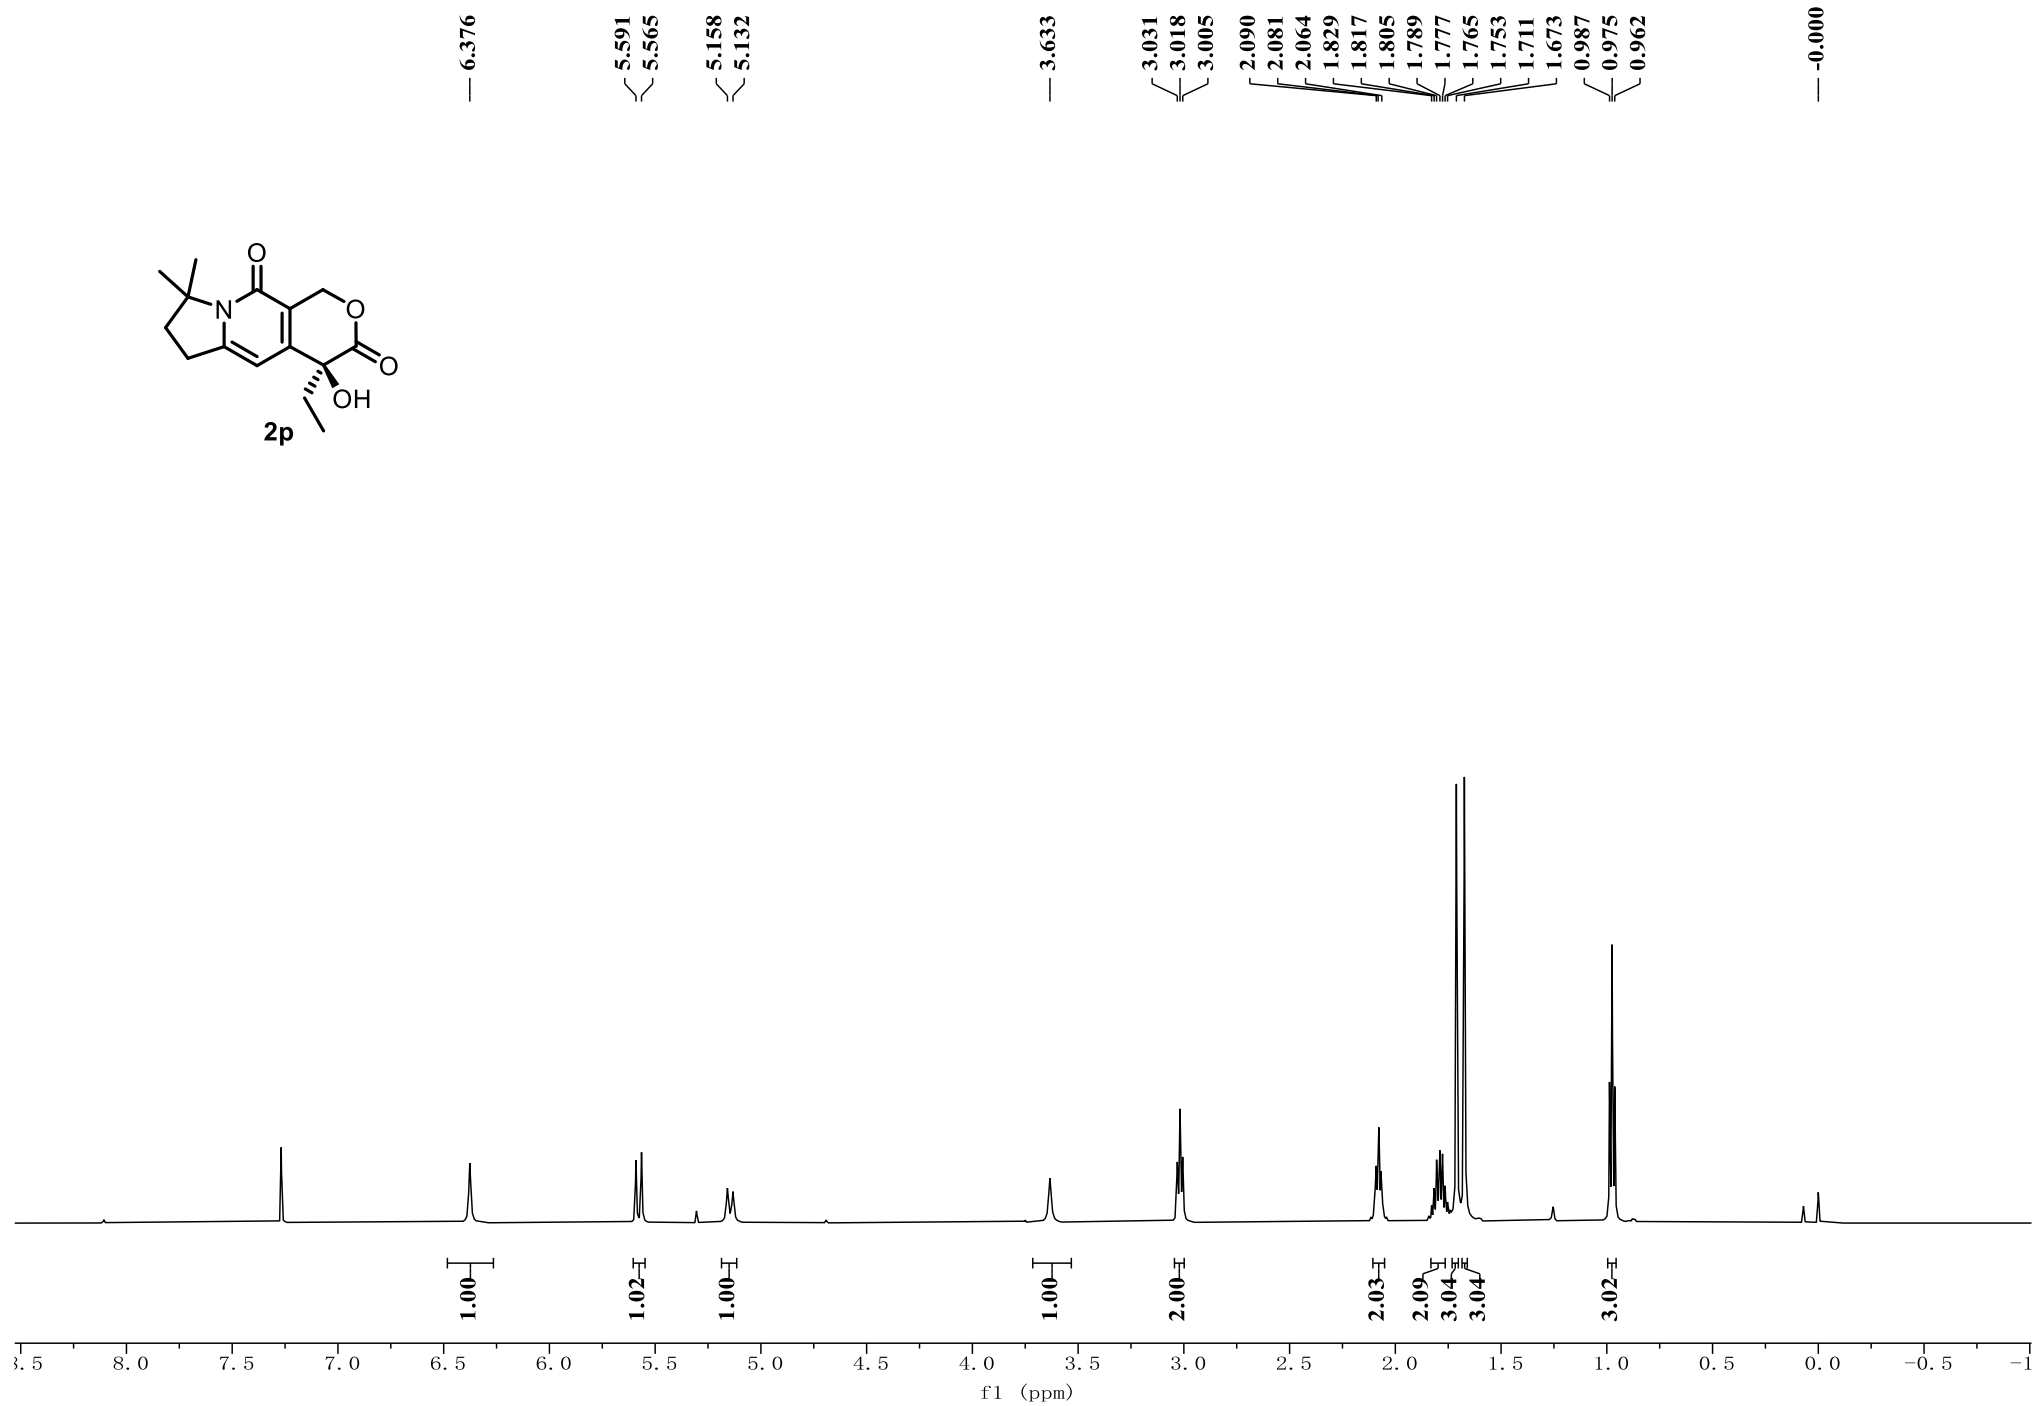

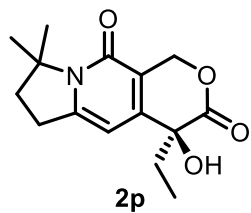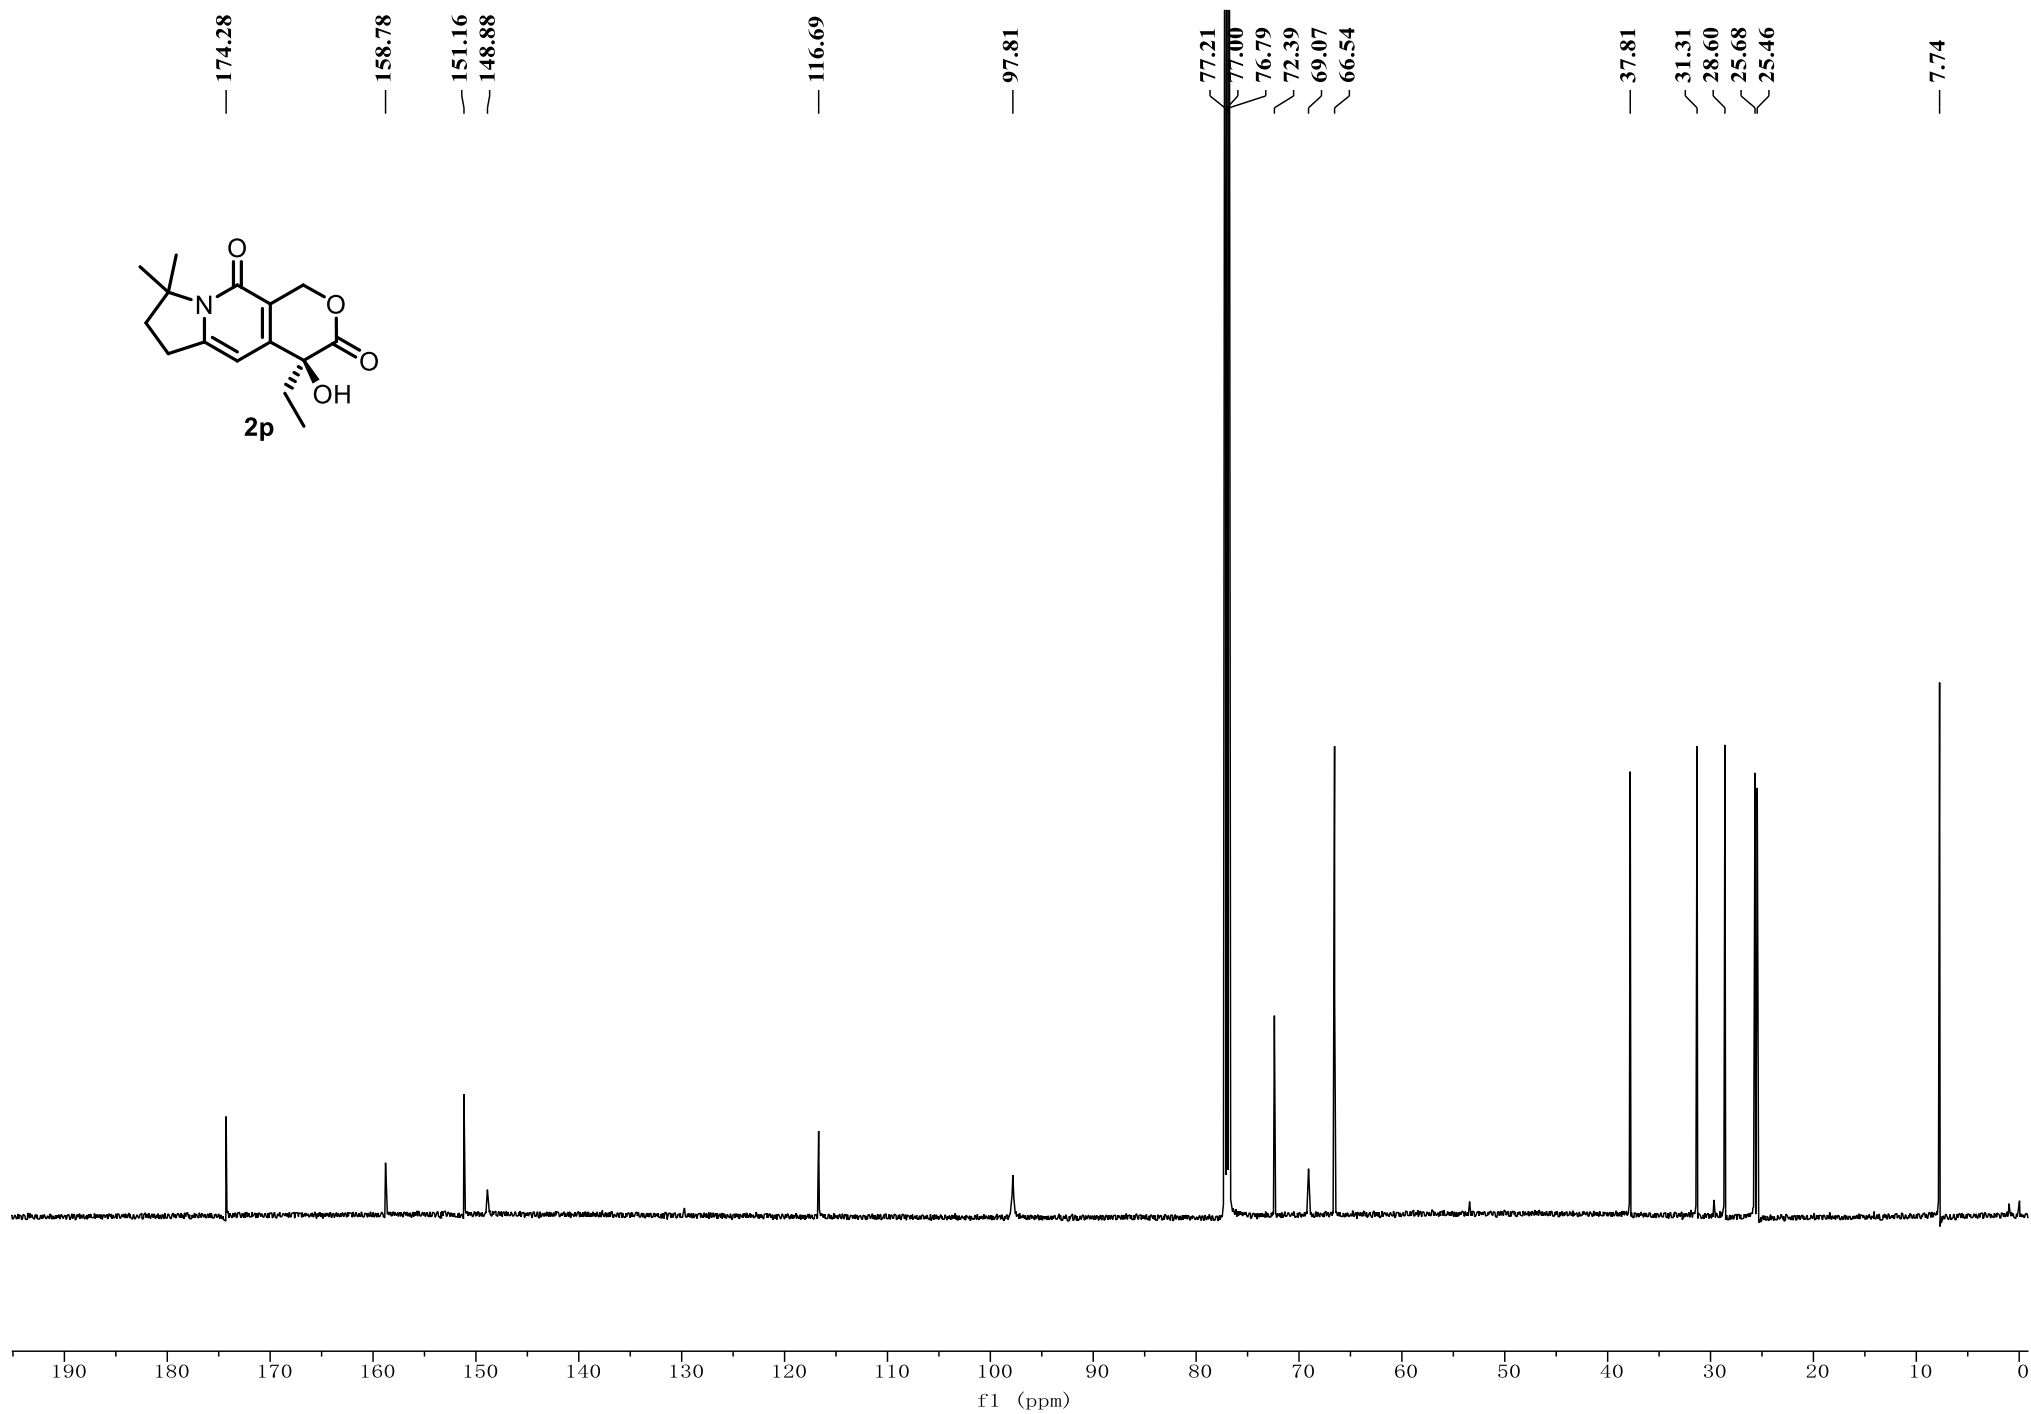

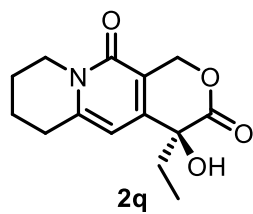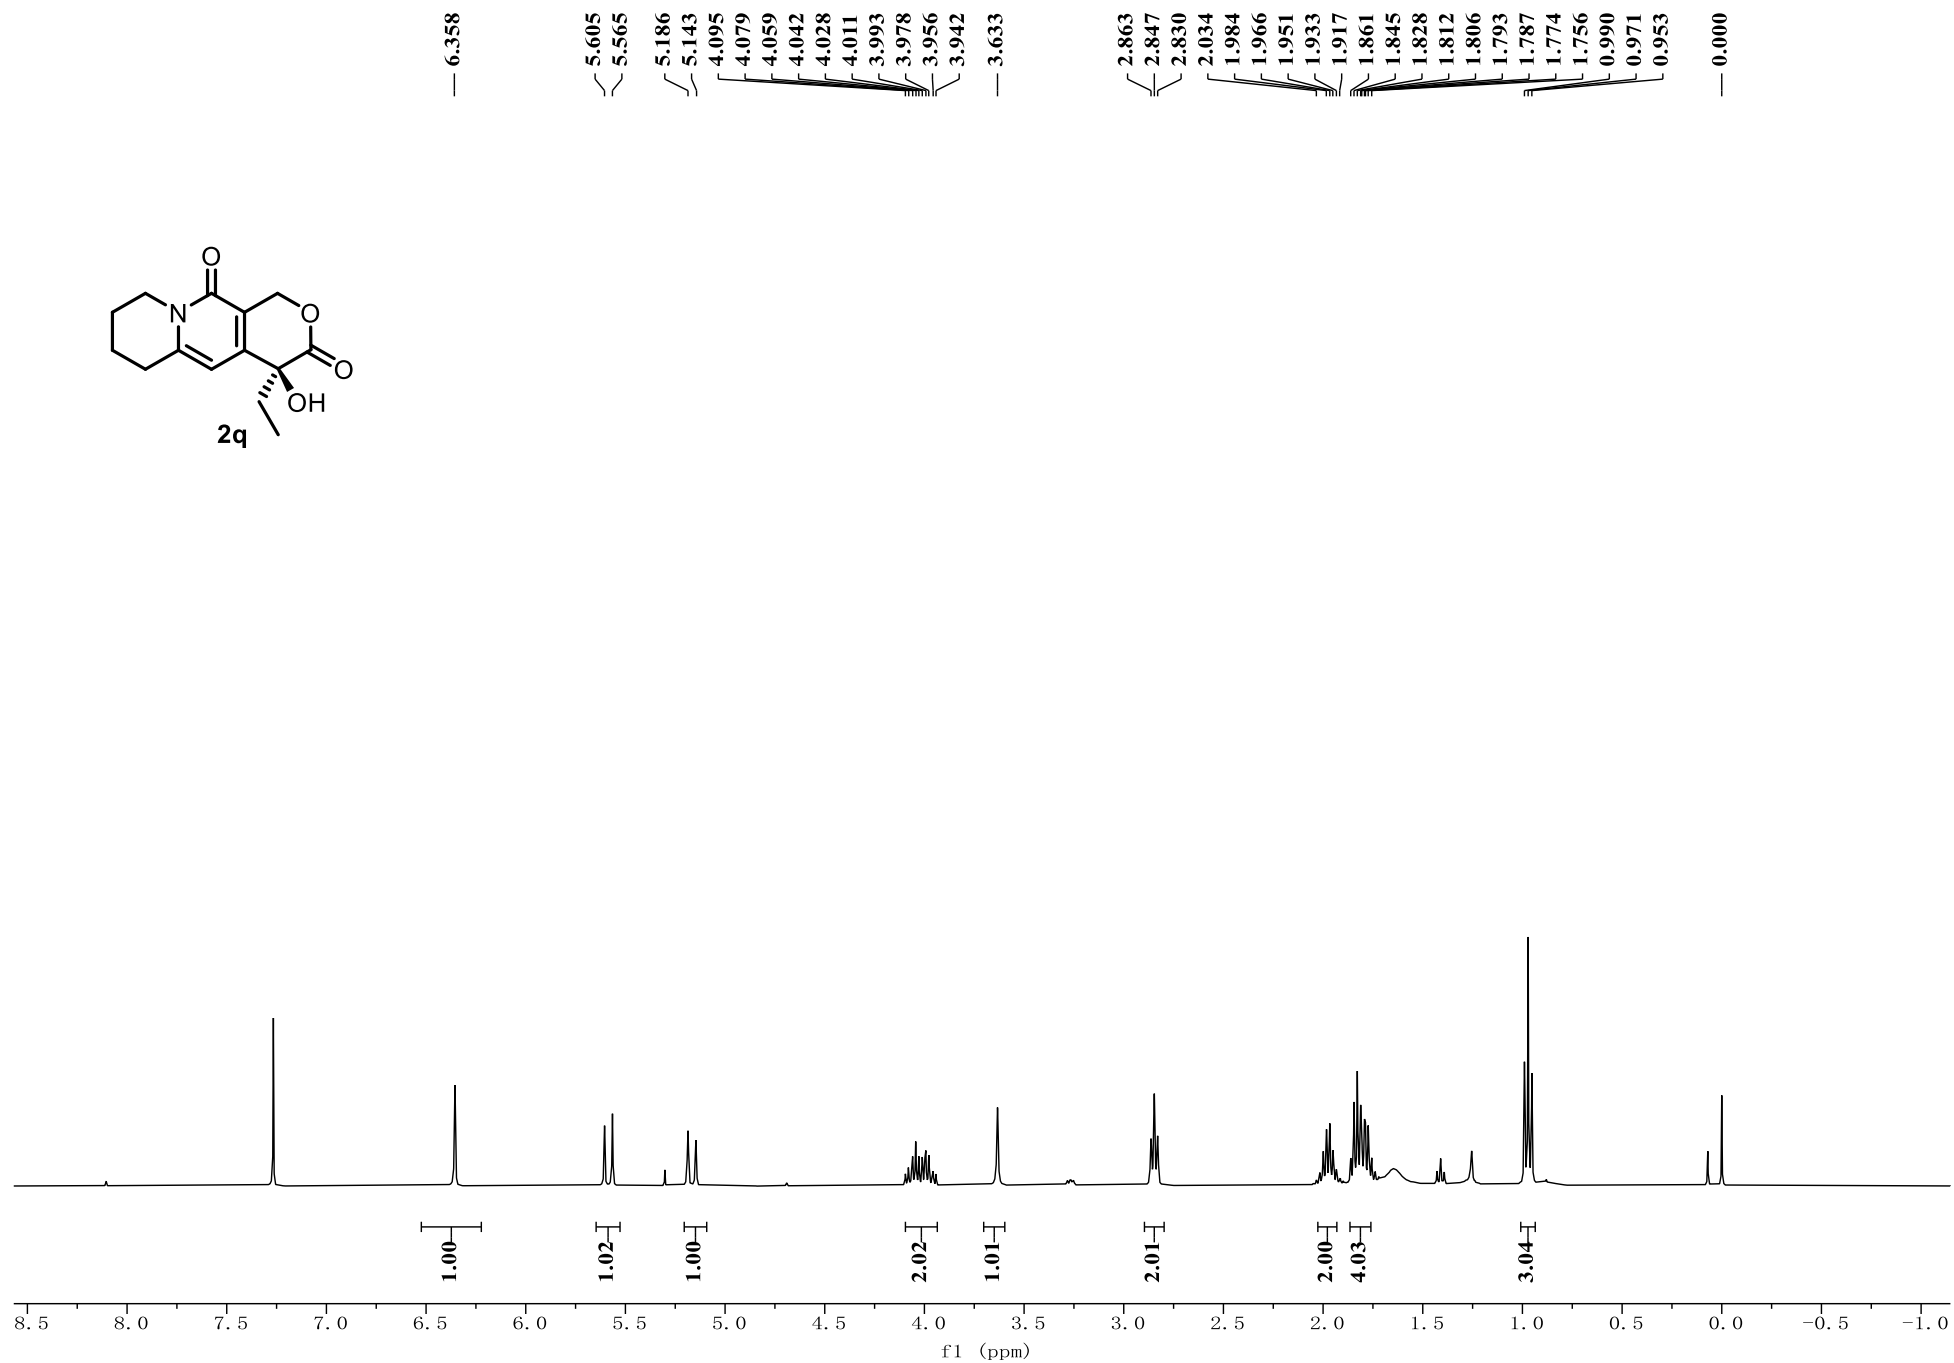

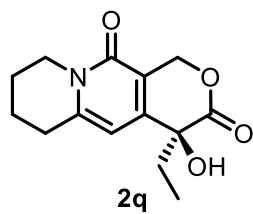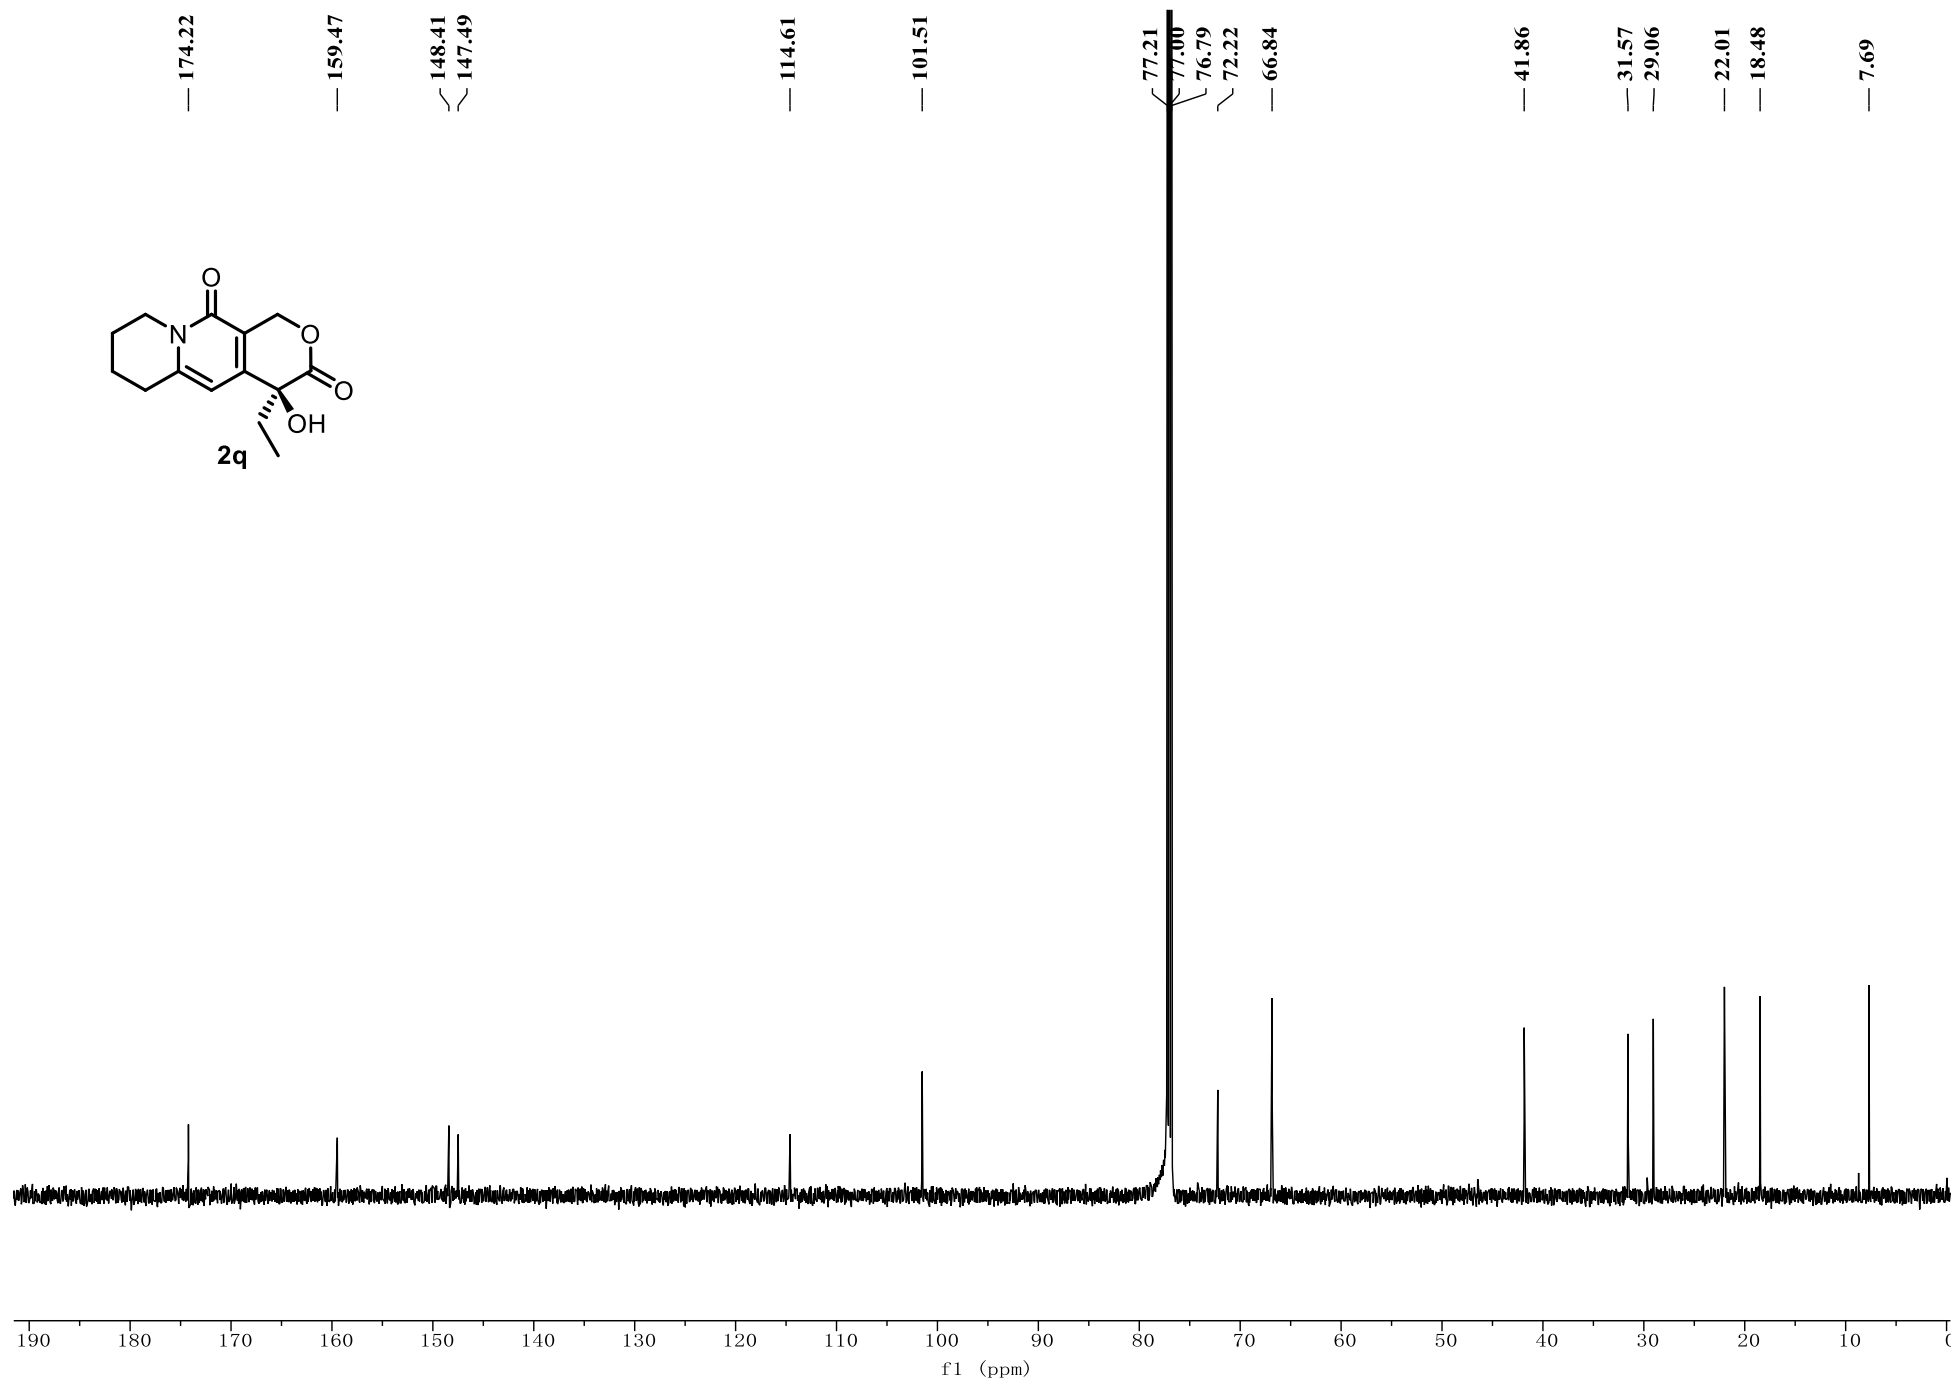

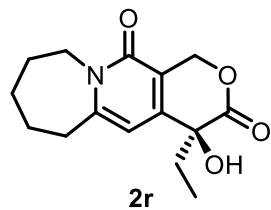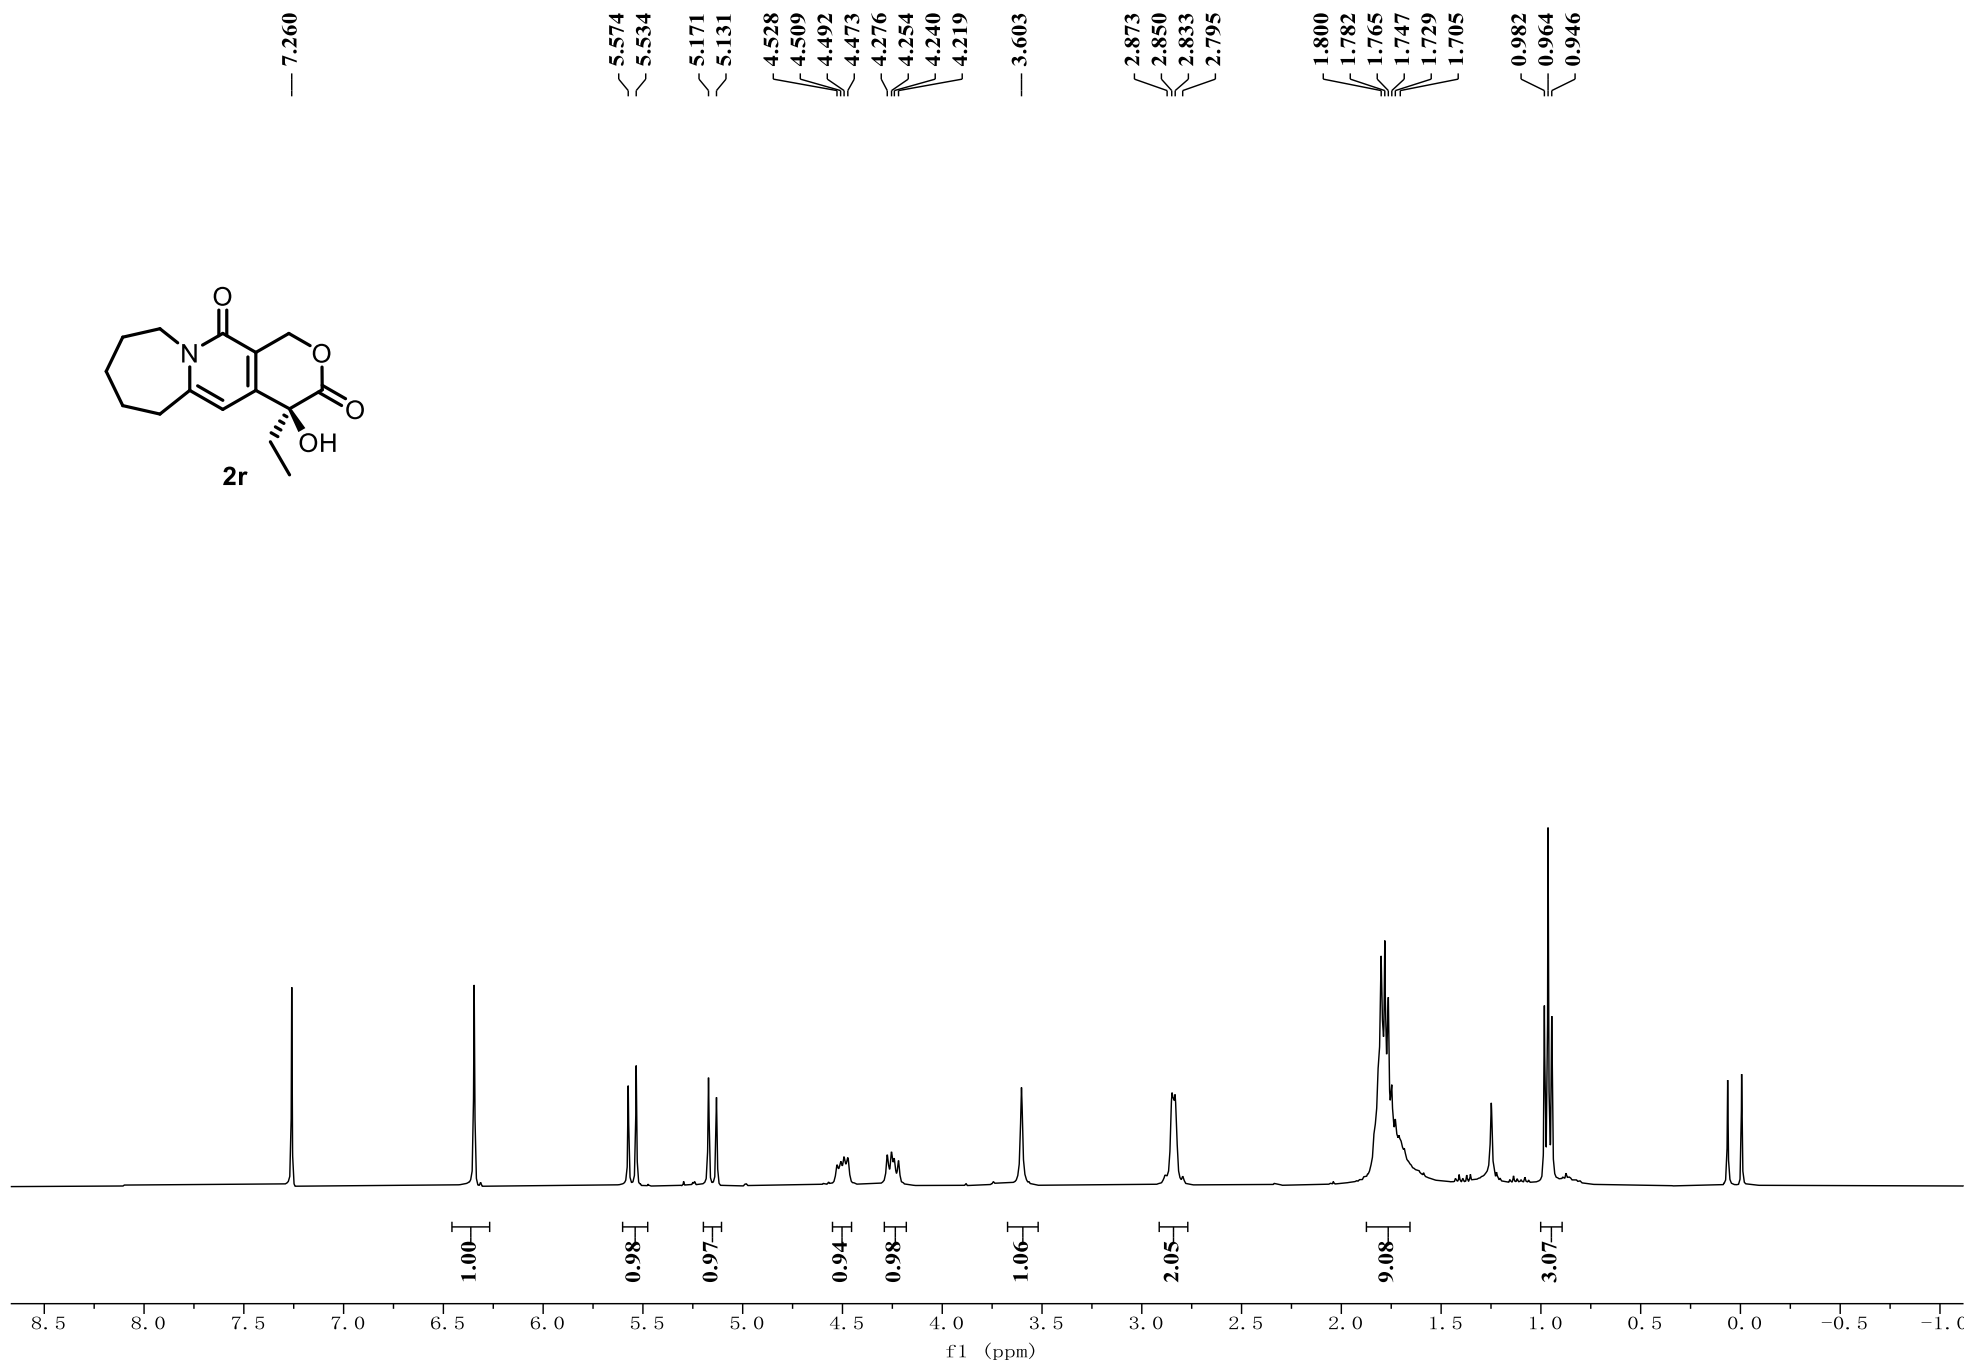

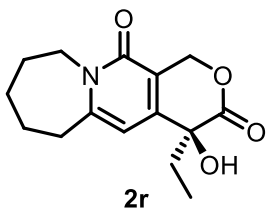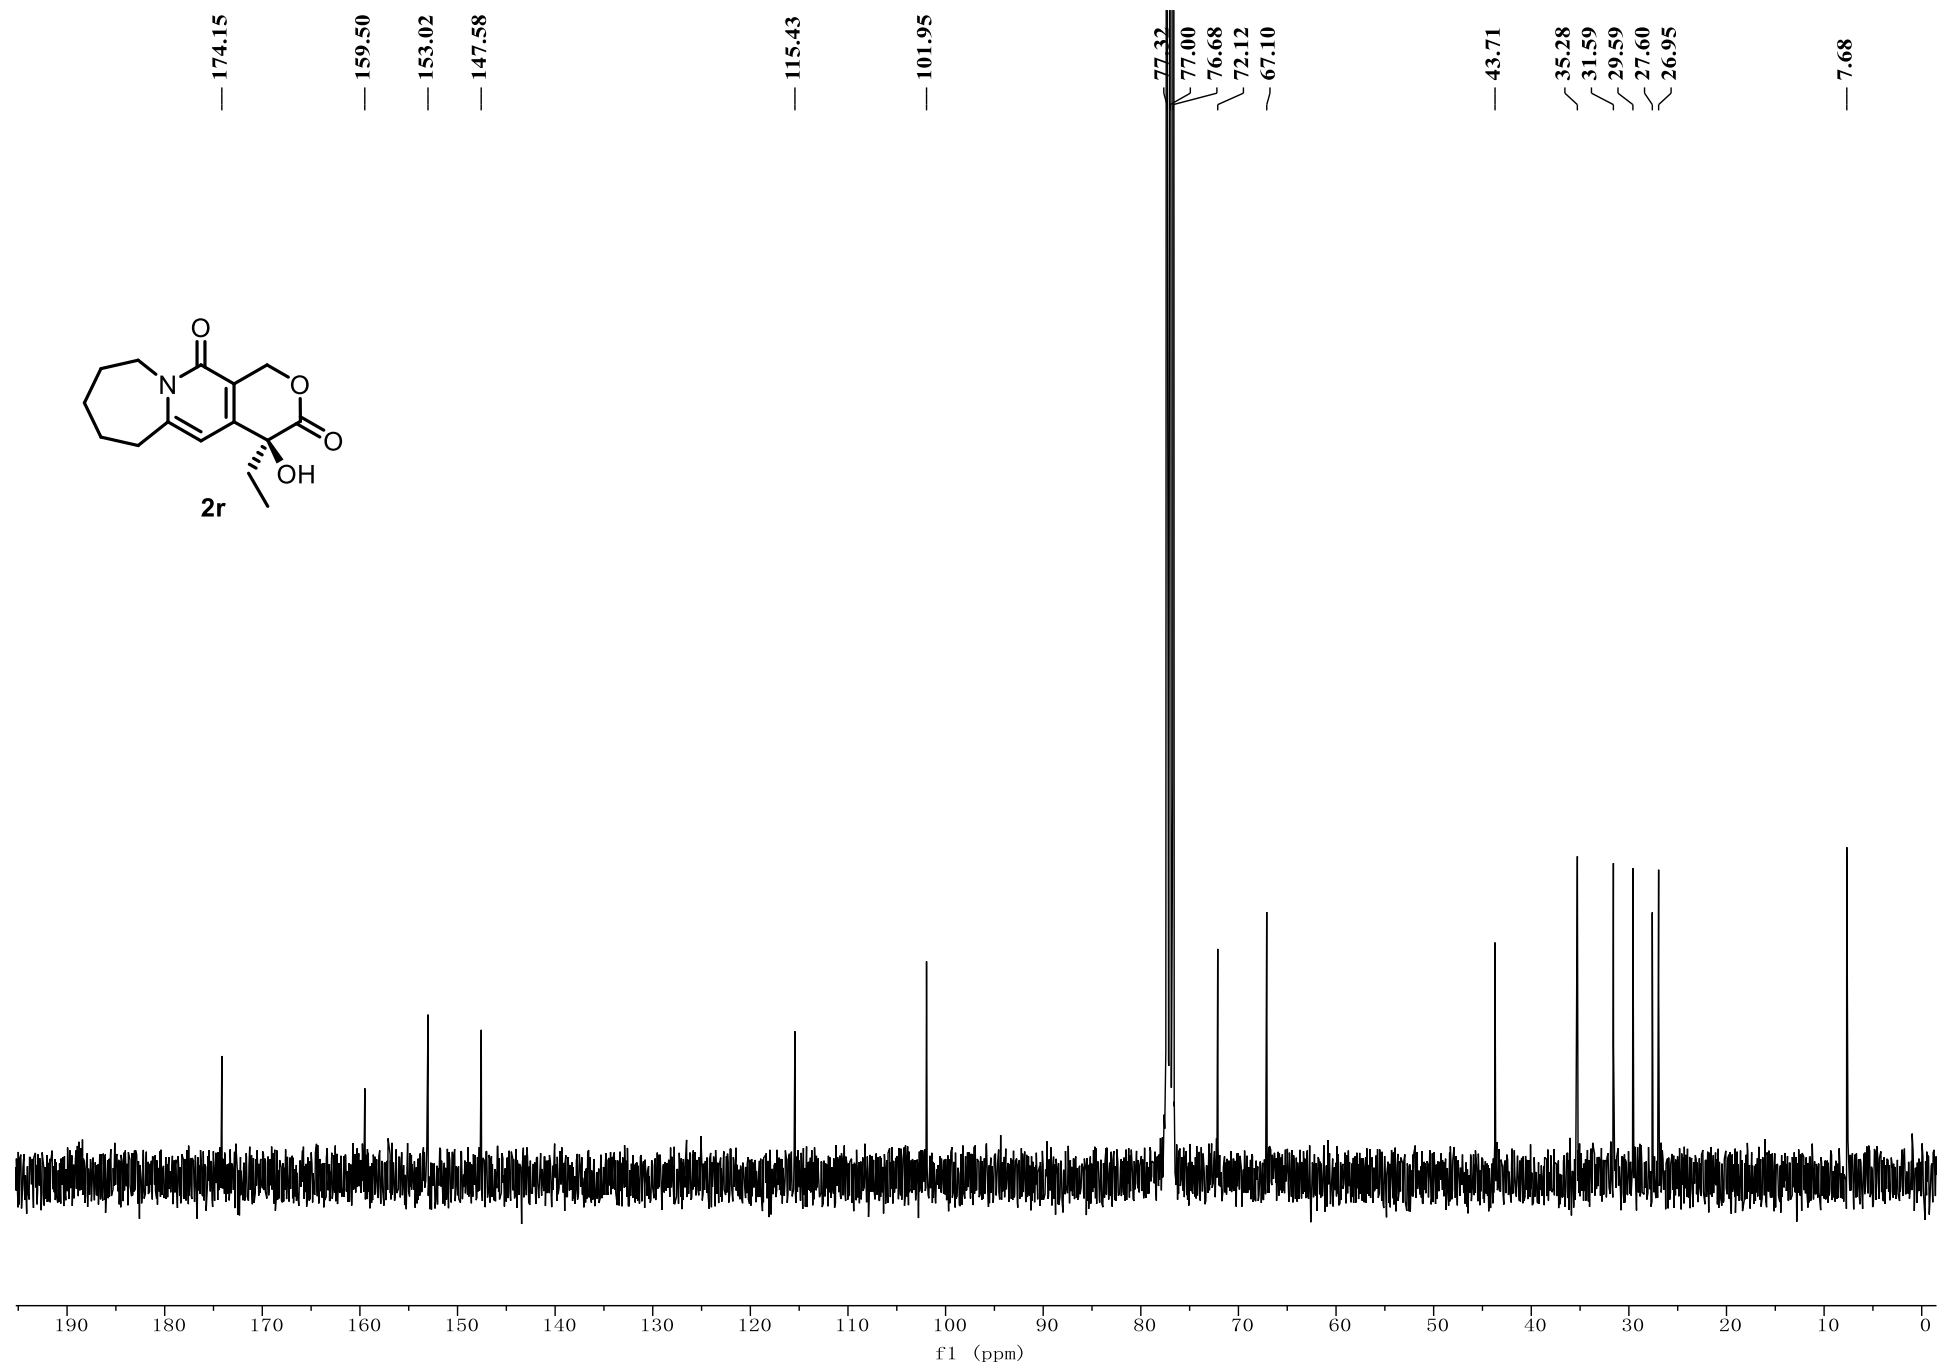

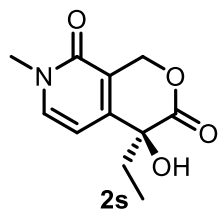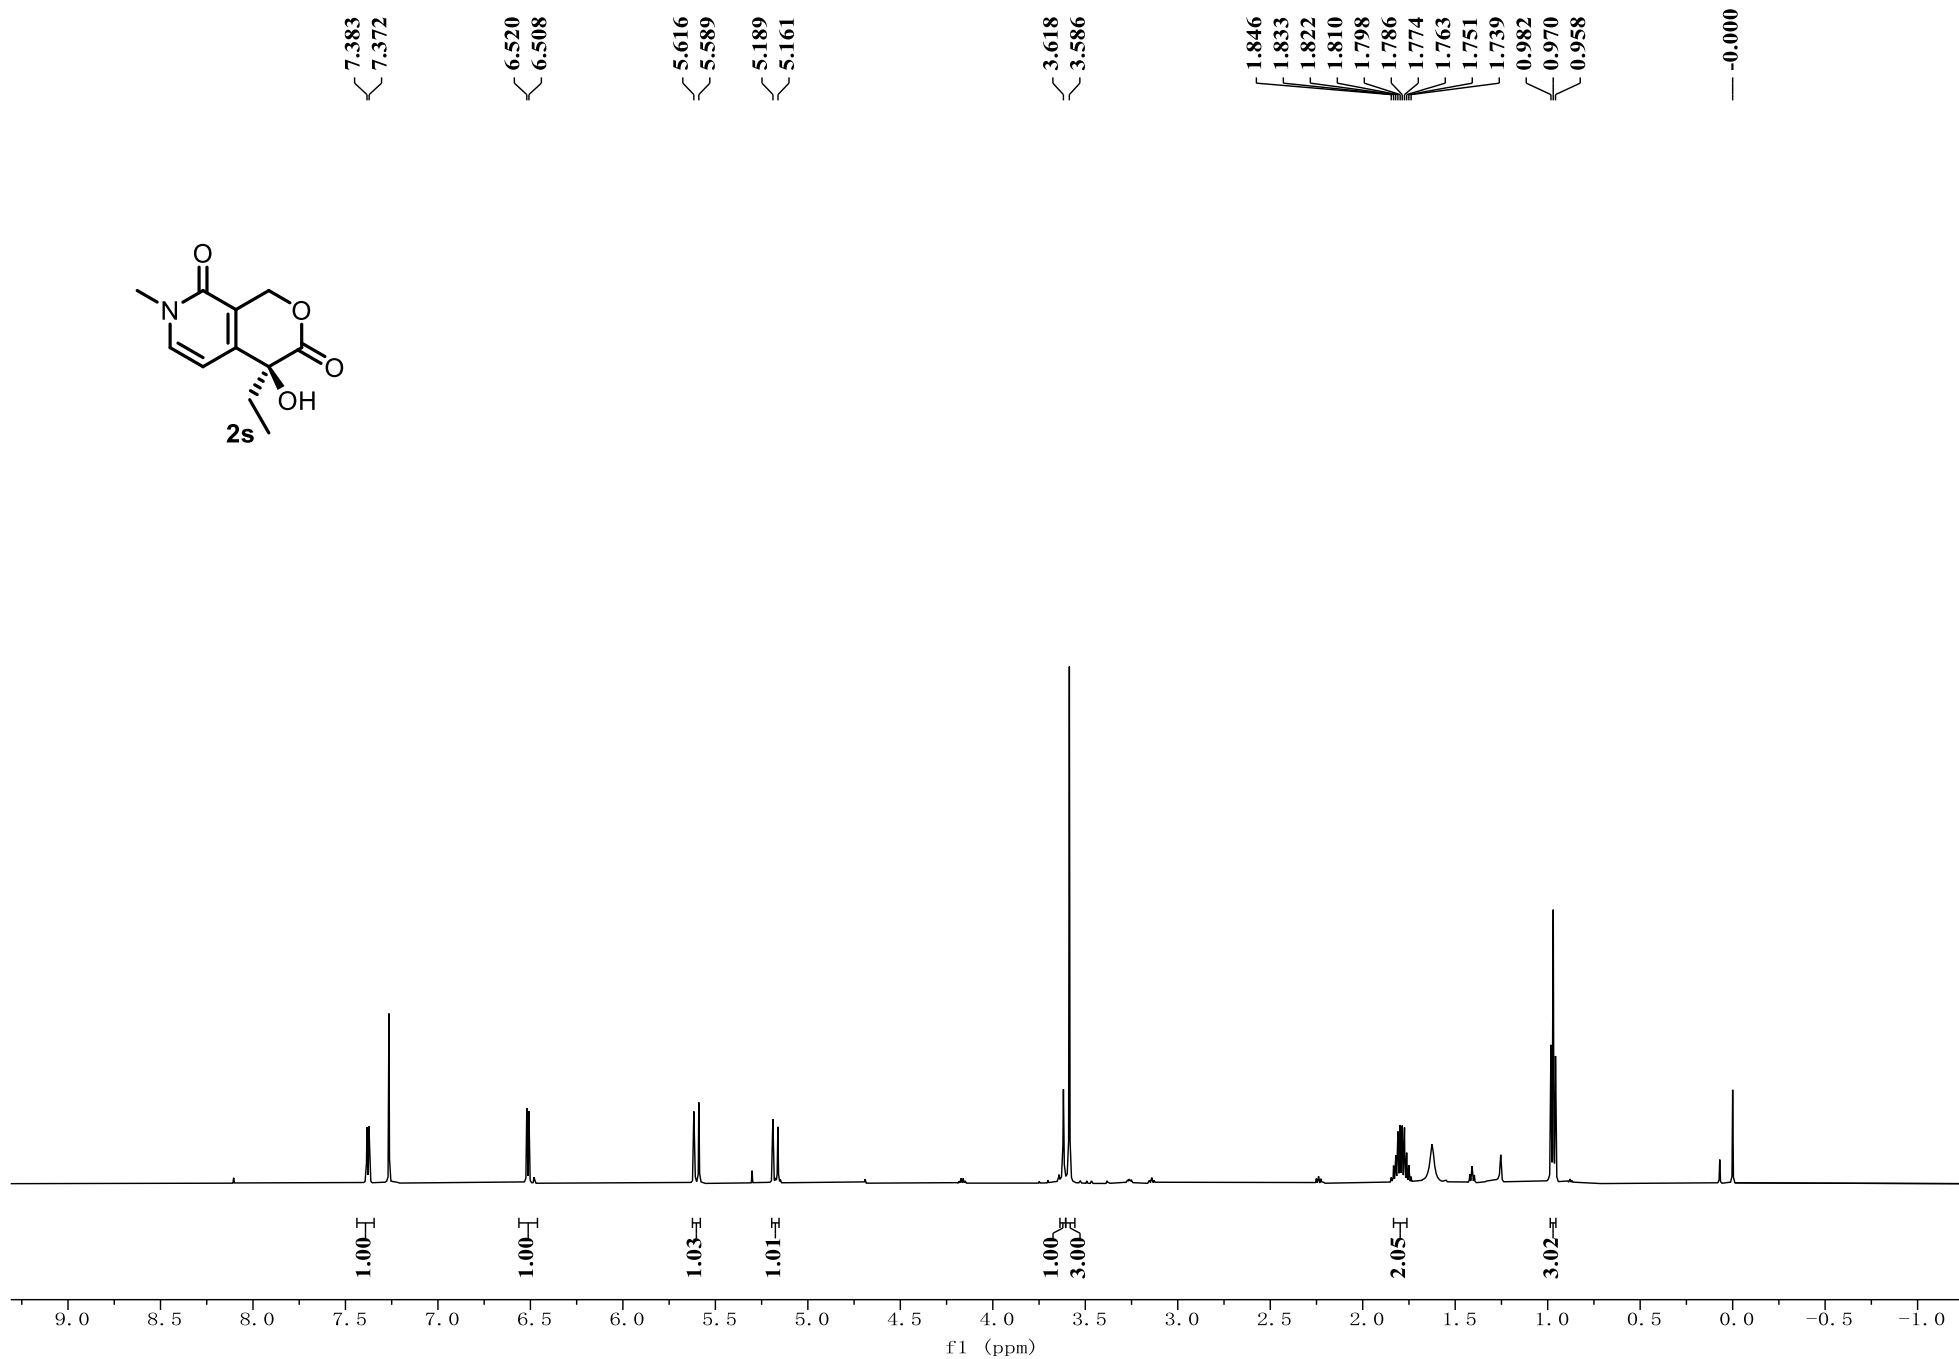

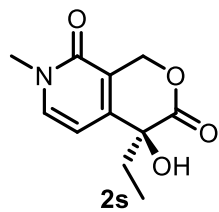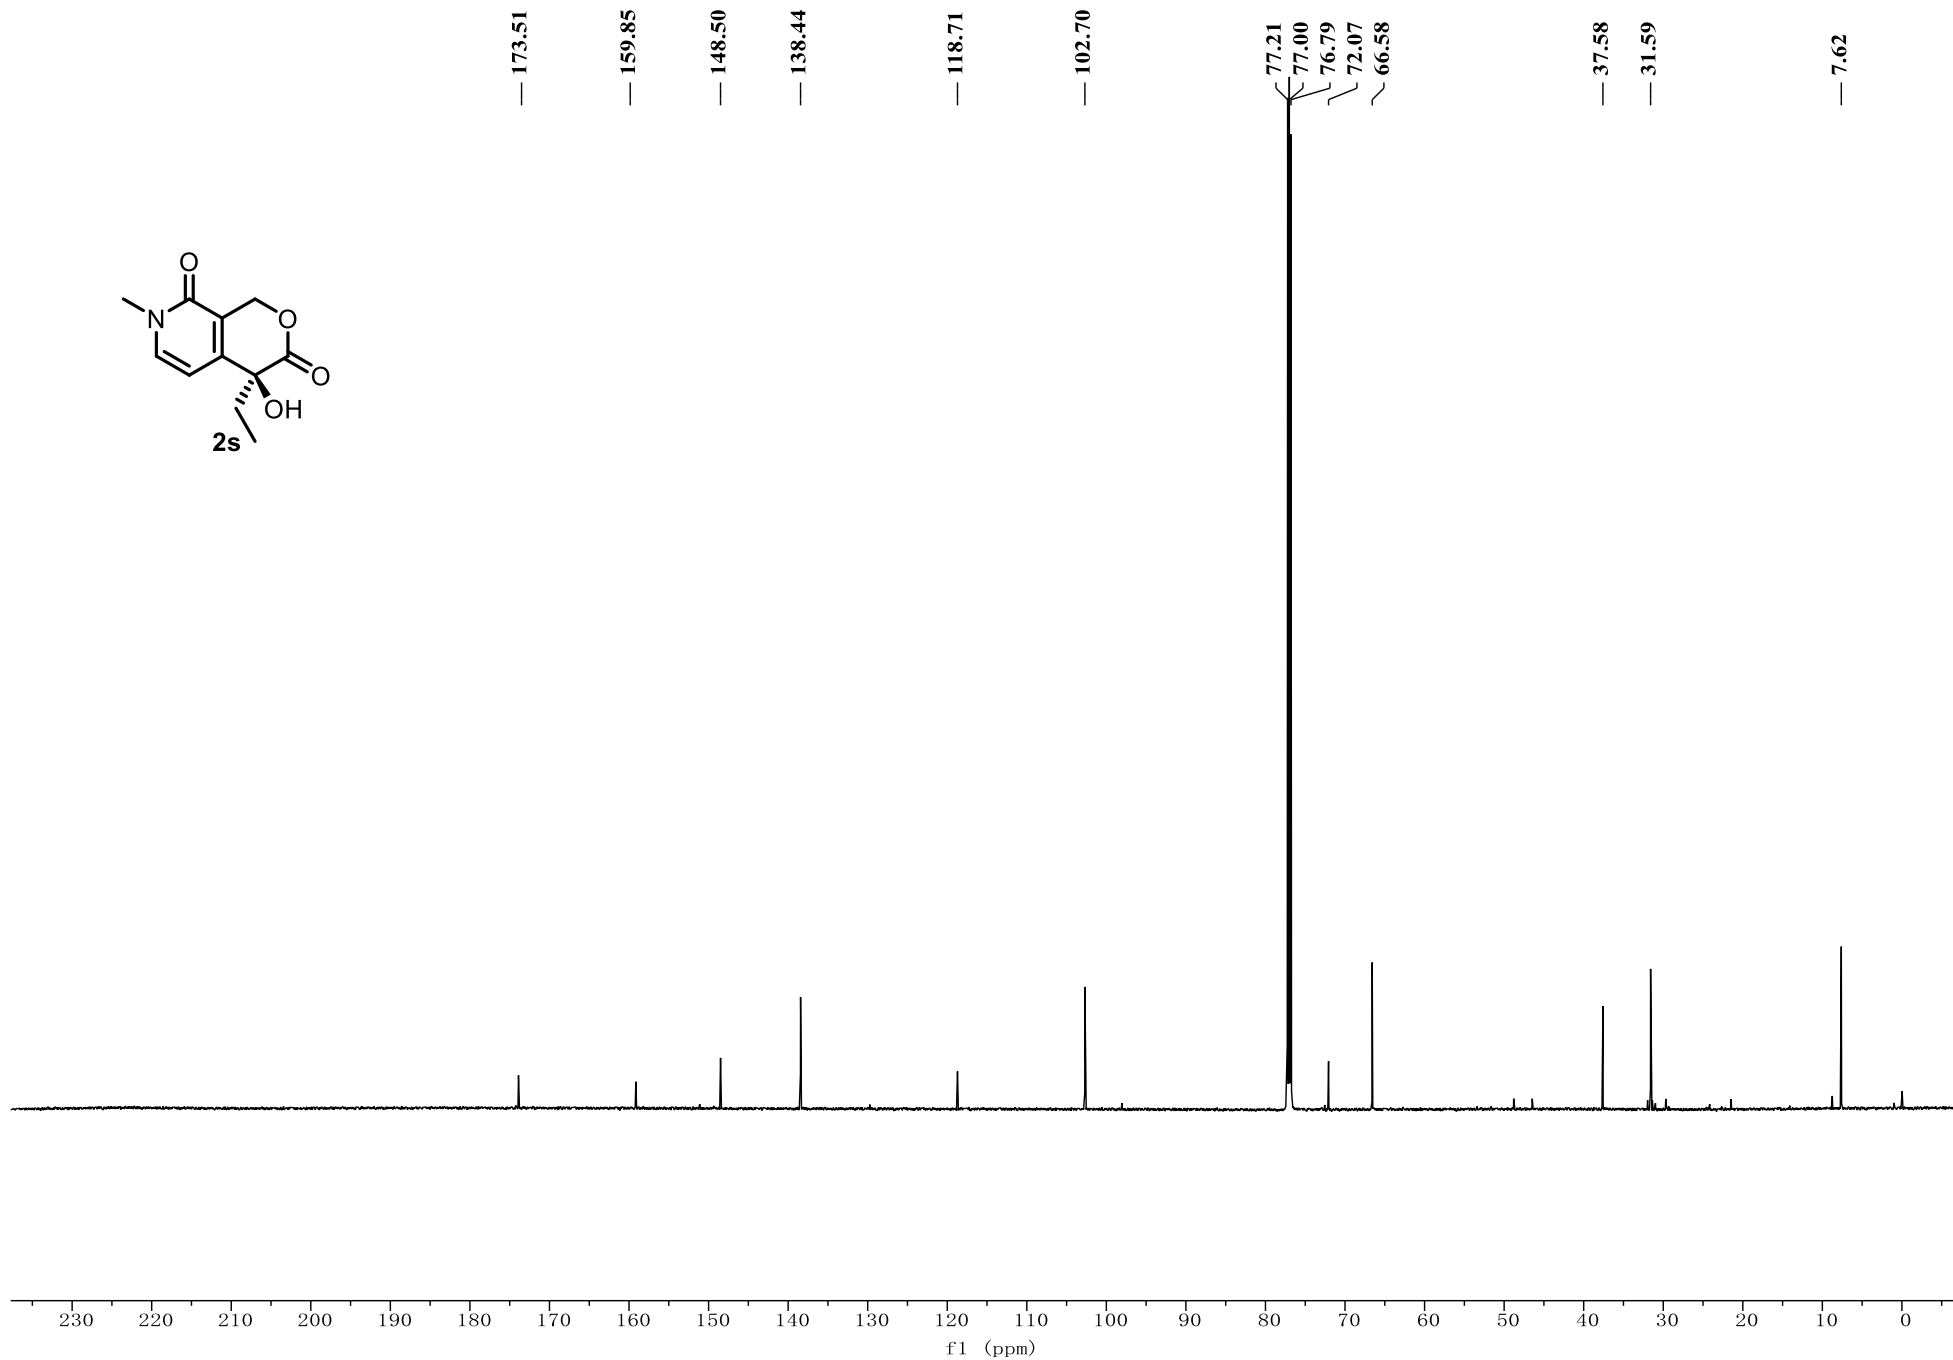

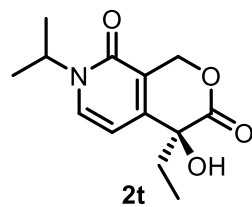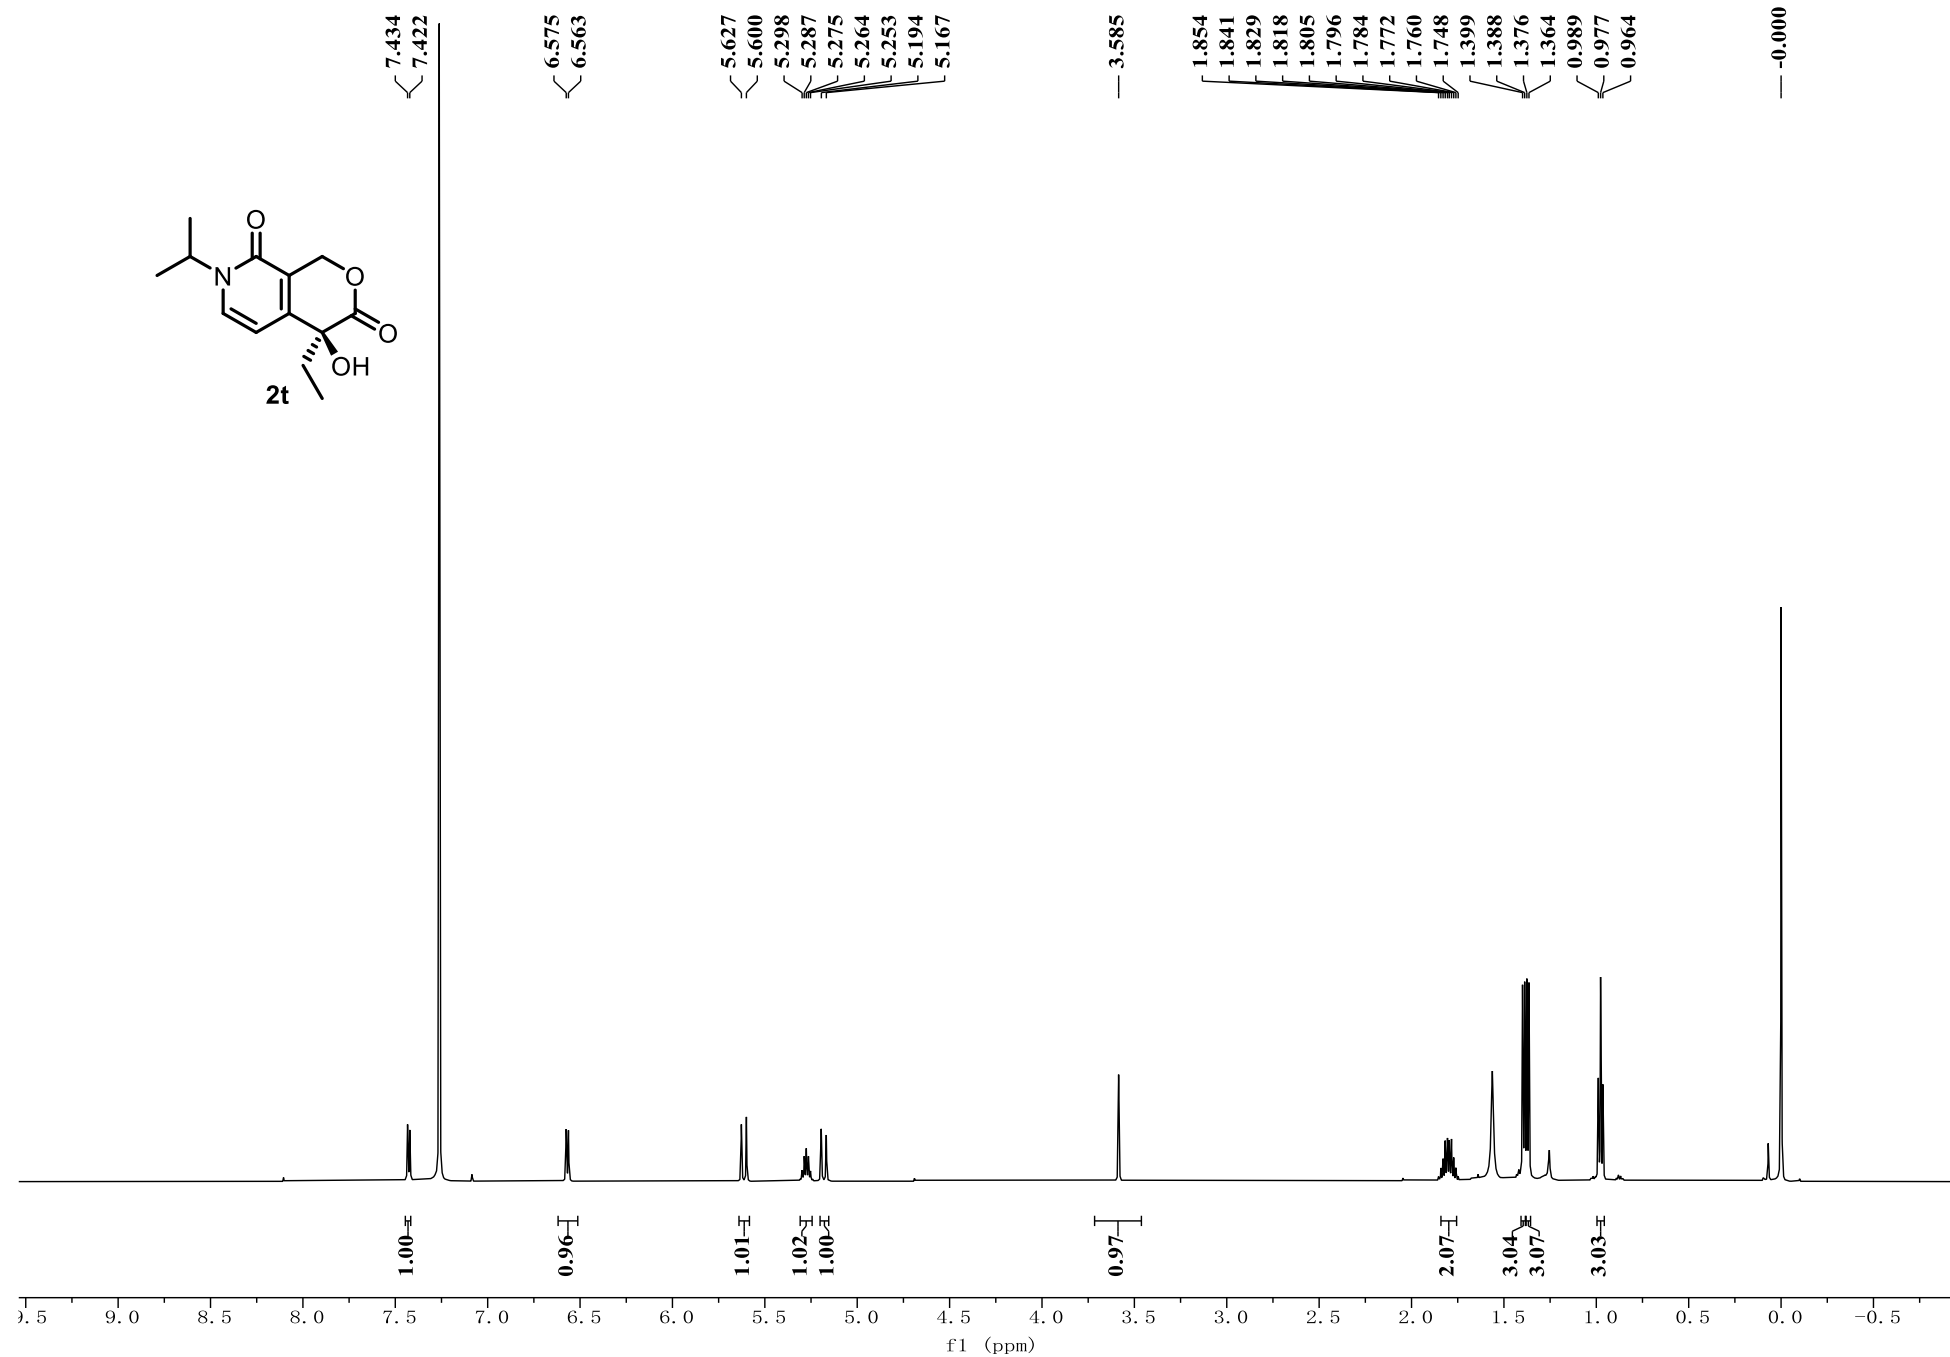

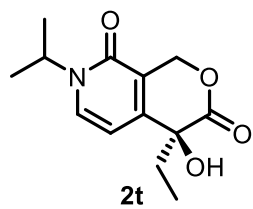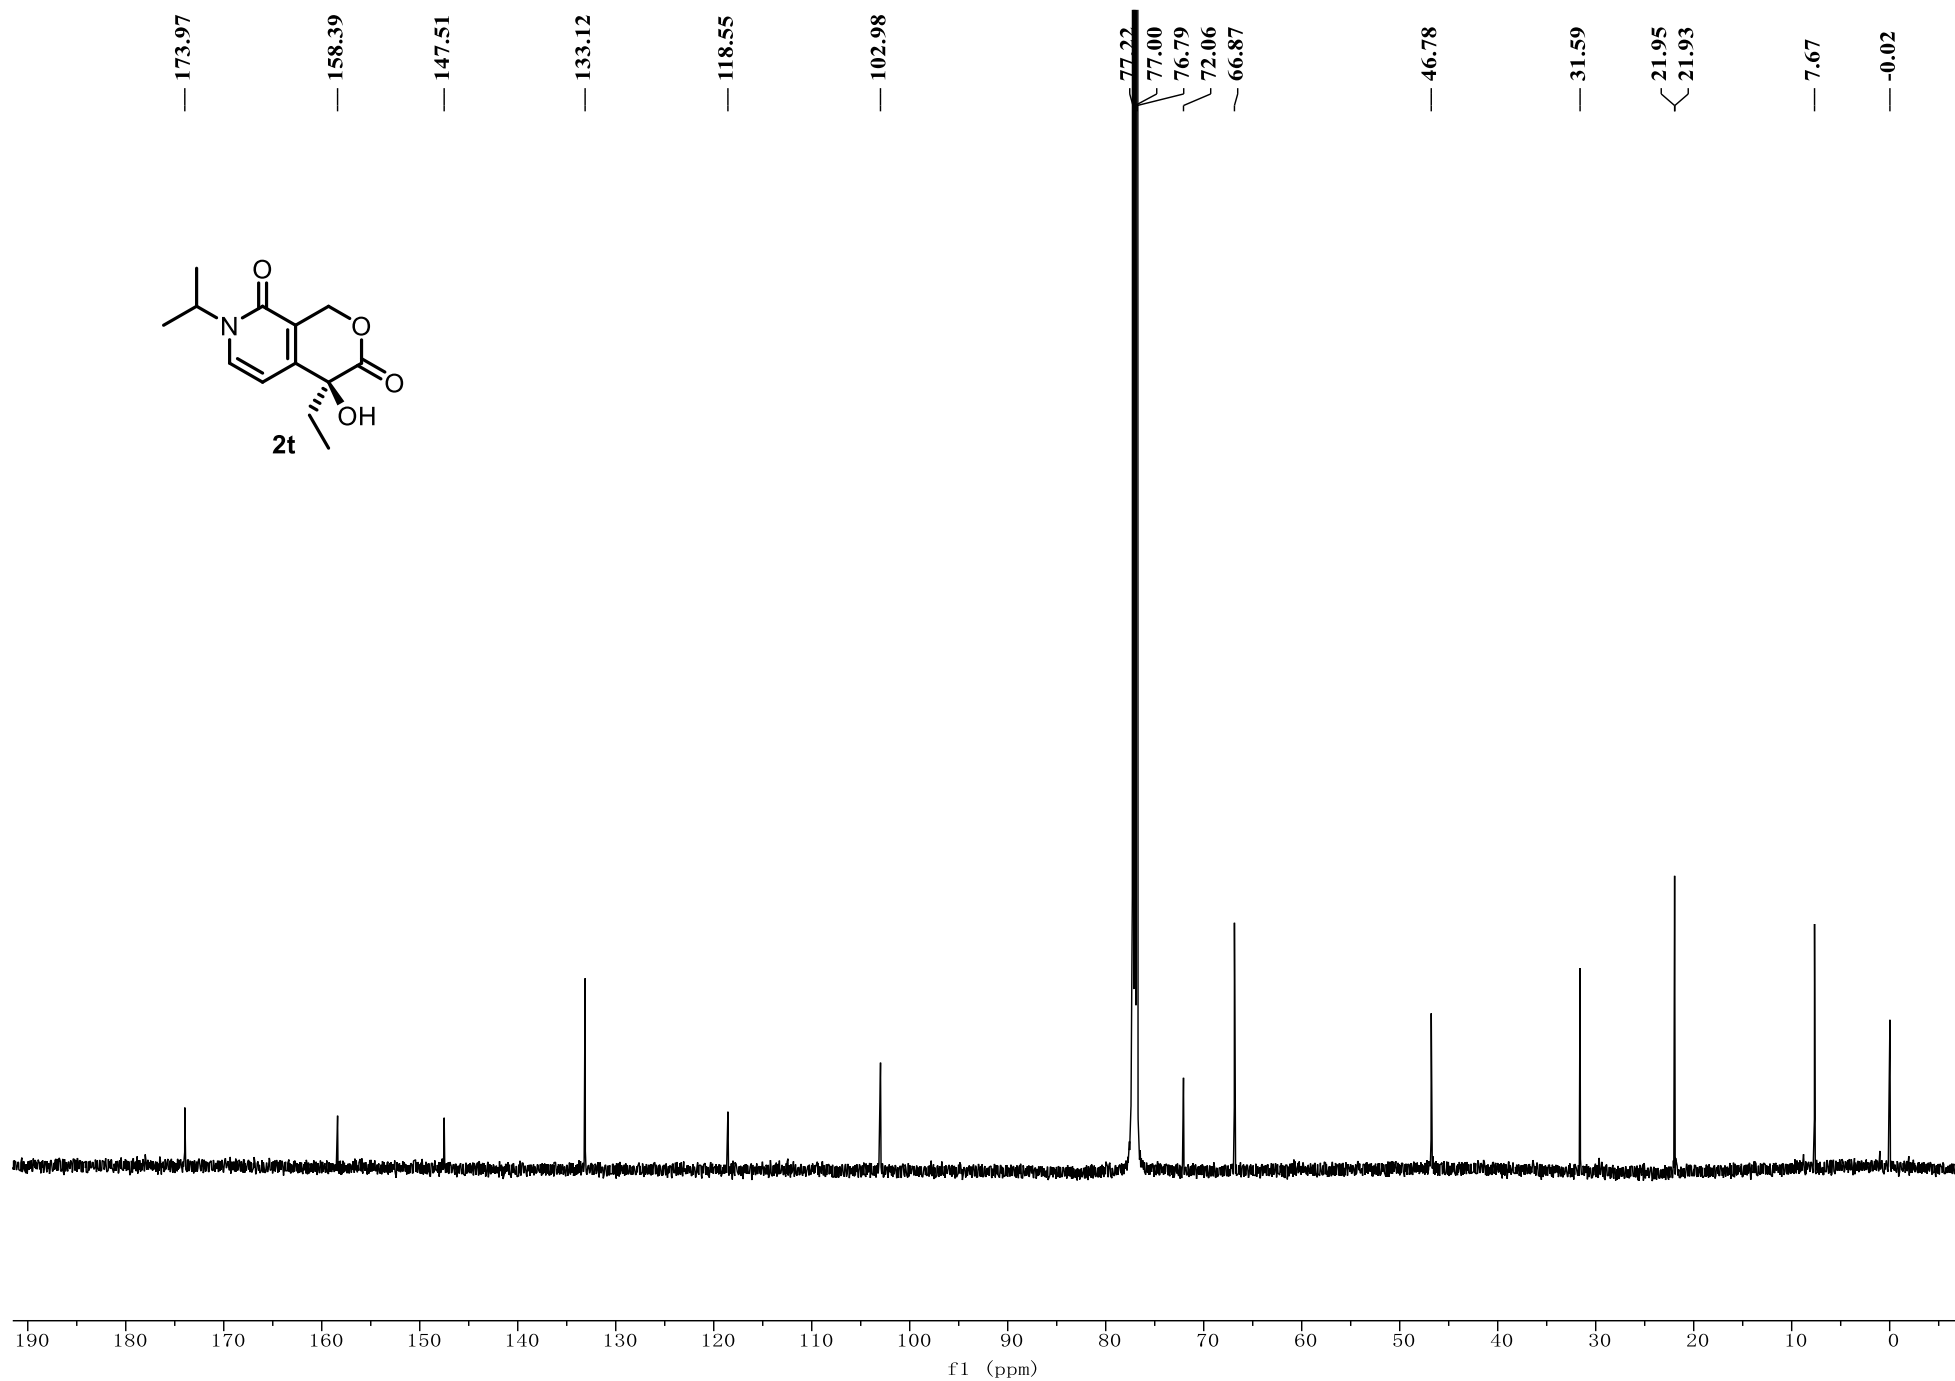

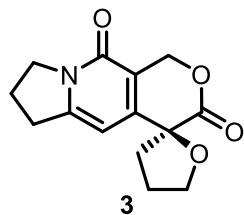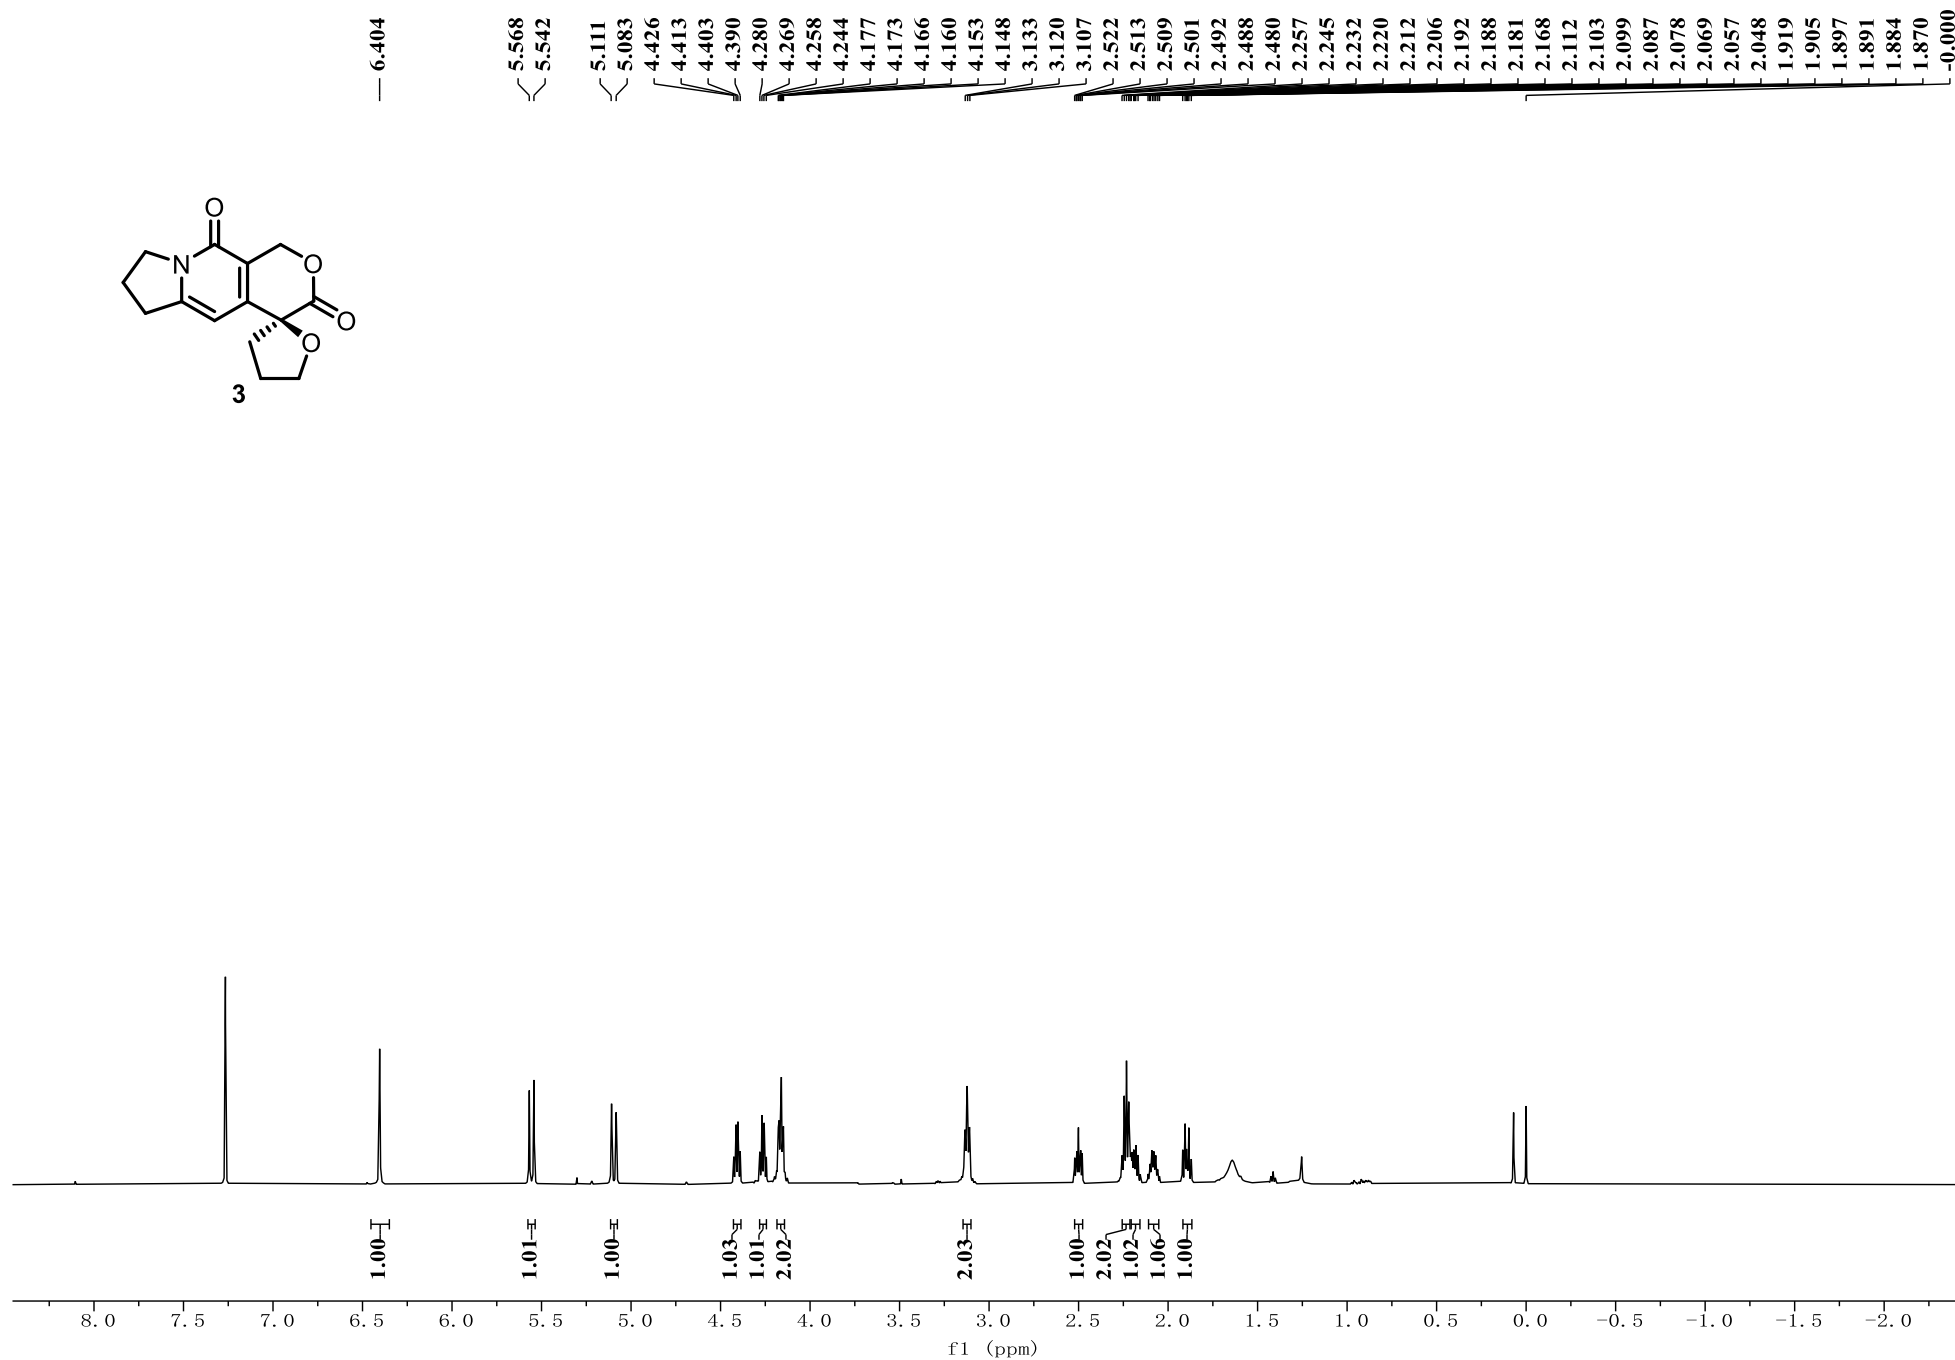

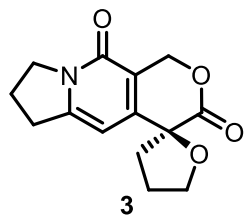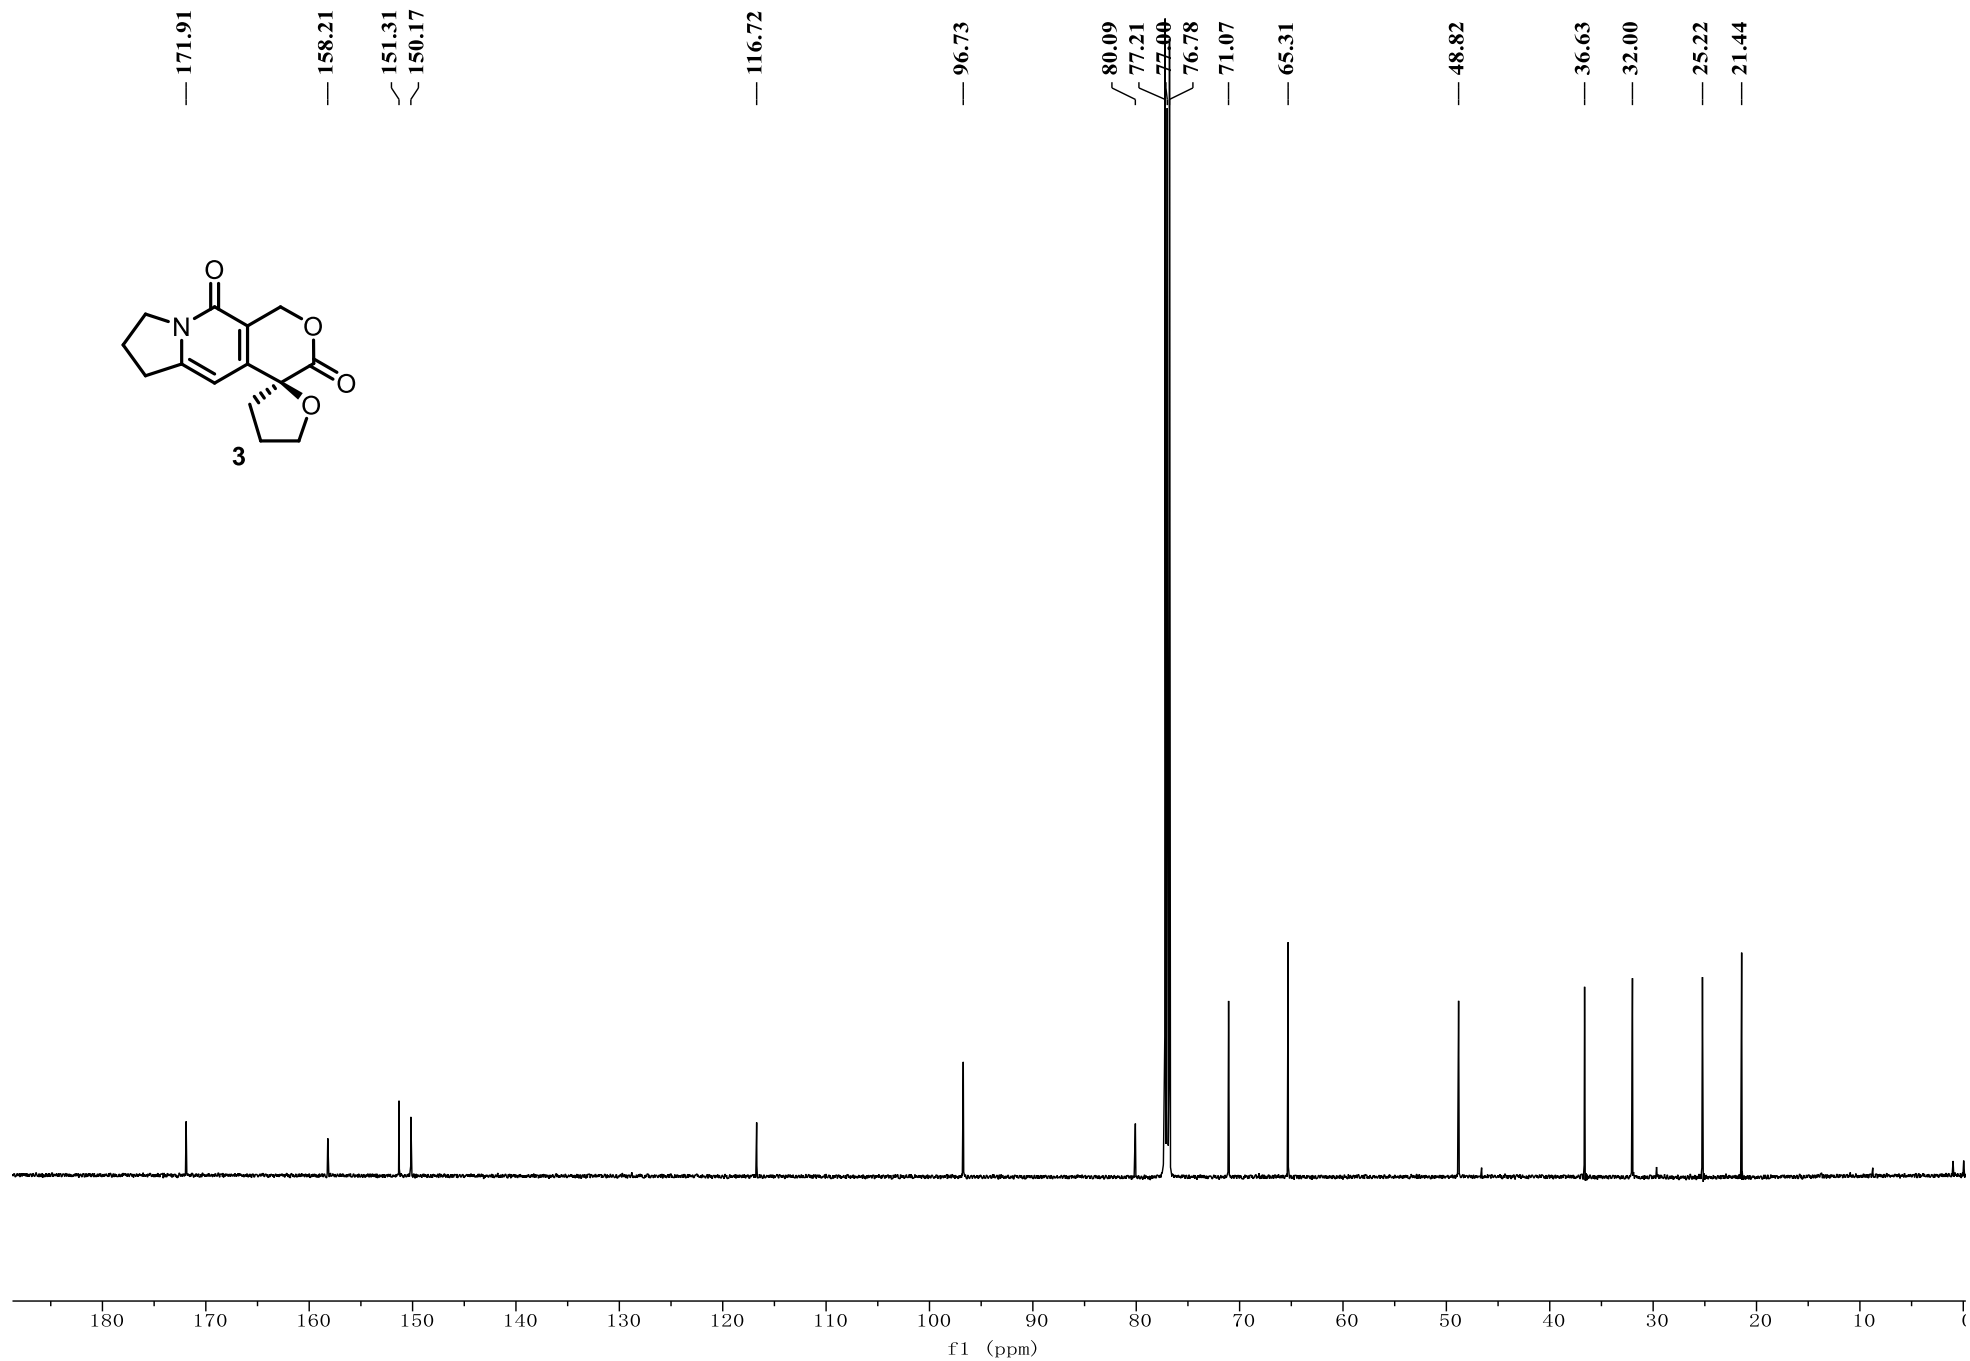

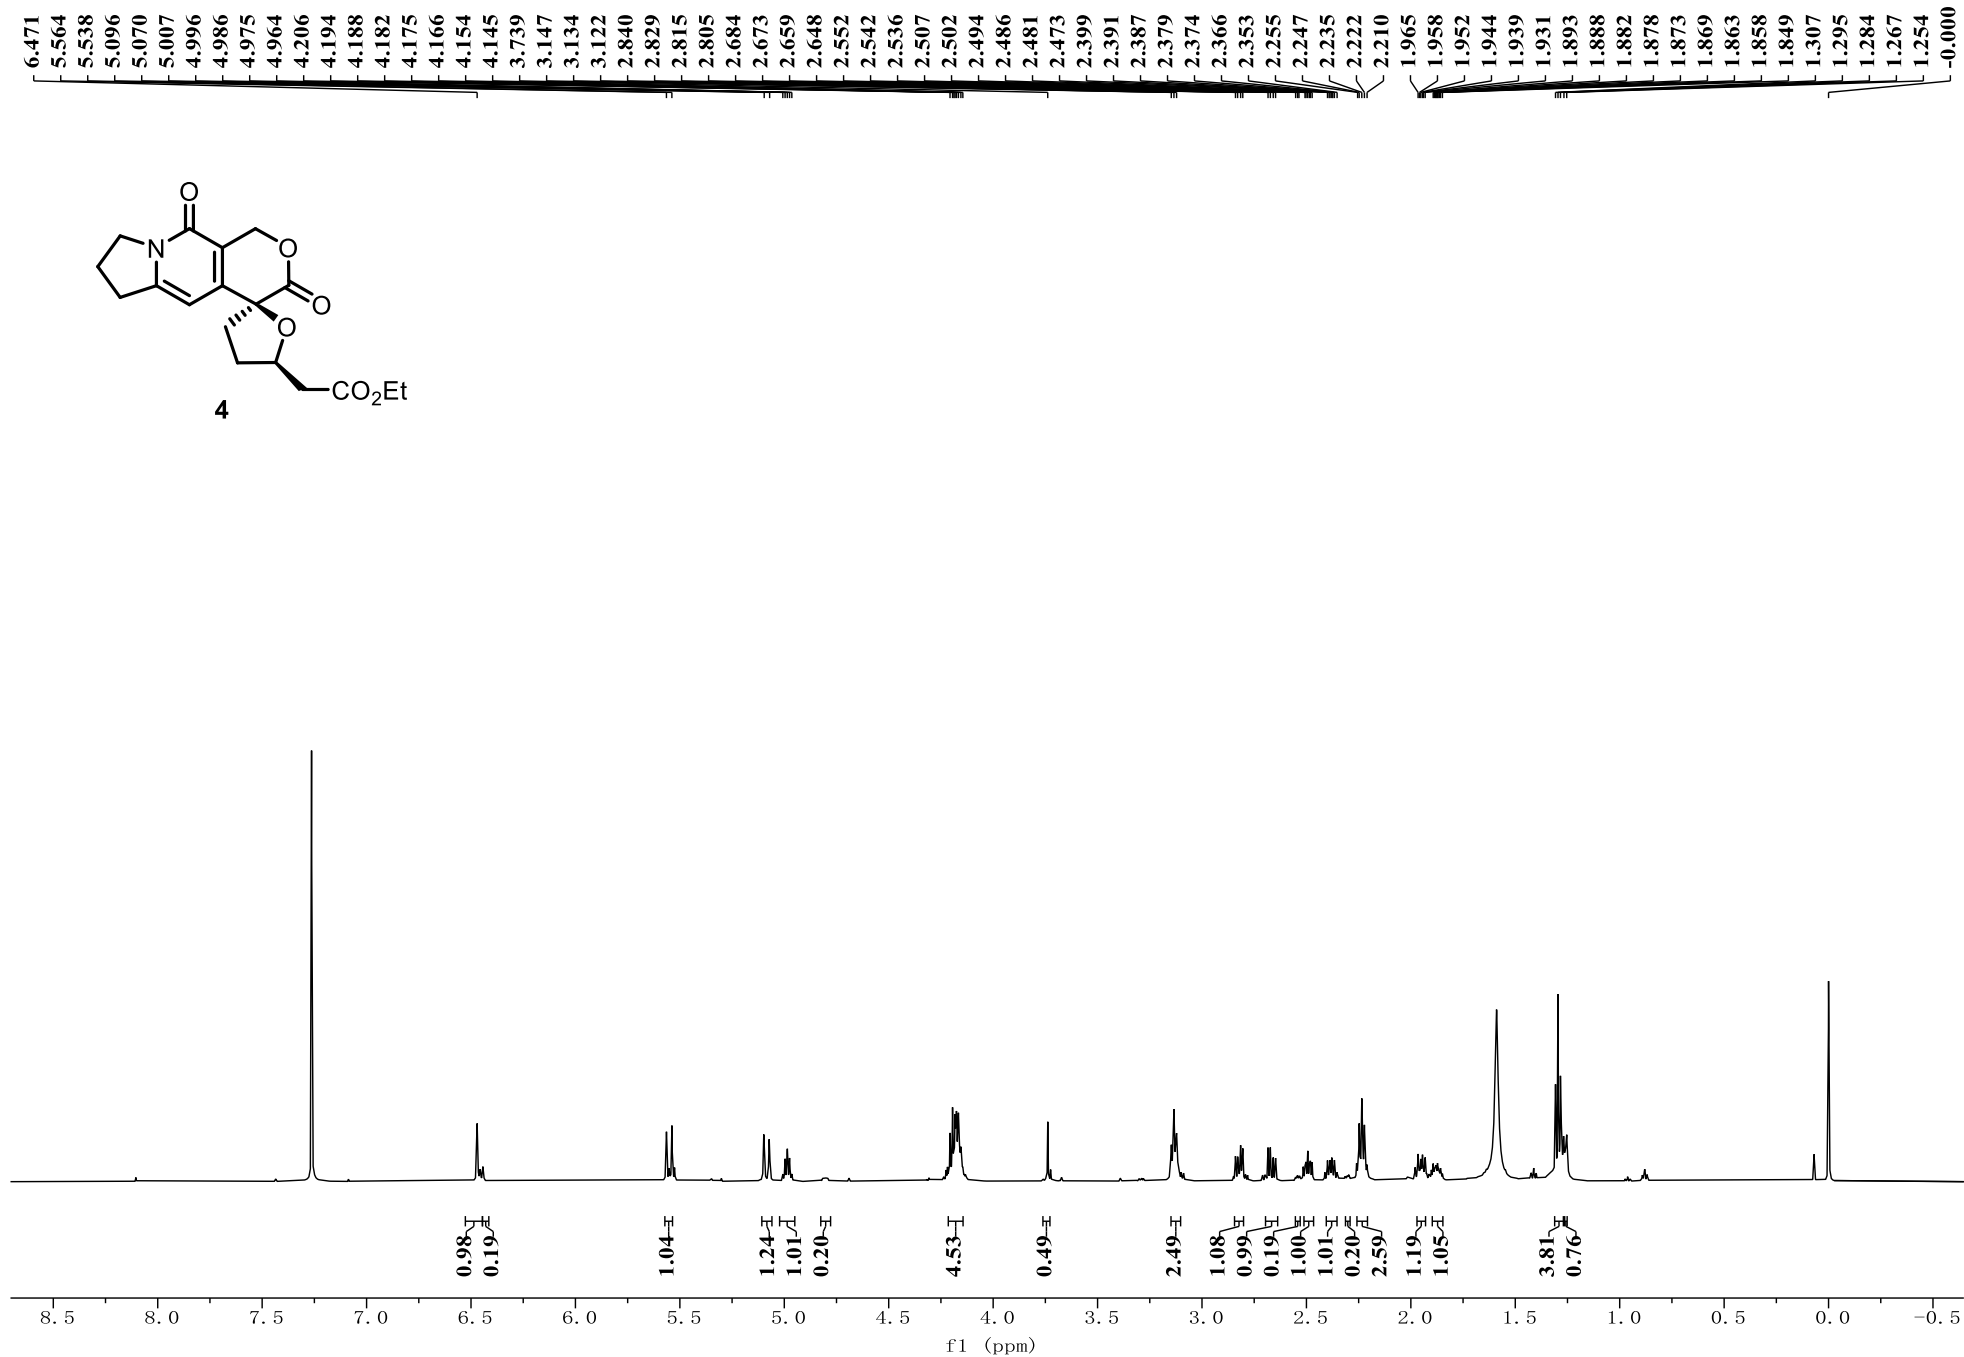

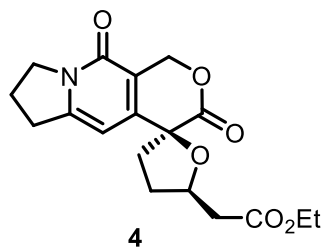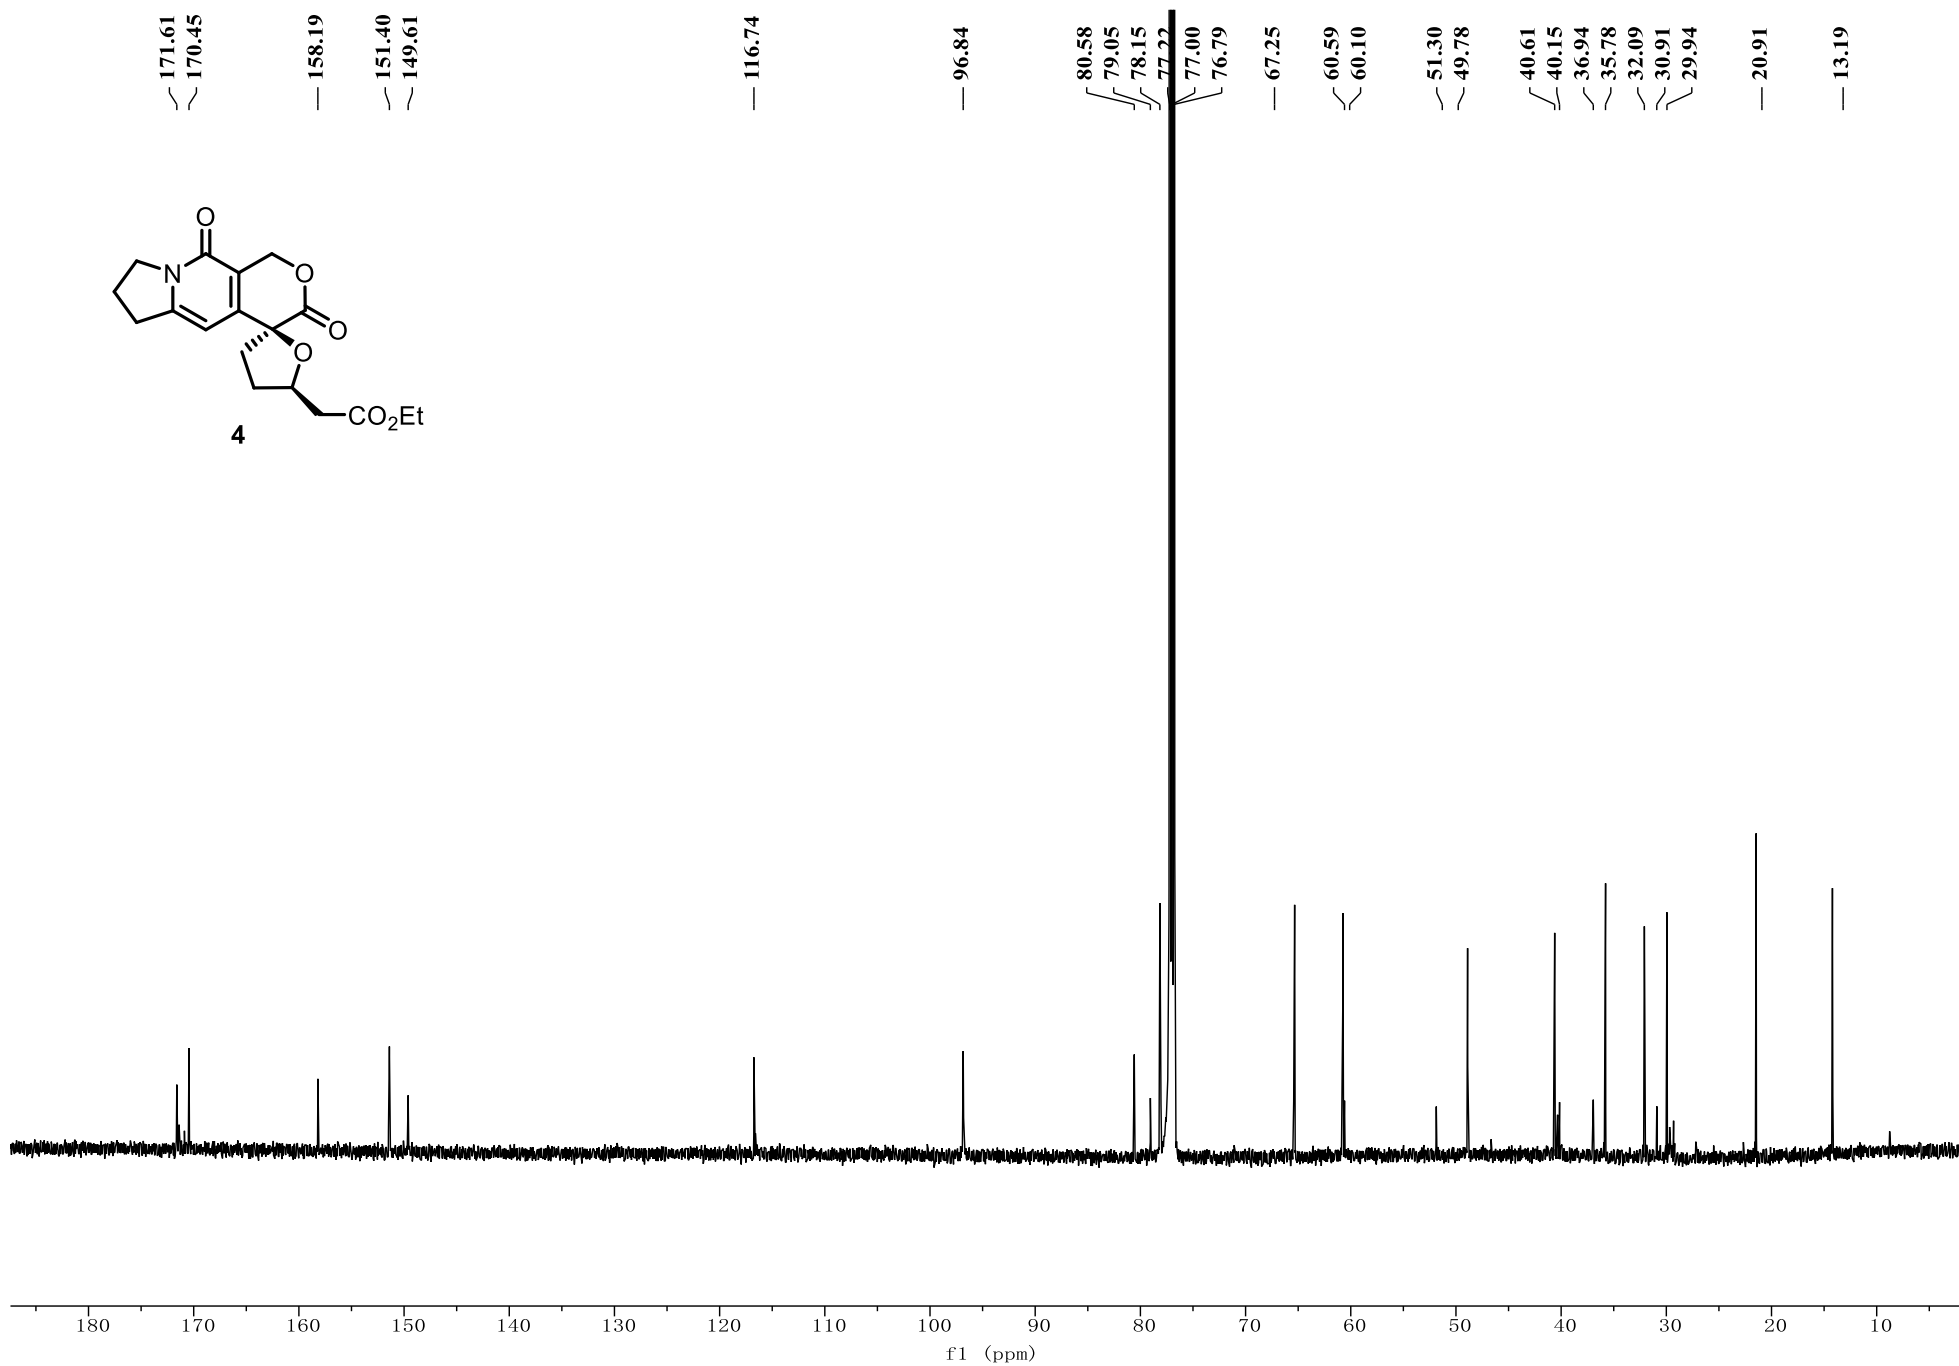

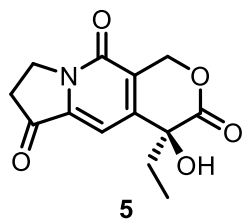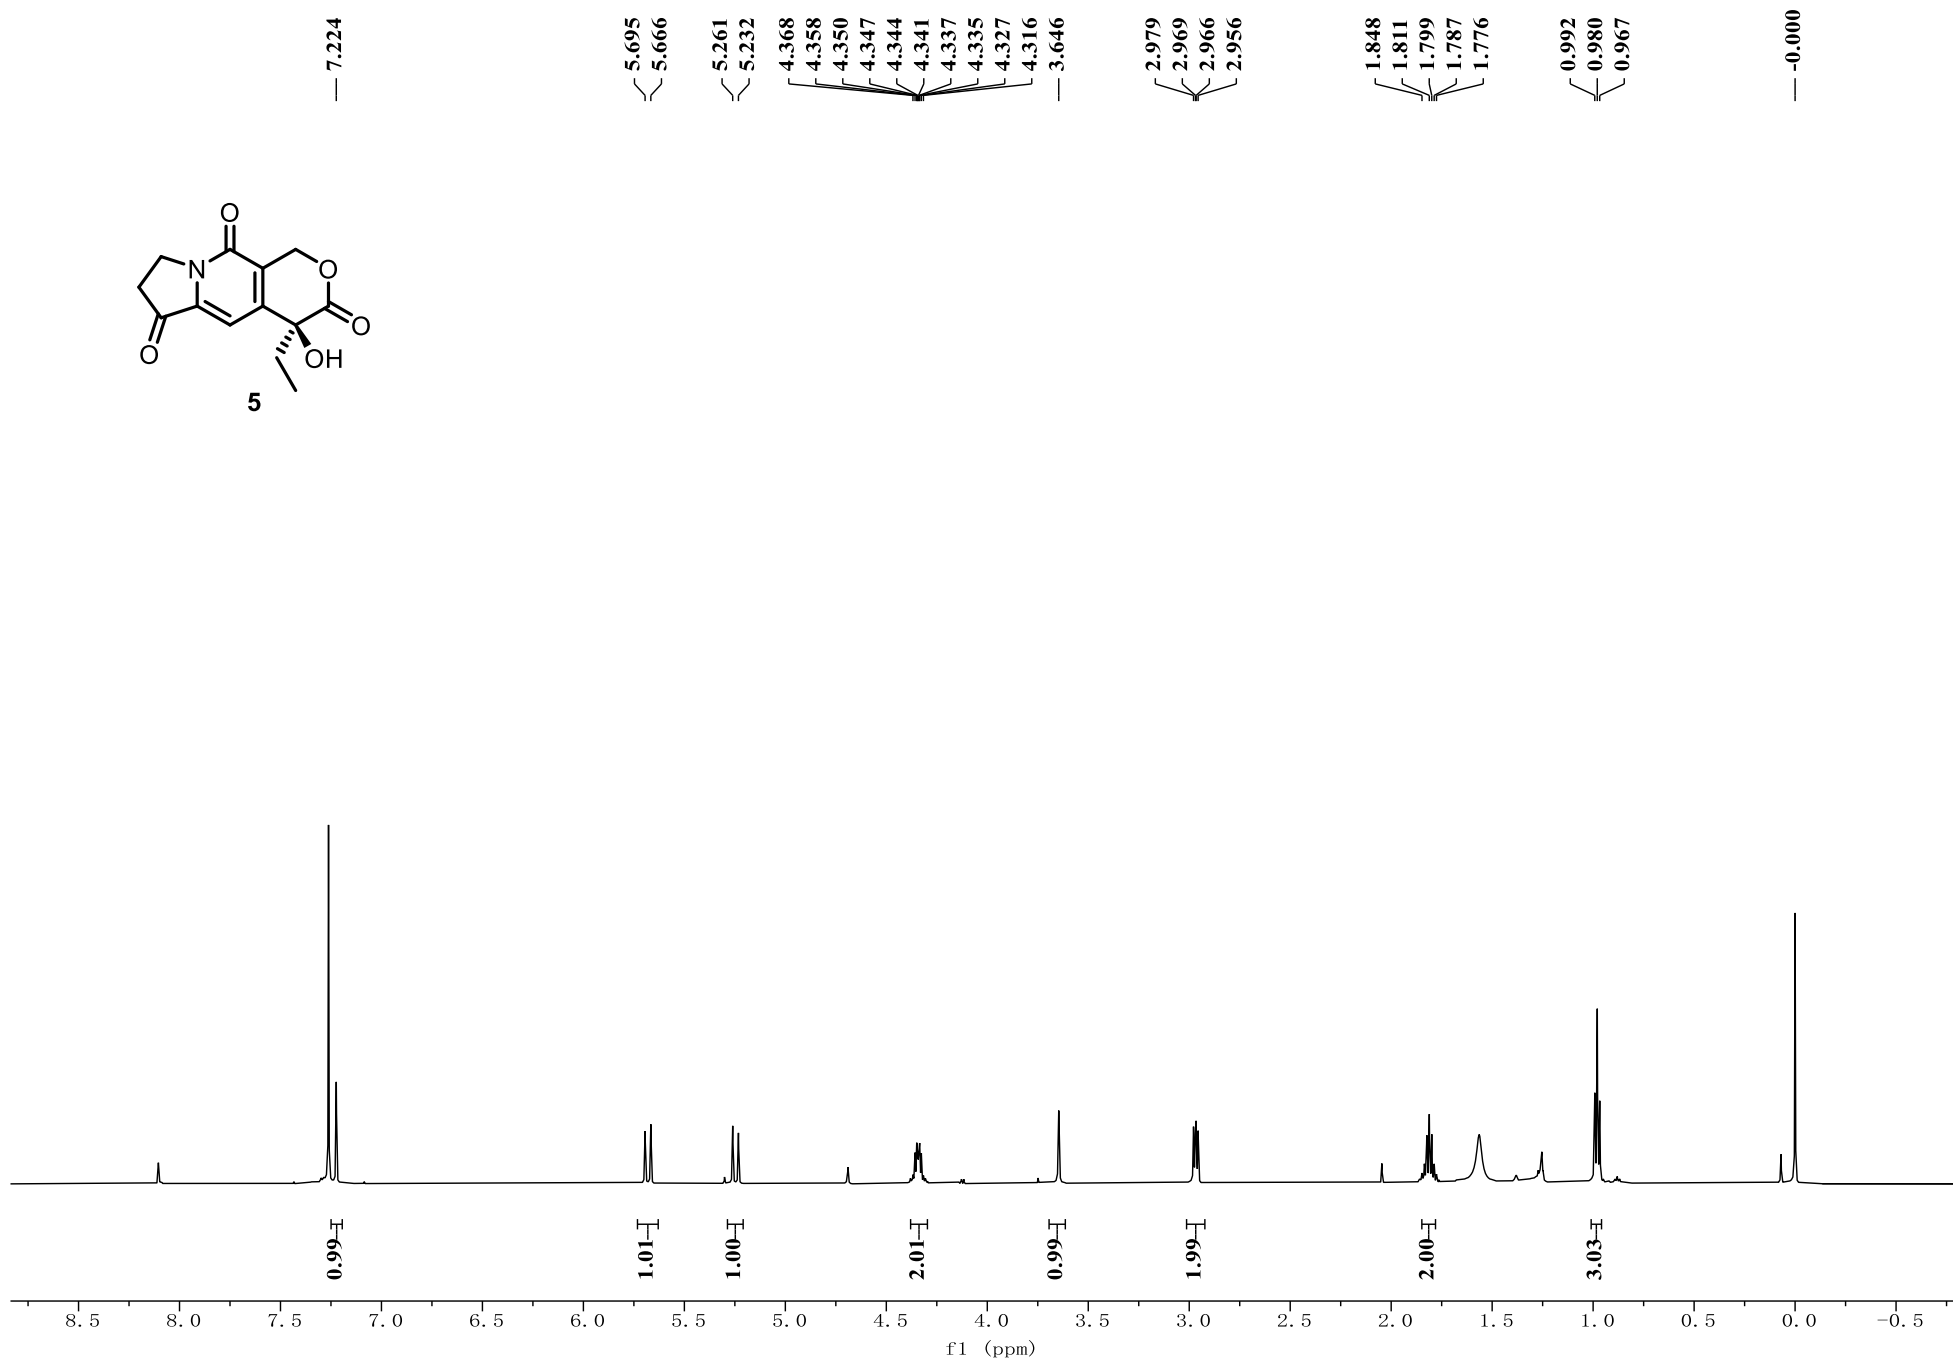

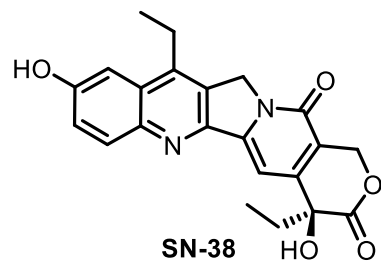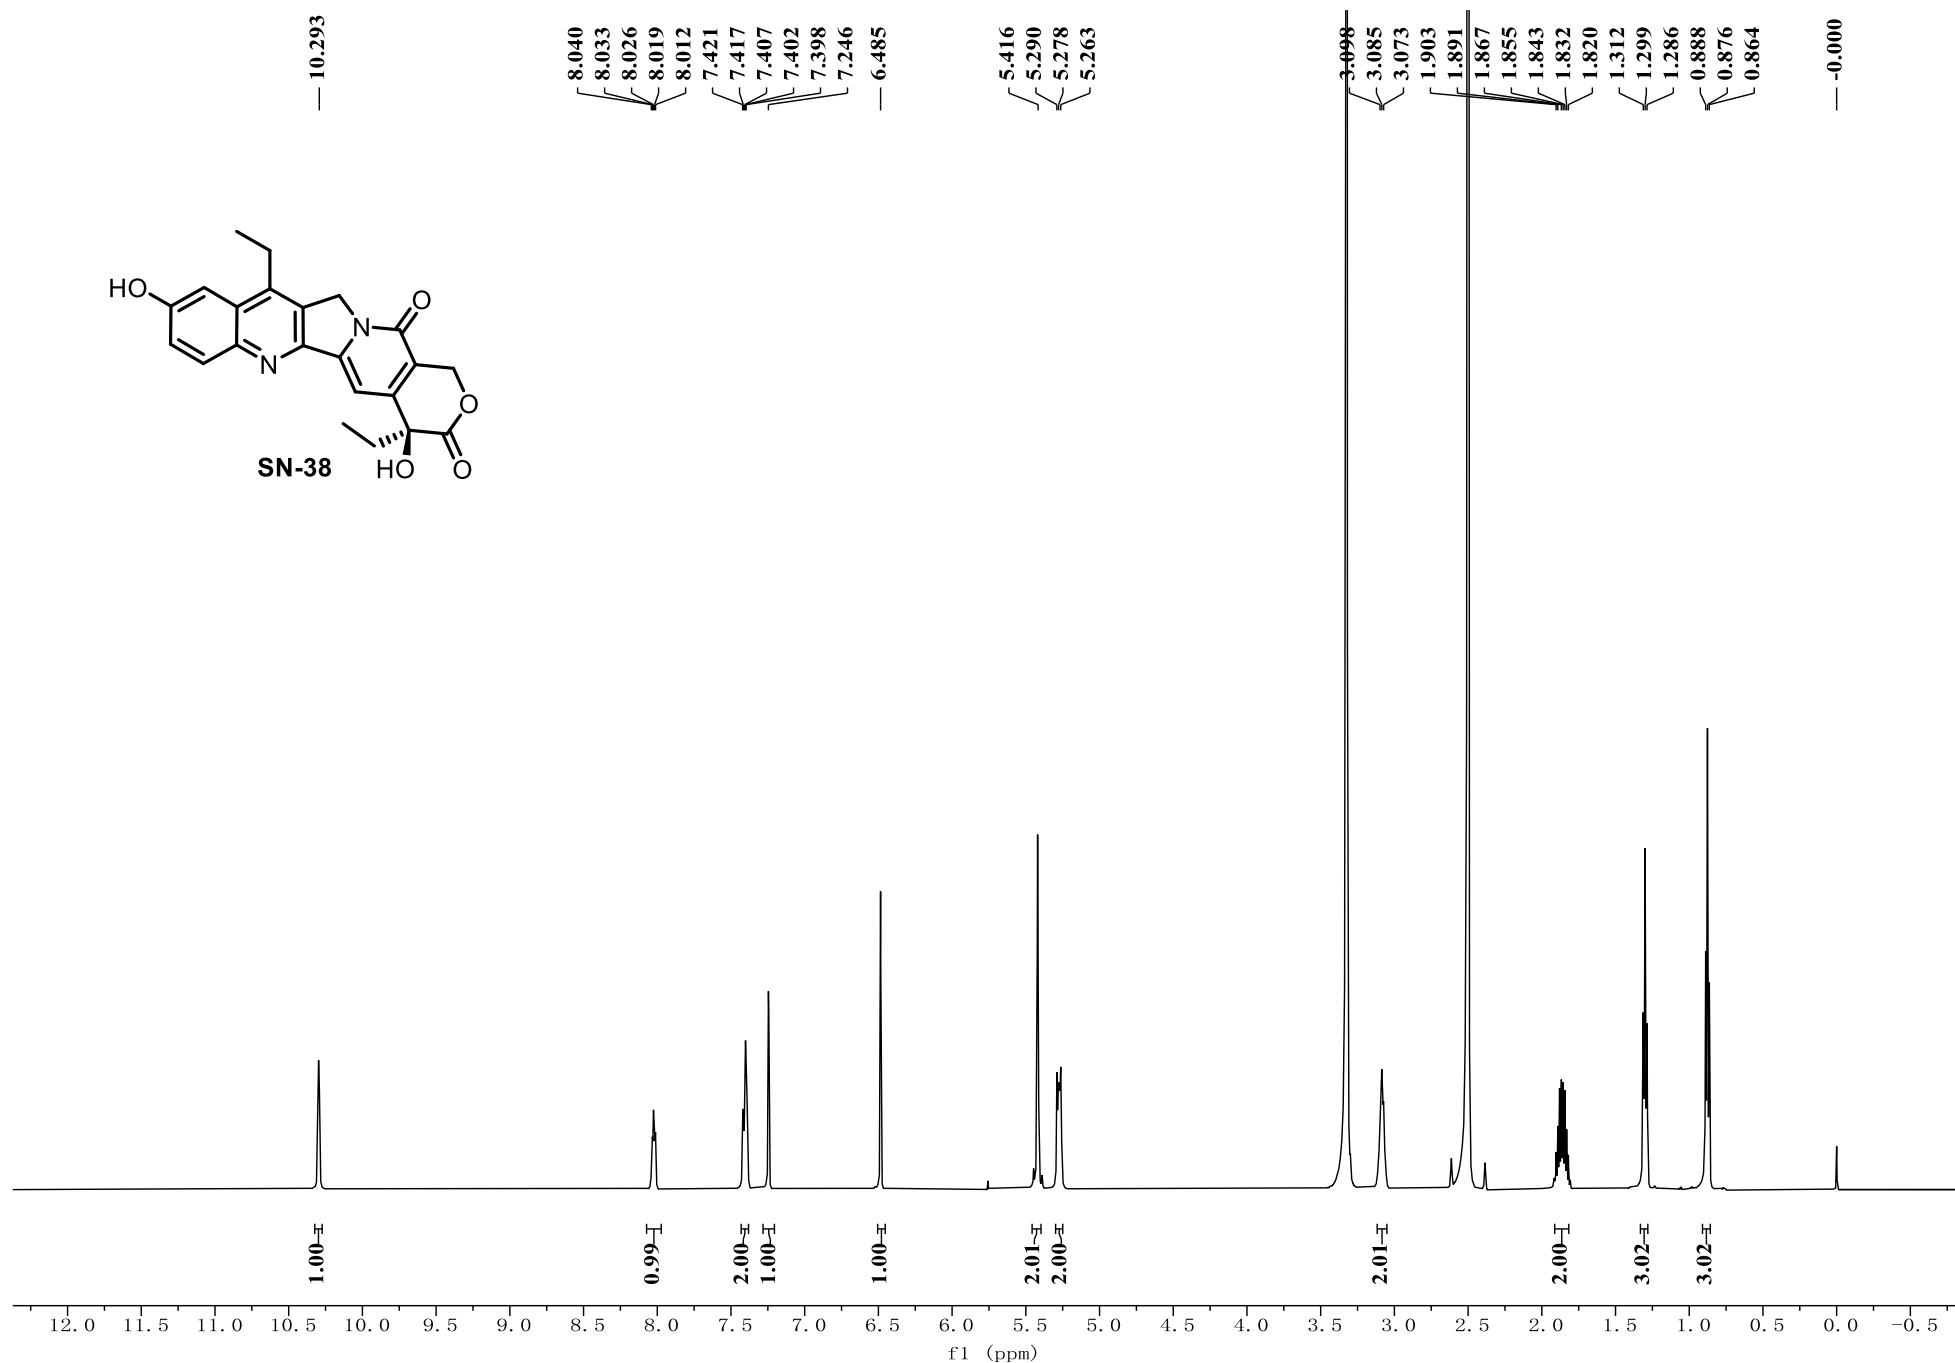

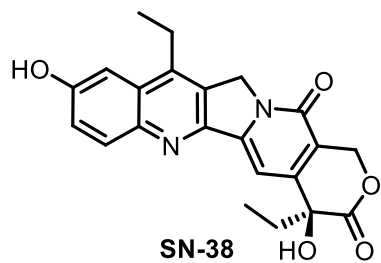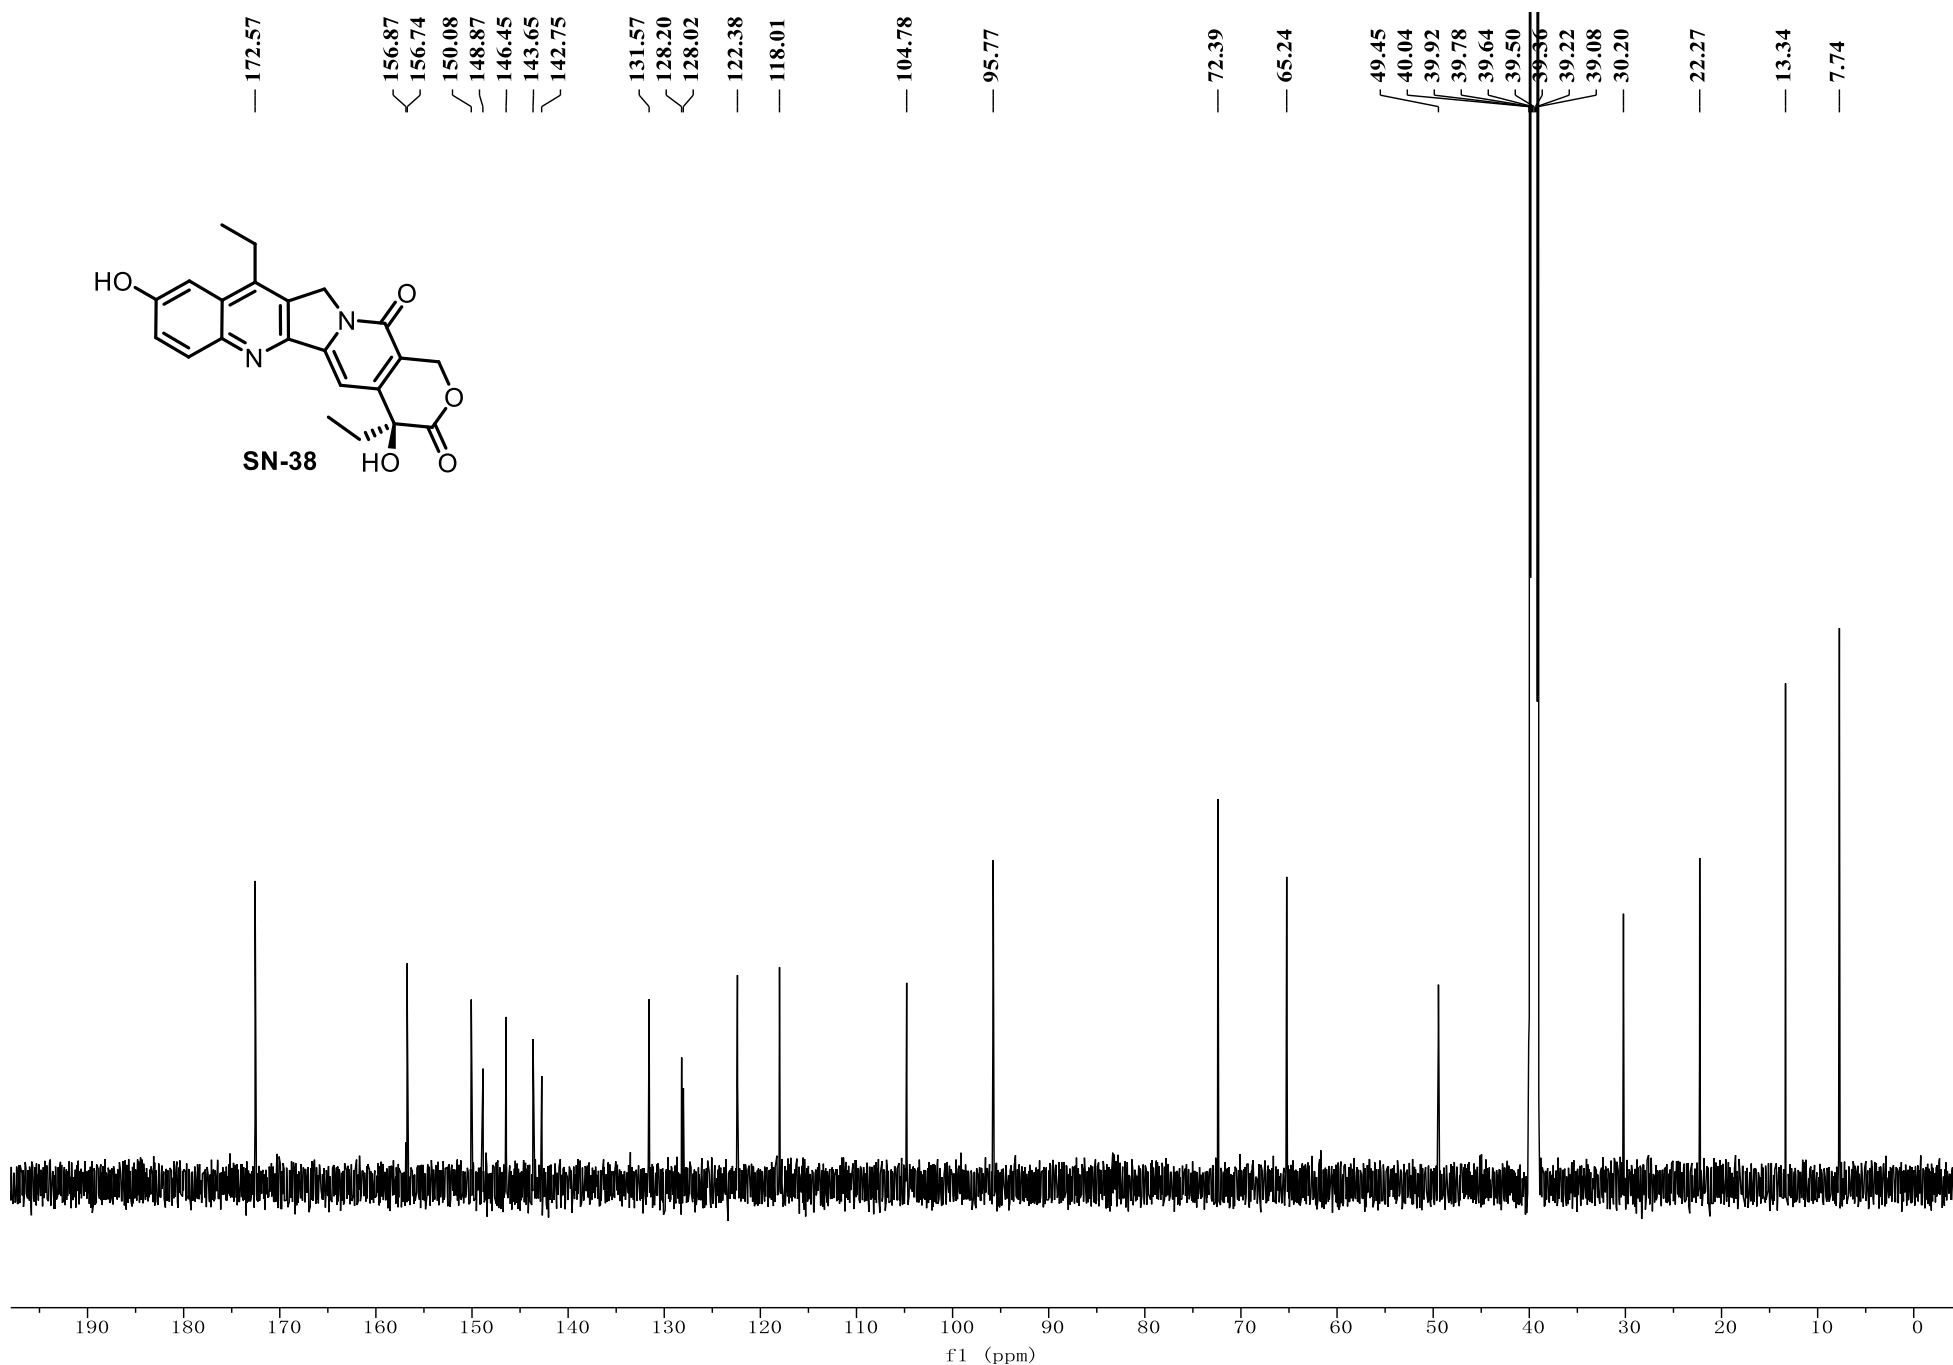

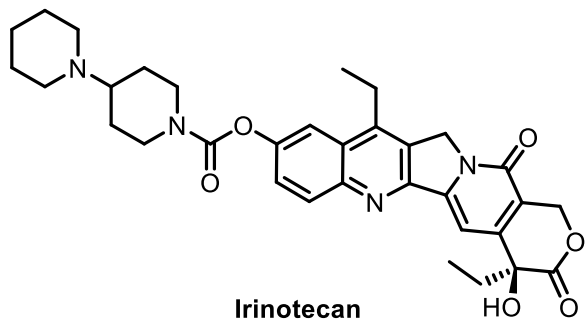

Irinotecan

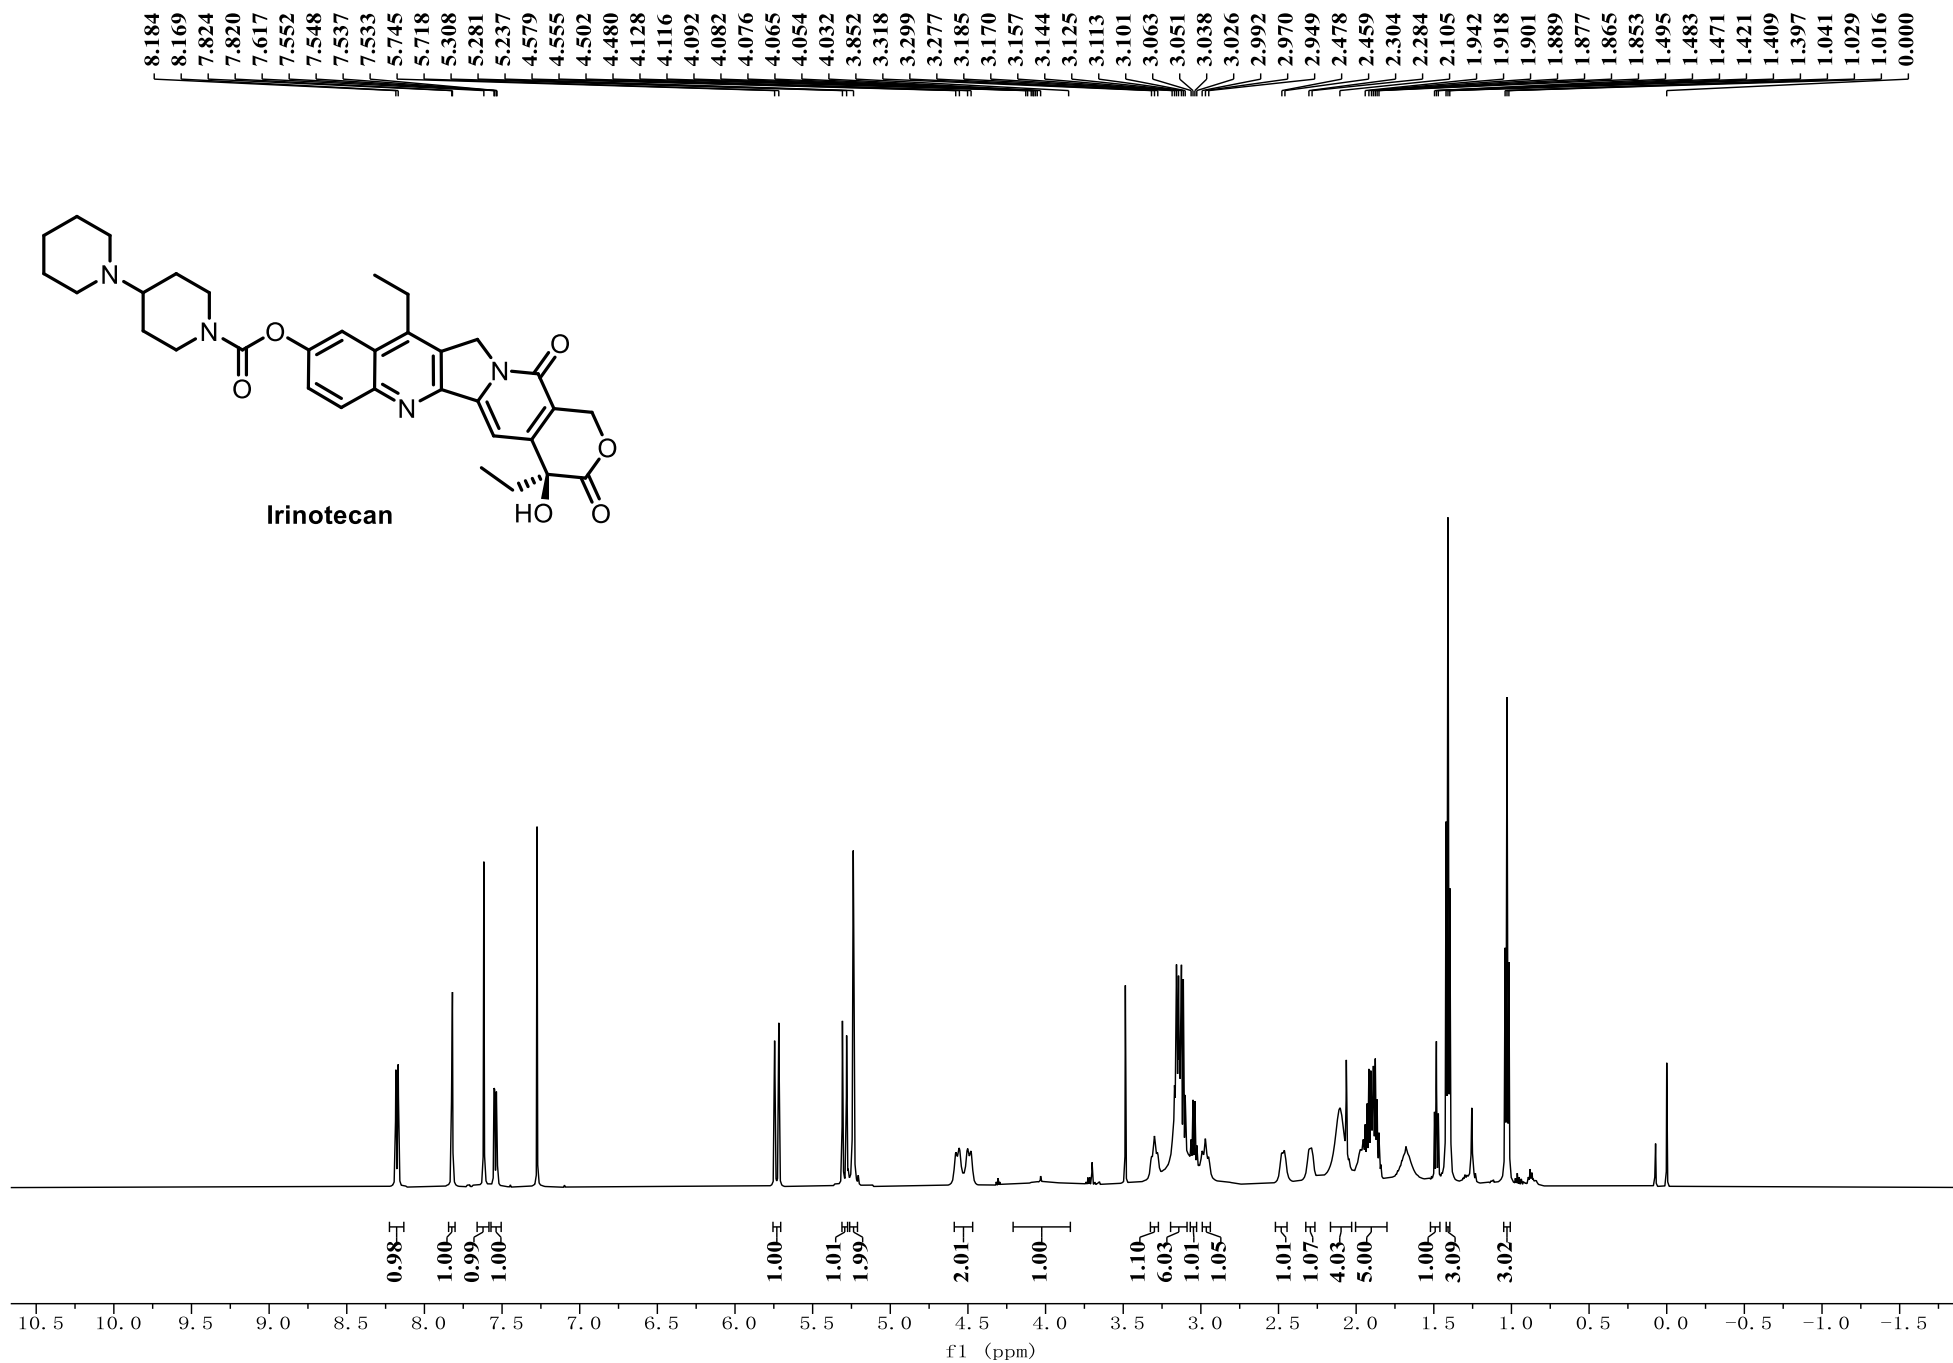

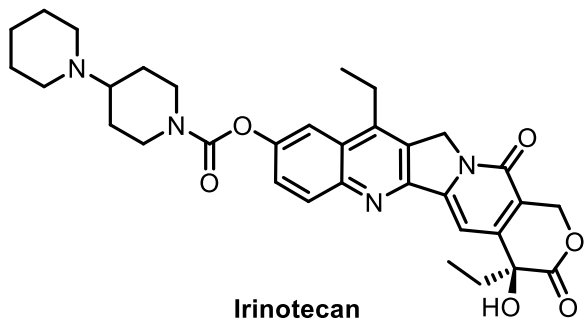

Irinotecan

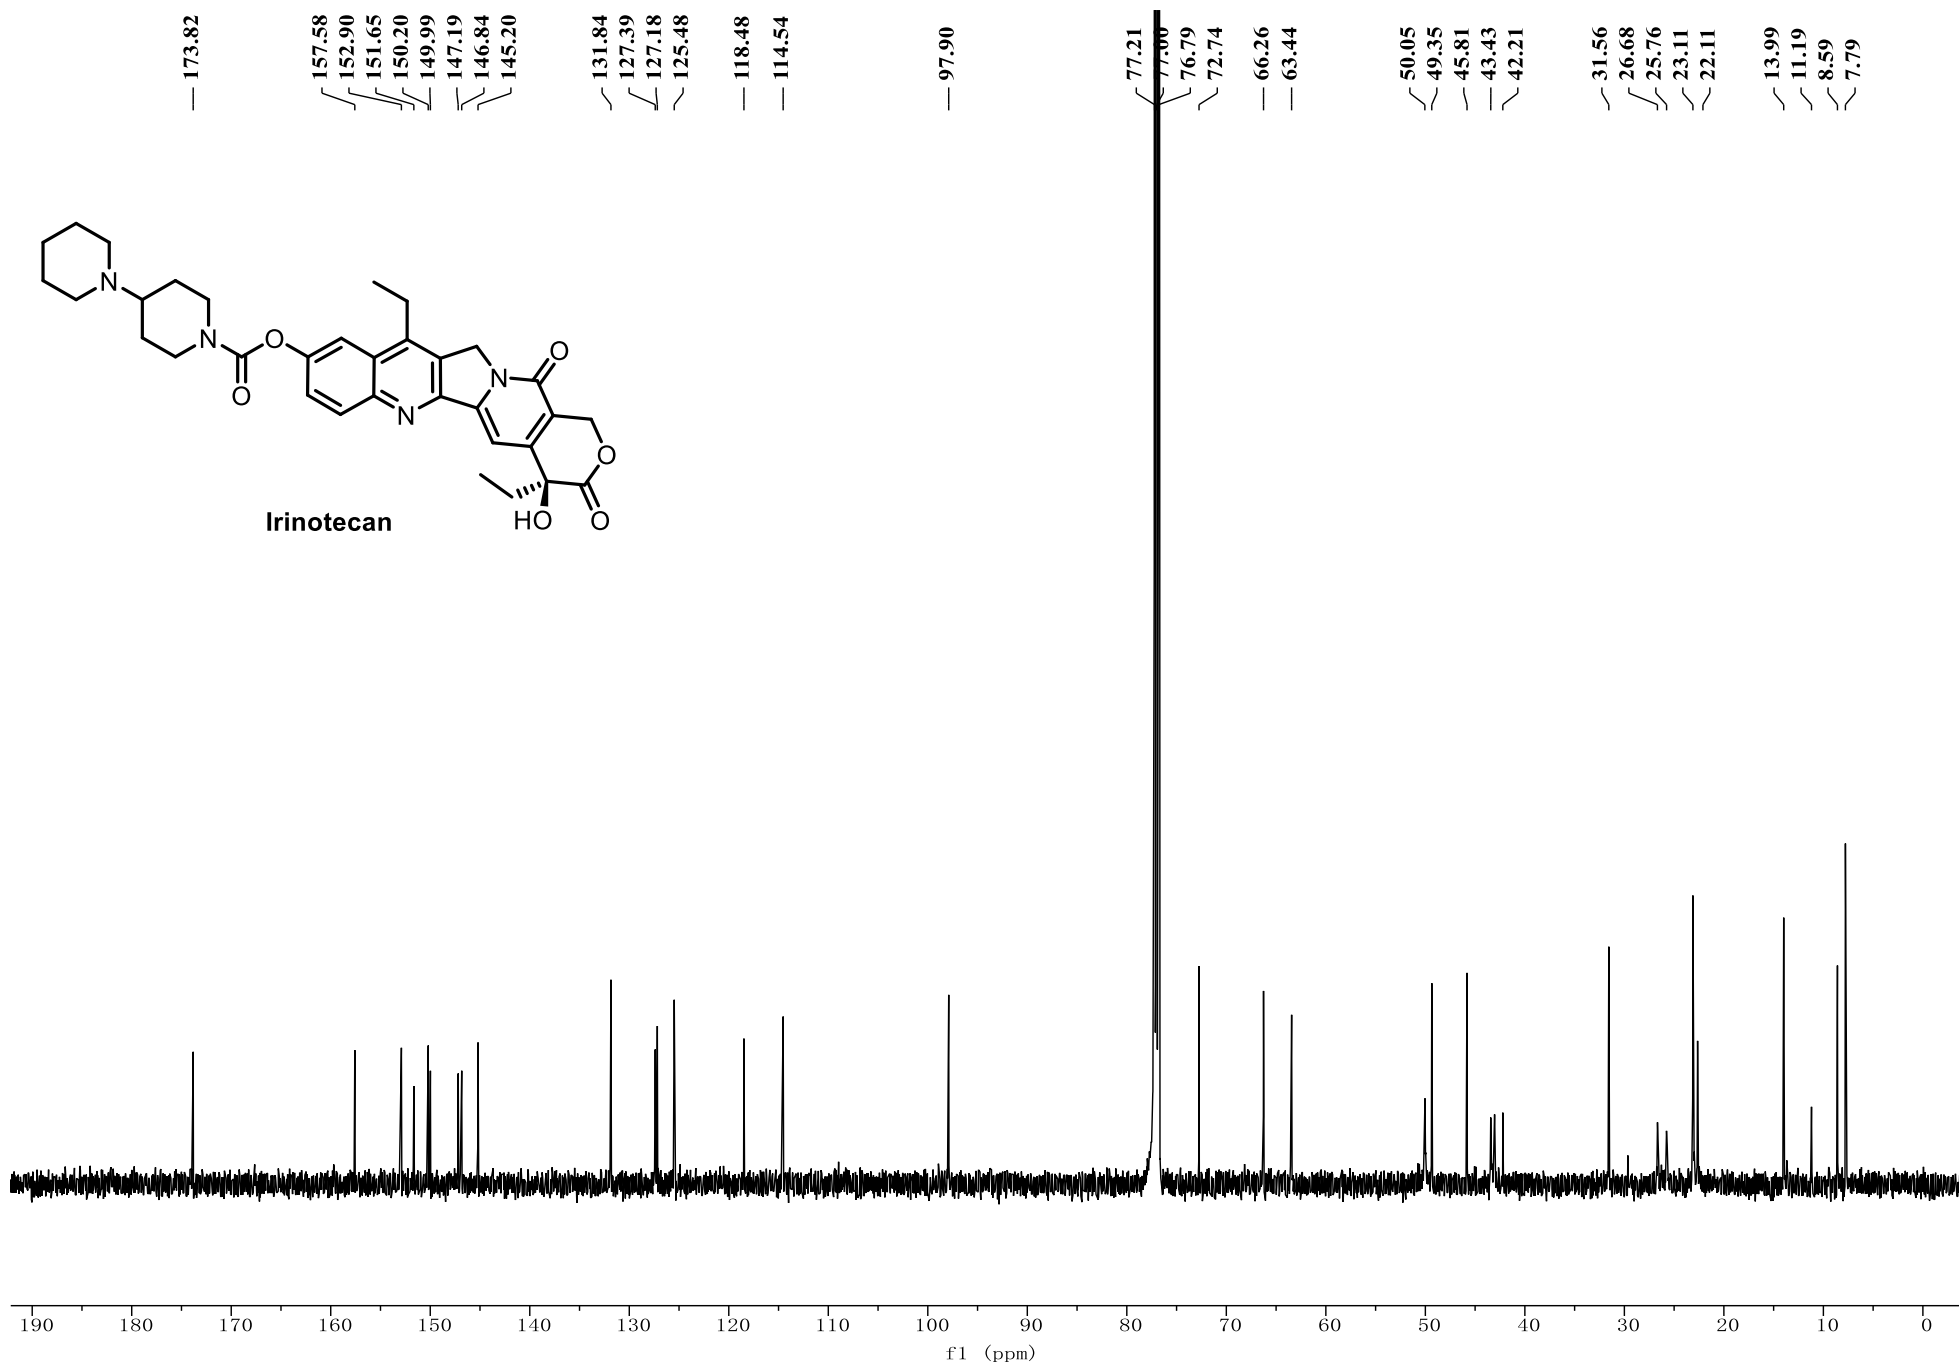

Supplement: d4cc03580a1.pdf [file d4cc03580a1.pdf]
